# Supplementary material for: DNA circles promote yeast ageing in part through stimulating the reorganization of nuclear pore complexes
Source: eLife. 2022 Apr 4;11:e71196. doi: 10.7554/eLife.71196 (PMC9020822; doi:10.7554/eLife.71196)
Supplement: Figure 1—source data 1. [file elife-71196-fig1-data1.xlsx]

## Sheet: Overview
Relative accumulation of proteins in NPC cap (RA)
Median RA	0.904774	0.876621	0.777406	0.911563	2.84287	2.50109	2.00113	2.53259	2.28742	2.44247	2.34059	2.26282	2.76275	1.30546	0.773031	0.381307	0.424673
n	53	16	24	26	43	31	47	15	41	45	44	30	24	34	58	56	31
Strain	Nup116	Gle2	Nup42	Gle1	Nup159	Nup82	Nup84	Nup133	Nup170	Nup53	Nup59	Nic96	Nup1	Nup2	Nup60	Mlp1	Mlp2
	2.50096	0.376415	0.713729	1.63766	1.69705	2.90283	1.01499	2.84536	1.06785	3.92292	3.15458	3.51954	2.85646	0.833959	0.830631	0.381811	0.177197
	0.904774	0.497024	1.0127	0.148204	1.5983	1.82487	1.89531	2.80235	2.4488	3.4106	1.78484	3.78039	3.71771	1.47649	0.514602	0.280109	0.506463
	0.856711	1.10909	1.40202	0.860191	3.30105	2.98918	2.49454	1.76098	3.15106	3.1624	1.63739	2.26877	1.97379	1.15366	0.215806	0.379226	0.797335
	1.43507	1.43105	1.20279	1.03427	3.49193	1.91081	1.37227	2.53259	1.66494	2.589	3.40767	2.44829	1.03468	1.4348	0.822835	0.45009	0.215805
	0.660894	0.652606	0.92688	2.58129	1.68287	2.51132	1.50077	1.59525	1.15549	3.06514	1.30501	1.67304	1.56466	0.82658	0.81137	0.278513	0.295485
	0.820913	1.80275	0.610637	0.140881	1.41592	0.25569	1.81503	3.07724	2.46787	5.38568	3.44485	2.74479	8.75684	1.08971	1.60141	0.705113	0.374666
	0.761037	0.520262	0.70875	2.32761	2.3067	1.74924	1.20903	2.60876	2.30591	2.43015	0.779335	3.47418	1.81548	2.7219	0.582002	0.272211	0.493999
	0.344099	0.71053	2.40666	1.23378	4.57326	6.50694	3.45117	3.74648	1.5934	1.50722	3.44523	2.77611	3.12319	0.906466	0.690859	0.566898	0.639689
	1.45269	0.617134	0.613565	1.32915	1.99841	5.85483	3.12351	2.00236	1.76553	1.99774	2.33475	1.82134	6.25725	1.24095	1.30083	0.281545	0.765286
	2.4196	1.04601	0.560411	1.41296	3.97486	0.922344	1.96595	1.92272	2.54838	1.70172	2.68314	1.83442	6.41529	1.57289	1.18248	0.523429	0.649981
	0.820495	1.11255	3.03791	0.859727	1.04741	1.34275	1.5995	5.87154	4.1368	3.36578	2.41348	2.47577	4.19134	1.43846	0.214888	0.138103	0.218602
	0.711401	0.780438	0.495284	1.97701	2.03028	1.88648	4.92124	4.72798	4.3008	7.57279	1.90708	2.51048	4.37245	1.07707	0.528982		0.048554
	1.014	0.622189	0.718745	1.31195	3.70458	0.649462	2.80337	1.85742	3.13816	1.54782	3.38757	1.27779	2.66904	1.36442	1.22414	0.639387	0.264131
	1.03158	1.4165	0.439222	0.789805	4.9551	3.92196	2.00113	2.24078	3.29335	2.00027	1.55547	2.22302	4.76106	2.55429	0.795697	0.674393	0.309597
	0.626166	0.972805	0.629136	0.766703	3.06516	3.04754	1.56785	2.4336	3.31917	2.21845	2.9429	2.60871	2.07536	1.04263	1.46588	0.495529	0.56594
	0.515889	1.06811	0.492223	0.596848	6.10176	4.21872	1.43601		4.27418	1.93909	3.03668	2.71544	2.63546	0.810114	1.79644	0.376421	0.645139
	0.855734		0.673229	0.115137	1.03987	2.25255	2.3502		2.42989	1.27922	3.62646	2.09629	2.2535	0.824184	1.07683	0.339527	0.262895
	1.62748		0.972111	0.505683	3.02598	4.18129	1.91679		1.45184	3.49504	1.89837	0.765708	1.97262	1.4725	1.1082	0.34269	0.486393
	0.821704		1.00233	0.790789	3.82441	2.67539	2.4963		2.22507	3.56932	2.62796	2.25688	1.97714	1.12686	0.360702	0.667532	0.306856
	0.873904		0.784292	0.962935	3.33777	1.83678	1.63855		1.6056	1.80147	1.50953	3.08492	3.45511	1.34154	1.33265	0.517263	0.424673
	0.889672		1.55977	1.35505	1.4688	4.87831	3.39446		0.909293	2.39092	2.41125	1.18556	3.35075	1.57401	1.03878	0.278019	0.667908
	0.880956		2.09892	0.598042	0.709769	1.63554	1.52031		2.36774	2.5891	2.34642	1.85883	2.33495	1.30764	1.32285	0.398846	1.0407
	0.804151		0.770521	0.161505	1.89772	2.1313	2.50794		4.93398	2.23588	2.57163	1.43012	3.08767	0.599855	0.248218	0.24261	0.325952
	1.84261		1.88845	1.3644	2.31757	2.50109	2.38666		2.17696	2.50939	1.16938	3.2472	2.08501	2.06073	0.375479	0.434695	0.38032
	1.36315			3.20105	2.10233	2.46143	2.90358		2.28742	6.02908	1.40583	1.59258		1.30328	1.77182	0.208408	0.272154
	0.878326			0.715183	2.26436	3.1574	2.29528		2.43194	1.84929	2.21775	5.61375		1.57448	0.189762	0.333088	0.908237
	0.362124				3.00497	2.34884	5.194		2.80573	3.72943	1.71313	2.01836		1.98047	0.0273498	0.425719	1.16373
	1.09137				3.8761	5.80451	2.48442		1.10742	3.73011	6.68187	2.07498		1.96315	0.559214	0.787781	0.834156
	1.14454				4.05056	1.86218	1.24643		2.71644	2.594	2.15429	1.98279		1.41987	0.439967	0.280352	0.626753
	0.822701				3.00752	4.88881	1.88482		3.36544	1.61502	1.71072	2.52907		2.09731	1.2651	0.625064	0.371704
	1.08994				1.58203	5.0901	2.29245		1.9311	1.60197	1.77685			0.852697	0.394428	0.354526	0.361293
	1.23				1.18482		2.28941		1.20054	1.58112	4.92148			1.024	0.91058	0.201856
	0.74721				1.03287		3.48653		1.99507	4.17501	4.28214			0.709285	1.24542	0.297431
	1.12454				2.12899		5.80127		1.35091	2.31336	1.82877			0.879985	0.706276	0.536672
	1.69924				3.23914		1.00351		1.62349	2.56609	2.2995				0.701377	0.187086
	0.778549				5.58279		3.39614		1.18843	2.86568	2.14031				0.929937	0.027525
	0.811143				3.53331		1.74161		2.66319	3.13567	3.62584				0.595909	0.565079
	0.935687				1.08625		2.77966		2.75284	1.85905	2.45952				0.533406	0.245516
	1.22161				5.40056		1.66561		1.99221	1.93228	1.11014				1.00523	0.573882
	0.760886				1.7233		2.23911		2.07231	2.04363	0.906246				0.637571	0.415891
	0.592066				3.62832		1.52186		1.60286	1.92855	2.88821				0.547839	0.579412
	0.967868				2.84287		4.03893			1.62711	5.95524				0.42238	0.340884
	0.914724				3.07839		0.90877			4.56175	1.84834				0.934175	0.315649
	1.35148						1.7636			2.65482	2.92306				0.861494	0.47454
	0.468866						1.55119			2.44247					0.804944	0.249668
	1.04563						0.599994								1.10006	0.703054
	1.18084						2.63183								0.45211	0.242228
	1.0394														0.51692	0.239153
	1.04233														1.63709	0.745295
	0.800369														1.02693	1.14989
	1.16529														1.27471	0.380804
	0.584269														1.30198	0.518893
	1.40141														0.750364	0.547645
															0.568192	0.688724
															0.493773	0.190416
															0.3735	0.521159
															0.486668	0.300603
															0.479779	NA
																NA
																NA
																NA

## Sheet: Nup82
Nup82-GFP						1								2								3								4								5								6
						Ic				Ir		Ibg		Ic				Ir		Ibg		Ic				Ir		Ibg		Ic				Ir		Ibg		Ic				Ir		Ibg		Ic
							2185.63				706.664		132.264		1096.84				677.186		149.079		1615.17				489.986		216.185		1173.32				643.898		251.588		1770.27				570.298		185.713		1851.19
							2053.37								947.765								1398.99								921.736								1584.56								1678.18
	average	median	SEM	n		Relative accumulation (RA)					574.4			Relative accumulation (RA)					528.107			Relative accumulation (RA)					273.801			Relative accumulation (RA)					392.31			Relative accumulation (RA)					384.585			Relative accumulation (RA)
RA:	3.8773	3.61228	0.337216	42		3.5748								1.79465								5.10951								2.34951								4.12018								3.64975
	p-value
	1.75625e-13
						140925_VizSt_Nup82_01_01Crop1_merge.tifGFP_x_lc	140925_VizSt_Nup82_01_01Crop1_merge.tifGFP_y_lc	140925_VizSt_Nup82_01_01Crop1_merge.tifmCh_x_cap	140925_VizSt_Nup82_01_01Crop1_merge.tifmCh_y_cap	140925_VizSt_Nup82_01_01Crop1_merge.tifGFP_x_lr	140925_VizSt_Nup82_01_01Crop1_merge.tifGFP_y_lr	140925_VizSt_Nup82_01_01Crop1_merge.tifGFP_x_bg	140925_VizSt_Nup82_01_01Crop1_merge.tifGFP_y_bg	140925_VizSt_Nup82_01_01Crop2_merge.tifGFP_x_lc	140925_VizSt_Nup82_01_01Crop2_merge.tifGFP_y_lc	140925_VizSt_Nup82_01_01Crop2_merge.tifmCh_x_cap	140925_VizSt_Nup82_01_01Crop2_merge.tifmCh_y_cap	140925_VizSt_Nup82_01_01Crop2_merge.tifGFP_x_lr	140925_VizSt_Nup82_01_01Crop2_merge.tifGFP_y_lr	140925_VizSt_Nup82_01_01Crop2_merge.tifGFP_x_bg	140925_VizSt_Nup82_01_01Crop2_merge.tifGFP_y_bg	140925_VizSt_Nup82_01_01Crop3_merge.tifGFP_x_lc	140925_VizSt_Nup82_01_01Crop3_merge.tifGFP_y_lc	140925_VizSt_Nup82_01_01Crop3_merge.tifmCh_x_cap	140925_VizSt_Nup82_01_01Crop3_merge.tifmCh_y_cap	140925_VizSt_Nup82_01_01Crop3_merge.tifGFP_x_lr	140925_VizSt_Nup82_01_01Crop3_merge.tifGFP_y_lr	140925_VizSt_Nup82_01_01Crop3_merge.tifGFP_x_bg	140925_VizSt_Nup82_01_01Crop3_merge.tifGFP_y_bg	140925_VizSt_Nup82_01_12Crop2_merge.tifGFP_x_lc	140925_VizSt_Nup82_01_12Crop2_merge.tifGFP_y_lc	140925_VizSt_Nup82_01_12Crop2_merge.tifmCh_x_cap	140925_VizSt_Nup82_01_12Crop2_merge.tifmCh_y_cap	140925_VizSt_Nup82_01_12Crop2_merge.tifGFP_x_lr	140925_VizSt_Nup82_01_12Crop2_merge.tifGFP_y_lr	140925_VizSt_Nup82_01_12Crop2_merge.tifGFP_x_bg	140925_VizSt_Nup82_01_12Crop2_merge.tifGFP_y_bg	140925_VizSt_Nup82_01_12Crop3_merge.tifGFP_x_lc	140925_VizSt_Nup82_01_12Crop3_merge.tifGFP_y_lc	140925_VizSt_Nup82_01_12Crop3_merge.tifmCh_x_cap	140925_VizSt_Nup82_01_12Crop3_merge.tifmCh_y_cap	140925_VizSt_Nup82_01_12Crop3_merge.tifGFP_x_lr	140925_VizSt_Nup82_01_12Crop3_merge.tifGFP_y_lr	140925_VizSt_Nup82_01_12Crop3_merge.tifGFP_x_bg	140925_VizSt_Nup82_01_12Crop3_merge.tifGFP_y_bg	140925_VizSt_Nup82_01_12Crop5_merge.tifGFP_x_lc	140925_VizSt_Nup82_01_12Crop5_merge.tifGFP_y_lc	140925_VizSt_Nup82_01_12Crop5_merge.tifmCh_x_cap	140925_VizSt_Nup82_01_12Crop5_merge.tifmCh_y_cap
					1	0	2227	0	400	0	305	0	133	0	927	0	807	0	739	0	137	0	765	0	84	0	679	0	215	0	1285	0	226	0	547	0	235	0	1124	0	720	0	466	0	162	0	911	0	886
					2	0.064	3197	0.064	667.188	0.064	205.706	0.064	136.92	0.064	1386.84	0.064	1267.33	0.064	723.92	0.064	143.089	0.064	854.412	0.064	104.498	0.064	683.07	0.064	230.502	0.064	1900.24	0.064	404.034	0.064	843	0.064	228.591	0.064	1641.88	0.064	910	0.064	576.401	0.064	150.167	0.064	1318	0.064	1288.76
					3	0.128	3260	0.128	1026.58	0.128	175.977	0.128	139.262	0.128	1770.17	0.128	1543.93	0.128	755.4	0.128	133.432	0.128	997.984	0.128	131.981	0.128	648.68	0.128	221.601	0.128	2650.46	0.128	723.585	0.128	1170	0.128	219.629	0.128	2213.15	0.128	1129	0.128	692.329	0.128	146.519	0.128	1866	0.128	1736.2
					4	0.192	2801	0.192	1394.98	0.192	179.01	0.192	139.341	0.192	1870.4	0.192	1591.74	0.192	767.44	0.192	117.257	0.192	1251.08	0.192	181.959	0.192	602.586	0.192	213.394	0.192	3173.07	0.192	1023.38	0.192	1300	0.192	214.989	0.192	2516.34	0.192	1382	0.192	783.283	0.192	154.443	0.192	2549	0.192	2225.41
					5	0.256	2419	0.256	1605.98	0.256	193.975	0.256	131.419	0.256	1622.01	0.256	1544.63	0.256	740.04	0.256	118.674	0.256	1546.39	0.256	239.025	0.256	529.306	0.256	197.506	0.256	2976.79	0.256	1115.39	0.256	1324	0.256	224.825	0.256	2744.88	0.256	1559	0.256	768.909	0.256	160.85	0.256	2984	0.256	2513.43
					6	0.32	2294	0.32	1808.87	0.32	213.409	0.32	116.828	0.32	1419.45	0.32	1529.24	0.32	761	0.32	124.945	0.32	1822.33	0.32	332.345	0.32	489.801	0.32	192.3	0.32	2708.07	0.32	989.009	0.32	1315	0.32	242.19	0.32	2748.68	0.32	1620	0.32	695.787	0.32	163.1	0.32	2582.52	0.32	2615.59
					7	0.384	2357.82	0.384	2004.53	0.384	269.401	0.384	113.162	0.384	1254.63	0.384	1508.71	0.384	754.679	0.384	130.182	0.384	1892.96	0.384	491.04	0.384	484.845	0.384	196.346	0.384	2305.49	0.384	730.942	0.384	1259	0.384	229.839	0.384	2481.72	0.384	1604	0.384	570.883	0.384	164.997	0.384	2203.3	0.384	2624.09
					8	0.448	2596.6	0.448	2156.28	0.448	375.707	0.448	114.574	0.448	1278.14	0.448	1477.84	0.448	695.84	0.448	134.045	0.448	2030.73	0.448	618.992	0.448	435.887	0.448	207.616	0.448	1530.61	0.448	592.625	0.448	1191	0.448	225.471	0.448	2162.56	0.448	1463	0.448	450.013	0.448	164.614	0.448	1882.23	0.448	2626.12
					9	0.512	2774.92	0.512	2195.87	0.512	519.043	0.512	119.275	0.512	1361	0.512	1519.63	0.512	691.182	0.512	137.684	0.512	1988.34	0.512	749.803	0.512	467.533	0.512	224.945	0.512	888.062	0.512	592.498	0.512	960	0.512	246.234	0.512	1951	0.512	1451	0.512	361.226	0.512	170.893	0.512	1697.58	0.512	2615.3
					10	0.576	2717.42	0.576	2240.59	0.576	697.731	0.576	114.88	0.576	1292.4	0.576	1666.57	0.576	779.322	0.576	148.45	0.576	1925.21	0.576	957.122	0.576	532.854	0.576	234.83	0.576	502.419	0.576	718.038	0.576	730	0.576	253.37	0.576	1709.72	0.576	1427	0.576	296.347	0.576	172.912	0.576	1647.51	0.576	2585.94
					11	0.64	2686.02	0.64	2241.04	0.64	783.466	0.64	106.566	0.64	1080	0.64	1885.86	0.64	838.447	0.64	153.917	0.64	1727.63	0.64	1167.71	0.64	571.085	0.64	241.217	0.64	308.06	0.64	952.991	0.64	753.375	0.64	239.092	0.64	1334.69	0.64	1301	0.64	274.667	0.64	180.06	0.64	1388.4	0.64	2490.8
					12	0.704	2880.13	0.704	2252.19	0.704	771.822	0.704	112.246	0.704	845.2	0.704	2076.97	0.704	825.745	0.704	141.867	0.704	1620.78	0.704	1230.48	0.704	620.861	0.704	227.198	0.704	206.513	0.704	1218.22	0.704	734.735	0.704	249.91	0.704	1035.86	0.704	1269	0.704	313.773	0.704	180.667	0.704	1184.72	0.704	2338.79
					13	0.768	3030.01	0.768	2206.88	0.768	688.462	0.768	114.672	0.768	640.2	0.768	2165.77	0.768	720.227	0.768	127.137	0.768	1700.58	0.768	1154.42	0.768	693.185	0.768	218.353	0.768	164.696	0.768	1424.12	0.768	627.123	0.768	256.069	0.768	938.553	0.768	1243	0.768	406.751	0.768	178.408	NA	NA	0.768	1891.95
					14	0.832	2893.22	0.832	2061.94	0.832	622.171	0.832	114.785	0.832	488.2	0.832	2055.57	0.832	550.829	0.832	126.403	0.832	1944.88	0.832	1047.42	0.832	749.693	0.832	235.785	0.832	173.97	0.832	1747.06	0.832	520.184	0.832	248.456	0.832	983.774	0.832	1092	0.832	530.118	0.832	176.082	NA	NA	0.832	1241.27
					15	0.896	2536.54	0.896	1931.23	0.896	615.422	0.896	117.42	0.896	397	0.896	1816.75	0.896	504	0.896	133.727	0.896	2159.29	0.896	961.088	0.896	784.877	0.896	270.212	0.896	202.263	0.896	1887.43	0.896	459.882	0.896	258.65	0.896	967.279	0.896	855	0.896	716.938	0.896	184.031	NA	NA	0.896	697.524
					16	0.96	2055.23	0.96	1818.23	0.96	610.887	0.96	117.614	0.96	422.4	0.96	1602.07	0.96	526.28	0.96	142.581	NA	NA	0.96	782.12	0.96	845.015	0.96	292.487	0.96	241.29	0.96	1821.14	0.96	465.285	0.96	273.4	NA	NA	NA	NA	0.96	907.304	0.96	197.222	NA	NA	0.96	343.629
					17	1.024	1561.03	1.024	1622.82	1.024	588.332	1.024	116.889	1.024	618.6	1.024	1434.45	1.024	598.79	1.024	148.597	NA	NA	1.024	612.015	1.024	880.842	1.024	283.963	1.024	310.527	1.024	1780.98	1.024	507.863	1.024	284.5	NA	NA	NA	NA	1.024	1010.47	1.024	198.436	NA	NA	NA	NA
					18	1.088	1276.45	1.088	1385.93	1.088	516.55	1.088	118.906	1.088	928.6	1.088	1198.17	1.088	649.233	1.088	148.665	NA	NA	1.088	509.809	1.088	847.603	1.088	269.549	1.088	409.143	1.088	1800.41	1.088	538.116	1.088	292.25	NA	NA	NA	NA	1.088	972.326	1.088	187.155	NA	NA	NA	NA
					19	1.152	1151.59	1.152	1174.72	1.152	411.937	1.152	122.07	1.152	1237.8	1.152	844.626	1.152	651.155	1.152	140.481	NA	NA	1.152	425.529	1.152	771.473	1.152	261.417	1.152	551.035	1.152	1661.24	1.152	600.341	1.152	299.95	NA	NA	NA	NA	1.152	957.251	1.152	173.776	NA	NA	NA	NA
					20	1.216	1138.28	1.216	1062.16	1.216	368.02	1.216	125.668	NA	NA	1.216	501.671	1.216	626.726	1.216	133.194	NA	NA	NA	NA	1.216	712.38	1.216	260.972	1.216	814.453	1.216	1578.49	1.216	626.075	1.216	306.45	NA	NA	NA	NA	1.216	944.279	1.216	174.13	NA	NA	NA	NA
					21	1.28	1175.77	1.28	833.852	1.28	381.82	1.28	125.959	NA	NA	1.28	273.829	1.28	671.225	1.28	129.653	NA	NA	NA	NA	1.28	623.26	1.28	250.513	1.28	1159.08	1.28	1456.57	1.28	660.832	1.28	293.5	NA	NA	NA	NA	1.28	871.321	1.28	170.427	NA	NA	NA	NA
					22	1.344	1193.32	1.344	554.269	1.344	450.67	1.344	135.684	NA	NA	1.344	169.701	1.344	790.405	1.344	126.988	NA	NA	NA	NA	1.344	470.458	1.344	246.644	1.344	1325.91	1.344	1130	1.344	860.488	1.344	262.15	NA	NA	NA	NA	1.344	862.84	1.344	171.928	NA	NA	NA	NA
					23	1.408	1290.27	NA	NA	1.408	583.66	1.408	141.458	NA	NA	1.408	133.117	1.408	857.019	1.408	133.82	NA	NA	NA	NA	1.408	343.074	1.408	243.498	1.408	1252.29	1.408	726.751	1.408	1274.88	1.408	235	NA	NA	NA	NA	1.408	936.373	1.408	178.104	NA	NA	NA	NA
					24	1.472	1530.68	NA	NA	1.472	796.88	1.472	132.398	NA	NA	NA	NA	1.472	749.114	1.472	151.077	NA	NA	NA	NA	1.472	317.758	1.472	235.368	1.472	1120.34	NA	NA	1.472	1676.95	1.472	227.6	NA	NA	NA	NA	1.472	1015.88	1.472	187.178	NA	NA	NA	NA
					25	1.536	1597.44	NA	NA	1.536	963.91	1.536	124.037	NA	NA	NA	NA	1.536	606.581	1.536	154.63	NA	NA	NA	NA	1.536	285.162	1.536	232.46	NA	NA	NA	NA	1.536	1771.09	1.536	234.7	NA	NA	NA	NA	1.536	1065.26	1.536	184.418	NA	NA	NA	NA
					26	NA	NA	NA	NA	1.6	928.947	1.6	133.854	NA	NA	NA	NA	1.6	499.31	1.6	139.374	NA	NA	NA	NA	1.6	277.344	1.6	251.551	NA	NA	NA	NA	1.6	1497.9	1.6	237.55	NA	NA	NA	NA	1.6	993.914	1.6	187.252	NA	NA	NA	NA
					27	NA	NA	NA	NA	1.664	849.161	1.664	140.211	NA	NA	NA	NA	1.664	469.175	1.664	132.335	NA	NA	NA	NA	1.664	292.477	1.664	267.868	NA	NA	NA	NA	1.664	1033.58	1.664	237.9	NA	NA	NA	NA	1.664	922.733	1.664	196.73	NA	NA	NA	NA
					28	NA	NA	NA	NA	1.728	714.093	1.728	142.024	NA	NA	NA	NA	1.728	508.738	1.728	134.237	NA	NA	NA	NA	1.728	293.551	1.728	260.521	NA	NA	NA	NA	1.728	575.97	1.728	243.95	NA	NA	NA	NA	1.728	972.352	1.728	196.771	NA	NA	NA	NA
					29	NA	NA	NA	NA	1.792	649.409	1.792	138.345	NA	NA	NA	NA	1.792	611.347	1.792	138.528	NA	NA	NA	NA	1.792	293.582	1.792	252.169	NA	NA	NA	NA	1.792	345.873	1.792	259.45	NA	NA	NA	NA	1.792	1025.35	1.792	189.925	NA	NA	NA	NA
					30	NA	NA	NA	NA	1.856	679.374	1.856	142.567	NA	NA	NA	NA	1.856	724.659	1.856	132.951	NA	NA	NA	NA	1.856	304.523	1.856	242.914	NA	NA	NA	NA	1.856	277.184	1.856	278.65	NA	NA	NA	NA	1.856	1007.52	1.856	191.481	NA	NA	NA	NA
					31	NA	NA	NA	NA	1.92	777.076	1.92	143.76	NA	NA	NA	NA	1.92	801.632	1.92	121.251	NA	NA	NA	NA	1.92	338.03	1.92	233.557	NA	NA	NA	NA	1.92	269.121	1.92	274.05	NA	NA	NA	NA	1.92	1181.52	1.92	196.024	NA	NA	NA	NA
					32	NA	NA	NA	NA	1.984	836.198	1.984	144.156	NA	NA	NA	NA	1.984	801.26	1.984	126.274	NA	NA	NA	NA	1.984	399.418	1.984	223.454	NA	NA	NA	NA	1.984	307.149	1.984	251.15	NA	NA	NA	NA	1.984	1253.88	1.984	195.618	NA	NA	NA	NA
					33	NA	NA	NA	NA	2.048	787.827	2.048	151.575	NA	NA	NA	NA	2.048	786.435	2.048	130.353	NA	NA	NA	NA	2.048	456.541	2.048	217.461	NA	NA	NA	NA	2.048	320.711	2.048	239.52	NA	NA	NA	NA	2.048	1145.68	2.048	200.168	NA	NA	NA	NA
					34	NA	NA	NA	NA	2.112	711.921	2.112	146.066	NA	NA	NA	NA	2.112	756.108	2.112	122.122	NA	NA	NA	NA	2.112	483.422	2.112	200.568	NA	NA	NA	NA	2.112	308.198	2.112	240.075	NA	NA	NA	NA	2.112	928.9	2.112	217.224	NA	NA	NA	NA
					35	NA	NA	NA	NA	2.176	622.247	2.176	137.498	NA	NA	NA	NA	2.176	748.309	2.176	135.019	NA	NA	NA	NA	2.176	478.381	2.176	188.797	NA	NA	NA	NA	2.176	292.32	2.176	261.158	NA	NA	NA	NA	2.176	674.892	2.176	203.537	NA	NA	NA	NA
					36	NA	NA	NA	NA	2.24	581.203	2.24	127.13	NA	NA	NA	NA	2.24	754.07	2.24	158.49	NA	NA	NA	NA	2.24	436.755	2.24	193.575	NA	NA	NA	NA	2.24	312.237	2.24	296.254	NA	NA	NA	NA	2.24	500.342	2.24	203.578	NA	NA	NA	NA
					37	NA	NA	NA	NA	2.304	593.525	2.304	127.859	NA	NA	NA	NA	2.304	699.754	2.304	173.804	NA	NA	NA	NA	2.304	417.406	2.304	204.064	NA	NA	NA	NA	2.304	342.57	2.304	311.271	NA	NA	NA	NA	2.304	444.26	2.304	219.434	NA	NA	NA	NA
					38	NA	NA	NA	NA	2.368	628.258	2.368	141.071	NA	NA	NA	NA	2.368	613.373	2.368	191.278	NA	NA	NA	NA	2.368	436.747	2.368	199.306	NA	NA	NA	NA	2.368	387.625	2.368	286.555	NA	NA	NA	NA	2.368	434.423	2.368	221.695	NA	NA	NA	NA
					39	NA	NA	NA	NA	2.432	660.329	2.432	147.847	NA	NA	NA	NA	2.432	529.27	2.432	199.8	NA	NA	NA	NA	2.432	458.294	2.432	199.073	NA	NA	NA	NA	2.432	407.222	2.432	257.272	NA	NA	NA	NA	2.432	468.325	2.432	229.409	NA	NA	NA	NA
					40	NA	NA	NA	NA	2.496	692.225	2.496	146.674	NA	NA	NA	NA	2.496	533.054	2.496	190.829	NA	NA	NA	NA	2.496	427.096	2.496	209.196	NA	NA	NA	NA	2.496	440.271	2.496	232.539	NA	NA	NA	NA	2.496	538.525	2.496	247.155	NA	NA	NA	NA
					41	NA	NA	NA	NA	2.56	661.331	2.56	141.934	NA	NA	NA	NA	2.56	559.651	2.56	180.737	NA	NA	NA	NA	2.56	367.861	2.56	221.844	NA	NA	NA	NA	2.56	512.399	2.56	200.418	NA	NA	NA	NA	2.56	583.354	NA	NA	NA	NA	NA	NA
					42	NA	NA	NA	NA	2.624	672.81	2.624	124.551	NA	NA	NA	NA	2.624	613.822	2.624	186.093	NA	NA	NA	NA	2.624	367.714	2.624	227.698	NA	NA	NA	NA	2.624	580.684	2.624	177.1	NA	NA	NA	NA	2.624	597.67	NA	NA	NA	NA	NA	NA
					43	NA	NA	NA	NA	2.688	654.316	2.688	120.155	NA	NA	NA	NA	2.688	675.271	2.688	195.286	NA	NA	NA	NA	2.688	406.424	2.688	249.652	NA	NA	NA	NA	2.688	643.158	NA	NA	NA	NA	NA	NA	2.688	508.181	NA	NA	NA	NA	NA	NA
					44	NA	NA	NA	NA	2.752	595.416	2.752	124.983	NA	NA	NA	NA	2.752	708.534	2.752	177.273	NA	NA	NA	NA	2.752	515.602	2.752	264.806	NA	NA	NA	NA	2.752	657.699	NA	NA	NA	NA	NA	NA	2.752	411.001	NA	NA	NA	NA	NA	NA
					45	NA	NA	NA	NA	2.816	551.14	2.816	130.99	NA	NA	NA	NA	2.816	776.26	2.816	165.647	NA	NA	NA	NA	2.816	652.541	2.816	238.206	NA	NA	NA	NA	2.816	520.289	NA	NA	NA	NA	NA	NA	2.816	380.098	NA	NA	NA	NA	NA	NA
					46	NA	NA	NA	NA	2.88	478.1	2.88	140.772	NA	NA	NA	NA	2.88	848.741	2.88	181.561	NA	NA	NA	NA	2.88	701.431	2.88	196.82	NA	NA	NA	NA	2.88	419.62	NA	NA	NA	NA	NA	NA	2.88	346.379	NA	NA	NA	NA	NA	NA
					47	NA	NA	NA	NA	2.944	414.16	2.944	150.458	NA	NA	NA	NA	2.944	871.312	2.944	197.018	NA	NA	NA	NA	2.944	660.976	2.944	168.25	NA	NA	NA	NA	2.944	349.407	NA	NA	NA	NA	NA	NA	2.944	342.919	NA	NA	NA	NA	NA	NA
					48	NA	NA	NA	NA	3.008	415.14	3.008	141.77	NA	NA	NA	NA	3.008	803.556	3.008	187.963	NA	NA	NA	NA	3.008	621.044	3.008	169.32	NA	NA	NA	NA	3.008	329.606	NA	NA	NA	NA	NA	NA	3.008	359.408	NA	NA	NA	NA	NA	NA
					49	NA	NA	NA	NA	3.072	469.1	3.072	153.54	NA	NA	NA	NA	3.072	690.637	3.072	189.157	NA	NA	NA	NA	3.072	587.017	3.072	179.69	NA	NA	NA	NA	3.072	381.606	NA	NA	NA	NA	NA	NA	3.072	357.917	NA	NA	NA	NA	NA	NA
					50	NA	NA	NA	NA	3.136	542.2	3.136	162.298	NA	NA	NA	NA	3.136	537.037	NA	NA	NA	NA	NA	NA	3.136	544.388	3.136	200.96	NA	NA	NA	NA	3.136	468.974	NA	NA	NA	NA	NA	NA	3.136	345.855	NA	NA	NA	NA	NA	NA
					51	NA	NA	NA	NA	3.2	621.001	3.2	151.614	NA	NA	NA	NA	3.2	424.55	NA	NA	NA	NA	NA	NA	3.2	487.507	3.2	207.58	NA	NA	NA	NA	3.2	561.469	NA	NA	NA	NA	NA	NA	3.2	299.319	NA	NA	NA	NA	NA	NA
					52	NA	NA	NA	NA	3.264	697.348	3.264	136.371	NA	NA	NA	NA	3.264	363.08	NA	NA	NA	NA	NA	NA	3.264	461.286	3.264	198.52	NA	NA	NA	NA	3.264	690.593	NA	NA	NA	NA	NA	NA	3.264	250.825	NA	NA	NA	NA	NA	NA
					53	NA	NA	NA	NA	3.328	785.668	3.328	134.899	NA	NA	NA	NA	3.328	376.64	NA	NA	NA	NA	NA	NA	3.328	434.007	3.328	190.47	NA	NA	NA	NA	3.328	820.401	NA	NA	NA	NA	NA	NA	3.328	251.345	NA	NA	NA	NA	NA	NA
					54	NA	NA	NA	NA	3.392	885.671	NA	NA	NA	NA	NA	NA	3.392	435.62	NA	NA	NA	NA	NA	NA	3.392	368.201	3.392	185.05	NA	NA	NA	NA	3.392	895.42	NA	NA	NA	NA	NA	NA	3.392	280.163	NA	NA	NA	NA	NA	NA
					55	NA	NA	NA	NA	3.456	909.122	NA	NA	NA	NA	NA	NA	3.456	546.42	NA	NA	NA	NA	NA	NA	3.456	299.7	3.456	180.05	NA	NA	NA	NA	3.456	835.837	NA	NA	NA	NA	NA	NA	3.456	304.464	NA	NA	NA	NA	NA	NA
					56	NA	NA	NA	NA	3.52	815.287	NA	NA	NA	NA	NA	NA	3.52	656.42	NA	NA	NA	NA	NA	NA	3.52	280.582	3.52	181.37	NA	NA	NA	NA	3.52	707.061	NA	NA	NA	NA	NA	NA	3.52	308.4	NA	NA	NA	NA	NA	NA
					57	NA	NA	NA	NA	3.584	692.343	NA	NA	NA	NA	NA	NA	3.584	717.14	NA	NA	NA	NA	NA	NA	3.584	264.728	3.584	178.84	NA	NA	NA	NA	3.584	613.59	NA	NA	NA	NA	NA	NA	3.584	323.072	NA	NA	NA	NA	NA	NA
					58	NA	NA	NA	NA	3.648	632.903	NA	NA	NA	NA	NA	NA	3.648	739.06	NA	NA	NA	NA	NA	NA	3.648	259.252	3.648	185.9	NA	NA	NA	NA	3.648	550.958	NA	NA	NA	NA	NA	NA	3.648	351.848	NA	NA	NA	NA	NA	NA
					59	NA	NA	NA	NA	3.712	722.717	NA	NA	NA	NA	NA	NA	3.712	757.5	NA	NA	NA	NA	NA	NA	3.712	284.484	3.712	188	NA	NA	NA	NA	3.712	527.153	NA	NA	NA	NA	NA	NA	3.712	329.91	NA	NA	NA	NA	NA	NA
					60	NA	NA	NA	NA	3.776	858.644	NA	NA	NA	NA	NA	NA	3.776	774.94	NA	NA	NA	NA	NA	NA	3.776	319.185	3.776	196.69	NA	NA	NA	NA	3.776	488.648	NA	NA	NA	NA	NA	NA	3.776	284.828	NA	NA	NA	NA	NA	NA
					61	NA	NA	NA	NA	3.84	911.741	NA	NA	NA	NA	NA	NA	3.84	752.54	NA	NA	NA	NA	NA	NA	3.84	326.732	3.84	198.21	NA	NA	NA	NA	3.84	433.628	NA	NA	NA	NA	NA	NA	3.84	246.514	NA	NA	NA	NA	NA	NA
					62	NA	NA	NA	NA	3.904	982.243	NA	NA	NA	NA	NA	NA	3.904	722.28	NA	NA	NA	NA	NA	NA	3.904	304.602	3.904	191.68	NA	NA	NA	NA	3.904	381.525	NA	NA	NA	NA	NA	NA	3.904	226.753	NA	NA	NA	NA	NA	NA
					63	NA	NA	NA	NA	3.968	1118.85	NA	NA	NA	NA	NA	NA	3.968	771.88	NA	NA	NA	NA	NA	NA	NA	NA	3.968	193.244	NA	NA	NA	NA	3.968	349.952	NA	NA	NA	NA	NA	NA	3.968	234.636	NA	NA	NA	NA	NA	NA
					64	NA	NA	NA	NA	4.032	1357.1	NA	NA	NA	NA	NA	NA	4.032	806.92	NA	NA	NA	NA	NA	NA	NA	NA	4.032	181.706	NA	NA	NA	NA	4.032	326.686	NA	NA	NA	NA	NA	NA	4.032	288.656	NA	NA	NA	NA	NA	NA
					65	NA	NA	NA	NA	4.096	1599.6	NA	NA	NA	NA	NA	NA	NA	NA	NA	NA	NA	NA	NA	NA	NA	NA	4.096	179.653	NA	NA	NA	NA	4.096	295.646	NA	NA	NA	NA	NA	NA	4.096	354.062	NA	NA	NA	NA	NA	NA
					66	NA	NA	NA	NA	4.16	1779.7	NA	NA	NA	NA	NA	NA	NA	NA	NA	NA	NA	NA	NA	NA	NA	NA	4.16	193.481	NA	NA	NA	NA	4.16	297.654	NA	NA	NA	NA	NA	NA	4.16	441.908	NA	NA	NA	NA	NA	NA
					67	NA	NA	NA	NA	4.224	1880.7	NA	NA	NA	NA	NA	NA	NA	NA	NA	NA	NA	NA	NA	NA	NA	NA	4.224	202.859	NA	NA	NA	NA	4.224	308.279	NA	NA	NA	NA	NA	NA	4.224	544.445	NA	NA	NA	NA	NA	NA
					68	NA	NA	NA	NA	4.288	1712.7	NA	NA	NA	NA	NA	NA	NA	NA	NA	NA	NA	NA	NA	NA	NA	NA	4.288	201.771	NA	NA	NA	NA	4.288	317.58	NA	NA	NA	NA	NA	NA	4.288	654.989	NA	NA	NA	NA	NA	NA
					69	NA	NA	NA	NA	4.352	1342	NA	NA	NA	NA	NA	NA	NA	NA	NA	NA	NA	NA	NA	NA	NA	NA	4.352	204.089	NA	NA	NA	NA	4.352	329.273	NA	NA	NA	NA	NA	NA	4.352	666.856	NA	NA	NA	NA	NA	NA
					70	NA	NA	NA	NA	NA	NA	NA	NA	NA	NA	NA	NA	NA	NA	NA	NA	NA	NA	NA	NA	NA	NA	4.416	199.077	NA	NA	NA	NA	NA	NA	NA	NA	NA	NA	NA	NA	4.416	588.573	NA	NA	NA	NA	NA	NA
					71	NA	NA	NA	NA	NA	NA	NA	NA	NA	NA	NA	NA	NA	NA	NA	NA	NA	NA	NA	NA	NA	NA	4.48	216.544	NA	NA	NA	NA	NA	NA	NA	NA	NA	NA	NA	NA	4.48	514.054	NA	NA	NA	NA	NA	NA
					72	NA	NA	NA	NA	NA	NA	NA	NA	NA	NA	NA	NA	NA	NA	NA	NA	NA	NA	NA	NA	NA	NA	4.544	228.415	NA	NA	NA	NA	NA	NA	NA	NA	NA	NA	NA	NA	4.544	509.431	NA	NA	NA	NA	NA	NA
					73	NA	NA	NA	NA	NA	NA	NA	NA	NA	NA	NA	NA	NA	NA	NA	NA	NA	NA	NA	NA	NA	NA	4.608	212.022	NA	NA	NA	NA	NA	NA	NA	NA	NA	NA	NA	NA	4.608	485.963	NA	NA	NA	NA	NA	NA
					74	NA	NA	NA	NA	NA	NA	NA	NA	NA	NA	NA	NA	NA	NA	NA	NA	NA	NA	NA	NA	NA	NA	4.672	197.184	NA	NA	NA	NA	NA	NA	NA	NA	NA	NA	NA	NA	4.672	427.945	NA	NA	NA	NA	NA	NA
					75	NA	NA	NA	NA	NA	NA	NA	NA	NA	NA	NA	NA	NA	NA	NA	NA	NA	NA	NA	NA	NA	NA	4.736	199.706	NA	NA	NA	NA	NA	NA	NA	NA	NA	NA	NA	NA	4.736	425.78	NA	NA	NA	NA	NA	NA
					76	NA	NA	NA	NA	NA	NA	NA	NA	NA	NA	NA	NA	NA	NA	NA	NA	NA	NA	NA	NA	NA	NA	4.8	204.992	NA	NA	NA	NA	NA	NA	NA	NA	NA	NA	NA	NA	4.8	410.732	NA	NA	NA	NA	NA	NA
					77	NA	NA	NA	NA	NA	NA	NA	NA	NA	NA	NA	NA	NA	NA	NA	NA	NA	NA	NA	NA	NA	NA	4.864	200.383	NA	NA	NA	NA	NA	NA	NA	NA	NA	NA	NA	NA	4.864	394.59	NA	NA	NA	NA	NA	NA
					78	NA	NA	NA	NA	NA	NA	NA	NA	NA	NA	NA	NA	NA	NA	NA	NA	NA	NA	NA	NA	NA	NA	4.928	200.037	NA	NA	NA	NA	NA	NA	NA	NA	NA	NA	NA	NA	4.928	404.657	NA	NA	NA	NA	NA	NA
					79	NA	NA	NA	NA	NA	NA	NA	NA	NA	NA	NA	NA	NA	NA	NA	NA	NA	NA	NA	NA	NA	NA	4.992	210.868	NA	NA	NA	NA	NA	NA	NA	NA	NA	NA	NA	NA	4.992	429.488	NA	NA	NA	NA	NA	NA
					80	NA	NA	NA	NA	NA	NA	NA	NA	NA	NA	NA	NA	NA	NA	NA	NA	NA	NA	NA	NA	NA	NA	5.056	221.403	NA	NA	NA	NA	NA	NA	NA	NA	NA	NA	NA	NA	5.056	432.117	NA	NA	NA	NA	NA	NA
					81	NA	NA	NA	NA	NA	NA	NA	NA	NA	NA	NA	NA	NA	NA	NA	NA	NA	NA	NA	NA	NA	NA	NA	NA	NA	NA	NA	NA	NA	NA	NA	NA	NA	NA	NA	NA	5.12	449.887	NA	NA	NA	NA	NA	NA
					82	NA	NA	NA	NA	NA	NA	NA	NA	NA	NA	NA	NA	NA	NA	NA	NA	NA	NA	NA	NA	NA	NA	NA	NA	NA	NA	NA	NA	NA	NA	NA	NA	NA	NA	NA	NA	5.184	490.276	NA	NA	NA	NA	NA	NA
					83	NA	NA	NA	NA	NA	NA	NA	NA	NA	NA	NA	NA	NA	NA	NA	NA	NA	NA	NA	NA	NA	NA	NA	NA	NA	NA	NA	NA	NA	NA	NA	NA	NA	NA	NA	NA	5.248	556.132	NA	NA	NA	NA	NA	NA
					84	NA	NA	NA	NA	NA	NA	NA	NA	NA	NA	NA	NA	NA	NA	NA	NA	NA	NA	NA	NA	NA	NA	NA	NA	NA	NA	NA	NA	NA	NA	NA	NA	NA	NA	NA	NA	NA	NA	NA	NA	NA	NA	NA	NA
					85	NA	NA	NA	NA	NA	NA	NA	NA	NA	NA	NA	NA	NA	NA	NA	NA	NA	NA	NA	NA	NA	NA	NA	NA	NA	NA	NA	NA	NA	NA	NA	NA	NA	NA	NA	NA	NA	NA	NA	NA	NA	NA	NA	NA
					86	NA	NA	NA	NA	NA	NA	NA	NA	NA	NA	NA	NA	NA	NA	NA	NA	NA	NA	NA	NA	NA	NA	NA	NA	NA	NA	NA	NA	NA	NA	NA	NA	NA	NA	NA	NA	NA	NA	NA	NA	NA	NA	NA	NA
					87	NA	NA	NA	NA	NA	NA	NA	NA	NA	NA	NA	NA	NA	NA	NA	NA	NA	NA	NA	NA	NA	NA	NA	NA	NA	NA	NA	NA	NA	NA	NA	NA	NA	NA	NA	NA	NA	NA	NA	NA	NA	NA	NA	NA
					88	NA	NA	NA	NA	NA	NA	NA	NA	NA	NA	NA	NA	NA	NA	NA	NA	NA	NA	NA	NA	NA	NA	NA	NA	NA	NA	NA	NA	NA	NA	NA	NA	NA	NA	NA	NA	NA	NA	NA	NA	NA	NA	NA	NA
					89	NA	NA	NA	NA	NA	NA	NA	NA	NA	NA	NA	NA	NA	NA	NA	NA	NA	NA	NA	NA	NA	NA	NA	NA	NA	NA	NA	NA	NA	NA	NA	NA	NA	NA	NA	NA	NA	NA	NA	NA	NA	NA	NA	NA
					90	NA	NA	NA	NA	NA	NA	NA	NA	NA	NA	NA	NA	NA	NA	NA	NA	NA	NA	NA	NA	NA	NA	NA	NA	NA	NA	NA	NA	NA	NA	NA	NA	NA	NA	NA	NA	NA	NA	NA	NA	NA	NA	NA	NA
					91	NA	NA	NA	NA	NA	NA	NA	NA	NA	NA	NA	NA	NA	NA	NA	NA	NA	NA	NA	NA	NA	NA	NA	NA	NA	NA	NA	NA	NA	NA	NA	NA	NA	NA	NA	NA	NA	NA	NA	NA	NA	NA	NA	NA
					92	NA	NA	NA	NA	NA	NA	NA	NA	NA	NA	NA	NA	NA	NA	NA	NA	NA	NA	NA	NA	NA	NA	NA	NA	NA	NA	NA	NA	NA	NA	NA	NA	NA	NA	NA	NA	NA	NA	NA	NA	NA	NA	NA	NA
					93	NA	NA	NA	NA	NA	NA	NA	NA	NA	NA	NA	NA	NA	NA	NA	NA	NA	NA	NA	NA	NA	NA	NA	NA	NA	NA	NA	NA	NA	NA	NA	NA	NA	NA	NA	NA	NA	NA	NA	NA	NA	NA	NA	NA
					94	NA	NA	NA	NA	NA	NA	NA	NA	NA	NA	NA	NA	NA	NA	NA	NA	NA	NA	NA	NA	NA	NA	NA	NA	NA	NA	NA	NA	NA	NA	NA	NA	NA	NA	NA	NA	NA	NA	NA	NA	NA	NA	NA	NA
					95	NA	NA	NA	NA	NA	NA	NA	NA	NA	NA	NA	NA	NA	NA	NA	NA	NA	NA	NA	NA	NA	NA	NA	NA	NA	NA	NA	NA	NA	NA	NA	NA	NA	NA	NA	NA	NA	NA	NA	NA	NA	NA	NA	NA
					96	NA	NA	NA	NA	NA	NA	NA	NA	NA	NA	NA	NA	NA	NA	NA	NA	NA	NA	NA	NA	NA	NA	NA	NA	NA	NA	NA	NA	NA	NA	NA	NA	NA	NA	NA	NA	NA	NA	NA	NA	NA	NA	NA	NA
					97	NA	NA	NA	NA	NA	NA	NA	NA	NA	NA	NA	NA	NA	NA	NA	NA	NA	NA	NA	NA	NA	NA	NA	NA	NA	NA	NA	NA	NA	NA	NA	NA	NA	NA	NA	NA	NA	NA	NA	NA	NA	NA	NA	NA
					98	NA	NA	NA	NA	NA	NA	NA	NA	NA	NA	NA	NA	NA	NA	NA	NA	NA	NA	NA	NA	NA	NA	NA	NA	NA	NA	NA	NA	NA	NA	NA	NA	NA	NA	NA	NA	NA	NA	NA	NA	NA	NA	NA	NA
					99	NA	NA	NA	NA	NA	NA	NA	NA	NA	NA	NA	NA	NA	NA	NA	NA	NA	NA	NA	NA	NA	NA	NA	NA	NA	NA	NA	NA	NA	NA	NA	NA	NA	NA	NA	NA	NA	NA	NA	NA	NA	NA	NA	NA
					100	NA	NA	NA	NA	NA	NA	NA	NA	NA	NA	NA	NA	NA	NA	NA	NA	NA	NA	NA	NA	NA	NA	NA	NA	NA	NA	NA	NA	NA	NA	NA	NA	NA	NA	NA	NA	NA	NA	NA	NA	NA	NA	NA	NA
					101	NA	NA	NA	NA	NA	NA	NA	NA	NA	NA	NA	NA	NA	NA	NA	NA	NA	NA	NA	NA	NA	NA	NA	NA	NA	NA	NA	NA	NA	NA	NA	NA	NA	NA	NA	NA	NA	NA	NA	NA	NA	NA	NA	NA
					102	NA	NA	NA	NA	NA	NA	NA	NA	NA	NA	NA	NA	NA	NA	NA	NA	NA	NA	NA	NA	NA	NA	NA	NA	NA	NA	NA	NA	NA	NA	NA	NA	NA	NA	NA	NA	NA	NA	NA	NA	NA	NA	NA	NA
					103	NA	NA	NA	NA	NA	NA	NA	NA	NA	NA	NA	NA	NA	NA	NA	NA	NA	NA	NA	NA	NA	NA	NA	NA	NA	NA	NA	NA	NA	NA	NA	NA	NA	NA	NA	NA	NA	NA	NA	NA	NA	NA	NA	NA
					104	NA	NA	NA	NA	NA	NA	NA	NA	NA	NA	NA	NA	NA	NA	NA	NA	NA	NA	NA	NA	NA	NA	NA	NA	NA	NA	NA	NA	NA	NA	NA	NA	NA	NA	NA	NA	NA	NA	NA	NA	NA	NA	NA	NA
					105	NA	NA	NA	NA	NA	NA	NA	NA	NA	NA	NA	NA	NA	NA	NA	NA	NA	NA	NA	NA	NA	NA	NA	NA	NA	NA	NA	NA	NA	NA	NA	NA	NA	NA	NA	NA	NA	NA	NA	NA	NA	NA	NA	NA
					106	NA	NA	NA	NA	NA	NA	NA	NA	NA	NA	NA	NA	NA	NA	NA	NA	NA	NA	NA	NA	NA	NA	NA	NA	NA	NA	NA	NA	NA	NA	NA	NA	NA	NA	NA	NA	NA	NA	NA	NA	NA	NA	NA	NA
					107	NA	NA	NA	NA	NA	NA	NA	NA	NA	NA	NA	NA	NA	NA	NA	NA	NA	NA	NA	NA	NA	NA	NA	NA	NA	NA	NA	NA	NA	NA	NA	NA	NA	NA	NA	NA	NA	NA	NA	NA	NA	NA	NA	NA
					108	NA	NA	NA	NA	NA	NA	NA	NA	NA	NA	NA	NA	NA	NA	NA	NA	NA	NA	NA	NA	NA	NA	NA	NA	NA	NA	NA	NA	NA	NA	NA	NA	NA	NA	NA	NA	NA	NA	NA	NA	NA	NA	NA	NA
					109	NA	NA	NA	NA	NA	NA	NA	NA	NA	NA	NA	NA	NA	NA	NA	NA	NA	NA	NA	NA	NA	NA	NA	NA	NA	NA	NA	NA	NA	NA	NA	NA	NA	NA	NA	NA	NA	NA	NA	NA	NA	NA	NA	NA
					110	NA	NA	NA	NA	NA	NA	NA	NA	NA	NA	NA	NA	NA	NA	NA	NA	NA	NA	NA	NA	NA	NA	NA	NA	NA	NA	NA	NA	NA	NA	NA	NA	NA	NA	NA	NA	NA	NA	NA	NA	NA	NA	NA	NA
					111	NA	NA	NA	NA	NA	NA	NA	NA	NA	NA	NA	NA	NA	NA	NA	NA	NA	NA	NA	NA	NA	NA	NA	NA	NA	NA	NA	NA	NA	NA	NA	NA	NA	NA	NA	NA	NA	NA	NA	NA	NA	NA	NA	NA
					112	NA	NA	NA	NA	NA	NA	NA	NA	NA	NA	NA	NA	NA	NA	NA	NA	NA	NA	NA	NA	NA	NA	NA	NA	NA	NA	NA	NA	NA	NA	NA	NA	NA	NA	NA	NA	NA	NA	NA	NA	NA	NA	NA	NA
					113	NA	NA	NA	NA	NA	NA	NA	NA	NA	NA	NA	NA	NA	NA	NA	NA	NA	NA	NA	NA	NA	NA	NA	NA	NA	NA	NA	NA	NA	NA	NA	NA	NA	NA	NA	NA	NA	NA	NA	NA	NA	NA	NA	NA
					114	NA	NA	NA	NA	NA	NA	NA	NA	NA	NA	NA	NA	NA	NA	NA	NA	NA	NA	NA	NA	NA	NA	NA	NA	NA	NA	NA	NA	NA	NA	NA	NA	NA	NA	NA	NA	NA	NA	NA	NA	NA	NA	NA	NA
					115	NA	NA	NA	NA	NA	NA	NA	NA	NA	NA	NA	NA	NA	NA	NA	NA	NA	NA	NA	NA	NA	NA	NA	NA	NA	NA	NA	NA	NA	NA	NA	NA	NA	NA	NA	NA	NA	NA	NA	NA	NA	NA	NA	NA
					116	NA	NA	NA	NA	NA	NA	NA	NA	NA	NA	NA	NA	NA	NA	NA	NA	NA	NA	NA	NA	NA	NA	NA	NA	NA	NA	NA	NA	NA	NA	NA	NA	NA	NA	NA	NA	NA	NA	NA	NA	NA	NA	NA	NA
					117	NA	NA	NA	NA	NA	NA	NA	NA	NA	NA	NA	NA	NA	NA	NA	NA	NA	NA	NA	NA	NA	NA	NA	NA	NA	NA	NA	NA	NA	NA	NA	NA	NA	NA	NA	NA	NA	NA	NA	NA	NA	NA	NA	NA
					118	NA	NA	NA	NA	NA	NA	NA	NA	NA	NA	NA	NA	NA	NA	NA	NA	NA	NA	NA	NA	NA	NA	NA	NA	NA	NA	NA	NA	NA	NA	NA	NA	NA	NA	NA	NA	NA	NA	NA	NA	NA	NA	NA	NA
					119	NA	NA	NA	NA	NA	NA	NA	NA	NA	NA	NA	NA	NA	NA	NA	NA	NA	NA	NA	NA	NA	NA	NA	NA	NA	NA	NA	NA	NA	NA	NA	NA	NA	NA	NA	NA	NA	NA	NA	NA	NA	NA	NA	NA
					120	NA	NA	NA	NA	NA	NA	NA	NA	NA	NA	NA	NA	NA	NA	NA	NA	NA	NA	NA	NA	NA	NA	NA	NA	NA	NA	NA	NA	NA	NA	NA	NA	NA	NA	NA	NA	NA	NA	NA	NA	NA	NA	NA	NA
					121	NA	NA	NA	NA	NA	NA	NA	NA	NA	NA	NA	NA	NA	NA	NA	NA	NA	NA	NA	NA	NA	NA	NA	NA	NA	NA	NA	NA	NA	NA	NA	NA	NA	NA	NA	NA	NA	NA	NA	NA	NA	NA	NA	NA
					122	NA	NA	NA	NA	NA	NA	NA	NA	NA	NA	NA	NA	NA	NA	NA	NA	NA	NA	NA	NA	NA	NA	NA	NA	NA	NA	NA	NA	NA	NA	NA	NA	NA	NA	NA	NA	NA	NA	NA	NA	NA	NA	NA	NA
					123	NA	NA	NA	NA	NA	NA	NA	NA	NA	NA	NA	NA	NA	NA	NA	NA	NA	NA	NA	NA	NA	NA	NA	NA	NA	NA	NA	NA	NA	NA	NA	NA	NA	NA	NA	NA	NA	NA	NA	NA	NA	NA	NA	NA
					124	NA	NA	NA	NA	NA	NA	NA	NA	NA	NA	NA	NA	NA	NA	NA	NA	NA	NA	NA	NA	NA	NA	NA	NA	NA	NA	NA	NA	NA	NA	NA	NA	NA	NA	NA	NA	NA	NA	NA	NA	NA	NA	NA	NA
					125	NA	NA	NA	NA	NA	NA	NA	NA	NA	NA	NA	NA	NA	NA	NA	NA	NA	NA	NA	NA	NA	NA	NA	NA	NA	NA	NA	NA	NA	NA	NA	NA	NA	NA	NA	NA	NA	NA	NA	NA	NA	NA	NA	NA
					126	NA	NA	NA	NA	NA	NA	NA	NA	NA	NA	NA	NA	NA	NA	NA	NA	NA	NA	NA	NA	NA	NA	NA	NA	NA	NA	NA	NA	NA	NA	NA	NA	NA	NA	NA	NA	NA	NA	NA	NA	NA	NA	NA	NA
					127	NA	NA	NA	NA	NA	NA	NA	NA	NA	NA	NA	NA	NA	NA	NA	NA	NA	NA	NA	NA	NA	NA	NA	NA	NA	NA	NA	NA	NA	NA	NA	NA	NA	NA	NA	NA	NA	NA	NA	NA	NA	NA	NA	NA
					128	NA	NA	NA	NA	NA	NA	NA	NA	NA	NA	NA	NA	NA	NA	NA	NA	NA	NA	NA	NA	NA	NA	NA	NA	NA	NA	NA	NA	NA	NA	NA	NA	NA	NA	NA	NA	NA	NA	NA	NA	NA	NA	NA	NA
					129	NA	NA	NA	NA	NA	NA	NA	NA	NA	NA	NA	NA	NA	NA	NA	NA	NA	NA	NA	NA	NA	NA	NA	NA	NA	NA	NA	NA	NA	NA	NA	NA	NA	NA	NA	NA	NA	NA	NA	NA	NA	NA	NA	NA
					130	NA	NA	NA	NA	NA	NA	NA	NA	NA	NA	NA	NA	NA	NA	NA	NA	NA	NA	NA	NA	NA	NA	NA	NA	NA	NA	NA	NA	NA	NA	NA	NA	NA	NA	NA	NA	NA	NA	NA	NA	NA	NA	NA	NA
					131	NA	NA	NA	NA	NA	NA	NA	NA	NA	NA	NA	NA	NA	NA	NA	NA	NA	NA	NA	NA	NA	NA	NA	NA	NA	NA	NA	NA	NA	NA	NA	NA	NA	NA	NA	NA	NA	NA	NA	NA	NA	NA	NA	NA
					132	NA	NA	NA	NA	NA	NA	NA	NA	NA	NA	NA	NA	NA	NA	NA	NA	NA	NA	NA	NA	NA	NA	NA	NA	NA	NA	NA	NA	NA	NA	NA	NA	NA	NA	NA	NA	NA	NA	NA	NA	NA	NA	NA	NA
					133	NA	NA	NA	NA	NA	NA	NA	NA	NA	NA	NA	NA	NA	NA	NA	NA	NA	NA	NA	NA	NA	NA	NA	NA	NA	NA	NA	NA	NA	NA	NA	NA	NA	NA	NA	NA	NA	NA	NA	NA	NA	NA	NA	NA
					134	NA	NA	NA	NA	NA	NA	NA	NA	NA	NA	NA	NA	NA	NA	NA	NA	NA	NA	NA	NA	NA	NA	NA	NA	NA	NA	NA	NA	NA	NA	NA	NA	NA	NA	NA	NA	NA	NA	NA	NA	NA	NA	NA	NA
					135	NA	NA	NA	NA	NA	NA	NA	NA	NA	NA	NA	NA	NA	NA	NA	NA	NA	NA	NA	NA	NA	NA	NA	NA	NA	NA	NA	NA	NA	NA	NA	NA	NA	NA	NA	NA	NA	NA	NA	NA	NA	NA	NA	NA
					136	NA	NA	NA	NA	NA	NA	NA	NA	NA	NA	NA	NA	NA	NA	NA	NA	NA	NA	NA	NA	NA	NA	NA	NA	NA	NA	NA	NA	NA	NA	NA	NA	NA	NA	NA	NA	NA	NA	NA	NA	NA	NA	NA	NA
					137	NA	NA	NA	NA	NA	NA	NA	NA	NA	NA	NA	NA	NA	NA	NA	NA	NA	NA	NA	NA	NA	NA	NA	NA	NA	NA	NA	NA	NA	NA	NA	NA	NA	NA	NA	NA	NA	NA	NA	NA	NA	NA	NA	NA
					138	NA	NA	NA	NA	NA	NA	NA	NA	NA	NA	NA	NA	NA	NA	NA	NA	NA	NA	NA	NA	NA	NA	NA	NA	NA	NA	NA	NA	NA	NA	NA	NA	NA	NA	NA	NA	NA	NA	NA	NA	NA	NA	NA	NA
					139	NA	NA	NA	NA	NA	NA	NA	NA	NA	NA	NA	NA	NA	NA	NA	NA	NA	NA	NA	NA	NA	NA	NA	NA	NA	NA	NA	NA	NA	NA	NA	NA	NA	NA	NA	NA	NA	NA	NA	NA	NA	NA	NA	NA
					140	NA	NA	NA	NA	NA	NA	NA	NA	NA	NA	NA	NA	NA	NA	NA	NA	NA	NA	NA	NA	NA	NA	NA	NA	NA	NA	NA	NA	NA	NA	NA	NA	NA	NA	NA	NA	NA	NA	NA	NA	NA	NA	NA	NA
					141	NA	NA	NA	NA	NA	NA	NA	NA	NA	NA	NA	NA	NA	NA	NA	NA	NA	NA	NA	NA	NA	NA	NA	NA	NA	NA	NA	NA	NA	NA	NA	NA	NA	NA	NA	NA	NA	NA	NA	NA	NA	NA	NA	NA
					142	NA	NA	NA	NA	NA	NA	NA	NA	NA	NA	NA	NA	NA	NA	NA	NA	NA	NA	NA	NA	NA	NA	NA	NA	NA	NA	NA	NA	NA	NA	NA	NA	NA	NA	NA	NA	NA	NA	NA	NA	NA	NA	NA	NA
					143	NA	NA	NA	NA	NA	NA	NA	NA	NA	NA	NA	NA	NA	NA	NA	NA	NA	NA	NA	NA	NA	NA	NA	NA	NA	NA	NA	NA	NA	NA	NA	NA	NA	NA	NA	NA	NA	NA	NA	NA	NA	NA	NA	NA
					144	NA	NA	NA	NA	NA	NA	NA	NA	NA	NA	NA	NA	NA	NA	NA	NA	NA	NA	NA	NA	NA	NA	NA	NA	NA	NA	NA	NA	NA	NA	NA	NA	NA	NA	NA	NA	NA	NA	NA	NA	NA	NA	NA	NA
					145	NA	NA	NA	NA	NA	NA	NA	NA	NA	NA	NA	NA	NA	NA	NA	NA	NA	NA	NA	NA	NA	NA	NA	NA	NA	NA	NA	NA	NA	NA	NA	NA	NA	NA	NA	NA	NA	NA	NA	NA	NA	NA	NA	NA
					146	NA	NA	NA	NA	NA	NA	NA	NA	NA	NA	NA	NA	NA	NA	NA	NA	NA	NA	NA	NA	NA	NA	NA	NA	NA	NA	NA	NA	NA	NA	NA	NA	NA	NA	NA	NA	NA	NA	NA	NA	NA	NA	NA	NA
					147	NA	NA	NA	NA	NA	NA	NA	NA	NA	NA	NA	NA	NA	NA	NA	NA	NA	NA	NA	NA	NA	NA	NA	NA	NA	NA	NA	NA	NA	NA	NA	NA	NA	NA	NA	NA	NA	NA	NA	NA	NA	NA	NA	NA
					148	NA	NA	NA	NA	NA	NA	NA	NA	NA	NA	NA	NA	NA	NA	NA	NA	NA	NA	NA	NA	NA	NA	NA	NA	NA	NA	NA	NA	NA	NA	NA	NA	NA	NA	NA	NA	NA	NA	NA	NA	NA	NA	NA	NA
[truncated: 292 more columns]

## Sheet: Nup1
Nup82-GFP						1								2								3								4								5								6
						Ic				Ir		Ibg		Ic				Ir		Ibg		Ic				Ir		Ibg		Ic				Ir		Ibg		Ic				Ir		Ibg		Ic
							458.413				247.538		133.948		491.864				231.422		135.591		329.992				233.244		133.892		300.059				294.44		132.436		326.406				255.808		130.783		385.422
							324.465								356.273								196.1								167.623								195.623								256.654
	average	median	SEM	n		Relative accumulation (RA)					113.59			Relative accumulation (RA)					95.8314			Relative accumulation (RA)					99.3517			Relative accumulation (RA)					162.004			Relative accumulation (RA)					125.026			Relative accumulation (RA)
RA:	3.2807	2.76275	0.366712	24		2.85646								3.71771								1.97379								1.03468								1.56466								8.75684
	p-value
	6.33037e-14
						140925_ViySt_Nup1_02_01Crop1_merge.tifGFP_x_lc	140925_ViySt_Nup1_02_01Crop1_merge.tifGFP_y_lc	140925_ViySt_Nup1_02_01Crop1_merge.tifmCh_x_cap	140925_ViySt_Nup1_02_01Crop1_merge.tifmCh_y_cap	140925_ViySt_Nup1_02_01Crop1_merge.tifGFP_x_lr	140925_ViySt_Nup1_02_01Crop1_merge.tifGFP_y_lr	140925_ViySt_Nup1_02_01Crop1_merge.tifGFP_x_bg	140925_ViySt_Nup1_02_01Crop1_merge.tifGFP_y_bg	140925_ViySt_Nup1_02_01Crop2_merge.tifGFP_x_lc	140925_ViySt_Nup1_02_01Crop2_merge.tifGFP_y_lc	140925_ViySt_Nup1_02_01Crop2_merge.tifmCh_x_cap	140925_ViySt_Nup1_02_01Crop2_merge.tifmCh_y_cap	140925_ViySt_Nup1_02_01Crop2_merge.tifGFP_x_lr	140925_ViySt_Nup1_02_01Crop2_merge.tifGFP_y_lr	140925_ViySt_Nup1_02_01Crop2_merge.tifGFP_x_bg	140925_ViySt_Nup1_02_01Crop2_merge.tifGFP_y_bg	140925_ViySt_Nup1_02_02Crop1_merge.tifGFP_x_lc	140925_ViySt_Nup1_02_02Crop1_merge.tifGFP_y_lc	140925_ViySt_Nup1_02_02Crop1_merge.tifmCh_x_cap	140925_ViySt_Nup1_02_02Crop1_merge.tifmCh_y_cap	140925_ViySt_Nup1_02_02Crop1_merge.tifGFP_x_lr	140925_ViySt_Nup1_02_02Crop1_merge.tifGFP_y_lr	140925_ViySt_Nup1_02_02Crop1_merge.tifGFP_x_bg	140925_ViySt_Nup1_02_02Crop1_merge.tifGFP_y_bg	140925_ViySt_Nup1_02_02Crop2_merge.tifGFP_x_lc	140925_ViySt_Nup1_02_02Crop2_merge.tifGFP_y_lc	140925_ViySt_Nup1_02_02Crop2_merge.tifmCh_x_cap	140925_ViySt_Nup1_02_02Crop2_merge.tifmCh_y_cap	140925_ViySt_Nup1_02_02Crop2_merge.tifGFP_x_lr	140925_ViySt_Nup1_02_02Crop2_merge.tifGFP_y_lr	140925_ViySt_Nup1_02_02Crop2_merge.tifGFP_x_bg	140925_ViySt_Nup1_02_02Crop2_merge.tifGFP_y_bg	140925_ViySt_Nup1_02_02Crop3_merge.tifGFP_x_lc	140925_ViySt_Nup1_02_02Crop3_merge.tifGFP_y_lc	140925_ViySt_Nup1_02_02Crop3_merge.tifmCh_x_cap	140925_ViySt_Nup1_02_02Crop3_merge.tifmCh_y_cap	140925_ViySt_Nup1_02_02Crop3_merge.tifGFP_x_lr	140925_ViySt_Nup1_02_02Crop3_merge.tifGFP_y_lr	140925_ViySt_Nup1_02_02Crop3_merge.tifGFP_x_bg	140925_ViySt_Nup1_02_02Crop3_merge.tifGFP_y_bg	140925_ViySt_Nup1_02_03Crop1_merge.tifGFP_x_lc	140925_ViySt_Nup1_02_03Crop1_merge.tifGFP_y_lc	140925_ViySt_Nup1_02_03Crop1_merge.tifmCh_x_cap	140925_ViySt_Nup1_02_03Crop1_merge.tifmCh_y_cap
					1	0	336	0	652	0	174	0	143	0	315	0	342	0	211	0	113	0	483	0	72	0	227	0	139	0	295	0	129	0	255	0	156	0	208	0	181	0	242	0	144	0	183	0	236
					2	0.064	350.392	0.064	1087.03	0.064	200.923	0.064	144.496	0.064	398.164	0.064	644.729	0.064	227.2	0.064	127.739	0.064	385.085	0.064	76.803	0.064	207.543	0.064	134.924	0.064	255	0.064	135	0.064	259.197	0.064	144.245	0.064	234.438	0.064	361.052	0.064	201	0.064	149.896	0.064	223.745	0.064	357
					3	0.128	393.282	0.128	1481.62	0.128	212.466	0.128	135.049	0.128	533.204	0.128	1034.3	0.128	227.16	0.128	135.379	0.128	319.228	0.128	96.127	0.128	199.244	0.128	138.874	0.128	218	0.128	137	0.128	259.428	0.128	134.782	0.128	267.999	0.128	643.654	0.128	169	0.128	138.577	0.128	281.344	0.128	476
					4	0.192	431.845	0.192	1735.78	0.192	206.363	0.192	129.116	0.192	615.369	0.192	1293.61	0.192	241.08	0.192	135.569	0.192	278.249	0.192	129.915	0.192	203.339	0.192	150.992	0.192	240	0.192	174	0.192	265.096	0.192	125.022	0.192	307.134	0.192	1023.37	0.192	154	0.192	136.015	0.192	335.934	0.192	571
					5	0.256	434.702	0.256	1848.23	0.256	202.048	0.256	127.854	0.256	633.038	0.256	1238.61	0.256	247.4	0.256	149.934	0.256	275.557	0.256	174.147	0.256	212.04	0.256	150.279	0.256	268	0.256	220	0.256	255.709	0.256	125.494	0.256	371.872	0.256	1535.86	0.256	146	0.256	143.894	0.256	377.872	0.256	664
					6	0.32	455.14	0.32	1931.7	0.32	216.023	0.32	124.051	0.32	635.133	0.32	1100.94	0.32	223	0.32	142.417	0.32	294.449	0.32	227.003	0.32	222.274	0.32	140.869	0.32	271	0.32	277	0.32	281.21	0.32	128.023	0.32	409.378	0.32	1858.8	0.32	151	0.32	142.293	0.32	416.354	0.32	789
					7	0.384	456.74	0.384	1821.5	0.384	209.064	0.384	127.934	0.384	606.388	0.384	1047.68	0.384	199.16	0.384	127.683	0.384	312.475	0.384	290.266	0.384	242.919	0.384	140.602	0.384	254	0.384	342	0.384	293.91	0.384	128.595	0.384	399.271	0.384	2097.29	0.384	175	0.384	135.155	0.384	396.281	0.384	837
					8	0.448	444.537	0.448	1629.01	0.448	207.404	0.448	139.004	0.448	574.503	0.448	1044.44	0.448	208.4	0.448	124.354	0.448	319.729	0.448	350.67	0.448	286.76	0.448	136.636	0.448	258	0.448	398	0.448	285.915	0.448	134.756	0.448	401.049	0.448	2388.79	0.448	229	0.448	128.986	0.448	381.315	0.448	891.948
					9	0.512	413.554	0.512	1508.02	0.512	208.692	0.512	142.529	0.512	519.292	0.512	1151.28	0.512	218.88	0.512	129.518	0.512	323.151	0.512	420.963	0.512	342.232	0.512	138.944	0.512	258.48	0.512	487.28	0.512	293.081	0.512	132.346	0.512	391.419	0.512	2636.97	0.512	282	0.512	129.637	0.512	474.792	0.512	947.732
					10	0.576	338.117	0.576	1379.63	0.576	226.268	0.576	133.58	0.576	476.188	0.576	1247.02	0.576	222.56	0.576	133.905	0.576	313.029	0.576	467.76	0.576	373.19	0.576	130.798	0.576	266.24	0.576	578.6	0.576	289.45	0.576	131.893	0.576	355.291	0.576	2618.19	0.576	305	0.576	120.782	0.576	517.639	0.576	896.438
					11	0.64	274.343	0.64	1137.09	0.64	256.25	0.64	120.365	0.64	476.03	0.64	1273.62	0.64	231	0.64	144.416	0.64	303.624	0.64	519.213	0.64	377.885	0.64	130.673	0.64	267.8	0.64	633.68	0.64	281.7	0.64	141.736	0.64	329.916	0.64	2646.53	0.64	295	0.64	118.453	0.64	516.982	0.64	669.036
					12	0.704	249.864	0.704	793.729	0.704	273.294	0.704	123.042	0.704	483.463	0.704	1190.4	0.704	232.335	0.704	151.077	0.704	327.544	0.704	567.844	0.704	360.378	0.704	135.963	0.704	267.64	0.704	597.08	0.704	280.05	0.704	146.189	0.704	301.081	0.704	2660.24	0.704	306	0.704	132.733	0.704	509.643	0.704	451.008
					13	0.768	234.563	0.768	542.521	0.768	276.403	0.768	125.953	0.768	488.382	0.768	1018.62	0.768	230.353	0.768	144.384	0.768	380.607	0.768	711.223	0.768	327.833	0.768	144.279	0.768	281	0.768	513	0.768	269.05	0.768	130.863	0.768	311.486	0.768	2728.93	0.768	299.481	0.768	159.813	0.768	470.368	0.768	297.38
					14	0.832	244.244	0.832	374.671	0.832	288.455	0.832	126.738	0.832	434.541	0.832	689.34	0.832	226.996	0.832	136.816	0.832	398.059	0.832	883.091	0.832	284.785	0.832	146.268	0.832	330.74	0.832	404.315	0.832	264.35	0.832	125.833	0.832	305.857	0.832	2773.89	0.832	301.334	0.832	140.514	0.832	384.602	0.832	162.554
					15	0.896	355.467	0.896	261.923	0.896	283.426	0.896	142.309	0.896	453.947	0.896	374.78	0.896	235.864	0.896	122.652	0.896	358.43	0.896	980.915	0.896	265.006	0.896	142.798	0.896	386.554	0.896	292.437	0.896	242.525	0.896	122.212	0.896	300.881	0.896	2719.61	0.896	314.397	0.896	126.957	0.896	311.453	0.896	107.356
					16	0.96	567.148	0.96	169.779	0.96	282.64	0.96	151.731	0.96	483.007	0.96	198.08	0.96	248.631	0.96	128.396	0.96	328.938	0.96	993.635	0.96	256.362	0.96	144.062	0.96	445.331	0.96	204.425	0.96	195.755	0.96	124.669	0.96	312.635	0.96	2722.84	0.96	316.467	0.96	128.849	NA	NA	NA	NA
					17	1.024	797.747	1.024	125.655	1.024	278.435	1.024	144.696	1.024	509.479	1.024	112.8	1.024	241.404	1.024	138.112	1.024	297.632	1.024	904.279	1.024	252.77	1.024	140.195	1.024	445.642	1.024	160.738	1.024	160.716	1.024	133.182	1.024	315.291	1.024	2714.78	1.024	321.606	1.024	127.703	NA	NA	NA	NA
					18	1.088	945.907	1.088	113.562	1.088	285.171	1.088	139.292	1.088	472.832	1.088	65.7	1.088	257.142	1.088	138.337	1.088	255.206	1.088	773.771	1.088	253.574	1.088	132.135	1.088	369.063	1.088	138.838	1.088	151.238	1.088	135.664	1.088	309.191	1.088	2686.53	1.088	306.948	1.088	127.588	NA	NA	NA	NA
					19	1.152	897.352	1.152	114.24	1.152	309.893	1.152	137.262	1.152	412.582	1.152	48.9	1.152	289.481	1.152	136.526	1.152	225.959	1.152	561.974	1.152	231.311	1.152	124.387	1.152	306.3	1.152	142.64	1.152	151.378	1.152	130.191	1.152	320.226	1.152	2548.14	1.152	271.168	1.152	126.244	NA	NA	NA	NA
					20	1.216	748.133	1.216	118.445	1.216	357.254	1.216	138.94	1.216	316.737	NA	NA	1.216	296.405	1.216	137.043	1.216	216.645	1.216	389.966	1.216	197.724	1.216	121.44	1.216	317.38	1.216	147.58	1.216	152.579	1.216	125.686	1.216	339.84	1.216	2260.17	1.216	288.232	1.216	119.169	NA	NA	NA	NA
					21	1.28	797.726	NA	NA	1.28	369.881	1.28	146.621	NA	NA	NA	NA	1.28	266.927	1.28	118.947	1.28	219.584	1.28	309.651	1.28	159.99	1.28	122.452	NA	NA	NA	NA	1.28	153.991	1.28	119.178	1.28	344.751	1.28	1838.93	1.28	290.605	1.28	115.036	NA	NA	NA	NA
					22	1.344	825.474	NA	NA	1.344	377.044	1.344	141.746	NA	NA	NA	NA	1.344	226.597	1.344	118.318	1.344	254.275	1.344	247.409	1.344	156.2	1.344	127.261	NA	NA	NA	NA	1.344	155.374	1.344	125.879	1.344	353.648	1.344	1309.33	1.344	277.798	1.344	110.875	NA	NA	NA	NA
					23	1.408	773.55	NA	NA	1.408	326.822	1.408	131.413	NA	NA	NA	NA	1.408	220.039	1.408	123.905	1.408	294.703	1.408	198.8	1.408	172.616	1.408	143.952	NA	NA	NA	NA	1.408	159.508	1.408	141.236	1.408	338.21	1.408	828.63	1.408	282.532	1.408	113.508	NA	NA	NA	NA
					24	1.472	707.256	NA	NA	1.472	301.427	1.472	135.205	NA	NA	NA	NA	1.472	232.012	1.472	125.938	1.472	378.993	NA	NA	1.472	176.375	1.472	156.892	NA	NA	NA	NA	1.472	172.369	1.472	151.142	1.472	304.87	1.472	480.72	1.472	284.871	1.472	127.842	NA	NA	NA	NA
					25	1.536	612.789	NA	NA	1.536	277.014	1.536	138.3	NA	NA	NA	NA	1.536	253.333	1.536	124.636	1.536	501.684	NA	NA	1.536	182.748	1.536	144.248	NA	NA	NA	NA	1.536	197.586	1.536	151.709	NA	NA	1.536	260.9	1.536	261.792	1.536	134.079	NA	NA	NA	NA
					26	1.6	492.641	NA	NA	1.6	269.438	1.6	132.166	NA	NA	NA	NA	1.6	274.639	1.6	127.397	1.6	533.955	NA	NA	1.6	193.426	1.6	142.673	NA	NA	NA	NA	1.6	229.469	1.6	143.273	NA	NA	1.6	138.6	1.6	238.16	1.6	133.403	NA	NA	NA	NA
					27	1.664	355.347	NA	NA	1.664	261.642	1.664	124.53	NA	NA	NA	NA	1.664	276.824	1.664	128.039	NA	NA	NA	NA	1.664	209.431	1.664	142.81	NA	NA	NA	NA	1.664	256.364	1.664	130.669	NA	NA	NA	NA	1.664	222.639	1.664	141.604	NA	NA	NA	NA
					28	1.728	241.918	NA	NA	1.728	285.444	1.728	113.839	NA	NA	NA	NA	1.728	273.147	1.728	131.292	NA	NA	NA	NA	1.728	223.666	1.728	136.111	NA	NA	NA	NA	1.728	269.778	1.728	125.18	NA	NA	NA	NA	1.728	213.545	1.728	139.856	NA	NA	NA	NA
					29	1.792	178.341	NA	NA	1.792	322.479	1.792	125.321	NA	NA	NA	NA	1.792	271.145	1.792	134.88	NA	NA	NA	NA	1.792	222.414	1.792	140.763	NA	NA	NA	NA	1.792	289.717	1.792	128.107	NA	NA	NA	NA	1.792	226.142	1.792	136.043	NA	NA	NA	NA
					30	1.856	163.778	NA	NA	1.856	347.765	1.856	139.974	NA	NA	NA	NA	1.856	275.968	1.856	147.335	NA	NA	NA	NA	1.856	210.237	1.856	145.642	NA	NA	NA	NA	1.856	310.742	1.856	136.003	NA	NA	NA	NA	1.856	255.412	1.856	133.569	NA	NA	NA	NA
					31	1.92	165.861	NA	NA	1.92	385.237	1.92	134.509	NA	NA	NA	NA	1.92	260.45	1.92	149.602	NA	NA	NA	NA	1.92	208.995	1.92	153.571	NA	NA	NA	NA	1.92	313.682	1.92	139.101	NA	NA	NA	NA	1.92	265.165	1.92	124.286	NA	NA	NA	NA
					32	1.984	189.295	NA	NA	1.984	430.081	1.984	133.932	NA	NA	NA	NA	1.984	272.49	1.984	141.497	NA	NA	NA	NA	1.984	212.253	1.984	150.811	NA	NA	NA	NA	1.984	299.807	1.984	136.16	NA	NA	NA	NA	1.984	243.841	1.984	119.503	NA	NA	NA	NA
					33	2.048	254.579	NA	NA	2.048	430.23	2.048	134.158	NA	NA	NA	NA	2.048	319.267	2.048	135.775	NA	NA	NA	NA	2.048	193.656	2.048	136.399	NA	NA	NA	NA	2.048	269.243	2.048	131.43	NA	NA	NA	NA	2.048	228.288	2.048	123.732	NA	NA	NA	NA
					34	NA	NA	NA	NA	2.112	401.512	2.112	139.376	NA	NA	NA	NA	2.112	315.657	2.112	129.228	NA	NA	NA	NA	2.112	187.306	2.112	121.605	NA	NA	NA	NA	2.112	241.621	2.112	136.905	NA	NA	NA	NA	2.112	222.795	2.112	125.397	NA	NA	NA	NA
					35	NA	NA	NA	NA	2.176	366.968	2.176	142.238	NA	NA	NA	NA	2.176	274.615	2.176	127.9	NA	NA	NA	NA	2.176	195.44	2.176	118.915	NA	NA	NA	NA	2.176	233.816	2.176	145.963	NA	NA	NA	NA	2.176	219.249	2.176	125.024	NA	NA	NA	NA
					36	NA	NA	NA	NA	2.24	357.112	2.24	138.578	NA	NA	NA	NA	2.24	254.803	2.24	130.493	NA	NA	NA	NA	2.24	209.729	2.24	122.467	NA	NA	NA	NA	2.24	233.967	2.24	132.867	NA	NA	NA	NA	2.24	223.689	2.24	126.652	NA	NA	NA	NA
					37	NA	NA	NA	NA	2.304	332.53	2.304	132.791	NA	NA	NA	NA	2.304	266.722	2.304	143.743	NA	NA	NA	NA	2.304	214.558	2.304	125.683	NA	NA	NA	NA	2.304	242.321	2.304	122.387	NA	NA	NA	NA	2.304	250.64	2.304	135.887	NA	NA	NA	NA
					38	NA	NA	NA	NA	2.368	279.238	2.368	136.338	NA	NA	NA	NA	2.368	248.63	2.368	148.006	NA	NA	NA	NA	2.368	200.787	2.368	129.078	NA	NA	NA	NA	2.368	274.207	2.368	117.222	NA	NA	NA	NA	2.368	286.562	2.368	147.089	NA	NA	NA	NA
					39	NA	NA	NA	NA	2.432	241.05	2.432	139.789	NA	NA	NA	NA	2.432	213.859	2.432	138.532	NA	NA	NA	NA	2.432	200.207	2.432	130.501	NA	NA	NA	NA	2.432	329.321	2.432	123.888	NA	NA	NA	NA	2.432	290.916	2.432	148.922	NA	NA	NA	NA
					40	NA	NA	NA	NA	2.496	223.014	2.496	136.074	NA	NA	NA	NA	2.496	199.498	2.496	137.265	NA	NA	NA	NA	2.496	216.78	2.496	134.684	NA	NA	NA	NA	2.496	375.455	2.496	130.825	NA	NA	NA	NA	2.496	280.377	2.496	140.824	NA	NA	NA	NA
					41	NA	NA	NA	NA	2.56	234.753	2.56	137.058	NA	NA	NA	NA	2.56	210.741	2.56	131.694	NA	NA	NA	NA	2.56	219.765	2.56	138.778	NA	NA	NA	NA	2.56	387.787	2.56	134.281	NA	NA	NA	NA	2.56	299.256	2.56	123.183	NA	NA	NA	NA
					42	NA	NA	NA	NA	2.624	222.57	2.624	140.775	NA	NA	NA	NA	2.624	213.346	2.624	124.889	NA	NA	NA	NA	2.624	210.694	2.624	146.528	NA	NA	NA	NA	2.624	377.491	2.624	138.494	NA	NA	NA	NA	2.624	294.991	2.624	117.984	NA	NA	NA	NA
					43	NA	NA	NA	NA	2.688	200.628	2.688	144.345	NA	NA	NA	NA	2.688	206.524	2.688	136.08	NA	NA	NA	NA	2.688	212.067	2.688	131.242	NA	NA	NA	NA	2.688	360.828	2.688	133.464	NA	NA	NA	NA	2.688	261.087	2.688	116.211	NA	NA	NA	NA
					44	NA	NA	NA	NA	2.752	176.413	2.752	146.253	NA	NA	NA	NA	2.752	213.412	2.752	146.614	NA	NA	NA	NA	2.752	229.489	2.752	126.226	NA	NA	NA	NA	2.752	351.102	2.752	127.694	NA	NA	NA	NA	2.752	262.244	2.752	113.406	NA	NA	NA	NA
					45	NA	NA	NA	NA	2.816	168.583	2.816	138.204	NA	NA	NA	NA	2.816	208.116	2.816	154.672	NA	NA	NA	NA	2.816	242.982	2.816	130.572	NA	NA	NA	NA	2.816	340.332	2.816	133.061	NA	NA	NA	NA	2.816	302.594	2.816	132.916	NA	NA	NA	NA
					46	NA	NA	NA	NA	2.88	174.162	2.88	129.66	NA	NA	NA	NA	2.88	178.932	2.88	149.219	NA	NA	NA	NA	2.88	247.691	2.88	132.358	NA	NA	NA	NA	2.88	331.135	2.88	121.376	NA	NA	NA	NA	2.88	282.775	2.88	137.931	NA	NA	NA	NA
					47	NA	NA	NA	NA	2.944	170.09	2.944	126.791	NA	NA	NA	NA	2.944	169.646	2.944	141.23	NA	NA	NA	NA	2.944	269.348	2.944	140.55	NA	NA	NA	NA	2.944	332.454	2.944	114.541	NA	NA	NA	NA	2.944	234.522	2.944	139.833	NA	NA	NA	NA
					48	NA	NA	NA	NA	3.008	160.167	3.008	134.265	NA	NA	NA	NA	3.008	184.972	3.008	137.151	NA	NA	NA	NA	3.008	303.467	3.008	141.853	NA	NA	NA	NA	3.008	355.982	3.008	122.724	NA	NA	NA	NA	3.008	208.156	3.008	144.405	NA	NA	NA	NA
					49	NA	NA	NA	NA	3.072	158.729	3.072	144.757	NA	NA	NA	NA	3.072	180.332	3.072	140.458	NA	NA	NA	NA	3.072	298.02	3.072	145.06	NA	NA	NA	NA	3.072	382.128	3.072	133.692	NA	NA	NA	NA	3.072	215.949	3.072	136.402	NA	NA	NA	NA
					50	NA	NA	NA	NA	3.136	155.973	3.136	145.71	NA	NA	NA	NA	3.136	161.927	3.136	136.256	NA	NA	NA	NA	3.136	282.68	3.136	132.576	NA	NA	NA	NA	3.136	407.181	3.136	134.211	NA	NA	NA	NA	3.136	252.379	3.136	127.472	NA	NA	NA	NA
					51	NA	NA	NA	NA	3.2	161.369	3.2	134.358	NA	NA	NA	NA	3.2	150.163	3.2	131.974	NA	NA	NA	NA	3.2	267.08	3.2	120.722	NA	NA	NA	NA	3.2	417.763	3.2	132.138	NA	NA	NA	NA	3.2	274.249	3.2	121.718	NA	NA	NA	NA
					52	NA	NA	NA	NA	3.264	179.01	3.264	121.878	NA	NA	NA	NA	3.264	146.309	3.264	140.096	NA	NA	NA	NA	3.264	240.76	3.264	128.572	NA	NA	NA	NA	3.264	411.423	3.264	132.999	NA	NA	NA	NA	3.264	288.815	3.264	124.901	NA	NA	NA	NA
					53	NA	NA	NA	NA	3.328	181.21	3.328	124.357	NA	NA	NA	NA	3.328	142.128	3.328	147.138	NA	NA	NA	NA	3.328	220.3	3.328	138.839	NA	NA	NA	NA	3.328	425.203	3.328	129.359	NA	NA	NA	NA	3.328	291.412	3.328	125.782	NA	NA	NA	NA
					54	NA	NA	NA	NA	3.392	178.928	3.392	123.518	NA	NA	NA	NA	3.392	157.009	3.392	153.849	NA	NA	NA	NA	3.392	215.74	3.392	143.129	NA	NA	NA	NA	3.392	457.547	3.392	131.326	NA	NA	NA	NA	3.392	284.97	3.392	128.111	NA	NA	NA	NA
					55	NA	NA	NA	NA	3.456	188.931	3.456	126.345	NA	NA	NA	NA	3.456	168.977	3.456	154.63	NA	NA	NA	NA	3.456	231.5	3.456	145.83	NA	NA	NA	NA	3.456	520.752	3.456	149.013	NA	NA	NA	NA	3.456	295.555	3.456	131.551	NA	NA	NA	NA
					56	NA	NA	NA	NA	3.52	174.828	3.52	132.789	NA	NA	NA	NA	3.52	182.535	3.52	141.583	NA	NA	NA	NA	3.52	253.896	3.52	143.509	NA	NA	NA	NA	3.52	528.78	3.52	147.044	NA	NA	NA	NA	3.52	312.002	3.52	128.775	NA	NA	NA	NA
					57	NA	NA	NA	NA	3.584	181.19	3.584	125.997	NA	NA	NA	NA	3.584	178.287	3.584	132.199	NA	NA	NA	NA	3.584	259.049	3.584	144.764	NA	NA	NA	NA	3.584	476.743	3.584	137.161	NA	NA	NA	NA	3.584	305.267	3.584	127.682	NA	NA	NA	NA
					58	NA	NA	NA	NA	3.648	209.3	3.648	125.893	NA	NA	NA	NA	3.648	171.687	3.648	125.314	NA	NA	NA	NA	3.648	236.602	3.648	140.698	NA	NA	NA	NA	3.648	449.828	3.648	129.23	NA	NA	NA	NA	3.648	274.086	3.648	126.749	NA	NA	NA	NA
					59	NA	NA	NA	NA	3.712	223.83	3.712	135	NA	NA	NA	NA	3.712	188.421	3.712	135.561	NA	NA	NA	NA	3.712	220.645	3.712	134.04	NA	NA	NA	NA	3.712	417.968	3.712	127.244	NA	NA	NA	NA	3.712	241.47	NA	NA	NA	NA	NA	NA
					60	NA	NA	NA	NA	3.776	192.24	3.776	132.207	NA	NA	NA	NA	3.776	211.861	3.776	133.753	NA	NA	NA	NA	3.776	220.574	3.776	126.769	NA	NA	NA	NA	3.776	387.428	3.776	140.413	NA	NA	NA	NA	3.776	236.774	NA	NA	NA	NA	NA	NA
					61	NA	NA	NA	NA	3.84	188.09	3.84	127.521	NA	NA	NA	NA	3.84	229.162	3.84	131.88	NA	NA	NA	NA	3.84	213.891	3.84	115.574	NA	NA	NA	NA	3.84	364.4	3.84	141.024	NA	NA	NA	NA	3.84	234.348	NA	NA	NA	NA	NA	NA
					62	NA	NA	NA	NA	3.904	199.83	3.904	123.332	NA	NA	NA	NA	3.904	244.005	3.904	137.02	NA	NA	NA	NA	3.904	203.984	3.904	107.948	NA	NA	NA	NA	3.904	356.58	3.904	142.78	NA	NA	NA	NA	3.904	213.036	NA	NA	NA	NA	NA	NA
					63	NA	NA	NA	NA	3.968	190.99	3.968	123.903	NA	NA	NA	NA	3.968	234.455	3.968	138.96	NA	NA	NA	NA	3.968	188.759	3.968	111.106	NA	NA	NA	NA	3.968	352.36	3.968	134.865	NA	NA	NA	NA	3.968	192.595	NA	NA	NA	NA	NA	NA
					64	NA	NA	NA	NA	4.032	169.07	NA	NA	NA	NA	NA	NA	4.032	214.648	4.032	135.08	NA	NA	NA	NA	4.032	167.635	4.032	123.413	NA	NA	NA	NA	4.032	319.42	4.032	128.933	NA	NA	NA	NA	4.032	173.549	NA	NA	NA	NA	NA	NA
					65	NA	NA	NA	NA	4.096	190	NA	NA	NA	NA	NA	NA	4.096	205.099	4.096	143.07	NA	NA	NA	NA	NA	NA	4.096	135.057	NA	NA	NA	NA	4.096	275.96	4.096	121.767	NA	NA	NA	NA	NA	NA	NA	NA	NA	NA	NA	NA
					66	NA	NA	NA	NA	4.16	214.804	NA	NA	NA	NA	NA	NA	4.16	226.363	4.16	149.77	NA	NA	NA	NA	NA	NA	4.16	140.413	NA	NA	NA	NA	4.16	258.26	4.16	125.957	NA	NA	NA	NA	NA	NA	NA	NA	NA	NA	NA	NA
					67	NA	NA	NA	NA	4.224	243.443	NA	NA	NA	NA	NA	NA	4.224	258.154	4.224	126.87	NA	NA	NA	NA	NA	NA	4.224	137.748	NA	NA	NA	NA	4.224	241.34	4.224	128.888	NA	NA	NA	NA	NA	NA	NA	NA	NA	NA	NA	NA
					68	NA	NA	NA	NA	4.288	273.718	NA	NA	NA	NA	NA	NA	4.288	283.255	4.288	114.08	NA	NA	NA	NA	NA	NA	4.288	132.377	NA	NA	NA	NA	4.288	206.8	4.288	125.097	NA	NA	NA	NA	NA	NA	NA	NA	NA	NA	NA	NA
					69	NA	NA	NA	NA	4.352	254.436	NA	NA	NA	NA	NA	NA	4.352	279.728	4.352	122.16	NA	NA	NA	NA	NA	NA	4.352	135.428	NA	NA	NA	NA	4.352	176.66	4.352	126.3	NA	NA	NA	NA	NA	NA	NA	NA	NA	NA	NA	NA
					70	NA	NA	NA	NA	4.416	242.454	NA	NA	NA	NA	NA	NA	4.416	244.825	4.416	138.14	NA	NA	NA	NA	NA	NA	4.416	133.994	NA	NA	NA	NA	4.416	169.9	4.416	125.967	NA	NA	NA	NA	NA	NA	NA	NA	NA	NA	NA	NA
					71	NA	NA	NA	NA	4.48	243.131	NA	NA	NA	NA	NA	NA	4.48	234.219	NA	NA	NA	NA	NA	NA	NA	NA	4.48	121.916	NA	NA	NA	NA	4.48	156.92	4.48	125.399	NA	NA	NA	NA	NA	NA	NA	NA	NA	NA	NA	NA
					72	NA	NA	NA	NA	4.544	251.679	NA	NA	NA	NA	NA	NA	4.544	236.642	NA	NA	NA	NA	NA	NA	NA	NA	4.544	113.117	NA	NA	NA	NA	4.544	147.782	NA	NA	NA	NA	NA	NA	NA	NA	NA	NA	NA	NA	NA	NA
					73	NA	NA	NA	NA	4.608	249.721	NA	NA	NA	NA	NA	NA	4.608	254.562	NA	NA	NA	NA	NA	NA	NA	NA	4.608	121.769	NA	NA	NA	NA	4.608	151.775	NA	NA	NA	NA	NA	NA	NA	NA	NA	NA	NA	NA	NA	NA
					74	NA	NA	NA	NA	4.672	255.297	NA	NA	NA	NA	NA	NA	4.672	265.053	NA	NA	NA	NA	NA	NA	NA	NA	4.672	123.931	NA	NA	NA	NA	4.672	158.426	NA	NA	NA	NA	NA	NA	NA	NA	NA	NA	NA	NA	NA	NA
					75	NA	NA	NA	NA	4.736	277.584	NA	NA	NA	NA	NA	NA	4.736	269.757	NA	NA	NA	NA	NA	NA	NA	NA	4.736	123.309	NA	NA	NA	NA	4.736	166.1	NA	NA	NA	NA	NA	NA	NA	NA	NA	NA	NA	NA	NA	NA
					76	NA	NA	NA	NA	4.8	326.576	NA	NA	NA	NA	NA	NA	4.8	300.341	NA	NA	NA	NA	NA	NA	NA	NA	4.8	125.192	NA	NA	NA	NA	4.8	211.657	NA	NA	NA	NA	NA	NA	NA	NA	NA	NA	NA	NA	NA	NA
					77	NA	NA	NA	NA	4.864	314.98	NA	NA	NA	NA	NA	NA	4.864	301.864	NA	NA	NA	NA	NA	NA	NA	NA	4.864	128.296	NA	NA	NA	NA	4.864	302.507	NA	NA	NA	NA	NA	NA	NA	NA	NA	NA	NA	NA	NA	NA
					78	NA	NA	NA	NA	4.928	259.217	NA	NA	NA	NA	NA	NA	NA	NA	NA	NA	NA	NA	NA	NA	NA	NA	4.928	133.894	NA	NA	NA	NA	4.928	320.303	NA	NA	NA	NA	NA	NA	NA	NA	NA	NA	NA	NA	NA	NA
					79	NA	NA	NA	NA	4.992	227.366	NA	NA	NA	NA	NA	NA	NA	NA	NA	NA	NA	NA	NA	NA	NA	NA	4.992	132.49	NA	NA	NA	NA	4.992	322.233	NA	NA	NA	NA	NA	NA	NA	NA	NA	NA	NA	NA	NA	NA
					80	NA	NA	NA	NA	5.056	212.636	NA	NA	NA	NA	NA	NA	NA	NA	NA	NA	NA	NA	NA	NA	NA	NA	5.056	125.394	NA	NA	NA	NA	5.056	320.809	NA	NA	NA	NA	NA	NA	NA	NA	NA	NA	NA	NA	NA	NA
					81	NA	NA	NA	NA	5.12	191.523	NA	NA	NA	NA	NA	NA	NA	NA	NA	NA	NA	NA	NA	NA	NA	NA	5.12	118.055	NA	NA	NA	NA	5.12	339.14	NA	NA	NA	NA	NA	NA	NA	NA	NA	NA	NA	NA	NA	NA
					82	NA	NA	NA	NA	5.184	174.766	NA	NA	NA	NA	NA	NA	NA	NA	NA	NA	NA	NA	NA	NA	NA	NA	5.184	122.867	NA	NA	NA	NA	5.184	393.83	NA	NA	NA	NA	NA	NA	NA	NA	NA	NA	NA	NA	NA	NA
					83	NA	NA	NA	NA	5.248	182.024	NA	NA	NA	NA	NA	NA	NA	NA	NA	NA	NA	NA	NA	NA	NA	NA	5.248	126.505	NA	NA	NA	NA	5.248	407.78	NA	NA	NA	NA	NA	NA	NA	NA	NA	NA	NA	NA	NA	NA
					84	NA	NA	NA	NA	5.312	216.195	NA	NA	NA	NA	NA	NA	NA	NA	NA	NA	NA	NA	NA	NA	NA	NA	NA	NA	NA	NA	NA	NA	5.312	383.98	NA	NA	NA	NA	NA	NA	NA	NA	NA	NA	NA	NA	NA	NA
					85	NA	NA	NA	NA	5.376	239.714	NA	NA	NA	NA	NA	NA	NA	NA	NA	NA	NA	NA	NA	NA	NA	NA	NA	NA	NA	NA	NA	NA	5.376	351.78	NA	NA	NA	NA	NA	NA	NA	NA	NA	NA	NA	NA	NA	NA
					86	NA	NA	NA	NA	5.44	265.734	NA	NA	NA	NA	NA	NA	NA	NA	NA	NA	NA	NA	NA	NA	NA	NA	NA	NA	NA	NA	NA	NA	5.44	339.396	NA	NA	NA	NA	NA	NA	NA	NA	NA	NA	NA	NA	NA	NA
					87	NA	NA	NA	NA	NA	NA	NA	NA	NA	NA	NA	NA	NA	NA	NA	NA	NA	NA	NA	NA	NA	NA	NA	NA	NA	NA	NA	NA	5.504	325.13	NA	NA	NA	NA	NA	NA	NA	NA	NA	NA	NA	NA	NA	NA
					88	NA	NA	NA	NA	NA	NA	NA	NA	NA	NA	NA	NA	NA	NA	NA	NA	NA	NA	NA	NA	NA	NA	NA	NA	NA	NA	NA	NA	5.568	286.405	NA	NA	NA	NA	NA	NA	NA	NA	NA	NA	NA	NA	NA	NA
					89	NA	NA	NA	NA	NA	NA	NA	NA	NA	NA	NA	NA	NA	NA	NA	NA	NA	NA	NA	NA	NA	NA	NA	NA	NA	NA	NA	NA	5.632	279.821	NA	NA	NA	NA	NA	NA	NA	NA	NA	NA	NA	NA	NA	NA
					90	NA	NA	NA	NA	NA	NA	NA	NA	NA	NA	NA	NA	NA	NA	NA	NA	NA	NA	NA	NA	NA	NA	NA	NA	NA	NA	NA	NA	5.696	297.365	NA	NA	NA	NA	NA	NA	NA	NA	NA	NA	NA	NA	NA	NA
					91	NA	NA	NA	NA	NA	NA	NA	NA	NA	NA	NA	NA	NA	NA	NA	NA	NA	NA	NA	NA	NA	NA	NA	NA	NA	NA	NA	NA	5.76	310.14	NA	NA	NA	NA	NA	NA	NA	NA	NA	NA	NA	NA	NA	NA
					92	NA	NA	NA	NA	NA	NA	NA	NA	NA	NA	NA	NA	NA	NA	NA	NA	NA	NA	NA	NA	NA	NA	NA	NA	NA	NA	NA	NA	5.824	330.572	NA	NA	NA	NA	NA	NA	NA	NA	NA	NA	NA	NA	NA	NA
					93	NA	NA	NA	NA	NA	NA	NA	NA	NA	NA	NA	NA	NA	NA	NA	NA	NA	NA	NA	NA	NA	NA	NA	NA	NA	NA	NA	NA	5.888	322.602	NA	NA	NA	NA	NA	NA	NA	NA	NA	NA	NA	NA	NA	NA
					94	NA	NA	NA	NA	NA	NA	NA	NA	NA	NA	NA	NA	NA	NA	NA	NA	NA	NA	NA	NA	NA	NA	NA	NA	NA	NA	NA	NA	5.952	313.732	NA	NA	NA	NA	NA	NA	NA	NA	NA	NA	NA	NA	NA	NA
					95	NA	NA	NA	NA	NA	NA	NA	NA	NA	NA	NA	NA	NA	NA	NA	NA	NA	NA	NA	NA	NA	NA	NA	NA	NA	NA	NA	NA	NA	NA	NA	NA	NA	NA	NA	NA	NA	NA	NA	NA	NA	NA	NA	NA
					96	NA	NA	NA	NA	NA	NA	NA	NA	NA	NA	NA	NA	NA	NA	NA	NA	NA	NA	NA	NA	NA	NA	NA	NA	NA	NA	NA	NA	NA	NA	NA	NA	NA	NA	NA	NA	NA	NA	NA	NA	NA	NA	NA	NA
					97	NA	NA	NA	NA	NA	NA	NA	NA	NA	NA	NA	NA	NA	NA	NA	NA	NA	NA	NA	NA	NA	NA	NA	NA	NA	NA	NA	NA	NA	NA	NA	NA	NA	NA	NA	NA	NA	NA	NA	NA	NA	NA	NA	NA
					98	NA	NA	NA	NA	NA	NA	NA	NA	NA	NA	NA	NA	NA	NA	NA	NA	NA	NA	NA	NA	NA	NA	NA	NA	NA	NA	NA	NA	NA	NA	NA	NA	NA	NA	NA	NA	NA	NA	NA	NA	NA	NA	NA	NA
					99	NA	NA	NA	NA	NA	NA	NA	NA	NA	NA	NA	NA	NA	NA	NA	NA	NA	NA	NA	NA	NA	NA	NA	NA	NA	NA	NA	NA	NA	NA	NA	NA	NA	NA	NA	NA	NA	NA	NA	NA	NA	NA	NA	NA
					100	NA	NA	NA	NA	NA	NA	NA	NA	NA	NA	NA	NA	NA	NA	NA	NA	NA	NA	NA	NA	NA	NA	NA	NA	NA	NA	NA	NA	NA	NA	NA	NA	NA	NA	NA	NA	NA	NA	NA	NA	NA	NA	NA	NA
					101	NA	NA	NA	NA	NA	NA	NA	NA	NA	NA	NA	NA	NA	NA	NA	NA	NA	NA	NA	NA	NA	NA	NA	NA	NA	NA	NA	NA	NA	NA	NA	NA	NA	NA	NA	NA	NA	NA	NA	NA	NA	NA	NA	NA
					102	NA	NA	NA	NA	NA	NA	NA	NA	NA	NA	NA	NA	NA	NA	NA	NA	NA	NA	NA	NA	NA	NA	NA	NA	NA	NA	NA	NA	NA	NA	NA	NA	NA	NA	NA	NA	NA	NA	NA	NA	NA	NA	NA	NA
					103	NA	NA	NA	NA	NA	NA	NA	NA	NA	NA	NA	NA	NA	NA	NA	NA	NA	NA	NA	NA	NA	NA	NA	NA	NA	NA	NA	NA	NA	NA	NA	NA	NA	NA	NA	NA	NA	NA	NA	NA	NA	NA	NA	NA
					104	NA	NA	NA	NA	NA	NA	NA	NA	NA	NA	NA	NA	NA	NA	NA	NA	NA	NA	NA	NA	NA	NA	NA	NA	NA	NA	NA	NA	NA	NA	NA	NA	NA	NA	NA	NA	NA	NA	NA	NA	NA	NA	NA	NA
					105	NA	NA	NA	NA	NA	NA	NA	NA	NA	NA	NA	NA	NA	NA	NA	NA	NA	NA	NA	NA	NA	NA	NA	NA	NA	NA	NA	NA	NA	NA	NA	NA	NA	NA	NA	NA	NA	NA	NA	NA	NA	NA	NA	NA
					106	NA	NA	NA	NA	NA	NA	NA	NA	NA	NA	NA	NA	NA	NA	NA	NA	NA	NA	NA	NA	NA	NA	NA	NA	NA	NA	NA	NA	NA	NA	NA	NA	NA	NA	NA	NA	NA	NA	NA	NA	NA	NA	NA	NA
					107	NA	NA	NA	NA	NA	NA	NA	NA	NA	NA	NA	NA	NA	NA	NA	NA	NA	NA	NA	NA	NA	NA	NA	NA	NA	NA	NA	NA	NA	NA	NA	NA	NA	NA	NA	NA	NA	NA	NA	NA	NA	NA	NA	NA
					108	NA	NA	NA	NA	NA	NA	NA	NA	NA	NA	NA	NA	NA	NA	NA	NA	NA	NA	NA	NA	NA	NA	NA	NA	NA	NA	NA	NA	NA	NA	NA	NA	NA	NA	NA	NA	NA	NA	NA	NA	NA	NA	NA	NA
					109	NA	NA	NA	NA	NA	NA	NA	NA	NA	NA	NA	NA	NA	NA	NA	NA	NA	NA	NA	NA	NA	NA	NA	NA	NA	NA	NA	NA	NA	NA	NA	NA	NA	NA	NA	NA	NA	NA	NA	NA	NA	NA	NA	NA
					110	NA	NA	NA	NA	NA	NA	NA	NA	NA	NA	NA	NA	NA	NA	NA	NA	NA	NA	NA	NA	NA	NA	NA	NA	NA	NA	NA	NA	NA	NA	NA	NA	NA	NA	NA	NA	NA	NA	NA	NA	NA	NA	NA	NA
					111	NA	NA	NA	NA	NA	NA	NA	NA	NA	NA	NA	NA	NA	NA	NA	NA	NA	NA	NA	NA	NA	NA	NA	NA	NA	NA	NA	NA	NA	NA	NA	NA	NA	NA	NA	NA	NA	NA	NA	NA	NA	NA	NA	NA
					112	NA	NA	NA	NA	NA	NA	NA	NA	NA	NA	NA	NA	NA	NA	NA	NA	NA	NA	NA	NA	NA	NA	NA	NA	NA	NA	NA	NA	NA	NA	NA	NA	NA	NA	NA	NA	NA	NA	NA	NA	NA	NA	NA	NA
					113	NA	NA	NA	NA	NA	NA	NA	NA	NA	NA	NA	NA	NA	NA	NA	NA	NA	NA	NA	NA	NA	NA	NA	NA	NA	NA	NA	NA	NA	NA	NA	NA	NA	NA	NA	NA	NA	NA	NA	NA	NA	NA	NA	NA
					114	NA	NA	NA	NA	NA	NA	NA	NA	NA	NA	NA	NA	NA	NA	NA	NA	NA	NA	NA	NA	NA	NA	NA	NA	NA	NA	NA	NA	NA	NA	NA	NA	NA	NA	NA	NA	NA	NA	NA	NA	NA	NA	NA	NA
					115	NA	NA	NA	NA	NA	NA	NA	NA	NA	NA	NA	NA	NA	NA	NA	NA	NA	NA	NA	NA	NA	NA	NA	NA	NA	NA	NA	NA	NA	NA	NA	NA	NA	NA	NA	NA	NA	NA	NA	NA	NA	NA	NA	NA
[truncated: 148 more columns]

## Sheet: Nup60
Nup60-GFP						1								2								3								4								5								6
						Ic				Ir		Ibg		Ic				Ir		Ibg		Ic				Ir		Ibg		Ic				Ir		Ibg		Ic				Ir		Ibg		Ic
							209.808				224.441		138.045		232.353				316.676		142.958		189.022				384.248		135.297		238.183				260.862		132.85		273.28				303.92		141.49		290.833
							71.7629								89.3957								53.7249								105.333								131.791								151.843
	average	median	SEM	n		Relative accumulation (RA)					86.3957			Relative accumulation (RA)					173.718			Relative accumulation (RA)					248.95			Relative accumulation (RA)					128.013			Relative accumulation (RA)					162.43			Relative accumulation (RA)
RA:	0.817048	0.773031	0.055525	58		0.830631								0.514602								0.215806								0.822835								0.81137								1.60141
	p-value
	0.000430199
						140905_VizSt_Nup60GFP_01_10_R3D_D3D_Crop1_merge,tifGFP_x_lc	140905_VizSt_Nup60GFP_01_10_R3D_D3D_Crop1_merge,tifGFP_y_lc	140905_VizSt_Nup60GFP_01_10_R3D_D3D_Crop1_merge,tifmCh_x_cap	140905_VizSt_Nup60GFP_01_10_R3D_D3D_Crop1_merge,tifmCh_y_cap	140905_VizSt_Nup60GFP_01_10_R3D_D3D_Crop1_merge,tifGFP_x_lr	140905_VizSt_Nup60GFP_01_10_R3D_D3D_Crop1_merge,tifGFP_y_lr	140905_VizSt_Nup60GFP_01_10_R3D_D3D_Crop1_merge,tifGFP_x_bg	140905_VizSt_Nup60GFP_01_10_R3D_D3D_Crop1_merge,tifGFP_y_bg	140905_VizSt_Nup60GFP_01_09_R3D_D3D_Crop4_merge,tifGFP_x_lc	140905_VizSt_Nup60GFP_01_09_R3D_D3D_Crop4_merge,tifGFP_y_lc	140905_VizSt_Nup60GFP_01_09_R3D_D3D_Crop4_merge,tifmCh_x_cap	140905_VizSt_Nup60GFP_01_09_R3D_D3D_Crop4_merge,tifmCh_y_cap	140905_VizSt_Nup60GFP_01_09_R3D_D3D_Crop4_merge,tifGFP_x_lr	140905_VizSt_Nup60GFP_01_09_R3D_D3D_Crop4_merge,tifGFP_y_lr	140905_VizSt_Nup60GFP_01_09_R3D_D3D_Crop4_merge,tifGFP_x_bg	140905_VizSt_Nup60GFP_01_09_R3D_D3D_Crop4_merge,tifGFP_y_bg	140905_VizSt_Nup60GFP_01_09_R3D_D3D_Crop3_merge,tifGFP_x_lc	140905_VizSt_Nup60GFP_01_09_R3D_D3D_Crop3_merge,tifGFP_y_lc	140905_VizSt_Nup60GFP_01_09_R3D_D3D_Crop3_merge,tifmCh_x_cap	140905_VizSt_Nup60GFP_01_09_R3D_D3D_Crop3_merge,tifmCh_y_cap	140905_VizSt_Nup60GFP_01_09_R3D_D3D_Crop3_merge,tifGFP_x_lr	140905_VizSt_Nup60GFP_01_09_R3D_D3D_Crop3_merge,tifGFP_y_lr	140905_VizSt_Nup60GFP_01_09_R3D_D3D_Crop3_merge,tifGFP_x_bg	140905_VizSt_Nup60GFP_01_09_R3D_D3D_Crop3_merge,tifGFP_y_bg	140905_VizSt_Nup60GFP_01_09_R3D_D3D_Crop2_merge,tifGFP_x_lc	140905_VizSt_Nup60GFP_01_09_R3D_D3D_Crop2_merge,tifGFP_y_lc	140905_VizSt_Nup60GFP_01_09_R3D_D3D_Crop2_merge,tifmCh_x_cap	140905_VizSt_Nup60GFP_01_09_R3D_D3D_Crop2_merge,tifmCh_y_cap	140905_VizSt_Nup60GFP_01_09_R3D_D3D_Crop2_merge,tifGFP_x_lr	140905_VizSt_Nup60GFP_01_09_R3D_D3D_Crop2_merge,tifGFP_y_lr	140905_VizSt_Nup60GFP_01_09_R3D_D3D_Crop2_merge,tifGFP_x_bg	140905_VizSt_Nup60GFP_01_09_R3D_D3D_Crop2_merge,tifGFP_y_bg	140905_VizSt_Nup60GFP_01_09_R3D_D3D_Crop1_merge,tifGFP_x_lc	140905_VizSt_Nup60GFP_01_09_R3D_D3D_Crop1_merge,tifGFP_y_lc	140905_VizSt_Nup60GFP_01_09_R3D_D3D_Crop1_merge,tifmCh_x_cap	140905_VizSt_Nup60GFP_01_09_R3D_D3D_Crop1_merge,tifmCh_y_cap	140905_VizSt_Nup60GFP_01_09_R3D_D3D_Crop1_merge,tifGFP_x_lr	140905_VizSt_Nup60GFP_01_09_R3D_D3D_Crop1_merge,tifGFP_y_lr	140905_VizSt_Nup60GFP_01_09_R3D_D3D_Crop1_merge,tifGFP_x_bg	140905_VizSt_Nup60GFP_01_09_R3D_D3D_Crop1_merge,tifGFP_y_bg	140905_VizSt_Nup60GFP_01_08_R3D_D3D_Crop3_merge,tifGFP_x_lc	140905_VizSt_Nup60GFP_01_08_R3D_D3D_Crop3_merge,tifGFP_y_lc	140905_VizSt_Nup60GFP_01_08_R3D_D3D_Crop3_merge,tifmCh_x_cap	140905_VizSt_Nup60GFP_01_08_R3D_D3D_Crop3_merge,tifmCh_y_cap
					1	0	273	0	251	0	210	0	139	0	288	0	129	0	307	0	127	0	192	0	323	0	423	0	131	0	360	0	109	0	337	0	130	0	288	0	154	0	233	0	126	0	254	0	93
					2	0.064	290.075	0.064	399.696	0.064	198.349	0.064	141.33	0.064	272.08	0.064	192.841	0.064	274	0.064	133	0.064	175.248	0.064	287.018	0.064	457.172	0.064	130.479	0.064	371	0.064	159.2	0.064	371	0.064	128.793	0.064	318.919	0.064	197.352	0.064	239.264	0.064	135.08	0.064	239.531	0.064	113.527
					3	0.128	292.919	0.128	623.762	0.128	198.049	0.128	155.177	0.128	259.78	0.128	327.255	0.128	237	0.128	142	0.128	161.638	0.128	250.502	0.128	463.78	0.128	135.715	0.128	330	0.128	245.8	0.128	327	0.128	129.728	0.128	347.018	0.128	243.91	0.128	238.167	0.128	141.264	0.128	258.78	0.128	152.994
					4	0.192	258.857	0.192	874.141	0.192	206.346	0.192	137.603	0.192	266.528	0.192	561.471	0.192	227	0.192	130	0.192	154.174	0.192	232.041	0.192	444.472	0.192	139.812	0.192	298	0.192	374.4	0.192	303	0.192	132.871	0.192	299.182	0.192	307.627	0.192	242.502	0.192	143.177	0.192	314.212	0.192	246.014
					5	0.256	253.641	0.256	1232.16	0.256	206.01	0.256	118.966	0.256	278.717	0.256	925.961	0.256	238	0.256	137	0.256	156.242	0.256	241.24	0.256	425.778	0.256	147.068	0.256	276	0.256	567.96	0.256	280	0.256	136.161	0.256	261.876	0.256	409.547	0.256	254.601	0.256	145.346	0.256	339.939	0.256	414.023
					6	0.32	271.327	0.32	1671.2	0.32	253.596	0.32	128.079	0.32	279.448	0.32	1252.66	0.32	230	0.32	133	0.32	155.879	0.32	256.634	0.32	416.065	0.32	137.976	0.32	241	0.32	868	0.32	275	0.32	133.718	0.32	270.45	0.32	616.31	0.32	284.08	0.32	148.669	0.32	350.72	0.32	673.892
					7	0.384	278.659	0.384	1918.76	0.384	309.831	0.384	132.52	0.384	259.555	0.384	1633	0.384	222	0.384	128	0.384	170.212	0.384	250.412	0.384	423.892	0.384	121.158	0.384	202	0.384	1124.93	0.384	299	0.384	132.706	0.384	257.85	0.384	899.894	0.384	319.53	0.384	148.828	0.384	328.467	0.384	980.263
					8	0.448	281.618	0.448	1999.56	0.448	320.214	0.448	129.7	0.448	227.69	0.448	2065.32	0.448	257.911	0.448	143	0.448	176.653	0.448	239.012	0.448	426.061	0.448	125.205	0.448	178	0.448	1259.31	0.448	269	0.448	136.324	0.448	224.845	0.448	1293.07	0.448	344.11	0.448	140.928	0.448	335.364	0.448	1218.77
					9	0.512	263.961	0.512	1966.42	0.512	325.177	0.512	135.142	0.512	217	0.512	2347.82	0.512	300.575	0.512	144	0.512	176.083	0.512	264.728	0.512	439.288	0.512	142.065	0.512	178.464	0.512	1403.45	0.512	253	0.512	136.511	0.512	219.336	0.512	1683.7	0.512	403.82	0.512	144.75	0.512	368.694	0.512	1315.15
					10	0.576	233.442	0.576	1791.19	0.576	330.333	0.576	134.407	0.576	233.24	0.576	1997.25	0.576	319.495	0.576	142	0.576	191.013	0.576	341.8	0.576	432.605	0.576	147.071	0.576	192.296	0.576	1582.42	0.576	262	0.576	134.136	0.576	206.768	0.576	1828.05	0.576	481.82	0.576	142.108	0.576	357.452	0.576	1221.1
					11	0.64	203.112	0.64	1549.61	0.64	308.572	0.64	129.557	0.64	245.58	0.64	1402.32	0.64	323.404	0.64	138	0.64	200.188	0.64	402.563	0.64	399.078	0.64	138.997	0.64	201.338	0.64	1655.34	0.64	248	0.64	125.944	0.64	224.284	0.64	1736.86	0.64	516.35	0.64	144.047	0.64	325.579	0.64	973.227
					12	0.704	183.693	0.704	1282.64	0.704	280.796	0.704	130.085	0.704	239.04	0.704	844.298	0.704	309.457	0.704	131	0.704	190.073	0.704	423.576	0.704	388.95	0.704	139.605	0.704	183.451	0.704	1515.98	0.704	207	0.704	129.839	0.704	251.571	0.704	1408.88	0.704	524.45	0.704	147.208	0.704	384.1	0.704	664.203
					13	0.768	170.145	0.768	889.166	0.768	262.291	0.768	150.741	0.768	225.3	0.768	534.165	0.768	304.944	0.768	138	0.768	173.989	0.768	434.891	0.768	397.358	0.768	142.518	0.768	186.543	0.768	1244.13	0.768	171	0.768	127.63	0.768	281.033	0.768	1001.59	0.768	443.89	0.768	136.868	0.768	367.61	0.768	402.068
					14	0.832	158.375	0.832	532.796	0.832	233.987	0.832	154.475	0.832	207.98	0.832	375.907	0.832	325.707	0.832	150	0.832	172.241	0.832	416.964	0.832	381.069	0.832	139.645	0.832	209.92	0.832	926.87	0.832	157	0.832	120.782	0.832	301.964	0.832	694.313	0.832	424.868	0.832	124.772	0.832	286.95	0.832	215.008
					15	0.896	161.063	0.896	302.551	0.896	207.513	0.896	136.077	0.896	203.684	0.896	254.983	0.896	357.307	0.896	154	0.896	173.137	0.896	385.142	0.896	352.555	0.896	128.462	0.896	224.58	0.896	568.985	0.896	167	0.896	126.986	0.896	346.111	0.896	434.627	0.896	345.753	0.896	115.496	0.896	248.45	0.896	133.92
					16	0.96	164.93	0.96	175.38	0.96	208.159	0.96	127.435	0.96	205.982	0.96	181.997	0.96	384.619	0.96	148	0.96	171.063	0.96	353.882	0.96	344.103	0.96	119.834	0.96	224.84			0.96	187	0.96	142.811			0.96	276.173	0.96	257.462	0.96	110.139	0.96	211.59	0.96	95.811
					17	1.024	162.779	1.024	125.68	1.024	222.523	1.024	131.502	1.024	193.061	1.024	152.808	1.024	402.48	1.024	132	1.024	176.544	1.024	353.968	1.024	382.851	1.024	128.691	1.024	220.96			1.024	227	1.024	151.116					1.024	213.62	1.024	125.96	1.024	189.47	1.024	89.89
					18	1.088	180.339			1.088	219.431	1.088	134.652	1.088	177.278	1.088	146.027	1.088	392.438	1.088	127	1.088	191.849	1.088	379.737	1.088	475.542	1.088	141.734	1.088	204.76			1.088	243	1.088	143.543					1.088	198.173	1.088	156.277	1.088	188.93
					19	1.152	175.757			1.152	212.338	1.152	128.325	1.152	181.191			1.152	346.705	1.152	139	1.152	186.803	1.152	428.222	1.152	520.537	1.152	137.343	1.152	183.18			1.152	323	1.152	150.786					1.152	201.224	1.152	164.812	1.152	175.98
					20	1.216	164.731			1.216	227.398	1.216	130.805	1.216	185.934			1.216	308.966	1.216	149.481	1.216	186.731	1.216	514.253	1.216	516.692	1.216	134.416	1.216	165.96			1.216	421	1.216	162.31					1.216	213.45	1.216	156.739
					21	1.28	156.178			1.28	244.414	1.28	140.74					1.28	341.996	1.28	141.178	1.28	175.867	1.28	620.824	1.28	470.094	1.28	130.859	1.28	195.436			1.28	416	1.28	153.975					1.28	237.117	1.28	154.969
					22	1.344	158.107			1.344	245.511	1.344	151.512					1.344	366.838	1.344	143.604	1.344	178.675	1.344	727.703	1.344	423.262	1.344	127.346	1.344	247.191			1.344	352.728	1.344	131.077					1.344	274.774	1.344	145.284
					23	1.408	172.195			1.408	260.139	1.408	151.726					1.408	368.74	1.408	152.492	1.408	192.365	1.408	818.099	1.408	369.981	1.408	125.496	1.408	280.261			1.408	272.266	1.408	119.711					1.408	311.068	1.408	133.409
					24	1.472	169.017			1.472	265.71	1.472	152.689					1.472	382.769	1.472	149.015	1.472	195.241	1.472	905.303	1.472	330.471	1.472	133.255	1.472	292.103			1.472	246.954	1.472	122.948					1.472	317.318	1.472	137.832
					25	1.536	167.274			1.536	276.899	1.536	162.034					1.536	370.071	1.536	142.23	1.536	194.971	1.536	964.834	1.536	305.54	1.536	140.638	1.536	307.293			1.536	236.339	1.536	122.811					1.536	313.206	1.536	145.939
					26					1.6	288.322	1.6	154.274					1.6	363.881	1.6	136.747	1.6	204.448	1.6	920.789	1.6	305.662	1.6	134.342					1.6	247.846	1.6	126.956					1.6	321.265	1.6	139.899
					27					1.664	293.981	1.664	145.507					1.664	377.657	1.664	135.906	1.664	213.402	1.664	725.72	1.664	319.87	1.664	135.546					1.664	306.385	1.664	129.188					1.664	337.243	1.664	133.413
					28					1.728	283.144	1.728	152.647					1.728	441.095	1.728	133.565	1.728	228.737	1.728	559.416	1.728	331.618	1.728	134.15					1.728	352.946	1.728	125.662					1.728	348.864	1.728	138.137
					29					1.792	253.415	1.792	150.248					1.792	482.48	1.792	138.076	1.792	254.459	1.792	490.511	1.792	331.505	1.792	126.631					1.792	351.35	1.792	128.181					1.792	327.968	1.792	140.011
					30					1.856	249.347	1.856	135.837					1.856	444.153	1.856	155.512	1.856	253.404	1.856	382.551	1.856	313.529	1.856	123.935					1.856	349.12	1.856	140.065					1.856	304.548	1.856	133.207
					31					1.92	222.568	1.92	129.75					1.92	409.876	1.92	165.933	1.92	236.365	1.92	335.215	1.92	340.691	1.92	125.956					1.92	300.12	1.92	150.349					1.92	323.803	1.92	132.482
					32					1.984	190.965	1.984	142.51					1.984	409.722	1.984	147.329					1.984	358.105	1.984	125.606					1.984	271.62	1.984	139.359					1.984	311.901	1.984	137.113
					33					2.048	184.579	2.048	152.48					2.048	424.075	2.048	132.329					2.048	328.959	2.048	131.335					2.048	320.76	2.048	134.344					2.048	274.39	2.048	133.417
					34					2.112	206.163	2.112	143.346					2.112	397.545	2.112	138.104					2.112	293.806	2.112	149.423					2.112	356.9	2.112	132.843					2.112	259.326	2.112	135.611
					35					2.176	226.426	2.176	138.354					2.176	368.428	2.176	143.049					2.176	264.335	2.176	158.094					2.176	318.292	2.176	131.311					2.176	252.073	2.176	149.342
					36					2.24	223.442	2.24	143.145					2.24	374	2.24	146.017					2.24	234.649	2.24	152.955					2.24	279.714	2.24	130.075					2.24	232.946	2.24	143.667
					37					2.304	231.589	2.304	147.974					2.304	351.407	2.304	144.791							2.304	149.659					2.304	245.547	2.304	119.458					2.304	210.569	2.304	140.37
					38					2.368	235.92	2.368	148.16					2.368	316.822	2.368	138.03							2.368	145.425					2.368	215.996	2.368	113.497					2.368	194.737	2.368	135.377
					39					2.432	241.88	2.432	148.203					2.432	290.569	2.432	133.692							2.432	133.77					2.432	200.734	2.432	122.569					2.432	175.005	2.432	139.335
					40					2.496	253.76	2.496	153.031					2.496	286.963	2.496	135.045							2.496	125.127					2.496	203.096	2.496	134.746					2.496	166.042	2.496	138.997
					41					2.56	256.94	2.56	146.105					2.56	299.21	2.56	136.74							2.56	134.946					2.56	198.857	2.56	133.826					2.56	160.893	2.56	149.915
					42					2.624	227.6	2.624	131.468					2.624	276.141	2.624	139.736							2.624	150.873					2.624	175.601	2.624	129.949					2.624	153.008	2.624	155.451
					43					2.688	187.8	2.688	130.747					2.688	258.019	2.688	146.431							2.688	153.198					2.688	164.662	2.688	129.93					2.688	145.751	2.688	149.754
					44					2.752	192.88	2.752	144.757					2.752	253.079	2.752	158.525							2.752	151.03					2.752	166.741	2.752	134.511					2.752	163.892	2.752	143.836
					45					2.816	195.94	2.816	138.611					2.816	270.533	2.816	159.83							2.816	147.931					2.816	169.128	2.816	133.345					2.816	175.43	2.816	134.467
					46					2.88	206.78	2.88	132.08					2.88	287.039	2.88	159.19							2.88	131.398					2.88	175.31	2.88	131.777					2.88	197.928	2.88	136.003
					47					2.944	210.92	2.944	123.843					2.944	281.066	2.944	147.599							2.944	125.288					2.944	176.776	2.944	135.558					2.944	220.349	2.944	151.598
					48					3.008	205.12	3.008	119.07					3.008	275.835	3.008	145.674							3.008	135.871					3.008	169.052	3.008	131.034					3.008	290.241	3.008	157.771
					49					3.072	259.88	3.072	122.054					3.072	300.977	3.072	161.873							3.072	137.803					3.072	197.43	3.072	126.501					3.072	391.379	3.072	156.27
					50					3.136	295.3	3.136	122.587					3.136	317.586	3.136	160.617							3.136	128.018					3.136	254.083	3.136	125.747					3.136	456.152	3.136	155.355
					51					3.2	286.2	3.2	131.925					3.2	320.743	3.2	152.847							3.2	132.127					3.2	265.06	3.2	129.013					3.2	449.684	3.2	155.68
					52					3.264	279.14	3.264	134.079					3.264	293.105	3.264	150.323							3.264	137.208					3.264	278.919	3.264	130.939					3.264	428.328	3.264	161.533
					53					3.328	251.56	3.328	142.14					3.328	273.218	3.328	139.248							3.328	126.519					3.328	259.689	3.328	136.96					3.328	445.542	3.328	158.964
					54					3.392	268.195	3.392	138.843					3.392	278.924									3.392	118.179					3.392	214.645	3.392	134.763					3.392	416.132	3.392	156.782
					55					3.456	247.169	3.456	136.183					3.456	272.887									3.456	118.375					3.456	196.449	3.456	134.106					3.456	395.716	3.456	153.453
					56					3.52	228.063	3.52	142.785					3.52	265.31									3.52	126.612					3.52	215.384	3.52	140.064					3.52	378.226	3.52	149.237
					57					3.584	212.163	3.584	139.443					3.584	267.702									3.584	133.501					3.584	243.495	3.584	139.955					3.584	349.08	3.584	142.765
					58					3.648	199.28	3.648	141.381					3.648	284.018									3.648	140.034					3.648	246.375	3.648	125.479					3.648	339.767	3.648	134.423
					59					3.712	168.872	3.712	137.921					3.712	284.087															3.712	249.908							3.712	356.342	3.712	136.48
					60					3.776	148.159	3.776	126.394					3.776	243.922															3.776	229.84							3.776	382.215	3.776	142.455
					61					3.84	143.193	3.84	120.646					3.84	206.439															3.84	178.12							3.84	374.542	3.84	144.089
					62					3.904	161.012	3.904	123.467					3.904	185.958															3.904	159.68							3.904	329.897	3.904	135.05
					63					3.968	161.793	3.968	120.55																					3.968	165.72							3.968	292.164	3.968	131.974
					64					4.032	145.803																							4.032	184.24							4.032	256.746	4.032	144.305
					65					4.096	150.646																							4.096	235.88							4.096	239.061	4.096	152.681
					66					4.16	158.773																							4.16	303.28							4.16	254.092	4.16	149.852
					67					4.224	183.141																							4.224	359.76							4.224	311.347	4.224	140.579
					68					4.288	207.534																							4.288	365.31							4.288	357.835	4.288	138.735
					69					4.352	217.583																							4.352	335.506							4.352	384.421	4.352	140.237
					70					4.416	222.159																							4.416	317.049									4.416	139.022
					71					4.48	245.37																							4.48	338.208									4.48	129.77
					72					4.544	254.421																							4.544	359.53									4.544	135.138
					73					4.608	251.032																							4.608	353.949									4.608	141.721
					74					4.672	249.278																							4.672	321.804									4.672	134.454
					75					4.736	229.192																							4.736	243.912									4.736	127.049
					76					4.8	192.979																							4.8	267.5									4.8	122.176
					77					4.864	167.428																							4.864	272.215									4.864	123.474
					78					4.928	171.73																							4.928	249.827									4.928	139.741
					79					4.992	158.173																							4.992	230.334									4.992	144.813
					80					5.056	168.023																							5.056	236.997									5.056	136.31
					81					5.12	176.611																							5.12	231.914									5.12	137.685
					82					5.184	178.168																																	5.184	144.813
					83					5.248	184.692
					84					5.312	177.354
					85					5.376	174.311
					86
					87
					88
					89
					90
					91
					92
					93
					94
					95
					96
					97
					98
					99
					100
					101
					102
					103
					104
					105
					106
					107
					108
					109
					110
					111
					112
					113
					114
					115
					116
					117
					118
					119
					120
					121
					122
					123
					124
					125
					126
					127
[truncated: 422 more columns]

## Sheet: Nup2
Nup2-GFP						1								2								3								4								5								6
						Ic				Ir		Ibg		Ic				Ir		Ibg		Ic				Ir		Ibg		Ic				Ir		Ibg		Ic				Ir		Ibg		Ic
							2366.55				2793.89		220.152		3662.82				2562.31		252.727		3191.54				2798.75		242.496		2121.19				1550.69		238.572		1487.03				1742.4		269.865		3096.88
							2146.39								3410.09								2949.05								1882.62								1217.17								2761.11
	average	median	SEM	n		Relative accumulation (RA)					2573.74			Relative accumulation (RA)					2309.59			Relative accumulation (RA)					2556.26			Relative accumulation (RA)					1312.11			Relative accumulation (RA)					1472.53			Relative accumulation (RA)
RA:	1.34283	1.30546	0.0873595	34		0.833959								1.47649								1.15366								1.4348								0.82658								1.08971
	p-value
	0.00463154
						Nup2-GFP_03_10Crop1_merge.tifGFP_x_lc	Nup2-GFP_03_10Crop1_merge.tifGFP_y_lc	Nup2-GFP_03_10Crop1_merge.tifmCh_x_cap	Nup2-GFP_03_10Crop1_merge.tifmCh_y_cap	Nup2-GFP_03_10Crop1_merge.tifGFP_x_lr	Nup2-GFP_03_10Crop1_merge.tifGFP_y_lr	Nup2-GFP_03_10Crop1_merge.tifGFP_x_bg	Nup2-GFP_03_10Crop1_merge.tifGFP_y_bg	Nup2-GFP_03_09Crop2_merge.tifGFP_x_lc	Nup2-GFP_03_09Crop2_merge.tifGFP_y_lc	Nup2-GFP_03_09Crop2_merge.tifmCh_x_cap	Nup2-GFP_03_09Crop2_merge.tifmCh_y_cap	Nup2-GFP_03_09Crop2_merge.tifGFP_x_lr	Nup2-GFP_03_09Crop2_merge.tifGFP_y_lr	Nup2-GFP_03_09Crop2_merge.tifGFP_x_bg	Nup2-GFP_03_09Crop2_merge.tifGFP_y_bg	Nup2-GFP_03_09Crop1_merge.tifGFP_x_lc	Nup2-GFP_03_09Crop1_merge.tifGFP_y_lc	Nup2-GFP_03_09Crop1_merge.tifmCh_x_cap	Nup2-GFP_03_09Crop1_merge.tifmCh_y_cap	Nup2-GFP_03_09Crop1_merge.tifGFP_x_lr	Nup2-GFP_03_09Crop1_merge.tifGFP_y_lr	Nup2-GFP_03_09Crop1_merge.tifGFP_x_bg	Nup2-GFP_03_09Crop1_merge.tifGFP_y_bg	Nup2-GFP_03_08Crop2_merge.tifGFP_x_lc	Nup2-GFP_03_08Crop2_merge.tifGFP_y_lc	Nup2-GFP_03_08Crop2_merge.tifmCh_x_cap	Nup2-GFP_03_08Crop2_merge.tifmCh_y_cap	Nup2-GFP_03_08Crop2_merge.tifGFP_x_lr	Nup2-GFP_03_08Crop2_merge.tifGFP_y_lr	Nup2-GFP_03_08Crop2_merge.tifGFP_x_bg	Nup2-GFP_03_08Crop2_merge.tifGFP_y_bg	Nup2-GFP_03_08Crop2_merge.tifGFP_x_lc	Nup2-GFP_03_08Crop2_merge.tifGFP_y_lc	Nup2-GFP_03_08Crop2_merge.tifmCh_x_cap	Nup2-GFP_03_08Crop2_merge.tifmCh_y_cap	Nup2-GFP_03_08Crop2_merge.tifGFP_x_lr	Nup2-GFP_03_08Crop2_merge.tifGFP_y_lr	Nup2-GFP_03_08Crop2_merge.tifGFP_x_bg	Nup2-GFP_03_08Crop2_merge.tifGFP_y_bg	Nup2-GFP_03_08Crop1_merge.tifGFP_x_lc	Nup2-GFP_03_08Crop1_merge.tifGFP_y_lc	Nup2-GFP_03_08Crop1_merge.tifmCh_x_cap	Nup2-GFP_03_08Crop1_merge.tifmCh_y_cap
					1	0	3071	0	344	0	3357	0	201	0	806	0	1576	0	4786	0	185	0	3542	0	111	0	3542	0	199	0	1794	0	2683	0	1884	0	291	0	1367	0	532	0	1535	0	278	0	1980	0	1832
					2	0.128	2942.13	0.128	354.194	0.128	3596.17	0.128	213	0.128	943	0.128	3416.39	0.128	4667.47	0.128	163.334	0.128	2536	0.128	870.39	0.128	2414.32	0.128	190.651	0.128	1973.01	0.128	3623.79	0.128	2162	0.128	250.373	0.128	1202.76	0.128	2013.68	0.128	2463	0.128	288.882	0.128	964.184	0.128	3655.19
					3	0.256	2306.18	0.256	322.592	0.256	4154.82	0.256	214	0.256	1158	0.256	4872.18	0.256	4123.53	0.256	140.976	0.256	2204	0.256	2807.66	0.256	1798.52	0.256	189.388	0.256	1937.61	0.256	3398.13	0.256	2082	0.256	246.333	0.256	1103.24	0.256	3273.18	0.256	3382	0.256	255.348	0.256	879.857	0.256	6489.61
					4	0.384	1359.52	0.384	303.03	0.384	3970.45	0.384	232	0.384	1556	0.384	5563.56	0.384	2536.64	0.384	144.531	0.384	2471	0.384	6916.94	0.384	1641.16	0.384	191.318	0.384	1785.9	0.384	2264.42	0.384	2385	0.384	243.973	0.384	1014.08	0.384	3843.14	0.384	3637	0.384	250.604	0.384	1438.54	0.384	9302.62
					5	0.512	802.027	0.512	407.8	0.512	3506.7	0.512	223	0.512	2076.53	0.512	6073.4	0.512	1631.55	0.512	172.854	0.512	2997	0.512	11164.8	0.512	2309.6	0.512	205.985	0.512	1806.52	0.512	1111.62	0.512	2574	0.512	216.281	0.512	895.8	0.512	3769.58	0.512	2528	0.512	281.932	0.512	2218.86	0.512	9938.83
					6	0.64	566.339	0.64	813.84	0.64	2940.04	0.64	210	0.64	2257.53	0.64	6692.53	0.64	1408.18	0.64	201.938	0.64	3269	0.64	13954.3	0.64	3592	0.64	218.901	0.64	1707.59	0.64	302.811	0.64	2733	0.64	224.489	0.64	752	0.64	2655.86	0.64	1488.36	0.64	309.623	0.64	3687.96	0.64	9083.52
					7	0.768	471.861	0.768	1566.09	0.768	2894.04	0.768	198	0.768	2519.89	0.768	6638.36	0.768	1646.95	0.768	251.239	0.768	2593	0.768	15135.1	0.768	3770.29	0.768	211.618	0.768	1920.45	NA	NA	0.768	2438	0.768	229.033	0.768	1091	0.768	1355.86	0.768	1070.37	0.768	334.034	0.768	5009.83	0.768	7902.77
					8	0.896	481.369	0.896	2703.27	0.896	3057.64	0.896	195	0.896	4297.06	0.896	6141.89	0.896	2000.07	0.896	291.962	0.896	1855.65	0.896	15293.5	0.896	3544.71	0.896	205.358	0.896	2099.58	NA	NA	0.896	1631	0.896	219.657	0.896	1355	0.896	454.064	0.896	1178.38	0.896	323.345	0.896	5211.99	0.896	6401.9
					9	1.024	733.532	1.024	4078.26	1.024	3185.44	1.024	196	1.024	6336.55	1.024	5178.47	1.024	1993.38	1.024	319.031	1.024	1974.51	1.024	15599.9	1.024	2633.41	1.024	209.033	1.024	2351.92	NA	NA	1.024	1264	1.024	214.778	1.024	1112.74	1.024	183.203	1.024	1461.59	1.024	309.412	1.024	4828.84	1.024	4768.52
					10	1.152	1396.46	1.152	5105.44	1.152	3171.84	1.152	210.579	1.152	6940.93	1.152	3670.89	1.152	1820.24	1.152	328.271	1.152	2640.55	1.152	16055	1.152	2132.83	1.152	219.961	1.152	2535.84	NA	NA	1.152	1558	1.152	214.231	1.152	977.057	1.152	98.81	1.152	1250.35	1.152	296.695	1.152	4252.89	1.152	3464.56
					11	1.28	2690.36	1.28	4696.59	1.28	2532.77	1.28	217.538	1.28	7121.2	1.28	1870.96	1.28	1988.48	1.28	321.755	1.28	3437.49	1.28	16204.9	1.28	2658.81	1.28	243.396	1.28	2659.62	NA	NA	1.28	1778	1.28	229.28	1.28	978.324	NA	NA	1.28	919.917	1.28	268.051	1.28	3467.07	1.28	2272.92
					12	1.408	4502.47	1.408	3284.42	1.408	2308.52	1.408	222.812	1.408	6716.3	1.408	844.813	1.408	2582.69	1.408	279.861	1.408	3726.93	1.408	15934.8	1.408	3447.82	1.408	247.749	1.408	2684.26	NA	NA	1.408	1697.78	1.408	252.335	1.408	1273	NA	NA	1.408	845.055	1.408	254.537	1.408	2842.55	1.408	1157.21
					13	1.536	5441.07	1.536	2041.39	1.536	2466.92	1.536	241.881	1.536	6210	1.536	354.986	1.536	2663.47	1.536	241.367	1.536	3986.76	1.536	14953.3	1.536	4031.75	1.536	260.859	1.536	2319.16	NA	NA	1.536	1195.32	1.536	252.433	1.536	2067.84	NA	NA	1.536	1219.88	1.536	247.299	1.536	2200.38	1.536	393.117
					14	1.664	4867.93	NA	NA	1.664	2522.53	1.664	256.639	1.664	5197	1.664	146.651	1.664	2629.45	1.664	236.803	1.664	4079.49	1.664	13311.9	1.664	3597.78	1.664	261.381	NA	NA	NA	NA	1.664	1164.58	1.664	255.815	1.664	2875.24	NA	NA	1.664	1983.72	1.664	241.801	1.664	2288.02	NA	NA
					15	1.792	3865.93	NA	NA	1.792	2007.74	1.792	254.28	1.792	3979.67	NA	NA	1.792	2316.63	1.792	252.06	1.792	4100.07	1.792	8661.69	1.792	3145.69	1.792	275.595	NA	NA	NA	NA	1.792	1403.66	NA	NA	1.792	3139.08	NA	NA	1.792	2466.48	1.792	250.153	1.792	2885.66	NA	NA
					16	NA	NA	NA	NA	1.92	1795.74	1.92	244.572	1.92	3234.84	NA	NA	1.92	1848.02	1.92	263.094	1.92	4094.28	NA	NA	1.92	2758.99	1.92	299.349	NA	NA	NA	NA	1.92	1673.29	NA	NA	1.92	2588.36	NA	NA	1.92	2284.38	1.92	254.11	1.92	3383.42	NA	NA
					17	NA	NA	NA	NA	2.048	1353.39	2.048	258.204	2.048	2434.41	NA	NA	2.048	1655.57	2.048	265.327	2.048	4375.15	NA	NA	2.048	2477.61	2.048	292.173	NA	NA	NA	NA	2.048	2258.67	NA	NA	NA	NA	NA	NA	2.048	2394.58	2.048	225.641	2.048	3629.55	NA	NA
					18	NA	NA	NA	NA	2.176	1032.23	2.176	239.792	2.176	2145.87	NA	NA	2.176	1691.41	2.176	273.385	2.176	3762.68	NA	NA	2.176	2355.04	2.176	273.747	NA	NA	NA	NA	2.176	2664.91	NA	NA	NA	NA	NA	NA	2.176	2459.32	2.176	233.085	2.176	3616.54	NA	NA
					19	NA	NA	NA	NA	2.304	987.263	2.304	222.7	NA	NA	NA	NA	2.304	1745.16	2.304	267.989	2.304	2993.74	NA	NA	2.304	2188.57	2.304	289.971	NA	NA	NA	NA	2.304	2229.83	NA	NA	NA	NA	NA	NA	2.304	2736.02	2.304	224.883	2.304	3527.51	NA	NA
					20	NA	NA	NA	NA	2.432	1099.35	2.432	227.4	NA	NA	NA	NA	2.432	1908.92	2.432	263.93	NA	NA	NA	NA	2.432	2178.67	2.432	286.166	NA	NA	NA	NA	2.432	1590.31	NA	NA	NA	NA	NA	NA	2.432	2515.11	NA	NA	2.432	3623.88	NA	NA
					21	NA	NA	NA	NA	2.56	1343.12	2.56	211.6	NA	NA	NA	NA	2.56	2118.74	2.56	277.333	NA	NA	NA	NA	2.56	2306.89	2.56	274.871	NA	NA	NA	NA	2.56	1281.43	NA	NA	NA	NA	NA	NA	2.56	1979.76	NA	NA	NA	NA	NA	NA
					22	NA	NA	NA	NA	2.688	1758.15	2.688	196.8	NA	NA	NA	NA	2.688	2186.03	2.688	274.49	NA	NA	NA	NA	2.688	2529.31	2.688	258.259	NA	NA	NA	NA	2.688	1174.16	NA	NA	NA	NA	NA	NA	2.688	2097.13	NA	NA	NA	NA	NA	NA
					23	NA	NA	NA	NA	2.816	2715.07	2.816	176.7	NA	NA	NA	NA	2.816	2305.76	2.816	254.517	NA	NA	NA	NA	2.816	2842.82	2.816	266.319	NA	NA	NA	NA	2.816	983.357	NA	NA	NA	NA	NA	NA	2.816	2592.97	NA	NA	NA	NA	NA	NA
					24	NA	NA	NA	NA	2.944	3736.13	NA	NA	NA	NA	NA	NA	2.944	2366.59	2.944	245.806	NA	NA	NA	NA	2.944	3371	2.944	261.128	NA	NA	NA	NA	2.944	983.99	NA	NA	NA	NA	NA	NA	2.944	2753.2	NA	NA	NA	NA	NA	NA
					25	NA	NA	NA	NA	3.072	4626.85	NA	NA	NA	NA	NA	NA	3.072	2535.59	3.072	260.215	NA	NA	NA	NA	3.072	3247.1	3.072	269.162	NA	NA	NA	NA	3.072	1178.87	NA	NA	NA	NA	NA	NA	3.072	2279.24	NA	NA	NA	NA	NA	NA
					26	NA	NA	NA	NA	3.2	4736.89	NA	NA	NA	NA	NA	NA	3.2	3400.42	3.2	290.2	NA	NA	NA	NA	3.2	2773.63	3.2	268.436	NA	NA	NA	NA	3.2	1360	NA	NA	NA	NA	NA	NA	3.2	1429.79	NA	NA	NA	NA	NA	NA
					27	NA	NA	NA	NA	3.328	4249.91	NA	NA	NA	NA	NA	NA	3.328	4663.95	3.328	316.11	NA	NA	NA	NA	3.328	2409.31	3.328	256.733	NA	NA	NA	NA	3.328	1494.2	NA	NA	NA	NA	NA	NA	3.328	1054.94	NA	NA	NA	NA	NA	NA
					28	NA	NA	NA	NA	3.456	4071.75	NA	NA	NA	NA	NA	NA	3.456	4777.16	3.456	317.607	NA	NA	NA	NA	3.456	2665.49	3.456	236.196	NA	NA	NA	NA	3.456	1405.33	NA	NA	NA	NA	NA	NA	3.456	1277.2	NA	NA	NA	NA	NA	NA
					29	NA	NA	NA	NA	3.584	3608.74	NA	NA	NA	NA	NA	NA	3.584	3294.03	3.584	292.759	NA	NA	NA	NA	NA	NA	3.584	214.039	NA	NA	NA	NA	3.584	1322.25	NA	NA	NA	NA	NA	NA	3.584	1269.59	NA	NA	NA	NA	NA	NA
					30	NA	NA	NA	NA	3.712	3136.27	NA	NA	NA	NA	NA	NA	3.712	2347.24	3.712	256.181	NA	NA	NA	NA	NA	NA	3.712	198.126	NA	NA	NA	NA	3.712	1402.36	NA	NA	NA	NA	NA	NA	3.712	1199.45	NA	NA	NA	NA	NA	NA
					31	NA	NA	NA	NA	3.84	2603.45	NA	NA	NA	NA	NA	NA	3.84	2200.93	3.84	236.795	NA	NA	NA	NA	NA	NA	NA	NA	NA	NA	NA	NA	3.84	1455.07	NA	NA	NA	NA	NA	NA	3.84	1275.74	NA	NA	NA	NA	NA	NA
					32	NA	NA	NA	NA	3.968	2380.76	NA	NA	NA	NA	NA	NA	3.968	2153.8	3.968	228.24	NA	NA	NA	NA	NA	NA	NA	NA	NA	NA	NA	NA	3.968	1297.06	NA	NA	NA	NA	NA	NA	3.968	1385.92	NA	NA	NA	NA	NA	NA
					33	NA	NA	NA	NA	4.096	2402.33	NA	NA	NA	NA	NA	NA	NA	NA	4.096	225.022	NA	NA	NA	NA	NA	NA	NA	NA	NA	NA	NA	NA	4.096	1073.22	NA	NA	NA	NA	NA	NA	4.096	1544.86	NA	NA	NA	NA	NA	NA
					34	NA	NA	NA	NA	4.224	2396.97	NA	NA	NA	NA	NA	NA	NA	NA	NA	NA	NA	NA	NA	NA	NA	NA	NA	NA	NA	NA	NA	NA	4.224	1083.87	NA	NA	NA	NA	NA	NA	4.224	1338.42	NA	NA	NA	NA	NA	NA
					35	NA	NA	NA	NA	4.352	2382.86	NA	NA	NA	NA	NA	NA	NA	NA	NA	NA	NA	NA	NA	NA	NA	NA	NA	NA	NA	NA	NA	NA	4.352	994.966	NA	NA	NA	NA	NA	NA	4.352	1005.83	NA	NA	NA	NA	NA	NA
					36	NA	NA	NA	NA	4.48	2490.28	NA	NA	NA	NA	NA	NA	NA	NA	NA	NA	NA	NA	NA	NA	NA	NA	NA	NA	NA	NA	NA	NA	4.48	835.99	NA	NA	NA	NA	NA	NA	4.48	972.25	NA	NA	NA	NA	NA	NA
					37	NA	NA	NA	NA	NA	NA	NA	NA	NA	NA	NA	NA	NA	NA	NA	NA	NA	NA	NA	NA	NA	NA	NA	NA	NA	NA	NA	NA	4.608	621.807	NA	NA	NA	NA	NA	NA	4.608	1017.97	NA	NA	NA	NA	NA	NA
					38	NA	NA	NA	NA	NA	NA	NA	NA	NA	NA	NA	NA	NA	NA	NA	NA	NA	NA	NA	NA	NA	NA	NA	NA	NA	NA	NA	NA	4.736	610.782	NA	NA	NA	NA	NA	NA	4.736	1137.78	NA	NA	NA	NA	NA	NA
					39																																	NA	NA	NA	NA	4.864	1137.62	NA	NA	NA	NA	NA	NA
					40																																	NA	NA	NA	NA	4.992	1185.82	NA	NA	NA	NA	NA	NA
					41																																	NA	NA	NA	NA	5.12	1460.65	NA	NA	NA	NA	NA	NA
					42																																	NA	NA	NA	NA	5.248	1966.15	NA	NA	NA	NA	NA	NA
					43																																	NA	NA	NA	NA	NA	NA	NA	NA	NA	NA	NA	NA
					44																																	NA	NA	NA	NA	NA	NA	NA	NA	NA	NA	NA	NA
					45																																	NA	NA	NA	NA	NA	NA	NA	NA	NA	NA	NA	NA
					46																																	NA	NA	NA	NA	NA	NA	NA	NA	NA	NA	NA	NA
					47																																	NA	NA	NA	NA	NA	NA	NA	NA	NA	NA	NA	NA
					48																																	NA	NA	NA	NA	NA	NA	NA	NA	NA	NA	NA	NA
					49																																	NA	NA	NA	NA	NA	NA	NA	NA	NA	NA	NA	NA
					50																																	NA	NA	NA	NA	NA	NA	NA	NA	NA	NA	NA	NA
					51																																	NA	NA	NA	NA	NA	NA	NA	NA	NA	NA	NA	NA
					52																																	NA	NA	NA	NA	NA	NA	NA	NA	NA	NA	NA	NA
[truncated: 228 more columns]

## Sheet: Nup170
Nup170-GFP						1								2								3								4								5								6
						Ic				Ir		Ibg		Ic				Ir		Ibg		Ic				Ir		Ibg		Ic				Ir		Ibg		Ic				Ir		Ibg		Ic
							753.776				714.719		139.07		786.871				418.644		164.484		989.79				393.467		116.243		481.154				338.34		123.565		747.054				664.423		133.02		1041.42
							614.706								622.387								873.547								357.588								614.034								891.604
	average	median	SEM	n		Relative accumulation (RA)					575.649			Relative accumulation (RA)					254.16			Relative accumulation (RA)					277.224			Relative accumulation (RA)					214.775			Relative accumulation (RA)					531.403			Relative accumulation (RA)
RA:	2.32004	2.22507	0.149777	41		1.06785								2.4488								3.15106								1.66494								1.15549								2.46787
	p-value
	7.58446e-16
						140905_VizSt_Nup170GFP03_10Crop2_merge.tifGFP_x_lc	140905_VizSt_Nup170GFP03_10Crop2_merge.tifGFP_y_lc	140905_VizSt_Nup170GFP03_10Crop2_merge.tifmCh_x_cap	140905_VizSt_Nup170GFP03_10Crop2_merge.tifmCh_y_cap	140905_VizSt_Nup170GFP03_10Crop2_merge.tifGFP_x_lr	140905_VizSt_Nup170GFP03_10Crop2_merge.tifGFP_y_lr	140905_VizSt_Nup170GFP03_10Crop2_merge.tifGFP_x_bg	140905_VizSt_Nup170GFP03_10Crop2_merge.tifGFP_y_bg	140905_VizSt_Nup170GFP03_10Crop1_merge.tifGFP_x_lc	140905_VizSt_Nup170GFP03_10Crop1_merge.tifGFP_y_lc	140905_VizSt_Nup170GFP03_10Crop1_merge.tifmCh_x_cap	140905_VizSt_Nup170GFP03_10Crop1_merge.tifmCh_y_cap	140905_VizSt_Nup170GFP03_10Crop1_merge.tifGFP_x_lr	140905_VizSt_Nup170GFP03_10Crop1_merge.tifGFP_y_lr	140905_VizSt_Nup170GFP03_10Crop1_merge.tifGFP_x_bg	140905_VizSt_Nup170GFP03_10Crop1_merge.tifGFP_y_bg	140905_VizSt_Nup170GFP03_06Crop1_merge.tifGFP_x_lc	140905_VizSt_Nup170GFP03_06Crop1_merge.tifGFP_y_lc	140905_VizSt_Nup170GFP03_06Crop1_merge.tifmCh_x_cap	140905_VizSt_Nup170GFP03_06Crop1_merge.tifmCh_y_cap	140905_VizSt_Nup170GFP03_06Crop1_merge.tifGFP_x_lr	140905_VizSt_Nup170GFP03_06Crop1_merge.tifGFP_y_lr	140905_VizSt_Nup170GFP03_06Crop1_merge.tifGFP_x_bg	140905_VizSt_Nup170GFP03_06Crop1_merge.tifGFP_y_bg	140905_VizSt_Nup170GFP03_05Crop1_merge.tifGFP_x_lc	140905_VizSt_Nup170GFP03_05Crop1_merge.tifGFP_y_lc	140905_VizSt_Nup170GFP03_05Crop1_merge.tifmCh_x_cap	140905_VizSt_Nup170GFP03_05Crop1_merge.tifmCh_y_cap	140905_VizSt_Nup170GFP03_05Crop1_merge.tifGFP_x_lr	140905_VizSt_Nup170GFP03_05Crop1_merge.tifGFP_y_lr	140905_VizSt_Nup170GFP03_05Crop1_merge.tifGFP_x_bg	140905_VizSt_Nup170GFP03_05Crop1_merge.tifGFP_y_bg	140905_VizSt_Nup170GFP03_04Crop1_merge.tifGFP_x_lc	140905_VizSt_Nup170GFP03_04Crop1_merge.tifGFP_y_lc	140905_VizSt_Nup170GFP03_04Crop1_merge.tifmCh_x_cap	140905_VizSt_Nup170GFP03_04Crop1_merge.tifmCh_y_cap	140905_VizSt_Nup170GFP03_04Crop1_merge.tifGFP_x_lr	140905_VizSt_Nup170GFP03_04Crop1_merge.tifGFP_y_lr	140905_VizSt_Nup170GFP03_04Crop1_merge.tifGFP_x_bg	140905_VizSt_Nup170GFP03_04Crop1_merge.tifGFP_y_bg	140905_VizSt_Nup170GFP03_03Crop2_merge.tifGFP_x_lc	140905_VizSt_Nup170GFP03_03Crop2_merge.tifGFP_y_lc	140905_VizSt_Nup170GFP03_03Crop2_merge.tifmCh_x_cap	140905_VizSt_Nup170GFP03_03Crop2_merge.tifmCh_y_cap
					1	0	1142	0	220	0	820	0	143	0	654	0	350	0	640	0	162	0	999	0	421	0	355	0	115	0	254	0	212	0	306	0	122	0	748	0	6	0	490	0	137	0	745	0	452
					2	0.064	861.523	0.064	449.199	0.064	766.199	0.064	128.338	0.064	632.203	0.064	592	0.064	469.672	0.064	148.955	0.064	1045.48	0.064	643.312	0.064	403.663	0.064	116.937	0.064	326.279	0.064	294.279	0.064	312.025	0.064	125.424	0.064	797.64	0.064	15.515	0.064	455.76	0.064	133.508	0.064	1017.65	0.064	714.52
					3	0.128	574.857	0.128	802.41	0.128	674.268	0.128	124.737	0.128	714.851	0.128	816	0.128	399.042	0.128	150.91	0.128	1010.44	0.128	847.417	0.128	409.419	0.128	114.944	0.128	455.467	0.128	369.438	0.128	317.974	0.128	126.342	0.128	901.023	0.128	53.043	0.128	447.574	0.128	114.718	0.128	1220.29	0.128	1037.88
					4	0.192	381.771	0.192	1321.47	0.192	562.039	0.192	137.036	0.192	844.141	0.192	1129	0.192	380.422	0.192	167.003	0.192	825.471	0.192	1051.28	0.192	363.045	0.192	116.633	0.192	633.679	0.192	481.412	0.192	300.964	0.192	118.948	0.192	944.082	0.192	157.872	0.192	442.769	0.192	100.411	0.192	1217.27	0.192	1397.88
					5	0.256	282.469	0.256	1706.86	0.256	495.702	0.256	152.981	0.256	949.176	0.256	1398	0.256	339.939	0.256	181.871	0.256	689.692	0.256	1164.39	0.256	328.393	0.256	125.383	0.256	729.099	0.256	595.386	0.256	280.338	0.256	115.625	0.256	860.365	0.256	354.816	0.256	459.025	0.256	106.987	0.256	1151.03	0.256	1649.44
					6	0.32	229.406	0.32	1861.34	0.32	475.63	0.32	166.638	0.32	971.212	0.32	1453	0.32	313.459	0.32	181.255	0.32	674.958	0.32	1346.38	0.32	280.959	0.32	133.485	0.32	648.035	0.32	659.4	0.32	257.255	0.32	124.101	0.32	768.229	0.32	649.49	0.32	528.67	0.32	128.332	0.32	1075.51	0.32	1787
					7	0.384	208.001	0.384	1843.55	0.384	457.03	0.384	154.352	0.384	888.188	0.384	1639	0.384	325.595	0.384	151.947	0.384	810.682	0.384	1458.05	0.384	244.39	0.384	137.702	0.384	585.737	0.384	714.612	0.384	236.587	0.384	128.812	0.384	671.865	0.384	943.289	0.384	670.836	0.384	152.835	0.384	1060.11	0.384	1800.56
					8	0.448	212.257	0.448	1529.18	0.448	483.39	0.448	147.182	0.448	844.815	0.448	1911	0.448	354.866	0.448	144.039	0.448	931.574	0.448	1467.77	0.448	224.455	0.448	137.073	0.448	535.884	0.448	719.144	0.448	240.407	0.448	123.048	0.448	630.275	0.448	1169.57	0.448	874.809	0.448	144.267	0.448	1069.36	0.448	1775.96
					9	0.512	236.389	0.512	1155.86	0.512	516.86	0.512	137.682	0.512	995.993	0.512	2030	0.512	365.68	0.512	148.276	0.512	925.117	0.512	1521.33	0.512	214.45	0.512	139.068	0.512	484.438	0.512	744.121	0.512	285.007	0.512	118.927	0.512	701.238	0.512	1279.9	0.512	1196.8	0.512	123.397	0.512	1153.61	0.512	1644.52
					10	0.576	250.271	0.576	949.135	0.576	467.67	0.576	125.038	0.576	1018.85	0.576	1920	0.576	337.299	0.576	141.464	0.576	850.71	0.576	1568.27	0.576	236.8	0.576	145.473	0.576	432.877	0.576	800.551	0.576	339.496	0.576	126.227	0.576	812.312	0.576	1349.5	0.576	1058.15	0.576	119.356	0.576	1272.06	0.576	1449.32
					11	0.64	261.869	0.64	1001.78	0.64	413.21	0.64	125.832	0.64	897.941	0.64	1478	0.64	291.351	0.64	142.91	0.64	876.705	0.64	1648.36	0.64	295.95	0.64	133.289	0.64	442.049	0.64	854.91	0.64	385.865	0.64	126.096	0.64	791.505	0.64	1520.58	0.64	982.275	0.64	140.444	0.64	1313.99	0.64	1409
					12	0.704	262.418	0.704	1177.53	0.704	402.26	0.704	123.055	0.704	823.481	0.704	1214	0.704	267.883	0.704	160.734	0.704	923.226	0.704	1712.15	0.704	379.75	0.704	124.459	0.704	504.409	0.704	774.925	0.704	414.543	0.704	117.722	0.704	732.182	0.704	1672.8	0.704	994.115	0.704	153.637	0.704	1195.4	0.704	1504.77
					13	0.768	251.084	0.768	1324.19	0.768	431.35	0.768	123.148	0.768	735.122	0.768	1101	0.768	254.393	0.768	172.025	0.768	1014.76	0.768	1748.69	0.768	426.75	0.768	115.508	0.768	521.054	0.768	605.104	0.768	439.187	0.768	117.908	0.768	762.681	0.768	1760.74	0.768	940.538	0.768	152.088	0.768	1060.88	0.768	1567.94
					14	0.832	231.711	0.832	1360.57	0.832	558.88	0.832	134.165	0.832	608.073	0.832	988	0.832	244.667	0.832	155.321	0.832	1068.64	0.832	1693.65	0.832	465.1	0.832	108.744	0.832	460.653	0.832	458.286	0.832	382.131	0.832	124.47	0.832	768.997	0.832	1643.25	0.832	794.057	0.832	137.874	0.832	974.938	0.832	1522.07
					15	0.896	218.812	0.896	1285.13	0.896	717.24	0.896	154.292	0.896	560.148	0.896	896	0.896	260.015	0.896	157.138	0.896	1099.68	0.896	1713.47	0.896	436.38	0.896	113.914	0.896	382.714	0.896	342.691	0.896	311.413	0.896	122.31	0.896	714.595	0.896	1462.94	0.896	580.168	0.896	140.364	0.896	957.515	0.896	1436.75
					16	0.96	219.834	0.96	1149.84	0.96	890.44	0.96	151.478	0.96	541.861	0.96	840	0.96	298.709	0.96	175.499	0.96	1133.35	0.96	1840.6	0.96	395.918	0.96	120.576	0.96	302.084	0.96	223.821	0.96	260.389	0.96	120.228	0.96	624.999	0.96	1249.69	0.96	441.223	0.96	146.566	0.96	920.255	0.96	1158.68
					17	1.024	213.221	1.024	1013.34	1.024	953.742	1.024	138.018	1.024	599.813	1.024	813	1.024	336.272	1.024	188.2	1.024	1158.63	1.024	1928.72	1.024	392.988	1.024	123.071	NA	NA	NA	NA	1.024	247.52	1.024	121.709	1.024	511.823	1.024	1061.27	1.024	396.091	1.024	142.757	1.024	848.331	1.024	837.535
					18	1.088	209.173	1.088	932.002	1.088	956.506	1.088	139.676	1.088	700.764	1.088	800	1.088	374.895	1.088	184.518	1.088	1224.56	1.088	1950.13	1.088	400.672	1.088	120.597	NA	NA	NA	NA	1.088	230.61	1.088	119.644	1.088	368.083	1.088	1043.31	1.088	451.008	1.088	147.889	1.088	819.833	1.088	569.41
					19	1.152	213.364	1.152	981.85	1.152	820.831	1.152	148.723	1.152	785.911	1.152	810.978	1.152	414.676	1.152	185.336	1.152	1350.85	1.152	1859.05	1.152	402.506	1.152	112.283	NA	NA	NA	NA	1.152	223.76	1.152	113.892	1.152	286.397	1.152	1184.15	1.152	562.357	1.152	159.929	1.152	853.84	NA	NA
					20	1.216	198.743	1.216	1169.84	1.216	731.352	1.216	150	1.216	988.229	1.216	776.737	1.216	446.088	1.216	196.354	1.216	1393.52	1.216	1683.15	1.216	324.787	1.216	100.44	NA	NA	NA	NA	1.216	217.33	1.216	114.159	1.216	270.738	1.216	1376.91	1.216	657.67	1.216	155.406	1.216	901.44	NA	NA
					21	1.28	169.523	1.28	1306.69	1.28	694.948	1.28	151.2	1.28	1189.34	1.28	811.547	1.28	499.375	1.28	192.377	1.28	1185.67	1.28	1552.45	1.28	276.612	1.28	116.047	NA	NA	NA	NA	1.28	219.24	1.28	130.717	1.28	376.744	1.28	1570.04	1.28	649.852	1.28	141.11	NA	NA	NA	NA
					22	1.344	167.398	1.344	1484.21	1.344	677.538	1.344	157.1	1.344	1178.96	1.344	962.968	1.344	515.676	1.344	172.272	1.344	904.541	1.344	1483.3	1.344	249.778	1.344	119.467	NA	NA	NA	NA	1.344	222.43	1.344	135.692	1.344	576.1	1.344	1709.37	1.344	671.879	1.344	139.496	NA	NA	NA	NA
					23	1.408	235.177	1.408	1476.44	1.408	720.498	1.408	151.1	1.408	1026.99	1.408	1133.86	1.408	469.423	1.408	155.119	1.408	667.907	1.408	1268.46	1.408	225.548	1.408	107.896	NA	NA	NA	NA	1.408	232.935	1.408	138.06	1.408	753.401	1.408	1667.66	1.408	810.46	1.408	139.665	NA	NA	NA	NA
					24	1.472	372.469	1.472	1499.21	1.472	684.457	1.472	146.75	1.472	771.109	1.472	1320.34	1.472	471.526	1.472	154.184	NA	NA	1.472	974.571	1.472	235.798	1.472	107.092	NA	NA	NA	NA	1.472	231.817	1.472	129.778	1.472	878.773	1.472	1569.01	1.472	1019.05	1.472	113.828	NA	NA	NA	NA
					25	1.536	567.021	1.536	1333.34	1.536	647.51	1.536	150.7	1.536	569.505	1.536	1363.69	1.536	512.843	1.536	157.013	NA	NA	NA	NA	1.536	254.066	1.536	115.022	NA	NA	NA	NA	1.536	243.986	1.536	118.804	1.536	1005.22	1.536	1477.41	1.536	1111.93	1.536	108.082	NA	NA	NA	NA
					26	1.6	826.478	1.6	1114.16	1.6	667.025	1.6	149.9	1.6	459.948	1.6	1215.05	1.6	495.52	1.6	148.979	NA	NA	NA	NA	1.6	282.214	1.6	123.484	NA	NA	NA	NA	1.6	268.259	1.6	118.774	1.6	1149.09	1.6	1274.46	1.6	1050.01	1.6	92.16	NA	NA	NA	NA
					27	1.664	1153.15	1.664	1002.26	1.664	760.735	1.664	155	1.664	426.579	1.664	1141.17	1.664	499.278	1.664	159.561	NA	NA	NA	NA	1.664	338.09	1.664	119.74	NA	NA	NA	NA	1.664	308.303	1.664	125.565	1.664	1232.55	1.664	995.402	1.664	936.543	1.664	97.94	NA	NA	NA	NA
					28	1.728	1553.06	1.728	980.63	1.728	923.37	1.728	153.05	1.728	472.38	1.728	1090.14	1.728	517.363	1.728	169.29	NA	NA	NA	NA	1.728	411.134	1.728	111.729	NA	NA	NA	NA	1.728	343.15	1.728	125.598	1.728	1199.98	1.728	779.99	1.728	847.479	1.728	130.67	NA	NA	NA	NA
					29	1.792	1686.86	1.792	937.09	1.792	942.904	1.792	139.164	1.792	588.747	1.792	962.854	1.792	530.082	1.792	171.894	NA	NA	NA	NA	1.792	527.889	1.792	99.246	NA	NA	NA	NA	1.792	359.832	1.792	120.341	1.792	1044.38	1.792	643.096	1.792	729.482	1.792	141.89	NA	NA	NA	NA
					30	1.856	580.737	1.856	812.925	1.856	918.98	1.856	125.107	1.856	730.714	1.856	787.157	1.856	515.225	1.856	168.47	NA	NA	NA	NA	1.856	648.044	1.856	91.885	NA	NA	NA	NA	1.856	379.19	1.856	127.859	1.856	900.219	1.856	521.972	1.856	681.84	1.856	140.02	NA	NA	NA	NA
					31	1.92	892.659	1.92	634.757	1.92	869.457	1.92	131.004	1.92	850.385	1.92	657.748	1.92	424.956	1.92	170.314	NA	NA	NA	NA	1.92	654.931	1.92	97.108	NA	NA	NA	NA	1.92	399.159	1.92	129.36	1.92	824.348	1.92	390.95	1.92	688.89	1.92	140.99	NA	NA	NA	NA
					32	1.984	1325.25	NA	NA	1.984	787.058	1.984	150.89	1.984	899.433	1.984	549.559	1.984	353.934	1.984	163.789	NA	NA	NA	NA	1.984	614.658	1.984	106.344	NA	NA	NA	NA	1.984	409.775	1.984	117.69	1.984	713.196	1.984	287.337	1.984	616.973	NA	NA	NA	NA	NA	NA
					33	2.048	1790.09	NA	NA	2.048	741.536	2.048	165.762	2.048	902.976	2.048	592.047	2.048	331.828	2.048	148.593	NA	NA	NA	NA	2.048	598.192	2.048	109.567	NA	NA	NA	NA	2.048	394.184	2.048	110.024	2.048	604.807	2.048	231.16	2.048	492.781	NA	NA	NA	NA	NA	NA
					34	2.112	1922.33	NA	NA	2.112	686.913	2.112	150.688	2.112	910.674	2.112	624.602	2.112	386.937	2.112	162.632	NA	NA	NA	NA	2.112	532.367	2.112	111.589	NA	NA	NA	NA	2.112	389.626	2.112	104.914	2.112	579.739	2.112	238.461	2.112	538.105	NA	NA	NA	NA	NA	NA
					35	2.176	1881.26	NA	NA	2.176	662.62	2.176	135.662	2.176	848.594	NA	NA	2.176	462.038	2.176	166.709	NA	NA	NA	NA	2.176	463.568	2.176	118.801	NA	NA	NA	NA	2.176	433.397	2.176	102.085	2.176	641.298	2.176	216.02	2.176	548.54	NA	NA	NA	NA	NA	NA
					36	2.24	1741.13	NA	NA	2.24	661.96	2.24	146.058	2.24	852.752	NA	NA	2.24	490.742	NA	NA	NA	NA	NA	NA	2.24	370.955	2.24	127.623	NA	NA	NA	NA	2.24	473.586	2.24	105.938	NA	NA	NA	NA	2.24	540.017	NA	NA	NA	NA	NA	NA
					37	2.304	1612.67	NA	NA	2.304	620.527	2.304	150.513	2.304	803.555	NA	NA	2.304	469.954	NA	NA	NA	NA	NA	NA	2.304	301.505	2.304	129.602	NA	NA	NA	NA	2.304	479.183	2.304	108.44	NA	NA	NA	NA	2.304	573.794	NA	NA	NA	NA	NA	NA
					38	2.368	1609.36	NA	NA	2.368	542.814	2.368	154.407	2.368	734.075	NA	NA	2.368	438.697	NA	NA	NA	NA	NA	NA	2.368	270.426	2.368	107.767	NA	NA	NA	NA	2.368	459.211	2.368	117.694	NA	NA	NA	NA	2.368	674.938	NA	NA	NA	NA	NA	NA
					39	2.432	1681.83	NA	NA	2.432	477.778	2.432	144.444	2.432	729.02	NA	NA	2.432	417.825	NA	NA	NA	NA	NA	NA	2.432	240.617	2.432	90.275	NA	NA	NA	NA	2.432	435.214	2.432	135.305	NA	NA	NA	NA	2.432	772.118	NA	NA	NA	NA	NA	NA
					40	2.496	1723.38	NA	NA	2.496	455.989	2.496	138.132	2.496	774.333	NA	NA	2.496	419.302	NA	NA	NA	NA	NA	NA	2.496	234.721	2.496	91.258	NA	NA	NA	NA	2.496	389.089	2.496	135.511	NA	NA	NA	NA	2.496	761.757	NA	NA	NA	NA	NA	NA
					41	NA	NA	NA	NA	2.56	488.097	2.56	132.023	NA	NA	NA	NA	2.56	448.036	NA	NA	NA	NA	NA	NA	2.56	254.606	2.56	98.261	NA	NA	NA	NA	2.56	334.445	2.56	127.454	NA	NA	NA	NA	2.56	650.349	NA	NA	NA	NA	NA	NA
					42	NA	NA	NA	NA	2.624	567.945	2.624	126.424	NA	NA	NA	NA	2.624	423.11	NA	NA	NA	NA	NA	NA	2.624	298.978	2.624	107.056	NA	NA	NA	NA	2.624	312.273	2.624	113.255	NA	NA	NA	NA	2.624	542.303	NA	NA	NA	NA	NA	NA
					43	NA	NA	NA	NA	2.688	755.224	2.688	137.487	NA	NA	NA	NA	2.688	392.376	NA	NA	NA	NA	NA	NA	2.688	340.305	2.688	114.538	NA	NA	NA	NA	2.688	307.223	2.688	112.485	NA	NA	NA	NA	2.688	472.286	NA	NA	NA	NA	NA	NA
					44	NA	NA	NA	NA	2.752	939.924	2.752	147.525	NA	NA	NA	NA	2.752	334.428	NA	NA	NA	NA	NA	NA	2.752	319.093	2.752	118.026	NA	NA	NA	NA	2.752	311.48	2.752	110.364	NA	NA	NA	NA	2.752	562.193	NA	NA	NA	NA	NA	NA
					45	NA	NA	NA	NA	2.816	1035.84	2.816	139.495	NA	NA	NA	NA	2.816	309.19	NA	NA	NA	NA	NA	NA	2.816	360.273	2.816	120.626	NA	NA	NA	NA	2.816	297.92	2.816	113.381	NA	NA	NA	NA	2.816	726.111	NA	NA	NA	NA	NA	NA
					46	NA	NA	NA	NA	2.88	1044.27	2.88	139.604	NA	NA	NA	NA	2.88	337.181	NA	NA	NA	NA	NA	NA	2.88	454.802	2.88	116	NA	NA	NA	NA	2.88	298.76	2.88	114.716	NA	NA	NA	NA	2.88	768.709	NA	NA	NA	NA	NA	NA
					47	NA	NA	NA	NA	2.944	961.763	2.944	137.105	NA	NA	NA	NA	2.944	369.554	NA	NA	NA	NA	NA	NA	2.944	529.107	2.944	105.415	NA	NA	NA	NA	2.944	357.12	2.944	112.222	NA	NA	NA	NA	2.944	729.961	NA	NA	NA	NA	NA	NA
					48	NA	NA	NA	NA	3.008	796.566	3.008	128.84	NA	NA	NA	NA	3.008	402.989	NA	NA	NA	NA	NA	NA	3.008	601.199	3.008	100.184	NA	NA	NA	NA	3.008	446.52	3.008	119.438	NA	NA	NA	NA	3.008	677.372	NA	NA	NA	NA	NA	NA
					49	NA	NA	NA	NA	3.072	655.547	3.072	123.82	NA	NA	NA	NA	3.072	431.984	NA	NA	NA	NA	NA	NA	3.072	602.504	3.072	114.133	NA	NA	NA	NA	3.072	495.72	3.072	121.36	NA	NA	NA	NA	3.072	644.378	NA	NA	NA	NA	NA	NA
					50	NA	NA	NA	NA	3.136	611.741	3.136	124.664	NA	NA	NA	NA	3.136	474.869	NA	NA	NA	NA	NA	NA	3.136	540.412	3.136	127.934	NA	NA	NA	NA	3.136	467.043	3.136	124.145	NA	NA	NA	NA	3.136	600.806	NA	NA	NA	NA	NA	NA
					51	NA	NA	NA	NA	3.2	728.526	3.2	124.017	NA	NA	NA	NA	3.2	526.554	NA	NA	NA	NA	NA	NA	3.2	509.835	3.2	126.093	NA	NA	NA	NA	3.2	467.752	3.2	133.912	NA	NA	NA	NA	3.2	606.857	NA	NA	NA	NA	NA	NA
					52	NA	NA	NA	NA	3.264	950.559	3.264	131.299	NA	NA	NA	NA	3.264	546.342	NA	NA	NA	NA	NA	NA	3.264	464.405	3.264	128.053	NA	NA	NA	NA	3.264	374.976	3.264	142.76	NA	NA	NA	NA	3.264	566.461	NA	NA	NA	NA	NA	NA
					53	NA	NA	NA	NA	3.328	1121.42	3.328	135.154	NA	NA	NA	NA	3.328	520.089	NA	NA	NA	NA	NA	NA	3.328	478.833	3.328	125.114	NA	NA	NA	NA	3.328	318.372	3.328	144.86	NA	NA	NA	NA	3.328	512.119	NA	NA	NA	NA	NA	NA
					54	NA	NA	NA	NA	3.392	1120.22	3.392	138.052	NA	NA	NA	NA	3.392	503.934	NA	NA	NA	NA	NA	NA	3.392	532.488	3.392	118.062	NA	NA	NA	NA	3.392	293.404	3.392	143.75	NA	NA	NA	NA	3.392	551.325	NA	NA	NA	NA	NA	NA
					55	NA	NA	NA	NA	3.456	931.786	3.456	138.828	NA	NA	NA	NA	3.456	540.4	NA	NA	NA	NA	NA	NA	3.456	518.158	3.456	117.758	NA	NA	NA	NA	3.456	274.579	3.456	138	NA	NA	NA	NA	3.456	570.983	NA	NA	NA	NA	NA	NA
					56	NA	NA	NA	NA	3.52	766.229	3.52	124.757	NA	NA	NA	NA	3.52	545.6	NA	NA	NA	NA	NA	NA	3.52	466.504	NA	NA	NA	NA	NA	NA	3.52	274.318	3.52	135.16	NA	NA	NA	NA	3.52	549.02	NA	NA	NA	NA	NA	NA
					57	NA	NA	NA	NA	3.584	661.817	3.584	120.77	NA	NA	NA	NA	NA	NA	NA	NA	NA	NA	NA	NA	3.584	428.295	NA	NA	NA	NA	NA	NA	3.584	303.347	3.584	136.97	NA	NA	NA	NA	3.584	462.558	NA	NA	NA	NA	NA	NA
					58	NA	NA	NA	NA	3.648	577.036	3.648	117.374	NA	NA	NA	NA	NA	NA	NA	NA	NA	NA	NA	NA	3.648	420.205	NA	NA	NA	NA	NA	NA	3.648	358.195	3.648	129.63	NA	NA	NA	NA	3.648	436.32	NA	NA	NA	NA	NA	NA
					59	NA	NA	NA	NA	NA	NA	3.712	112.904	NA	NA	NA	NA	NA	NA	NA	NA	NA	NA	NA	NA	3.712	444.684	NA	NA	NA	NA	NA	NA	3.712	433.182	3.712	127.57	NA	NA	NA	NA	3.712	500.12	NA	NA	NA	NA	NA	NA
					60	NA	NA	NA	NA	NA	NA	3.776	123.557	NA	NA	NA	NA	NA	NA	NA	NA	NA	NA	NA	NA	3.776	452.797	NA	NA	NA	NA	NA	NA	3.776	450.587	3.776	134.25	NA	NA	NA	NA	3.776	594.83	NA	NA	NA	NA	NA	NA
					61	NA	NA	NA	NA	NA	NA	3.84	128.127	NA	NA	NA	NA	NA	NA	NA	NA	NA	NA	NA	NA	3.84	510.425	NA	NA	NA	NA	NA	NA	3.84	420.272	3.84	136.05	NA	NA	NA	NA	NA	NA	NA	NA	NA	NA	NA	NA
					62	NA	NA	NA	NA	NA	NA	3.904	134.857	NA	NA	NA	NA	NA	NA	NA	NA	NA	NA	NA	NA	3.904	510.9	NA	NA	NA	NA	NA	NA	3.904	426.141	NA	NA	NA	NA	NA	NA	NA	NA	NA	NA	NA	NA	NA	NA
					63	NA	NA	NA	NA	NA	NA	3.968	136.284	NA	NA	NA	NA	NA	NA	NA	NA	NA	NA	NA	NA	3.968	472.514	NA	NA	NA	NA	NA	NA	3.968	450.247	NA	NA	NA	NA	NA	NA	NA	NA	NA	NA	NA	NA	NA	NA
					64	NA	NA	NA	NA	NA	NA	4.032	145.515	NA	NA	NA	NA	NA	NA	NA	NA	NA	NA	NA	NA	4.032	488.987	NA	NA	NA	NA	NA	NA	4.032	445.392	NA	NA	NA	NA	NA	NA	NA	NA	NA	NA	NA	NA	NA	NA
					65	NA	NA	NA	NA	NA	NA	NA	NA	NA	NA	NA	NA	NA	NA	NA	NA	NA	NA	NA	NA	4.096	556.881	NA	NA	NA	NA	NA	NA	4.096	392.251	NA	NA	NA	NA	NA	NA	NA	NA	NA	NA	NA	NA	NA	NA
					66	NA	NA	NA	NA	NA	NA	NA	NA	NA	NA	NA	NA	NA	NA	NA	NA	NA	NA	NA	NA	4.16	644.274	NA	NA	NA	NA	NA	NA	4.16	283.965	NA	NA	NA	NA	NA	NA	NA	NA	NA	NA	NA	NA	NA	NA
					67	NA	NA	NA	NA	NA	NA	NA	NA	NA	NA	NA	NA	NA	NA	NA	NA	NA	NA	NA	NA	4.224	659.116	NA	NA	NA	NA	NA	NA	4.224	200.05	NA	NA	NA	NA	NA	NA	NA	NA	NA	NA	NA	NA	NA	NA
					68	NA	NA	NA	NA	NA	NA	NA	NA	NA	NA	NA	NA	NA	NA	NA	NA	NA	NA	NA	NA	4.288	527.547	NA	NA	NA	NA	NA	NA	4.288	151.237	NA	NA	NA	NA	NA	NA	NA	NA	NA	NA	NA	NA	NA	NA
					69	NA	NA	NA	NA	NA	NA	NA	NA	NA	NA	NA	NA	NA	NA	NA	NA	NA	NA	NA	NA	4.352	419.395	NA	NA	NA	NA	NA	NA	NA	NA	NA	NA	NA	NA	NA	NA	NA	NA	NA	NA	NA	NA	NA	NA
					70	NA	NA	NA	NA	NA	NA	NA	NA	NA	NA	NA	NA	NA	NA	NA	NA	NA	NA	NA	NA	4.416	305.735	NA	NA	NA	NA	NA	NA	NA	NA	NA	NA	NA	NA	NA	NA	NA	NA	NA	NA	NA	NA	NA	NA
					71	NA	NA	NA	NA	NA	NA	NA	NA	NA	NA	NA	NA	NA	NA	NA	NA	NA	NA	NA	NA	4.48	259.238	NA	NA	NA	NA	NA	NA	NA	NA	NA	NA	NA	NA	NA	NA	NA	NA	NA	NA	NA	NA	NA	NA
					72	NA	NA	NA	NA	NA	NA	NA	NA	NA	NA	NA	NA	NA	NA	NA	NA	NA	NA	NA	NA	4.544	274.49	NA	NA	NA	NA	NA	NA	NA	NA	NA	NA	NA	NA	NA	NA	NA	NA	NA	NA	NA	NA	NA	NA
					73	NA	NA	NA	NA	NA	NA	NA	NA	NA	NA	NA	NA	NA	NA	NA	NA	NA	NA	NA	NA	4.608	251.72	NA	NA	NA	NA	NA	NA	NA	NA	NA	NA	NA	NA	NA	NA	NA	NA	NA	NA	NA	NA	NA	NA
					74	NA	NA	NA	NA	NA	NA	NA	NA	NA	NA	NA	NA	NA	NA	NA	NA	NA	NA	NA	NA	4.672	190.871	NA	NA	NA	NA	NA	NA	NA	NA	NA	NA	NA	NA	NA	NA	NA	NA	NA	NA	NA	NA	NA	NA
					75	NA	NA	NA	NA	NA	NA	NA	NA	NA	NA	NA	NA	NA	NA	NA	NA	NA	NA	NA	NA	4.736	183.028	NA	NA	NA	NA	NA	NA	NA	NA	NA	NA	NA	NA	NA	NA	NA	NA	NA	NA	NA	NA	NA	NA
					76	NA	NA	NA	NA	NA	NA	NA	NA	NA	NA	NA	NA	NA	NA	NA	NA	NA	NA	NA	NA	4.8	189.283	NA	NA	NA	NA	NA	NA	NA	NA	NA	NA	NA	NA	NA	NA	NA	NA	NA	NA	NA	NA	NA	NA
					77	NA	NA	NA	NA	NA	NA	NA	NA	NA	NA	NA	NA	NA	NA	NA	NA	NA	NA	NA	NA	4.864	234.762	NA	NA	NA	NA	NA	NA	NA	NA	NA	NA	NA	NA	NA	NA	NA	NA	NA	NA	NA	NA	NA	NA
					78	NA	NA	NA	NA	NA	NA	NA	NA	NA	NA	NA	NA	NA	NA	NA	NA	NA	NA	NA	NA	4.928	300.879	NA	NA	NA	NA	NA	NA	NA	NA	NA	NA	NA	NA	NA	NA	NA	NA	NA	NA	NA	NA	NA	NA
					79	NA	NA	NA	NA	NA	NA	NA	NA	NA	NA	NA	NA	NA	NA	NA	NA	NA	NA	NA	NA	4.992	373.856	NA	NA	NA	NA	NA	NA	NA	NA	NA	NA	NA	NA	NA	NA	NA	NA	NA	NA	NA	NA	NA	NA
[truncated: 284 more columns]

## Sheet: Mlp1
Mlp1-GFP						1								2								3								4								5								6
						Ic				Ir		Ibg		Ic				Ir		Ibg		Ic				Ir		Ibg		Ic				Ir		Ibg		Ic				Ir		Ibg		Ic
							313.769				560.979		154.462		334.507				790.925		153.843		414.442				806.097		174.043		217.35				307.12		146.788		264.038				527.96		151.927		469.481
							159.307								180.663								240.399								70.5619								112.111								317.132
	average	median	SEM	n		Relative accumulation (RA)					406.517			Relative accumulation (RA)					637.082			Relative accumulation (RA)					632.054			Relative accumulation (RA)					160.332			Relative accumulation (RA)					376.033			Relative accumulation (RA)
RA:	0.442605	0.406112	0.0266206	56		0.391882								0.283579								0.380346								0.440098								0.298142								0.669288
	p-value
	3.20615e-18
						150109_VisSt_Mlp1GFP02_01Crop_1.tifGFP_x_lc	150109_VisSt_Mlp1GFP02_01Crop_1.tifGFP_y_lc	150109_VisSt_Mlp1GFP02_01Crop_1.tifmCh_x_cap	150109_VisSt_Mlp1GFP02_01Crop_1.tifmCh_y_cap	150109_VisSt_Mlp1GFP02_01Crop_1.tifGFP_x_lr	150109_VisSt_Mlp1GFP02_01Crop_1.tifGFP_y_lr	150109_VisSt_Mlp1GFP02_01Crop_1.tifGFP_x_bg	150109_VisSt_Mlp1GFP02_01Crop_1.tifGFP_y_bg	150109_VisSt_Mlp1GFP02_01Crop_2.tifGFP_x_lc	150109_VisSt_Mlp1GFP02_01Crop_2.tifGFP_y_lc	150109_VisSt_Mlp1GFP02_01Crop_2.tifmCh_x_cap	150109_VisSt_Mlp1GFP02_01Crop_2.tifmCh_y_cap	150109_VisSt_Mlp1GFP02_01Crop_2.tifGFP_x_lr	150109_VisSt_Mlp1GFP02_01Crop_2.tifGFP_y_lr	150109_VisSt_Mlp1GFP02_01Crop_2.tifGFP_x_bg	150109_VisSt_Mlp1GFP02_01Crop_2.tifGFP_y_bg	150109_VisSt_Mlp1GFP02_02Crop_1.tifGFP_x_lc	150109_VisSt_Mlp1GFP02_02Crop_1.tifGFP_y_lc	150109_VisSt_Mlp1GFP02_02Crop_1.tifmCh_x_cap	150109_VisSt_Mlp1GFP02_02Crop_1.tifmCh_y_cap	150109_VisSt_Mlp1GFP02_02Crop_1.tifGFP_x_lr	150109_VisSt_Mlp1GFP02_02Crop_1.tifGFP_y_lr	150109_VisSt_Mlp1GFP02_02Crop_1.tifGFP_x_bg	150109_VisSt_Mlp1GFP02_02Crop_1.tifGFP_y_bg	150109_VisSt_Mlp1GFP02_02Crop_3.tifGFP_x_lc	150109_VisSt_Mlp1GFP02_02Crop_3.tifGFP_y_lc	150109_VisSt_Mlp1GFP02_02Crop_3.tifmCh_x_cap	150109_VisSt_Mlp1GFP02_02Crop_3.tifmCh_y_cap	150109_VisSt_Mlp1GFP02_02Crop_3.tifGFP_x_lr	150109_VisSt_Mlp1GFP02_02Crop_3.tifGFP_y_lr	150109_VisSt_Mlp1GFP02_02Crop_3.tifGFP_x_bg	150109_VisSt_Mlp1GFP02_02Crop_3.tifGFP_y_bg	150109_VisSt_Mlp1GFP02_03Crop_1.tifGFP_x_lc	150109_VisSt_Mlp1GFP02_03Crop_1.tifGFP_y_lc	150109_VisSt_Mlp1GFP02_03Crop_1.tifmCh_x_cap	150109_VisSt_Mlp1GFP02_03Crop_1.tifmCh_y_cap	150109_VisSt_Mlp1GFP02_03Crop_1.tifGFP_x_lr	150109_VisSt_Mlp1GFP02_03Crop_1.tifGFP_y_lr	150109_VisSt_Mlp1GFP02_03Crop_1.tifGFP_x_bg	150109_VisSt_Mlp1GFP02_03Crop_1.tifGFP_y_bg	150109_VisSt_Mlp1GFP02_04Crop_1.tifGFP_x_lc	150109_VisSt_Mlp1GFP02_04Crop_1.tifGFP_y_lc	150109_VisSt_Mlp1GFP02_04Crop_1.tifmCh_x_cap	150109_VisSt_Mlp1GFP02_04Crop_1.tifmCh_y_cap
					1	0	351	0	397	0	258	0	173	0	394	0	155	0	744	0	153	0	388	0	518	0	688	0	160	0	127	0	137	0	262	0	145	0	485	0	855	0	412	0	127	0	250	0	149
					2	0.064	371.386	0.064	583.396	0.064	378.097	0.064	158.924	0.064	331.821	0.064	267.238	0.064	776.517	0.064	146.647	0.064	357.943	0.064	831.302	0.064	819.412	0.064	171.685	0.064	139.81	0.064	164.319	0.064	263.027	0.064	129.423	0.064	401.699	0.064	1127.94	0.064	595	0.064	133	0.064	195.896	0.064	276.164
					3	0.128	346.754	0.128	740.965	0.128	566.895	0.128	144.658	0.128	347.573	0.128	410.091	0.128	850.434	0.128	131.271	0.128	349.412	0.128	1083.12	0.128	868.046	0.128	181.113	0.128	150.021	0.128	179.586	0.128	286.16	0.128	127.104	0.128	313.585	0.128	1273.99	0.128	649	0.128	141	0.128	150.537	0.128	507.384
					4	0.192	305.014	0.192	875.788	0.192	698.206	0.192	134.634	0.192	422.316	0.192	501.449	0.192	829.268	0.192	137.044	0.192	313.794	0.192	1216.54	0.192	906.253	0.192	197.564	0.192	153.547	0.192	191.813	0.192	341.74	0.192	145.633	0.192	252.847	0.192	1325.94	0.192	600	0.192	157.135	0.192	125.324	0.192	860.219
					5	0.256	308.957	0.256	938.293	0.256	892.649	0.256	144.629	0.256	443.629	0.256	541.382	0.256	813.892	0.256	149.549	0.256	316.56	0.256	1273.97	0.256	818.476	0.256	191.548	0.256	162.777	0.256	224.988	0.256	355.677	0.256	157.989	0.256	225.473	0.256	1375.28	0.256	429	0.256	163.318	0.256	133.098	0.256	1273.22
					6	0.32	314.143	0.32	910.739	0.32	987.002	0.32	160.206	0.32	455.743	0.32	589.89	0.32	878.513	0.32	143.619	0.32	341.001	0.32	1308.81	0.32	722.124	0.32	186.635	0.32	154.296	0.32	247.279	0.32	338.223	0.32	153.343	0.32	212.937	0.32	1388.72	0.32	328	0.32	149.215	0.32	160.777	0.32	1528.48
					7	0.384	287.073	0.384	866.024	0.384	1012.07	0.384	169.994	0.384	496.193	0.384	622.666	0.384	948.273	0.384	148.958	0.384	344.57	0.384	1404.03	0.384	654.14	0.384	180.987	0.384	144.628	0.384	253.449	0.384	293.55	0.384	153.109	0.384	221.09	0.384	1440.58	0.384	347	0.384	141.798	0.384	230.608	0.384	1548.01
					8	0.448	324.536	0.448	825.802	0.448	861.008	0.448	178.736	0.448	519.307	0.448	678.72	0.448	1043.7	0.448	158.04	0.448	351.222	0.448	1467.51	0.448	642.222	0.448	161.862	0.448	147.955	0.448	253.546	0.448	268.906	0.448	153.751	0.448	253.939	0.448	1426.88	0.448	437	0.448	137.613	0.448	356.75	0.448	1534.27
					9	0.512	398.403	0.512	782.621	0.512	651.862	0.512	168.424	0.512	582.129	0.512	785.922	0.512	1119.38	0.512	167.254	0.512	366.994	0.512	1493.07	0.512	694.458	0.512	154.146	0.512	160.197	0.512	254.619	0.512	242.633	0.512	152.408	0.512	267.632	0.512	1393.97	0.512	652	0.512	127.888	0.512	560.976	0.512	1551.93
					10	0.576	466.886	0.576	740.665	0.576	439.265	0.576	155.053	0.576	680.026	0.576	781.391	0.576	1111.48	0.576	183.216	0.576	382.146	0.576	1501.41	0.576	750.709	0.576	164.865	0.576	160.008	0.576	280.367	0.576	211.958	0.576	157.808	0.576	239.386	0.576	1392.97	0.576	1014	0.576	131.963	0.576	781.751	0.576	1470.3
					11	0.64	573.988	0.64	710.974	0.64	335.834	0.64	152.016	0.64	551.016	0.64	747.599	0.64	845.502	0.64	172.637	0.64	381.408	0.64	1496.8	0.64	856.965	0.64	156.087	0.64	164.858	0.64	283.192	0.64	194.563	0.64	156.237	0.64	209.501	0.64	1291.32	0.64	1296	0.64	145.652	0.64	850.587	0.64	1199.44
					12	0.704	659.855	0.704	699.878	0.704	327.567	0.704	154.204	0.704	417.575	0.704	719.856	0.704	765.125	0.704	171.21	0.704	374.764	0.704	1513.23	0.704	951.425	0.704	151.7	0.704	192.132	0.704	266.53	0.704	197.41	0.704	153.035	0.704	179.298	0.704	1207.02	0.704	1074	0.704	127.692	0.704	876.718	0.704	799.06
					13	0.768	578.422	0.768	683.654	0.768	361.046	0.768	149.711	0.768	328.174	0.768	688.57	0.768	772.149	0.768	179.378	0.768	385.915	0.768	1595.68	0.768	1034.57	0.768	169.189	0.768	231.796	0.768	263.436	0.768	214.97	0.768	150.711	0.768	168.809	0.768	1058.65	0.768	979.624	0.768	121.693	0.768	823.837	0.768	439.35
					14	0.832	415.975	0.832	669.224	0.832	455.146	0.832	141.68	0.832	277.252	0.832	678.06	0.832	807.782	0.832	176.373	0.832	368.602	0.832	1631.65	0.832	1199.04	0.832	177.555	0.832	293.221	0.832	268.054	0.832	222.86	0.832	142.642	0.832	155.255	0.832	934.111	0.832	783.422	0.832	138.452	0.832	741.95	NA	NA
					15	0.896	309.99	0.896	677.728	0.896	576.269	0.896	147.141	0.896	299.131	0.896	704.59	0.896	787.845	0.896	165.412	0.896	333.281	0.896	1619.1	0.896	1189.32	0.896	186.096	0.896	367.019	0.896	258.869	0.896	221.43	0.896	137.103	0.896	138.018	0.896	810.17	0.896	628.02	0.896	164.441	0.896	634.494	NA	NA
					16	0.96	236.018	0.96	670.331	0.96	629.465	0.96	147.385	0.96	361.805	0.96	708.26	0.96	641.311	0.96	150.777	0.96	327.452	0.96	1620.21	0.96	1037.28	0.96	186.214	0.96	403.972	0.96	259.194	0.96	210.17	0.96	141.638	0.96	133.503	NA	NA	0.96	549.629	0.96	163.621	0.96	572.945	NA	NA
					17	1.024	178.276	1.024	625.451	1.024	608.673	1.024	141.125	1.024	444.782	1.024	708.48	1.024	544.475	1.024	135.603	1.024	338.653	1.024	1728.32	1.024	805.203	1.024	177.011	1.024	397.699	1.024	267.865	1.024	192.88	1.024	142.208	1.024	139.618	NA	NA	1.024	581.717	1.024	176.66	1.024	534.932	NA	NA
					18	1.088	162.605	1.088	533.542	1.088	553.072	1.088	138.952	1.088	492.909	1.088	687.69	1.088	586.746	1.088	136.117	1.088	400.787	1.088	1748.71	1.088	630.786	1.088	172.992	1.088	325.338	1.088	282.167	1.088	177.45	1.088	136.343	1.088	146.19	NA	NA	1.088	534.862	1.088	169.002	NA	NA	NA	NA
					19	1.152	168.454	1.152	408.368	1.152	445.425	1.152	155.279	1.152	492.54	1.152	622.84	1.152	643.793	1.152	151.487	1.152	537.503	1.152	1689.41	1.152	619	1.152	177.705	1.152	260.791	1.152	305.003	1.152	164.16	1.152	142.874	1.152	156.777	NA	NA	1.152	464.976	1.152	152.51	NA	NA	NA	NA
					20	1.216	170.818	1.216	277.159	1.216	398.774	1.216	164.499	1.216	342.036	1.216	513.03	1.216	719.743	1.216	156.324	1.216	637.095	1.216	1443.44	1.216	639.467	1.216	163.999	1.216	238.873	1.216	328.79	1.216	167.55	1.216	145.507	1.216	161.172	NA	NA	1.216	410.519	1.216	132.758	NA	NA	NA	NA
					21	1.28	173.995	1.28	164.712	1.28	441.007	1.28	167.424	1.28	245.595	NA	NA	1.28	787.349	1.28	150.346	1.28	718.159	1.28	1124.2	1.28	770.098	1.28	166.385	1.28	244.554	1.28	333.645	1.28	169.44	1.28	146.529	1.28	154.858	NA	NA	1.28	364.201	1.28	135.773	NA	NA	NA	NA
					22	1.344	169.492	NA	NA	1.344	569.834	1.344	162.891	1.344	209.365	NA	NA	1.344	854.394	1.344	149.252	1.344	793.096	1.344	930.296	1.344	807.757	1.344	175.251	1.344	214.183	1.344	352.641	1.344	167.71	1.344	143.975	1.344	165.528	NA	NA	1.344	361.464	1.344	148.802	NA	NA	NA	NA
					23	1.408	155.029	NA	NA	1.408	653.734	1.408	154.493	1.408	192.794	NA	NA	1.408	851.574	1.408	136.77	1.408	760.048	1.408	838.964	1.408	851.001	1.408	174.396	1.408	185.221	1.408	368.558	1.408	171.85	1.408	139.853	1.408	196.717	NA	NA	1.408	388.186	1.408	151.072	NA	NA	NA	NA
					24	1.472	145.234	NA	NA	1.472	675.151	1.472	146.571	1.472	170.713	NA	NA	1.472	835.126	1.472	118.362	1.472	649.237	1.472	666.276	1.472	919.945	1.472	169.102	1.472	172.834	1.472	349.503	1.472	171.15	1.472	145.626	1.472	204.997	NA	NA	1.472	445.846	1.472	160.082	NA	NA	NA	NA
					25	1.536	148.022	NA	NA	1.536	679.652	1.536	147.558	1.536	169.989	NA	NA	1.536	868.697	1.536	114.336	1.536	472.512	1.536	447.562	1.536	933.201	1.536	162.785	1.536	163.591	1.536	342.848	1.536	188.95	1.536	166.675	1.536	235.85	NA	NA	1.536	470.887	1.536	168.05	NA	NA	NA	NA
					26	1.6	156.606	NA	NA	1.6	631.318	1.6	159.765	1.6	193.053	NA	NA	1.6	891.801	1.6	137.441	1.6	398.9	1.6	251.969	1.6	906.852	1.6	166.193	1.6	156.05	1.6	343.997	1.6	219.39	1.6	162.502	1.6	311.51	NA	NA	1.6	415.783	1.6	162.072	NA	NA	NA	NA
					27	1.664	158.637	NA	NA	1.664	500.896	1.664	170.77	1.664	195.433	NA	NA	1.664	825.886	1.664	157.08	1.664	372.607	NA	NA	1.664	814.587	1.664	169.526	1.664	162.584	1.664	345.77	1.664	236.7	1.664	136.075	1.664	359.09	NA	NA	1.664	353.878	1.664	173.346	NA	NA	NA	NA
					28	1.728	171.612	NA	NA	1.728	438.005	1.728	169.387	1.728	184.664	NA	NA	1.728	701.115	1.728	157.122	1.728	333.391	NA	NA	1.728	801.478	1.728	171.341	1.728	179.847	1.728	345.301	1.728	262.042	1.728	128.424	1.728	411.8	NA	NA	1.728	337.854	1.728	167.821	NA	NA	NA	NA
					29	1.792	241.613	NA	NA	1.792	447.623	1.792	169.13	1.792	171.135	NA	NA	1.792	659.488	1.792	165.644	1.792	310.572	NA	NA	1.792	813.655	1.792	172.966	1.792	224.983	1.792	351.933	1.792	304.972	1.792	129.894	1.792	457.93	NA	NA	1.792	321.763	1.792	157.684	NA	NA	NA	NA
					30	1.856	321.288	NA	NA	1.856	550.148	1.856	158.953	1.856	168.675	NA	NA	1.856	697.626	1.856	183.584	1.856	306.16	NA	NA	1.856	709.851	1.856	167.882	1.856	276.789	1.856	381.325	1.856	334.883	1.856	133.305	1.856	452.21	NA	NA	1.856	275.919	1.856	158.224	NA	NA	NA	NA
					31	1.92	403.613	NA	NA	1.92	613.633	1.92	152.596	1.92	184.558	NA	NA	1.92	739.93	1.92	176.564	1.92	299.8	NA	NA	1.92	604.091	1.92	152.746	1.92	342.911	1.92	383.528	1.92	315.113	1.92	130.06	1.92	447.418	NA	NA	1.92	284.525	1.92	152.605	NA	NA	NA	NA
					32	1.984	435.048	NA	NA	1.984	561.681	1.984	155.679	1.984	198.923	NA	NA	1.984	763.451	1.984	156.412	1.984	250.56	NA	NA	1.984	556.481	1.984	136.291	1.984	440.166	1.984	368.562	1.984	298.032	1.984	139.527	1.984	446.186	NA	NA	1.984	339.953	1.984	149.998	NA	NA	NA	NA
					33	2.048	396.913	NA	NA	2.048	464.605	2.048	165.491	2.048	214.709	NA	NA	2.048	679.393	2.048	146.821	NA	NA	NA	NA	2.048	585.309	2.048	133.23	2.048	474.692	2.048	384.342	2.048	268.651	2.048	149.166	2.048	404.404	NA	NA	2.048	394.83	2.048	153.268	NA	NA	NA	NA
					34	2.112	332.191	NA	NA	2.112	409.686	2.112	168.398	2.112	193.659	NA	NA	2.112	505.685	2.112	152.589	NA	NA	NA	NA	NA	NA	2.112	152.797	2.112	405.456	2.112	411.029	2.112	239.853	2.112	151.302	2.112	364.278	NA	NA	2.112	429.768	2.112	176.043	NA	NA	NA	NA
					35	2.176	265.105	NA	NA	NA	NA	2.176	156.73	NA	NA	NA	NA	NA	NA	2.176	155.167	NA	NA	NA	NA	NA	NA	2.176	177.788	2.176	298.743	2.176	388.22	2.176	226.718	2.176	148.197	2.176	292.799	NA	NA	NA	NA	2.176	170.923	NA	NA	NA	NA
					36	2.24	273.18	NA	NA	NA	NA	2.24	146.086	NA	NA	NA	NA	NA	NA	2.24	159.795	NA	NA	NA	NA	NA	NA	2.24	177.832	2.24	222.772	2.24	386.283	2.24	215.151	2.24	146.56	2.24	231.192	NA	NA	NA	NA	2.24	147.871	NA	NA	NA	NA
					37	2.304	294.965	NA	NA	NA	NA	2.304	144.989	NA	NA	NA	NA	NA	NA	2.304	161.56	NA	NA	NA	NA	NA	NA	2.304	182.521	2.304	184.366	2.304	393.171	2.304	209.956	2.304	151.369	2.304	170.911	NA	NA	NA	NA	2.304	137.386	NA	NA	NA	NA
					38	2.368	292.395	NA	NA	NA	NA	2.368	141.016	NA	NA	NA	NA	NA	NA	2.368	169.438	NA	NA	NA	NA	NA	NA	2.368	187.571	2.368	166.855	2.368	397.835	2.368	225.823	2.368	143.467	NA	NA	NA	NA	NA	NA	2.368	163.179	NA	NA	NA	NA
					39	2.432	265	NA	NA	NA	NA	2.432	142.615	NA	NA	NA	NA	NA	NA	2.432	154.183	NA	NA	NA	NA	NA	NA	2.432	183.314	2.432	150.019	2.432	392.644	2.432	244.074	2.432	126.226	NA	NA	NA	NA	NA	NA	2.432	158.206	NA	NA	NA	NA
					40	2.496	243.72	NA	NA	NA	NA	2.496	144.854	NA	NA	NA	NA	NA	NA	2.496	145.91	NA	NA	NA	NA	NA	NA	2.496	174.877	2.496	134.485	2.496	368.483	2.496	259.29	2.496	121.305	NA	NA	NA	NA	NA	NA	2.496	170.377	NA	NA	NA	NA
					41	2.56	272.16	NA	NA	NA	NA	2.56	157.892	NA	NA	NA	NA	NA	NA	2.56	153.108	NA	NA	NA	NA	NA	NA	2.56	181.993	2.56	145.564	2.56	333.422	2.56	295.894	2.56	137.909	NA	NA	NA	NA	NA	NA	2.56	186.641	NA	NA	NA	NA
					42	2.624	307.92	NA	NA	NA	NA	2.624	159.008	NA	NA	NA	NA	NA	NA	2.624	145.047	NA	NA	NA	NA	NA	NA	2.624	203.625	2.624	155.438	2.624	306.35	2.624	370.519	2.624	160.169	NA	NA	NA	NA	NA	NA	2.624	187.103	NA	NA	NA	NA
					43	2.688	350.12	NA	NA	NA	NA	2.688	159.729	NA	NA	NA	NA	NA	NA	2.688	138.276	NA	NA	NA	NA	NA	NA	2.688	188.385	2.688	150.605	2.688	287.403	2.688	406.377	2.688	170.529	NA	NA	NA	NA	NA	NA	2.688	173.805	NA	NA	NA	NA
					44	2.752	380	NA	NA	NA	NA	2.752	160.213	NA	NA	NA	NA	NA	NA	2.752	130.322	NA	NA	NA	NA	NA	NA	2.752	178.822	2.752	138.854	2.752	240.035	2.752	365.344	2.752	163.493	NA	NA	NA	NA	NA	NA	2.752	149.57	NA	NA	NA	NA
					45	2.816	404.569	NA	NA	NA	NA	2.816	147.849	NA	NA	NA	NA	NA	NA	2.816	137.523	NA	NA	NA	NA	NA	NA	2.816	187.793	2.816	142.463	NA	NA	2.816	308.931	2.816	152.55	NA	NA	NA	NA	NA	NA	2.816	156.509	NA	NA	NA	NA
					46	2.88	390.469	NA	NA	NA	NA	2.88	141.53	NA	NA	NA	NA	NA	NA	2.88	158.517	NA	NA	NA	NA	NA	NA	2.88	192.767	2.88	149.615	NA	NA	2.88	239.67	2.88	149.513	NA	NA	NA	NA	NA	NA	2.88	138.387	NA	NA	NA	NA
					47	2.944	403.187	NA	NA	NA	NA	2.944	142.483	NA	NA	NA	NA	NA	NA	2.944	179.95	NA	NA	NA	NA	NA	NA	2.944	182.203	2.944	155.872	NA	NA	2.944	181.311	2.944	141.278	NA	NA	NA	NA	NA	NA	2.944	124.755	NA	NA	NA	NA
					48	3.008	478.038	NA	NA	NA	NA	3.008	150.477	NA	NA	NA	NA	NA	NA	3.008	165.5	NA	NA	NA	NA	NA	NA	3.008	190.897	NA	NA	NA	NA	3.008	151.275	3.008	151.623	NA	NA	NA	NA	NA	NA	3.008	137.778	NA	NA	NA	NA
					49	3.072	442.538	NA	NA	NA	NA	3.072	155.909	NA	NA	NA	NA	NA	NA	3.072	146.74	NA	NA	NA	NA	NA	NA	3.072	185.664	NA	NA	NA	NA	3.072	178.731	3.072	158.236	NA	NA	NA	NA	NA	NA	3.072	157.766	NA	NA	NA	NA
					50	3.136	378.576	NA	NA	NA	NA	3.136	158.872	NA	NA	NA	NA	NA	NA	3.136	153.14	NA	NA	NA	NA	NA	NA	3.136	166.066	NA	NA	NA	NA	3.136	267.217	3.136	156.581	NA	NA	NA	NA	NA	NA	3.136	165.192	NA	NA	NA	NA
					51	3.2	305.18	NA	NA	NA	NA	3.2	167.693	NA	NA	NA	NA	NA	NA	3.2	149.76	NA	NA	NA	NA	NA	NA	3.2	171.123	NA	NA	NA	NA	3.2	453.372	3.2	156.179	NA	NA	NA	NA	NA	NA	3.2	165.206	NA	NA	NA	NA
					52	3.264	230.997	NA	NA	NA	NA	3.264	164.103	NA	NA	NA	NA	NA	NA	3.264	140.2	NA	NA	NA	NA	NA	NA	3.264	184.362	NA	NA	NA	NA	3.264	658.81	3.264	146.773	NA	NA	NA	NA	NA	NA	3.264	151.382	NA	NA	NA	NA
					53	NA	NA	NA	NA	NA	NA	3.328	146.276	NA	NA	NA	NA	NA	NA	3.328	142.68	NA	NA	NA	NA	NA	NA	3.328	188.753	NA	NA	NA	NA	3.328	767.922	3.328	151.335	NA	NA	NA	NA	NA	NA	3.328	139.914	NA	NA	NA	NA
					54	NA	NA	NA	NA	NA	NA	3.392	151.1	NA	NA	NA	NA	NA	NA	3.392	149.46	NA	NA	NA	NA	NA	NA	3.392	182.029	NA	NA	NA	NA	3.392	777.097	3.392	148.729	NA	NA	NA	NA	NA	NA	3.392	156.199	NA	NA	NA	NA
					55	NA	NA	NA	NA	NA	NA	3.456	165.721	NA	NA	NA	NA	NA	NA	3.456	158.02	NA	NA	NA	NA	NA	NA	3.456	164.12	NA	NA	NA	NA	3.456	681.656	3.456	149.195	NA	NA	NA	NA	NA	NA	3.456	158.014	NA	NA	NA	NA
					56	NA	NA	NA	NA	NA	NA	3.52	156.99	NA	NA	NA	NA	NA	NA	3.52	153.76	NA	NA	NA	NA	NA	NA	NA	NA	NA	NA	NA	NA	3.52	595.045	3.52	162.139	NA	NA	NA	NA	NA	NA	3.52	164.607	NA	NA	NA	NA
					57	NA	NA	NA	NA	NA	NA	3.584	156.897	NA	NA	NA	NA	NA	NA	3.584	156.68	NA	NA	NA	NA	NA	NA	NA	NA	NA	NA	NA	NA	3.584	527.235	NA	NA	NA	NA	NA	NA	NA	NA	3.584	160.863	NA	NA	NA	NA
					58	NA	NA	NA	NA	NA	NA	3.648	152.468	NA	NA	NA	NA	NA	NA	3.648	161.12	NA	NA	NA	NA	NA	NA	NA	NA	NA	NA	NA	NA	3.648	536.932	NA	NA	NA	NA	NA	NA	NA	NA	3.648	137.474	NA	NA	NA	NA
					59	NA	NA	NA	NA	NA	NA	3.712	154.887	NA	NA	NA	NA	NA	NA	3.712	168.24	NA	NA	NA	NA	NA	NA	NA	NA	NA	NA	NA	NA	3.712	578.527	NA	NA	NA	NA	NA	NA	NA	NA	3.712	129.668	NA	NA	NA	NA
					60	NA	NA	NA	NA	NA	NA	3.776	163.396	NA	NA	NA	NA	NA	NA	3.776	177.02	NA	NA	NA	NA	NA	NA	NA	NA	NA	NA	NA	NA	3.776	528.299	NA	NA	NA	NA	NA	NA	NA	NA	3.776	132.45	NA	NA	NA	NA
					61	NA	NA	NA	NA	NA	NA	3.84	162.541	NA	NA	NA	NA	NA	NA	3.84	164.18	NA	NA	NA	NA	NA	NA	NA	NA	NA	NA	NA	NA	NA	NA	NA	NA	NA	NA	NA	NA	NA	NA	3.84	141.383	NA	NA	NA	NA
					62	NA	NA	NA	NA	NA	NA	3.904	149.219	NA	NA	NA	NA	NA	NA	3.904	146.74	NA	NA	NA	NA	NA	NA	NA	NA	NA	NA	NA	NA	NA	NA	NA	NA	NA	NA	NA	NA	NA	NA	3.904	157.381	NA	NA	NA	NA
					63	NA	NA	NA	NA	NA	NA	3.968	146.076	NA	NA	NA	NA	NA	NA	NA	NA	NA	NA	NA	NA	NA	NA	NA	NA	NA	NA	NA	NA	NA	NA	NA	NA	NA	NA	NA	NA	NA	NA	3.968	167.084	NA	NA	NA	NA
					64	NA	NA	NA	NA	NA	NA	4.032	151.825	NA	NA	NA	NA	NA	NA	NA	NA	NA	NA	NA	NA	NA	NA	NA	NA	NA	NA	NA	NA	NA	NA	NA	NA	NA	NA	NA	NA	NA	NA	4.032	154.552	NA	NA	NA	NA
					65	NA	NA	NA	NA	NA	NA	4.096	162.718	NA	NA	NA	NA	NA	NA	NA	NA	NA	NA	NA	NA	NA	NA	NA	NA	NA	NA	NA	NA	NA	NA	NA	NA	NA	NA	NA	NA	NA	NA	4.096	137.806	NA	NA	NA	NA
					66	NA	NA	NA	NA	NA	NA	4.16	165.522	NA	NA	NA	NA	NA	NA	NA	NA	NA	NA	NA	NA	NA	NA	NA	NA	NA	NA	NA	NA	NA	NA	NA	NA	NA	NA	NA	NA	NA	NA	4.16	163.084	NA	NA	NA	NA
					67	NA	NA	NA	NA	NA	NA	4.224	158.152	NA	NA	NA	NA	NA	NA	NA	NA	NA	NA	NA	NA	NA	NA	NA	NA	NA	NA	NA	NA	NA	NA	NA	NA	NA	NA	NA	NA	NA	NA	4.224	159.441	NA	NA	NA	NA
					68	NA	NA	NA	NA	NA	NA	4.288	152.225	NA	NA	NA	NA	NA	NA	NA	NA	NA	NA	NA	NA	NA	NA	NA	NA	NA	NA	NA	NA	NA	NA	NA	NA	NA	NA	NA	NA	NA	NA	4.288	134.696	NA	NA	NA	NA
					69	NA	NA	NA	NA	NA	NA	4.352	140.173	NA	NA	NA	NA	NA	NA	NA	NA	NA	NA	NA	NA	NA	NA	NA	NA	NA	NA	NA	NA	NA	NA	NA	NA	NA	NA	NA	NA	NA	NA	4.352	129.055	NA	NA	NA	NA
					70	NA	NA	NA	NA	NA	NA	4.416	138.555	NA	NA	NA	NA	NA	NA	NA	NA	NA	NA	NA	NA	NA	NA	NA	NA	NA	NA	NA	NA	NA	NA	NA	NA	NA	NA	NA	NA	NA	NA	NA	NA	NA	NA	NA	NA
					71	NA	NA	NA	NA	NA	NA	4.48	146.061	NA	NA	NA	NA	NA	NA	NA	NA	NA	NA	NA	NA	NA	NA	NA	NA	NA	NA	NA	NA	NA	NA	NA	NA	NA	NA	NA	NA	NA	NA	NA	NA	NA	NA	NA	NA
					72	NA	NA	NA	NA	NA	NA	4.544	154.265	NA	NA	NA	NA	NA	NA	NA	NA	NA	NA	NA	NA	NA	NA	NA	NA	NA	NA	NA	NA	NA	NA	NA	NA	NA	NA	NA	NA	NA	NA	NA	NA	NA	NA	NA	NA
					73	NA	NA	NA	NA	NA	NA	4.608	159.524	NA	NA	NA	NA	NA	NA	NA	NA	NA	NA	NA	NA	NA	NA	NA	NA	NA	NA	NA	NA	NA	NA	NA	NA	NA	NA	NA	NA	NA	NA	NA	NA	NA	NA	NA	NA
					74	NA	NA	NA	NA	NA	NA	4.672	177	NA	NA	NA	NA	NA	NA	NA	NA	NA	NA	NA	NA	NA	NA	NA	NA	NA	NA	NA	NA	NA	NA	NA	NA	NA	NA	NA	NA	NA	NA	NA	NA	NA	NA	NA	NA
					75	NA	NA	NA	NA	NA	NA	4.736	152.756	NA	NA	NA	NA	NA	NA	NA	NA	NA	NA	NA	NA	NA	NA	NA	NA	NA	NA	NA	NA	NA	NA	NA	NA	NA	NA	NA	NA	NA	NA	NA	NA	NA	NA	NA	NA
					76	NA	NA	NA	NA	NA	NA	4.8	142.067	NA	NA	NA	NA	NA	NA	NA	NA	NA	NA	NA	NA	NA	NA	NA	NA	NA	NA	NA	NA	NA	NA	NA	NA	NA	NA	NA	NA	NA	NA	NA	NA	NA	NA	NA	NA
					77	NA	NA	NA	NA	NA	NA	4.864	141.917	NA	NA	NA	NA	NA	NA	NA	NA	NA	NA	NA	NA	NA	NA	NA	NA	NA	NA	NA	NA	NA	NA	NA	NA	NA	NA	NA	NA	NA	NA	NA	NA	NA	NA	NA	NA
					78	NA	NA	NA	NA	NA	NA	4.928	145.645	NA	NA	NA	NA	NA	NA	NA	NA	NA	NA	NA	NA	NA	NA	NA	NA	NA	NA	NA	NA	NA	NA	NA	NA	NA	NA	NA	NA	NA	NA	NA	NA	NA	NA	NA	NA
					79	NA	NA	NA	NA	NA	NA	4.992	152.607	NA	NA	NA	NA	NA	NA	NA	NA	NA	NA	NA	NA	NA	NA	NA	NA	NA	NA	NA	NA	NA	NA	NA	NA	NA	NA	NA	NA	NA	NA	NA	NA	NA	NA	NA	NA
					80	NA	NA	NA	NA	NA	NA	5.056	149.888	NA	NA	NA	NA	NA	NA	NA	NA	NA	NA	NA	NA	NA	NA	NA	NA	NA	NA	NA	NA	NA	NA	NA	NA	NA	NA	NA	NA	NA	NA	NA	NA	NA	NA	NA	NA
					81	NA	NA	NA	NA	NA	NA	5.12	147.207	NA	NA	NA	NA	NA	NA	NA	NA	NA	NA	NA	NA	NA	NA	NA	NA	NA	NA	NA	NA	NA	NA	NA	NA	NA	NA	NA	NA	NA	NA	NA	NA	NA	NA	NA	NA
					82	NA	NA	NA	NA	NA	NA	5.184	150.781	NA	NA	NA	NA	NA	NA	NA	NA	NA	NA	NA	NA	NA	NA	NA	NA	NA	NA	NA	NA	NA	NA	NA	NA	NA	NA	NA	NA	NA	NA	NA	NA	NA	NA	NA	NA
					83	NA	NA	NA	NA	NA	NA	NA	NA	NA	NA	NA	NA	NA	NA	NA	NA	NA	NA	NA	NA	NA	NA	NA	NA	NA	NA	NA	NA	NA	NA	NA	NA	NA	NA	NA	NA	NA	NA	NA	NA	NA	NA	NA	NA
					84	NA	NA	NA	NA	NA	NA	NA	NA	NA	NA	NA	NA	NA	NA	NA	NA	NA	NA	NA	NA	NA	NA	NA	NA	NA	NA	NA	NA	NA	NA	NA	NA	NA	NA	NA	NA	NA	NA	NA	NA	NA	NA	NA	NA
					85	NA	NA	NA	NA	NA	NA	NA	NA	NA	NA	NA	NA	NA	NA	NA	NA	NA	NA	NA	NA	NA	NA	NA	NA	NA	NA	NA	NA	NA	NA	NA	NA	NA	NA	NA	NA	NA	NA	NA	NA	NA	NA	NA	NA
					86	NA	NA	NA	NA	NA	NA	NA	NA	NA	NA	NA	NA	NA	NA	NA	NA	NA	NA	NA	NA	NA	NA	NA	NA	NA	NA	NA	NA	NA	NA	NA	NA	NA	NA	NA	NA	NA	NA	NA	NA	NA	NA	NA	NA
					87	NA	NA	NA	NA	NA	NA	NA	NA	NA	NA	NA	NA	NA	NA	NA	NA	NA	NA	NA	NA	NA	NA	NA	NA	NA	NA	NA	NA	NA	NA	NA	NA	NA	NA	NA	NA	NA	NA	NA	NA	NA	NA	NA	NA
					88	NA	NA	NA	NA	NA	NA	NA	NA	NA	NA	NA	NA	NA	NA	NA	NA	NA	NA	NA	NA	NA	NA	NA	NA	NA	NA	NA	NA	NA	NA	NA	NA	NA	NA	NA	NA	NA	NA	NA	NA	NA	NA	NA	NA
					89	NA	NA	NA	NA	NA	NA	NA	NA	NA	NA	NA	NA	NA	NA	NA	NA	NA	NA	NA	NA	NA	NA	NA	NA	NA	NA	NA	NA	NA	NA	NA	NA	NA	NA	NA	NA	NA	NA	NA	NA	NA	NA	NA	NA
					90	NA	NA	NA	NA	NA	NA	NA	NA	NA	NA	NA	NA	NA	NA	NA	NA	NA	NA	NA	NA	NA	NA	NA	NA	NA	NA	NA	NA	NA	NA	NA	NA	NA	NA	NA	NA	NA	NA	NA	NA	NA	NA	NA	NA
					91	NA	NA	NA	NA	NA	NA	NA	NA	NA	NA	NA	NA	NA	NA	NA	NA	NA	NA	NA	NA	NA	NA	NA	NA	NA	NA	NA	NA	NA	NA	NA	NA	NA	NA	NA	NA	NA	NA	NA	NA	NA	NA	NA	NA
[truncated: 404 more columns]

## Sheet: Mlp2
Mlp2-GFP						1								2								3								4								5								6
						Ic				Ir		Ibg		Ic				Ir		Ibg		Ic				Ir		Ibg		Ic				Ir		Ibg		Ic				Ir		Ibg		Ic
							143.538				213.561		128.458		181.935				231.4		131.174		289.603				332.484		120.898		177.414				363.554		126.19		179.474				319.507		120.741		198.688
							15.0801								50.7609								168.705								51.2242								58.7325								68.3319
	average	median	SEM	n		Relative accumulation (RA)					85.1037			Relative accumulation (RA)					100.226			Relative accumulation (RA)					211.586			Relative accumulation (RA)					237.364			Relative accumulation (RA)					198.766			Relative accumulation (RA)
RA:	0.496825	0.424673	0.0478621	31		0.177197								0.506463								0.797335								0.215805								0.295485								0.374666
	p-value
	5.77255e-09
						141105_Mlp2GFP_01_04Crop1_merge.tifGFP_x_lc	141105_Mlp2GFP_01_04Crop1_merge.tifGFP_y_lc	141105_Mlp2GFP_01_04Crop1_merge.tifmCh_x_cap	141105_Mlp2GFP_01_04Crop1_merge.tifmCh_y_cap	141105_Mlp2GFP_01_04Crop1_merge.tifGFP_x_lr	141105_Mlp2GFP_01_04Crop1_merge.tifGFP_y_lr	141105_Mlp2GFP_01_04Crop1_merge.tifGFP_x_bg	141105_Mlp2GFP_01_04Crop1_merge.tifGFP_y_bg	141105_Mlp2GFP_01_05Crop1_merge.tifGFP_x_lc	141105_Mlp2GFP_01_05Crop1_merge.tifGFP_y_lc	141105_Mlp2GFP_01_05Crop1_merge.tifmCh_x_cap	141105_Mlp2GFP_01_05Crop1_merge.tifmCh_y_cap	141105_Mlp2GFP_01_05Crop1_merge.tifGFP_x_lr	141105_Mlp2GFP_01_05Crop1_merge.tifGFP_y_lr	141105_Mlp2GFP_01_05Crop1_merge.tifGFP_x_bg	141105_Mlp2GFP_01_05Crop1_merge.tifGFP_y_bg	141105_Mlp2GFP_01_05Crop2_merge.tifGFP_x_lc	141105_Mlp2GFP_01_05Crop2_merge.tifGFP_y_lc	141105_Mlp2GFP_01_05Crop2_merge.tifmCh_x_cap	141105_Mlp2GFP_01_05Crop2_merge.tifmCh_y_cap	141105_Mlp2GFP_01_05Crop2_merge.tifGFP_x_lr	141105_Mlp2GFP_01_05Crop2_merge.tifGFP_y_lr	141105_Mlp2GFP_01_05Crop2_merge.tifGFP_x_bg	141105_Mlp2GFP_01_05Crop2_merge.tifGFP_y_bg	141105_Mlp2GFP_01_05Crop3_merge.tifGFP_x_lc	141105_Mlp2GFP_01_05Crop3_merge.tifGFP_y_lc	141105_Mlp2GFP_01_05Crop3_merge.tifmCh_x_cap	141105_Mlp2GFP_01_05Crop3_merge.tifmCh_y_cap	141105_Mlp2GFP_01_05Crop3_merge.tifGFP_x_lr	141105_Mlp2GFP_01_05Crop3_merge.tifGFP_y_lr	141105_Mlp2GFP_01_05Crop3_merge.tifGFP_x_bg	141105_Mlp2GFP_01_05Crop3_merge.tifGFP_y_bg	141105_Mlp2GFP_01_05Crop4_merge.tifGFP_x_lc	141105_Mlp2GFP_01_05Crop4_merge.tifGFP_y_lc	141105_Mlp2GFP_01_05Crop4_merge.tifmCh_x_cap	141105_Mlp2GFP_01_05Crop4_merge.tifmCh_y_cap	141105_Mlp2GFP_01_05Crop4_merge.tifGFP_x_lr	141105_Mlp2GFP_01_05Crop4_merge.tifGFP_y_lr	141105_Mlp2GFP_01_05Crop4_merge.tifGFP_x_bg	141105_Mlp2GFP_01_05Crop4_merge.tifGFP_y_bg	141105_Mlp2GFP_01_06Crop1_merge.tifGFP_x_lc	141105_Mlp2GFP_01_06Crop1_merge.tifGFP_y_lc	141105_Mlp2GFP_01_06Crop1_merge.tifmCh_x_cap	141105_Mlp2GFP_01_06Crop1_merge.tifmCh_y_cap
					1	0	178	0	289	0	334	0	134	0	208	0	1469	0	291	0	125	0	292	0	1288	0	566	0	130	0	118	0	113	0	332	0	120	0	308	0	765	0	388	0	125	0	167	0	368
					2	0.04	173.339	0.04	559.514	0.04	337	0.04	128.972	0.04	189	0.04	2033	0.04	272.689	0.04	127.27	0.04	316.909	0.04	1726.12	0.04	510.716	0.04	124.909	0.04	123.385	0.04	165.719	0.04	402.466	0.04	120.675	0.04	333.318	0.04	813.893	0.04	347.949	0.04	125.316	0.04	194	0.04	549.884
					3	0.08	175.2	0.08	897.564	0.08	327	0.08	123.556	0.08	190	0.08	2597	0.08	245.291	0.08	133.337	0.08	300.449	0.08	2065.96	0.08	470.509	0.08	116.217	0.08	137.61	0.08	262.77	0.08	470.58	0.08	124.593	0.08	330.894	0.08	896.075	0.08	324.317	0.08	133.195	0.08	182.267	0.08	760.826
					4	0.12	176.376	0.12	1248.24	0.12	335	0.12	124.954	0.12	200	0.12	2866	0.12	232.886	0.12	136.528	0.12	267.541	0.12	2335.06	0.12	442.537	0.12	115.024	0.12	148.375	0.12	443.717	0.12	451.684	0.12	126.892	0.12	311.014	0.12	1058.26	0.12	325.481	0.12	131.296	0.12	180.524	0.12	972.913
					5	0.16	185.299	0.16	1532.46	0.16	338	0.16	133.688	0.16	214	0.16	2822	0.16	227.777	0.16	135.66	0.16	244.578	0.16	2591.43	0.16	418.347	0.16	121.988	0.16	154.606	0.16	785.622	0.16	378.511	0.16	128.55	0.16	285.097	0.16	1249.97	0.16	319.3	0.16	126.333	0.16	181.23	0.16	1170.06
					6	0.2	188.502	0.2	1678.64	0.2	332	0.2	135.059	0.2	224	0.2	2620	0.2	217.967	0.2	129.496	0.2	225.093	0.2	2806.54	0.2	370.574	0.2	122.962	0.2	168.419	0.2	1214.34	0.2	354.883	0.2	132.55	0.2	254.335	0.2	1405.97	0.2	277.021	0.2	121.121	0.2	184.33	0.2	1398.79
					7	0.24	177.599	0.24	1731.3	0.24	300.766	0.24	127.022	0.24	227.608	0.24	2350.07	0.24	222.426	0.24	123.651	0.24	245.25	0.24	3078.47	0.24	333.81	0.24	121.8	0.24	182.095	0.24	1692.34	0.24	320.756	0.24	138.434	0.24	211.296	0.24	1421.59	0.24	227.453	0.24	114.645	0.24	195.096	0.24	1636.65
					8	0.28	152.64	0.28	1724.29	0.28	279.576	0.28	129.388	0.28	205.202	0.28	2088.29	0.28	243.698	0.28	121.055	0.28	291.91	0.28	3310.68	0.28	362.274	0.28	120.637	0.28	212.86	0.28	2158.56	0.28	272.82	0.28	143.229	0.28	171.253	0.28	1358.15	0.28	198.534	0.28	116.398	0.28	220.05	0.28	1750.04
					9	0.32	142.16	0.32	1672.89	0.32	252.011	0.32	131.562	0.32	171.457	0.32	1794.81	0.32	258.012	0.32	123.594	0.32	346.619	0.32	3308.76	0.32	402.265	0.32	121.236	0.32	230.261	0.32	2306.05	0.32	276.368	0.32	143.2	0.32	154.539	0.32	1350.03	0.32	187.944	0.32	121.491	0.32	262.423	0.32	1778.17
					10	0.36	135.4	0.36	1536	0.36	224.884	0.36	129.678	0.36	154.487	0.36	1560.84	0.36	268.381	0.36	124.557	0.36	382.352	0.36	3048.48	0.36	436.842	0.36	122.795	0.36	227.879	0.36	2252.88	0.36	314.804	0.36	136.087	0.36	138.445	0.36	1382.09	0.36	190.13	0.36	125.803	0.36	277.867	0.36	1749.64
					11	0.4	122.18	0.4	1388.59	0.4	227.577	0.4	128.205	0.4	146.419	0.4	1408.95	0.4	266.978	0.4	126.889	0.4	394.924	0.4	2757.36	0.4	451.848	0.4	122.164	0.4	226.288	0.4	2114.42	0.4	360.666	0.4	125.013	0.4	115.848	0.4	1469.91	0.4	219.447	0.4	131.377	0.4	250.498	0.4	1639.06
					12	0.44	112.08	0.44	1296.68	0.44	252.468	0.44	120.765	0.44	138.067	0.44	1313.34	0.44	256.543	0.44	137.395	0.44	402.513	0.44	2527.92	0.44	471.694	0.44	122.37	0.44	220.441	0.44	1983.21	0.44	389.697	0.44	120.939	0.44	118.527	0.44	1598.93	0.44	268.299	0.44	129.577	0.44	205.318	0.44	1529.96
					13	0.48	114.22	0.48	1231.5	0.48	272.782	0.48	117.011	0.48	138.149	0.48	1259.12	0.48	251.779	0.48	145.826	0.48	389.973	0.48	2455.72	0.48	474.899	0.48	121.23	0.48	199.851	0.48	1957.11	0.48	434.02	0.48	121.878	0.48	123.62	0.48	1693.26	0.48	312.426	0.48	122.764	0.48	173.334	0.48	1456.69
					14	0.52	124.9	0.52	1240.03	0.52	277.263	0.52	121.271	0.52	150.381	0.52	1176.16	0.52	242.108	0.52	137.898	0.52	351.739	0.52	2534.85	0.52	438.42	0.52	120.72	0.52	186.963	0.52	1994.44	0.52	442.763	0.52	116.585	0.52	122.12	0.52	1689.1	0.52	350.215	0.52	113.967	0.52	160.144	0.52	1427.15
					15	0.56	137.14	0.56	1332.31	0.56	263.067	0.56	122.477	0.56	174.816	0.56	1032.49	0.56	245.763	0.56	123.823	0.56	320.653	0.56	2733.01	0.56	395.851	0.56	122.132	0.56	188.757	0.56	1956.46	0.56	443.423	0.56	105.079	0.56	127.437	0.56	1645.35	0.56	390.78	0.56	107.038	0.56	152.312	0.56	1441.21
					16	0.6	141.345	0.6	1391.42	0.6	220.55	0.6	133.647	0.6	189.942	0.6	800.649	0.6	242.522	0.6	111.834	0.6	297.435	0.6	2970.76	0.6	355.284	0.6	130.498	0.6	189.53	0.6	1741.18	0.6	438.419	0.6	100.49	0.6	148.718	0.6	1605.15	0.6	400.143	0.6	112.053	0.6	157.158	0.6	1488.75
					17	0.64	137.393	0.64	1364.57	0.64	179.393	0.64	150.891	0.64	190.569	0.64	523.434	0.64	233.717	0.64	108.137	0.64	271.268	0.64	3192.77	0.64	321.644	0.64	136.697	0.64	180.082	0.64	1435.51	0.64	458.235	0.64	110.81	0.64	151.505	0.64	1601.66	0.64	390.992	0.64	125.752	0.64	177.958	0.64	1547.37
					18	0.68	129.76	0.68	1257.04	0.68	153.53	0.68	168.488	0.68	187.349	0.68	314.315	0.68	232.718	0.68	112.757	0.68	248.087	0.68	3002.1	0.68	326.545	0.68	136.378	0.68	166.092	0.68	1094.09	0.68	529.824	0.68	125.895	0.68	130.451	0.68	1606.97	0.68	400.466	0.68	132.358	0.68	201.801	0.68	1595.81
					19	0.72	127.616	0.72	1138.57	0.72	155.576	0.72	144.566	0.72	180.488	0.72	203.345	0.72	225.802	0.72	117.989	0.72	224.145	0.72	2308.74	0.72	350.467	0.72	135.423	0.72	163.78	0.72	743.378	0.72	598.261	0.72	136.052	0.72	130.217	0.72	1642.64	0.72	400.629	0.72	138.197	0.72	232.964	0.72	1669.11
					20	0.76	131.115	0.76	1000.51	0.76	180.43	0.76	123.636	0.76	176.096	0.76	141.047	0.76	217.349	0.76	118.261	0.76	202.387	0.76	1478.74	0.76	334.081	0.76	131.957	0.76	175.3	0.76	448.844	0.76	587.352	0.76	141.728	0.76	128.173	0.76	1751.96	0.76	365.895	0.76	143.552	0.76	242.196	0.76	1771
					21	0.8	135.831	0.8	792.841	0.8	202.41	0.8	123.728	0.8	172.663	0.8	95.485	0.8	216.695	0.8	118.588	0.8	200.33	NA	NA	0.8	349.956	0.8	123.772	0.8	189.46	NA	NA	0.8	475.849	0.8	139.056	0.8	115.483	0.8	1826	0.8	308.328	0.8	130.751	0.8	236.949	0.8	1868.56
					22	0.84	145.146	0.84	614.914	0.84	196.817	0.84	127.896	0.84	172.607	0.84	65.737	0.84	218.441	0.84	124.051	0.84	211.556	NA	NA	0.84	390.229	0.84	120.425	0.84	200.78	NA	NA	0.84	364.507	0.84	137.054	0.84	110.171	0.84	1836.96	0.84	268.68	0.84	118.752	0.84	229.13	0.84	1847.43
					23	0.88	146.773	NA	NA	0.88	190.792	0.88	129.14	0.88	183.2	0.88	54.135	0.88	225.653	0.88	134.626	0.88	233.152	NA	NA	0.88	406.906	0.88	121.945	0.88	195.92	NA	NA	0.88	287.74	0.88	135.926	0.88	118.463	0.88	1855.55	0.88	271.776	0.88	117.986	0.88	215.17	0.88	1693.28
					24	0.92	136.053	NA	NA	0.92	186.763	0.92	126.683	NA	NA	NA	NA	0.92	232.084	0.92	141.487	NA	NA	NA	NA	0.92	394.058	0.92	119.715	0.92	174.826	NA	NA	0.92	269.55	0.92	135.137	0.92	125.995	0.92	1890.71	0.92	319.369	0.92	125.619	0.92	182.396	0.92	1473.63
					25	0.96	125.644	NA	NA	0.96	182.067	0.96	124.024	NA	NA	NA	NA	0.96	245.5	0.96	138.534	NA	NA	NA	NA	0.96	353.155	0.96	113.024	0.96	159.104	NA	NA	0.96	280.826	0.96	135.673	0.96	127.227	0.96	1906.07	0.96	365.411	0.96	126.41	0.96	159.29	0.96	1283.28
					26	1	121.39	NA	NA	1	170.74	1	122.273	NA	NA	NA	NA	1	253.374	1	133.567	NA	NA	NA	NA	1	282.28	1	108.177	1	137.672	NA	NA	1	261.161	1	131.55	1	131.228	1	1855.06	1	413.59	1	122.817	1	157.471	1	1120.09
					27	1.04	123.913	NA	NA	1.04	168.595	1.04	120.542	NA	NA	NA	NA	1.04	239.799	1.04	133.27	NA	NA	NA	NA	1.04	238.31	1.04	107.76	1.04	131.848	NA	NA	1.04	215.916	1.04	130.11	1.04	145.077	1.04	1635.76	1.04	445.075	1.04	133.628	1.04	170.511	1.04	973.134
					28	1.08	122.043	NA	NA	1.08	157.459	1.08	121.724	NA	NA	NA	NA	1.08	234.922	1.08	133.668	NA	NA	NA	NA	1.08	236.792	1.08	107.773	NA	NA	NA	NA	1.08	173.382	1.08	132.67	1.08	167.269	1.08	1277.35	1.08	444.584	1.08	143.782	1.08	186.566	1.08	802.208
					29	NA	NA	NA	NA	1.12	154.145	1.12	131.513	NA	NA	NA	NA	1.12	262.007	1.12	128.989	NA	NA	NA	NA	1.12	259.112	1.12	107.167	NA	NA	NA	NA	1.12	147.676	1.12	132.11	1.12	197.511	1.12	893.002	1.12	442.544	1.12	140.1	1.12	189.88	NA	NA
					30	NA	NA	NA	NA	1.16	148.788	1.16	141.807	NA	NA	NA	NA	1.16	292.047	1.16	120.185	NA	NA	NA	NA	1.16	265.693	1.16	103.704	NA	NA	NA	NA	1.16	141.471	1.16	123.1	1.16	216.731	NA	NA	1.16	449.208	1.16	139.34	1.16	199.66	NA	NA
					31	NA	NA	NA	NA	1.2	139.398	1.2	137.789	NA	NA	NA	NA	1.2	302.654	1.2	116.495	NA	NA	NA	NA	1.2	251.447	1.2	101.815	NA	NA	NA	NA	1.2	159.23	1.2	113.1	1.2	205.908	NA	NA	1.2	455.222	1.2	136.175	1.2	233.85	NA	NA
					32	NA	NA	NA	NA	1.24	141.347	1.24	122.818	NA	NA	NA	NA	1.24	289.859	1.24	119.887	NA	NA	NA	NA	1.24	222.58	1.24	110.083	NA	NA	NA	NA	1.24	189.013	1.24	106.66	1.24	196.119	NA	NA	1.24	433.88	1.24	132.528	NA	NA	NA	NA
					33	NA	NA	NA	NA	1.28	143.253	1.28	110.695	NA	NA	NA	NA	1.28	276.55	1.28	118.669	NA	NA	NA	NA	1.28	191.06	1.28	117.125	NA	NA	NA	NA	1.28	220.971	1.28	108.67	1.28	193.518	NA	NA	1.28	386.42	1.28	123.336	NA	NA	NA	NA
					34	NA	NA	NA	NA	1.32	141.932	1.32	115.165	NA	NA	NA	NA	1.32	260.92	1.32	115.576	NA	NA	NA	NA	1.32	180.04	1.32	117.139	NA	NA	NA	NA	1.32	258.905	1.32	126.8	1.32	166.657	NA	NA	1.32	356.18	1.32	117.171	NA	NA	NA	NA
					35	NA	NA	NA	NA	1.36	146.245	1.36	120.2	NA	NA	NA	NA	1.36	248.07	1.36	121.494	NA	NA	NA	NA	1.36	191.58	1.36	118.66	NA	NA	NA	NA	1.36	300.367	1.36	136.342	1.36	144.774	NA	NA	1.36	339.65	1.36	118.367	NA	NA	NA	NA
					36	NA	NA	NA	NA	1.4	158.476	1.4	122.354	NA	NA	NA	NA	1.4	240.22	1.4	130.956	NA	NA	NA	NA	1.4	215.98	1.4	116.284	NA	NA	NA	NA	1.4	316.717	1.4	127.337	1.4	150.993	NA	NA	1.4	321.71	1.4	126.211	NA	NA	NA	NA
					37	NA	NA	NA	NA	1.44	165.255	1.44	129.966	NA	NA	NA	NA	1.44	237.37	1.44	135.676	NA	NA	NA	NA	1.44	255.56	1.44	117.306	NA	NA	NA	NA	1.44	338.028	1.44	123.43	1.44	180.248	NA	NA	1.44	305.12	1.44	131.485	NA	NA	NA	NA
					38	NA	NA	NA	NA	1.48	153.659	1.48	138.219	NA	NA	NA	NA	1.48	238.89	1.48	139.336	NA	NA	NA	NA	1.48	266.773	1.48	130.21	NA	NA	NA	NA	1.48	371.792	1.48	119.53	1.48	206.894	NA	NA	1.48	275.48	1.48	125.591	NA	NA	NA	NA
					39	NA	NA	NA	NA	1.52	147.463	1.52	135.383	NA	NA	NA	NA	1.52	231.81	1.52	138.839	NA	NA	NA	NA	1.52	272.544	1.52	139.582	NA	NA	NA	NA	1.52	413.863	1.52	114.852	1.52	227.657	NA	NA	1.52	224.084	1.52	123.39	NA	NA	NA	NA
					40	NA	NA	NA	NA	1.56	153.391	1.56	126.566	NA	NA	NA	NA	1.56	216.92	1.56	128.706	NA	NA	NA	NA	1.56	258.087	1.56	138.118	NA	NA	NA	NA	1.56	471.58	1.56	117.021	1.56	256.213	NA	NA	1.56	183.115	1.56	122.802	NA	NA	NA	NA
					41	NA	NA	NA	NA	1.6	154.862	1.6	124.561	NA	NA	NA	NA	1.6	207.85	1.6	117.055	NA	NA	NA	NA	1.6	237.008	1.6	127.518	NA	NA	NA	NA	1.6	487.3	1.6	127.986	NA	NA	NA	NA	1.6	149.511	1.6	116.911	NA	NA	NA	NA
					42	NA	NA	NA	NA	1.64	155.712	1.64	121.423	NA	NA	NA	NA	1.64	199.786	1.64	125.191	NA	NA	NA	NA	1.64	217.89	1.64	117.07	NA	NA	NA	NA	1.64	420.422	1.64	136.171	NA	NA	NA	NA	1.64	142.75	1.64	112.306	NA	NA	NA	NA
					43	NA	NA	NA	NA	1.68	158.494	1.68	120.372	NA	NA	NA	NA	1.68	196.688	1.68	137.066	NA	NA	NA	NA	1.68	212.88	1.68	111.937	NA	NA	NA	NA	1.68	362.531	1.68	139.125	NA	NA	NA	NA	1.68	151.713	1.68	108.334	NA	NA	NA	NA
					44	NA	NA	NA	NA	1.72	160.287	NA	NA	NA	NA	NA	NA	1.72	199.392	1.72	142.842	NA	NA	NA	NA	1.72	236.267	1.72	114.438	NA	NA	NA	NA	1.72	325.812	1.72	132.378	NA	NA	NA	NA	NA	NA	1.72	107.348	NA	NA	NA	NA
					45	NA	NA	NA	NA	1.76	163.4	NA	NA	NA	NA	NA	NA	1.76	202.085	1.76	141.079	NA	NA	NA	NA	1.76	278.209	1.76	118.822	NA	NA	NA	NA	1.76	362.813	1.76	125.963	NA	NA	NA	NA	NA	NA	1.76	109.843	NA	NA	NA	NA
					46	NA	NA	NA	NA	1.8	172.48	NA	NA	NA	NA	NA	NA	1.8	200.946	1.8	133.933	NA	NA	NA	NA	1.8	322.451	1.8	122.213	NA	NA	NA	NA	1.8	411.05	1.8	128.428	NA	NA	NA	NA	NA	NA	1.8	110.42	NA	NA	NA	NA
					47	NA	NA	NA	NA	1.84	179.4	NA	NA	NA	NA	NA	NA	1.84	204.318	1.84	126.706	NA	NA	NA	NA	1.84	345.797	1.84	137.147	NA	NA	NA	NA	1.84	424.391	1.84	124.995	NA	NA	NA	NA	NA	NA	1.84	100.922	NA	NA	NA	NA
					48	NA	NA	NA	NA	1.88	185.76	NA	NA	NA	NA	NA	NA	1.88	211.038	1.88	125.035	NA	NA	NA	NA	1.88	358.786	1.88	152.839	NA	NA	NA	NA	1.88	382.321	1.88	118.629	NA	NA	NA	NA	NA	NA	1.88	100.243	NA	NA	NA	NA
					49	NA	NA	NA	NA	1.92	197.425	NA	NA	NA	NA	NA	NA	1.92	205.824	1.92	126.188	NA	NA	NA	NA	1.92	360.566	1.92	149.733	NA	NA	NA	NA	1.92	341.15	1.92	120.088	NA	NA	NA	NA	NA	NA	1.92	107.231	NA	NA	NA	NA
					50	NA	NA	NA	NA	1.96	211.486	NA	NA	NA	NA	NA	NA	1.96	191.648	1.96	130.855	NA	NA	NA	NA	1.96	352.589	1.96	133.355	NA	NA	NA	NA	1.96	346.768	1.96	124.465	NA	NA	NA	NA	NA	NA	1.96	109.19	NA	NA	NA	NA
					51	NA	NA	NA	NA	2	227.63	NA	NA	NA	NA	NA	NA	2	184.266	2	139.599	NA	NA	NA	NA	2	317.48	2	118.067	NA	NA	NA	NA	2	369.226	2	126.156	NA	NA	NA	NA	NA	NA	2	108.782	NA	NA	NA	NA
					52	NA	NA	NA	NA	2.04	235.648	NA	NA	NA	NA	NA	NA	2.04	185.969	2.04	148.794	NA	NA	NA	NA	NA	NA	2.04	108.107	NA	NA	NA	NA	2.04	390.336	2.04	134.197	NA	NA	NA	NA	NA	NA	2.04	102.786	NA	NA	NA	NA
					53	NA	NA	NA	NA	2.08	229.599	NA	NA	NA	NA	NA	NA	2.08	191.001	2.08	155.135	NA	NA	NA	NA	NA	NA	2.08	107.175	NA	NA	NA	NA	2.08	405.135	2.08	130.89	NA	NA	NA	NA	NA	NA	2.08	99.176	NA	NA	NA	NA
					54	NA	NA	NA	NA	2.12	237.847	NA	NA	NA	NA	NA	NA	2.12	203.293	2.12	149.094	NA	NA	NA	NA	NA	NA	2.12	105.612	NA	NA	NA	NA	2.12	427.225	2.12	113.879	NA	NA	NA	NA	NA	NA	2.12	105.971	NA	NA	NA	NA
					55	NA	NA	NA	NA	2.16	257.8	NA	NA	NA	NA	NA	NA	2.16	213.38	2.16	141.515	NA	NA	NA	NA	NA	NA	2.16	116.906	NA	NA	NA	NA	2.16	436.558	2.16	111.442	NA	NA	NA	NA	NA	NA	2.16	108.325	NA	NA	NA	NA
					56	NA	NA	NA	NA	2.2	260.2	NA	NA	NA	NA	NA	NA	2.2	228.94	2.2	135.475	NA	NA	NA	NA	NA	NA	2.2	125.047	NA	NA	NA	NA	2.2	456.197	2.2	122.799	NA	NA	NA	NA	NA	NA	2.2	108.409	NA	NA	NA	NA
					57	NA	NA	NA	NA	2.24	243.2	NA	NA	NA	NA	NA	NA	2.24	241.84	2.24	141.02	NA	NA	NA	NA	NA	NA	2.24	121.267	NA	NA	NA	NA	2.24	457.027	2.24	127.141	NA	NA	NA	NA	NA	NA	2.24	112.569	NA	NA	NA	NA
					58	NA	NA	NA	NA	2.28	212.753	NA	NA	NA	NA	NA	NA	2.28	230.88	2.28	147.68	NA	NA	NA	NA	NA	NA	2.28	116.317	NA	NA	NA	NA	2.28	412.666	2.28	129.48	NA	NA	NA	NA	NA	NA	NA	NA	NA	NA	NA	NA
					59	NA	NA	NA	NA	2.32	200.689	NA	NA	NA	NA	NA	NA	2.32	205.86	2.32	149	NA	NA	NA	NA	NA	NA	2.32	123.038	NA	NA	NA	NA	2.32	314.685	NA	NA	NA	NA	NA	NA	NA	NA	NA	NA	NA	NA	NA	NA
					60	NA	NA	NA	NA	2.36	206.518	NA	NA	NA	NA	NA	NA	2.36	178.86	2.36	157.58	NA	NA	NA	NA	NA	NA	2.36	124.602	NA	NA	NA	NA	NA	NA	NA	NA	NA	NA	NA	NA	NA	NA	NA	NA	NA	NA	NA	NA
					61	NA	NA	NA	NA	2.4	229.908	NA	NA	NA	NA	NA	NA	2.4	172.36	2.4	152.98	NA	NA	NA	NA	NA	NA	2.4	122.234	NA	NA	NA	NA	NA	NA	NA	NA	NA	NA	NA	NA	NA	NA	NA	NA	NA	NA	NA	NA
					62	NA	NA	NA	NA	2.44	244.843	NA	NA	NA	NA	NA	NA	NA	NA	2.44	136.96	NA	NA	NA	NA	NA	NA	2.44	122.741	NA	NA	NA	NA	NA	NA	NA	NA	NA	NA	NA	NA	NA	NA	NA	NA	NA	NA	NA	NA
					63	NA	NA	NA	NA	2.48	249.6	NA	NA	NA	NA	NA	NA	NA	NA	2.48	133.78	NA	NA	NA	NA	NA	NA	2.48	120.755	NA	NA	NA	NA	NA	NA	NA	NA	NA	NA	NA	NA	NA	NA	NA	NA	NA	NA	NA	NA
					64	NA	NA	NA	NA	2.52	243.4	NA	NA	NA	NA	NA	NA	NA	NA	2.52	141.02	NA	NA	NA	NA	NA	NA	2.52	117.955	NA	NA	NA	NA	NA	NA	NA	NA	NA	NA	NA	NA	NA	NA	NA	NA	NA	NA	NA	NA
					65	NA	NA	NA	NA	2.56	248.7	NA	NA	NA	NA	NA	NA	NA	NA	2.56	144.56	NA	NA	NA	NA	NA	NA	2.56	130.524	NA	NA	NA	NA	NA	NA	NA	NA	NA	NA	NA	NA	NA	NA	NA	NA	NA	NA	NA	NA
					66	NA	NA	NA	NA	2.6	272.3	NA	NA	NA	NA	NA	NA	NA	NA	2.6	135.64	NA	NA	NA	NA	NA	NA	2.6	137.873	NA	NA	NA	NA	NA	NA	NA	NA	NA	NA	NA	NA	NA	NA	NA	NA	NA	NA	NA	NA
					67	NA	NA	NA	NA	2.64	276.8	NA	NA	NA	NA	NA	NA	NA	NA	2.64	128.32	NA	NA	NA	NA	NA	NA	2.64	144.485	NA	NA	NA	NA	NA	NA	NA	NA	NA	NA	NA	NA	NA	NA	NA	NA	NA	NA	NA	NA
					68	NA	NA	NA	NA	NA	NA	NA	NA	NA	NA	NA	NA	NA	NA	2.68	129.34	NA	NA	NA	NA	NA	NA	2.68	141.174	NA	NA	NA	NA	NA	NA	NA	NA	NA	NA	NA	NA	NA	NA	NA	NA	NA	NA	NA	NA
					69	NA	NA	NA	NA	NA	NA	NA	NA	NA	NA	NA	NA	NA	NA	2.72	127.66	NA	NA	NA	NA	NA	NA	2.72	130.324	NA	NA	NA	NA	NA	NA	NA	NA	NA	NA	NA	NA	NA	NA	NA	NA	NA	NA	NA	NA
					70	NA	NA	NA	NA	NA	NA	NA	NA	NA	NA	NA	NA	NA	NA	2.76	127	NA	NA	NA	NA	NA	NA	2.76	122.41	NA	NA	NA	NA	NA	NA	NA	NA	NA	NA	NA	NA	NA	NA	NA	NA	NA	NA	NA	NA
					71	NA	NA	NA	NA	NA	NA	NA	NA	NA	NA	NA	NA	NA	NA	2.8	124.66	NA	NA	NA	NA	NA	NA	2.8	117.415	NA	NA	NA	NA	NA	NA	NA	NA	NA	NA	NA	NA	NA	NA	NA	NA	NA	NA	NA	NA
					72	NA	NA	NA	NA	NA	NA	NA	NA	NA	NA	NA	NA	NA	NA	2.84	114.64	NA	NA	NA	NA	NA	NA	2.84	114.332	NA	NA	NA	NA	NA	NA	NA	NA	NA	NA	NA	NA	NA	NA	NA	NA	NA	NA	NA	NA
					73	NA	NA	NA	NA	NA	NA	NA	NA	NA	NA	NA	NA	NA	NA	2.88	106.54	NA	NA	NA	NA	NA	NA	2.88	121.57	NA	NA	NA	NA	NA	NA	NA	NA	NA	NA	NA	NA	NA	NA	NA	NA	NA	NA	NA	NA
					74	NA	NA	NA	NA	NA	NA	NA	NA	NA	NA	NA	NA	NA	NA	2.92	114.404	NA	NA	NA	NA	NA	NA	2.92	135.575	NA	NA	NA	NA	NA	NA	NA	NA	NA	NA	NA	NA	NA	NA	NA	NA	NA	NA	NA	NA
					75	NA	NA	NA	NA	NA	NA	NA	NA	NA	NA	NA	NA	NA	NA	2.96	123.459	NA	NA	NA	NA	NA	NA	2.96	136.257	NA	NA	NA	NA	NA	NA	NA	NA	NA	NA	NA	NA	NA	NA	NA	NA	NA	NA	NA	NA
					76	NA	NA	NA	NA	NA	NA	NA	NA	NA	NA	NA	NA	NA	NA	3	125.877	NA	NA	NA	NA	NA	NA	3	135.798	NA	NA	NA	NA	NA	NA	NA	NA	NA	NA	NA	NA	NA	NA	NA	NA	NA	NA	NA	NA
					77	NA	NA	NA	NA	NA	NA	NA	NA	NA	NA	NA	NA	NA	NA	3.04	126.14	NA	NA	NA	NA	NA	NA	3.04	138.823	NA	NA	NA	NA	NA	NA	NA	NA	NA	NA	NA	NA	NA	NA	NA	NA	NA	NA	NA	NA
					78	NA	NA	NA	NA	NA	NA	NA	NA	NA	NA	NA	NA	NA	NA	3.08	127.364	NA	NA	NA	NA	NA	NA	3.08	127.919	NA	NA	NA	NA	NA	NA	NA	NA	NA	NA	NA	NA	NA	NA	NA	NA	NA	NA	NA	NA
					79	NA	NA	NA	NA	NA	NA	NA	NA	NA	NA	NA	NA	NA	NA	3.12	131.924	NA	NA	NA	NA	NA	NA	3.12	107.195	NA	NA	NA	NA	NA	NA	NA	NA	NA	NA	NA	NA	NA	NA	NA	NA	NA	NA	NA	NA
					80	NA	NA	NA	NA	NA	NA	NA	NA	NA	NA	NA	NA	NA	NA	3.16	132.567	NA	NA	NA	NA	NA	NA	3.16	93.057	NA	NA	NA	NA	NA	NA	NA	NA	NA	NA	NA	NA	NA	NA	NA	NA	NA	NA	NA	NA
					81	NA	NA	NA	NA	NA	NA	NA	NA	NA	NA	NA	NA	NA	NA	3.2	143.116	NA	NA	NA	NA	NA	NA	3.2	96.566	NA	NA	NA	NA	NA	NA	NA	NA	NA	NA	NA	NA	NA	NA	NA	NA	NA	NA	NA	NA
					82	NA	NA	NA	NA	NA	NA	NA	NA	NA	NA	NA	NA	NA	NA	3.24	149.161	NA	NA	NA	NA	NA	NA	3.24	107.602	NA	NA	NA	NA	NA	NA	NA	NA	NA	NA	NA	NA	NA	NA	NA	NA	NA	NA	NA	NA
					83	NA	NA	NA	NA	NA	NA	NA	NA	NA	NA	NA	NA	NA	NA	3.28	146.513	NA	NA	NA	NA	NA	NA	3.28	111.416	NA	NA	NA	NA	NA	NA	NA	NA	NA	NA	NA	NA	NA	NA	NA	NA	NA	NA	NA	NA
					84	NA	NA	NA	NA	NA	NA	NA	NA	NA	NA	NA	NA	NA	NA	3.32	142.337	NA	NA	NA	NA	NA	NA	3.32	110.354	NA	NA	NA	NA	NA	NA	NA	NA	NA	NA	NA	NA	NA	NA	NA	NA	NA	NA	NA	NA
					85	NA	NA	NA	NA	NA	NA	NA	NA	NA	NA	NA	NA	NA	NA	3.36	129.795	NA	NA	NA	NA	NA	NA	3.36	122.301	NA	NA	NA	NA	NA	NA	NA	NA	NA	NA	NA	NA	NA	NA	NA	NA	NA	NA	NA	NA
					86	NA	NA	NA	NA	NA	NA	NA	NA	NA	NA	NA	NA	NA	NA	3.4	120.795	NA	NA	NA	NA	NA	NA	3.4	124.047	NA	NA	NA	NA	NA	NA	NA	NA	NA	NA	NA	NA	NA	NA	NA	NA	NA	NA	NA	NA
					87	NA	NA	NA	NA	NA	NA	NA	NA	NA	NA	NA	NA	NA	NA	NA	NA	NA	NA	NA	NA	NA	NA	3.44	115.822	NA	NA	NA	NA	NA	NA	NA	NA	NA	NA	NA	NA	NA	NA	NA	NA	NA	NA	NA	NA
					88	NA	NA	NA	NA	NA	NA	NA	NA	NA	NA	NA	NA	NA	NA	NA	NA	NA	NA	NA	NA	NA	NA	3.48	111.228	NA	NA	NA	NA	NA	NA	NA	NA	NA	NA	NA	NA	NA	NA	NA	NA	NA	NA	NA	NA
					89	NA	NA	NA	NA	NA	NA	NA	NA	NA	NA	NA	NA	NA	NA	NA	NA	NA	NA	NA	NA	NA	NA	3.52	105.441	NA	NA	NA	NA	NA	NA	NA	NA
					90	NA	NA	NA	NA	NA	NA	NA	NA	NA	NA	NA	NA	NA	NA	NA	NA	NA	NA	NA	NA	NA	NA	3.56	98.215	NA	NA	NA	NA	NA	NA	NA	NA
					91	NA	NA	NA	NA	NA	NA	NA	NA	NA	NA	NA	NA	NA	NA	NA	NA	NA	NA	NA	NA	NA	NA	3.6	92.176	NA	NA	NA	NA	NA	NA	NA	NA
[truncated: 204 more columns]

## Sheet: Nup133
Nup133-GFP						1								2								3								4								5								6
						Ic				Ir		Ibg		Ic				Ir		Ibg		Ic				Ir		Ibg		Ic				Ir		Ibg		Ic				Ir		Ibg		Ic
							596.991				304.205		145.545		682.884				335.284		142.425		430.739				303.711		136.786		727.511				378.593		150.928		946.548				645.72		140.341		708.287
							451.446								540.46								293.953								576.583								806.207								580.049
	average	median	SEM	n		Relative accumulation (RA)					158.66			Relative accumulation (RA)					192.86			Relative accumulation (RA)					166.925			Relative accumulation (RA)					227.665			Relative accumulation (RA)					505.379			Relative accumulation (RA)
RA:	2.8017	2.53259	0.304776	15		2.84536								2.80235								1.76098								2.53259								1.59525								3.07724
	p-value
	9.23688e-06
						141105_Nup133_01_05Crop_1.tifGFP_x_lc	141105_Nup133_01_05Crop_1.tifGFP_y_lc	141105_Nup133_01_05Crop_1.tifmCh_x_cap	141105_Nup133_01_05Crop_1.tifmCh_y_cap	141105_Nup133_01_05Crop_1.tifGFP_x_lr	141105_Nup133_01_05Crop_1.tifGFP_y_lr	141105_Nup133_01_05Crop_1.tifGFP_x_bg	141105_Nup133_01_05Crop_1.tifGFP_y_bg	141105_Nup133_01_05Crop_2.tifGFP_x_lc	141105_Nup133_01_05Crop_2.tifGFP_y_lc	141105_Nup133_01_05Crop_2.tifmCh_x_cap	141105_Nup133_01_05Crop_2.tifmCh_y_cap	141105_Nup133_01_05Crop_2.tifGFP_x_lr	141105_Nup133_01_05Crop_2.tifGFP_y_lr	141105_Nup133_01_05Crop_2.tifGFP_x_bg	141105_Nup133_01_05Crop_2.tifGFP_y_bg	141105_Nup133_01_08Crop_1.tifGFP_x_lc	141105_Nup133_01_08Crop_1.tifGFP_y_lc	141105_Nup133_01_08Crop_1.tifmCh_x_cap	141105_Nup133_01_08Crop_1.tifmCh_y_cap	141105_Nup133_01_08Crop_1.tifGFP_x_lr	141105_Nup133_01_08Crop_1.tifGFP_y_lr	141105_Nup133_01_08Crop_1.tifGFP_x_bg	141105_Nup133_01_08Crop_1.tifGFP_y_bg	141105_Nup133_01_09Crop_1.tifGFP_x_lc	141105_Nup133_01_09Crop_1.tifGFP_y_lc	141105_Nup133_01_09Crop_1.tifmCh_x_cap	141105_Nup133_01_09Crop_1.tifmCh_y_cap	141105_Nup133_01_09Crop_1.tifGFP_x_lr	141105_Nup133_01_09Crop_1.tifGFP_y_lr	141105_Nup133_01_09Crop_1.tifGFP_x_bg	141105_Nup133_01_09Crop_1.tifGFP_y_bg	141105_Nup133_01_11Crop_1.tifGFP_x_lc	141105_Nup133_01_11Crop_1.tifGFP_y_lc	141105_Nup133_01_11Crop_1.tifmCh_x_cap	141105_Nup133_01_11Crop_1.tifmCh_y_cap	141105_Nup133_01_11Crop_1.tifGFP_x_lr	141105_Nup133_01_11Crop_1.tifGFP_y_lr	141105_Nup133_01_11Crop_1.tifGFP_x_bg	141105_Nup133_01_11Crop_1.tifGFP_y_bg	141105_Nup133_01_12Crop_1.tifGFP_x_lc	141105_Nup133_01_12Crop_1.tifGFP_y_lc	141105_Nup133_01_12Crop_1.tifmCh_x_cap	141105_Nup133_01_12Crop_1.tifmCh_y_cap
					1	0	314	0	268	0	180	0	132	0	443	0	135	0	521	0	109	0	330	0	0	0	140	0	132	0	909	0	273	0	307	0	130	0	1660	0	3080	0	804	0	153	0	518	0	430
					2	0.04	374.51	0.04	696.303	0.04	162.487	0.04	132.755	0.04	390.402	0.04	336.713	0.04	532.492	0.04	111	0.04	414	0.04	1.575	0.04	151	0.04	137.437	0.04	1008.09	0.04	377.284	0.04	342	0.04	134.444	0.04	1620.63	0.04	3670.95	0.04	823.632	0.04	162.279	0.04	533.086	0.04	690.611
					3	0.08	430.296	0.08	1375.24	0.08	152.195	0.08	120.641	0.08	353.209	0.08	709.529	0.08	497.975	0.08	119	0.08	513	0.08	25.09	0.08	155	0.08	134.799	0.08	1050.37	0.08	481.034	0.08	390	0.08	140.223	0.08	1670.08	0.08	3819.52	0.08	952.918	0.08	149.667	0.08	565.533	0.08	1041.39
					4	0.12	455.808	0.12	2049.68	0.12	148.477	0.12	123.511	0.12	325.096	0.12	1144.6	0.12	434.686	0.12	136	0.12	596	0.12	138.445	0.12	164	0.12	135.277	0.12	1049.78	0.12	571.31	0.12	438	0.12	141.249	0.12	1570.66	0.12	3901.52	0.12	1092.95	0.12	145.156	0.12	564.031	0.12	1454.14
					5	0.16	435.931	0.16	2539.76	0.16	161.522	0.16	140.302	0.16	330.994	0.16	1490.38	0.16	400.624	0.16	144	0.16	664	0.16	464.777	0.16	170	0.16	138.393	0.16	960.366	0.16	631.399	0.16	441	0.16	146.749	0.16	1415.61	0.16	4205.36	0.16	1144.03	0.16	143.498	0.16	550.802	0.16	1706.61
					6	0.2	377.898	0.2	2891.75	0.2	186.207	0.2	158.918	0.2	381.427	0.2	1714.87	0.2	417.718	0.2	129	0.2	664	0.2	1136.49	0.2	182	0.2	143.575	0.2	848.121	0.2	707.229	0.2	430	0.2	144.263	0.2	1205.16	0.2	4415.78	0.2	1135.71	0.2	136.733	0.2	521.844	0.2	1820.43
					7	0.24	314.381	0.24	3227.14	0.24	225.493	0.24	163.146	0.24	448.232	0.24	1924.72	0.24	448.077	0.24	118	0.24	550.84	0.24	2133.91	0.24	192	0.24	134.603	0.24	747.28	0.24	787.143	0.24	409	0.24	130.112	0.24	1133.97	0.24	4535.48	0.24	1040.79	0.24	130.864	0.24	541.731	0.24	1865.33
					8	0.28	295.161	0.28	3668.58	0.28	277.292	0.28	149.217	0.28	531.185	0.28	2206.82	0.28	415.467	0.28	119	0.28	479	0.28	3057.55	0.28	189	0.28	131.65	0.28	634.019	0.28	813.397	0.28	381	0.28	126.623	0.28	1174.98	0.28	4552.03	0.28	845.017	0.28	123.045	0.28	651.47	0.28	1970.38
					9	0.32	374.908	0.32	3871.57	0.32	312.515	0.32	134.768	0.32	632.855	0.32	2423.98	0.32	387.4	0.32	119	0.32	462.04	0.32	3611.58	0.32	196	0.32	131.119	0.32	594.999	0.32	829.117	0.32	337.925	0.32	134.964	0.32	1328.81	0.32	4392.32	0.32	638.267	0.32	113.728	0.32	805.83	0.32	2126.33
					10	0.36	530.535	0.36	3805.55	0.36	317.948	0.36	140.197	0.36	760.47	0.36	2582.58	0.36	350.291	0.36	128	0.36	492.6	0.36	3798.86	0.36	205.369	0.36	133.296	0.36	637.773	0.36	833.527	0.36	287.731	0.36	138.729	0.36	1499.67	0.36	4042.25	0.36	439.243	0.36	113.986	0.36	1001.62	0.36	2291.84
					11	0.4	732.683	0.4	3709.93	0.4	301.716	0.4	155.651	0.4	947.264	0.4	2747.39	0.4	320.807	0.4	140	0.4	517	0.4	3781.44	0.4	234.385	0.4	140.423	0.4	703.474	0.4	851.14	0.4	260.176	0.4	141.703	0.4	1381.52	0.4	3569	0.4	307.975	0.4	127.723	0.4	1193.08	0.4	2379.89
					12	0.44	915.604	0.44	3597.12	0.44	275.231	0.44	164.847	0.44	1135.87	0.44	2972.62	0.44	281.461	0.44	142	0.44	531.829	0.44	3697.19	0.44	284.404	0.44	142.915	0.44	766.188	0.44	921.156	0.44	250.062	0.44	141.364	0.44	1192.24	0.44	2948.4	0.44	259.831	0.44	138.74	0.44	1279.35	0.44	2414.68
					13	0.48	970.926	0.48	3464	0.48	242.245	0.48	155.179	0.48	1285.23	0.48	3264.84	0.48	266.571	0.48	134	0.48	518.164	0.48	3609.62	0.48	347.879	0.48	138.773	0.48	784.219	0.48	1010.38	0.48	255.823	0.48	143.009	0.48	1077.57	0.48	2080.4	0.48	280.878	0.48	129.298	0.48	1268.71	0.48	2327.34
					14	0.52	935.737	0.52	3441.81	0.52	240.294	0.52	149.248	0.52	1334.52	0.52	3379.04	0.52	250.705	0.52	130	0.52	472.227	0.52	3625.34	0.52	423.597	0.52	131.171	0.52	819.235	0.52	1046.69	0.52	282.287	0.52	146.757	0.52	901.513	0.52	1205.12	0.52	324.347	0.52	115.317	0.52	1300.28	0.52	1975.97
					15	0.56	977.54	0.56	3674.03	0.56	276.072	0.56	159.6	0.56	1164.17	0.56	3257.86	0.56	246.979	0.56	138	0.56	439.606	0.56	3722.96	0.56	461.611	0.56	128.806	0.56	872.028	0.56	1014.74	0.56	326.056	0.56	141.936	0.56	751.114	0.56	559.96	0.56	364.501	0.56	107.275	0.56	1122.74	0.56	1502.07
					16	0.6	1067.4	0.6	4120.51	0.6	321.428	0.6	165.06	0.6	1010.54	0.6	3134.92	0.6	250.058	0.6	139	0.6	438.026	0.6	3742.73	0.6	457.328	0.6	142.15	0.6	849.521	0.6	972.439	0.6	351.462	0.6	135.496	0.6	649.689	0.6	201.48	0.6	414.459	0.6	106.297	0.6	900.829	0.6	1084.04
					17	0.64	1052.92	0.64	4578.58	0.64	386.474	0.64	143.853	0.64	904.321	0.64	3118.07	0.64	246.417	0.64	146	0.64	463.618	0.64	3628.33	0.64	451.798	0.64	145.006	0.64	877.12	0.64	946.922	0.64	329.364	0.64	136.049	0.64	640.226	NA	NA	0.64	475.6	0.64	106.992	0.64	691.711	NA	NA
					18	0.68	989.9	0.68	4779.4	0.68	427.141	0.68	118.41	0.68	880.458	0.68	3174.36	0.68	240.879	0.68	156	0.68	488.654	0.68	3473.97	0.68	454.237	0.68	137.181	0.68	888.19	0.68	905.1	0.68	332.7	0.68	135.425	0.68	718.83	NA	NA	0.68	539.619	0.68	116.297	0.68	585.5	NA	NA
					19	0.72	931.02	0.72	4480.7	0.72	402.45	0.72	113.826	0.72	928.352	0.72	3364.63	0.72	230.597	0.72	160	0.72	491.526	0.72	3238.27	0.72	498.521	0.72	138.113	0.72	890.82	0.72	814.43	0.72	387.52	0.72	130.656	0.72	841.736	NA	NA	0.72	572.677	0.72	133.032	0.72	580.35	NA	NA
					20	0.76	887.716	0.76	3478.03	0.76	367.651	0.76	131.709	0.76	897.383	0.76	3594.18	0.76	223.587	0.76	162	0.76	444.434	0.76	3002.24	0.76	546.089	0.76	138.719	0.76	861.88	0.76	715.698	0.76	429.54	0.76	132.517	0.76	966.923	NA	NA	0.76	499.291	0.76	153.062	0.76	579.2	NA	NA
					21	0.8	859.8	0.8	2129.78	0.8	339.472	0.8	139.121	0.8	762.564	0.8	3508.62	0.8	215.3	0.8	157	0.8	424.612	0.8	2892.59	0.8	571.879	0.8	132.972	0.8	786.2	0.8	698.603	0.8	439.52	0.8	145.715	0.8	1036.34	NA	NA	0.8	446.362	0.8	171.241	0.8	556.8	NA	NA
					22	0.84	827.384	0.84	1170.07	0.84	307.965	0.84	139.12	0.84	671.71	0.84	3047.73	0.84	242.15	0.84	147	0.84	416.793	0.84	2767.99	0.84	562.431	0.84	133.173	0.84	688.91	0.84	763.86	0.84	423.08	0.84	152.871	0.84	1030.13	NA	NA	0.84	533.862	0.84	172.027	0.84	523.6	NA	NA
					23	0.88	758.506	0.88	977.86	0.88	291.308	0.88	136.93	0.88	607.079	0.88	2429.76	0.88	285.25	0.88	146.414	0.88	397.881	0.88	2487.06	0.88	563.669	0.88	140.974	0.88	592.64	0.88	810.97	0.88	370.3	0.88	142.53	0.88	1271.28	NA	NA	0.88	717.896	0.88	165.215	0.88	485.148	NA	NA
					24	0.92	640.164	NA	NA	0.92	290.466	0.92	129.189	0.92	587.825	0.92	1996.54	0.92	330.95	0.92	141.017	0.92	417.099	0.92	1965.17	0.92	515.251	0.92	141.781	0.92	549.466	0.92	746.15	0.92	300.335	0.92	131.836	0.92	1405.83	NA	NA	0.92	901.585	0.92	159.129	0.92	468.462	NA	NA
					25	0.96	477.91	NA	NA	0.96	279.114	0.96	111.526	0.96	589.083	0.96	1472.67	0.96	389.25	0.96	142.728	0.96	431.214	0.96	1183.57	0.96	467.652	0.96	134.413	0.96	589.511	0.96	586.411	0.96	253.356	0.96	130.178	0.96	1161.02	NA	NA	0.96	986.972	0.96	133.643	0.96	466.564	NA	NA
					26	1	317.95	NA	NA	1	272.175	1	103.864	1	587.615	1	901.129	1	431.45	1	139.971	1	383.526	1	513.241	1	394.91	1	138.101	1	637.979	1	409.758	1	217.297	1	136.587	1	787.062	NA	NA	1	943.702	1	114.496	1	453.373	NA	NA
					27	1.04	211.742	NA	NA	1.04	251.723	1.04	108.924	1.04	562.732	1.04	463.002	1.04	420.934	1.04	136.15	1.04	343.58	NA	NA	1.04	311.253	1.04	141.327	1.04	594.02	1.04	256.832	1.04	191.898	1.04	149.002	1.04	448.338	NA	NA	1.04	825.327	1.04	123.513	1.04	414.114	NA	NA
					28	1.08	171.756	NA	NA	1.08	233.324	1.08	114.2	1.08	509.166	NA	NA	1.08	416.683	1.08	137.022	1.08	341.672	NA	NA	1.08	265.28	1.08	142.946	1.08	512.226	1.08	145.022	1.08	168.289	1.08	150.435	1.08	307.45	NA	NA	1.08	685.015	1.08	144.534	NA	NA	NA	NA
					29	1.12	150.768	NA	NA	1.12	230.071	1.12	122.963	1.12	525.289	NA	NA	1.12	433.792	1.12	143.359	1.12	377.994	NA	NA	1.12	254.084	1.12	147.13	1.12	426.33	1.12	87.286	1.12	156.666	1.12	139.318	1.12	326.721	NA	NA	1.12	610.658	1.12	154.653	NA	NA	NA	NA
					30	1.16	128.877	NA	NA	1.16	242.015	1.16	127.856	1.16	520.421	NA	NA	1.16	394.38	1.16	142.461	1.16	434.624	NA	NA	1.16	245.92	1.16	148.449	1.16	472.426	1.16	65.184	1.16	170.637	1.16	136.481	1.16	389.043	NA	NA	1.16	669.756	1.16	154.002	NA	NA	NA	NA
					31	NA	NA	NA	NA	1.2	270.255	1.2	121.021	1.2	450.654	NA	NA	1.2	350.619	1.2	135.581	1.2	462.71	NA	NA	1.2	234.472	1.2	138.457	1.2	514.248	NA	NA	1.2	201.95	1.2	146.262	1.2	460.827	NA	NA	1.2	825.29	1.2	150.391	NA	NA	NA	NA
					32	NA	NA	NA	NA	1.24	334.612	1.24	120.151	1.24	393.186	NA	NA	1.24	312.028	1.24	124.812	1.24	450.469	NA	NA	1.24	236.111	1.24	133.418	1.24	499.874	NA	NA	1.24	236.21	1.24	161.591	1.24	524.909	NA	NA	1.24	923.023	1.24	152.94	NA	NA	NA	NA
					33	NA	NA	NA	NA	1.28	449.257	1.28	134.124	NA	NA	NA	NA	1.28	280.314	1.28	125.693	1.28	403.559	NA	NA	1.28	250.834	1.28	133.955	1.28	466.436	NA	NA	1.28	270.69	1.28	171.539	1.28	557.23	NA	NA	1.28	836.24	1.28	157.3	NA	NA	NA	NA
					34	NA	NA	NA	NA	1.32	602.559	1.32	139.468	NA	NA	NA	NA	1.32	260.379	1.32	134.543	1.32	368.5	NA	NA	1.32	289.351	1.32	133.427	1.32	442.33	NA	NA	1.32	306.95	1.32	158.91	1.32	596.67	NA	NA	1.32	641.36	1.32	171.01	NA	NA	NA	NA
					35	NA	NA	NA	NA	1.36	796.744	1.36	146.037	NA	NA	NA	NA	1.36	266.78	1.36	139.927	1.36	366.25	NA	NA	1.36	300.229	1.36	129.138	1.36	423.612	NA	NA	1.36	344.54	1.36	140.18	1.36	549.95	NA	NA	1.36	520.16	1.36	172.64	NA	NA	NA	NA
					36	NA	NA	NA	NA	1.4	969.032	1.4	167.043	NA	NA	NA	NA	1.4	279.799	1.4	134.075	1.4	339.5	NA	NA	1.4	302.507	1.4	126.338	1.4	436.427	NA	NA	1.4	393.2	1.4	134.794	1.4	411.97	NA	NA	1.4	448.6	1.4	162.76	NA	NA	NA	NA
					37	NA	NA	NA	NA	1.44	1047.95	1.44	180.513	NA	NA	NA	NA	1.44	287.588	1.44	137.614	1.44	314.4	NA	NA	1.44	300.041	1.44	128.969	1.44	513.482	NA	NA	1.44	438.628	1.44	146.63	1.44	356.58	NA	NA	1.44	407.32	1.44	159	NA	NA	NA	NA
					38	NA	NA	NA	NA	1.48	1004.71	1.48	170.092	NA	NA	NA	NA	1.48	279.287	1.48	142.105	1.48	301.55	NA	NA	1.48	287.064	1.48	126.877	1.48	613.349	NA	NA	1.48	432.472	1.48	158.791	NA	NA	NA	NA	1.48	412.889	1.48	152.64	NA	NA	NA	NA
					39	NA	NA	NA	NA	1.52	859.454	1.52	148.1	NA	NA	NA	NA	1.52	275.221	1.52	139.605	1.52	294.733	NA	NA	1.52	272.659	1.52	124.631	1.52	695.632	NA	NA	1.52	396.844	1.52	161.748	NA	NA	NA	NA	1.52	454.492	1.52	152.3	NA	NA	NA	NA
					40	NA	NA	NA	NA	1.56	680.601	1.56	146.772	NA	NA	NA	NA	1.56	265.454	1.56	136.186	1.56	301.461	NA	NA	1.56	249.791	1.56	122.977	1.56	728.402	NA	NA	1.56	398.431	1.56	164.88	NA	NA	NA	NA	1.56	502.239	1.56	168.13	NA	NA	NA	NA
					41	NA	NA	NA	NA	1.6	539.077	1.6	152.684	NA	NA	NA	NA	1.6	242.248	1.6	139.141	1.6	333.61	NA	NA	1.6	212.147	1.6	114.66	1.6	756.641	NA	NA	1.6	425.98	1.6	170.719	NA	NA	NA	NA	1.6	531.093	1.6	170.964	NA	NA	NA	NA
					42	NA	NA	NA	NA	1.64	460.145	1.64	150.666	NA	NA	NA	NA	1.64	215.183	1.64	146.961	1.64	370.64	NA	NA	1.64	194.782	1.64	114.676	1.64	802.58	NA	NA	1.64	427.536	1.64	171	NA	NA	NA	NA	1.64	559.12	1.64	150.158	NA	NA	NA	NA
					43	NA	NA	NA	NA	1.68	410.651	1.68	138.312	NA	NA	NA	NA	1.68	198.647	1.68	156.243	1.68	366.293	NA	NA	1.68	196.75	1.68	127.263	1.68	847.867	NA	NA	1.68	429.276	1.68	170.491	NA	NA	NA	NA	1.68	558.019	1.68	135.966	NA	NA	NA	NA
					44	NA	NA	NA	NA	1.72	363.685	1.72	125.621	NA	NA	NA	NA	1.72	203.856	1.72	164.435	1.72	339.261	NA	NA	1.72	205.6	1.72	145.835	1.72	879.604	NA	NA	1.72	430.375	1.72	163.138	NA	NA	NA	NA	1.72	588.326	1.72	135.29	NA	NA	NA	NA
					45	NA	NA	NA	NA	1.76	324.639	1.76	115.675	NA	NA	NA	NA	1.76	223.927	1.76	165.756	NA	NA	NA	NA	1.76	225.1	1.76	142.888	1.76	915.021	NA	NA	1.76	413.71	1.76	154.069	NA	NA	NA	NA	1.76	659.956	1.76	139.584	NA	NA	NA	NA
					46	NA	NA	NA	NA	1.8	299.334	1.8	112.069	NA	NA	NA	NA	1.8	246.335	1.8	161.28	NA	NA	NA	NA	1.8	250.05	1.8	134.094	1.8	974.242	NA	NA	1.8	436.99	1.8	142.782	NA	NA	NA	NA	1.8	792.521	1.8	149.335	NA	NA	NA	NA
					47	NA	NA	NA	NA	1.84	296.555	1.84	125.14	NA	NA	NA	NA	1.84	289.377	1.84	152.133	NA	NA	NA	NA	1.84	261.15	1.84	137.726	1.84	1076.04	NA	NA	1.84	538.254	1.84	140.136	NA	NA	NA	NA	1.84	931.746	1.84	150.518	NA	NA	NA	NA
					48	NA	NA	NA	NA	1.88	300.099	1.88	145.391	NA	NA	NA	NA	1.88	346.912	1.88	147.868	NA	NA	NA	NA	1.88	252.95	1.88	150.803	1.88	1046.44	NA	NA	1.88	593.003	1.88	149.342	NA	NA	NA	NA	1.88	971.955	1.88	140.646	NA	NA	NA	NA
					49	NA	NA	NA	NA	1.92	304.764	1.92	157.355	NA	NA	NA	NA	1.92	392.096	1.92	146.122	NA	NA	NA	NA	NA	NA	1.92	167.411	1.92	893.756	NA	NA	1.92	624.93	1.92	161.403	NA	NA	NA	NA	1.92	978.598	1.92	135.77	NA	NA	NA	NA
					50	NA	NA	NA	NA	1.96	278.995	1.96	167.607	NA	NA	NA	NA	1.96	405.35	1.96	148.081	NA	NA	NA	NA	NA	NA	1.96	168.319	1.96	725.315	NA	NA	1.96	612.365	1.96	162.904	NA	NA	NA	NA	1.96	909.125	1.96	136.424	NA	NA	NA	NA
					51	NA	NA	NA	NA	2	245.851	2	180.893	NA	NA	NA	NA	2	389.76	2	145.51	NA	NA	NA	NA	NA	NA	2	147.76	2	569.997	NA	NA	2	602.75	2	171.206	NA	NA	NA	NA	2	767.702	2	134.802	NA	NA	NA	NA
					52	NA	NA	NA	NA	2.04	214.195	2.04	196.004	NA	NA	NA	NA	2.04	411.432	2.04	136.215	NA	NA	NA	NA	NA	NA	2.04	146.958	2.04	407.102	NA	NA	2.04	592.214	2.04	172.772	NA	NA	NA	NA	2.04	623.564	2.04	130.836	NA	NA	NA	NA
					53	NA	NA	NA	NA	2.08	208.822	2.08	185.086	NA	NA	NA	NA	2.08	428.996	2.08	134.162	NA	NA	NA	NA	NA	NA	2.08	145.168	NA	NA	NA	NA	2.08	545.854	2.08	169.658	NA	NA	NA	NA	2.08	508.711	2.08	123.404	NA	NA	NA	NA
					54	NA	NA	NA	NA	2.12	196.925	2.12	170.103	NA	NA	NA	NA	2.12	428.125	2.12	135.764	NA	NA	NA	NA	NA	NA	2.12	125.488	NA	NA	NA	NA	2.12	507.862	2.12	165.52	NA	NA	NA	NA	2.12	467	2.12	115.713	NA	NA	NA	NA
					55	NA	NA	NA	NA	2.16	187.074	2.16	173.558	NA	NA	NA	NA	2.16	408.498	2.16	140.35	NA	NA	NA	NA	NA	NA	2.16	115.113	NA	NA	NA	NA	2.16	452.387	2.16	169.559	NA	NA	NA	NA	2.16	472	2.16	113.799	NA	NA	NA	NA
					56	NA	NA	NA	NA	2.2	193.992	2.2	152.84	NA	NA	NA	NA	2.2	404.678	2.2	160.395	NA	NA	NA	NA	NA	NA	2.2	127.274	NA	NA	NA	NA	2.2	392.216	2.2	176.256	NA	NA	NA	NA	2.2	469	2.2	117.967	NA	NA	NA	NA
					57	NA	NA	NA	NA	2.24	194.683	2.24	148.06	NA	NA	NA	NA	2.24	394.95	2.24	179.909	NA	NA	NA	NA	NA	NA	2.24	139.878	NA	NA	NA	NA	2.24	369.628	2.24	179.118	NA	NA	NA	NA	2.24	517	2.24	120.702	NA	NA	NA	NA
					58	NA	NA	NA	NA	2.28	182.187	2.28	151.413	NA	NA	NA	NA	2.28	385.709	2.28	173.98	NA	NA	NA	NA	NA	NA	2.28	148.887	NA	NA	NA	NA	2.28	361.629	2.28	166.12	NA	NA	NA	NA	2.28	560	NA	NA	NA	NA	NA	NA
					59	NA	NA	NA	NA	2.32	190.714	2.32	159.503	NA	NA	NA	NA	2.32	369.482	2.32	160.989	NA	NA	NA	NA	NA	NA	2.32	149.088	NA	NA	NA	NA	2.32	368.141	2.32	151.68	NA	NA	NA	NA	2.32	511	NA	NA	NA	NA	NA	NA
					60	NA	NA	NA	NA	2.36	219.925	2.36	162.393	NA	NA	NA	NA	2.36	350.09	2.36	157.865	NA	NA	NA	NA	NA	NA	2.36	143.849	NA	NA	NA	NA	2.36	396.714	2.36	151.24	NA	NA	NA	NA	2.36	413	NA	NA	NA	NA	NA	NA
					61	NA	NA	NA	NA	2.4	245.361	2.4	171.532	NA	NA	NA	NA	NA	NA	2.4	153.24	NA	NA	NA	NA	NA	NA	2.4	139.928	NA	NA	NA	NA	2.4	425.993	2.4	152.92	NA	NA	NA	NA	2.4	351	NA	NA	NA	NA	NA	NA
					62	NA	NA	NA	NA	2.44	218.188	2.44	191.544	NA	NA	NA	NA	NA	NA	2.44	148.19	NA	NA	NA	NA	NA	NA	2.44	138.3	NA	NA	NA	NA	2.44	445.018	2.44	149.3	NA	NA	NA	NA	NA	NA	NA	NA	NA	NA	NA	NA
					63	NA	NA	NA	NA	2.48	206.7	2.48	184.485	NA	NA	NA	NA	NA	NA	2.48	148.351	NA	NA	NA	NA	NA	NA	2.48	134.127	NA	NA	NA	NA	NA	NA	2.48	148.08	NA	NA	NA	NA	NA	NA	NA	NA	NA	NA	NA	NA
					64	NA	NA	NA	NA	2.52	216.1	2.52	167.895	NA	NA	NA	NA	NA	NA	2.52	148.37	NA	NA	NA	NA	NA	NA	2.52	129.357	NA	NA	NA	NA	NA	NA	2.52	150.08	NA	NA	NA	NA	NA	NA	NA	NA	NA	NA	NA	NA
					65	NA	NA	NA	NA	2.56	215.1	2.56	157.074	NA	NA	NA	NA	NA	NA	2.56	140.472	NA	NA	NA	NA	NA	NA	2.56	126.469	NA	NA	NA	NA	NA	NA	2.56	157.48	NA	NA	NA	NA	NA	NA	NA	NA	NA	NA	NA	NA
					66	NA	NA	NA	NA	2.6	209.5	2.6	145.566	NA	NA	NA	NA	NA	NA	2.6	136.208	NA	NA	NA	NA	NA	NA	2.6	124.239	NA	NA	NA	NA	NA	NA	2.6	169.48	NA	NA	NA	NA	NA	NA	NA	NA	NA	NA	NA	NA
					67	NA	NA	NA	NA	2.64	194	2.64	139.225	NA	NA	NA	NA	NA	NA	2.64	151.643	NA	NA	NA	NA	NA	NA	2.64	129.108	NA	NA	NA	NA	NA	NA	2.64	163.12	NA	NA	NA	NA	NA	NA	NA	NA	NA	NA	NA	NA
					68	NA	NA	NA	NA	2.68	176.1	2.68	139.876	NA	NA	NA	NA	NA	NA	2.68	161.317	NA	NA	NA	NA	NA	NA	2.68	132.202	NA	NA	NA	NA	NA	NA	2.68	145.98	NA	NA	NA	NA	NA	NA	NA	NA	NA	NA	NA	NA
					69	NA	NA	NA	NA	2.72	186.4	2.72	133.475	NA	NA	NA	NA	NA	NA	2.72	143.714	NA	NA	NA	NA	NA	NA	2.72	134.969	NA	NA	NA	NA	NA	NA	2.72	143.78	NA	NA	NA	NA	NA	NA	NA	NA	NA	NA	NA	NA
					70	NA	NA	NA	NA	2.76	212.107	2.76	130.899	NA	NA	NA	NA	NA	NA	2.76	127.583	NA	NA	NA	NA	NA	NA	2.76	145.423	NA	NA	NA	NA	NA	NA	2.76	147	NA	NA	NA	NA	NA	NA	NA	NA	NA	NA	NA	NA
					71	NA	NA	NA	NA	2.8	220	2.8	141.87	NA	NA	NA	NA	NA	NA	2.8	130.914	NA	NA	NA	NA	NA	NA	2.8	149.686	NA	NA	NA	NA	NA	NA	2.8	152.097	NA	NA	NA	NA	NA	NA	NA	NA	NA	NA	NA	NA
					72	NA	NA	NA	NA	2.84	215.794	NA	NA	NA	NA	NA	NA	NA	NA	2.84	141.317	NA	NA	NA	NA	NA	NA	NA	NA	NA	NA	NA	NA	NA	NA	2.84	160.637	NA	NA	NA	NA	NA	NA	NA	NA	NA	NA	NA	NA
					73	NA	NA	NA	NA	2.88	202.91	NA	NA	NA	NA	NA	NA	NA	NA	2.88	150.259	NA	NA	NA	NA	NA	NA	NA	NA	NA	NA	NA	NA	NA	NA	2.88	170.835	NA	NA	NA	NA	NA	NA	NA	NA	NA	NA	NA	NA
					74	NA	NA	NA	NA	2.92	184.305	NA	NA	NA	NA	NA	NA	NA	NA	NA	NA	NA	NA	NA	NA	NA	NA	NA	NA	NA	NA	NA	NA	NA	NA	2.92	170.688	NA	NA	NA	NA	NA	NA	NA	NA	NA	NA	NA	NA
					75	NA	NA	NA	NA	2.96	168.234	NA	NA	NA	NA	NA	NA	NA	NA	NA	NA	NA	NA	NA	NA	NA	NA	NA	NA	NA	NA	NA	NA	NA	NA	2.96	158.42	NA	NA	NA	NA	NA	NA	NA	NA	NA	NA	NA	NA
					76	NA	NA	NA	NA	3	155.838	NA	NA	NA	NA	NA	NA	NA	NA	NA	NA	NA	NA	NA	NA	NA	NA	NA	NA	NA	NA	NA	NA	NA	NA	3	148.861	NA	NA	NA	NA	NA	NA	NA	NA	NA	NA	NA	NA
					77	NA	NA	NA	NA	3.04	149.522	NA	NA	NA	NA	NA	NA	NA	NA	NA	NA	NA	NA	NA	NA	NA	NA	NA	NA	NA	NA	NA	NA	NA	NA	3.04	153.414	NA	NA	NA	NA	NA	NA	NA	NA	NA	NA	NA	NA
					78	NA	NA	NA	NA	3.08	138.745	NA	NA	NA	NA	NA	NA	NA	NA	NA	NA	NA	NA	NA	NA	NA	NA	NA	NA	NA	NA	NA	NA	NA	NA	3.08	163.938	NA	NA	NA	NA	NA	NA	NA	NA	NA	NA	NA	NA
					79	NA	NA	NA	NA	3.12	127.67	NA	NA	NA	NA	NA	NA	NA	NA	NA	NA	NA	NA	NA	NA	NA	NA	NA	NA	NA	NA	NA	NA	NA	NA	3.12	167.304	NA	NA	NA	NA	NA	NA	NA	NA	NA	NA	NA	NA
					80	NA	NA	NA	NA	3.16	127.676	NA	NA	NA	NA	NA	NA	NA	NA	NA	NA	NA	NA	NA	NA	NA	NA	NA	NA	NA	NA	NA	NA	NA	NA	3.16	164.417	NA	NA	NA	NA	NA	NA	NA	NA	NA	NA	NA	NA
					81	NA	NA	NA	NA	3.2	140.39	NA	NA	NA	NA	NA	NA	NA	NA	NA	NA	NA	NA	NA	NA	NA	NA	NA	NA	NA	NA	NA	NA	NA	NA	3.2	154.265	NA	NA	NA	NA	NA	NA	NA	NA	NA	NA	NA	NA
					82	NA	NA	NA	NA	NA	NA	NA	NA	NA	NA	NA	NA	NA	NA	NA	NA	NA	NA	NA	NA	NA	NA	NA	NA	NA	NA	NA	NA	NA	NA	3.24	147.286	NA	NA	NA	NA	NA	NA	NA	NA	NA	NA	NA	NA
					83	NA	NA	NA	NA	NA	NA	NA	NA	NA	NA	NA	NA	NA	NA	NA	NA	NA	NA	NA	NA	NA	NA	NA	NA	NA	NA	NA	NA	NA	NA	3.28	148.84	NA	NA	NA	NA	NA	NA	NA	NA	NA	NA	NA	NA
					84	NA	NA	NA	NA	NA	NA	NA	NA	NA	NA	NA	NA	NA	NA	NA	NA	NA	NA	NA	NA	NA	NA	NA	NA	NA	NA	NA	NA	NA	NA	3.32	147.446	NA	NA	NA	NA	NA	NA	NA	NA	NA	NA	NA	NA
					85	NA	NA	NA	NA	NA	NA	NA	NA	NA	NA	NA	NA	NA	NA	NA	NA	NA	NA	NA	NA	NA	NA	NA	NA	NA	NA	NA	NA	NA	NA	3.36	139.856	NA	NA	NA	NA	NA	NA	NA	NA	NA	NA	NA	NA
					86	NA	NA	NA	NA	NA	NA	NA	NA	NA	NA	NA	NA	NA	NA	NA	NA	NA	NA	NA	NA	NA	NA	NA	NA	NA	NA	NA	NA	NA	NA	3.4	132.617	NA	NA	NA	NA	NA	NA	NA	NA	NA	NA	NA	NA
					87	NA	NA	NA	NA	NA	NA	NA	NA	NA	NA	NA	NA	NA	NA	NA	NA	NA	NA	NA	NA	NA	NA	NA	NA	NA	NA	NA	NA	NA	NA	NA	NA	NA	NA	NA	NA	NA	NA	NA	NA	NA	NA	NA	NA
					88	NA	NA	NA	NA	NA	NA	NA	NA	NA	NA	NA	NA	NA	NA	NA	NA	NA	NA	NA	NA	NA	NA	NA	NA	NA	NA	NA	NA	NA	NA	NA	NA	NA	NA	NA	NA	NA	NA	NA	NA	NA	NA	NA	NA
					89	NA	NA	NA	NA	NA	NA	NA	NA	NA	NA	NA	NA	NA	NA	NA	NA	NA	NA	NA	NA	NA	NA	NA	NA	NA	NA	NA	NA	NA	NA	NA	NA	NA	NA	NA	NA	NA	NA	NA	NA	NA	NA	NA	NA
					90	NA	NA	NA	NA	NA	NA	NA	NA	NA	NA	NA	NA	NA	NA	NA	NA	NA	NA	NA	NA	NA	NA	NA	NA	NA	NA	NA	NA	NA	NA	NA	NA	NA	NA	NA	NA	NA	NA	NA	NA	NA	NA	NA	NA
					91	NA	NA	NA	NA	NA	NA	NA	NA	NA	NA	NA	NA	NA	NA	NA	NA	NA	NA	NA	NA	NA	NA	NA	NA	NA	NA	NA	NA	NA	NA	NA	NA	NA	NA	NA	NA	NA	NA	NA	NA	NA	NA	NA	NA
					92	NA	NA	NA	NA	NA	NA	NA	NA	NA	NA	NA	NA	NA	NA	NA	NA	NA	NA	NA	NA	NA	NA	NA	NA	NA	NA	NA	NA	NA	NA	NA	NA	NA	NA	NA	NA	NA	NA	NA	NA	NA	NA	NA	NA
					93	NA	NA	NA	NA	NA	NA	NA	NA	NA	NA	NA	NA	NA	NA	NA	NA	NA	NA	NA	NA	NA	NA	NA	NA	NA	NA	NA	NA	NA	NA	NA	NA	NA	NA	NA	NA	NA	NA	NA	NA	NA	NA	NA	NA
					94	NA	NA	NA	NA	NA	NA	NA	NA	NA	NA	NA	NA	NA	NA	NA	NA	NA	NA	NA	NA	NA	NA	NA	NA	NA	NA	NA	NA	NA	NA	NA	NA	NA	NA	NA	NA	NA	NA	NA	NA	NA	NA	NA	NA
					95	NA	NA	NA	NA	NA	NA	NA	NA	NA	NA	NA	NA	NA	NA	NA	NA	NA	NA	NA	NA	NA	NA	NA	NA	NA	NA	NA	NA	NA	NA	NA	NA	NA	NA	NA	NA	NA	NA	NA	NA	NA	NA	NA	NA
					96	NA	NA	NA	NA	NA	NA	NA	NA	NA	NA	NA	NA	NA	NA	NA	NA	NA	NA	NA	NA	NA	NA	NA	NA	NA	NA	NA	NA	NA	NA	NA	NA	NA	NA	NA	NA	NA	NA	NA	NA	NA	NA	NA	NA
					97	NA	NA	NA	NA	NA	NA	NA	NA	NA	NA	NA	NA	NA	NA	NA	NA	NA	NA	NA	NA	NA	NA	NA	NA	NA	NA	NA	NA	NA	NA	NA	NA	NA	NA	NA	NA	NA	NA	NA	NA	NA	NA	NA	NA
					98	NA	NA	NA	NA	NA	NA	NA	NA	NA	NA	NA	NA	NA	NA	NA	NA	NA	NA	NA	NA	NA	NA	NA	NA	NA	NA	NA	NA	NA	NA	NA	NA	NA	NA	NA	NA	NA	NA	NA	NA	NA	NA	NA	NA
					99	NA	NA	NA	NA	NA	NA	NA	NA	NA	NA	NA	NA	NA	NA	NA	NA	NA	NA	NA	NA	NA	NA	NA	NA	NA	NA	NA	NA	NA	NA	NA	NA	NA	NA	NA	NA	NA	NA	NA	NA	NA	NA	NA	NA
					100	NA	NA	NA	NA	NA	NA	NA	NA	NA	NA	NA	NA	NA	NA	NA	NA	NA	NA	NA	NA	NA	NA	NA	NA	NA	NA	NA	NA	NA	NA	NA	NA	NA	NA	NA	NA	NA	NA	NA	NA	NA	NA	NA	NA
					101	NA	NA	NA	NA	NA	NA	NA	NA	NA	NA	NA	NA	NA	NA	NA	NA	NA	NA	NA	NA	NA	NA	NA	NA	NA	NA	NA	NA	NA	NA	NA	NA	NA	NA	NA	NA	NA	NA	NA	NA	NA	NA	NA	NA
					102	NA	NA	NA	NA	NA	NA	NA	NA	NA	NA	NA	NA	NA	NA	NA	NA	NA	NA	NA	NA	NA	NA	NA	NA	NA	NA	NA	NA	NA	NA	NA	NA	NA	NA	NA	NA	NA	NA	NA	NA	NA	NA	NA	NA
					103	NA	NA	NA	NA	NA	NA	NA	NA	NA	NA	NA	NA	NA	NA	NA	NA	NA	NA	NA	NA	NA	NA	NA	NA	NA	NA	NA	NA	NA	NA	NA	NA	NA	NA	NA	NA	NA	NA	NA	NA	NA	NA	NA	NA
					104	NA	NA	NA	NA	NA	NA	NA	NA	NA	NA	NA	NA	NA	NA	NA	NA	NA	NA	NA	NA	NA	NA	NA	NA	NA	NA	NA	NA	NA	NA	NA	NA	NA	NA	NA	NA	NA	NA	NA	NA	NA	NA	NA	NA
					105	NA	NA	NA	NA	NA	NA	NA	NA	NA	NA	NA	NA	NA	NA	NA	NA	NA	NA	NA	NA	NA	NA	NA	NA	NA	NA	NA	NA	NA	NA	NA	NA	NA	NA	NA	NA	NA	NA	NA	NA	NA	NA	NA	NA
					106	NA	NA	NA	NA	NA	NA	NA	NA	NA	NA	NA	NA	NA	NA	NA	NA	NA	NA	NA	NA	NA	NA	NA	NA	NA	NA	NA	NA	NA	NA	NA	NA	NA	NA	NA	NA	NA	NA	NA	NA	NA	NA	NA	NA
					107	NA	NA	NA	NA	NA	NA	NA	NA	NA	NA	NA	NA	NA	NA	NA	NA	NA	NA	NA	NA	NA	NA	NA	NA	NA	NA	NA	NA	NA	NA	NA	NA	NA	NA	NA	NA	NA	NA	NA	NA	NA	NA	NA	NA
					108	NA	NA	NA	NA	NA	NA	NA	NA	NA	NA	NA	NA	NA	NA	NA	NA	NA	NA	NA	NA	NA	NA	NA	NA	NA	NA	NA	NA	NA	NA	NA	NA	NA	NA	NA	NA	NA	NA	NA	NA	NA	NA	NA	NA
					109	NA	NA	NA	NA	NA	NA	NA	NA	NA	NA	NA	NA	NA	NA	NA	NA	NA	NA	NA	NA	NA	NA	NA	NA	NA	NA	NA	NA	NA	NA	NA	NA	NA	NA	NA	NA	NA	NA	NA	NA	NA	NA	NA	NA
					110	NA	NA	NA	NA	NA	NA	NA	NA	NA	NA	NA	NA	NA	NA	NA	NA	NA	NA	NA	NA	NA	NA	NA	NA	NA	NA	NA	NA	NA	NA	NA	NA	NA	NA	NA	NA	NA	NA	NA	NA	NA	NA	NA	NA
[truncated: 76 more columns]

## Sheet: Nic96
Nic96-GFP						1								2								3								4								5								6
						Ic				Ir		Ibg		Ic				Ir		Ibg		Ic				Ir		Ibg		Ic				Ir		Ibg		Ic				Ir		Ibg		Ic
							294.015				158.903		105.278		286.587				157.988		111.735		337.569				214.259		117.07		369.168				223.488		122.901		284.657				218.625		120.515		332.366
							188.737								174.852								220.499								246.266								164.142								212.214
	average	median	SEM	n		Relative accumulation (RA)					53.6254			Relative accumulation (RA)					46.2523			Relative accumulation (RA)					97.189			Relative accumulation (RA)					100.587			Relative accumulation (RA)					98.1103			Relative accumulation (RA)
RA:	2.39644	2.26282	0.170667	30		3.51954								3.78039								2.26877								2.44829								1.67304								2.74479
	p-value
	3.09927e-10
						150416_VisSt_Nic96GFP01_02Crop_1.tifGFP_x_lc	150416_VisSt_Nic96GFP01_02Crop_1.tifGFP_y_lc	150416_VisSt_Nic96GFP01_02Crop_1.tifmCh_x_cap	150416_VisSt_Nic96GFP01_02Crop_1.tifmCh_y_cap	150416_VisSt_Nic96GFP01_02Crop_1.tifGFP_x_lr	150416_VisSt_Nic96GFP01_02Crop_1.tifGFP_y_lr	150416_VisSt_Nic96GFP01_02Crop_1.tifGFP_x_bg	150416_VisSt_Nic96GFP01_02Crop_1.tifGFP_y_bg	150416_VisSt_Nic96GFP01_02Crop_2.tifGFP_x_lc	150416_VisSt_Nic96GFP01_02Crop_2.tifGFP_y_lc	150416_VisSt_Nic96GFP01_02Crop_2.tifmCh_x_cap	150416_VisSt_Nic96GFP01_02Crop_2.tifmCh_y_cap	150416_VisSt_Nic96GFP01_02Crop_2.tifGFP_x_lr	150416_VisSt_Nic96GFP01_02Crop_2.tifGFP_y_lr	150416_VisSt_Nic96GFP01_02Crop_2.tifGFP_x_bg	150416_VisSt_Nic96GFP01_02Crop_2.tifGFP_y_bg	150416_VisSt_Nic96GFP01_03Crop_1.tifGFP_x_lc	150416_VisSt_Nic96GFP01_03Crop_1.tifGFP_y_lc	150416_VisSt_Nic96GFP01_03Crop_1.tifmCh_x_cap	150416_VisSt_Nic96GFP01_03Crop_1.tifmCh_y_cap	150416_VisSt_Nic96GFP01_03Crop_1.tifGFP_x_lr	150416_VisSt_Nic96GFP01_03Crop_1.tifGFP_y_lr	150416_VisSt_Nic96GFP01_03Crop_1.tifGFP_x_bg	150416_VisSt_Nic96GFP01_03Crop_1.tifGFP_y_bg	150416_VisSt_Nic96GFP01_03Crop_2.tifGFP_x_lc	150416_VisSt_Nic96GFP01_03Crop_2.tifGFP_y_lc	150416_VisSt_Nic96GFP01_03Crop_2.tifmCh_x_cap	150416_VisSt_Nic96GFP01_03Crop_2.tifmCh_y_cap	150416_VisSt_Nic96GFP01_03Crop_2.tifGFP_x_lr	150416_VisSt_Nic96GFP01_03Crop_2.tifGFP_y_lr	150416_VisSt_Nic96GFP01_03Crop_2.tifGFP_x_bg	150416_VisSt_Nic96GFP01_03Crop_2.tifGFP_y_bg	150416_VisSt_Nic96GFP01_03Crop_3.tifGFP_x_lc	150416_VisSt_Nic96GFP01_03Crop_3.tifGFP_y_lc	150416_VisSt_Nic96GFP01_03Crop_3.tifmCh_x_cap	150416_VisSt_Nic96GFP01_03Crop_3.tifmCh_y_cap	150416_VisSt_Nic96GFP01_03Crop_3.tifGFP_x_lr	150416_VisSt_Nic96GFP01_03Crop_3.tifGFP_y_lr	150416_VisSt_Nic96GFP01_03Crop_3.tifGFP_x_bg	150416_VisSt_Nic96GFP01_03Crop_3.tifGFP_y_bg	150416_VisSt_Nic96GFP01_04Crop_1.tifGFP_x_lc	150416_VisSt_Nic96GFP01_04Crop_1.tifGFP_y_lc	150416_VisSt_Nic96GFP01_04Crop_1.tifmCh_x_cap	150416_VisSt_Nic96GFP01_04Crop_1.tifmCh_y_cap
					1	0	206	0	477	0	191	0	104	0	305	0	141	0	152	0	99	0	153	0	553	0	268	0	112	0	244	0	167	0	209	0	133	0	263	0	233	0	198	0	161	0	299	0	247
					2	0.064	234.537	0.064	618.995	0.064	175.286	0.064	102.629	0.064	330.72	0.064	189.505	0.064	156.136	0.064	97.669	0.064	143.63	0.064	614.34	0.064	237.324	0.064	117.812	0.064	240.904	0.064	210.999	0.064	197.974	0.064	127.979	0.064	290.208	0.064	278	0.064	184.135	0.064	134.86	0.064	322.133	0.064	293.783
					3	0.128	277.253	0.128	694.433	0.128	169.453	0.128	102.88	0.128	334.76	0.128	272.544	0.128	146.609	0.128	107.125	0.128	148.026	0.128	667.324	0.128	211.886	0.128	124.399	0.128	263.425	0.128	262.916	0.128	193.703	0.128	120.064	0.128	343.436	0.128	329	0.128	198.184	0.128	116.7	0.128	350.592	0.128	331.636
					4	0.192	305.542	0.192	710.826	0.192	163.532	0.192	107.756	0.192	299.08	0.192	368.819	0.192	138.732	0.192	109.229	0.192	143.957	0.192	720.497	0.192	209.454	0.192	127.465	0.192	278.03	0.192	343.413	0.192	192.005	0.192	114.618	0.192	316.783	0.192	296	0.192	215.826	0.192	121.401	0.192	397.067	0.192	372.329
					5	0.256	315.697	0.256	751.891	0.256	152.366	0.256	108.186	0.256	261.92	0.256	425.177	0.256	135.481	0.256	98.84	0.256	163.109	0.256	781.409	0.256	214.95	0.256	112.163	0.256	277.054	0.256	438.816	0.256	199.817	0.256	116.677	0.256	291.751	0.256	271	0.256	226.123	0.256	132.233	0.256	439.542	0.256	425.993
					6	0.32	314.363	0.32	801.379	0.32	141.534	0.32	100.332	0.32	244	0.32	456.328	0.32	153.246	0.32	104.332	0.32	195.453	0.32	833.286	0.32	209.478	0.32	93.643	0.32	306.177	0.32	507.767	0.32	222.441	0.32	119.782	0.32	267.553	0.32	300	0.32	225.631	0.32	124.243	0.32	404.251	0.32	471.52
					7	0.384	257.027	0.384	820.341	0.384	144.262	0.384	97.462	0.384	243.708	0.384	484.334	0.384	149.402	0.384	109.015	0.384	238.869	0.384	847.424	0.384	200.225	0.384	105.889	0.384	331.994	0.384	533.853	0.384	272.933	0.384	122.821	0.384	252.751	0.384	318	0.384	219.807	0.384	113.608	0.384	362.99	0.384	468.374
					8	0.448	231	0.448	800.088	0.448	135.132	0.448	97.694	0.448	222.663	0.448	471.216	0.448	139.446	0.448	106.526	0.448	285.085	0.448	847.929	0.448	193.115	0.448	112.777	0.448	340.568	0.448	537.958	0.448	311.107	0.448	129.477	0.448	279.198	0.448	334	0.448	247.692	0.448	111.902	0.448	351.654	0.448	468.261
					9	0.512	211.9	0.512	770.067	0.512	133.74	0.512	97.858	0.512	207.361	0.512	439.119	0.512	147.426	0.512	104.704	0.512	330.395	0.512	829.644	0.512	200.601	0.512	114.403	0.512	346.688	0.512	559.243	0.512	342.182	0.512	139.949	0.512	307.275	0.512	386	0.512	224.85	0.512	110.569	0.512	360.05	0.512	477.506
					10	0.576	192.4	0.576	761.623	0.576	141.83	0.576	106.778	0.576	206.277	0.576	430.037	0.576	156.238	0.576	103.878	0.576	341.593	0.576	772.768	0.576	211.4	0.576	109.937	0.576	348.053	0.576	596.774	0.576	356.791	0.576	149.499	0.576	330.51	0.576	435	0.576	202.492	0.576	113.388	0.576	365.721	0.576	461.455
					11	0.64	198.2	0.64	740.385	0.64	128.21	0.64	115.424	0.64	221.208	0.64	422.441	0.64	139.298	0.64	104.568	0.64	313.883	0.64	729.103	0.64	207.62	0.64	110.258	0.64	339.948	0.64	671.849	0.64	304.512	0.64	151.095	0.64	309.842	0.64	383	0.64	206.996	0.64	120.085	0.64	362.418	0.64	450.189
					12	0.704	196	0.704	705.854	0.704	120.78	0.704	111.201	0.704	214.855	0.704	433.511	0.704	137.778	0.704	109.949	0.704	296.552	0.704	682.483	0.704	192.799	0.704	111.964	0.704	342.17	0.704	691.046	0.704	258.354	0.704	131.569	0.704	297.077	0.704	355	0.704	235.653	0.704	122.403	0.704	348.882	0.704	450.13
					13	0.768	183.2	0.768	746.526	0.768	118.26	0.768	110.996	0.768	214.972	0.768	428.828	0.768	138.948	0.768	114.917	0.768	326.249	0.768	664.874	0.768	180.858	0.768	117.81	0.768	351.055	0.768	676.575	0.768	236.913	0.768	119.334	0.768	306.184	0.768	338	0.768	258.464	0.768	124.125	0.768	338.498	0.768	444.694
					14	0.832	175.5	0.832	784.452	0.832	137.14	0.832	106.32	0.832	241.92	0.832	466.862	0.832	131.386	0.832	107.843	0.832	346.368	0.832	651.033	0.832	185.53	0.832	120.288	0.832	346.12	0.832	661.68	0.832	213.269	0.832	125.945	0.832	302.566	0.832	382	0.832	246.656	0.832	127.085	0.832	369.65	0.832	452.204
					15	0.896	190.1	0.896	786.978	0.896	148.7	0.896	106.068	0.896	266.582	0.896	510.782	0.896	123.954	0.896	95.227	0.896	336.222	0.896	620.593	0.896	203.467	0.896	120.984	0.896	345.684	0.896	712.434	0.896	180.996	0.896	132.458	0.896	327.938	0.896	371	0.896	250.607	0.896	121.66	0.896	380.021	0.896	485.85
					16	0.96	204	0.96	794.319	0.96	137.82	0.96	111.591	0.96	278.96	0.96	530.95	0.96	141.572	0.96	99.878	0.96	321.082	0.96	583.359	0.96	204.881	0.96	117.939	0.96	366.65	0.96	763.113	0.96	160.925	0.96	130.153	0.96	360.426	0.96	316.393	0.96	259.645	0.96	118.295	0.96	379.092	0.96	541.144
					17	1.024	216.1	1.024	798.36	1.024	144.7	1.024	109.274	1.024	308.952	1.024	558.541	1.024	137.273	1.024	106.511	1.024	322.855	1.024	567.841	1.024	183.334	1.024	117.342	1.024	396.824	1.024	760.318	1.024	160.44	1.024	125.537	1.024	352.591	1.024	268.73	1.024	240.046	1.024	121.683	1.024	371.161	1.024	533.704
					18	1.088	263.736	1.088	803.88	1.088	152.09	1.088	107.805	1.088	314.655	1.088	597.254	1.088	123.448	1.088	106.12	1.088	320.797	1.088	584.875	1.088	188.844	1.088	114.83	1.088	411.708	1.088	713.39	1.088	152.336	1.088	134.55	1.088	322.03	1.088	201.737	1.088	214.352	1.088	120.285	1.088	396.158	1.088	491.816
					19	1.152	341.555	1.152	872.32	1.152	156.385	1.152	106.832	1.152	292.781	1.152	598.834	1.152	113.37	1.152	109.565	1.152	322.724	1.152	595.793	1.152	202.606	1.152	119.912	1.152	378.295	1.152	636.651	1.152	148.421	1.152	149.096	1.152	291.063	1.152	156.237	1.152	207.123	1.152	118.727	1.152	414.789	1.152	465.229
					20	1.216	373.615	1.216	926.12	1.216	150.833	1.216	105.375	1.216	288.453	1.216	602.371	1.216	113.148	1.216	108.72	1.216	323.866	1.216	564.821	1.216	194.84	1.216	126.511	1.216	360.805	1.216	591.259	1.216	167.965	1.216	143.969	1.216	286.322	NA	NA	1.216	202.666	1.216	113.49	1.216	403.259	1.216	417.267
					21	1.28	347.735	1.28	893.24	1.28	142.7	1.28	113.56	1.28	280.081	1.28	589.164	1.28	132.213	1.28	93.567	1.28	314.111	1.28	546.293	1.28	193.22	1.28	125.278	1.28	361.773	1.28	590.966	1.28	177.336	1.28	127.071	1.28	288.686	NA	NA	1.28	184.242	1.28	109.619	1.28	363.488	1.28	365.963
					22	1.344	336.302	1.344	854.28	1.344	128.241	1.344	125.198	1.344	261.236	1.344	541.479	1.344	133.73	1.344	87.14	1.344	318.3	1.344	559.667	1.344	198.44	1.344	113.918	1.344	409.277	1.344	645.482	1.344	173.432	1.344	119.915	1.344	297.212	NA	NA	1.344	176.191	1.344	111.37	1.344	312.69	1.344	251.671
					23	1.408	328.531	1.408	823.96	1.408	126.777	1.408	124.013	1.408	282.36	1.408	605.044	1.408	120.963	1.408	93.423	1.408	343.378	1.408	613.509	1.408	178.54	1.408	112.133	1.408	459.954	1.408	703.156	1.408	183.992	1.408	129.086	1.408	250.206	NA	NA	1.408	174.256	1.408	119.932	1.408	283.678	1.408	170.776
					24	1.472	317.082	1.472	761.08	1.472	132.625	1.472	112.992	1.472	335.82	1.472	653.642	1.472	111.408	1.472	104.503	1.472	404.552	1.472	595.669	1.472	166.56	1.472	120.7	1.472	470.269	1.472	702.429	1.472	216.558	1.472	140.134	1.472	253.635	NA	NA	1.472	178.256	1.472	116.527	1.472	293.225	1.472	111.958
					25	1.536	322.021	1.536	712.827	1.536	130.944	1.536	117.556	1.536	356.993	1.536	635.805	1.536	113.231	1.536	116.345	1.536	473.171	1.536	517.965	1.536	186.46	1.536	132.856	1.536	446.327	1.536	715.084	1.536	242.299	1.536	136.987	1.536	254.384	NA	NA	1.536	182.111	1.536	112.413	1.536	266.991	NA	NA
					26	1.6	325.041	1.6	687.115	1.6	125.597	1.6	109.515	1.6	333.547	1.6	588.238	1.6	115	1.6	111.944	1.6	510.541	1.6	432.103	1.6	202.14	1.6	131.151	1.6	454.546	1.6	709.493	1.6	253.99	1.6	125.098	1.6	235.924	NA	NA	1.6	190.653	1.6	95.552	1.6	262.353	NA	NA
					27	1.664	343.518	1.664	645.06	1.664	117.797	1.664	99.062	1.664	300.99	1.664	555.445	1.664	131.049	1.664	103.011	1.664	542.999	1.664	308.18	1.664	183.54	1.664	120.673	1.664	471.585	NA	NA	1.664	261.649	1.664	115.605	1.664	258.684	NA	NA	1.664	192.019	1.664	109.202	1.664	309.502	NA	NA
					28	1.728	351	1.728	579.431	1.728	112.433	1.728	96.259	1.728	293.717	1.728	559.947	1.728	160.703	1.728	98.94	1.728	554.767	1.728	168.053	1.728	159.72	1.728	115.377	1.728	490.535	NA	NA	1.728	270.6	1.728	111.964	1.728	267.631	NA	NA	1.728	200.955	1.728	125.155	1.728	337.131	NA	NA
					29	1.792	348.548	1.792	476.409	1.792	111.848	1.792	91.194	1.792	301.144	1.792	593.838	1.792	184.08	1.792	99.955	1.792	544.164	NA	NA	1.792	145.86	1.792	120.896	1.792	500.738	NA	NA	1.792	287.847	1.792	121.59	1.792	248.062	NA	NA	1.792	205.349	1.792	133.284	1.792	353.863	NA	NA
					30	1.856	378.306	1.856	355.49	1.856	112.746	1.856	85.235	1.856	284.041	1.856	595.631	1.856	164.327	1.856	111.469	1.856	521.929	NA	NA	1.856	160.376	1.856	125.652	1.856	514.743	NA	NA	1.856	300.146	1.856	127.737	1.856	215.788	NA	NA	1.856	196.413	1.856	125.072	1.856	357.082	NA	NA
					31	1.92	349.362	1.92	257.387	1.92	113.685	1.92	92.832	1.92	275.13	1.92	555.43	1.92	134.21	1.92	122.369	1.92	489.409	NA	NA	1.92	169.648	1.92	125.442	1.92	522.972	NA	NA	1.92	275.097	1.92	128.936	1.92	206.362	NA	NA	1.92	208.834	1.92	120.25	1.92	353.541	NA	NA
					32	1.984	296.754	1.984	185.163	1.984	112.455	1.984	104.417	1.984	303.056	1.984	500.339	1.984	127.022	1.984	130.558	1.984	411.184	NA	NA	1.984	181.845	1.984	121.964	1.984	506.905	NA	NA	1.984	252.839	1.984	115.041	1.984	233.939	NA	NA	1.984	220.028	1.984	113.439	1.984	354.781	NA	NA
					33	2.048	299.96	2.048	126.887	2.048	115.704	2.048	104.08	2.048	340.731	2.048	389.523	2.048	138.295	2.048	128.518	NA	NA	NA	NA	2.048	196.697	2.048	122.479	2.048	439.582	NA	NA	2.048	254.555	2.048	109.051	NA	NA	NA	NA	2.048	224.998	2.048	103.84	2.048	330.362	NA	NA
					34	2.112	330.32	2.112	135.62	2.112	124.5	2.112	102.16	2.112	391.656	2.112	297.562	2.112	141.979	2.112	129.511	NA	NA	NA	NA	2.112	193.79	2.112	117.582	2.112	372.596	NA	NA	2.112	257.476	2.112	121.264	NA	NA	NA	NA	2.112	240.433	2.112	112.17	2.112	299.808	NA	NA
					35	2.176	351.2	2.176	145.339	2.176	128.015	2.176	101.08	2.176	391.208	2.176	255.579	2.176	146.957	2.176	133.335	NA	NA	NA	NA	2.176	190.493	2.176	102.331	2.176	338.4	NA	NA	2.176	249.406	2.176	126.278	NA	NA	NA	NA	2.176	261.097	2.176	115.595	2.176	283.309	NA	NA
					36	2.24	374	2.24	147.806	2.24	123.67	2.24	99.16	NA	NA	2.24	208.271	2.24	145.571	2.24	130.682	NA	NA	NA	NA	2.24	184.84	2.24	101.247	2.24	386.299	NA	NA	2.24	223.871	2.24	117.694	NA	NA	NA	NA	2.24	252.776	2.24	119.308	2.24	258.639	NA	NA
					37	2.304	384.44	2.304	141.266	2.304	130.061	2.304	102.68	NA	NA	2.304	151.625	2.304	135.486	2.304	117.602	NA	NA	NA	NA	2.304	173.997	2.304	111.685	2.304	357.642	NA	NA	2.304	197.886	2.304	118.308	NA	NA	NA	NA	2.304	228.47	2.304	124.779	2.304	226.911	NA	NA
					38	2.368	389.6	2.368	163.281	2.368	146.202	2.368	109.44	NA	NA	NA	NA	2.368	145.355	2.368	113.637	NA	NA	NA	NA	2.368	183.438	2.368	113.774	2.368	331.013	NA	NA	2.368	202.303	2.368	118.413	NA	NA	NA	NA	2.368	214.209	2.368	134.234	2.368	221.341	NA	NA
					39	2.432	390.64	2.432	183.503	2.432	155.767	2.432	116.44	NA	NA	NA	NA	2.432	153.358	2.432	117.617	NA	NA	NA	NA	2.432	193.627	2.432	114.774	2.432	347.3	NA	NA	2.432	198.559	2.432	112.223	NA	NA	NA	NA	2.432	201.253	2.432	140.628	2.432	213.893	NA	NA
					40	2.496	382.181	2.496	227.044	2.496	163.867	2.496	106.88	NA	NA	NA	NA	2.496	151.003	2.496	119.473	NA	NA	NA	NA	2.496	185.576	2.496	118.205	2.496	326.6	NA	NA	2.496	205.481	2.496	115.247	NA	NA	NA	NA	2.496	189.908	2.496	135.094	2.496	195.119	NA	NA
					41	2.56	363.52	2.56	278.726	2.56	174.273	2.56	98.64	NA	NA	NA	NA	2.56	157.1	2.56	106.369	NA	NA	NA	NA	2.56	199.838	2.56	116.88	2.56	278.3	NA	NA	2.56	197.183	2.56	112.968	NA	NA	NA	NA	2.56	177.11	2.56	114.459	NA	NA	NA	NA
					42	2.624	317.819	2.624	310.861	2.624	182.724	2.624	99.84	NA	NA	NA	NA	2.624	163.2	2.624	97.991	NA	NA	NA	NA	2.624	221.609	2.624	119.839	2.624	243.4	NA	NA	2.624	187.473	2.624	110.141	NA	NA	NA	NA	2.624	192.383	2.624	113.473	NA	NA	NA	NA
					43	2.688	267.639	2.688	309.714	2.688	220.992	2.688	100	NA	NA	NA	NA	2.688	145.718	2.688	118.875	NA	NA	NA	NA	2.688	239.696	2.688	121.962	2.688	227.3	NA	NA	2.688	187.963	2.688	114.255	NA	NA	NA	NA	2.688	209.896	2.688	128.954	NA	NA	NA	NA
					44	2.752	234.168	NA	NA	2.752	271.493	2.752	100.92	NA	NA	NA	NA	2.752	148.739	2.752	137.301	NA	NA	NA	NA	2.752	219.726	2.752	123.054	NA	NA	NA	NA	2.752	195.596	2.752	116.281	NA	NA	NA	NA	2.752	232.977	2.752	129.704	NA	NA	NA	NA
					45	2.816	218.32	NA	NA	2.816	296.351	2.816	105.6	NA	NA	NA	NA	2.816	174.275	2.816	144.52	NA	NA	NA	NA	2.816	223.188	2.816	118.896	NA	NA	NA	NA	2.816	227.671	2.816	114.665	NA	NA	NA	NA	2.816	229.048	2.816	113.948	NA	NA	NA	NA
					46	2.88	201.335	NA	NA	2.88	311.692	2.88	109.68	NA	NA	NA	NA	2.88	184.23	2.88	135.983	NA	NA	NA	NA	2.88	234.473	2.88	122.659	NA	NA	NA	NA	2.88	251.128	2.88	110.434	NA	NA	NA	NA	2.88	193.119	2.88	102.841	NA	NA	NA	NA
					47	2.944	198.434	NA	NA	2.944	293.568	2.944	109.431	NA	NA	NA	NA	2.944	178.621	2.944	128.571	NA	NA	NA	NA	2.944	251.586	2.944	123.983	NA	NA	NA	NA	2.944	250.385	2.944	112.079	NA	NA	NA	NA	2.944	172.453	2.944	112.27	NA	NA	NA	NA
					48	3.008	216.465	NA	NA	3.008	277.225	3.008	102.747	NA	NA	NA	NA	3.008	177.285	3.008	118.199	NA	NA	NA	NA	3.008	251.881	3.008	121.96	NA	NA	NA	NA	3.008	253.546	3.008	118.153	NA	NA	NA	NA	3.008	153.018	3.008	124.841	NA	NA	NA	NA
					49	3.072	246.895	NA	NA	3.072	232.869	3.072	99.7	NA	NA	NA	NA	3.072	185.039	3.072	111.978	NA	NA	NA	NA	3.072	246.509	3.072	125.638	NA	NA	NA	NA	3.072	274.894	3.072	117.685	NA	NA	NA	NA	3.072	156.911	3.072	132.839	NA	NA	NA	NA
					50	3.136	252.731	NA	NA	3.136	185.28	3.136	100.795	NA	NA	NA	NA	3.136	184.206	3.136	107.644	NA	NA	NA	NA	3.136	238.868	3.136	122.828	NA	NA	NA	NA	3.136	265.22	3.136	110.841	NA	NA	NA	NA	3.136	194.423	3.136	130.253	NA	NA	NA	NA
					51	3.2	248.862	NA	NA	NA	NA	3.2	102.422	NA	NA	NA	NA	3.2	177.173	3.2	111.688	NA	NA	NA	NA	3.2	241.112	3.2	123.401	NA	NA	NA	NA	3.2	237.718	3.2	109.005	NA	NA	NA	NA	3.2	231.075	3.2	132.517	NA	NA	NA	NA
					52	3.264	270.571	NA	NA	NA	NA	3.264	114.45	NA	NA	NA	NA	3.264	176.26	3.264	114.433	NA	NA	NA	NA	3.264	249.228	3.264	129.502	NA	NA	NA	NA	3.264	231.16	3.264	106.735	NA	NA	NA	NA	3.264	257.518	3.264	144.162	NA	NA	NA	NA
					53	3.328	294.425	NA	NA	NA	NA	NA	NA	NA	NA	NA	NA	3.328	182.981	3.328	114.782	NA	NA	NA	NA	3.328	237.256	3.328	131.829	NA	NA	NA	NA	3.328	224.08	3.328	101.965	NA	NA	NA	NA	3.328	249.107	3.328	134.389	NA	NA	NA	NA
					54	3.392	336	NA	NA	NA	NA	NA	NA	NA	NA	NA	NA	3.392	189.558	3.392	118.154	NA	NA	NA	NA	3.392	221.233	3.392	119.022	NA	NA	NA	NA	3.392	229.64	3.392	109.597	NA	NA	NA	NA	3.392	238.489	3.392	115.066	NA	NA	NA	NA
					55	3.456	398.349	NA	NA	NA	NA	NA	NA	NA	NA	NA	NA	3.456	183.588	NA	NA	NA	NA	NA	NA	3.456	227.812	3.456	114.422	NA	NA	NA	NA	3.456	256.76	3.456	115.204	NA	NA	NA	NA	3.456	258.92	3.456	111.919	NA	NA	NA	NA
					56	3.52	391.631	NA	NA	NA	NA	NA	NA	NA	NA	NA	NA	3.52	166.156	NA	NA	NA	NA	NA	NA	3.52	244.087	3.52	111.007	NA	NA	NA	NA	3.52	281.12	3.52	116.379	NA	NA	NA	NA	3.52	285.36	3.52	125.551	NA	NA	NA	NA
					57	3.584	372.773	NA	NA	NA	NA	NA	NA	NA	NA	NA	NA	3.584	171.378	NA	NA	NA	NA	NA	NA	3.584	278.477	3.584	106.911	NA	NA	NA	NA	3.584	256.04	3.584	121.539	NA	NA	NA	NA	3.584	302.73	3.584	136.188	NA	NA	NA	NA
					58	3.648	373.069	NA	NA	NA	NA	NA	NA	NA	NA	NA	NA	3.648	175.634	NA	NA	NA	NA	NA	NA	3.648	286.75	3.648	108.003	NA	NA	NA	NA	3.648	227.966	3.648	125.063	NA	NA	NA	NA	3.648	300.76	3.648	132.291	NA	NA	NA	NA
					59	3.712	341.777	NA	NA	NA	NA	NA	NA	NA	NA	NA	NA	3.712	173.661	NA	NA	NA	NA	NA	NA	3.712	258.524	3.712	121.955	NA	NA	NA	NA	3.712	208.351	3.712	127.565	NA	NA	NA	NA	3.712	276.18	3.712	129.965	NA	NA	NA	NA
					60	3.776	287.478	NA	NA	NA	NA	NA	NA	NA	NA	NA	NA	3.776	170.825	NA	NA	NA	NA	NA	NA	3.776	241.291	3.776	129.288	NA	NA	NA	NA	3.776	197.245	3.776	132.67	NA	NA	NA	NA	NA	NA	3.776	120.859	NA	NA	NA	NA
					61	3.84	268.359	NA	NA	NA	NA	NA	NA	NA	NA	NA	NA	3.84	173.384	NA	NA	NA	NA	NA	NA	3.84	239.681	3.84	128.427	NA	NA	NA	NA	3.84	185.134	3.84	133.293	NA	NA	NA	NA	NA	NA	3.84	114.857	NA	NA	NA	NA
					62	NA	NA	NA	NA	NA	NA	NA	NA	NA	NA	NA	NA	3.904	183.348	NA	NA	NA	NA	NA	NA	3.904	227.121	3.904	128.332	NA	NA	NA	NA	3.904	164.686	3.904	128.317	NA	NA	NA	NA	NA	NA	3.904	114.135	NA	NA	NA	NA
					63	NA	NA	NA	NA	NA	NA	NA	NA	NA	NA	NA	NA	3.968	207.626	NA	NA	NA	NA	NA	NA	3.968	202.004	3.968	120.587	NA	NA	NA	NA	3.968	155.167	3.968	126.699	NA	NA	NA	NA	NA	NA	3.968	109.877	NA	NA	NA	NA
					64	NA	NA	NA	NA	NA	NA	NA	NA	NA	NA	NA	NA	4.032	190.757	NA	NA	NA	NA	NA	NA	4.032	191.615	4.032	108.256	NA	NA	NA	NA	4.032	157.965	4.032	127.826	NA	NA	NA	NA	NA	NA	4.032	109.454	NA	NA	NA	NA
					65	NA	NA	NA	NA	NA	NA	NA	NA	NA	NA	NA	NA	4.096	186.737	NA	NA	NA	NA	NA	NA	4.096	196.871	4.096	101.14	NA	NA	NA	NA	4.096	174.169	4.096	121.076	NA	NA	NA	NA	NA	NA	4.096	118.283	NA	NA	NA	NA
					66	NA	NA	NA	NA	NA	NA	NA	NA	NA	NA	NA	NA	4.16	195.969	NA	NA	NA	NA	NA	NA	4.16	208.727	4.16	101.481	NA	NA	NA	NA	4.16	190.003	4.16	115.858	NA	NA	NA	NA	NA	NA	4.16	121.28	NA	NA	NA	NA
					67	NA	NA	NA	NA	NA	NA	NA	NA	NA	NA	NA	NA	4.224	207.607	NA	NA	NA	NA	NA	NA	4.224	217.45	4.224	114.056	NA	NA	NA	NA	4.224	190.854	4.224	115.008	NA	NA	NA	NA	NA	NA	4.224	112.393	NA	NA	NA	NA
					68	NA	NA	NA	NA	NA	NA	NA	NA	NA	NA	NA	NA	4.288	219.069	NA	NA	NA	NA	NA	NA	4.288	210.191	4.288	125.315	NA	NA	NA	NA	4.288	182.215	4.288	115.897	NA	NA	NA	NA	NA	NA	4.288	100.396	NA	NA	NA	NA
					69	NA	NA	NA	NA	NA	NA	NA	NA	NA	NA	NA	NA	4.352	199.663	NA	NA	NA	NA	NA	NA	4.352	206.262	4.352	122.499	NA	NA	NA	NA	4.352	175.993	4.352	121.529	NA	NA	NA	NA	NA	NA	4.352	96.322	NA	NA	NA	NA
					70	NA	NA	NA	NA	NA	NA	NA	NA	NA	NA	NA	NA	4.416	164.172	NA	NA	NA	NA	NA	NA	4.416	204.182	4.416	114.332	NA	NA	NA	NA	4.416	167.538	4.416	131.91	NA	NA	NA	NA	NA	NA	4.416	91.555	NA	NA	NA	NA
					71	NA	NA	NA	NA	NA	NA	NA	NA	NA	NA	NA	NA	4.48	154.872	NA	NA	NA	NA	NA	NA	4.48	201.432	4.48	114.465	NA	NA	NA	NA	4.48	182.057	4.48	133.996	NA	NA	NA	NA	NA	NA	4.48	99.342	NA	NA	NA	NA
					72	NA	NA	NA	NA	NA	NA	NA	NA	NA	NA	NA	NA	4.544	160.321	NA	NA	NA	NA	NA	NA	4.544	212.192	4.544	119.54	NA	NA	NA	NA	4.544	202.068	4.544	129.153	NA	NA	NA	NA	NA	NA	4.544	116.87	NA	NA	NA	NA
					73	NA	NA	NA	NA	NA	NA	NA	NA	NA	NA	NA	NA	4.608	151.464	NA	NA	NA	NA	NA	NA	4.608	227.824	4.608	121.765	NA	NA	NA	NA	4.608	233.349	4.608	128.68	NA	NA	NA	NA	NA	NA	4.608	139.867	NA	NA	NA	NA
					74	NA	NA	NA	NA	NA	NA	NA	NA	NA	NA	NA	NA	4.672	135.323	NA	NA	NA	NA	NA	NA	4.672	244.37	4.672	117.175	NA	NA	NA	NA	4.672	290.842	4.672	130.869	NA	NA	NA	NA	NA	NA	4.672	136.614	NA	NA	NA	NA
					75	NA	NA	NA	NA	NA	NA	NA	NA	NA	NA	NA	NA	4.736	126.323	NA	NA	NA	NA	NA	NA	4.736	287.691	4.736	104.073	NA	NA	NA	NA	4.736	301.032	4.736	123.872	NA	NA	NA	NA	NA	NA	4.736	116.787	NA	NA	NA	NA
					76	NA	NA	NA	NA	NA	NA	NA	NA	NA	NA	NA	NA	4.8	129.935	NA	NA	NA	NA	NA	NA	4.8	282.273	4.8	116.196	NA	NA	NA	NA	NA	NA	4.8	119.078	NA	NA	NA	NA	NA	NA	4.8	124.39	NA	NA	NA	NA
					77	NA	NA	NA	NA	NA	NA	NA	NA	NA	NA	NA	NA	4.864	141.468	NA	NA	NA	NA	NA	NA	4.864	245.214	4.864	125.167	NA	NA	NA	NA	NA	NA	4.864	111.712	NA	NA	NA	NA	NA	NA	4.864	132.744	NA	NA	NA	NA
					78	NA	NA	NA	NA	NA	NA	NA	NA	NA	NA	NA	NA	4.928	153.489	NA	NA	NA	NA	NA	NA	4.928	237.478	4.928	115.317	NA	NA	NA	NA	NA	NA	4.928	113.077	NA	NA	NA	NA	NA	NA	4.928	133.287	NA	NA	NA	NA
					79	NA	NA	NA	NA	NA	NA	NA	NA	NA	NA	NA	NA	4.992	159.227	NA	NA	NA	NA	NA	NA	4.992	234.755	4.992	108.271	NA	NA	NA	NA	NA	NA	NA	NA	NA	NA	NA	NA	NA	NA	NA	NA	NA	NA	NA	NA
					80	NA	NA	NA	NA	NA	NA	NA	NA	NA	NA	NA	NA	5.056	140.621	NA	NA	NA	NA	NA	NA	5.056	213.33	5.056	105.759	NA	NA	NA	NA	NA	NA	NA	NA	NA	NA	NA	NA	NA	NA	NA	NA	NA	NA	NA	NA
					81	NA	NA	NA	NA	NA	NA	NA	NA	NA	NA	NA	NA	5.12	119.561	NA	NA	NA	NA	NA	NA	5.12	198.985	5.12	108.057	NA	NA	NA	NA	NA	NA	NA	NA	NA	NA	NA	NA	NA	NA	NA	NA	NA	NA	NA	NA
					82	NA	NA	NA	NA	NA	NA	NA	NA	NA	NA	NA	NA	5.184	133.406	NA	NA	NA	NA	NA	NA	5.184	199.51	5.184	107.508	NA	NA	NA	NA	NA	NA	NA	NA	NA	NA	NA	NA	NA	NA	NA	NA	NA	NA	NA	NA
					83	NA	NA	NA	NA	NA	NA	NA	NA	NA	NA	NA	NA	5.248	157.559	NA	NA	NA	NA	NA	NA	5.248	229.882	5.248	106.223	NA	NA	NA	NA	NA	NA	NA	NA	NA	NA	NA	NA	NA	NA	NA	NA	NA	NA	NA	NA
					84	NA	NA	NA	NA	NA	NA	NA	NA	NA	NA	NA	NA	5.312	154.913	NA	NA	NA	NA	NA	NA	5.312	244.083	5.312	106.756	NA	NA	NA	NA	NA	NA	NA	NA	NA	NA	NA	NA	NA	NA	NA	NA	NA	NA	NA	NA
					85	NA	NA	NA	NA	NA	NA	NA	NA	NA	NA	NA	NA	5.376	163.619	NA	NA	NA	NA	NA	NA	5.376	245.889	5.376	120.771	NA	NA	NA	NA	NA	NA	NA	NA	NA	NA	NA	NA	NA	NA	NA	NA	NA	NA	NA	NA
					86	NA	NA	NA	NA	NA	NA	NA	NA	NA	NA	NA	NA	5.44	156.032	NA	NA	NA	NA	NA	NA	5.44	238.008	NA	NA	NA	NA	NA	NA	NA	NA	NA	NA	NA	NA	NA	NA	NA	NA	NA	NA	NA	NA	NA	NA
					87	NA	NA	NA	NA	NA	NA	NA	NA	NA	NA	NA	NA	5.504	149.747	NA	NA	NA	NA	NA	NA	5.504	222.86	NA	NA	NA	NA	NA	NA	NA	NA	NA	NA	NA	NA	NA	NA	NA	NA	NA	NA	NA	NA	NA	NA
					88	NA	NA	NA	NA	NA	NA	NA	NA	NA	NA	NA	NA	5.568	170.944	NA	NA	NA	NA	NA	NA	5.568	221.04	NA	NA	NA	NA	NA	NA	NA	NA	NA	NA	NA	NA	NA	NA	NA	NA	NA	NA	NA	NA	NA	NA
					89	NA	NA	NA	NA	NA	NA	NA	NA	NA	NA	NA	NA	5.632	186.535	NA	NA	NA	NA	NA	NA	5.632	234.972	NA	NA	NA	NA	NA	NA	NA	NA	NA	NA	NA	NA	NA	NA	NA	NA	NA	NA	NA	NA	NA	NA
					90	NA	NA	NA	NA	NA	NA	NA	NA	NA	NA	NA	NA	5.696	192.79	NA	NA	NA	NA	NA	NA	NA	NA	NA	NA	NA	NA	NA	NA	NA	NA	NA	NA	NA	NA	NA	NA	NA	NA	NA	NA	NA	NA	NA	NA
					91	NA	NA	NA	NA	NA	NA	NA	NA	NA	NA	NA	NA	5.76	180.594	NA	NA	NA	NA	NA	NA	NA	NA	NA	NA	NA	NA	NA	NA	NA	NA	NA	NA	NA	NA	NA	NA	NA	NA	NA	NA	NA	NA	NA	NA
					92	NA	NA	NA	NA	NA	NA	NA	NA	NA	NA	NA	NA	5.824	163.147	NA	NA	NA	NA	NA	NA	NA	NA	NA	NA	NA	NA	NA	NA	NA	NA	NA	NA	NA	NA	NA	NA	NA	NA	NA	NA	NA	NA	NA	NA
					93	NA	NA	NA	NA	NA	NA	NA	NA	NA	NA	NA	NA	5.888	159.785	NA	NA	NA	NA	NA	NA	NA	NA	NA	NA	NA	NA	NA	NA	NA	NA	NA	NA	NA	NA	NA	NA	NA	NA	NA	NA	NA	NA	NA	NA
					94	NA	NA	NA	NA	NA	NA	NA	NA	NA	NA	NA	NA	5.952	179.238	NA	NA	NA	NA	NA	NA	NA	NA	NA	NA	NA	NA	NA	NA	NA	NA	NA	NA	NA	NA	NA	NA	NA	NA	NA	NA	NA	NA	NA	NA
					95	NA	NA	NA	NA	NA	NA	NA	NA	NA	NA	NA	NA	6.016	173.718	NA	NA	NA	NA	NA	NA	NA	NA	NA	NA	NA	NA	NA	NA	NA	NA	NA	NA	NA	NA	NA	NA	NA	NA	NA	NA	NA	NA	NA	NA
					96	NA	NA	NA	NA	NA	NA	NA	NA	NA	NA	NA	NA	6.08	170.186	NA	NA	NA	NA	NA	NA	NA	NA	NA	NA	NA	NA	NA	NA	NA	NA	NA	NA	NA	NA	NA	NA	NA	NA	NA	NA	NA	NA	NA	NA
					97	NA	NA	NA	NA	NA	NA	NA	NA	NA	NA	NA	NA	6.144	183.707	NA	NA	NA	NA	NA	NA	NA	NA	NA	NA	NA	NA	NA	NA	NA	NA	NA	NA	NA	NA	NA	NA	NA	NA	NA	NA	NA	NA	NA	NA
					98	NA	NA	NA	NA	NA	NA	NA	NA	NA	NA	NA	NA	6.208	185.644	NA	NA	NA	NA	NA	NA	NA	NA	NA	NA	NA	NA	NA	NA	NA	NA	NA	NA	NA	NA	NA	NA	NA	NA	NA	NA	NA	NA	NA	NA
					99	NA	NA	NA	NA	NA	NA	NA	NA	NA	NA	NA	NA	6.272	166.907	NA	NA	NA	NA	NA	NA	NA	NA	NA	NA	NA	NA	NA	NA	NA	NA	NA	NA	NA	NA	NA	NA	NA	NA	NA	NA	NA	NA	NA	NA
					100	NA	NA	NA	NA	NA	NA	NA	NA	NA	NA	NA	NA	6.336	173.542	NA	NA	NA	NA	NA	NA	NA	NA	NA	NA	NA	NA	NA	NA	NA	NA	NA	NA	NA	NA	NA	NA	NA	NA	NA	NA	NA	NA	NA	NA
					101	NA	NA	NA	NA	NA	NA	NA	NA	NA	NA	NA	NA	6.4	193.11	NA	NA	NA	NA	NA	NA	NA	NA	NA	NA	NA	NA	NA	NA	NA	NA	NA	NA	NA	NA	NA	NA	NA	NA	NA	NA	NA	NA	NA	NA
					102	NA	NA	NA	NA	NA	NA	NA	NA	NA	NA	NA	NA	6.464	192.21	NA	NA	NA	NA	NA	NA	NA	NA	NA	NA	NA	NA	NA	NA	NA	NA	NA	NA	NA	NA	NA	NA	NA	NA	NA	NA	NA	NA	NA	NA
					103	NA	NA	NA	NA	NA	NA	NA	NA	NA	NA	NA	NA	NA	NA	NA	NA	NA	NA	NA	NA	NA	NA	NA	NA	NA	NA	NA	NA	NA	NA	NA	NA	NA	NA	NA	NA	NA	NA	NA	NA	NA	NA	NA	NA
[truncated: 196 more columns]

[truncated: 8 more sheets: Nup84, Nup53, Nup159, Nup59, Nup116, Gle2, Nup42, Gle1]
