# Supplementary material for: DNA circles promote yeast ageing in part through stimulating the reorganization of nuclear pore complexes
Source: eLife. 2022 Apr 4;11:e71196. doi: 10.7554/eLife.71196 (PMC9020822; doi:10.7554/eLife.71196)
Supplement: Figure 2—source data 1. [file elife-71196-fig2-data1.xlsx]

## Sheet: Overview
Reference:
Nup84-mCh
					strain	Nup170_young				Nup170_young	File	250420_NupNup_TR86.3.4_FL_1_MMStack_Pos21cell1age1	250420_NupNup_TR86.3.4_FL_1_MMStack_Pos21cell2age1	250420_NupNup_TR86.3.4_FL_1_MMStack_Pos22cell1age2	250420_NupNup_TR86.3.4_FL_1_MMStack_Pos22cell2age2	250420_NupNup_TR86.3.4_FL_1_MMStack_Pos22cell2age2	250420_NupNup_TR86.3.4_FL_1_MMStack_Pos22cell4age2	250420_NupNup_TR86.3.4_FL_1_MMStack_Pos23cell1age1	250420_NupNup_TR86.3.4_FL_1_MMStack_Pos23cell3age1	250420_NupNup_TR86.3.4_FL_1_MMStack_Pos23cell5age1	250420_NupNup_TR86.3.4_FL_1_MMStack_Pos24cell1age1	250420_NupNup_TR86.3.4_FL_1_MMStack_Pos24cell2age1	250420_NupNup_TR86.3.4_FL_1_MMStack_Pos24cell5age1	250420_NupNup_TR86.3.4_FL_1_MMStack_Pos24cell6age1	250420_NupNup_TR86.3.4_FL_1_MMStack_Pos24cell7age2
										Nup170_young	protein	Nup170-GFP	Nup170-GFP	Nup170-GFP	Nup170-GFP	Nup170-GFP	Nup170-GFP	Nup170-GFP	Nup170-GFP	Nup170-GFP	Nup170-GFP	Nup170-GFP	Nup170-GFP	Nup170-GFP	Nup170-GFP
					n	14				Nup170_young	visible cluster	0	0	0	0	0	0	0	0	0	0	0	0	0	0
						SEM	median	avg		Nup170_young	Cell	1	2	1	2	4	4	1	3	5	5	2	5	6	7
							1	1.35714		Nup170_young	Age	1	1	2	2	2	2	1	1	1	1	1	1	1	2
						0.0346491	0.769034	0.786327		Nup170_young	correlation	0.979185	0.938643	0.934287	0.807753	0.804441	0.55721	0.719451	0.73448	0.78871	0.715434	0.749358	0.971378	0.663443	0.644799
										Nup170_young	GFP	6734.13	7908.81	5188.47	5546.24	5702.71	4841.85	6714.63	6317.63	6507.85	5973.56	6265.13	5092.16	4884.2	6640.62
										Nup170_young	stdev	1251.21	1001.67	667.051	518.225	681.285	460.706	812.66	470.073	497.063	517.807	444.34	903.173	521.824	807.844
										Nup170_young	mCh	7224.12	8471.91	6746.66	6393.05	6774.35	6356.23	7361.68	7529.34	7605.34	7215.47	8154.97	6610.9	6419.24	7229.48
										Nup170_young	stdev	2600.8	2034.67	951.044	776.638	844.622	870.428	1255.68	675.971	906.514	660.946	812.888	1436.09	721.029	814.507
					strain	Nup170_old				Nup170_aged	File	250420_NupNup_TR86.3.4_FL_1_MMStack_Pos21cell1age18	250420_NupNup_TR86.3.4_FL_1_MMStack_Pos22cell1age18	250420_NupNup_TR86.3.4_FL_1_MMStack_Pos22cell2age17	250420_NupNup_TR86.3.4_FL_1_MMStack_Pos22cell4age6	250420_NupNup_TR86.3.4_FL_1_MMStack_Pos23cell1age16	250420_NupNup_TR86.3.4_FL_1_MMStack_Pos24cell1age21	250420_NupNup_TR86.3.4_FL_1_MMStack_Pos24cell2age14	250420_NupNup_TR86.3.4_FL_1_MMStack_Pos24cell3age14	250420_NupNup_TR86.3.4_FL_1_MMStack_Pos25cell1age15	250420_NupNup_TR86.3.4_FL_1_MMStack_Pos25cell2age15	250420_NupNup_TR86.3.4_FL_1_MMStack_Pos25cell7age8	250420_NupNup_TR86.3.4_FL_1_MMStack_Pos25cell8age19	250420_NupNup_TR86.3.4_FL_1_MMStack_Pos26cell2age18	250420_NupNup_TR86.3.4_FL_1_MMStack_Pos26cell5age11	250420_NupNup_TR86.3.4_FL_1_MMStack_Pos26cell6age19	250420_NupNup_TR86.3.4_FL_1_MMStack_Pos26cell7age11
										Nup170_aged	protein	Nup170-GFP	Nup170-GFP	Nup170-GFP	Nup170-GFP	Nup170-GFP	Nup170-GFP	Nup170-GFP	Nup170-GFP	Nup170-GFP	Nup170-GFP	Nup170-GFP	Nup170-GFP	Nup170-GFP	Nup170-GFP	Nup170-GFP	Nup170-GFP	Nup170-GFP
					n	17				Nup170_aged	cluster					0	0	1	1	1	0	0	0	1	1	0	0	0
						SEM	median	avg		Nup170_aged	Cell	1	1	2	4	1	1	2	3	1	2	7	8	1	5	6	7	1
					age		16	15.5294		Nup170_aged	Age	18	18	17	6	16	21	14	14	15	15	8	19	18	11	19	11	24
					correlation	0.0257693	0.844199	0.82292		Nup170_aged	correlation	0.897303	0.981045	0.83469	0.725226	0.913841	0.932175	0.891612	0.891612	0.613179	0.791276	0.844199	0.761912	0.916429	0.787162	0.863342	0.624479	0.72015
										Nup170_aged	GFP	6725.87	6054.97	4714.36	4703.18	6960.28	5021.37	5182.25	5182.25	5955.78	5115.97	7383.16	5924.39	7443.16	7788.26	6322.46	7617.37	8510.94
										Nup170_aged	stdev	1886.58	1702.07	495.332	574.576	896.472	795.488	692.655	692.655	603.892	663.055	930.157	525.435	762.252	742.389	654.388	714.224	712.298
										Nup170_aged	mCh	9209.08	6620.62	6426.57	7365.95	7614.91	6165.33	7316.82	7316.82	7580.96	6309.86	12850.1	6803.61	7754.14	8779.91	7503.14	9394.15	14472.6
										Nup170_aged	stdev	2921.44	2264.6	1099.43	991.011	1375.47	1276.43	1570.76	1570.76	1136.17	1064.83	2395.83	1108.77	1549.69	1102.62	1237.26	1030.02	1056.83
					strain	Mlp1_young				Mlp1_young	File	250503_NupNup_TR86.3.1_4.1_Fl__1_MMStack_Pos21cell1age1	250503_NupNup_TR86.3.1_4.1_Fl__1_MMStack_Pos21cell2age2	250503_NupNup_TR86.3.1_4.1_Fl__1_MMStack_Pos22cell2age2	250503_NupNup_TR86.3.1_4.1_Fl__1_MMStack_Pos23cell1age2	250503_NupNup_TR86.3.1_4.1_Fl__1_MMStack_Pos23cell3age1	250503_NupNup_TR86.3.1_4.1_Fl__1_MMStack_Pos23cell4age1	250503_NupNup_TR86.3.1_4.1_Fl__1_MMStack_Pos23cell5age2	250503_NupNup_TR86.3.1_4.1_Fl__1_MMStack_Pos24cell1age1	250503_NupNup_TR86.3.1_4.1_Fl__1_MMStack_Pos25cell1age0	250503_NupNup_TR86.3.1_4.1_Fl__1_MMStack_Pos25cell4age1	250503_NupNup_TR86.3.1_4.1_Fl__1_MMStack_Pos25cell7age1	250503_NupNup_TR86.3.1_4.1_Fl__1_MMStack_Pos25cell9age1	250503_NupNup_TR86.3.1_4.1_Fl__1_MMStack_Pos28cell1age2	250503_NupNup_TR86.3.1_4.1_Fl__1_MMStack_Pos28cell2age1	250503_NupNup_TR86.3.1_4.1_Fl__1_MMStack_Pos28cell3age2	250503_NupNup_TR86.3.1_4.1_Fl__1_MMStack_Pos28cell7age2	250503_NupNup_TR86.3.1_4.1_Fl__1_MMStack_Pos28cell8age1	250503_NupNup_TR86.3.1_4.1_Fl__1_MMStack_Pos28cell9age3	250503_NupNup_TR86.3.1_4.1_Fl__1_MMStack_Pos28cell10age0
										Mlp1_young	protein	Mlp1-GFP	Mlp1-GFP	Mlp1-GFP	Mlp1-GFP	Mlp1-GFP	Mlp1-GFP	Mlp1-GFP	Mlp1-GFP	Mlp1-GFP	Mlp1-GFP	Mlp1-GFP	Mlp1-GFP	Mlp1-GFP	Mlp1-GFP	Mlp1-GFP	Mlp1-GFP	Mlp1-GFP	Mlp1-GFP	Mlp1-GFP
					n	19				Mlp1_young	Cell	1	2	2	1	3	4	5	1	1	4	7	9	1	2	3	7	8	9	10
						SEM	median	avg		Mlp1_young	cluster	0	0	0	0	0	0	0	0	0	0	0	0	0	0	0	0	0	0	0
					age		1	1.52632		Mlp1_young	Age	1	2	2	2	1	1	2	1	0	1	1	1	2	1	2	2	1	3	3
					correlation	0.0411174	0.645887	0.621171		Mlp1_young	correlation	0.881658	0.490247	0.712322	0.336169	0.77764	0.891409	0.498129	0.528547	0.48443	0.28046	0.558321	0.80333	0.793344	0.55968	0.682693	0.645887	0.411665	0.689968	0.776351
										Mlp1_young	GFP	5750.51	5572.6	5400.95	5916.07	6335.53	6063.84	5958.44	6788.1	6311.33	6592.85	6565.75	6257.45	5913.89	5478.08	6509.71	5294.78	5532.1	4544.68	5830.19
										Mlp1_young	stdev	785.249	841.77	742.295	708.43	1096.9	785.742	642.517	1173.04	731.838	750.514	778.931	1111.26	846.856	721.743	707.685	686.135	908.036	712.146	1029.63
										Mlp1_young	mCh	5844.8	7451.73	7049.67	6518.67	8299.18	7235.61	7821.17	8016.43	7981.2	7555.15	7747.37	8446.37	8633.29	7126.78	7178.64	6446.72	7602.56	5837.48	7254.36
										Mlp1_young	stdev	662.264	891.891	628.829	724.412	902.433	1022.55	581.42	901.838	761.567	503.686	727.393	1122.76	1329.8	633.789	1009.22	1000.88	841.531	649.708	839.696
					strain	Mlp1_young				Mlp1_aged	File	250503_NupNup_TR86.3.1_4.1_Fl__1_MMStack_Pos21cell1age16	250503_NupNup_TR86.3.1_4.1_Fl__1_MMStack_Pos21cell3age15	250503_NupNup_TR86.3.1_4.1_Fl__1_MMStack_Pos21cell5age12	250503_NupNup_TR86.3.1_4.1_Fl__1_MMStack_Pos22cell1age12	250503_NupNup_TR86.3.1_4.1_Fl__1_MMStack_Pos23cell1age17	250503_NupNup_TR86.3.1_4.1_Fl__1_MMStack_Pos23cell2age19	250503_NupNup_TR86.3.1_4.1_Fl__1_MMStack_Pos24cell2age12		250503_NupNup_TR86.3.1_4.1_Fl__1_MMStack_Pos24cell4age9	250503_NupNup_TR86.3.1_4.1_Fl__1_MMStack_Pos24cell5age13	250503_NupNup_TR86.3.1_4.1_Fl__1_MMStack_Pos25cell1age14	250503_NupNup_TR86.3.1_4.1_Fl__1_MMStack_Pos25cell2age20	250503_NupNup_TR86.3.1_4.1_Fl__1_MMStack_Pos26cell1age18	250503_NupNup_TR86.3.1_4.1_Fl__1_MMStack_Pos27cell2age14	250503_NupNup_TR86.3.1_4.1_Fl__1_MMStack_Pos27cell3age15	250503_NupNup_TR86.3.1_4.1_Fl__1_MMStack_Pos28cell3age18	250503_NupNup_TR86.3.1_4.1_Fl__1_MMStack_Pos28cell4age14	250503_NupNup_TR86.3.1_4.1_Fl__1_MMStack_Pos29cell3age14	250503_NupNup_TR86.3.1_4.1_Fl__1_MMStack_Pos29cell5age16	250503_NupNup_TR86.3.1_4.1_Fl__1_MMStack_Pos29cell7age13	250503_NupNup_TR86.3.1_4.1_Fl__1_MMStack_Pos29cell9age6	250503_NupNup_TR86.3.1_4.1_Fl__1_MMStack_Pos30cell1age14	250503_NupNup_TR86.3.1_4.1_Fl__1_MMStack_Pos30cell2age16
										Mlp1_aged	protein	Mlp1-GFP	Mlp1-GFP	Mlp1-GFP	Mlp1-GFP	Mlp1-GFP	Mlp1-GFP	Mlp1-GFP	Mlp1-GFP	Mlp1-GFP	Mlp1-GFP	Mlp1-GFP	Mlp1-GFP	Mlp1-GFP	Mlp1-GFP	Mlp1-GFP	Mlp1-GFP	Mlp1-GFP	Mlp1-GFP	Mlp1-GFP	Mlp1-GFP	Mlp1-GFP	Mlp1-GFP	Mlp1-GFP
					n	23				Mlp1_aged	cluster	1	1	1	0	1	1	1	1	1	1	1	0	1	1	1	1	1	1	1	1	1	1	1
						SEM	median	avg		Mlp1_aged	Cell	1	3	5	1	1	2	2	2	4	5	1	2	1	2	3	3	4	3	5	7	9	1	2
					age		14	14.3043		Mlp1_aged	Age	16	15	12	12	17	19	12	12	9	13	14	20	18	14	15	18	14	14	16	13	6	14	16
					correlation	0.0612845	0.427693	0.361054		Mlp1_aged	correlation	-0.0856497	0.46025	0.351501	0.49918	0.544123	0.377134	0.419538	-0.521249	0.235601	0.190829	0.427693	0.913309	0.209225	0.428357	0.558612	-0.126925	0.524639	0.322035	0.541164	0.585341	0.602639	0.523878	0.323018
										Mlp1_aged	GFP	5513.08	6005.34	6805.13	6021.56	4813.44	4548.34	4550.68	4988.55	4177.36	4087.13	5906.68	5478.44	5431.56	6294.19	3797.64	4784.63	4259.76	4874.44	6568.27	4520.19	5594.65	4224.79	6127.91
										Mlp1_aged	stdev	946.278	1372.74	985.106	1191.17	995.732	788.644	406.499	536.449	633.811	550.558	1054.55	1700.95	881.158	992.866	601.874	739.062	414.196	525.046	1929.87	754.462	937.766	788.272	1214.14
										Mlp1_aged	mCh	7617	9620.22	10907.9	9628.89	7487.48	6926.71	5553.8	6875.72	5588.96	5612.7	8541.21	8071.23	7956.08	10156.6	5994.07	7051.6	6777.3	8088.98	9474.36	7869.75	9171.5	6259.3	10253.7
										Mlp1_aged	stdev	2240.31	1361.69	1259.82	931.19	1207.05	992.875	565.216	1836.87	520.671	417.842	1056.64	1299.55	1150.51	1120.91	778.495	676.436	718.051	1717.86	887.583	1316.78	1357.99	1510.9	1153.93
reference											File	181101_Run8_Nu170_Mlp1_refNup159__1_MMStack_Pos3cell3age2	181101_Run8_Nu170_Mlp1_refNup159__1_MMStack_Pos3cell4age3	181101_Run8_Nu170_Mlp1_refNup159__1_MMStack_Pos3cell5age2	181101_Run8_Nu170_Mlp1_refNup159__1_MMStack_Pos3cell6age3	181101_Run8_Nu170_Mlp1_refNup159__1_MMStack_Pos3cell7age2	181101_Run8_Nu170_Mlp1_refNup159__1_MMStack_Pos3cell8age0	181101_Run8_Nu170_Mlp1_refNup159__1_MMStack_Pos3cell9age2	181101_Run8_Nu170_Mlp1_refNup159_FL__1_MMStack_Pos4cell2age0	181101_Run8_Nu170_Mlp1_refNup159_FL__1_MMStack_Pos4cell4age1	181101_Run8_Nu170_Mlp1_refNup159_FL__1_MMStack_Pos4cell5age3	181101_Run8_Nu170_Mlp1_refNup159_FL__1_MMStack_Pos4cell6age2	181101_Run8_Nu170_Mlp1_refNup159_FL__1_MMStack_Pos4cell8age2	181101_Run8_Nu170_Mlp1_refNup159_FL__1_MMStack_Pos4cell10age4	181101_Run8_Nu170_Mlp1_refNup159_FL__1_MMStack_Pos4cell11age2	181101_Run8_Nu170_Mlp1_refNup159_FL__1_MMStack_Pos4cell12age0	181101_Run8_Nu170_Mlp1_refNup159_FL__1_MMStack_Pos4cell14age2	181101_Run8_Nu170_Mlp1_refNup159__1_MMStack_Pos5cell2ageNaN	181101_Run8_Nu170_Mlp1_refNup159_FL__1_MMStack_Pos6cell1age1	181101_Run8_Nu170_Mlp1_refNup159_FL__1_MMStack_Pos6cell2age1	181101_Run8_Nu170_Mlp1_refNup159_FL__1_MMStack_Pos6cell3age2	181101_Run8_Nu170_Mlp1_refNup159_FL__1_MMStack_Pos6cell4age1	181101_Run8_Nu170_Mlp1_refNup159_FL__1_MMStack_Pos7cell1age2	181101_Run8_Nu170_Mlp1_refNup159_FL__1_MMStack_Pos7cell2age0	181101_Run8_Nu170_Mlp1_refNup159_FL__1_MMStack_Pos7cell3age3	181101_Run8_Nu170_Mlp1_refNup159_FL__1_MMStack_Pos7cell4age3	181101_Run8_Nu170_Mlp1_refNup159_FL__1_MMStack_Pos7cell5age0	181101_Run8_Nu170_Mlp1_refNup159_FL__1_MMStack_Pos7cell7age1	181101_Run8_Nu170_Mlp1_refNup159_FL__1_MMStack_Pos7cell8age3	181101_Run8_Nu170_Mlp1_refNup159_FL__1_MMStack_Pos8cell2age3	181101_Run8_Nu170_Mlp1_refNup159_FL__1_MMStack_Pos9cell1age3	181101_Run8_Nu170_Mlp1_refNup159_FL__1_MMStack_Pos10cell2age1	181101_Run8_Nu170_Mlp1_refNup159_FL__1_MMStack_Pos10cell3age3	181101_Run8_Nu170_Mlp1_refNup159_FL__1_MMStack_Pos10cell4age1
Nup159-mCh							strain	Nup170-Young		Nup170-Young	protein	Nup170	Nup170	Nup170	Nup170	Nup170	Nup170	Nup170	Nup170	Nup170	Nup170	Nup170	Nup170	Nup170	Nup170	Nup170	Nup170	Nup170	Nup170	Nup170	Nup170	Nup170	Nup170	Nup170	Nup170	Nup170	Nup170	Nup170	Nup170	Nup170	Nup170	Nup170	Nup170	Nup170
							n	33		Nup170-Young		0	0	0	0	0	0	0	0	0	0	0	0	0	0	0	0	0	0	0	0	0	0	0	0	0	0	0	0	0	0	0	0	0
										Nup170-Young	Cells	3	4	5	6	7	8	9	2	4	5	6	8	10	11	12	14	2	1	2	3	4	1	2	3	4	5	7	8	2	1	2	3	4
							age	2		Nup170-Young	Age	2	3	2	3	2	0	2	0	1	3	2	2	4	2	0	2	1	1	1	1	1	2	0	3	3	0	1	3	3	3	1	3	1
							avg	median		Nup170-Young	correlation	0.806988	0.825492	0.82618	0.881511	0.814057	0.477042	0.777625	0.914962	0.853496	0.742461	0.738716	0.829025	0.870506	0.627485	0.826984	0.83038	0.80919	0.622061	0.469762	0.628131	0.929629	0.813212	0.86608	0.849279	0.807082	0.844825	0.894983	0.764019	0.712389	0.73062	0.904282	0.789342	0.841351
						correlation	0.785429	0.814057		Nup170-Young	GFP	20878.7	21933.5	19916.8	20455.6	18730.4	20069.1	20542.4	20647.1	20825.5	19876.4	19466.7	20399.9	20597.8	20525.5	20249.6	20260.6	20397.1	20285.1	22211.3	18958.5	20685.7	18959.4	21145.9	18062.2	19437	18370.1	20551	19406.7	19907.4	17150.5	19642	18375.4	18742.5
										Nup170-Young	stdev	582.233	629.02	605.399	614.465	683.295	381.985	621.485	712.195	714.549	645.456	758.271	688.338	698.451	741.591	787.389	851.602	573.71	828.666	484.084	591.019	974.9	563.341	617.504	478.01	826.312	754.311	1037.82	689.337	743.96	510.495	544.236	606.108	855.668
										Nup170-Young	mCh	12282.5	13441.2	11387.8	12344.4	12258.8	11706.4	12220.3	11970.2	12151.2	11779.6	11207.4	11678.3	11561.1	12190	12074.5	12080.4	12294.8	12180.1	13313.8	10998.5	12598.9	11101.8	13550.8	10764.3	11567.7	10445.9	12132.1	11127.6	12471.6	10785.3	11889.6	11638.9	11657.5
										Nup170-Young	stdev	591.286	762.146	589.779	1009.84	854.092	785.042	734.755	864.033	739.543	948.213	621.741	649.737	795.991	618.949	655.028	822.09	584.323	550.629	743.707	888.619	1164.12	890.133	712.281	721.763	870.023	629.246	1107.64	842.3	1451.3	627.445	1011.06	748.588	761.103
											File	181101_Run8_Nu170_Mlp1_refNup159__1_MMStack_Pos3cell1age17	181101_Run8_Nu170_Mlp1_refNup159__1_MMStack_Pos3cell2age20	181101_Run8_Nu170_Mlp1_refNup159__1_MMStack_Pos3cell3age16	181101_Run8_Nu170_Mlp1_refNup159__1_MMStack_Pos3cell5age22	181101_Run8_Nu170_Mlp1_refNup159__1_MMStack_Pos3cell6age21	181101_Run8_Nu170_Mlp1_refNup159__1_MMStack_Pos3cell7age21	181101_Run8_Nu170_Mlp1_refNup159__1_MMStack_Pos4cell1age21	181101_Run8_Nu170_Mlp1_refNup159__1_MMStack_Pos4cell3age25	181101_Run8_Nu170_Mlp1_refNup159__1_MMStack_Pos4cell4age22	181101_Run8_Nu170_Mlp1_refNup159__1_MMStack_Pos4cell6age26	181101_Run8_Nu170_Mlp1_refNup159__1_MMStack_Pos4cell7age24	181101_Run8_Nu170_Mlp1_refNup159__1_MMStack_Pos4cell8age23	181101_Run8_Nu170_Mlp1_refNup159__1_MMStack_Pos4cell10age25	181101_Run8_Nu170_Mlp1_refNup159__1_MMStack_Pos4cell11age24	181101_Run8_Nu170_Mlp1_refNup159__1_MMStack_Pos5cell1age18	181101_Run8_Nu170_Mlp1_refNup159__1_MMStack_Pos5cell2age25	181101_Run8_Nu170_Mlp1_refNup159__1_MMStack_Pos5cell3age16	181101_Run8_Nu170_Mlp1_refNup159__1_MMStack_Pos5cell4age21	181101_Run8_Nu170_Mlp1_refNup159__1_MMStack_Pos7cell1age17	181101_Run8_Nu170_Mlp1_refNup159__1_MMStack_Pos7cell2age19	181101_Run8_Nu170_Mlp1_refNup159__1_MMStack_Pos7cell3age24	181101_Run8_Nu170_Mlp1_refNup159__1_MMStack_Pos7cell4age15	181101_Run8_Nu170_Mlp1_refNup159__1_MMStack_Pos7cell5age20	181101_Run8_Nu170_Mlp1_refNup159__1_MMStack_Pos8cell2age18	181101_Run8_Nu170_Mlp1_refNup159__1_MMStack_Pos8cell3age20	181101_Run8_Nu170_Mlp1_refNup159__1_MMStack_Pos9cell1age24	181101_Run8_Nu170_Mlp1_refNup159__1_MMStack_Pos9cell2age22	181101_Run8_Nu170_Mlp1_refNup159__1_MMStack_Pos9cell3age21	181101_Run8_Nu170_Mlp1_refNup159__1_MMStack_Pos9cell6age14	181101_Run8_Nu170_Mlp1_refNup159__1_MMStack_Pos9cell7age17
							strain	Nup170-Aged		Nup170-Aged	protein	Nup170	Nup170	Nup170	Nup170	Nup170	Nup170	Nup170	Nup170	Nup170	Nup170	Nup170	Nup170	Nup170	Nup170	Nup170	Nup170	Nup170	Nup170	Nup170	Nup170	Nup170	Nup170	Nup170	Nup170	Nup170	Nup170	Nup170	Nup170	Nup170	Nup170
							n	30		Nup170-Aged		1	1	1	1	0	0	1	0	1	1	0	1	1	1	1	0	0	0	1	1	1	1	1	1	1	0	0	0	1	1
										Nup170-Aged	Cells	1	2	3	5	6	7	1	3	4	6	7	8	10	11	1	2	3	4	1	2	3	4	5	2	3	1	2	3	6	7
							age	21		Nup170-Aged	Age	17	20	16	22	21	21	21	25	22	26	24	23	25	24	18	25	16	21	17	19	24	15	20	18	20	24	22	21	14	17
							avg	median		Nup170-Aged	correlation	0.94504	0.965839	0.822345	0.519869	0.693971	0.533653	0.805968	0.76389	0.802626	0.926403	0.786476	0.718295	0.82719	0.843287	0.894316	0.414691	0.916317	0.394606	0.912269	0.961675	0.809054	0.854958	0.90169	0.889745	0.807516	0.708283	0.92453	0.87993	0.480732	0.842714
						correlation	0.784929	0.824768		Nup170-Aged	GFP	21172.6	22552.2	21199.4	20096.4	20635.3	20581.8	19759.3	17905.7	17327	18954.5	18476.9	17734.6	20166.4	22622.1	19638.3	18209	18436.6	17855.8	21799.8	21457.6	17451.9	22248.6	21946.9	22948.2	18517.6	17903.7	18840	18427.3	21558.4	18612.7
										Nup170-Aged	stdev	2602.77	4898.07	736.968	721.921	915.883	896.768	739.071	647.563	481.733	670.681	888.31	628.27	995.906	681.069	1865.35	740.342	984.75	561.264	3296.55	2535.85	497.435	1259.7	1458	1825.08	811.68	783.931	1214.75	690.697	1082.79	2113.22
										Nup170-Aged	mCh	14984.1	15593.6	15649.8	15187.5	14716.1	15124.8	15317.7	12112	11853.2	12589.8	11934.9	12506.6	13326.5	16208.3	13182.6	12093.1	12962.2	12225	19763.1	17314.9	11872.2	14695	16292.2	18754.5	13271.4	12564.5	13459	12039.4	17143.5	14705.9
										Nup170-Aged	stdev	3460.28	4404.16	1611.73	3831.61	1698.98	1437.27	1290.09	625.918	971.719	1169.87	1111.26	874.572	1872.14	1173.31	2012.59	951.364	911.43	1229.62	5298.9	3914.89	1059.37	1610.75	2971.01	3732.94	1148.6	1125.61	2205.73	1269.7	1884.92	2770.7
											File	181108_Run9_Nu60_Mlp1_refNup159_BR__1_MMStack_Pos1cell1age1	181108_Run9_Nu60_Mlp1_refNup159_BR__1_MMStack_Pos1cell2age1	181108_Run9_Nu60_Mlp1_refNup159_FL__1_MMStack_Pos2cell1age2	181108_Run9_Nu60_Mlp1_refNup159_FL__1_MMStack_Pos2cell2age3	181108_Run9_Nu60_Mlp1_refNup159_FL__1_MMStack_Pos2cell3age3	181108_Run9_Nu60_Mlp1_refNup159_FL__1_MMStack_Pos2cell4age1	181108_Run9_Nu60_Mlp1_refNup159_FL__1_MMStack_Pos2cell6age3	181108_Run9_Nu60_Mlp1_refNup159_FL__1_MMStack_Pos2cell8age1	181108_Run9_Nu60_Mlp1_refNup159_FL__1_MMStack_Pos2cell9age2	181108_Run9_Nu60_Mlp1_refNup159_FL__1_MMStack_Pos3cell1age3	181108_Run9_Nu60_Mlp1_refNup159_FL__1_MMStack_Pos3cell2age2	181108_Run9_Nu60_Mlp1_refNup159_FL__1_MMStack_Pos3cell3age3	181108_Run9_Nu60_Mlp1_refNup159_FL__1_MMStack_Pos3cell4age2	181108_Run9_Nu60_Mlp1_refNup159_FL__1_MMStack_Pos3cell5age3	181108_Run9_Nu60_Mlp1_refNup159_FL__1_MMStack_Pos3cell8age1	181108_Run9_Nu60_Mlp1_refNup159_FL__1_MMStack_Pos3cell9age2	181108_Run9_Nu60_Mlp1_refNup159_FL__1_MMStack_Pos3cell10age0	181108_Run9_Nu60_Mlp1_refNup159_FL__1_MMStack_Pos3cell11age2	181108_Run9_Nu60_Mlp1_refNup159_FL__1_MMStack_Pos4cell1age2	181108_Run9_Nu60_Mlp1_refNup159_FL__1_MMStack_Pos4cell2age2	181108_Run9_Nu60_Mlp1_refNup159_FL__1_MMStack_Pos4cell4age2	181108_Run9_Nu60_Mlp1_refNup159_FL__1_MMStack_Pos4cell5age2	181108_Run9_Nu60_Mlp1_refNup159_FL__1_MMStack_Pos4cell6age1	181108_Run9_Nu60_Mlp1_refNup159_FL__1_MMStack_Pos4cell7age1	181108_Run9_Nu60_Mlp1_refNup159_FL__1_MMStack_Pos4cell8age2	181108_Run9_Nu60_Mlp1_refNup159_FL__1_MMStack_Pos4cell9age0	181108_Run9_Nu60_Mlp1_refNup159_FL__1_MMStack_Pos4cell10age1	181108_Run9_Nu60_Mlp1_refNup159_FL__1_MMStack_Pos5cell1age2	181108_Run9_Nu60_Mlp1_refNup159_FL__1_MMStack_Pos5cell2age2	181108_Run9_Nu60_Mlp1_refNup159_FL__1_MMStack_Pos5cell3age2	181108_Run9_Nu60_Mlp1_refNup159_FL__1_MMStack_Pos5cell4age1	181108_Run9_Nu60_Mlp1_refNup159_FL__1_MMStack_Pos5cell7age2
							strain	Nup60-Young		Nup60-Young	protein	Nup60	Nup60	Nup60	Nup60	Nup60	Nup60	Nup60	Nup60	Nup60	Nup60	Nup60	Nup60	Nup60	Nup60	Nup60	Nup60	Nup60	Nup60	Nup60	Nup60	Nup60	Nup60	Nup60	Nup60	Nup60	Nup60	Nup60	Nup60	Nup60	Nup60	Nup60	Nup60
							n	32		Nup60-Young		0	0	0	0	0	0	0	0	0	0	0	0	0	0	0	0	0	0	0	0	0	0	0	0	0	0	0	0	0	0	0	0
										Nup60-Young	Cells	1	2	1	2	3	4	6	8	9	1	2	3	4	5	8	9	10	11	1	2	4	5	6	7	8	9	10	1	2	3	4	7
							age	2		Nup60-Young	Age	1	1	2	3	3	1	3	1	2	3	2	3	2	3	1	2	0	2	2	2	2	2	1	1	2	0	1	2	2	2	1	2
							avg	median		Nup60-Young	correlation	0.634669	0.40103	0.614701	0.911344	0.923913	0.948299	0.873573	0.815061	0.810267	0.479076	0.835046	0.840514	0.350489	0.383676	0.257116	0.878771	0.309841	0.898141	0.404579	0.709493	0.719058	0.457053	0.703492	0.698928	0.420446	0.758856	0.496131	0.791103	0.833513	0.872214	0.747123	0.862767
						correlation	0.676259	0.73309		Nup60-Young	GFP	7255.35	7278.62	7464.34	7752.14	7750.48	5953.17	7103.18	8064.38	6013.62	6672.44	6169.52	5535.98	6364.94	5847.07	6202.86	6498.61	5913.91	7122.45	6172.31	6455.93	6501.88	7210.14	6803.25	5870.37	6440.44	6334.04	5897.32	6730.16	6537.98	6445.93	6789.48	6985.41
										Nup60-Young	stdev	1236.85	526.633	987.157	1083.81	1008.9	733.211	748.781	773.269	581.601	476.851	820.213	743.422	535.09	562.284	673.258	883.702	590.699	757.274	606.766	744.592	669.414	551.946	681.802	510.15	739.16	805.976	676.369	920.11	1057.44	1113.74	963.194	821.629
										Nup60-Young	mCh	7326.01	7856.68	8000.68	8219.53	7286.98	6164.74	6937.25	7532.91	6801.44	7208.63	6347.18	6162.29	7446.21	6716.06	7204.73	6916.62	7363.96	7628.96	6693.03	7650.88	6762.38	7428.21	7152.24	7143.4	7251.27	7258.29	6432.06	6988.32	6692.24	7220.61	7102.1	6994.81
										Nup60-Young	stdev	535.888	480.274	519.164	765.286	688.626	704.557	442.67	629.34	477.511	518.573	638.875	560.72	452.186	501.095	438.908	662.538	583.908	698.465	559.4	621.986	711.943	511.514	684.372	542.06	514.539	853.014	443.614	864.164	841.19	611.953	946.113	650.188
											File	181108_Run9_Nu60_Mlp1_refNup159_BR__1_MMStack_Pos3cell2age10	181108_Run9_Nu60_Mlp1_refNup159_BR__1_MMStack_Pos3cell3age17	181108_Run9_Nu60_Mlp1_refNup159_BR__1_MMStack_Pos3cell4age20	181108_Run9_Nu60_Mlp1_refNup159_BR__1_MMStack_Pos3cell5age13	181108_Run9_Nu60_Mlp1_refNup159_BR__1_MMStack_Pos3cell6age24	181108_Run9_Nu60_Mlp1_refNup159_BR__1_MMStack_Pos3cell7age24	181108_Run9_Nu60_Mlp1_refNup159_FL__1_MMStack_Pos4cell1age22	181108_Run9_Nu60_Mlp1_refNup159_FL__1_MMStack_Pos4cell2age23	181108_Run9_Nu60_Mlp1_refNup159_FL__1_MMStack_Pos4cell3age15	181108_Run9_Nu60_Mlp1_refNup159_FL__1_MMStack_Pos4cell4age16	181108_Run9_Nu60_Mlp1_refNup159_FL__1_MMStack_Pos4cell5age20	181108_Run9_Nu60_Mlp1_refNup159_FL__1_MMStack_Pos5cell2age22	181108_Run9_Nu60_Mlp1_refNup159_FL__1_MMStack_Pos5cell3age23	181108_Run9_Nu60_Mlp1_refNup159_FL__1_MMStack_Pos5cell4age24	181108_Run9_Nu60_Mlp1_refNup159_BR__1_MMStack_Pos7cell1age22	181108_Run9_Nu60_Mlp1_refNup159_BR__1_MMStack_Pos7cell2age23	181108_Run9_Nu60_Mlp1_refNup159_BR__1_MMStack_Pos7cell4age25	181108_Run9_Nu60_Mlp1_refNup159_BR__1_MMStack_Pos7cell5age21	181108_Run9_Nu60_Mlp1_refNup159_BR__1_MMStack_Pos7cell6age22	181108_Run9_Nu60_Mlp1_refNup159_FL__1_MMStack_Pos8cell1age25	181108_Run9_Nu60_Mlp1_refNup159_FL__1_MMStack_Pos8cell2age20	181108_Run9_Nu60_Mlp1_refNup159_FL__1_MMStack_Pos8cell3age24	181108_Run9_Nu60_Mlp1_refNup159_FL__1_MMStack_Pos8cell4age14	181108_Run9_Nu60_Mlp1_refNup159_FL__1_MMStack_Pos8cell5age24	181108_Run9_Nu60_Mlp1_refNup159_BR__1_MMStack_Pos9cell1age23	181108_Run9_Nu60_Mlp1_refNup159_BR__1_MMStack_Pos9cell2age14	181108_Run9_Nu60_Mlp1_refNup159_BR__1_MMStack_Pos9cell3age19	181108_Run9_Nu60_Mlp1_refNup159_BR__1_MMStack_Pos9cell4age22	181108_Run9_Nu60_Mlp1_refNup159_BR__1_MMStack_Pos10cell1age11	181108_Run9_Nu60_Mlp1_refNup159_BR__1_MMStack_Pos10cell3age18	181108_Run9_Nu60_Mlp1_refNup159_BR__1_MMStack_Pos10cell5age13	181108_Run9_Nu60_Mlp1_refNup159_BR__1_MMStack_Pos10cell6age21	181108_Run9_Nu60_Mlp1_refNup159_BR__1_MMStack_Pos10cell8age11
							strain	Nup60-Aged		Nup60-Aged	protein	Nup60	Nup60	Nup60	Nup60	Nup60	Nup60	Nup60	Nup60	Nup60	Nup60	Nup60	Nup60	Nup60	Nup60	Nup60	Nup60	Nup60	Nup60	Nup60	Nup60	Nup60	Nup60	Nup60	Nup60	Nup60	Nup60	Nup60	Nup60	Nup60	Nup60	Nup60	Nup60	Nup60
							n	33		Nup60-Aged		0	0	0	0	0	0	0	0	0	0	0	1	1	1	1	1	1	1	1	1	1	1	1	1	1	1	1	1	1	1	2	3	3
										Nup60-Aged	Cells	2	3	4	5	6	7	1	2	3	4	5	2	3	4	1	2	4	5	6	1	2	3	4	5	1	2	3	4	1	3	5	6	8
							age	21		Nup60-Aged	Age	10	17	20	13	24	24	22	23	15	16	20	22	23	24	22	23	25	21	22	25	20	24	14	24	23	14	19	22	11	18	13	21	11
							avg	median		Nup60-Aged	correlation	0.250042	0.173475	0.893128	-0.164207	0.904766	0.19313	0.647898	-0.109922	0.461462	0.740704	0.285113	0.518398	0.305756	0.272515	-0.0733041	-0.141569	-0.101462	0.600331	0.775677	0.337348	0.0241725	0.235594	0.383122	0.10882	0.596001	0.552586	0.170161	0.604743	0.335385	0.437184	0.721248	-0.0105027	0.601779
						correlation	0.349381	0.335385		Nup60-Aged	GFP	6228.7	6255.79	6233.98	6370.75	5889.76	6980.87	5765.29	6422.36	6568.05	5035.9	5740.77	5849.94	5220.16	5747.95	6104.23	6113.77	6594.06	5238.79	5659.89	7276.94	5262.52	5365.65	6457.52	5564.25	5533.99	5298.72	5761.68	5474.03	5606.7	4840.68	5873.8	6184.54	5412.78
										Nup60-Aged	stdev	774.373	559.075	1011.03	466.802	890.927	886.597	527.072	806.771	802.168	544.736	621.874	895.991	413.436	695.481	846.553	831.455	670.876	439.07	796.64	581.783	551.504	652.546	927.764	558.537	709.12	521.849	517.585	490.752	288.589	410.775	435.185	1039.05	1303.97
										Nup60-Aged	mCh	10438.2	8767.24	9224.83	8705.82	7535.13	8499.57	8537.04	9315.52	9884.65	7069.04	9826.77	8294.4	8233.16	8587.07	9481.43	9216.32	8081.7	8258.32	8467.54	8487.4	8917.51	6955.9	8247.26	7240.99	6485.01	7035.89	9498.45	7010.66	8778.58	8694.15	8126.42	8200.09	10650
										Nup60-Aged	stdev	1702.09	892.616	1797.2	1970.8	1275.38	1237.14	963.445	774.105	1708.67	1731.01	1381.39	1526.56	1403.22	1826.23	1372.21	1763.02	1634.45	1776.68	2157.1	1009.49	1881.35	1064.18	932.465	1741.71	1032.18	1136.63	526.216	1033.71	1256.72	1223.59	1454.79	1149.07	4190.94
											File	181101_Run8_Nu170_Mlp1_refNup159_FL__1_MMStack_Pos22cell1age2	181101_Run8_Nu170_Mlp1_refNup159_FL__1_MMStack_Pos22cell3age3	181101_Run8_Nu170_Mlp1_refNup159_FL__1_MMStack_Pos22cell5age1	181101_Run8_Nu170_Mlp1_refNup159_FL__1_MMStack_Pos22cell6age1	181101_Run8_Nu170_Mlp1_refNup159_FL__1_MMStack_Pos22cell7age2	181101_Run8_Nu170_Mlp1_refNup159_FL__1_MMStack_Pos23cell1age1	181101_Run8_Nu170_Mlp1_refNup159_FL__1_MMStack_Pos23cell2age1	181101_Run8_Nu170_Mlp1_refNup159_FL__1_MMStack_Pos23cell4age1	181101_Run8_Nu170_Mlp1_refNup159__1_MMStack_Pos24cell3age2	181101_Run8_Nu170_Mlp1_refNup159__1_MMStack_Pos24cell4age1	181101_Run8_Nu170_Mlp1_refNup159__1_MMStack_Pos24cell5age1	181101_Run8_Nu170_Mlp1_refNup159__1_MMStack_Pos24cell6age1	181101_Run8_Nu170_Mlp1_refNup159__1_MMStack_Pos24cell8age0	181101_Run8_Nu170_Mlp1_refNup159__1_MMStack_Pos24cell9age1	181101_Run8_Nu170_Mlp1_refNup159__1_MMStack_Pos24cell10age1	181101_Run8_Nu170_Mlp1_refNup159_FL__1_MMStack_Pos28cell1age0	181101_Run8_Nu170_Mlp1_refNup159_FL__1_MMStack_Pos28cell3age1	181101_Run8_Nu170_Mlp1_refNup159_FL__1_MMStack_Pos28cell5age1	181101_Run8_Nu170_Mlp1_refNup159_FL__1_MMStack_Pos28cell6age0	181101_Run8_Nu170_Mlp1_refNup159_FL__1_MMStack_Pos29cell1age2	181101_Run8_Nu170_Mlp1_refNup159_FL__1_MMStack_Pos29cell2age2	181101_Run8_Nu170_Mlp1_refNup159_FL__1_MMStack_Pos29cell3age2	181101_Run8_Nu170_Mlp1_refNup159_FL__1_MMStack_Pos29cell4age2	181101_Run8_Nu170_Mlp1_refNup159_FL__1_MMStack_Pos29cell5age1	181101_Run8_Nu170_Mlp1_refNup159_FL__1_MMStack_Pos29cell6age0	181101_Run8_Nu170_Mlp1_refNup159_FL__1_MMStack_Pos29cell7age2	181101_Run8_Nu170_Mlp1_refNup159_FL__1_MMStack_Pos29cell8age2	181101_Run8_Nu170_Mlp1_refNup159_FL__1_MMStack_Pos29cell9age2	181101_Run8_Nu170_Mlp1_refNup159_FL__1_MMStack_Pos29cell11age1	181101_Run8_Nu170_Mlp1_refNup159_FL__1_MMStack_Pos29cell10age1	181101_Run8_Nu170_Mlp1_refNup159_FL__1_MMStack_Pos29cell14age1
							strain	Mlp1-Young		Mlp1-Young	protein	Mlp1	Mlp1	Mlp1	Mlp1	Mlp1	Mlp1	Mlp1	Mlp1	Mlp1	Mlp1	Mlp1	Mlp1	Mlp1	Mlp1	Mlp1	Mlp1	Mlp1	Mlp1	Mlp1	Mlp1	Mlp1	Mlp1	Mlp1	Mlp1	Mlp1	Mlp1	Mlp1	Mlp1	Mlp1	Mlp1	Mlp1
							n	31		Mlp1-Young		0	0	0	0	0	0	0	0	0	0	0	0	0	0	0	0	0	0	0	0	0	0	0	0	0	0	0	0	0	0	0
										Mlp1-Young	Cells	1	3	5	6	7	1	2	4	3	4	5	6	8	9	0	1	3	5	6	1	2	3	4	5	6	7	8	9	1	0	4
							age	1		Mlp1-Young	Age	2	3	1	1	2	1	1	1	2	1	1	1	0	1	1	0	1	1	0	2	2	2	2	1	0	2	2	2	1	1	1
							avg	median		Mlp1-Young	correlation	0.701398	0.828577	0.360962	0.283808	0.799543	0.444014	0.621075	0.409253	0.879646	0.82905	0.846655	0.857974	0.401293	0.715287	0.411951	0.807459	0.525332	0.469178	0.347184	0.48428	0.61211	0.89752	0.516406	0.580293	0.385456	0.766671	0.763783	0.849734	0.685404	0.176907	0.72707
						correlation	0.612428	0.621075		Mlp1-Young	GFP	20062.5	20025.9	17852.6	20501.3	19446.6	17455.4	18095.2	18783.5	18333.8	18237.6	18037.3	17552.1	18059.8	18834.2	17425.1	17643.7	16683	19020.2	18412.1	18836.1	18064.1	17907.7	18529.1	18308.1	16656.4	17292	17671.4	18843.9	16062.8	18179.3	16898.2
										Mlp1-Young	stdev	665.098	1251.33	428.557	842.007	809.734	936.957	676.379	835.945	953.379	696.452	1237.08	1183.88	756.785	1166.25	1205.1	1019.65	558.904	759.062	675.035	1001.1	665.938	1297.6	1301.62	736.219	623.326	989.532	1257.61	1121.16	720.422	678.232	952.834
										Mlp1-Young	mCh	11785.3	11194.6	11169.8	11905.3	11520.9	10154.7	10947.6	11021.3	11421.8	11641.7	10431.5	10887.2	11378	10726.2	10396.2	11134.3	10064.1	10989.4	10285.2	10908	10756.3	10378.4	10845.1	10720.3	9339.48	9998.96	10796.1	11155	9514.6	10681.5	10123
										Mlp1-Young	stdev	947.544	1045.47	730.329	573.495	741.42	405.596	474.583	617.759	858.379	967.193	712.83	1145.32	691.9	829.84	563.209	1116.16	473.676	547.074	646.475	707.862	773.425	1228.63	913.49	588.3	355.652	679.256	874.495	757.632	783.83	487.766	547.541
											File	181101_Run8_Nu170_Mlp1_refNup159__1_MMStack_Pos22cell5age22	181101_Run8_Nu170_Mlp1_refNup159__1_MMStack_Pos22cell6age19	181101_Run8_Nu170_Mlp1_refNup159__1_MMStack_Pos22cell10age22	181101_Run8_Nu170_Mlp1_refNup159__1_MMStack_Pos22cell12age14	181101_Run8_Nu170_Mlp1_refNup159__1_MMStack_Pos22cell13age23	181101_Run8_Nu170_Mlp1_refNup159_FL__1_MMStack_Pos23cell1age20	181101_Run8_Nu170_Mlp1_refNup159_FL__1_MMStack_Pos23cell2age23	181101_Run8_Nu170_Mlp1_refNup159_FL__1_MMStack_Pos23cell4age24	181101_Run8_Nu170_Mlp1_refNup159_FL__1_MMStack_Pos23cell5age25	181101_Run8_Nu170_Mlp1_refNup159_FL__1_MMStack_Pos23cell6age22	181101_Run8_Nu170_Mlp1_refNup159_FL__1_MMStack_Pos23cell7age23	181101_Run8_Nu170_Mlp1_refNup159_FL__1_MMStack_Pos23cell9age25	181101_Run8_Nu170_Mlp1_refNup159_FL__1_MMStack_Pos23cell10age9	181101_Run8_Nu170_Mlp1_refNup159_FL__1_MMStack_Pos24cell1age19	181101_Run8_Nu170_Mlp1_refNup159_FL__1_MMStack_Pos24cell3age23	181101_Run8_Nu170_Mlp1_refNup159_FL__1_MMStack_Pos24cell4age20	181101_Run8_Nu170_Mlp1_refNup159_FL__1_MMStack_Pos24cell5age22	181101_Run8_Nu170_Mlp1_refNup159_FL__1_MMStack_Pos24cell6age13	181101_Run8_Nu170_Mlp1_refNup159_FL__1_MMStack_Pos24cell7age16	181101_Run8_Nu170_Mlp1_refNup159_FL__1_MMStack_Pos24cell8age20	181101_Run8_Nu170_Mlp1_refNup159_FL__1_MMStack_Pos24cell9age18	181101_Run8_Nu170_Mlp1_refNup159_FL__1_MMStack_Pos24cell10age21	181101_Run8_Nu170_Mlp1_refNup159_FL__1_MMStack_Pos24cell12age23	181101_Run8_Nu170_Mlp1_refNup159_FL__1_MMStack_Pos25cell1age17	181101_Run8_Nu170_Mlp1_refNup159_FL__1_MMStack_Pos25cell2age21	181101_Run8_Nu170_Mlp1_refNup159_FL__1_MMStack_Pos25cell3age16	181101_Run8_Nu170_Mlp1_refNup159_FL__1_MMStack_Pos25cell4age21	181101_Run8_Nu170_Mlp1_refNup159_FL__1_MMStack_Pos25cell5age23	181101_Run8_Nu170_Mlp1_refNup159_FL__1_MMStack_Pos26cell1age17	181101_Run8_Nu170_Mlp1_refNup159_FL__1_MMStack_Pos26cell2age19	181101_Run8_Nu170_Mlp1_refNup159_FL__1_MMStack_Pos26cell3age22	181101_Run8_Nu170_Mlp1_refNup159_FL__1_MMStack_Pos26cell5age18	181101_Run8_Nu170_Mlp1_refNup159_FL__1_MMStack_Pos26cell6age20	181101_Run8_Nu170_Mlp1_refNup159_FL__1_MMStack_Pos27cell1age21	181101_Run8_Nu170_Mlp1_refNup159_FL__1_MMStack_Pos27cell2age20	181101_Run8_Nu170_Mlp1_refNup159_FL__1_MMStack_Pos27cell1age16	181101_Run8_Nu170_Mlp1_refNup159_FL__1_MMStack_Pos27cell2age22
							strain	Mlp1-Aged		Mlp1-Aged	protein	Mlp1	Mlp1	Mlp1	Mlp1	Mlp1	Mlp1	Mlp1	Mlp1	Mlp1	Mlp1	Mlp1	Mlp1	Mlp1	Mlp1	Mlp1	Mlp1	Mlp1	Mlp1	Mlp1	Mlp1	Mlp1	Mlp1	Mlp1	Mlp1	Mlp1	Mlp1	Mlp1	Mlp1	Mlp1	Mlp1	Mlp1	Mlp1	Mlp1	Mlp1	Mlp1	Mlp1	Mlp1
							n	37		Mlp1-Aged		1	1	1	1	1	0	1	1	1	1	1	1	1	1	1	1	1	1	1	1	1	1	1	1	1	1	1	1	1	1	1	1	1	1	1	1	1
										Mlp1-Aged	Cells	5	6	10	12	13	1	2	4	5	6	7	9	10	1	3	4	5	6	7	8	9	10	12	1	2	3	4	5	1	2	3	5	5	1	2	1	2
							age	21		Mlp1-Aged	Age	22	19	22	14	23	20	23	21	25	22	23	25	9	19	23	20	22	13	16	20	18	21	23	17	21	16	21	23	17	19	22	18	18	21	20	16	22
							avg	median		Mlp1-Aged	correlation	0.247043	0.246597	-0.126475	0.3395	0.690604	0.343234	0.0614394	0.73113	0.0238989	0.137989	0.335574	0.420722	0.786969	0.193313	0.611529	0.507542	0.563016	0.622633	0.173606	-0.0739973	-0.1325	0.199041	-0.0920908	0.510995	-0.349681	0.499639	0.560654	0.507543	-0.0736017	0.00150344	0.438539	0.649974	0.679574	0.403743	0.553878	-0.608862	0.799438
						correlation	0.307666	0.343234		Mlp1-Aged	GFP	19475.9	20357.3	19821.5	18438.6	19578.7	18191	18375.5	19253	15889.3	17642.1	18897.4	17562.5	17412	18939.9	17712.9	16832.8	18040.7	17895.6	16666.8	18286.4	18303.5	16882.5	16284.3	21386.1	18761.2	19489.2	17519.7	19287.6	18599.4	19405.5	15380.2	17730.6	15729.3	16245.9	16710.4	18676.3	18665
										Mlp1-Aged	stdev	1167.8	1119.18	910.405	1097.55	990.33	843.547	643.953	1122.67	537.009	699.37	983.894	1200.16	593.01	1145.25	1271.51	1152.39	1470.47	824.867	430.738	673.915	893.482	1295.47	982.288	1769.7	770.1	1515.04	861.136	976.986	800.602	670.787	600.368	741.581	706.885	1143.24	531.437	771.375	1093.06
										Mlp1-Aged	mCh	13219.3	15441.3	12810.8	13052	12992.8	12864.5	12219.9	12446.9	10051.1	11158	11935.7	11119	10261.8	12483.4	11623.3	11043.7	11597.1	11405.9	12121.3	13628	12510.4	11662.3	12909.7	18084.6	12444.1	14070.8	11896.7	12385.6	13319.9	15393.4	10442	11841	11335.9	11570.1	12544.3	13711.3	13321.9
										Mlp1-Aged	stdev	989.428	3318.72	671.309	601.73	2200.8	1032.79	947.165	692.468	687.612	370.853	683.883	937.966	625.72	979.965	1360.77	1027.68	1003.03	777.498	1632.17	2505.42	1489.94	979.742	1833.6	2603.51	1559.82	1776.81	1385.48	842.169	1637.4	2115.92	1471.6	1554.45	1121.4	401.654	1798.65	1479.53	1772.95
											File	181129_Run10_Gle1_Gle2_refNup159_BR__1_MMStack_Pos2cell1age0	181129_Run10_Gle1_Gle2_refNup159_BR__1_MMStack_Pos2cell2age2	181129_Run10_Gle1_Gle2_refNup159_BR__1_MMStack_Pos2cell4age1	181129_Run10_Gle1_Gle2_refNup159_BR__1_MMStack_Pos2cell6age1	181129_Run10_Gle1_Gle2_refNup159_BR__1_MMStack_Pos3cell1age1	181129_Run10_Gle1_Gle2_refNup159_BR__1_MMStack_Pos3cell3age0	181129_Run10_Gle1_Gle2_refNup159_BR__1_MMStack_Pos3cell4age3	181129_Run10_Gle1_Gle2_refNup159_BR__1_MMStack_Pos3cell5age1	181129_Run10_Gle1_Gle2_refNup159_BR__1_MMStack_Pos3cell6age1	181129_Run10_Gle1_Gle2_refNup159_BR__1_MMStack_Pos3cell7age2	181129_Run10_Gle1_Gle2_refNup159_BR__1_MMStack_Pos4cell1age0	181129_Run10_Gle1_Gle2_refNup159_BR__1_MMStack_Pos4cell2age1	181129_Run10_Gle1_Gle2_refNup159_BR__1_MMStack_Pos4cell3age1	181129_Run10_Gle1_Gle2_refNup159_BR__1_MMStack_Pos4cell4age2	181129_Run10_Gle1_Gle2_refNup159_BR__1_MMStack_Pos4cell6age1	181129_Run10_Gle1_Gle2_refNup159_BR__1_MMStack_Pos4cell6age1	181129_Run10_Gle1_Gle2_refNup159_BR__1_MMStack_Pos6cell1age0	181129_Run10_Gle1_Gle2_refNup159_BR__1_MMStack_Pos6cell3age1	181129_Run10_Gle1_Gle2_refNup159_BR__1_MMStack_Pos6cell4age1	181129_Run10_Gle1_Gle2_refNup159_BR__1_MMStack_Pos6cell5age2	181129_Run10_Gle1_Gle2_refNup159_BR__1_MMStack_Pos6cell6age3	181129_Run10_Gle1_Gle2_refNup159_BR__1_MMStack_Pos6cell7age1	181129_Run10_Gle1_Gle2_refNup159_BR__1_MMStack_Pos6cell8age1	181129_Run10_Gle1_Gle2_refNup159_BR__1_MMStack_Pos8cell1age1	181129_Run10_Gle1_Gle2_refNup159_BR__1_MMStack_Pos8cell3age0	181129_Run10_Gle1_Gle2_refNup159_BR__1_MMStack_Pos8cell6age1	181129_Run10_Gle1_Gle2_refNup159_BR__1_MMStack_Pos8cell7age1	181129_Run10_Gle1_Gle2_refNup159_BR__1_MMStack_Pos8cell9age1	181129_Run10_Gle1_Gle2_refNup159_BR__1_MMStack_Pos11cell1age0	181129_Run10_Gle1_Gle2_refNup159_BR__1_MMStack_Pos11cell3age2	181129_Run10_Gle1_Gle2_refNup159_BR__1_MMStack_Pos11cell3age2	181129_Run10_Gle1_Gle2_refNup159_BR__1_MMStack_Pos11cell4age2
							strain	Gle1-Young		Gle1-Young	protein	Gle1	Gle1	Gle1	Gle1	Gle1	Gle1	Gle1	Gle1	Gle1	Gle1	Gle1	Gle1	Gle1	Gle1	Gle1	Gle1	Gle1	Gle1	Gle1	Gle1	Gle1	Gle1	Gle1	Gle1	Gle1	Gle1	Gle1	Gle1	Gle1	Gle1	Gle1	Gle1
							n	32		Gle1-Young		0	0	0	0	0	0	0	0	0	0	0	0	0	0	0	0	0	0	0	0	0	0	0	0	0	0	0	0	0	0	0	0
										Gle1-Young	Cells	1	2	4	6	1	3	4	5	6	7	1	2	3	4	6	6	1	3	4	5	6	7	8	1	3	6	7	9	1	3	3	4
							age	1		Gle1-Young	Age	0	2	1	1	1	0	3	1	1	2	0	1	1	2	1	1	0	1	1	2	3	1	1	1	0	1	1	1	0	2	2	2
							avg	median		Gle1-Young	correlation	0.40229	0.888769	0.829611	0.843278	0.656812	0.643539	0.661786	0.515901	0.426709	0.639458	0.618315	0.749358	0.568341	0.341838	0.708126	0.912876	0.760562	0.594623	-0.227001	0.686947	0.773742	0.673243	0.674878	0.327479	0.858005	0.748416	0.683823	0.823654	-0.456637	0.900088	0.811605	0.830011
						correlation	0.620951	0.67935		Gle1-Young	GFP	17704.3	18309	18074.1	17888.2	17665.1	17887.9	16873.8	17128.6	18130.8	17603.2	18891.8	18693.2	17966.3	18376.6	18610.2	17431.1	18522.7	16915.3	17455	17479.6	19142.7	18578.3	18250.5	17540.5	17632.1	18854.4	17794.9	18930.6	18973.9	18887.3	18446.1	19432
										Gle1-Young	stdev	577.125	1586.71	416.619	836.888	656.966	774.542	943.752	678.817	617.119	605.763	1245.92	798.897	509.05	685.01	819.487	749.567	765.29	869.252	745.774	1028.35	1382.88	871.566	520.698	595.633	1180.52	1249.57	949.822	1340.65	431.418	1280.94	728.39	629.613
										Gle1-Young	mCh	11281.4	10942.6	10674.3	9948.42	10713.8	10183.5	9147.98	9774.9	11030.1	10747.7	10495.1	10566.9	9814.44	11303.4	10725.3	10194	11424.5	9448.84	10298.9	10232.3	10837.9	11220.5	10766.1	10724.2	10391	11023.7	11123.7	11355	10950.8	10824.6	10196.3	10822.8
										Gle1-Young	stdev	875.903	1458.4	657.139	773.297	650.146	667.351	566.859	614.769	507.372	632.974	582.056	598.498	307.149	429.07	623.482	955.456	680.929	514.142	527.439	884.119	827.666	986.141	480.802	508.419	676.714	728.755	788.308	1277.76	554.273	916.573	905.215	784.655
											File	File		181129_Run10_Gle1_Gle2_refNup159_BR__1_MMStack_Pos3cell1age12	181129_Run10_Gle1_Gle2_refNup159_BR__1_MMStack_Pos3cell3age9	181129_Run10_Gle1_Gle2_refNup159_BR__1_MMStack_Pos3cell5age11	181129_Run10_Gle1_Gle2_refNup159_FL__1_MMStack_Pos2cell1age18	181129_Run10_Gle1_Gle2_refNup159_BR__1_MMStack_Pos2cell2age16	181129_Run10_Gle1_Gle2_refNup159_BR__1_MMStack_Pos2cell3age20	181129_Run10_Gle1_Gle2_refNup159_BR__1_MMStack_Pos6cell1age21	181129_Run10_Gle1_Gle2_refNup159_BR__1_MMStack_Pos8cell1age14	181129_Run10_Gle1_Gle2_refNup159_BR__1_MMStack_Pos8cell2age12	181129_Run10_Gle1_Gle2_refNup159_BR__1_MMStack_Pos9cell3age15	181129_Run10_Gle1_Gle2_refNup159_BR__1_MMStack_Pos9cell6age16	181129_Run10_Gle1_Gle2_refNup159_BR__1_MMStack_Pos9cell7age15	181129_Run10_Gle1_Gle2_refNup159_BR__1_MMStack_Pos9cell8age12	181129_Run10_Gle1_Gle2_refNup159_FL__1_MMStack_Pos13cell2age20	181129_Run10_Gle1_Gle2_refNup159_BR__1_MMStack_Pos15cell2age18	181129_Run10_Gle1_Gle2_refNup159_BR__1_MMStack_Pos15cell3age20	181129_Run10_Gle1_Gle2_refNup159_BR__1_MMStack_Pos19cell1age22	181213_Run11_RefN159_Gle1_Gle2_4_MMStack_Pos1cell1asym_age23	181213_Run11_RefN159_Gle1_Gle2_4_MMStack_Pos1cell2asym_age20	181213_Run11_RefN159_Gle1_Gle2_4_MMStack_Pos1cell3asym_age21	181213_Run11_RefN159_Gle1_Gle2_4_MMStack_Pos10cell1asym_age25	181213_Run11_RefN159_Gle1_Gle2_4_MMStack_Pos10cell2asym_age23	181213_Run11_RefN159_Gle1_Gle2_4_MMStack_Pos10cell3asym_age24	181213_Run11_RefN159_Gle1_Gle2_4_MMStack_Pos7cell1asym_age23	181213_Run11_RefN159_Gle1_Gle2_4_MMStack_Pos7cell2asym_age19	181213_Run11_RefN159_Gle1_Gle2_4_MMStack_Pos7cell4asym_age21	181213_Run11_RefN159_Gle1_Gle2_4_MMStack_Pos7cell5asym_age23	181213_Run11_RefN159_Gle1_Gle2_4_MMStack_Pos7cell7asym_age18	181213_Run11_RefN159_Gle1_Gle2_4_MMStack_Pos7cell8asym_age17	181213_Run11_RefN159_Gle1_Gle2_4_MMStack_Pos7cell9asym_age22	181213_Run11_RefN159_Gle1_Gle2_4_MMStack_Pos7cell10asym_age17	181213_Run11_RefN159_Gle1_Gle2_4_MMStack_Pos2cell1asym_age25	181213_Run11_RefN159_Gle1_Gle2_4_MMStack_Pos2cell2asym_age16	181213_Run11_RefN159_Gle1_Gle2_4_MMStack_Pos2cell3asym_age23	181213_Run11_RefN159_Gle1_Gle2_4_MMStack_Pos2cell4asym_age23
							strain	Gle1-Aged		Gle1-Aged	protein	protein	Gle1	Gle1	Gle1	Gle1	Gle1	Gle1	Gle1	Gle1	Gle1	Gle1	Gle1	Gle1	Gle1	Gle1	Gle1	Gle1	Gle1	Gle1	Gle1	Gle1	Gle1	Gle1	Gle1	Gle1	Gle1	Gle1	Gle1	Gle1	Gle1	Gle1	Gle1	Gle1	Gle1	Gle1	Gle1	Gle1
							n	36		Gle1-Aged				1	1	1	1	1	1	1	1	1	1	1	1	1	1	1	1	1	1	1	1	1	1	1	1	1	1	1	1	1	1	1	1	1	1	1
										Gle1-Aged	Cells	Cells	35	1	3	5	1	2	3	1	1	2	3	6	7	8	2	2	3	1	1	2	3	1	2	3	1	2	4	5	7	8	9	0	1	2	3	4
							age	20		Gle1-Aged	Age	Age	20	12	9	11	18	16	20	21	14	12	15	16	15	12	20	18	20	22	23	20	21	25	23	24	23	19	21	23	18	17	22	17	25	16	23	23
							avg	median		Gle1-Aged	correlation	correlation	0.244902	0.313509	-0.0543222	-0.248774	0.418622	0.407439	0.304189	0.350576	0.510435	-0.152234	0.0775739	0.408508	0.27949	-0.0757352	0.645423	-0.148095	0.196263	0.104559	0.606408	0.215051	0.151796	0.674595	0.136056	0.280171	0.290096	0.378889	0.791482	-0.193931	-0.258996	0.695279	0.265835	0.196041	0.0878562	0.147886	-0.00498672	0.774634
						correlation	0.244902	0.255369		Gle1-Aged	GFP	GFP	14165.1	17229.8	16848.3	18072	20147.4	19074.4	17738.3	14691.4	15148.2	15665.2	15830.7	19042.7	18222.4	19410.9	16680.7	18020.6	20642.1	18676.2	10948.1	11647.9	12298.4	10776.8	11365.3	9648.18	10415.5	11666.9	9923.17	9022.84	11441.6	11950	10364.5	10247.4	10052.4	12046.5	9692.67	11130.1
										Gle1-Aged	stdev	stdev	892.547	846.913	503.38	762.784	1210.97	567.042	781.88	1070.69	656.825	803.367	341.128	864.016	604.939	1612.52	1077.63	770.507	1225.34	762.16	1454.83	1056.8	986.079	933.947	554.288	1049.36	649.802	1062.2	509.471	628.092	1305.71	1063.77	722.457	742.237	903.626	1054.94	971.719	1127.73
										Gle1-Aged	mCh	mCh	12024.3	11355.3	10491.4	11456.2	13907	13088.1	12055	10549.9	9575.53	10969.6	10807.6	13083	12294.6	12269.5	12100.3	11613.4	13511.8	11807.9	12533.3	14284.3	13414.8	10672.5	12683.7	10717.9	11168.9	12448	10653.7	9459.74	15522.7	14340	11431.5	11419.1	12175.1	14357.1	11114.3	11518.1
										Gle1-Aged	stdev	stdev	1140.79	2366.37	1089.37	452.063	1856.58	1313.65	1329.64	974.151	713.111	610.415	992.264	948.192	1081.38	998.472	1378.07	906.66	1167.88	890.09	1337.11	1070.37	1617.41	816.188	1193.4	741.247	904.737	997.807	1068.14	416.178	2148.92	959.211	1253.49	1028.93	1439.53	1382.27	1433.55	1050.77
										Nup60_Nup159_young	File	180619_11990_10885_Nup60Nup159_Nup170timer_Fl1_1_MMStack_Pos1cell1age2	180619_11990_10885_Nup60Nup159_Nup170timer_Fl1_1_MMStack_Pos1cell4age3	180619_11990_10885_Nup60Nup159_Nup170timer_Fl1_1_MMStack_Pos1cell5age2	180619_11990_10885_Nup60Nup159_Nup170timer_Fl1_1_MMStack_Pos1cell6age2	180619_11990_10885_Nup60Nup159_Nup170timer_Fl1_1_MMStack_Pos1cell7age2	180619_11990_10885_Nup60Nup159_Nup170timer_Fl1_1_MMStack_Pos2cell1age2	180619_11990_10885_Nup60Nup159_Nup170timer_Fl1_1_MMStack_Pos3cell1age2	180619_11990_10885_Nup60Nup159_Nup170timer_Fl1_1_MMStack_Pos3cell3age2	180619_11990_10885_Nup60Nup159_Nup170timer_Fl1_1_MMStack_Pos3cell5age0	180619_11990_10885_Nup60Nup159_Nup170timer_Fl1_1_MMStack_Pos4cell1age0	180619_11990_10885_Nup60Nup159_Nup170timer_Fl1_1_MMStack_Pos4cell2age3	180619_11990_10885_Nup60Nup159_Nup170timer_Fl1_1_MMStack_Pos4cell3age1	180619_11990_10885_Nup60Nup159_Nup170timer_Fl1_1_MMStack_Pos4cell5age1	180619_11990_10885_Nup60Nup159_Nup170timer_Fl1_1_MMStack_Pos4cell8age2	180619_11990_10885_Nup60Nup159_Nup170timer_Fl1_1_MMStack_Pos5cell2age2	180619_11990_10885_Nup60Nup159_Nup170timer_Fl1_1_MMStack_Pos5cell5age1	180619_11990_10885_Nup60Nup159_Nup170timer_Fl1_1_MMStack_Pos5cell8age3	180619_11990_10885_Nup60Nup159_Nup170timer_Fl1_1_MMStack_Pos5cell11age1	180619_11990_10885_Nup60Nup159_Nup170timer_Fl1_1_MMStack_Pos6cell1age3	180619_11990_10885_Nup60Nup159_Nup170timer_Fl1_1_MMStack_Pos6cell2age2	180619_11990_10885_Nup60Nup159_Nup170timer_Fl1_1_MMStack_Pos6cell5age1	180619_11990_10885_Nup60Nup159_Nup170timer_Fl1_1_MMStack_Pos6cell6age0	180619_11990_10885_Nup60Nup159_Nup170timer_Fl1_1_MMStack_Pos6cell7age0	180619_11990_10885_Nup60Nup159_Nup170timer_Fl1_1_MMStack_Pos7cell1age0	180619_11990_10885_Nup60Nup159_Nup170timer_Fl1_1_MMStack_Pos7cell2age1	180619_11990_10885_Nup60Nup159_Nup170timer_Fl1_1_MMStack_Pos7cell3age2	180619_11990_10885_Nup60Nup159_Nup170timer_Fl1_1_MMStack_Pos7cell4age2	180619_11990_10885_Nup60Nup159_Nup170timer_Fl1_1_MMStack_Pos8cell1age3	180619_11990_10885_Nup60Nup159_Nup170timer_Fl1_1_MMStack_Pos8cell2age0	180619_11990_10885_Nup60Nup159_Nup170timer_Fl1_1_MMStack_Pos9cell1age2	180619_11990_10885_Nup60Nup159_Nup170timer_Fl1_1_MMStack_Pos9cell2age0	180619_11990_10885_Nup60Nup159_Nup170timer_Fl1_1_MMStack_Pos9cell5age0	180619_11990_10885_Nup60Nup159_Nup170timer_Fl1_1_MMStack_Pos9cell6age1
								Nup60		Nup60_Nup159_young	protein	Nup60	Nup60	Nup60	Nup60	Nup60	Nup60	Nup60	Nup60	Nup60	Nup60	Nup60	Nup60	Nup60	Nup60	Nup60	Nup60	Nup60	Nup60	Nup60	Nup60	Nup60	Nup60	Nup60	Nup60	Nup60	Nup60	Nup60	Nup60	Nup60	Nup60	Nup60	Nup60	Nup60
										Nup60_Nup159_young	cluster	0	0	0	0	0	0	0	0	0	0	0	0	0	0	0	0	0	0	0	0	0	0	0	0	0	0	0	0	0	0	0	0	0
							33	33		Nup60_Nup159_young	Cell	1	4	5	6	7	1	1	3	5	1	2	3	5	8	2	5	8	11	1	2	5	6	7	1	2	3	4	1	2	1	2	5	6
							2	2		Nup60_Nup159_young	Age	2	3	2	2	2	2	2	2	0	0	3	1	1	2	2	1	3	1	3	2	1	0	0	0	1	2	2	3	0	2	0	0	1
							0.579407	0.556336		Nup60_Nup159_young	correlation	0.488507	0.735107	0.750121	0.392199	0.0318509	0.387001	0.539593	0.835518	0.433702	0.401912	0.670429	0.192523	0.761717	0.579407	0.445986	0.820383	0.515035	0.402144	0.675727	0.365971	0.927594	0.649927	0.934937	0.268636	0.748859	0.65507	0.274508	0.814186	0.586503	0.695459	0.377377	0.271137	0.730055
								6211.81		Nup60_Nup159_young	GFP	6743.17	6994.3	6646.19	6716.71	7122	5602.88	6024.27	7034.98	6599.7	5164.81	6488.24	6928.85	5273.23	6888.68	6496.04	7028.9	5132.81	6741.95	6332.39	6054.39	5564.22	5413.56	5524.51	5755.99	6154.07	6158.36	7233.68	6303.44	5434.65	5360.23	5713.38	5983.93	6375.3
								810.931		Nup60_Nup159_young	stdev	665.659	1108.31	768.055	688.707	571.836	546.518	949.221	1062.57	626.063	791.426	730.481	671.304	525.635	1096.45	912.662	1267.77	639.465	566.813	608.653	628.681	1106.66	758.154	924.011	833.938	1022.88	789.931	744.212	1110.52	999.71	792.146	603.192	636.423	1012.68
								6543.02		Nup60_Nup159_young	mCh	7001.35	6056.62	7170.91	6933.32	8003.66	5210.07	6196.62	6558.81	6413.75	5353.71	7206.09	7998.88	5973.6	6335.95	6914.97	7172.7	4723.8	6848.45	5748.74	6728.01	6659.76	5911.69	6626.06	7147.42	6585.17	6497.76	7444.04	6699.91	6800.47	5710.54	5904.65	6985.15	6397.09
								719.69		Nup60_Nup159_young	stdev	712.382	588.783	818.318	600.586	770.151	249.122	530.41	811.971	717.501	602.631	648.433	939.749	453.174	454.838	963.142	831.827	457.495	639.843	533.73	774.908	1237.96	600.08	1207.26	850.829	649.189	566.392	703.489	923.6	762.473	823.926	680.8	874.13	770.668
										Nup60_Nup159_aged	File	180619_11990_10885_Nup60Nup159_Nup170timer_Fl1_1_MMStack_Pos2cell1age20	180619_11990_10885_Nup60Nup159_Nup170timer_Fl1_1_MMStack_Pos3cell1age19	180619_11990_10885_Nup60Nup159_Nup170timer_Fl1_1_MMStack_Pos4cell1age22	180619_11990_10885_Nup60Nup159_Nup170timer_Fl1_1_MMStack_Pos4cell2age9	180619_11990_10885_Nup60Nup159_Nup170timer_Fl1_1_MMStack_Pos4cell4age20	180619_11990_10885_Nup60Nup159_Nup170timer_Fl1_1_MMStack_Pos4cell5age22	180619_11990_10885_Nup60Nup159_Nup170timer_Fl1_1_MMStack_Pos6cell2age19	180619_11990_10885_Nup60Nup159_Nup170timer_Fl1_1_MMStack_Pos6cell4age18	180619_11990_10885_Nup60Nup159_Nup170timer_Fl1_1_MMStack_Pos6cell5age20	180619_11990_10885_Nup60Nup159_Nup170timer_Fl1_1_MMStack_Pos6cell6age20	180619_11990_10885_Nup60Nup159_Nup170timer_Fl1_1_MMStack_Pos6cell7age20	180619_11990_10885_Nup60Nup159_Nup170timer_Fl1_1_MMStack_Pos11cell1age18	180619_11990_10885_Nup60Nup159_Nup170timer_Fl1_1_MMStack_Pos11cell2age12	180619_11990_10885_Nup60Nup159_Nup170timer_Fl1_1_MMStack_Pos11cell4age22	180619_11990_10885_Nup60Nup159_Nup170timer_Fl1_1_MMStack_Pos11cell8age16	180619_11990_10885_Nup60Nup159_Nup170timer_Fl1_1_MMStack_Pos11cell10age20	180619_11990_10885_Nup60Nup159_Nup170timer_Fl1_1_MMStack_Pos12cell1age21	180619_11990_10885_Nup60Nup159_Nup170timer_Fl1_1_MMStack_Pos12cell2age24	180619_11990_10885_Nup60Nup159_Nup170timer_Fl1_1_MMStack_Pos13cell1age16	180619_11990_10885_Nup60Nup159_Nup170timer_Fl1_1_MMStack_Pos13cell5age24	180619_11990_10885_Nup60Nup159_Nup170timer_Fl1_1_MMStack_Pos13cell4age11	180619_11990_10885_Nup60Nup159_Nup170timer_Fl1_1_MMStack_Pos13cell7age21	180619_11990_10885_Nup60Nup159_Nup170timer_Fl1_1_MMStack_Pos13cell10age17	180619_11990_10885_Nup60Nup159_Nup170timer_Fl1_1_MMStack_Pos13cell13age22	180619_11990_10885_Nup60Nup159_Nup170timer_Fl1_1_MMStack_Pos14cell2age17	180619_11990_10885_Nup60Nup159_Nup170timer_Fl1_1_MMStack_Pos14cell4age22	180619_11990_10885_Nup60Nup159_Nup170timer_Fl1_1_MMStack_Pos15cell2age18	180619_11990_10885_Nup60Nup159_Nup170timer_Fl1_1_MMStack_Pos15cell3age22	180619_11990_10885_Nup60Nup159_Nup170timer_Fl1_1_MMStack_Pos16cell1age20	180619_11990_10885_Nup60Nup159_Nup170timer_Fl1_1_MMStack_Pos16cell2age6	180619_11990_10885_Nup60Nup159_Nup170timer_Fl1_1_MMStack_Pos16cell3age24	180619_11990_10885_Nup60Nup159_Nup170timer_Fl1_1_MMStack_Pos17cell1age4
								Nup60		Nup60_Nup159_aged	protein	Nup60	Nup60	Nup60	Nup60	Nup60	Nup60	Nup60	Nup60	Nup60	Nup60	Nup60	Nup60	Nup60	Nup60	Nup60	Nup60	Nup60	Nup60	Nup60	Nup60	Nup60	Nup60	Nup60	Nup60	Nup60	Nup60	Nup60	Nup60	Nup60	Nup60	Nup60	Nup60
										Nup60_Nup159_aged	cluster	1	1	1	1	1	1	1	1	1	1	1	1	1	1	1	1	1	1	1	1	1	1	1	1	1	1	1	1	1	1	1	0
							32	32		Nup60_Nup159_aged	Cell	1	1	1	2	4	5	2	4	5	6	7	1	2	4	8	10	1	2	1	4	3	7	10	13	2	4	2	3	1	2	3	1
							20	20		Nup60_Nup159_aged	Age	20	19	19	9	20	22	19	18	20	20	20	18	12	22	16	20	21	24	16	24	24	24	17	22	17	22	18	22	20	6	24	4
							0.246763	0.27228		Nup60_Nup159_aged	correlation	0.106996	0.226795	0.164328	0.392363	0.0915711	0.452166	0.331984	0.1551	0.647793	0.388662	0.829437	-0.0770634	0.250952	0.12534	-0.0517781	0.400829	0.278836	0.734082	0.165094	0.384294	0.242574	0.538314	0.194382	-0.13003	0.262834	0.0264399	0.199654	0.163763	-0.192131	0.593737	0.517753	0.297895
								5529.62		Nup60_Nup159_aged	GFP	5774.55	4848.22	5771.33	4132.01	5047.12	4474.73	6521.03	6943.05	6306.26	5921.47	5279.99	6174.77	5000.98	6329.3	5727.38	6997.2	5300.41	4992.16	5612.67	4878.2	4815.81	4995.89	5841.82	5230.62	6038.19	6767.12	5024.4	5122.83	5519.17	4838.09	4907.21	5813.84
								785.35		Nup60_Nup159_aged	stdev	824.555	622.539	969.467	751.113	457.103	764.933	1017.77	868.177	1227.38	1187.57	818.355	1229.68	584.172	556.282	943.275	1035.32	659.159	1117.47	458.012	672.457	703.041	470.358	798.513	829.247	841.286	701.008	951.58	373.816	658.299	695.542	777.758	565.953
								8526.16		Nup60_Nup159_aged	mCh	10921	8868.05	8439.1	5963.43	9572.39	6922.02	10664.1	10552.9	9458.48	9052.49	6562.57	10908.7	8283.23	9048.66	6970.93	9527.19	7442.21	7247.04	6980.25	7990.54	7277.06	8955.72	11468.4	6884.36	8723.79	11836.4	9124.44	7494.34	10095.4	5988.83	6605.17	7008.07
								1598.04		Nup60_Nup159_aged	stdev	2971.84	4017.24	1256.08	1269.66	1659.55	741.439	1431.52	1136.32	1242.6	1219.97	760.945	2430.75	1728.12	1714.14	1580.17	1504.52	2305.14	1653.89	786.496	3480.94	935.101	1988.82	2385.14	943.757	1037.26	1651.68	1462.61	1113.02	2254.18	950.083	728.535	795.708
							File	190416_Run16_N159_N170_Sgf73D_Fob1D_Br_3_MMStack_Pos2cell2asym_age2						190416_Run16_N159_N170_Sgf73D_Fob1D_Br_3_MMStack_Pos2cell3asym_age2					190416_Run16_N159_N170_Sgf73D_Fob1D_Br_3_MMStack_Pos2cell5asym_age2					190416_Run16_N159_N170_Sgf73D_Fob1D_Br_3_MMStack_Pos2cell7asym_age1					190416_Run16_N159_N170_Sgf73D_Fob1D_Br_3_MMStack_Pos2cell8asym_age3					190416_Run16_N159_N170_Sgf73D_Fob1D_Br_3_MMStack_Pos2cell9asym_age1					190416_Run16_N159_N170_Sgf73D_Fob1D_Br_3_MMStack_Pos2cell10asym_age1					190416_Run16_N159_N170_Sgf73D_Fob1D_Br_3_MMStack_Pos2cell11asym_age2					190416_Run16_N159_N170_Sgf73D_Fob1D_Br_3_MMStack_Pos2cell13asym_age1
							protein	Nup170_Sgf73D						Nup170_Sgf73D					Nup170_Sgf73D					Nup170_Sgf73D					Nup170_Sgf73D					Nup170_Sgf73D					Nup170_Sgf73D					Nup170_Sgf73D					Nup170_Sgf73D
							Cell	2						3					5					7					8					9					0					1					3
							Age	2						2					2					1					3					1					1					2					1
							correlation	0.596499						0.902187					0.842851					0.636118					0.800021					0.718233					0.831529					0.850712					0.775258
							GFP	10402.5						10255.9					9468.14					9081.54					9637.81					11064.5					10475.6					10432.2					11056.4
							stdev	581.876						575.021					624.002					437.168					543.3					509.252					488.374					546.154					525.923
							mCh	11550.7						11037.6					11145.2					10490.5					10684.2					11803.8					11341					10969.7					11479.3
							stdev	1039.4						889.036					1075.17					578.89					1222.55					1063.59					956.462					1378.91					829.509
																			File	191023_Run22_N159_N170_Sgf73D_Fob1D_Fl_1_MMStack_Pos2cell2asym_age2					191023_Run22_N159_N170_Sgf73D_Fob1D_Fl_1_MMStack_Pos2cell4asym_age1					191023_Run22_N159_N170_Sgf73D_Fob1D_Fl_1_MMStack_Pos2cell7asym_age3					191023_Run22_N159_N170_Sgf73D_Fob1D_Fl_1_MMStack_Pos2cell9asym_age2					191023_Run22_N159_N170_Sgf73D_Fob1D_Fl_1_MMStack_Pos2cell11asym_age1					191023_Run22_N159_N170_Sgf73D_Fob1D_Fl_1_MMStack_Pos2cell13asym_age0
																			protein	Nup170_Fob1D					Nup170_Fob1D					Nup170_Fob1D					Nup170_Fob1D					Nup170_Fob1D					Nup170_Fob1D
																			Cell	2					4					7					9					1					3
																			Age	2					1					3					2					1					0
																			correlation	0.452924					0.803206					0.534241					0.571793					0.838396					0.675115
																			GFP	8918.94					9877.07					11075.6					9935.8					8901.57					10113.3
																			stdev	309.322					276.222					360.491					243.443					264.1					235.326
																			mCh	9863.1					10553					11388.8					10031.3					9921.76					10569.2
																			stdev	833.669					883.936					790.957					530.035					855.608					681.229
																			File	191023_Run22_N159_N170_Sgf73D_Fob1D_Fl_1_MMStack_Pos2cell2asym_age2	191023_Run22_N159_N170_Sgf73D_Fob1D_Fl_1_MMStack_Pos2cell4asym_age1	191023_Run22_N159_N170_Sgf73D_Fob1D_Fl_1_MMStack_Pos2cell7asym_age3	191023_Run22_N159_N170_Sgf73D_Fob1D_Fl_1_MMStack_Pos2cell9asym_age2	191023_Run22_N159_N170_Sgf73D_Fob1D_Fl_1_MMStack_Pos2cell11asym_age1	191023_Run22_N159_N170_Sgf73D_Fob1D_Fl_1_MMStack_Pos2cell13asym_age0	191023_Run22_N159_N170_Sgf73D_Fob1D_Fl_1_MMStack_Pos2cell15asym_age2	191023_Run22_N159_N170_Sgf73D_Fob1D_Fl_1_MMStack_Pos2cell17asym_age2	191023_Run22_N159_N170_Sgf73D_Fob1D_Br_1_MMStack_Pos3cell2asym_age1	191023_Run22_N159_N170_Sgf73D_Fob1D_Br_1_MMStack_Pos3cell5asym_age2	191023_Run22_N159_N170_Sgf73D_Fob1D_Br_1_MMStack_Pos3cell7asym_age2	191023_Run22_N159_N170_Sgf73D_Fob1D_Br_1_MMStack_Pos3cell9asym_age2	191023_Run22_N159_N170_Sgf73D_Fob1D_Br_1_MMStack_Pos3cell11asym_age1	191023_Run22_N159_N170_Sgf73D_Fob1D_Br_1_MMStack_Pos3cell13asym_age3	191023_Run22_N159_N170_Sgf73D_Fob1D_Br_1_MMStack_Pos3cell15asym_age2	191023_Run22_N159_N170_Sgf73D_Fob1D_Br_1_MMStack_Pos4cell2asym_age0	191023_Run22_N159_N170_Sgf73D_Fob1D_Br_1_MMStack_Pos4cell4asym_age1	191023_Run22_N159_N170_Sgf73D_Fob1D_Br_1_MMStack_Pos4cell6asym_age1	191023_Run22_N159_N170_Sgf73D_Fob1D_Br_1_MMStack_Pos4cell8asym_age0	191023_Run22_N159_N170_Sgf73D_Fob1D_Br_1_MMStack_Pos4cell11asym_age1	191023_Run22_N159_N170_Sgf73D_Fob1D_Br_1_MMStack_Pos4cell14asym_age1	191023_Run22_N159_N170_Sgf73D_Fob1D_Br_1_MMStack_Pos5cell2asym_age1	191023_Run22_N159_N170_Sgf73D_Fob1D_Br_1_MMStack_Pos5cell4asym_age1	191023_Run22_N159_N170_Sgf73D_Fob1D_Br_1_MMStack_Pos5cell6asym_age2	191023_Run22_N159_N170_Sgf73D_Fob1D_Br_1_MMStack_Pos5cell8asym_age2	191023_Run22_N159_N170_Sgf73D_Fob1D_Br_1_MMStack_Pos5cell12asym_age2	191023_Run22_N159_N170_Sgf73D_Fob1D_Br_1_MMStack_Pos6cell2asym_age1	191023_Run22_N159_N170_Sgf73D_Fob1D_Br_1_MMStack_Pos6cell4asym_age3	191023_Run22_N159_N170_Sgf73D_Fob1D_Br_1_MMStack_Pos6cell6asym_age2	191023_Run22_N159_N170_Sgf73D_Fob1D_Br_1_MMStack_Pos6cell9asym_age2
							File	protein			Cell	Age	correlation	GFP	stdev	mCh	stdev		protein	Nup170_Fob1D	Nup170_Fob1D	Nup170_Fob1D	Nup170_Fob1D	Nup170_Fob1D	Nup170_Fob1D	Nup170_Fob1D	Nup170_Fob1D	Nup170_Fob1D	Nup170_Fob1D	Nup170_Fob1D	Nup170_Fob1D	Nup170_Fob1D	Nup170_Fob1D	Nup170_Fob1D	Nup170_Fob1D	Nup170_Fob1D	Nup170_Fob1D	Nup170_Fob1D	Nup170_Fob1D	Nup170_Fob1D	Nup170_Fob1D	Nup170_Fob1D	Nup170_Fob1D	Nup170_Fob1D	Nup170_Fob1D	Nup170_Fob1D	Nup170_Fob1D	Nup170_Fob1D	Nup170_Fob1D
							191023_Run22_N159_N170_Sgf73D_Fob1D_Fl_1_MMStack_Pos2cell2asym_age2	Nup170_Fob1D			2	2	0.452924	8918.94	309.322	9863.1	833.669
							191023_Run22_N159_N170_Sgf73D_Fob1D_Fl_1_MMStack_Pos2cell4asym_age1	Nup170_Fob1D			4	1	0.803206	9877.07	276.222	10553	883.936		Cell	2	4	7	9	1	3	5	7	2	5	7	9	1	3	5	2	4	6	8	1	4	2	4	6	8	2	2	4	6	9
							191023_Run22_N159_N170_Sgf73D_Fob1D_Fl_1_MMStack_Pos2cell7asym_age3	Nup170_Fob1D			7	3	0.534241	11075.6	360.491	11388.8	790.957		Age	2	1	3	2	1	0	2	2	1	2	2	2	1	3	2	0	1	1	0	1	1	1	1	2	2	2	1	3	2	2
							191023_Run22_N159_N170_Sgf73D_Fob1D_Fl_1_MMStack_Pos2cell9asym_age2	Nup170_Fob1D			9	2	0.571793	9935.8	243.443	10031.3	530.035		correlation	0.452924	0.803206	0.534241	0.571793	0.838396	0.675115	0.402844	0.671047	0.674178	0.702448	0.545113	0.645061	0.892391	0.935835	0.492154	0.842071	0.870783	0.577744	0.545325	0.796574	0.307096	0.657383	0.834057	0.631437	0.612787	0.575459	0.875716	0.733424	0.865656	0.898874
							191023_Run22_N159_N170_Sgf73D_Fob1D_Fl_1_MMStack_Pos2cell11asym_age1	Nup170_Fob1D			1	1	0.838396	8901.57	264.1	9921.76	855.608		GFP	8918.94	9877.07	11075.6	9935.8	8901.57	10113.3	8875.64	9789.24	9701.26	7509.43	7385.76	9723.27	9536.54	9273.45	8893.25	7495.06	8874.56	9163.64	9590.7	9975.82	8104.44	8556.57	8977.09	8924.58	9825.44	8273.93	10032.7	8784.15	10091.9	9866.05
							191023_Run22_N159_N170_Sgf73D_Fob1D_Fl_1_MMStack_Pos2cell13asym_age0	Nup170_Fob1D			3	0	0.675115	10113.3	235.326	10569.2	681.229		stdev	309.322	276.222	360.491	243.443	264.1	235.326	181.397	301.5	406.974	289.754	259.477	336.328	385.179	358.399	311.228	288.83	307.182	223.714	283.355	322.873	154.014	261.973	414.487	371.553	225.132	200.076	357.753	300.101	350.698	253.482
							191023_Run22_N159_N170_Sgf73D_Fob1D_Fl_1_MMStack_Pos2cell15asym_age2	Nup170_Fob1D			5	2	0.402844	8875.64	181.397	9644.86	656.397		mCh	9863.1	10553	11388.8	10031.3	9921.76	10569.2	9644.86	10295.2	10268	9075.89	9040.74	10059.8	9898.61	9657.59	9424.27	8755.93	9307.54	9872.92	10344.5	10378	8051.99	9139.77	10358.3	9537.23	10184.5	8620.56	11279.1	9334.3	9536.46	10006.8
							191023_Run22_N159_N170_Sgf73D_Fob1D_Fl_1_MMStack_Pos2cell17asym_age2	Nup170_Fob1D			7	2	0.671047	9789.24	301.5	10295.2	624.737		stdev	833.669	883.936	790.957	530.035	855.608	681.229	656.397	624.737	915.915	1012.91	708.551	805.378	1174.48	961.225	873.902	899.208	782.42	585.9	689.525	1024.6	346.821	936.274	913.653	855.143	583.261	515.206	1310.34	492.519	1009.16	660.634
							191023_Run22_N159_N170_Sgf73D_Fob1D_Br_1_MMStack_Pos3cell2asym_age1	Nup170_Fob1D			2	1	0.674178	9701.26	406.974	10268	915.915
							191023_Run22_N159_N170_Sgf73D_Fob1D_Br_1_MMStack_Pos3cell5asym_age2	Nup170_Fob1D			5	2	0.702448	7509.43	289.754	9075.89	1012.91
							191023_Run22_N159_N170_Sgf73D_Fob1D_Br_1_MMStack_Pos3cell7asym_age2	Nup170_Fob1D			7	2	0.545113	7385.76	259.477	9040.74	708.551
							191023_Run22_N159_N170_Sgf73D_Fob1D_Br_1_MMStack_Pos3cell9asym_age2	Nup170_Fob1D			9	2	0.645061	9723.27	336.328	10059.8	805.378
							191023_Run22_N159_N170_Sgf73D_Fob1D_Br_1_MMStack_Pos3cell11asym_age1	Nup170_Fob1D			1	1	0.892391	9536.54	385.179	9898.61	1174.48
							191023_Run22_N159_N170_Sgf73D_Fob1D_Br_1_MMStack_Pos3cell13asym_age3	Nup170_Fob1D			3	3	0.935835	9273.45	358.399	9657.59	961.225
							191023_Run22_N159_N170_Sgf73D_Fob1D_Br_1_MMStack_Pos3cell15asym_age2	Nup170_Fob1D			5	2	0.492154	8893.25	311.228	9424.27	873.902
							191023_Run22_N159_N170_Sgf73D_Fob1D_Br_1_MMStack_Pos4cell2asym_age0	Nup170_Fob1D			2	0	0.842071	7495.06	288.83	8755.93	899.208
							191023_Run22_N159_N170_Sgf73D_Fob1D_Br_1_MMStack_Pos4cell4asym_age1	Nup170_Fob1D			4	1	0.870783	8874.56	307.182	9307.54	782.42
							191023_Run22_N159_N170_Sgf73D_Fob1D_Br_1_MMStack_Pos4cell6asym_age1	Nup170_Fob1D			6	1	0.577744	9163.64	223.714	9872.92	585.9
							191023_Run22_N159_N170_Sgf73D_Fob1D_Br_1_MMStack_Pos4cell8asym_age0	Nup170_Fob1D			8	0	0.545325	9590.7	283.355	10344.5	689.525
							191023_Run22_N159_N170_Sgf73D_Fob1D_Br_1_MMStack_Pos4cell11asym_age1	Nup170_Fob1D			1	1	0.796574	9975.82	322.873	10378	1024.6
							191023_Run22_N159_N170_Sgf73D_Fob1D_Br_1_MMStack_Pos4cell14asym_age1	Nup170_Fob1D			4	1	0.307096	8104.44	154.014	8051.99	346.821
							191023_Run22_N159_N170_Sgf73D_Fob1D_Br_1_MMStack_Pos5cell2asym_age1	Nup170_Fob1D			2	1	0.657383	8556.57	261.973	9139.77	936.274
							191023_Run22_N159_N170_Sgf73D_Fob1D_Br_1_MMStack_Pos5cell4asym_age1	Nup170_Fob1D			4	1	0.834057	8977.09	414.487	10358.3	913.653
							191023_Run22_N159_N170_Sgf73D_Fob1D_Br_1_MMStack_Pos5cell6asym_age2	Nup170_Fob1D			6	2	0.631437	8924.58	371.553	9537.23	855.143
							191023_Run22_N159_N170_Sgf73D_Fob1D_Br_1_MMStack_Pos5cell8asym_age2	Nup170_Fob1D			8	2	0.612787	9825.44	225.132	10184.5	583.261
							191023_Run22_N159_N170_Sgf73D_Fob1D_Br_1_MMStack_Pos5cell12asym_age2	Nup170_Fob1D			2	2	0.575459	8273.93	200.076	8620.56	515.206
							191023_Run22_N159_N170_Sgf73D_Fob1D_Br_1_MMStack_Pos6cell2asym_age1	Nup170_Fob1D			2	1	0.875716	10032.7	357.753	11279.1	1310.34
							191023_Run22_N159_N170_Sgf73D_Fob1D_Br_1_MMStack_Pos6cell4asym_age3	Nup170_Fob1D			4	3	0.733424	8784.15	300.101	9334.3	492.519
							191023_Run22_N159_N170_Sgf73D_Fob1D_Br_1_MMStack_Pos6cell6asym_age2	Nup170_Fob1D			6	2	0.865656	10091.9	350.698	9536.46	1009.16
							191023_Run22_N159_N170_Sgf73D_Fob1D_Br_1_MMStack_Pos6cell9asym_age2	Nup170_Fob1D			9	2	0.898874	9866.05	253.482	10006.8	660.634
							191023_Run22_N159_N170_Sgf73D_Fob1D_Br_1_MMStack_Pos6cell11asym_age1	Nup170_Fob1D			1	1	0.774954	9342.35	372.433	9829.71	739.239
[truncated: 25 more columns]

## Sheet: Young_Nup170_N84
	File					File	250420_NupNup_TR86.3.4_FL_1_MMStack_Pos21cell1age1				250420_NupNup_TR86.3.4_FL_1_MMStack_Pos21cell2age1				250420_NupNup_TR86.3.4_FL_1_MMStack_Pos22cell1age2				250420_NupNup_TR86.3.4_FL_1_MMStack_Pos22cell2age2				250420_NupNup_TR86.3.4_FL_1_MMStack_Pos22cell2age2				250420_NupNup_TR86.3.4_FL_1_MMStack_Pos22cell4age2				250420_NupNup_TR86.3.4_FL_1_MMStack_Pos23cell1age1				250420_NupNup_TR86.3.4_FL_1_MMStack_Pos23cell3age1				250420_NupNup_TR86.3.4_FL_1_MMStack_Pos23cell5age1				250420_NupNup_TR86.3.4_FL_1_MMStack_Pos24cell1age1				250420_NupNup_TR86.3.4_FL_1_MMStack_Pos24cell2age1
	protein	Nup170-GFP				protein	Nup170-GFP				Nup170-GFP				Nup170-GFP				Nup170-GFP				Nup170-GFP				Nup170-GFP				Nup170-GFP				Nup170-GFP				Nup170-GFP				Nup170-GFP				Nup170-GFP
	visible cluster	0				visible cluster	0				0				0				0				0				0				0				0				0				0				0
	Cells	14				Cell	1				2				1				2				4				4				1				3				5				5				2
	Age	1.35714				Age	1				1				2				2				2				2				1				1				1				1				1
	correlation	0.786327				correlation	0.979185				0.938643				0.934287				0.807753				0.804441				0.55721				0.719451				0.73448				0.78871				0.715434				0.749358
	GFP	6022.71				GFP	6734.13				7908.81				5188.47				5546.24				5702.71				4841.85				6714.63				6317.63				6507.85				5973.56				6265.13
	stdev	682.495				stdev	1251.21				1001.67				667.051				518.225				681.285				460.706				812.66				470.073				497.063				517.807				444.34
	mCh	7149.48				mCh	7224.12				8471.91				6746.66				6393.05				6774.35				6356.23				7361.68				7529.34				7605.34				7215.47				8154.97
	stdev	1097.27				stdev	2600.8				2034.67				951.044				776.638				844.622				870.428				1255.68				675.971				906.514				660.946				812.888
							0	8301	11153		0	8974	9360		0	5925	8212		0	4671	5045		0	6268	6762		0	5613	5712		0	7244	8586		0	6525	6612		0	7437	7585		0	6418	6620		0	5537	6648
							2.328e-06	8674.46	11193.5		2.328e-06	8279.77	7810.55		2.328e-06	5812.23	7440.17		2.328e-06	5454	5383		2.328e-06	6770.36	7696		2.328e-06	5405.85	5873.32		2.328e-06	7583.31	9167.26		2.328e-06	6418.01	7010.46		2.328e-06	6712.14	8063.93		2.328e-06	6691.86	7728.8		2.328e-06	5979.88	7299.28
							4.657e-06	8703.64	10737.9		4.657e-06	6880.56	6572.52		4.657e-06	5149.25	6602.72		4.657e-06	6233	6585		4.657e-06	6461.88	7712.71		4.657e-06	4999.69	6450.59		4.657e-06	8142.77	9249.08		4.657e-06	6443.39	7787.1		4.657e-06	6934.02	8361.81		4.657e-06	6762.1	7912.91		4.657e-06	5853.84	7213.19
							6.985e-06	9048.08	10777.6		6.985e-06	7021.3	6945.2		6.985e-06	4594.95	5680.72		6.985e-06	5925.57	7196.51		6.985e-06	5919.18	7041.35		6.985e-06	4952.31	6400.31		6.985e-06	8007.52	9288.06		6.985e-06	6669.35	7622.55		6.985e-06	7140.49	8800.25		6.985e-06	6375.31	7732.61		6.985e-06	5722.64	7188.24
							9.313e-06	7765.22	9129.02		9.313e-06	7301.3	7336.4		9.313e-06	4403.71	5511.12		9.313e-06	5661.87	6524.84		9.313e-06	5822.27	6650.85		9.313e-06	5138.8	6489.65		9.313e-06	8362.32	9540.64		9.313e-06	7093.01	8025.6		9.313e-06	7086.77	8806.52		9.313e-06	6211.88	8052.67		9.313e-06	5622.52	7206.65
							1.164e-05	6808.1	7519.32		1.164e-05	7607.69	7369.11		1.164e-05	4246.73	5740.21		1.164e-05	5576.75	6046.86		1.164e-05	5739.61	6645.53		1.164e-05	5092.55	6392.09		1.164e-05	8337.56	8989.92		1.164e-05	6957.68	8660.73		1.164e-05	6691.93	8215.15		1.164e-05	5868	7952.19		1.164e-05	5509.98	7014.1
							1.397e-05	6309.05	6640.19		1.397e-05	7669.4	7127.43		1.397e-05	3860.35	5459		1.397e-05	5581.47	6530.69		1.397e-05	5983.78	6432.61		1.397e-05	5167.35	6792.55		1.397e-05	7956.52	8072.47		1.397e-05	6890.11	8480.63		1.397e-05	6369.44	8099.57		1.397e-05	6349.65	7671.55		1.397e-05	5540.77	6808.4
							1.63e-05	6454.19	6549.47		1.63e-05	7234.27	6979.99		1.63e-05	3919.5	4668.7		1.63e-05	5406.35	7052.38		1.63e-05	6334.11	6931.89		1.63e-05	5245.9	7316.45		1.63e-05	7458.84	7375.17		1.63e-05	6606.71	8429.87		1.63e-05	6904.09	8412.71		1.63e-05	6591.65	8358.1		1.63e-05	5991.81	7361.79
							1.863e-05	6223.38	5961.61		1.863e-05	7193.76	6550.84		1.863e-05	4055.8	4969.89		1.863e-05	5225.4	6770.95		1.863e-05	6342.47	8195.61		1.863e-05	5085.53	7236.57		1.863e-05	6763.75	6907.68		1.863e-05	6551.18	8796.66		1.863e-05	7038.45	9182.66		1.863e-05	6438.73	8041.15		1.863e-05	6141.6	7975.58
							2.095e-05	6053.42	5142.93		2.095e-05	6522.25	5986.65		2.095e-05	4869.41	6463.36		2.095e-05	4957.77	6269.1		2.095e-05	6232.43	8489.56		2.095e-05	5368.09	7193.25		2.095e-05	6824.8	6467.06		2.095e-05	6865.58	8484.24		2.095e-05	6960.94	8814.11		2.095e-05	5859.54	7431.97		2.095e-05	6724.54	8738.74
							2.328e-05	5679.89	4474.63		2.328e-05	6679.55	5905.6		2.328e-05	5522.51	7351.07		2.328e-05	5287.32	6368.84		2.328e-05	5727.44	8006.89		2.328e-05	5455.06	6229.64		2.328e-05	6624.23	6343.27		2.328e-05	6208.34	7204.22		2.328e-05	6179.03	7341.65		2.328e-05	5595.95	6998.06		2.328e-05	6529.25	8764.42
							2.561e-05	5432.4	4215.93		2.561e-05	6395.04	5449.73		2.561e-05	5460.02	7239.05		2.561e-05	5847.91	7234.52		2.561e-05	5093.08	6985.18		2.561e-05	5228.79	6140.17		2.561e-05	6564.25	6468.5		2.561e-05	5770.1	6626.13		2.561e-05	5872.9	6852.18		2.561e-05	5543.69	6708.27		2.561e-05	6876.83	9304.04
							2.794e-05	5501.33	4172.29		2.794e-05	6056.8	5057.66		2.794e-05	5472.6	7363.32		2.794e-05	5614.77	6627.16		2.794e-05	4457.78	5234.6		2.794e-05	4960.05	5636.67		2.794e-05	6507.29	6899.31		2.794e-05	5633.44	7432.31		2.794e-05	6253.63	7081.75		2.794e-05	5625.02	6495.02		2.794e-05	6595.75	9494.04
							3.027e-05	5469.68	4089.61		3.027e-05	6051.21	4990		3.027e-05	5164.08	7323.24		3.027e-05	5669.55	7027.43		3.027e-05	4195.07	5005.62		3.027e-05	4182.26	4900.48		3.027e-05	6420.53	6623.12		3.027e-05	5573.49	7074.23		3.027e-05	6599.45	7341.29		3.027e-05	5501.64	6068.16		3.027e-05	6229.28	9321.18
							3.26e-05	4954.24	3920.73		3.26e-05	6922.44	6463.86		3.26e-05	5376.93	7134.12		3.26e-05	6036.1	6913.32		3.26e-05	4086.06	4971.52		3.26e-05	4386.39	5659.54		3.26e-05	6417.23	5470.38		3.26e-05	5880.14	7614.77		3.26e-05	6424.73	8068.62		3.26e-05	5430.48	5890.56		3.26e-05	5890.25	8600.98
							3.492e-05	5171.21	3955.26		3.492e-05	7670.16	7830.56		3.492e-05	5813.83	7543.81		3.492e-05	6189.08	7559.66		3.492e-05	4642.84	5793.62		3.492e-05	4376.05	5478.17		3.492e-05	6463.9	5502.13		3.492e-05	6605.46	7886.88		3.492e-05	6800.12	8714.89		3.492e-05	6150.09	6561.37		3.492e-05	6121.72	8497.16
							3.725e-05	4847.39	4031.83		3.725e-05	8510.53	9284.47		3.725e-05	6170.14	7602.41		3.725e-05	6122.53	7294.71		3.725e-05	5555	6984		3.725e-05	3988.79	5075.55		3.725e-05	6406.23	5651.31		3.725e-05	6650.48	7651.99		3.725e-05	6761.08	8108.42		3.725e-05	6435.94	7275.62		3.725e-05	6475.44	9207.17
							3.958e-05	4826.12	3702.26		3.958e-05	8909.5	9560.54		3.958e-05	5814.36	7152.14		3.958e-05	5649.12	6361.85		3.958e-05	5578.15	7052.38		3.958e-05	4339.88	6357.94		3.958e-05	5905.79	5597.06		3.958e-05	6451.96	7609.94		3.958e-05	6054.14	7321.04		3.958e-05	6873.99	7917.19		3.958e-05	5959.41	9029.68
							4.191e-05	5573.46	4555.2		4.191e-05	8753.34	9699.66		4.191e-05	5594.65	7085.33		4.191e-05	5782.12	6268.18		4.191e-05	5666.58	6456.48		4.191e-05	4635.99	7974.89		4.191e-05	5369.1	5438.76		4.191e-05	6580	7993		4.191e-05	6126.46	7141.53		4.191e-05	6073.23	8080.1		4.191e-05	6457.48	8554.78
							4.424e-05	5665.31	5393.39		4.424e-05	8568.71	9963.52		4.424e-05	5350.02	6868.12		4.424e-05	6319.58	6833.69		4.424e-05	5781.19	6510.07		4.424e-05	5192.65	8073.28		4.424e-05	5590.78	5716.78		4.424e-05	6292.72	7343.28		4.424e-05	6063.51	6772.69		4.424e-05	5465.13	7195.43		4.424e-05	6295.31	7432.41
							4.657e-05	5777.86	5582.26		4.657e-05	8900.9	10963.7		4.657e-05	5304.48	6750.06		4.657e-05	6147.7	6831.13		4.657e-05	6327.08	6814.68		4.657e-05	5526.79	8169.97		4.657e-05	6273.75	7142.63		4.657e-05	5717.55	6719		4.657e-05	5728.19	6300.36		4.657e-05	5417.19	6886.92		4.657e-05	5701.13	6659.56
							4.889e-05	6090.5	5832.06		4.889e-05	8713.17	10955.5		4.889e-05	5392.75	6508.6		4.889e-05	5263.55	6081.81		4.889e-05	6332.53	6983.45		4.889e-05	5040.79	7308.41		4.889e-05	6309.99	8040.69		4.889e-05	5524.34	6345.99		4.889e-05	5249.77	5846.98		4.889e-05	5602.35	7003.73		4.889e-05	6093.39	7423.56
							5.122e-05	6957.45	6977.17		5.122e-05	9535.68	11325.4		5.122e-05	5550.71	7109.31		5.122e-05	4801.05	5469.06		5.122e-05	6155.04	6730.94		5.122e-05	4562.1	6495.04		5.122e-05	6312.03	7594.33		5.122e-05	5499.1	6374.89		5.122e-05	5870.08	6106.56		5.122e-05	5671.04	7008.4		5.122e-05	6535.73	8304.3
							5.355e-05	7865.33	9169.79		5.355e-05	8173.52	10528		5.355e-05	5699.25	8141.27		5.355e-05	4525.09	4842.28		5.355e-05	5646.2	6785.89		5.355e-05	4700	6840.72		5.355e-05	6220.29	6903.59		5.355e-05	5806.31	7087.46		5.355e-05	6160.11	6470.6		5.355e-05	5656.89	7177.62		5.355e-05	6421.59	8419.53
							5.588e-05	7743.01	10237.2		5.588e-05	8020.77	10033.8						5.588e-05	4707.4	4708.29		5.588e-05	5378.26	6398.7		5.588e-05	4573.76	6423.24		5.588e-05	5591.68	6600.91		5.588e-05	6017.83	7595.79		5.588e-05	6332	6607.88		5.588e-05	5393.06	6616.96		5.588e-05	6189.91	8215.96
							5.821e-05	7489.16	9720.44		5.821e-05	8271.85	10281.6										5.821e-05	5447.64	6277.66		5.821e-05	4233.4	5568.33		5.821e-05	5866.13	7520.76		5.821e-05	6642.82	7778.43		5.821e-05	6723.39	6862.86		5.821e-05	5186.45	6400.88		5.821e-05	6510.89	8245.96
							6.054e-05	7644.32	9290.23		6.054e-05	8821.56	11230.2										6.054e-05	5677	6790		6.054e-05	4186.28	5374.17		6.054e-05	5975.61	8329.7		6.054e-05	6517.76	7483.77		6.054e-05	6780.96	7201.89		6.054e-05	5165.08	6589.68		6.054e-05	5802.47	7416.21
							6.286e-05	7581.36	8895.12		6.286e-05	8572.55	10528.7										6.286e-05	6055	7342		6.286e-05	4247.8	5424.85		6.286e-05	6584.6	8811.31		6.286e-05	6501.85	7089.53		6.286e-05	6996.04	7860.88		6.286e-05	6111.25	7214.09		6.286e-05	5935.55	7789.14
							6.519e-05	7589.87	9061.16		6.519e-05	8826.4	10157														6.519e-05	4576.82	5604.63		6.519e-05	6569.63	7953.82						6.519e-05	6476.68	8211.16		6.519e-05	6767.96	7658.56		6.519e-05	6010.02	8215.44
							6.752e-05	7914.99	9446.75		6.752e-05	8897.2	10021														6.752e-05	4792.71	6094.33		6.752e-05	6320.76	7492.52														6.752e-05	6263.95	8376.01
							6.985e-05	7862.68	9764.02		6.985e-05	9238.05	10359.9																		6.985e-05	6426.54	7430.58														6.985e-05	6442.81	8343.28
							7.218e-05	7514	9879.98																						7.218e-05	7466.51	8398.83														7.218e-05	6846.09	8363.28
																																															7.451e-05	6804.72	8818.26
																																															7.683e-05	7332.41	8858.45
																																															7.916e-05	6793.83	7924.76
																																															8.149e-05	6125.64	7580.97
																																															8.382e-05	6427.41	8084.4
																																															8.615e-05	6867.49	9157.77
																																															8.848e-05	6837.99	9885.24
																																															9.08e-05	6923.75	8600.28
																																															9.313e-05	6352.53	8482.8
																																															9.546e-05	5860.66	7683.59

## Sheet: Aged_Nup170_N84
	File					File	250420_NupNup_TR86.3.4_FL_1_MMStack_Pos21cell1age18				250420_NupNup_TR86.3.4_FL_1_MMStack_Pos22cell1age18				250420_NupNup_TR86.3.4_FL_1_MMStack_Pos22cell2age17				250420_NupNup_TR86.3.4_FL_1_MMStack_Pos22cell4age6			250420_NupNup_TR86.3.4_FL_1_MMStack_Pos23cell1age16					250420_NupNup_TR86.3.4_FL_1_MMStack_Pos24cell1age21				250420_NupNup_TR86.3.4_FL_1_MMStack_Pos24cell2age14				250420_NupNup_TR86.3.4_FL_1_MMStack_Pos24cell3age14				250420_NupNup_TR86.3.4_FL_1_MMStack_Pos25cell1age15				250420_NupNup_TR86.3.4_FL_1_MMStack_Pos25cell2age15				250420_NupNup_TR86.3.4_FL_1_MMStack_Pos25cell7age8
	protein	Nup170-GFP				protein	Nup170-GFP				Nup170-GFP				Nup170-GFP				Nup170-GFP				Nup170-GFP				Nup170-GFP				Nup170-GFP				Nup170-GFP				Nup170-GFP				Nup170-GFP				Nup170-GFP
						cluster																	0				0				1				1				1				0				0
	Cells	17				Cell	1				1				2				4				1				1				2				3				1				2				7
	Age	15.5294				Age	18				18				17				6				16				21				14				14				15				15				8
	correlation	0.82292				correlation	0.897303				0.981045				0.83469				0.725226				0.913841				0.932175				0.891612				0.891612				0.613179				0.791276				0.844199
	GFP	6270.94				GFP	6725.87				6054.97				4714.36				4703.18				6960.28				5021.37				5182.25				5182.25				5955.78				5115.97				7383.16
	stdev	826.113				stdev	1886.58				1702.07				495.332				574.576				896.472				795.488				692.655				692.655				603.892				663.055				930.157
	mCh	8204.97				mCh	9209.08				6620.62				6426.57				7365.95				7614.91				6165.33				7316.82				7316.82				7580.96				6309.86				12850.1
	stdev	1456				stdev	2921.44				2264.6				1099.43				991.011				1375.47				1276.43				1570.76				1570.76				1136.17				1064.83				2395.83
						1	0	5897	7863		0	4702	5117		0	4058	5369		0	5178	8784		0	6473	6673		0	5308	7238		0	4442	5543		0	4442	5543		0	5891	8540		0	4845	4782		0	7318	10643
						2	2.328e-06	6472.1	8487.38		2.328e-06	4875.31	5334.29		2.328e-06	4024.47	5100.52		2.328e-06	4946.75	8492.15		2.328e-06	6393	7300.8		2.328e-06	4799.34	5685.99		2.328e-06	5177.9	5400.84		2.328e-06	5177.9	5400.84		2.328e-06	6200.88	8604.89		2.328e-06	4995.03	5640.96		2.328e-06	7731	12229.5
						3	4.657e-06	6485	7976.4		4.657e-06	5039.78	5674.13		4.657e-06	3885.12	4407.02		4.657e-06	4722.65	8824.12		4.657e-06	6571.13	7738.73		4.657e-06	4630	5397.69		4.657e-06	5095.08	5210.63		4.657e-06	5095.08	5210.63		4.657e-06	6773.8	8491.59		4.657e-06	4981.3	6342.95		4.657e-06	7856.02	13691.8
						4	6.985e-06	6023.38	7460.41		6.985e-06	5109.8	6365.62		6.985e-06	4037.18	4752.87		6.985e-06	4965.34	8537.96		6.985e-06	6641.92	7642.89		6.985e-06	4547.38	5438.24		6.985e-06	4875.81	5611.45		6.985e-06	4875.81	5611.45		6.985e-06	7241.66	7933.33		6.985e-06	4867.26	6101.42		6.985e-06	7689.64	14959.8
						5	9.313e-06	5937.83	7955.55		9.313e-06	5438.82	6536.84		9.313e-06	4230.3	4950.07		9.313e-06	5155.37	8358.4		9.313e-06	6736.73	7482.23		9.313e-06	4701.19	5422.07		9.313e-06	4750.66	6103.91		9.313e-06	4750.66	6103.91		9.313e-06	6107.73	7575.18		9.313e-06	4684.32	5517.54		9.313e-06	6321.04	12388.7
						6	1.164e-05	6030.87	7979.82		1.164e-05	5626.74	6090.45		1.164e-05	4289.76	5257.09		1.164e-05	4487.41	8125.2		1.164e-05	7234.43	8100.51		1.164e-05	4732.87	5552.9		1.164e-05	4679.34	6179.38		1.164e-05	4679.34	6179.38		1.164e-05	5724.59	7567.98		1.164e-05	4664.35	5280.07		1.164e-05	5486.93	9930.95
						7	1.397e-05	6123.09	8429.62		1.397e-05	5892.11	6025.98		1.397e-05	4487.26	5866.3		1.397e-05	4265.08	7432.78		1.397e-05	9000.69	9978.7		1.397e-05	4677.48	5846.87		1.397e-05	4752.06	5713.38		1.397e-05	4752.06	5713.38		1.397e-05	5763.61	6780.23		1.397e-05	4605.14	6080.48		1.397e-05	5812.43	9561.61
						8	1.63e-05	6334.75	8770.38		1.63e-05	5979.07	6209.48		1.63e-05	4674	6235.4		1.63e-05	3906.11	6871.22		1.63e-05	7905.81	10052.9		1.63e-05	4547.88	5389.6		1.63e-05	4558.3	5622.24		1.63e-05	4558.3	5622.24		1.63e-05	6051.8	6752.06		1.63e-05	4511.33	5827.53		1.63e-05	5959.79	9450.21
						9	1.863e-05	6465.38	8477.99		1.863e-05	6037.54	6057.56		1.863e-05	4479.02	6813.44		1.863e-05	3970.21	7268.36		1.863e-05	8290.96	9960.28		1.863e-05	4627.24	5026.96		1.863e-05	4642.48	6161.22		1.863e-05	4642.48	6161.22		1.863e-05	6553.72	7311.93		1.863e-05	4391.48	5582.27		1.863e-05	6443.67	10569.7
						10	2.095e-05	6377.28	7801.16		2.095e-05	5755.75	6098.55		2.095e-05	4527.93	6878.99		2.095e-05	4322.75	7712.22		2.095e-05	8593.76	9327.76		2.095e-05	4736.08	5046.08		2.095e-05	4882.75	7042.55		2.095e-05	4882.75	7042.55		2.095e-05	6560.99	8727.6		2.095e-05	4164.09	5247.62		2.095e-05	6878.8	12122.1
						11	2.328e-05	6445.6	7161.32		2.328e-05	5997.83	6617.35		2.328e-05	4669.04	6795.3		2.328e-05	4303.2	7773.6		2.328e-05	8655.36	8853.72		2.328e-05	4749.72	5321.18		2.328e-05	5303	7809.54		2.328e-05	5303	7809.54		2.328e-05	5996.8	8097.8		2.328e-05	4255.66	5051.31		2.328e-05	7294.31	13473.4
						12	2.561e-05	6083.62	6286.93		2.561e-05	6419.94	6972.89		2.561e-05	4690.13	7184.27		2.561e-05	4644.39	7724.44		2.561e-05	8414.28	8622.12		2.561e-05	4857.33	5988.41		2.561e-05	5790.09	8615.83		2.561e-05	5790.09	8615.83		2.561e-05	6242	7090.2		2.561e-05	4520.09	5135.36		2.561e-05	8098.69	14385
						13	2.794e-05	5977.58	6434.71		2.794e-05	6978.1	7754.38		2.794e-05	4614.01	6227.36		2.794e-05	4740.68	8150.88		2.794e-05	8021	8434.36		2.794e-05	5145.79	6109.8		2.794e-05	6143.33	9847.89		2.794e-05	6143.33	9847.89		2.794e-05	6343.8	7005		2.794e-05	4614.69	5598.14		2.794e-05	8264.65	14834.9
						14	3.027e-05	6487.98	7497.38		3.027e-05	7446.21	8016.31		3.027e-05	4435.28	6275.8		3.027e-05	5585.41	8853.36		3.027e-05	7485	7941.92		3.027e-05	5024.13	5982.93		3.027e-05	6640.64	9729.52		3.027e-05	6640.64	9729.52		3.027e-05	5168.04	6056.86		3.027e-05	4869.96	6280.25		3.027e-05	8416.84	15547.4
						15	3.26e-05	7456.65	8176.67		3.26e-05	7664.73	8045.73		3.26e-05	4488.92	6228.32		3.26e-05	6542.65	9140.16		3.26e-05	7017.97	7624.77		3.26e-05	5014.34	5926.41		3.26e-05	6739	10620.5		3.26e-05	6739	10620.5		3.26e-05	4917.62	5383.34		3.26e-05	5121.45	6644.94		3.26e-05	8276.58	15181.4
						16	3.492e-05	8475.32	10677.6		3.492e-05	8236.76	9439.54		3.492e-05	4467.24	6085.83		3.492e-05	6156.34	9007.93		3.492e-05	6901.08	7494.01		3.492e-05	4842.08	5790.71		3.492e-05	6625.48	10547		3.492e-05	6625.48	10547		3.492e-05	4596.46	5295.52		3.492e-05	5362.77	7373.19		3.492e-05	8124.59	16133.2
						17	3.725e-05	9378.45	13701.3		3.725e-05	8593.63	11229		3.725e-05	4587.19	6054.83		3.725e-05	5605.95	8308.43		3.725e-05	7077.75	7468.89		3.725e-05	4797.08	6212.37		3.725e-05	6542.77	10024.4		3.725e-05	6542.77	10024.4		3.725e-05	4557.66	4872.6		3.725e-05	5556.74	7714.64		3.725e-05	7859.67	15772.3
						18	3.958e-05	9742.02	14417.3		3.958e-05	9312.62	11342.1		3.958e-05	4676.34	5496.1		3.958e-05	5113.37	7474.91		3.958e-05	7447.3	8049.23		3.958e-05	5309.11	6536.74		3.958e-05	6049.72	9647.41		3.958e-05	6049.72	9647.41		3.958e-05	4612.23	6312.69		3.958e-05	5888.04	8060.02		3.958e-05	8050.39	16087
						19	4.191e-05	10454.5	13155.6		4.191e-05	9485.88	11110.8		4.191e-05	5024.92	5663.06		4.191e-05	4792.75	6737.08		4.191e-05	7633.51	8786.38		4.191e-05	5425.45	6532.69		4.191e-05	5904.26	8984.93		4.191e-05	5904.26	8984.93		4.191e-05	6571.36	9448.19		4.191e-05	5931.63	8317.72		4.191e-05	8244.47	16684.9
						20	4.424e-05	11749	13629.2		4.424e-05	9554.36	10916.5		4.424e-05	5217.76	6301.66		4.424e-05	4610.59	6415.81		4.424e-05	7872.24	9235.93		4.424e-05	5325.83	6326.28		4.424e-05	5467.61	8526.28		4.424e-05	5467.61	8526.28		4.424e-05	7558.67	10139.1		4.424e-05	6254	8062		4.424e-05	8734.6	14054.6
						21	4.657e-05	11278.9	15767.8		4.657e-05	8959.24	10550.4		4.657e-05	5177.96	7563.63		4.657e-05	4558.48	6220.28		4.657e-05	7706.44	8869.82		4.657e-05	5255.49	6289.76		4.657e-05	5034.21	8023.66		4.657e-05	5034.21	8023.66		4.657e-05	7468.78	9345.65		4.657e-05	6350	8633		4.657e-05	8383.6	13306.5
						22	4.889e-05	10319.7	16386.1		4.889e-05	7316.24	8018.99		4.889e-05	5354.57	8358.14		4.889e-05	4409.01	6127.52		4.889e-05	7497.95	8651.92		4.889e-05	5938.67	6837.87		4.889e-05	4626.47	7060.39		4.889e-05	4626.47	7060.39		4.889e-05	6767.48	9227.94		4.889e-05	6189	8268		4.889e-05	8023.12	12670
						23	5.122e-05	8127.29	14397.4		5.122e-05	6144.87	5858.3		5.122e-05	5445.73	7961.13		5.122e-05	4333	6176.33		5.122e-05	7514.7	8545.54		5.122e-05	6385.77	8356.35		5.122e-05	4539.22	6190.5		5.122e-05	4539.22	6190.5		5.122e-05	6062.68	8838.65		5.122e-05	6710	7833		5.122e-05	6867.56	10856.4
						24	5.355e-05	7893.02	13926		5.355e-05	5394.93	5200.34		5.355e-05	5224.64	8534.85		5.355e-05	4234.42	6607.93		5.355e-05	7806.52	9201.88		5.355e-05	6706.04	9365.3		5.355e-05	4761.5	6605.4		5.355e-05	4761.5	6605.4		5.355e-05	5846.04	8274.2		5.355e-05	5850.85	6883.8		5.355e-05	5840.8	9193.2
						25	5.588e-05	6963.62	11312.2		5.588e-05	4790.13	4868.1		5.588e-05	5555.24	8330.23		5.588e-05	4482.88	7251.99		5.588e-05	8017.36	9811.66		5.588e-05	6884.81	9424.39		5.588e-05	5016.87	6300.36		5.588e-05	5016.87	6300.36		5.588e-05	6108.44	8503.06		5.588e-05	5743.09	6159.45		5.588e-05	6187.75	9597.68
						26	5.821e-05	6063.45	9573.15		5.821e-05	4347.85	4308.25		5.821e-05	5599.52	7173.35		5.821e-05	4865.49	7622.41		5.821e-05	7835.3	9860.23		5.821e-05	7660.05	9418.97		5.821e-05	5202.03	6673.7		5.821e-05	5202.03	6673.7		5.821e-05	6358.97	8826.92		5.821e-05	5746.17	5972.99		5.821e-05	6744.7	9714.33
						27	6.054e-05	5902.55	8698.3		6.054e-05	4303.46	4417.35		6.054e-05	5510.63	7455.94		6.054e-05	4718.4	7087.04		6.054e-05	7360.53	9388.07		6.054e-05	8138.88	10924.6		6.054e-05	5419.46	7698.93		6.054e-05	5419.46	7698.93		6.054e-05	6148.85	8322.95		6.054e-05	5529.27	5715.18		6.054e-05	7360.34	11063.9
						28	6.286e-05	6004.74	8762.83		6.286e-05	4321.09	4391.73		6.286e-05	4900.86	6857.47		6.286e-05	4343.07	6654.67		6.286e-05	6971.25	7971.72		6.286e-05	6342.83	9355.25		6.286e-05	5162.4	7536.15		6.286e-05	5162.4	7536.15		6.286e-05	6165.49	8502.88		6.286e-05	5405.09	5686.61		6.286e-05	7874.41	13076.4
						29	6.519e-05	5746.38	8024.56		6.519e-05	4361.02	4109.59		6.519e-05	4383.42	6192.45		6.519e-05	4114.66	6321.27		6.519e-05	6188.96	6996.39		6.519e-05	5571.2	7695.15		6.519e-05	4857.17	7470.47		6.519e-05	4857.17	7470.47		6.519e-05	6631.14	8683.46		6.519e-05	5361.61	6274.76		6.519e-05	7967.25	15472.9
						30	6.752e-05	5320.96	7664.14		6.752e-05	4201.1	4186.49						6.752e-05	3957.7	6094.77		6.752e-05	5945.05	6486.03		6.752e-05	5025.19	7070.27		6.752e-05	4570.99	6730.11		6.752e-05	4570.99	6730.11		6.752e-05	6728.05	9096.15		6.752e-05	5403.94	6274.34
						31	6.985e-05	5574.7	7187.4		6.985e-05	4226.28	4561.21						6.985e-05	4170.21	5794.23		6.985e-05	6056.28	6791.59		6.985e-05	4399.06	6659.4		6.985e-05	4593.66	6389.13		6.985e-05	4593.66	6389.13		6.985e-05	6051.33	8589.97		6.985e-05	5283.02	6244.4
						32	7.218e-05	5262.06	8286.53		7.218e-05	4475.09	4647.54						7.218e-05	4423.13	5979.75		7.218e-05	6338.49	7348.77		7.218e-05	4262.5	5677.24		7.218e-05	4651.26	6258.81		7.218e-05	4651.26	6258.81		7.218e-05	5232.08	7800.79		7.218e-05	5001.28	5699.64
						33	7.451e-05	4372.1	6859.82		7.451e-05	4398.36	4559.34						7.451e-05	4276.98	6306.03		7.451e-05	6406.09	6901.47		7.451e-05	4455.55	5312.87		7.451e-05	4814.8	6355.6		7.451e-05	4814.8	6355.6		7.451e-05	5402.84	8065.08		7.451e-05	5058.18	5488.99
						34	7.683e-05	4643.54	6688.17		7.683e-05	4482.22	4468.98						7.683e-05	4417.27	6359.4		7.683e-05	5908.84	6156.28		7.683e-05	4634.68	5333.65		7.683e-05	4655.4	6791.4		7.683e-05	4655.4	6791.4		7.683e-05	5728.63	8560.27		7.683e-05	5052.83	5876.27
						35	7.916e-05	4667.33	6851.57										7.916e-05	4786.56	6698.4		7.916e-05	5621.28	5773.74		7.916e-05	4574.55	5226.54		7.916e-05	4411	7062.2		7.916e-05	4411	7062.2		7.916e-05	6049.35	8763.7		7.916e-05	4902.08	6260.09
						36	8.149e-05	4560.74	6638.19										8.149e-05	4933.41	7340.11		8.149e-05	5780.82	6174		8.149e-05	4400.83	5244.63										8.149e-05	6376.93	9011.85		8.149e-05	5122.46	7082.92
						37	8.382e-05	4876.85	6422.26										8.382e-05	4977.95	7904.97		8.382e-05	6198.48	6696.78		8.382e-05	4917.39	6054.03										8.382e-05	6436.46	9508.38		8.382e-05	5280.66	8060.3
						38	8.615e-05	5260.59	6593.25														8.615e-05	6585.74	6474.44		8.615e-05	5548.03	6363.26										8.615e-05	6120.97	9591.15		8.615e-05	5462.53	7535.52
						39	8.848e-05	5072.84	6774.68														8.848e-05	6361.58	5738.76		8.848e-05	5823.23	6613.31										8.848e-05	5508.24	8823.16		8.848e-05	6101.85	7834.32
																							9.08e-05	5737.29	5659.79		9.08e-05	5357.64	6823.59										9.08e-05	5113.79	7805.7		9.08e-05	5844.49	7040.85
																							9.313e-05	5698.03	5244.06		9.313e-05	4822	6009.75										9.313e-05	5246.94	7484.79		9.313e-05	4942.37	5941.24
																							9.546e-05	5519.64	5247.35		9.546e-05	4714.08	5692.83										9.546e-05	5442.66	7486.55		9.546e-05	4637.34	5181.71
																							9.779e-05	6190.71	5526.39		9.779e-05	4546.86	5207.19										9.779e-05	5413.23	7376.3		9.779e-05	4395.5	5352.74
																							0.0001001	6305.88	6007.52		0.0001001	4048.21	4848.11										0.0001001	5477.52	7588.19		0.0001001	4182.9	5916.22
																							0.0001024	6308.33	6488.03		0.0001024	4066.03	4874.9										0.0001024	5589.34	7472.23		0.0001024	4095.43	6012.14
																							0.0001048	6686.1	6754.12		0.0001048	4079.18	4901.7										0.0001048	5207.33	6976.89		0.0001048	3841.76	5412.41
																							0.0001071	6711.68	6904.15		0.0001071	4034.99	4966.88										0.0001071	5441.6	6814.94		0.0001071	4329.68	4816
																							0.0001094	6467.19	7076.21		0.0001094	4246.22	5193.6										0.0001094	5579.98	7701.07		0.0001094	4658.92	4776.15
																											0.0001118	4342.89	5664.52										0.0001118	5773.82	7457.66
																											0.0001141	4739.3	6440.59										0.0001141	5879.16	6791.8
																											0.0001164	4936.69	6833.69										0.0001164	5618.44	6754.72
																											0.0001187	4934.87	6026.85										0.0001187	5467.6	7356.76
																											0.0001211	4907.94	5631.28										0.0001211	6266.8	7329.48
																											0.0001234	4627.07	5278.9										0.0001234	6482.32	6939.24
																											0.0001257	4655.21	5227.69										0.0001257	5532.26	6726.36
																											0.0001281	4744.22	5284.96										0.0001281	5606.01	7229.83
																											0.0001304	4861.72	5573										0.0001304	6146.44	7585.08
																											0.0001327	4810.94	5559.62										0.0001327	6420.83	7525
																											0.000135	4759.92	5360.94										0.000135	6566.12	7289.99
																											0.0001374	4840.96	5398.54										0.0001374	6091.59	7135.48
																											0.0001397	4832.36	5632.62										0.0001397	5933.96	7320.08
																											0.000142	4692.46	5824.28										0.000142	6157.57	7892.43
																																							0.0001444	6607.82	7122.41
																																							0.0001467	6338.73	5792.73
																																							0.000149	5736.12	5728.9
																																							0.0001513	5452.7	5806.98
																																							0.0001537	5803.8	6134.45
																																							0.000156	6356.8	6649.64
																																							0.0001583	6084.25	7060.44
																																							0.0001607	6210.99	7907.39
																																							0.000163	6197.42	7380.83
																																							0.0001653	5726.49	6214.77
																																							0.0001676	5174.42	5248.8

## Sheet: Young_Mlp1_N84
	File					File	250503_NupNup_TR86.3.1_4.1_Fl__1_MMStack_Pos21cell1age1				250503_NupNup_TR86.3.1_4.1_Fl__1_MMStack_Pos21cell2age2				250503_NupNup_TR86.3.1_4.1_Fl__1_MMStack_Pos22cell2age2				250503_NupNup_TR86.3.1_4.1_Fl__1_MMStack_Pos23cell1age2				250503_NupNup_TR86.3.1_4.1_Fl__1_MMStack_Pos23cell3age1				250503_NupNup_TR86.3.1_4.1_Fl__1_MMStack_Pos23cell4age1				250503_NupNup_TR86.3.1_4.1_Fl__1_MMStack_Pos23cell5age2				250503_NupNup_TR86.3.1_4.1_Fl__1_MMStack_Pos24cell1age1				250503_NupNup_TR86.3.1_4.1_Fl__1_MMStack_Pos25cell1age0				250503_NupNup_TR86.3.1_4.1_Fl__1_MMStack_Pos25cell4age1				250503_NupNup_TR86.3.1_4.1_Fl__1_MMStack_Pos25cell7age1
	protein	Mlp1-GFP				protein	Mlp1-GFP				Mlp1-GFP				Mlp1-GFP				Mlp1-GFP				Mlp1-GFP				Mlp1-GFP				Mlp1-GFP				Mlp1-GFP				Mlp1-GFP				Mlp1-GFP				Mlp1-GFP
	Cells	19				Cell	1				2				2				1				3				4				5				1				1				4				7
	visible cluster	0				cluster	0				0				0				0				0				0				0				0				0				0				0
	Age	2.89474				Age	1				2				2				2				1				1				2				1				0				1				1
	correlation	0.621171				correlation	0.881658				0.490247				0.712322				0.336169				0.77764				0.891409				0.498129				0.528547				0.48443				0.28046				0.558321
	GFP	5927.2				GFP	5750.51				5572.6				5400.95				5916.07				6335.53				6063.84				5958.44				6788.1				6311.33				6592.85				6565.75
	stdev	829.511				stdev	785.249				841.77				742.295				708.43				1096.9				785.742				642.517				1173.04				731.838				750.514				778.931
	mCh	7370.9				mCh	5844.8				7451.73				7049.67				6518.67				8299.18				7235.61				7821.17				8016.43				7981.2				7555.15				7747.37
	stdev	828.194				stdev	662.264				891.891				628.829				724.412				902.433				1022.55				581.42				901.838				761.567				503.686				727.393
							0	7167	6316		0	4184	6526		0	5110	6071		0	7156	6258		0	5764	9021		0	7094	8146		0	5229	8155		0	6623	9838		0	7870	10029		0	5396	7582		0	6038	7556
							1	7748.99	7140.48		1	4678.18	7443.3		1	5286.99	6880.73		1	6362	7514		1	6954.16	8308.86		1	6971.91	7563.65		1	5420.18	7984.01		1	7078	9101		1	6869	9598		1	6914	7805		1	6243.61	7888.82
							2	6865.53	6857.3		2	5750.65	8223.21		2	5637.55	7373.23		2	6750	7358		2	7843.01	9128.4		2	7071.24	7822.77		2	5620.49	7497.57		2	8649.8	9517.51		2	5816	8462		2	7212	7548		2	5981.42	7833.55
							3	6370.85	6862.75		3	6580.99	8686.52		3	5843.5	7681.23		3	6449	8188		3	9109.73	9670.97		3	6957.6	7612.25		3	6090.14	7749.73		3	7997.48	9426.43		3	5864	7834		3	7110.96	7655.38		3	6219.53	7590.86
							4	6700.68	6755.28		4	5667.63	8153.34		4	6266.33	7718.98		4	5490	7322		4	7881.94	9238.28		4	6163.51	7253.03		4	6281.41	8205.43		4	6805.31	8208.77		4	6576	7722		4	6904.81	8039.72		4	6691.93	7680.75
							5	6786.44	6524.84		5	6028.3	7998.03		5	6299.9	7703.63		5	5088.94	6276.62		5	7424.79	9406.43		5	5454.26	6566.1		5	6634.76	8373.05		5	7041.49	7388.5		5	7005	7781		5	8310.68	8258.42		5	7525.64	8086.03
							6	6575.64	6624.44		6	6363.08	7622.88		6	6736.01	7952.14		6	5229.22	6172.78		6	6995.49	9576.83		6	6003.18	6487.31		6	6419.83	8158.86		6	7274.17	7180.81		6	6417.2	7401.57		6	7447.92	8135.63		6	6179.54	7950.82
							7	6450.31	6236.42		7	5216.47	6667.47		7	6583.39	7915.19		7	5731.4	6540.38		7	6467.09	9000.86		7	6340.78	7122.68		7	6117.64	7559.72		7	6467.75	7337.99		7	6404.85	7178.14		7	6515.66	7459.99		7	5507.97	7103.6
							8	6305.09	6040.71		8	4311.52	6081.34		8	5887.29	7967.99		8	5225.66	6348.83		8	6177.5	8630.16		8	5941.29	7295.54		8	6318.25	7618.99		8	5555.89	7104.42		8	6339.08	7028.22		8	7390.01	6955.86		8	5704.69	7361.67
							9	6316.07	6133.97		9	4370.04	6189.28		9	4706.56	7461.53		9	5224.88	6338.01		9	5797.79	8007.8		9	5242.41	6940.08		9	6412.4	7959.32		9	5447.2	7250.32		9	6373.7	6873.6		9	7455.73	7011.84		9	6634.69	8195.21
							10	6489.15	6065.93		10	4245.16	6064.56		10	4343.72	6490.76		10	5111.62	6000.63		10	5206.31	7504.4		10	5200.2	6843.81		10	6678.78	8769.99		10	5466.62	7423.71		10	6783.22	7221.68		10	6592.61	7048.88		10	7789.72	9355.78
							11	6080.37	5914.35		11	4463.85	6366.72		11	4758.32	7128.44		11	5160.13	5931.29		11	4888.08	7436.39		11	5256.05	6407.3		11	6644.06	8593.99		11	5907.56	7635.08		11	7439.74	8084.94		11	6354.31	7137.41		11	8354.16	9952.03
							12	5927.88	6197.58		12	5084.87	6879.08		12	6159.2	7600.19		12	5206.01	5880.47		12	5051.03	7783.84		12	5364.18	5998.44		12	5516.31	7648.65		12	6772.48	8086.2		12	7048.59	8184.77		12	7380.42	8327.83		12	8264.32	9093.99
							13	5811.09	5730.35		13	6534.3	7576.58		13	5326.89	7535.68		13	5095.74	6102.66		13	6199.41	8238.41		13	4849.42	5641.18		13	5684.11	7556.69		13	7087.52	8461.72		13	6316.99	7871.53		13	6768.76	8341.7		13	7060.49	7403.41
							14	6125.38	5647.88		14	6405.36	7016.43		14	4920.45	7214.49		14	5040.77	6252.18		14	6136.78	9100.51		14	4737.04	5298.52		14	5668.71	7575.72		14	7606.08	8415.16		14	6413.68	8066.01		14	5832.77	7751.18		14	6055.78	7144.4
							15	6435.32	5980.12		15	6821.68	6759.89		15	5480.02	7462.32		15	5394.38	7284.68		15	6864.24	8823.8		15	4901.7	5557.82		15	6031.32	7883.22		15	7931.72	8322.73		15	6306.21	8291.24		15	6459.85	8219.66		15	6215.35	7588.32
							16	5897.59	6243.01		16	6820.01	6630.19		16	5286.23	6720.92		16	6409.64	7934.62		16	6835.88	7639.28		16	5124.21	6182.2		16	6574.35	9202.21		16	7147.32	8305.44		16	6273.13	7780.07		16	5685.72	8066.75		16	6106.39	7391.94
							17	5824.73	6397.97		17	5800.98	6484.6		17	5785.51	6578.71		17	6255.24	7114.58		17	5753.39	6931.41		17	5760.46	6714.67		17	6640.09	8493.54		17	6170.38	8131.19		17	6436.29	7415.05		17	5287.89	7702.27		17	6771.56	7522.32
							18	5493.69	5887.95		18	5560.17	6463.05		18	6736.34	7377.66		18	5797.27	6930.34		18	5261.61	6904.95		18	6331.31	7581.69		18	7071.41	7806.26		18	5133.16	8076.82		18	6019.91	7615.65		18	5622.33	7159.86		18	7389.1	7651.7
							19	5190.48	5468.52		19	6665.87	7758.31		19	6380.11	7262.1		19	5768.1	6172.85		19	5098.84	6852.58		19	6661.98	8030.91		19	6872.44	7147.17		19	5294.25	7912.18		19	5179.04	7355.96		19	6572.26	7121.8		19	7527.7	7067.88
							20	4964.52	5041.36		20	7399.13	9176.08		20	5381.04	6661.35		20	6239.67	6180.04		20	4973.54	7119.89		20	6699.89	8573.78		20	6141.68	7085.65		20	5647.83	6791.49		20	4883.15	7554.11		20	6657	7304		20	6453.23	6637.38
							21	4986.96	5129.41		21	5854.54	8734.42		21	4672.51	6465.27		21	7372.3	6903.55		21	5846.48	8052.57		21	6593.59	8718.74		21	5373.1	6956.22		21	5241.06	6007.15		21	5088.51	7920.75		21	6467.6	6896.95		21	6778.62	6925.62
							22	5464.67	5883.61		22	5181.63	8307.77		22	4396.99	6031.62		22	7218	6485.1		22	7186.08	8503.54		22	7039.4	8786.65		22	5181.08	6834.3		22	6092.7	6888.89		22	5281.83	8186.98		22	5643.35	6597.14		22	7003.9	7011.71
							23	5292.05	6305.52		23	5199.09	8516.33		23	4275.98	5989.3		23	6241.95	5608.75						23	6861.46	8426.44		23	4981.86	7133.22		23	7805.86	8032.04		23	5549.39	7726.15		23	5965.14	7212.31		23	6422.27	7592.34
							24	5707.65	6451.13		24	5142.91	8764.2		24	4665.33	5893.18		24	5795.5	5211.63						24	6425.72	8341.6		24	4825.53	7189.61		24	9927.59	8144.81		24	5794.93	7767.45		24	6873.34	7539.21		24	5825.3	8379.22
							25	5964.9	6448.19		25	4861.78	7905.9		25	5130.19	6347.2		25	6085.49	5589.11						25	6613	8212.6		25	5021.26	7733.88		25	8147.94	8227.28		25	5936.3	7951.55						25	5477.53	7747.57
							26	6251.54	6201.11		26	5014.99	7171.53		26	5002.86	6804.65		26	6682.29	6803.22										26	5427.75	8299.69		26	6958.54	9227.92		26	7063.88	9308.08						26	5596.33	7142.97
							27	6240.11	6363.14		27	5244.02	7368.87		27	4911.91	6922.82		27	6068.8	5820.33																		27	7367.7	9264						27	6158.02	7688.83
							28	6317.86	6613.2		28	5402.09	7060.3		28	4656.37	7228.05																														28	6429.89	8128.92
							29	7239.12	6938.79		29	5118.8	6907.73
							6.985e-05	5122.98	5457.8		30	5155.24	7012.61
							7.218e-05	4870.5	5402.91		31	5801.3	7788.39
							7.451e-05	4984.77	5530.16		32	6533.79	8576.53
							7.683e-05	4937.02	5276.46		33	6005.87	8477.53
							7.916e-05	4884.38	4755.57
							8.149e-05	4861.09	4956.22
							8.382e-05	5062.09	5071.12
							8.615e-05	5124.94	5072.76
							8.848e-05	5338.96	5100.48
							9.08e-05	5027.51	5254.7
							9.313e-05	4745.98	5255.09
							9.546e-05	4795.37	5090.48
							9.779e-05	4839.88	4706.85
							0.0001001	4879.48	4975.15
							0.0001024	4988.6	5325.18
							0.0001048	5068.05	5228.42

## Sheet: Aged_Mlp1_N84
	File					File	250503_NupNup_TR86.3.1_4.1_Fl__1_MMStack_Pos21cell1age16				250503_NupNup_TR86.3.1_4.1_Fl__1_MMStack_Pos21cell3age15				250503_NupNup_TR86.3.1_4.1_Fl__1_MMStack_Pos21cell5age12				250503_NupNup_TR86.3.1_4.1_Fl__1_MMStack_Pos22cell1age12				250503_NupNup_TR86.3.1_4.1_Fl__1_MMStack_Pos23cell1age17				250503_NupNup_TR86.3.1_4.1_Fl__1_MMStack_Pos23cell2age19				250503_NupNup_TR86.3.1_4.1_Fl__1_MMStack_Pos24cell2age12								250503_NupNup_TR86.3.1_4.1_Fl__1_MMStack_Pos24cell4age9				250503_NupNup_TR86.3.1_4.1_Fl__1_MMStack_Pos24cell5age13				250503_NupNup_TR86.3.1_4.1_Fl__1_MMStack_Pos25cell1age14
	protein	Mlp1-GFP				protein	Mlp1-GFP				Mlp1-GFP				Mlp1-GFP				Mlp1-GFP				Mlp1-GFP				Mlp1-GFP				Mlp1-GFP				Mlp1-GFP	bud of cell, just before cell death			Mlp1-GFP				Mlp1-GFP				Mlp1-GFP
						cluster	1				1				1				0				1				1				1				1				1				1				1
	Cells	23				Cell	1				3				5				1				1				2				2				2				4				5				1
	Age	14.3043				Age	16				15				12				12				17				19				12				12				9				13				14
	correlation	0.361054				correlation	-0.0856497				0.46025				0.351501				0.49918				0.544123				0.377134				0.419538				-0.521249				0.235601				0.190829				0.427693
	GFP	5190.16				GFP	5513.08				6005.34				6805.13				6021.56				4813.44				4548.34				4550.68				4988.55				4177.36				4087.13				5906.68
	stdev	910.487				stdev	946.278				1372.74				985.106				1191.17				995.732				788.644				406.499				536.449				633.811				550.558				1054.55
	mCh	7890.66				mCh	7617				9620.22				10907.9				9628.89				7487.48				6926.71				5553.8				6875.72				5588.96				5612.7				8541.21
	stdev	1133.88				stdev	2240.31				1361.69				1259.82				931.19				1207.05				992.875				565.216				1836.87				520.671				417.842				1056.64
							0	4807	7121		0	5617	8508		0	7273	12428		0	5785	9623		0	4519	8542		0	4818	8442		0	5465	5174		0	5465	5007		0	3903	6224		0	3650	4892		0	7608	9172
							1	4989.86	6877.63		1	5445	8540		1	7252	11882		1	5009.61	9670.61		1	4475	9086		1	4455.61	7947.57		1	4647.62	5108.59		1	5531.86	5727.48		1	3951.87	6097.42		1	3716.61	5350.53		1	8323.19	10712.4
							2	5235.59	6954.58		2	5091	8561		2	6168	12417		2	5454.43	9097.31		2	4631	8528		2	4756.77	7486.95		2	4638.73	5428.02		2	6021.22	6682.38		2	3930.64	5344		2	3776.25	6130.72		2	6935.13	10989.9
							3	5283.26	6808.69		3	4911	8222		3	6739	12531		3	6069.48	9270.95		3	4423	7928		3	5110.29	7018.06		3	4703.5	6185.29		3	5935.4	7103.21		3	3815.71	5355.47		3	3861.98	6154.53		3	5639.08	9375.66
							4	5016.68	6673.64		4	4859	8318		4	7899	12683		4	7127.23	9275.18		4	4452	8759		4	5276.95	6834.37		4	4892.67	6113.38		4	5551.59	6886.76		4	3796.58	5184.92		4	3873.55	6383.55		4	5206.14	8888.98
							5	5281.72	6615.88		5	5110.62	8929.06		5	6138	12283		5	6375.38	9097.54		5	4793	9453		5	6628.96	6713.86		5	4909.24	6385.54		5	5326.99	6183.56		5	3860.96	5468.18		5	3801.04	6217.82		5	5031.95	9079.38
							6	5888.04	6639.28		6	5281.66	9411.21		6	6188.94	11783.9		6	5788.28	9253.49		6	4975.18	9190.96		6	6404.86	7427.5		6	4988.93	6350.58		6	5510.65	6014.36		6	3922.31	5929.84		6	3815.79	6080.43		6	5240.8	8740.39
							7	5851.41	6556.06		7	5493.09	10788.2		7	6254.8	11817.6		7	5425.77	8934.73		7	5508.63	9633.89		7	6176.17	7354.15		7	5063.32	6231		7	5296.42	6194.01		7	3894.67	6170.93		7	3813.71	5959.03		7	5773.7	8076.38
							8	5377.68	6288.35		8	5553.98	10113.3		8	6974.46	12143.4		8	5185.07	8686.26		8	6503.4	10239.1		8	6011.27	7250.88		8	5072.24	5957.13		8	5045.8	6337.26		8	3932.49	5706.89		8	3774.73	5735.94		8	5758.71	8283.82
							9	5012.38	5927.33		9	5838.18	9714.78		9	8235.8	12793.6		9	4964.58	8761.71		9	7266.96	9716.56		9	5580.12	7605.41		9	4821.32	5932.51		9	4839.79	7196.65		9	4191.95	5334.82		9	3683.67	5511.11		9	6560.86	9087.74
							10	4529.41	5812.25		10	5626	10003.8		10	9981.88	13652.3		10	5090.8	9407.22		10	7228.08	9387.59		10	5276.99	8441.4		10	4619.27	6267		10	4701.35	8355.15		10	4335.23	5322.25		10	3751.81	5740.99		10	7610.88	9600.3
							11	4628.76	5764.91		11	5251.86	9751.25		11	8528.53	12259.5		11	6205.76	10229.4		11	6176.65	8913.76		11	4837.42	9776.5		11	4362.27	6466.78		11	4636.7	10218.7		11	4273.28	5357.57		11	3840.24	5580.25		11	7679.7	9238.46
							12	4917.22	5576.45		12	5289.87	8905.06		12	6657.69	12569.7		12	6098.98	10695.7		12	5068.57	8740.99		12	4870.52	8918.45		12	4127.02	6248.16		12	4578.3	10475		12	4519.86	5643.66		12	4417.79	5109.8		12	6920.32	8491.29
							13	4650.58	5124.89		13	5424.54	8325.79		13	5510.19	12170.6		13	5396.86	10613.7		13	4982.67	8292.91		13	4030.23	7270.95		13	3925.12	5656.27		13	4277.82	10273.8		13	4904.95	5966.31		13	4026.48	4894.8		13	6277.87	7644.74
							14	4574.54	4627.94		14	5734.35	8045.89		14	5149.53	11633.8		14	5129.1	10899.5		14	5456.79	8438.16		14	3953.56	6365.63		14	3685.23	4685.21		14	4218.5	10303.8		14	6559.35	6800.86		14	4153.94	5246.36		14	6027.09	7450.67
							15	5505.81	4822.04		15	5983.33	8226.37		15	5019.59	10528.2		15	5469.8	11068.1		15	6170.89	7834.07		15	3972.94	5807.44		15	4020.09	5023.41		15	4134.72	11137		15	5449.29	6540.98		15	5166.86	5191.98		15	6221.24	8253.62
							16	6733.66	5386.06		16	6047.99	8319.76		16	5913.32	10712.2		16	5131.67	10760.5		16	6416.71	7744.63		16	4586.55	6130.33		16	4386.87	5131.27		16	4319.12	8225.76		16	4969.41	5507.79		16	5087.02	5298.65		16	6921.69	8781.91
							17	6271.49	5822.25		17	6368.56	8396.96		17	5845.12	9818.17		17	4834.24	10004.9		17	6979.66	7638.43		17	4305.06	5682.21		17	4497.29	5546.54		17	4400.29	6898.07		17	5522.98	5282.72		17	5037.11	5255.4		17	7842.24	9230.6
							18	5639.32	5800.24		18	6324.66	8446.27		18	6131.63	8462.81		18	4767.85	8796.23		18	6935.64	6939.68		18	3885.04	5495.83		18	4400.47	5590.26		18	4493.34	6246.64		18	5158.71	5278.9		18	4923.42	5526.26		18	7696.95	8991.32
							19	5190.96	5724.76		19	6250.49	8820.75		19	6718.6	8323.37		19	5173.03	9459.08		19	5947.49	6449.25		19	3826.4	5863.95		19	4255.57	5083.69		19	4643.65	5957.92		19	5380.78	5155.34		19	5508.26	6474.26		19	6961.98	7697.36
							20	4840.2	6287.52		20	5991.86	10115.9		20	6919.73	8708.26		20	5170.41	10213.3		20	5420.11	6714.91		20	3976.91	6945.95		20	4149.83	4681.19		20	4825.56	5595.38		20	4504.32	5139.39		20	6142.99	6580.21		20	6920.69	6700.56
							21	4729.61	9206.9		21	5727.74	11297.7		21	6667.28	8470.54		21	4820.83	9944.56		21	5402.06	7059.62		21	3974.54	6804.21		21	4112.84	4786.12		21	4557.59	5223.31		21	4130.06	4945.51		21	4692.87	5762.64		21	6216.68	6737.08
							22	4642.33	14254		22	5445.66	10739.7		22	6044.59	8328.54		22	4639.37	9536.49		22	5222.41	7247.52		22	3753.87	5370.34		22	4444.7	5183.41		22	4605.15	5139.31		22	4268.78	5101.87		22	4342.75	5537.23		22	6068.68	6964.95
							23	4568.94	16401.8		23	5394.1	9905.7		23	6061.14	8807.26		23	4517.8	8761.53		23	4719.13	6921.28		23	4213.62	5959.28		23	4677.41	5621.1		23	4764.26	5202.42		23	3728.52	5700.6		23	4203.6	5385.11		23	6103.44	7451.02
							24	4380	16744		24	5327.15	9603.82		24	6627.35	9361.68		24	4384.81	8062.83		24	4430.68	6752.12		24	4356.88	6657.77		24	4544.3	5409.51		24	4818.56	5333.4		24	3774.42	5775.81		24	4278.1	5365.82		24	5604.71	7367.9
							25	4518.34	10743.3		25	5194.36	9987.15		25	8283.23	11192.8		25	4640.81	7973.88		25	4179.15	6327.41		25	3979.41	8188.38		25	4340.85	4969.52		25	5047.84	5575.71		25	3658.85	5444.46		25	4051.46	5332.28		25	5007.28	7140.36
							26	4577.25	7907.09		26	5397.04	11163.9		26	7973.46	10948.1		26	5540.74	7436.29		26	3880.81	6050.31		26	3793.37	7968.99		26	4538.29	5098.01		26	5303.77	5646.25		26	3874.49	5934.67		26	3986.25	5669.38		26	5046.45	7198.8
							27	4664.28	7257.72		27	5569.26	12322.6		27	7334.25	10324.6		27	4744.1	7400.07		27	3787.16	6351.06		27	3879.47	6821.77		27	5129.12	5192.99		27	5612.87	5405.52		27	3916.78	6504.98		27	3895.27	5764.66		27	5201.6	7527.83
							28	4884.17	7309.76		28	5936.07	11733.7		28	6840.91	9603.05		28	4685.34	9036.42		28	3763.4	6762.32		28	3927.38	6156.62						28	5538.9	5700.46		28	3789.31	6392.13		28	3871.2	5367.59		28	5249.33	7698.43
							29	5801.1	7856.69		29	6542.45	11629.1		29	6967.57	9017.12		29	5783.47	10626.1		29	3695.51	7164.01		29	3765.5	6237.61						29	5653.36	6025.24		29	3839.09	6186.37		29	3823.76	5252.24		29	5226.3	8193.04
							30	6327.06	7971.86		30	7162.72	11841.1		30	7723.42	9685.65		30	7050.27	11219.9		30	3738.42	6833.23		30	3640.8	5804.55										30	3820.25	5890.76		30	3840.46	5338.65		30	5227.2	8402.71
							31	5381.7	7768.44		31	7347.89	11827.7		31	7236.92	10134.5		31	7328.77	10083.8		31	3740.2	6134.16		31	3767.42	5959.19										31	3823.34	5103.96		31	3932.53	5488.15		31	5344.34	8167.07
							32	4699.57	7634.66		32	6677.71	11618.5		32	6498.34	10198.2		32	6172.07	8971.87		32	3901.64	6004.28		32	4249.48	6299.18										32	3814.3	4965.48		32	3937.5	6126.57		32	5458.5	8168.16
							33	4734.5	7763.13		33	6356.08	11833		33	6160.94	10548.2		33	5728.82	8901.42		33	3880.05	6237.4		33	4386.31	6763.89										33	3761.26	4797.93		33	3866.13	6069.84		33	5167.25	8392.44
							34	4820.72	8644.04		34	7192.43	11986.4		34	6502.17	11098.8		34	5704.25	9149.84		34	3887.03	6728.52		34	4097.16	7402.67										34	3678.15	4520.82		34	3789.2	5676.47		34	5543.69	8992.47
							35	4786.6	7615.72		35	9653.19	12063.3		35	7299.9	11115.5		35	5368.23	8630.85		35	3873.92	6573.62		35	4611.52	6937.59										35	3717.86	4834.33		35	3742.16	5385.93		35	5952.5	8830.37
							36	4773.16	7390.84		36	11472	11264		36	8759.98	11307.7		36	5197.19	8856.96		36	3984.89	6719.61		36	4804.66	6606.29										36	3813.43	5198.94		36	3801.82	5290.51		36	5503.13	8577.07
							37	4922.52	7801.32		37	9913.65	10800.8		37	9287.33	11798.4		37	5327.12	9627.2		37	4046.19	6884.02		37	4894.82	6497.06										37	3794.98	5341.34		37	3700.4	4984.82		37	5081.27	9514.74
							38	5254.68	7796.88		38	9064.98	9567.27		38	8030.37	12441		38	5614.98	10339		38	4140.19	6895.45														38	3773.44	5623.73		38	3684.8	5179.1		38	4907.97	10247.2
							39	5741.4	7432.08		39	7788.14	8748.25		39	6814.8	11144.4		39	6590.96	10667.9		39	4115.65	6185.6														39	3811.22	5883.42		39	3777.28	5478.64		39	4832.08	10588.5
							40	5413.52	7458.91		40	6169.22	8166.47		40	6533.23	10725.7		40	7854.24	11207.7		40	4170.05	5880.9														40	3933.86	6191.53		40	3634.45	5402.52		40	4890.84	10246.2
							41	5437.32	7575.4		41	5276.02	8158.02		41	6447.15	11017.3		41	8583.17	10616.2		41	4305.95	6267.35														41	3948.44	5585.38		41	3726.67	5697.4		41	4909.55	9291.53
							42	6004.04	7567.62		42	4817.75	8592.34		42	6508.53	11041		42	9115	9947		42	4203.51	6308.34																		42	3821.65	5916.34		42	5101.05	8350.25
							43	5904.93	7379.02		43	4533.11	8366.54		43	6524	11351		43	9357.76	10742.7		43	4399.05	6213.05																		43	3882.27	6156.19		43	6198.33	7618.6
							44	5791.67	7425.76		44	4493.81	8493.7		44	6232.02	11036.9		44	8179.88	11082.1		44	4366.44	6436.86																		44	3814.85	5628.77		44	5852.2	8060.62
							45	5998.55	7661.26		45	4665.81	8704.63		45	6690.97	11037.5		45	6820.45	10527.8		45	4465.99	6460.84																						45	4816.06	8316.69
							46	7395.67	8242.07		46	5069.61	9030.2		46	7160.18	11873.3		46	7011.12	10782.4		46	4488.54	7095.49																						46	4646.99	7454.54
							47	7553.6	8064.32		47	5523.51	8759.66		47	6455.76	12107.5		47	7007.03	10579.4		47	4561.83	8286.48																						47	4600.02	7474.14
							48	7837.85	8038.28		48	5997.83	8553.38		48	5614.68	10772		48	6587.32	10289.1		48	4498.91	8897.23																						48	4795.78	7927.5
							49	7661.26	8003.92		49	5067.2	7484.71		49	5249.48	10344.8		49	7316.63	10096.5		49	4492.9	8525.3																						49	4915.58	7696.31
							50	8233.19	8292.51		50	5402.15	8467.92		50	5408.87	10118.4		50	7130.91	9861.07																										50	4820.26	7375.3
							51	7947.28	9234.09		51	5384.17	9210.93		51	6127.88	10651.7		51	7633.31	9542.97																										51	4431.84	7591.8
							52	6002.18	8461.48		52	5225.97	9486.08		52	6622.53	10558.3		52	7842.45	9537.26																										52	4751.64	8004.9
							53	5669.82	7603.75						53	6480.61	10243.2		53	7077.02	9318.74																										53	5200.46	8385.24
							54	5978.52	7132.99						54	6658.63	10400.6		54	5823.94	8837.09																										54	5188.4	8520.36
							55	5766.52	7115.42						55	7195.22	10666.4		55	5179.87	8774.56																										55	5339.92	8507.7
							56	5394.8	7085.8						56	7370.04	10680		56	5363.81	8880.19																										56	6535.34	8936.02
							57	5334.6	6731.4										57	5873.22	8807.26																										57	6125.15	8792.86
																																															58	6439.26	9506.8
																																															59	7574.77	10740.9
																																															60	8584.76	10753.4
																																															61	7603.5	9231.54
																																															62	7665.39	10087
																																															63	5139.52	7119.42

## Sheet: Y_N60_N159
	File					File	181108_Run9_Nu60_Mlp1_refNup159_BR__1_MMStack_Pos1cell1age1				181108_Run9_Nu60_Mlp1_refNup159_BR__1_MMStack_Pos1cell2age1				181108_Run9_Nu60_Mlp1_refNup159_FL__1_MMStack_Pos2cell1age2				181108_Run9_Nu60_Mlp1_refNup159_FL__1_MMStack_Pos2cell2age3				181108_Run9_Nu60_Mlp1_refNup159_FL__1_MMStack_Pos2cell3age3				181108_Run9_Nu60_Mlp1_refNup159_FL__1_MMStack_Pos2cell4age1				181108_Run9_Nu60_Mlp1_refNup159_FL__1_MMStack_Pos2cell6age3				181108_Run9_Nu60_Mlp1_refNup159_FL__1_MMStack_Pos2cell8age1				181108_Run9_Nu60_Mlp1_refNup159_FL__1_MMStack_Pos2cell9age2				181108_Run9_Nu60_Mlp1_refNup159_FL__1_MMStack_Pos3cell1age3				181108_Run9_Nu60_Mlp1_refNup159_FL__1_MMStack_Pos3cell2age2
	protein	Nup60				protein	Nup60				Nup60				Nup60				Nup60				Nup60				Nup60				Nup60				Nup60				Nup60				Nup60				Nup60
						cluster	0				0				0				0				0				0				0				0				0				0				0
	Cells	32				Cell	1				2				1				2				3				4				6				8				9				1				2
	Age	2				Age	1				1				2				3				3				1				3				1				2				3				2
	correlation	0.676259				correlation	0.634669				0.40103				0.614701				0.911344				0.923913				0.948299				0.873573				0.815061				0.810267				0.479076				0.835046
	GFP	6629.3				GFP	7255.35				7278.62				7464.34				7752.14				7750.48				5953.17				7103.18				8064.38				6013.62				6672.44				6169.52
	stdev	768.29				stdev	1236.85				526.633				987.157				1083.81				1008.9				733.211				748.781				773.269				581.601				476.851				820.213
	mCh	7121.58				mCh	7326.01				7856.68				8000.68				8219.53				7286.98				6164.74				6937.25				7532.91				6801.44				7208.63				6347.18
	stdev	614.207				stdev	535.888				480.274				519.164				765.286				688.626				704.557				442.67				629.34				477.511				518.573				638.875
							0	8981	8275		0	7784	7682		0	7103	8191		0	7773	8162		0	9103	7942		0	6284	6433		0	7524	7507		0	9208	8567		0	6230	6606		0	6965	7512		0	5947	6014
							1	8373.19	8018.36		1	7732.6	7275.79		1	7048.25	8245.05		1	7394.55	8044.08		1	8148.03	8030.35		1	5642.98	5493.93		1	7228.63	6772.32		1	9436.45	8554.55		1	6260.49	6687.11		1	7286	7501		1	5911.36	6007.59
							2	8220.33	7675.5		2	7049.11	7675.83		2	7117.27	8014.12		2	8197.43	8433.72		2	8391.24	8039.94		2	5462.83	5768.9		2	7256.02	6827.66		2	9724.14	8659.18		2	6079.2	6822.41		2	6732	7489		2	6196.09	6215.03
							3	8512.22	7358.2		3	6886.97	7591.19		3	6708.53	8054.86		3	9825.09	9380.91		3	8303.09	7774.18		3	5563.13	6115.18		3	7201.72	6904.4		3	9236.54	8349.06		3	6146	7161.09		3	7188	7905		3	5648.58	6012.68
							4	9120.06	7319.41		4	6944.4	7740.47		4	6507.96	8291.42		4	9626.43	9587.03		4	7412.7	7427.14		4	5577.02	5921.34		4	7330.16	6874.28		4	8288.16	7553.03		4	6882.65	7521.5		4	6596.88	7502.44		4	5900.64	6239.72
							5	9691.44	7584.68		5	7455.53	7796.32		5	5753.94	7202.2		5	8668.38	8865.16		5	6588.85	6653.43		5	6019.78	6359.92		5	7655	6980.94		5	7982.02	7217.58		5	7783.61	7731.18		5	6442.86	7151.67		5	5755.8	6053.02
							6	8778.56	7316.48		6	7770.32	7709.8		6	6404.17	7189.82		6	7575.46	8199.81		6	6211	6157.91		6	6496.2	6722.13		6	7541.44	6981.05		6	8083.76	7014.8		6	7351.19	7468.74		6	6357.85	6624.32		6	5947.1	6081.36
							7	7489.68	6718.01		7	8025.69	7949.29		7	6689.58	6959.91		7	6491.79	7353.94		7	5959.58	6073.68		7	6705.07	6741.58		7	7604.82	7183.6		7	7863.26	6585.39		7	6769.36	7268.16		7	6240.91	6222.59		7	6028.43	6382.19
							8	6637.67	6630.58		8	7510.88	7772.14		8	6753.42	7150.77		8	5768.53	6706.2		8	5983.87	6008.51		8	6768.76	7133.21		8	7899.92	7435.59		8	7879.62	6939.64		8	6233.97	7219		8	6509.28	6416.06		8	6251.05	6417.22
							9	6473.07	6643.41		9	6891.38	7544.29		9	8077.4	7756.6		9	5810.69	6927.6		9	5902.34	6238.8		9	7288.7	7138.78		9	8037.36	7388.71		9	7949.73	7681.25		9	5912.49	7075.62		9	7254.24	6538.75		9	6698.25	6682.29
							10	6698.37	7215.07		10	6749.85	7431.85		10	9173.6	7848.2		10	6180.81	6953.93		10	6939.79	6782.58		10	7205.28	6961.4		10	8164.35	7411.24		10	7950.51	7443.14		10	5766.85	6768.95		10	8026.48	6887.16		10	6837.35	6539.5
							11	7285.66	7621.92		11	6525.06	7331.52		11	9269.8	8279.6		11	6837.69	7487.22		11	7106.94	6788.1		11	6816.84	6766.92		11	7754.21	7353.38		11	8605.58	7435.3		11	5890.27	7077.33		11	7249.61	7882.3		11	6995.22	6529.09
							12	7960.24	7922.14		12	6229.05	7382.43		12	9105.8	8596		12	7453.33	8507.78		12	7132.52	6813.53		12	6712.86	6625.56		12	7162.34	7415.29		12	8428.8	8075.78		12	5952.05	7219.93		12	6658.44	8156.24		12	7594.78	6773.18
							13	7862.49	8053.72		13	6133.36	7886.39		13	8909.4	8491		13	6749.62	8174.81		13	7684.85	6941.2		13	6931.01	6720.27		13	6189.98	6996.63		13	8178.89	7963.6		13	6275.05	7277.8		13	6388.22	7596.16		13	7680.44	7331.29
							14	7398.12	7890.94		14	6198.96	7696.34		14	9137.8	8315.8		14	7005.32	8634.67		14	7470.31	6953.84		14	6778	6769.63		14	5865.11	6444.1		14	7376.82	7430.06		14	6008.68	7265.71		14	6869.43	7368.33		14	7096.05	8045.87
							15	7162.45	8046.54		15	6834.54	8213.76		15	8313.93	8151.11		15	7471.59	8480.48		15	7750.19	7084.31		15	6295.7	6299.64		15	5760.61	5896.73		15	7028.92	6843.3		15	5910.86	7053.95		15	6774.6	7234.55		15	7379.18	8135.99
							16	7559.64	8136.21		16	7918.72	9305.88		16	8550.87	8512.31		16	7419.63	8155.32		16	8262.26	7462.69		16	5796.68	5798.22		16	6044.19	6122.5		16	7175.22	6650.52		16	5425.8	6306.09		16	6504.38	6544.7		16	6915.41	7019.45
							17	6335.05	7486.5		17	7701.6	8805.96		17	7779.93	8240.75		17	7828.9	7670.26		17	8434.14	7839.75		17	5500.6	5555.81		17	6302.14	6329.71		17	7508.36	6849.14		17	5650	6224.75		17	6341.17	6569.5		17	6897.97	6394.61
							18	5287.64	7202.01		18	7650.83	8518.33		18	7255.4	8425.59		18	7286.99	7645.65		18	8726.15	7925.01		18	5094.93	5326.32		18	6521.16	6624.54		18	7636.71	7068.14		18	5872.5	6332.5		18	5638.06	6423.81		18	7216.53	6538.77
							19	5160.27	7019.51		19	7414	8216.19		19	7671.68	9172.77		19	7535.54	8295.89		19	9131.05	7960.06		19	4380.23	4541.38		19	6269.49	6698.35		19	7175.5	6968.16		19	5785.75	6379.75		19	6067.29	6826.11		19	6501.66	6794.07
							20	5293.33	6611.25		20	7768.83	7815.73		20	7555.82	8314.69		20	8256.47	9004.84		20	9233.86	7855.62		20	4423.36	4565.79		20	6243.34	6607.17		20	6839	6857.06		20	5763	6416.25		20	6314.64	6987.29		20	5481.7	6145.06
							21	5837.59	6512.53		21	7872.74	7435.07		21	7076.4	7834.96		21	9003.37	9234.86		21	8352.9	7276.3		21	5222.49	5511.11		21	6283.91	6444.16		21	7222.39	7723.21		21	6010.3	6572.37		21	5789	6639		21	4652.11	5252.23
							22	6480.08	6696.57		22	7507.67	7845.94		22	7099.67	8094.93		22	9892.89	9546.75		22	8135.07	7411.34		22	5810.14	6240.78		22	6764.44	6827.74		22	7720.58	7958.47		22	5795.79	6603.16		22	6771.9	7326.38		22	4792.32	5795.41
							23	6114.7	6934.71		23	7820.74	8724.38		23	7075.66	8134.31		23	9367.43	9234.18		23	8642.42	7779.43		23	5719.66	6127.66		23	7735.9	7194.56		23	8498.98	7947.32		23	5711.71	6590.31		23	7037.57	7645.81		23	4831.1	5792.98
							24	5668.23	6560.54		24	7500.04	8465.45		24	7418.24	8270.16		24	8624.89	8896.9		24	8377.83	8113.08		24	5293.18	5678.84		24	7933.06	7386.32		24	8611.58	7987.93		24	5512.8	6748.62		24	7314.62	8073.53		24	4877.2	5319.2
							25	5763.24	6845		25	7433.55	8063.12		25	8139.6	8537.2		25	8323.69	8342.01		25	8128.5	8128.75		25	4874.83	5154.31		25	7925.72	7566.75						25	5100.28	6171.49		25	6642.56	7591.56		25	5337.8	5757.2
							26	5976.8	6717.36		26	7283.4	7665.49		26	7989.8	8172.2		26	7691.89	7764.42						26	5263.9	5488.5		26	7586.83	7131.09						26	5001.28	6014.52		26	6601.26	7347.87		26	5875.02	5999.22
							27	6672.96	7384.8		27	7200.05	7590.13		27	6980.8	7538.6		27	7110.73	7595.61						27	5532.9	5745.03										27	5060.9	5846.42		27	6745.8	7320.98		27	5928.21	6120.51
							28	7594.04	7331.76		28	7001.5	7429		28	6415.66	7401.55		28	7254.19	7777.78						28	5505.73	5638.48										28	5806.45	6285.21		28	6405.68	7327.33		28	5861.37	5986.77
							29	7820.8	7076.36		29	7403	7511.5		29	6203.21	7324.21		29	6837.74	7469.3						29	5529.47	5736.73										29	6193.62	6602.19		29	6822.42	7608.46		29	6290.39	6203.53
							30	8099.12	7317.99		30	7439	7485.5		30	6108.11	7309.41		30	7136.75	7512.39						30	5716.25	6112.63										30	6071	6973		30	6717.86	7538.27		30	5928.89	6183.53
							31	8539.22	7481.07										31	8535.96	8319.68						31	6067.6	6490.2										31	6222	7355		31	6264.01	6918.13
							32	8579.22	8154.26										32	8883.74	8879.18						32	5889.71	6355.68
																											33	6163.85	6842.65
																											34	6466.82	6777.78
																											35	6595.6	6847.09
																											36	6871	7588.95

## Sheet: A_N60_N159
	File					File	181108_Run9_Nu60_Mlp1_refNup159_BR__1_MMStack_Pos3cell2age10				181108_Run9_Nu60_Mlp1_refNup159_BR__1_MMStack_Pos3cell3age17				181108_Run9_Nu60_Mlp1_refNup159_BR__1_MMStack_Pos3cell4age20				181108_Run9_Nu60_Mlp1_refNup159_BR__1_MMStack_Pos3cell5age13				181108_Run9_Nu60_Mlp1_refNup159_BR__1_MMStack_Pos3cell6age24				181108_Run9_Nu60_Mlp1_refNup159_BR__1_MMStack_Pos3cell7age24				181108_Run9_Nu60_Mlp1_refNup159_FL__1_MMStack_Pos4cell1age22				181108_Run9_Nu60_Mlp1_refNup159_FL__1_MMStack_Pos4cell2age23				181108_Run9_Nu60_Mlp1_refNup159_FL__1_MMStack_Pos4cell3age15				181108_Run9_Nu60_Mlp1_refNup159_FL__1_MMStack_Pos4cell4age16				181108_Run9_Nu60_Mlp1_refNup159_FL__1_MMStack_Pos4cell5age20
	protein	Nup60				protein	Nup60				Nup60				Nup60				Nup60				Nup60				Nup60				Nup60				Nup60				Nup60				Nup60				Nup60
						cluster	0				0				0				0				0				0				0				0				0				0				0
	Cells	33				Cell	2				3				4				5				6				7				1				2				3				4				5
	Age	21				Age	10				17				20				13				24				24				22				23				15				16				20
	correlation	0.349381				correlation	0.250042				0.173475				0.893128				-0.164207				0.904766				0.19313				0.647898				-0.109922				0.461462				0.740704				0.285113
	GFP	5876.81				GFP	6228.7				6255.79				6233.98				6370.75				5889.76				6980.87				5765.29				6422.36				6568.05				5035.9				5740.77
	stdev	680.907				stdev	774.373				559.075				1011.03				466.802				890.927				886.597				527.072				806.771				802.168				544.736				621.874
	mCh	8507.64				mCh	10438.2				8767.24				9224.83				8705.82				7535.13				8499.57				8537.04				9315.52				9884.65				7069.04				9826.77
	stdev	1470.5				stdev	1702.09				892.616				1797.2				1970.8				1275.38				1237.14				963.445				774.105				1708.67				1731.01				1381.39
							0	4858	11214		0	6632	8715		0	6489	8887		0	6255	7838		0	5335	6669		0	8448	8544		0	5452	8518		0	6160	8007		0	6233	9299		0	4727	6256		0	7559	10359
							1	5178.27	11778.2		1	6799.35	9128.28		1	6476	9009		1	6321.67	8774.98		1	5774.77	7283.14		1	7336.07	7847.54		1	5529.65	8453.11		1	6238.68	8033.02		1	6410.48	8995.26		1	4600	5959		1	6235.85	9813.73
							2	5707.58	11468.3		2	7759.67	9096.28		2	5418	8372		2	6413.7	8645.03		2	6260.65	7783.72		2	7286.65	7792.9		2	5533.45	8700.34		2	6433.78	8131.9		2	6490.39	8934.44		2	4337	5502		2	5817.83	9290.67
							3	6103.26	11094.6		3	6675.03	9101.75		3	5951.82	8384.71		3	6705.53	8448.74		3	6795.98	8204.7		3	7784.33	7839.23		3	5608.45	9045.81		3	6911.93	8963.78		3	6063.64	8881.7		3	4413.82	5978.25		3	6693.91	9621.36
							4	6158.66	11437.2		4	6657.82	9085.16		4	6611.08	9538.4		4	6957.4	8468.74		4	6746.9	7764.58		4	8269.71	8649.39		4	5788.58	9810.33		4	7324.69	9012.36		4	6163.32	9789.6		4	4515.2	6171.01		4	7036.58	9801.2
							5	6288.96	11324.9		5	7032.69	8842.53		5	7190.78	10629.5		5	7012.74	7817.99		5	6669.43	7526.81		5	7905.01	8402.77		5	5856.14	9668.6		5	7859.96	8756.18		5	6215.58	10399.4		5	4771.96	6998.28		5	7050.88	10047.8
							6	6740.11	12641.4		6	6876.59	8265.27		6	7386.61	12519.6		6	6887.82	7488.09		6	6823.55	7441.8		6	8200.38	8413.75		6	5003.54	8134.57		6	7109.46	8974.26		6	6418.92	12306.9		6	5169.61	7772.33		6	6520.97	10938.6
							7	6610.75	11109.5		7	6536.59	7734.25		7	8018.36	14178.9		7	6886.29	7221.75		7	6474.24	7525.65		7	7692.12	8290.48		7	4885.44	7891.42		7	7405	10084.1		7	7217.68	14199.5		7	5518.93	8352.93		7	5841.69	11519.3
							8	6090.71	9207.63		8	6801.77	8026.67		8	8288.8	14218.4		8	6692.19	7050.82		8	6566.63	9378.1		8	7627.08	8323.37		8	5181.64	8155.65		8	6558.35	9630.43		8	7823.96	14065.9		8	5411.99	9422.74		8	5750.57	11274.3
							9	5970.05	8372.11		9	6828.76	8959.45		9	8342.96	13163.3		9	6705.2	7134.88		9	6631.59	9188.53		9	7840	8687.6		9	5200.98	7870.72		9	6089.42	9072.66		9	7710.81	13408		9	5290.11	10956.8		9	5759.65	11132.2
							10	5901.98	8268.31		10	6605.98	8698.43		10	8188.14	11552.9		10	6117.13	6812.59		10	6482	8004.54		10	8563.8	9525		10	5186.21	7491.43		10	6270.44	8792.57		10	7058.52	13603.8		10	5575.15	11761.6		10	5527.25	10808.9
							11	6053.33	8409.52		11	6643.87	8591.48		11	7850.15	10478.5		11	6645.39	7273.33		11	6416.52	7796.85		11	8600	9562.15		11	5281.56	7939.88		11	6378.98	8658.64		11	7752.4	15343.6		11	5996.44	10983.3		11	5434.6	10432.3
							12	6157.61	9565.6		12	6518.96	8437.48		12	7457.28	9651.37		12	7020.14	7876.05		12	6293.72	7887.43		12	7863.36	8682.33		12	5170.69	7864.96		12	6600.3	9042.27		12	7009.38	13097.7		12	5958.71	9279.54		12	5633.3	9958.65
							13	6590.6	12809.2		13	6098.69	8596.11		13	6730.3	8970.52		13	7194.26	7800.65		13	6262.91	7975.06		13	7885.04	8435.24		13	5101.13	7780.97		13	5962.94	9697.01		13	6034.42	10535.1		13	5589.64	7763.53		13	5769.71	10635.6
							14	7298.95	16361.1		14	6022.7	9538.05		14	6706.31	8537.58		14	6656.83	7614.68		14	6701.78	8773.52		14	6951.05	7475.51		14	5071.26	7342.78		14	5306.34	9392.35		14	5531.57	9028.67		14	5402.12	7069.25		14	5736.87	11486.1
							15	7284.25	14614.2		15	5971.95	12665.5		15	6437.91	8402.83		15	6356.84	7772.64		15	7493.32	10395		15	6338.94	7235.48		15	5369.1	7708.51		15	4844.5	9196.15		15	5328.81	8200.93		15	5146.66	6587.97		15	5692.12	12339
							16	6920.18	12641		16	5878.01	10519.2		16	6230.11	8522.02		16	5899.16	9068.46		16	7119.08	10758		16	6056.96	7057.86		16	5438.59	8191.89		16	4466.05	9199.6		16	5626.31	8135.29		16	4890.49	5987		16	5565.02	12427.2
							17	7113.22	10377.6		17	5695.16	8466.09		17	6373.13	9193.85		17	5642.22	11800.3		17	7049.4	9605.28		17	6236.75	7446.98		17	5238.47	7695.86		17	4770.81	9787.94		17	6065.69	8972.51		17	4644.07	5526		17	5641.71	11900.8
							18	7431.64	9806.1		18	5120.81	7453.59		18	6510.21	9427.28		18	6265.34	15710.5		18	7006.52	9395.44		18	6410.99	8269.11		18	4843.4	6772.04		18	5316.72	10571.3		18	6388.84	9829.34		18	4452.18	5354.85		18	5662.75	11887.7
							19	7563.44	9423		19	5653.13	8445.51		19	6171.35	9473.71		19	6549.93	14891		19	7874.24	9462.36		19	6539.96	9484.08		19	5285.52	7236.92		19	5927.02	11481.2		19	6725.02	9953.84		19	4571.53	5326.27		19	5300.65	12150.4
							20	7759	9594.35		20	5387.06	8564.76		20	6292.13	9633.16		20	6106.2	10223.6		20	6542.14	8632.61		20	6811.8	11733.8		20	6150.54	7860.15		20	6208.6	10560.4		20	6485.88	10013.6		20	5162.22	5807.78		20	5232.09	11479.9
							21	7779.28	9735.48		21	5643.53	8902.2		21	6473.22	9755.76		21	5740.65	7835.97		21	5883.22	8002.39		21	6854.6	13490.1		21	6220.9	7948.76		21	7011.97	10193.7		21	6120.65	9938.94		21	5353.97	6247.77		21	5296.9	10673.6
							22	7182.28	10403		22	5922.04	9051.7		22	6223.91	9774.66		22	5554.04	7697.92		22	5649.98	7879.55		22	6516.63	11620.1		22	5915.95	8046.71		22	6638.97	10070.5		22	6392.6	10054.3		22	5639.74	6849.18		22	5494.5	10491.5
							23	6818.72	10382.5		23	6035.24	8693.9		23	6327.09	10395.1		23	5722.74	8793.04		23	5059.97	7076.36		23	6129.97	8786.95		23	5845.12	8329.85		23	6788.18	9575.12		23	6379.92	9160.78		23	6050.69	7311.7		23	5894.08	10618.5
							24	6433.48	9517.68		24	6014.42	8884.5		24	5996.83	9752.95		24	6163.36	10220.6		24	5199	6731.32		24	5734.35	7448.51		24	5787.24	8446.8		24	6795.57	9322.19		24	6082.74	8641.33		24	5530.79	7549.9		24	6143.81	9748.22
							25	6157.53	8671.27		25	5710.47	8289.22		25	5824.73	9639.56		25	6231.69	11283		25	5689.48	7258.64		25	5612.19	7530.52		25	6268.16	8568.2		25	6407.78	9083.41		25	7269.99	8974.77		25	5356.91	7350.02		25	5662.84	8640.6
							26	6729.01	10080.6		26	5461.64	7609.06		26	5994.96	9089.66		26	6095.09	9144.65		26	5687.91	7512.69		26	5898.65	7409.98		26	6439.01	8260.63		26	7059.33	9589.89		26	8606.22	9315.93		26	5365.6	8302.28		26	5302.56	8455.28
							27	6493.44	11965.3		27	5690.03	7529.62		27	6153.31	9229.87		27	6099.75	8751.64		27	5331.57	6990.1		27	6358.7	7681.89		27	5877.56	7954.16		27	7421.18	9683.8		27	8735.88	9593.53		27	5151.82	7573.36		27	4811.04	8270.3
							28	5554.16	11288.7		28	5840.05	7691.59		28	6088.3	8304.5		28	6635.26	8167.98		28	5037.9	6542.46		28	5875.26	7499.67		28	5491.32	8282.96		28	6904.16	9553.54		28	6994.93	9250.38		28	4942.98	6783.64		28	4927.97	8168.74
							29	5117.8	9891.6		29	6132.13	8599.92		29	5735.25	8208.67		29	6482.7	8290.98		29	4615.49	5760.8		29	5568.92	7851.54		29	5182.92	7754.17		29	7418.4	9111.77		29	6434.25	8890.73		29	4657.97	6154.25		29	4726	7141.39
							30	5141	8716.6		30	5988.61	9217.44		30	5579.91	8193.59		30	6847.6	8738.4		30	4415.97	5564.31		30	5491.78	8418.86		30	5775.8	7756.76		30	6555.36	8656.06		30	6796.86	8853.87		30	4356.06	5594.97		30	4867.72	7492.02
							31	5307.4	8747.6		31	6441.55	9184.73		31	4741.37	7199.95		31	6916	8323		31	4753.41	5910.24		31	6172.99	8781.72		31	6292.39	8094.96		31	6370.5	8211.47		31	6819.69	8952.72		31	4246.12	5228.74		31	4867.34	7643.46
							32	5681.6	9311		32	6655.77	9039.18		32	4949.34	7463.27		32	6380.4	7383.03		32	4612.13	6021.68		32	6823.34	8520.32		32	6689.91	8720.8						32	7566.77	9487.27		32	4268.34	5202.37		32	4951.82	7887.35
							33	5899	8862.6		33	6434	8840.18		33	5228.65	7693.03		33	6132.2	7185.68		33	4407.79	5564.54		33	6667.6	8334.01		33	6674.76	8711.62						33	8042.35	9326.88		33	4154.91	5382.6		33	5221.42	8163.14
							34	5891	8562		34	7164.3	9508.68		34	5052.13	7784.61		34	5423.88	7763.34		34	4506.56	5904.76		34	6576.48	8356.65		34	6238.62	8649.86						34	7326.67	8710.14						34	5357.13	8510.11
							35	5932.8	8944		35	6794.92	9024.54		35	4846.8	7488.26		35	5630.62	8097.64		35	5027.8	6842.84		35	6703.74	8305.65		35	5977.65	9871.17						35	6507.5	8527.35						35	5413.52	9130.36
							36	6181.6	9332.4		36	6064.86	8028.15		36	4843.07	7297.55						36	5235.55	6749.85		36	6546.23	8200.7		36	6875.01	11140.9						36	6422.06	8575.36						36	5383.88	9631.12
							37	5829.8	9367		37	6032.77	7860.24		37	4706.44	6914.09						37	5118.72	6193.92		37	6804.08	8333.74		37	6269.5	11977.5						37	6731.42	9469.44						37	5204.65	9000.24
							38	5356	10121.6		38	5753.05	9036.55		38	4678.2	6670.6						38	5460.24	6670		38	7264.24	8127.63		38	5865.89	9778.24						38	6437.7	9822.62						38	5603.64	8301.72
							39	5163.8	11582						39	4879.4	6618.2						39	5118.72	6193.92		39	7607.13	8025.44		39	5616.38	8651.7						39	6243.81	9581.86						39	5853.13	8507.24
							40	5262.4	10924.8						40	5706.86	8047.92						40	5581.56	6757.52		40	7212.8	7604.46		40	5473.71	8130.8						40	7057.5	10383.1						40	5961.08	9013.12
							41	5912.8	10478						41	6677.01	9176.58						41	5655.03	6968.79		41	8129.04	8954.8		41	5538.54	7874.9						41	7261.82	10745.9						41	6486.44	9552.71
																							42	5891.11	7461.77						42	5989.29	8929.12						42	6239.76	9442.33						42	6509.75	9713.97
																															43	6586.78	9979.46						43	5539.11	8607.09						43	6117.89	9538.72
																															44	6712.69	10004.8						44	5498.4	8726.11						44	6131.35	9255.5
																															45	6533.95	9547.98						45	5605.98	9388.4						45	6422	9177.85
																															46	6387.16	9294.38						46	5476.4	9516.39
																															47	6116.97	8996.74						47	5599.57	8860.6
																															48	5827.7	8590.34						48	5704.32	8346.98
																															49	5808.52	8474.19						49	5752.87	8093.43
																															50	5573.86	8486.74

## Sheet: Y_N170_N159
	File					File	181101_Run8_Nu170_Mlp1_refNup159__1_MMStack_Pos3cell3age2				181101_Run8_Nu170_Mlp1_refNup159__1_MMStack_Pos3cell4age3				181101_Run8_Nu170_Mlp1_refNup159__1_MMStack_Pos3cell5age2				181101_Run8_Nu170_Mlp1_refNup159__1_MMStack_Pos3cell6age3				181101_Run8_Nu170_Mlp1_refNup159__1_MMStack_Pos3cell7age2				181101_Run8_Nu170_Mlp1_refNup159__1_MMStack_Pos3cell8age0				181101_Run8_Nu170_Mlp1_refNup159__1_MMStack_Pos3cell9age2				181101_Run8_Nu170_Mlp1_refNup159_FL__1_MMStack_Pos4cell2age0				181101_Run8_Nu170_Mlp1_refNup159_FL__1_MMStack_Pos4cell4age1				181101_Run8_Nu170_Mlp1_refNup159_FL__1_MMStack_Pos4cell5age3				181101_Run8_Nu170_Mlp1_refNup159_FL__1_MMStack_Pos4cell6age2
	protein	Nup170				protein	Nup170				Nup170				Nup170				Nup170				Nup170				Nup170				Nup170				Nup170				Nup170				Nup170				Nup170
						cluster	0				0				0				0				0				0				0				0				0				0				0
	Cells	33				Cell	3				4				5				6				7				8				9				2				4				5				6
	Age	2				Age	2				3				2				3				2				0				2				0				1				3				2
	correlation	0.785429				correlation	0.806988				0.825492				0.82618				0.881511				0.814057				0.477042				0.777625				0.914962				0.853496				0.742461				0.738716
	GFP	19929.2				GFP	20878.7				21933.5				19916.8				20455.6				18730.4				20069.1				20542.4				20647.1				20825.5				19876.4				19466.7
	stdev	678.643				stdev	582.233				629.02				605.399				614.465				683.295				381.985				621.485				712.195				714.549				645.456				758.271
	mCh	11904.6				mCh	12282.5				13441.2				11387.8				12344.4				12258.8				11706.4				12220.3				11970.2				12151.2				11779.6				11207.4
	stdev	798.38				stdev	591.286				762.146				589.779				1009.84				854.092				785.042				734.755				864.033				739.543				948.213				621.741
							0	20481	12409		0	22135	14615		0	19596	11215		0	21396	13460		0	19332	12629		0	20526	12541		0	20858	12208		0	21267	12822		0	21016	11696		0	20112	14342		0	18951	10849
							1	20742	11954.4		1	21537.2	13477.9		1	19502.6	11058.4		1	20509	13542		1	19672.6	13222.4		1	20580.3	12410.7		1	20317.5	11895.3		1	20702	12573		1	20691	11557.1		1	21282	14417		1	18626.6	10627
							2	20641	11820.2		2	21293.5	12887.7		2	19220.3	10855.8		2	21380	13663		2	19434.1	12907.1		2	19997.7	11858.7		2	20489.8	12208.8		2	20880.6	12451.9		2	20846.9	12070.3		2	19938	12093		2	18444.5	10773.2
							3	20417.9	11959.8		3	21282	12839.6		3	19207.7	10214.2		3	21051	12978		3	19070.9	12567		3	19650.8	11798.3		3	21099.3	12907.8		3	21535.5	12418.6		3	21828.7	13138		3	20485.6	12023.2		3	17981.7	10845.1
							4	20095.2	11571		4	21730.7	12647.2		4	19638.6	10568		4	20176.6	12149.4		4	19310.5	12763.9		4	19751	12102.9		4	21516.1	12510.7		4	22098.2	12706.5		4	21268.1	12901.1		4	20148.7	11838.4		4	18764.9	11130.2
							5	19956.9	12078.6		5	21364	12206.7		5	19723.2	11285.5		5	20060	12012.5		5	19467.6	13103.9		5	20084.5	13121		5	21704.7	13073.8		5	21778.6	12880.5		5	21312.2	12583.3		5	20179.2	11464.8		5	19180.1	11623.8
							6	20483.7	12211.6		6	21527.7	13244.8		6	19856.2	11410		6	19773.4	11654.7		6	19841.2	13019.5		6	19982.1	13352.8		6	21905.6	13646.7		6	21629.2	13268.2		6	20641.5	12321.3		6	20261.8	11944.5		6	19471.3	12399.6
							7	20311.9	11918.1		7	21536.2	14071.1		7	19834.7	10915.3		7	19916.9	11515.6		7	19613.7	13868.8		7	19980.7	13415.9		7	21578.1	13078.7		7	21118.4	12707.6		7	21179.2	12084.4		7	20831.5	12461.3		7	20501.2	12303.7
							8	20828.1	11581		8	20855.8	12844.4		8	19442.9	11347.8		8	19792.1	11283.8		8	19490.5	13727.3		8	20550.8	13175.8		8	21437.1	12306.1		8	20382	11818.4		8	22007.4	13008.5		8	20724.1	12261.6		8	20378.9	11883.3
							9	20873.4	11528.5		9	21370.8	12188.2		9	19842.5	11934.4		9	19713.6	11397.5		9	19111.7	13372.1		9	20292.4	12416.6		9	20575.3	11381.8		9	20240.4	11763		9	22100.6	13715		9	20043.9	12021.4		9	20425.6	12045.9
							10	20446.9	11512.1		10	22436.6	13736.1		10	19518.8	11633.1		10	20281.4	12093.2		10	19012.4	13202.7		10	19948.4	11830.9		10	20205.1	11249.4		10	20441.8	11455		10	21543	13110.2		10	19494.9	11495		10	20282.5	12039
							11	20829.6	11892.7		11	23190.6	14529.5		11	19690.9	11091.5		11	20710.1	12624.7		11	19381.9	12974.2		11	19869.4	11599.9		11	20276.3	11552.3		11	20176.2	11208.5		11	21333.6	12808.2		11	19414.1	11404.9		11	20149.7	11882.9
							12	21331.8	12694.7		12	22476	13951		12	19699.2	11320.6		12	20312.1	12692.1		12	20033	12948		12	19710.8	11405.3		12	20231.3	11825.6		12	20121.6	11239.9		12	21648.5	12750.2		12	19949.7	11623.3		12	20318.3	11790.7
							13	21563.8	13076.9		13	22865.8	14302		13	19320.9	11178.4		13	20510.2	13274.1		13	18867.5	12269.2		13	19722	11229.9		13	20480.1	12304.3		13	20139.5	11081.7		13	21734.2	12320.3		13	20219.7	11914.4		13	20249.4	11656.2
							14	21133.2	12562		14	22251.9	13402.5		14	19655.4	11141		14	20677.6	13283.8		14	18280.8	12139		14	19411.1	10908.4		14	20884.4	12780.5		14	20423.7	11174.3		14	20797.3	12279.4		14	20327.2	11892.3		14	19876.6	11304.8
							15	20423.9	11873		15	21931.6	13074.7		15	20549.6	11717.1		15	20555.6	12497.9		15	18308.2	11658.2		15	19524	11180.8		15	21195.1	12890.6		15	20467.7	11792.3		15	21323.8	12154.8		15	20114.5	11486.3		15	20173.1	11587.1
							16	20078.4	11403.5		16	21792.5	12847.4		16	20848.6	11979		16	19955.2	12542.8		16	18627.8	11849.8		16	19822.3	11319.4		16	21360.9	12994		16	20593.8	12079.7		16	21341	13160.6		16	20189.7	11578.6		16	20005.5	11361.6
							17	21026.6	11925.2		17	22129.8	13262.2		17	20702.2	12168.7		17	19733.9	11392.2		17	18556.3	12049.1		17	19864	11341.2		17	21163.2	13017.3		17	20294.4	11597.6		17	21077	12807.9		17	19982.4	11641.3		17	20124.2	11139.2
							18	21078.8	12673.1		18	22046.2	13986		18	21428.9	12727.9		18	19981.9	11625.7		18	18421.1	11769.6		18	19800.8	11271.9		18	20978.3	13201.9		18	20137.3	11122.1		18	20619.8	12552.3		18	19855.2	11471		18	19901	10926.1
							19	21299.4	12855.4		19	22156	13818.7		19	21119.7	12452.8		19	20166.9	11796.1		19	17650.2	11615.7		19	19976.7	11197.5		19	20813.3	13104.1		19	20006.4	10777.7		19	19940.2	11722		19	20149.9	12072.9		19	19778.5	10641.4
							20	22097.4	12897.5		20	22584.9	13793.3		20	20521	12440.2		20	20089.7	11236.5		20	17523.1	11354.3		20	19913.8	10771.1		20	20589.9	12529.5		20	19539.3	10455.1		20	19737.4	11748.8		20	20429.5	12240.2		20	19396.3	10311.7
							21	22162.8	13308		21	22351.5	14171.2		21	20415	12254		21	20184.9	10923.2		21	17817.8	11068.3		21	19760.8	10641.4		21	19975.9	11976.6		21	19325.6	10451.2		21	20281.8	11993.4		21	20617.2	11879.1		21	19386	10746
							22	21839.4	13402.4		22	22406.6	14353.7		22	20808.5	11984.8		22	20021	11151		22	17911.9	11133.7		22	19835.3	10884.4		22	19813.6	11153.7		22	19262.5	10561.7		22	20735.1	12019.4		22	19835.4	11251.4		22	19843.4	11547.7
							23	21464.5	13181.3		23	22935.1	14561.9		23	20682.1	11385.3		23	19741	10678		23	17735.6	11289.4		23	20214.8	10963.7		23	19786	10925.2		23	19691.2	10915.4		23	20445.7	11939.9		23	19255.8	10959		23	19646.5	11526.6
							24	21426.3	12969.2		24	22542.4	14123.9		24	19708.2	10808.2		24	20389.9	11367.5		24	17972.2	11753.8		24	20242.6	11408.3		24	19951	11210.2		24	20547.8	12093		24	19972.6	11340.5		24	18634.8	10538		24	19073.3	10939.9
							25	20855.1	12562.5		25	22311.9	13948.3		25	19834.3	10774.2		25	19841.6	11034		25	18150	12132.7		25	19974.8	11491.9		25	20218.5	11425.1		25	21315.5	12870		25	19648.4	10990.9		25	18718.5	10734.1		25	19129	10682.6
							26	20457.4	12517.4		26	21933	13149.3		26	19899.4	11148.3		26	19789	11288.9		26	18366.9	13335.4		26	19956.3	10965.8		26	20241.5	11449.4		26	21696	13042.1		26	19643.4	10484.1		26	18832.2	10801.7		26	18942.7	10582.8
							27	20658.2	12124.5		27	21323.5	12536.1		27	19615.2	11145.3		27	20161.2	11947.5		27	19176.8	13086.8		27	19875.3	10578.9		27	20024.3	11479.3		27	21238.5	12956.1		27	19562.1	11208.2		27	18844.8	10254.1		27	18696.5	10543.2
							28	20476.9	11729.3		28	20785.5	12001.2		28	19167.4	10936.7		28	21115.2	12936.2		28	18977.2	12367.1		28	19917.6	10568.8		28	19756.3	11540		28	20992.9	12653.6		28	20090.5	11470.9		28	18621.5	9961.23		28	18402.1	10324.6
											29	20919.8	12664.9		29	19317.8	10976.3		29	21656.7	13583.3		29	18724.9	11460.9		29	19967.5	10954.5		29	19508.4	11550.1		29	20898.1	12950.3		29	20790.3	11729.5		29	19255.3	10635.6		29	17899.9	10206.9
															30	19577.3	11249.6		30	21641.5	13969.3		30	18291.8	11496.3		30	20317.8	11628.6		30	19721.6	11545.6		30	20850.7	12663.4		30	20869.7	12176.4		30	19695.2	11504
															31	19393.8	11091.6		31	21610.7	14083.1		31	18071.6	10866.1		31	20490.2	12148.7		31	20373.9	12610.3		31	20915.7	12496.3		31	20388.8	10994.2		31	19464.5	11730.5
																			32	21301.8	13636.2		32	18016.9	10851.4		32	20713	11941.6		32	20166	12061.1										32	19432.1	12782.7
																			33	20876	13283.7		33	18451.4	11577.2		33	21285.1	12067.3		33	19950.6	11924.8										33	20326.3	13328
																			34	20871.9	13455.3		34	18891.3	11628.8		34	20466.7	12317.6		34	19987.1	12592.2										34	20007.2	12240
																											35	20664.8	12544.3		35	20437.7	13224.8
																											36	19914.2	11779.5		36	20842.2	13255
																															37	20197.7	11780.9

## Sheet: Aged_N170_N159
	File					File	181101_Run8_Nu170_Mlp1_refNup159__1_MMStack_Pos3cell1age17				181101_Run8_Nu170_Mlp1_refNup159__1_MMStack_Pos3cell2age20				181101_Run8_Nu170_Mlp1_refNup159__1_MMStack_Pos3cell3age16				181101_Run8_Nu170_Mlp1_refNup159__1_MMStack_Pos3cell5age22				181101_Run8_Nu170_Mlp1_refNup159__1_MMStack_Pos3cell6age21				181101_Run8_Nu170_Mlp1_refNup159__1_MMStack_Pos3cell7age21				181101_Run8_Nu170_Mlp1_refNup159__1_MMStack_Pos4cell1age21				181101_Run8_Nu170_Mlp1_refNup159__1_MMStack_Pos4cell3age25				181101_Run8_Nu170_Mlp1_refNup159__1_MMStack_Pos4cell4age22				181101_Run8_Nu170_Mlp1_refNup159__1_MMStack_Pos4cell6age26				181101_Run8_Nu170_Mlp1_refNup159__1_MMStack_Pos4cell7age24
	protein	Nup170				protein	Nup170				Nup170				Nup170				Nup170				Nup170				Nup170				Nup170				Nup170				Nup170				Nup170				Nup170
						cluster	1				1				1				1				0				0				1				0				1				1				0
	Cells	30				Cell	1				2				3				5				6				7				1				3				4				6				7
	Age	21				Age	17				20				16				22				21				21				21				25				22				26				24
	correlation	0.784929				correlation	0.94504				0.965839				0.822345				0.519869				0.693971				0.533653				0.805968				0.76389				0.802626				0.926403				0.786476
	GFP	19834.6				GFP	21172.6				22552.2				21199.4				20096.4				20635.3				20581.8				19759.3				17905.7				17327				18954.5				18476.9
	stdev	1274.21				stdev	2602.77				4898.07				736.968				721.921				915.883				896.768				739.071				647.563				481.733				670.681				888.31
	mCh	14314.8				mCh	14984.1				15593.6				15649.8				15187.5				14716.1				15124.8				15317.7				12112				11853.2				12589.8				11934.9
	stdev	1987.7				stdev	3460.28				4404.16				1611.73				3831.61				1698.98				1437.27				1290.09				625.918				971.719				1169.87				1111.26
							0	19910	12711		0	20322	12816		0	21527	16560		0	20127	13146		0	19799	13188		0	20504	15887		0	19442	15032		0	18213	12359		0	16583	11114		0	18777	13439		0	19676	12346
							1	20096.9	13173.5		1	20120.9	12733.2		1	21851.3	17228.6		1	19992.2	12886.5		1	20816.6	13719.7		1	20900.6	14810.4		1	19965.8	15418		1	17841.5	12640.2		1	17061.1	11155.2		1	19108	12609.7		1	20206.8	12610.3
							2	20391.9	13351.1		2	20118.7	12554.2		2	22037.8	18100.6		2	19885.8	12730.9		2	21382.6	14753.3		2	21030.1	14998.8		2	19828.6	15282.3		2	18025.2	12424.7		2	16761	11325.5		2	19090.8	12502.1		2	20412	13164.5
							3	20305.6	12985		3	20073.1	12175.4		3	21846.9	17763.7		3	19760.1	12500.3		3	21159	15449.5		3	20585.2	15290.3		3	20014.2	15642.1		3	17576.1	12070.9		3	17451.9	12462.4		3	19228.4	12470.6		3	19948.4	13438.6
							4	20050	12547.8		4	19856.7	12472		4	21695.4	16952.2		4	19858.2	12493.7		4	20829.2	15655.9		4	20340.1	15169.9		4	20936.9	16373.8		4	17266.2	11783.1		4	18321.2	14298		4	19140.6	13052.1		4	19785.5	14595.3
							5	19473	13031		5	19883.4	12538.1		5	22101.7	17554		5	20077	12862		5	20079	14961		5	20078.9	15309.8		5	22010.3	18384.4		5	16800.6	10958.7		5	18188.3	14052.4		5	19359.3	13065.8		5	19659.9	14932.1
							6	19826.2	12877		6	19761	12453.4		6	22348.7	18630.5		6	20244.2	12859.2		6	19925.9	15357.4		6	20101.7	14389.6		6	21839.8	18965		6	16835.5	11200.4		6	17928.6	13083.8		6	19280	12733.2		6	19469.5	13920
							7	20650.8	13492.4		7	19587.3	12087.6		7	22309.9	18605.7		7	21132.7	13212.3		7	20671.3	15774.5		7	20351.9	13837.1		7	20991.2	18776.6		7	16869.5	11783.6		7	17760.2	12266.5		7	19393.1	12955.5		7	19150.6	13085.8
							8	20748	14260.7		8	19708.7	11859.4		8	22226	18156.5		8	21255.6	14114.1		8	20675.3	17032.1		8	20860.5	14199.6		8	21060.1	16642.5		8	17032.7	11987.7		8	17127.6	11488.6		8	19462.4	13606.8		8	18286.3	12239.1
							9	20700.2	15049.7		9	19968.2	12152.3		9	22817	17593		9	20794.8	13766.4		9	20649.3	17473.3		9	21768.7	14678.5		9	20042.7	15079.7		9	17079.8	12249.8		9	16975.2	11096.4		9	19522	14370.9		9	18462.5	11976
							10	20462.1	14853.4		10	20007.9	12857.5		10	21401.8	16595.4		10	20539.2	13695.9		10	20824.1	16499.1		10	22956	15825.3		10	19439.3	14490.1		10	17430.8	12415.8		10	17055.5	10731.7		10	20250.4	15716.6		10	18342.8	11924.9
							11	20415	14574.6		11	20514.5	13296.1		11	21008.8	16401.1		11	20599.6	14112.7		11	20859.3	16420.5		11	23270.9	17548.2		11	19278.3	14008.4		11	17148.8	11548.3		11	17343	11613		11	20716	15823.2		11	18153.6	12017.1
							12	20604	14700.9		12	20163.3	12975.8		12	21201.1	16812.4		12	20548.3	14259.5		12	21129.3	17753.4		12	22587.2	17724.7		12	19437.8	14191.2		12	16919.4	11351.6		12	17882.8	12119.3		12	20350	14922.6		12	18373	12171.5
							13	20820.1	14985.3		13	19999.4	12782.5		13	21605.6	17382.7		13	20366	14606.4		13	21323.6	18931.9		13	21832	18064.1		13	19488	13989.2		13	17707.4	11688.1		13	18327.1	12287.4		13	19897.3	13986.3		13	18605.9	12238.5
							14	22322.6	16748.4		14	20035.7	13546.9		14	22275	18084		14	20175.4	15454.3		14	22304.4	18265.8		14	21143.8	18713.5		14	19739.4	14315.4		14	18716.6	12389.9		14	18136.2	12147.8		14	19594.5	13721		14	18168.4	12034.6
							15	25514	20331.3		15	21492.6	14918.6		15	22000.9	18030.1		15	19873.8	15874.7		15	23508.2	17221.6		15	20740.8	16856.7		15	19973.9	14778.6		15	19126.8	12977.7		15	17342.2	12479.1		15	19392.9	13396.1		15	18333.8	12650.5
							16	29168.4	24385.8		16	24184.3	17881.9		16	21393.2	17727.5		16	19983.6	14460.2		16	23114.8	16350.8		16	20241.5	15877.2		16	19742.4	15023.3		16	19303.6	13318.2		16	17781.4	12407.9		16	19396.5	12895.1		16	18559.4	12143.7
							17	29957.2	25505.7		17	29004	22734.1		17	20775.4	16735		17	20541.6	14678.2		17	21596.2	14802.4		17	20003.2	16968.9		17	19810.7	15392.9		17	19010	13246.9		17	17979.8	12434.3		17	19370.9	12442.9		17	18771.9	12052.1
							18	29416.7	25697.7		18	34910.7	27562.5		18	20813.9	16000.1		18	19622.7	15737.4		18	20784.9	14046.1		18	19867.4	17572.2		18	19847.1	15246.3		18	18363.8	12658		18	17733.1	12438.1		18	19184.2	12462.7		18	18507.6	11558.2
							19	27290.9	22317.9		19	39262.2	29821.6		19	20695.4	15697.2		19	21090.7	17426.4		19	19937.8	13371.7		19	19649.8	16529.4		19	19603.3	14914.3		19	18015.1	12401.6		19	17455.8	12362.3		19	18934.4	12807.2		19	17818	10922.7
							20	23744.6	17738.8		20	37953.2	27713.4		20	20856	15421.8		20	20852.1	21357.2		20	20281.8	13595.2		20	19466.7	15575.2		20	19704.6	15026.2		20	18092.8	12525.8		20	17601.8	12583.7		20	19095.9	12890.1		20	17310.8	10291.3
							21	21688.2	18468.2		21	37284.2	26686.8		21	21417.7	15490.8		21	21093.1	23995.1		21	20412.5	14133.7		21	19954.9	15409.9		21	19105.1	14708.4		21	18408.3	12024.1		21	17560.1	13006.9		21	18992.2	12638.2		21	17485.3	10036.1
							22	20915.9	19986.7		22	32125.7	23721.7		22	21248.6	15401.8		22	21061.7	29883.4		22	19986.9	14667.1		22	20868.2	16021.3		22	19325.7	14677.6		22	18593.4	12080.1		22	17724.5	13213.8		22	18968.4	12232.6		22	17966.5	10219.9
							23	20682.3	16615		23	25192.2	18919.6		23	21591.4	15018.6		23	20596.3	22865.2		23	20625.2	14789.4		23	21384.8	16517.7		23	20236.5	15313.6		23	18384.7	12508.9		23	17573.7	12913.6		23	19077.7	11906.9		23	18124.4	10837.9
							24	20179.3	14528.8		24	21998.4	15871.8		24	21324.4	15012.9		24	20514.6	19695.4		24	20842.3	14821.2		24	21357.5	15576.5		24	19985.5	15223		24	18611.2	12569.4		24	17442.8	12848.1		24	18129.5	11463.2		24	18412	10942.4
							25	20198.2	14014.1		25	21627.6	15148		25	20292.1	14414.8		25	20074.1	19213.5		25	20621.8	15307		25	21280.3	14443.1		25	19317.4	14690.7		25	18081.9	11855.7		25	17430.3	13019.3		25	18443.6	11848.4		25	18011.3	10937.7
							26	20487.3	13822.2		26	21183	14521.5		26	19630.9	13680.2		26	19799.8	19396.1		26	20943.2	15695.5		26	20708.5	13743.5		26	19366.3	14839		26	17690.7	11964.4		26	17364.1	12789.5		26	18934.2	12715.8		26	17683.9	10707.5
							27	20403.1	13841.5		27	21288.4	14365.7		27	19825.1	13621.9		27	20176.3	16739.4		27	20962.5	15434.3		27	20256	13838.4		27	18929.1	14625.5		27	17950.7	11962.2		27	17306	11923.4		27	18911.2	12853.2		27	18106.3	11031.2
							28	20063.9	13783.9		28	20876.4	15196.1		28	20403.4	13942.7		28	20538.6	15138		28	21281.8	15389.8		28	20064.4	13922.1		28	19320.3	14473.6		28	18015.5	12045.2		28	16728.9	11293.4		28	18622.1	12146.6		28	18376.3	11106.5
							29	20031.3	13933.2		29	20515.6	16525.7		29	20999.9	14388		29	20257.3	14480.6		29	21257.8	14221.5		29	19476.8	12970.6		29	19148.6	14870.7		29	18111.3	11839.3		29	16730	11443.4		29	18051.6	11216.4		29	18332.8	11455.5
							30	20045.8	14403.7		30	20728	17310.9		30	20327.3	14143.8		30	19922.5	14368.6		30	20466.1	13043.1		30	18633.4	12337.6		30	19348.3	16203.4		30	17628	11338.4		30	17497.4	11169.5		30	17965.9	10962.6		30	18045	11691.6
							31	20230.4	14929.7		31	21559.7	17498.7		31	19995.2	14128.1		31	19617.6	13447.5		31	20312.3	13410.1		31	19299	12766.9		31	20120.9	18800.6		31	17922	11511		31	17057.6	10708.4		31	18032.1	10896.5		31	17906.6	11897.3
							32	20194.3	13921.6		32	22166.4	17471.4		32	20527.9	13398.1		32	18753.5	11942.2		32	20784.3	13767		32	19270	13157.5		32	20068.4	17540.7		32	18141	12551.7		32	16691.6	10381.7		32	17991	11091.3		32	17311.3	11713
							33	19936.1	13245.1		33	22291.1	16586.4		33	19745.2	13028.6		33	18336.3	11225		33	20524.1	14179		33	20591.4	13424.8		33	20115.8	15661.3		33	18684.6	13600.5		33	16977	10437.4		33	17569.3	10714.9		33	17099.3	10774.1
							34	19565.2	12910.9		34	21650.1	15549.7		34	20015.9	13495.9		34	18028.9	11247.7		34	20348.7	13965.2		34	21068	14413.1		34	19744.2	15344.3		34	18362.6	12834.4		34	17210.2	11064.8		34	17896.5	10573.9		34	16964.1	10653.6
							35	20100.8	13326		35	21810.5	15541.2		35	20549.4	13510		35	18613	12085.4		35	20488.4	13834		35	20336.9	14150.5		35	19344.6	14951.9		35	17385.2	10946.6		35	17010.3	11331		35	18399	11403.6		35	16883.8	10426.1
							36	20683.1	13397.8		36	21398.2	15353.6		36	20746.8	13893		36	19399.8	12656.8		36	21074.4	14089.2		36	20038.3	14151.5		36	18626.4	14023.7		36	17727.4	11399.6		36	16703.6	10847.6		36	17995	11433.4		36	17974.4	11874.1
							37	20386.8	13134.5		37	21443.4	14366.2		37	20758.3	14149.7		37	19975.7	13240.8		37	20569.8	13380.9		37	20033.7	14532.9		37	18700.8	13561.7		37	17757.8	11834.4		37	16866.3	10447.2		37	18077.6	11682.6		37	18333.6	12366.9
							38	19756	12527.7		38	21387	14680.5		38	20819.6	14008.7		38	20128.2	12894.8		38	19804.6	12154.6		38	20037.4	14400.2		38	18554	13875.1		38	17492.1	11522		38	16942	10617.3		38	18668.9	11852.3		38	18159.1	12602.3
							39	19442	11962.8		39	20773.8	14924.8		39	20991.1	14027.4		39	19947.6	12783		39	19374.6	11673.7		39	19988.3	13613.2		39	18527	14236.7						39	16714.8	10907		39	18841.8	12147		39	19521.5	12373.8
							40	19805.9	12137.7		40	20334.1	14140.7		40	21536	14593.6		40	19794.9	13155.4		40	19037.5	12035		40	20425.8	14011.1		40	19068.7	14448.3						40	16741.4	10951.9		40	18880.9	12112		40	19642.3	12591.1
							41	20112.1	12365.9		41	20634.3	13408.5		41	21976.5	15136						41	18492.2	12084.7		41	20525	15038.1		41	19556.2	14794.8						41	16709	11100.4		41	18762.3	12689.2		41	19688	12713.5
							42	19861.8	12552.1		42	20420.2	13471.1		42	21886.2	15392						42	19259.8	12678.5		42	20471.4	15476.1		42	20346.6	15244.8						42	17157.6	11376.9		42	18885.9	13171
							43	19785.5	12968.2		43	20488.6	13769.6		43	21152.8	15137.1						43	19680.9	13544		43	20868.7	15655.8		43	20271.5	15102						43	17450.6	11800.6		43	19194.8	12383.2
							44	19891.3	12898.3		44	20881.7	13623.1		44	20990.3	14968.4						44	19783.7	13302.3		44	20609.6	15845.4		44	19830.7	15243.8										44	19114.3	12537.1
							45	19980.1	12307.8		45	21454.4	13453.8		45	20938.7	14488.5										45	20875.3	14998.6		45	19772.1	15187.8
							46	20118.9	13167.9		46	21232.3	13002		46	20998.7	14473.8										46	20640.7	14620.9
							47	19872	12765		47	20452.9	12824.3		47	21359.4	15207.3
											48	20004.6	12602.8		48	21518.9	15660.4
											49	20004.2	12239.6		49	21614	16646
											50	20027.4	12564

## Sheet: Y_M1_N159
	File					File	181101_Run8_Nu170_Mlp1_refNup159_FL__1_MMStack_Pos22cell1age2				181101_Run8_Nu170_Mlp1_refNup159_FL__1_MMStack_Pos22cell3age3				181101_Run8_Nu170_Mlp1_refNup159_FL__1_MMStack_Pos22cell5age1				181101_Run8_Nu170_Mlp1_refNup159_FL__1_MMStack_Pos22cell6age1				181101_Run8_Nu170_Mlp1_refNup159_FL__1_MMStack_Pos22cell7age2				181101_Run8_Nu170_Mlp1_refNup159_FL__1_MMStack_Pos23cell1age1				181101_Run8_Nu170_Mlp1_refNup159_FL__1_MMStack_Pos23cell2age1				181101_Run8_Nu170_Mlp1_refNup159_FL__1_MMStack_Pos23cell4age1				181101_Run8_Nu170_Mlp1_refNup159__1_MMStack_Pos24cell3age2				181101_Run8_Nu170_Mlp1_refNup159__1_MMStack_Pos24cell4age1				181101_Run8_Nu170_Mlp1_refNup159__1_MMStack_Pos24cell5age1
	protein	Mlp1				protein	Mlp1				Mlp1				Mlp1				Mlp1				Mlp1				Mlp1				Mlp1				Mlp1				Mlp1				Mlp1				Mlp1
						cluster	0				0				0				0				0				0				0				0				0				0				0
	Cells	33				Cell	1				3				5				6				7				1				2				4				3				4				5
	Age	1				Age	2				3				1				1				2				1				1				1				2				1				1
	correlation	0.625801				correlation	0.701398				0.828577				0.360962				0.283808				0.799543				0.444014				0.621075				0.409253				0.879646				0.82905				0.846655
	GFP	17520.6				GFP	20062.5				20025.9				17852.6				20501.3				19446.6				17455.4				18095.2				18783.5				18333.8				18237.6				18037.3
	stdev	894.773				stdev	665.098				1251.33				428.557				842.007				809.734				936.957				676.379				835.945				953.379				696.452				1237.08
	mCh	10619.7				mCh	11785.3				11194.6				11169.8				11905.3				11520.9				10154.7				10947.6				11021.3				11421.8				11641.7				10431.5
	stdev	734.035				stdev	947.544				1045.47				730.329				573.495				741.42				405.596				474.583				617.759				858.379				967.193				712.83
							0	19042	9801		0	20034	11304		0	17939	11697		0	19212	11838		0	19154	12068		0	17639	9159		0	19118	11264		0	18388	10526		0	17925	11816		0	18563	12776		0	16896	10092
							1	19016.3	10028.5		1	22354	10989		1	17301.2	11496.7		1	19398.1	12220		1	19801.9	11620.4		1	16806	9524		1	18416.3	11273.7		1	18392.2	10378.7		1	18393.7	11939.8		1	18894.4	11958		1	17631.2	10357.3
							2	18782.8	10315.4		2	21424	11837		2	17506.8	11209.9		2	20408.9	12441.3		2	20166.8	11692.9		2	16332	9946		2	18073.2	11763.5		2	18576.7	10212.8		2	19277.2	12157.6		2	18523.9	12079.2		2	18098.6	10184.5
							3	19462.2	10760.7		3	20859	12455		3	18298.9	11904.9		3	21419.7	12271.9		3	19933	11928.9		3	17162.1	9950.1		3	17585.2	11338.9		3	18548.6	10736.9		3	19353.1	11741.6		3	18478.3	11689.8		3	18867.3	10406.3
							4	20397.1	11156.9		4	20634.5	12347.6		4	18978.6	11636.4		4	21401.8	12475.5		4	19400.6	11898.6		4	17513.1	9963.85		4	17688.3	10621.3		4	17983.2	11455.7		4	18358.4	11340.5		4	19076.1	11881.4		4	19469.4	10888.6
							5	20425.4	11674.8		5	21093.8	12645		5	18672.3	11372		5	20790.1	12665.7		5	18378	10898.8		5	17397.4	9952.9		5	16839.8	10359.6		5	17685.5	11646.3		5	17741.8	10913.1		5	18611.8	12071.4		5	19752.3	10816.9
							6	20713.2	12157.7		6	21643.2	13113.9		6	18261.7	11225.6		6	21091.2	12579.5		6	17896.5	10217.7		6	17543.4	10231.6		6	16783.3	10283.6		6	17928.6	11575.5		6	17705.1	10915.7		6	18528.3	11938.1		6	19653.3	10798.5
							7	20763.7	13023.8		7	21480.2	12657.9		7	17712.2	11183.8		7	20993.3	12235		7	18093.7	10771.9		7	17810.6	10545.1		7	16815.3	10086.7		7	18023.5	11402.2		7	18793.5	10696.3		7	19064.7	11071.8		7	20276.3	11353.2
							8	20976.1	13665.7		8	21378.4	11977.6		8	17878.7	11275.6		8	20734.5	12766.4		8	18214.8	10668.5		8	18530.5	10517.4		8	17147.2	9772.4		8	17999.2	11211.9		8	18551.4	11298.9		8	17952.2	10273.3		8	19474.8	10786
							9	20226.3	12560.3		9	20710	11285.4		9	17864.5	11348.6		9	21029	12551.9		9	18360.8	10512.9		9	18343.1	10327.4		9	17912.8	10325.9		9	18301.6	10532.3		9	17631.5	11460		9	17391.5	10046.4		9	18839.2	10350.2
							10	20506.4	12482.6		10	20635.2	11946.7		10	18135.7	11772.8		10	21594.8	12959.5		10	18623.1	10674		10	18339	10757		10	18661.4	10771.4		10	18137.2	9816.17		10	17440.5	10902		10	17341.4	10141		10	18264.8	10494
							11	20641.8	12030.4		11	21172.3	12944		11	18539.5	12207.4		11	21283.5	12309.1		11	18575.2	10711.1		11	18908.8	10421.2		11	18006.1	10976		11	18153.7	9955.12		11	17723.3	10973.8		11	17184.9	10165.5		11	18640.9	10820.3
							12	20804.7	11685.4		12	21680.9	12173.8		12	17961.4	11963.9		12	21528	12121.7		12	18736.9	10857.5		12	18670.1	11035.1		12	17649.2	11680.8		12	17937.1	10140.8		12	18270	11206.8		12	17108.8	10309.3		12	19172	11343.3
							13	20389.8	11365.8		13	19876.5	10823.8		13	17579.4	12193.2		13	21564	12096.1		13	19473.5	11268		13	18384.8	10792.5		13	18185.1	11139.5		13	18281.3	10823.7		13	18526.6	11431.6		13	17302.3	10724.3		13	19226.8	11609.5
							14	19751.3	11259.2		14	19547.7	11093.3		14	17455.5	12275.5		14	21462.2	11512.2		14	19417.3	10844.2		14	17390.7	10343.7		14	18915.1	10779.8		14	18662.3	11333.3		14	18605.6	12086.5		14	17275.7	10541.6		14	18591.2	11432
							15	19496	11323.6		15	18922.9	10543.8		15	17921.3	12030.7		15	21416.3	11441		15	19756.3	11068.9		15	16932.8	9982.17		15	18126.7	10737.6		15	19311.5	12070.1		15	18889.8	12287.4		15	17280.4	10685.4		15	18449.6	11418.9
							16	20140.7	11636.1		16	18546	10739.8		16	17822.1	11329.8		16	21509.7	11099.6		16	20427.8	12173.4		16	16719	9934.53		16	18328.1	11103.9		16	20112.6	11973.6		16	19243.3	12136.5		16	17420.1	11126.2		16	19300.6	11838.9
							17	20293.1	11573		17	18476.6	10603.7		17	17481.7	11480.8		17	21150.8	10852.5		17	19924.7	12522.6		17	16487.4	9851.08		17	19608.5	11643.3		17	20663.4	11581.8		17	19954.1	12440.3		17	17652.1	11375.2		17	18714	10913.7
							18	19885.9	11495		18	17884.3	9820.36		18	17362.5	10813.7		18	20413.4	10828.1		18	19457.7	12033		18	16358.7	10015.1		18	18704.2	11298.1		18	20673.2	11408.6		18	20568.6	13085		18	17924.8	11988.5		18	17669.9	10095.4
							19	20222.1	12185.2		19	17970.2	9453.27		19	17497.4	10467.4		19	20227.3	11283.8		19	19835.8	12722.3		19	16327.4	10258.6		19	18207.6	11248.2		19	20550.3	11684.7		19	20451.7	12996.7		19	17887.9	11549		19	16797.2	9705
							20	21016.7	12785.4		20	18058.4	9576.46		20	17434.9	10162.7		20	20456.4	11534.1		20	20464	13201		20	16489.1	10268.1		20	18297	11223.5		20	19488.8	11646		20	19167.2	12236.2		20	17871.5	11476.3		20	16424.3	9634.63
							21	20570.9	13206.5		21	18142	9713.99		21	16975.8	9639.19		21	20201.7	11646.4		21	20855.2	12468.1		21	16382.5	10338.4		21	18322.5	11250.8		21	19116.4	10690.9		21	18206.2	11580.6		21	18581	11785.2		21	15971	9742.33
							22	19217.7	12453.6		22	18566	9567.85		22	17755.8	10019.1		22	20423.6	12080.9		22	20420.4	11603.4		22	16356.2	10130.5		22	18191.9	10868.6		22	19066	10610.5		22	18112.4	11210.5		22	18822.7	12171.1		22	16283.6	9554.45
							23	19359.1	12034.2		23	18461.3	9775.52		23	17721.8	10188.3		23	20682.8	12220.6		23	20099.4	11494.3		23	16231.1	9569.88		23	17805.6	10703.2		23	19095.9	10605.2		23	17485.5	10799		23	18959.7	12090.2		23	16586.3	9441.24
							24	19462	11973		24	19737.8	10468.1		24	18083.7	10420.1		24	20310.7	11705.7		24	19838.8	11416.4		24	17277.6	10250.7		24	17887.2	10875.3		24	18835	11155.3		24	17589.5	11270.2		24	18544.7	12010.2		24	16677.8	9594.58
											25	20112.9	10577.9		25	18065.5	10313.6		25	20299.7	11591.5		25	19361.7	11453.1		25	18939.1	10496.7		25	17969.3	11362.1		25	18310.1	11542.5		25	17432.7	11075.2		25	18735.6	12889.7		25	16634.6	9794.88
											26	20534.9	10727.2		26	17903.2	10365.5		26	19949.1	11721.9		26	19544.8	11669.5		26	18632.6	10051.2		26	18571.2	11013.6		26	18753.4	11322.4		26	17018.5	9997.56		26	19606.1	14135.2		26	16654	9524.15
											27	20515.5	11096.5		27	17763.7	10642.7		27	19587.3	11875.1		27	20293	12126		27	18848.3	9716.43		27	19053.1	11199.5		27	19044.2	11138.4		27	16743.4	9106.58		27	18932.7	12926		27	17014.5	9430.25
											28	20172.6	11760.8		28	17850.7	11287.6		28	19324.8	11805.4										28	18482.3	10989.4		28	18703	10439.4		28	16874.6	9693.45		28	18727.2	12696.2		28	17185.2	10378
											29	19979.3	11293						29	19263.6	11810.3										29	17504.3	10474.4						29	17234.9	10644.3		29	18747.4	12031.1		29	17901.5	10146.8
											30	20039.4	11803.7						30	19236.5	12095.2																		30	18111.2	11471.6		30	18375.6	12289.7
											31	20186	11111.9						31	19165.8	11639.6																		31	18790.7	11903.1
																			32	19012.1	10598.4																		32	18843.9	12103.4

[truncated: 3 more sheets: Aged_M1_N159, Y_G1_N159, A_G1_N159]
