# Supplementary material for: DNA circles promote yeast ageing in part through stimulating the reorganization of nuclear pore complexes
Source: eLife. 2022 Apr 4;11:e71196. doi: 10.7554/eLife.71196 (PMC9020822; doi:10.7554/eLife.71196)
Supplement: Figure 3—source data 1. [file elife-71196-fig3-data1.xlsx]

## Sheet: Overview
reference
Nup159-mCh
Sgf73Del									Nup170_Sgf73KO	File	190416_Run16_N159_N170_Sgf73D_Fob1D_Br_3_MMStack_Pos2cell2asym_age2	190416_Run16_N159_N170_Sgf73D_Fob1D_Br_3_MMStack_Pos2cell3asym_age2	190416_Run16_N159_N170_Sgf73D_Fob1D_Br_3_MMStack_Pos2cell5asym_age2	190416_Run16_N159_N170_Sgf73D_Fob1D_Br_3_MMStack_Pos2cell7asym_age1	190416_Run16_N159_N170_Sgf73D_Fob1D_Br_3_MMStack_Pos2cell8asym_age3	190416_Run16_N159_N170_Sgf73D_Fob1D_Br_3_MMStack_Pos2cell9asym_age1	190416_Run16_N159_N170_Sgf73D_Fob1D_Br_3_MMStack_Pos2cell10asym_age1	190416_Run16_N159_N170_Sgf73D_Fob1D_Br_3_MMStack_Pos2cell11asym_age2	190416_Run16_N159_N170_Sgf73D_Fob1D_Br_3_MMStack_Pos2cell13asym_age1	190416_Run16_N159_N170_Sgf73D_Fob1D_Br_3_MMStack_Pos2cell14asym_age1	190416_Run16_N159_N170_Sgf73D_Fob1D_Br_3_MMStack_Pos2cell15asym_age1	190416_Run16_N159_N170_Sgf73D_Fob1D_Br_3_MMStack_Pos2cell16asym_age2	190416_Run16_N159_N170_Sgf73D_Fob1D_Br_3_MMStack_Pos2cell17asym_age2	190416_Run16_N159_N170_Sgf73D_Fob1D_Br_3_MMStack_Pos2cell18asym_age0	190416_Run16_N159_N170_Sgf73D_Fob1D_Br_3_MMStack_Pos2cell19asym_age2	190416_Run16_N159_N170_Sgf73D_Fob1D_Br_3_MMStack_Pos2cell20asym_age0	190416_Run16_N159_N170_Sgf73D_Fob1D_Br_3_MMStack_Pos2cell22asym_age1	190416_Run16_N159_N170_Sgf73D_Fob1D_Br_3_MMStack_Pos2cell23asym_age1	190416_Run16_N159_N170_Sgf73D_Fob1D_Br_3_MMStack_Pos2cell24asym_age1	190416_Run16_N159_N170_Sgf73D_Fob1D_Br_3_MMStack_Pos2cell25asym_age1	190416_Run16_N159_N170_Sgf73D_Fob1D_Br_3_MMStack_Pos3cell1asym_age2	190416_Run16_N159_N170_Sgf73D_Fob1D_Br_3_MMStack_Pos3cell2asym_age2	190416_Run16_N159_N170_Sgf73D_Fob1D_Br_3_MMStack_Pos3cell3asym_age2	190416_Run16_N159_N170_Sgf73D_Fob1D_Br_3_MMStack_Pos3cell4asym_age1	190416_Run16_N159_N170_Sgf73D_Fob1D_Br_3_MMStack_Pos3cell5asym_age2	190416_Run16_N159_N170_Sgf73D_Fob1D_Br_3_MMStack_Pos3cell6asym_age1	190416_Run16_N159_N170_Sgf73D_Fob1D_Br_3_MMStack_Pos3cell7asym_age3	190416_Run16_N159_N170_Sgf73D_Fob1D_Br_3_MMStack_Pos3cell8asym_age1	190416_Run16_N159_N170_Sgf73D_Fob1D_Br_3_MMStack_Pos3cell9asym_age2	190416_Run16_N159_N170_Sgf73D_Fob1D_Br_3_MMStack_Pos3cell10asym_age2	190416_Run16_N159_N170_Sgf73D_Fob1D_Br_3_MMStack_Pos4cell1asym_age2	190416_Run16_N159_N170_Sgf73D_Fob1D_Br_3_MMStack_Pos4cell2asym_age2	190416_Run16_N159_N170_Sgf73D_Fob1D_Br_3_MMStack_Pos4cell3asym_age2	190416_Run16_N159_N170_Sgf73D_Fob1D_Br_3_MMStack_Pos4cell4asym_age1
						strain	Nup170_Sgf73KO		Nup170_Sgf73KO	protein	Nup170_Sgf73D	Nup170_Sgf73D	Nup170_Sgf73D	Nup170_Sgf73D	Nup170_Sgf73D	Nup170_Sgf73D	Nup170_Sgf73D	Nup170_Sgf73D	Nup170_Sgf73D	Nup170_Sgf73D	Nup170_Sgf73D	Nup170_Sgf73D	Nup170_Sgf73D	Nup170_Sgf73D	Nup170_Sgf73D	Nup170_Sgf73D	Nup170_Sgf73D	Nup170_Sgf73D	Nup170_Sgf73D	Nup170_Sgf73D	Nup170_Sgf73D	Nup170_Sgf73D	Nup170_Sgf73D	Nup170_Sgf73D	Nup170_Sgf73D	Nup170_Sgf73D	Nup170_Sgf73D	Nup170_Sgf73D	Nup170_Sgf73D	Nup170_Sgf73D	Nup170_Sgf73D	Nup170_Sgf73D	Nup170_Sgf73D	Nup170_Sgf73D
						n	34		Nup170_Sgf73KO
									Nup170_Sgf73KO	Cell	2	3	5	7	8	9	0	1	3	4	5	6	7	8	9	0	2	3	4	5	1	2	3	4	5	6	7	8	9	0	1	2	3	4
						age	2		Nup170_Sgf73KO	Age	2	2	2	1	3	1	1	2	1	1	1	2	2	0	2	0	1	1	1	1	2	2	2	1	2	1	3	1	2	2	2	2	2	1
						avg	median		Nup170_Sgf73KO	correlation	0.596499	0.902187	0.842851	0.636118	0.800021	0.718233	0.831529	0.850712	0.775258	0.744506	0.147491	0.440659	0.750053	0.855407	0.887797	0.93101	0.680953	0.235454	0.879717	0.725784	0.277672	0.841049	0.384845	0.538833	0.754438	0.630797	0.884654	0.893908	0.754795	0.59637	0.651997	0.646638	0.726541	0.804187
					correlation	0.694675	0.74728		Nup170_Sgf73KO	GFP	10402.5	10255.9	9468.14	9081.54	9637.81	11064.5	10475.6	10432.2	11056.4	10947.8	10315.7	9121.64	10318	11024.4	10143.3	11075.3	10411.1	9561.05	10889.3	10521.5	10304.1	10046.9	9948.74	10630.1	9496.85	10301.4	11070.6	10832.9	10768.9	10325.8	10142.9	10704.6	10621.3	9330.46
									Nup170_Sgf73KO	stdev	581.876	575.021	624.002	437.168	543.3	509.252	488.374	546.154	525.923	581.018	469.426	470.246	463.381	493.294	625.605	1005.81	457.101	332.405	478.181	391.888	404.164	466.709	467.863	488.772	624.777	488.164	559.517	565.938	562.225	599.994	518.487	408.535	781.55	268.544
									Nup170_Sgf73KO	mCh	11550.7	11037.6	11145.2	10490.5	10684.2	11803.8	11341	10969.7	11479.3	11349.7	11439.3	10353.2	11451	11950.9	10640.3	12001.6	10746.5	10648.9	10981.6	9698.31	11673.4	10466.7	11068.1	10827.7	10596.1	11069.4	10804.7	11081.1	11183.3	11361.8	11203.7	11039.4	11578.3	10064.5
									Nup170_Sgf73KO	stdev	1039.4	889.036	1075.17	578.89	1222.55	1063.59	956.462	1378.91	829.509	785.333	853.527	878.699	1241.42	1109.05	1117.18	2161.08	961.2	884.847	924.162	668.174	821.71	835.95	1078.84	1147.31	1061.38	1202.94	749.596	811.153	845.441	803.357	1339.09	722.571	1390.58	627.617
									Nup170_Sgf73KO	File	190416_Run16_N159_N170_Sgf73D_Fob1D_Br_3_MMStack_Pos2cell1asym_age20	190416_Run16_N159_N170_Sgf73D_Fob1D_Br_3_MMStack_Pos2cell2asym_age18	190416_Run16_N159_N170_Sgf73D_Fob1D_Br_3_MMStack_Pos2cell3asym_age18	190416_Run16_N159_N170_Sgf73D_Fob1D_Br_3_MMStack_Pos2cell4asym_age7	190416_Run16_N159_N170_Sgf73D_Fob1D_Br_3_MMStack_Pos2cell5asym_age17	190416_Run16_N159_N170_Sgf73D_Fob1D_Br_3_MMStack_Pos2cell6asym_age18	190416_Run16_N159_N170_Sgf73D_Fob1D_Br_3_MMStack_Pos2cell7asym_age18	190416_Run16_N159_N170_Sgf73D_Fob1D_Br_3_MMStack_Pos2cell8asym_age18	190416_Run16_N159_N170_Sgf73D_Fob1D_Br_3_MMStack_Pos2cell9asym_age12	190416_Run16_N159_N170_Sgf73D_Fob1D_Br_3_MMStack_Pos2cell10asym_age18	190416_Run16_N159_N170_Sgf73D_Fob1D_Br_3_MMStack_Pos2cell11asym_age17	190416_Run16_N159_N170_Sgf73D_Fob1D_Br_3_MMStack_Pos2cell13asym_age15	190416_Run16_N159_N170_Sgf73D_Fob1D_Br_3_MMStack_Pos2cell14asym_age18	190416_Run16_N159_N170_Sgf73D_Fob1D_Br_3_MMStack_Pos3cell1asym_age18	190416_Run16_N159_N170_Sgf73D_Fob1D_Br_3_MMStack_Pos3cell2asym_age17	190416_Run16_N159_N170_Sgf73D_Fob1D_Br_3_MMStack_Pos3cell3asym_age19	190416_Run16_N159_N170_Sgf73D_Fob1D_Br_3_MMStack_Pos3cell4asym_age19	190416_Run16_N159_N170_Sgf73D_Fob1D_Br_3_MMStack_Pos3cell5asym_age19	190416_Run16_N159_N170_Sgf73D_Fob1D_Br_3_MMStack_Pos3cell6asym_age20	190416_Run16_N159_N170_Sgf73D_Fob1D_Br_3_MMStack_Pos3cell7asym_age18	190416_Run16_N159_N170_Sgf73D_Fob1D_Br_3_MMStack_Pos3cell8asym_age19	190416_Run16_N159_N170_Sgf73D_Fob1D_Br_3_MMStack_Pos3cell9asym_age19	190416_Run16_N159_N170_Sgf73D_Fob1D_Br_3_MMStack_Pos3cell10asym_age18	190416_Run16_N159_N170_Sgf73D_Fob1D_Br_3_MMStack_Pos3cell11asym_age17	190416_Run16_N159_N170_Sgf73D_Fob1D_Br_3_MMStack_Pos3cell12asym_age18	190416_Run16_N159_N170_Sgf73D_Fob1D_Br_3_MMStack_Pos3cell13asym_age18	190416_Run16_N159_N170_Sgf73D_Fob1D_Br_3_MMStack_Pos3cell14asym_age17	190416_Run16_N159_N170_Sgf73D_Fob1D_Br_3_MMStack_Pos3cell15asym_age17	190416_Run16_N159_N170_Sgf73D_Fob1D_Br_3_MMStack_Pos1cell1asym_age17	190416_Run16_N159_N170_Sgf73D_Fob1D_Br_3_MMStack_Pos1cell2asym_age18	190416_Run16_N159_N170_Sgf73D_Fob1D_Br_3_MMStack_Pos1cell3asym_age18	190416_Run16_N159_N170_Sgf73D_Fob1D_Br_3_MMStack_Pos1cell4asym_age19	190416_Run16_N159_N170_Sgf73D_Fob1D_Br_3_MMStack_Pos1cell6asym_age18	190404_Run15_N159_Nup60_Sgf73D_Br_1_MMStack_Pos9cell3asym_age1	190404_Run15_N159_Nup60_Sgf73D_Br_1_MMStack_Pos9cell4asym_age1	190404_Run15_N159_Nup60_Sgf73D_Br_1_MMStack_Pos9cell5asym_age2
						strain	Nup170_Sgf73KO		Nup170_Sgf73KO	protein	Nup170_Sgf73D	Nup170_Sgf73D	Nup170_Sgf73D	Nup170_Sgf73D	Nup170_Sgf73D	Nup170_Sgf73D	Nup170_Sgf73D	Nup170_Sgf73D	Nup170_Sgf73D	Nup170_Sgf73D	Nup170_Sgf73D	Nup170_Sgf73D	Nup170_Sgf73D	Nup170_Sgf73D	Nup170_Sgf73D	Nup170_Sgf73D	Nup170_Sgf73D	Nup170_Sgf73D	Nup170_Sgf73D	Nup170_Sgf73D	Nup170_Sgf73D	Nup170_Sgf73D	Nup170_Sgf73D	Nup170_Sgf73D	Nup170_Sgf73D	Nup170_Sgf73D	Nup170_Sgf73D	Nup170_Sgf73D	Nup170_Sgf73D	Nup170_Sgf73D	Nup170_Sgf73D	Nup170_Sgf73D	Nup170_Sgf73D	Nup60_Sgf73D	Nup60_Sgf73D	Nup60_Sgf73D
						n	36		Nup170_Sgf73KO
									Nup170_Sgf73KO	Cell	1	2	3	4	5	6	7	8	9	0	1	3	4	1	2	3	4	5	6	7	8	9	0	1	2	3	4	5	1	2	3	4	6	3	4	5
						age	18		Nup170_Sgf73KO	Age	20	18	18	7	17	18	18	18	12	18	17	15	18	18	17	19	19	19	20	18	19	19	18	17	18	18	17	17	17	18	18	19	18	1	1	2
						avg	median		Nup170_Sgf73KO	correlation	0.724871	0.880148	0.714813	0.551182	0.531549	-0.058762	0.757513	0.815168	0.746103	0.464883	0.869352	0.492813	0.864802	0.809871	0.668924	0.843391	0.697069	0.245111	0.172469	0.766551	0.381621	0.384771	0.890967	0.590111	0.897348	0.755766	0.894314	0.684941	0.665203	0.490612	0.44312	0.460647	0.633098	0.789039	0.533765	0.603763
					correlation	0.629359	0.676933		Nup170_Sgf73KO	GFP	10277.5	9756.03	10570	11024	11114.2	10308.7	12078.1	11683.8	11385.2	8631.02	10757.4	10672.5	10693.3	10105.1	10669.2	11525.1	10917.9	9791.91	10373.9	11267.9	10627.3	9225.14	11034.2	9088.37	11613.5	10661.8	11247.3	9635.93	10209.1	11523.6	10273.3	11562.4	10633.7	9205.28	8707.16	8520.62
									Nup170_Sgf73KO	stdev	591.301	718.61	641.936	540.8	458.044	410.701	751.375	855.426	543.754	670.379	856.776	593.548	1011.35	917.736	758.246	894.772	807.072	409.058	625.32	593.485	704.634	374.904	708.52	549.664	637.572	573.818	741.758	571.241	911.357	886.5	737.135	561.706	764.607	507.043	473.664	556.355
									Nup170_Sgf73KO	mCh	11415.6	11503.9	11720.6	13293.3	12712.4	12381	13799.3	12537	12559.2	10383.2	12141.1	13050.6	11621.8	11915.3	12715	13612.9	12679.1	11849	13469.8	12913.1	12003.4	10570.8	13018	10933	13725.1	11454.6	11529.5	11392.6	11853.5	12659.5	12384.4	12569.8	12625.2	10471.1	9661.76	9033.86
									Nup170_Sgf73KO	stdev	948.777	1358.16	949.957	2023.18	1271.68	1384.44	1428.38	1107.39	1097.89	976.071	1980.74	809.512	1437.05	1425.23	1385.19	1986.87	1816.31	756.724	2466.7	1617.95	1616.28	952.661	1636.57	856.132	1392.91	987.522	1194.72	1201.93	1343.01	1153.29	1874.8	679.861	1098.96	541.938	513.048	755.041
										File	190404_Run15_N159_Nup60_Sgf73D_Br_1_MMStack_Pos2cell1asym_age2	190404_Run15_N159_Nup60_Sgf73D_Br_1_MMStack_Pos2cell2asym_age2	190404_Run15_N159_Nup60_Sgf73D_Br_1_MMStack_Pos2cell4asym_age2	190404_Run15_N159_Nup60_Sgf73D_Br_1_MMStack_Pos2cell5asym_age1	190404_Run15_N159_Nup60_Sgf73D_Br_1_MMStack_Pos2cell6asym_age1	190404_Run15_N159_Nup60_Sgf73D_Br_1_MMStack_Pos2cell7asym_age1	190404_Run15_N159_Nup60_Sgf73D_Br_1_MMStack_Pos2cell8asym_age1	190404_Run15_N159_Nup60_Sgf73D_Br_1_MMStack_Pos2cell9asym_age1	190404_Run15_N159_Nup60_Sgf73D_Br_1_MMStack_Pos4cell1asym_age2	190404_Run15_N159_Nup60_Sgf73D_Br_1_MMStack_Pos4cell2asym_age2	190404_Run15_N159_Nup60_Sgf73D_Br_1_MMStack_Pos4cell3asym_age2	190404_Run15_N159_Nup60_Sgf73D_Br_1_MMStack_Pos4cell4asym_age2	190404_Run15_N159_Nup60_Sgf73D_Br_1_MMStack_Pos4cell5asym_age2	190404_Run15_N159_Nup60_Sgf73D_Br_1_MMStack_Pos4cell6asym_age1	190404_Run15_N159_Nup60_Sgf73D_Br_1_MMStack_Pos6cell1asym_age2	190404_Run15_N159_Nup60_Sgf73D_Br_1_MMStack_Pos6cell2asym_age0	190404_Run15_N159_Nup60_Sgf73D_Br_1_MMStack_Pos6cell3asym_age1	190404_Run15_N159_Nup60_Sgf73D_Br_1_MMStack_Pos6cell4asym_age1	190404_Run15_N159_Nup60_Sgf73D_Br_1_MMStack_Pos6cell5asym_age1	190404_Run15_N159_Nup60_Sgf73D_Br_1_MMStack_Pos6cell6asym_age2	190404_Run15_N159_Nup60_Sgf73D_Br_1_MMStack_Pos6cell8asym_age2	190404_Run15_N159_Nup60_Sgf73D_Br_1_MMStack_Pos6cell9asym_age2	190404_Run15_N159_Nup60_Sgf73D_Br_1_MMStack_Pos6cell10asym_age2	190404_Run15_N159_Nup60_Sgf73D_Br_1_MMStack_Pos8cell1asym_age1	190404_Run15_N159_Nup60_Sgf73D_Br_1_MMStack_Pos8cell2asym_age1	190404_Run15_N159_Nup60_Sgf73D_Br_1_MMStack_Pos8cell3asym_age1	190404_Run15_N159_Nup60_Sgf73D_Br_1_MMStack_Pos8cell4asym_age1	190404_Run15_N159_Nup60_Sgf73D_Br_1_MMStack_Pos8cell5asym_age0	190404_Run15_N159_Nup60_Sgf73D_Br_1_MMStack_Pos8cell6asym_age1	190404_Run15_N159_Nup60_Sgf73D_Br_1_MMStack_Pos8cell8asym_age0	190404_Run15_N159_Nup60_Sgf73D_Br_1_MMStack_Pos8cell9asym_age1	190404_Run15_N159_Nup60_Sgf73D_Br_1_MMStack_Pos8cell10asym_age1	190404_Run15_N159_Nup60_Sgf73D_Br_1_MMStack_Pos9cell3asym_age1	190404_Run15_N159_Nup60_Sgf73D_Br_1_MMStack_Pos9cell4asym_age1	190404_Run15_N159_Nup60_Sgf73D_Br_1_MMStack_Pos9cell5asym_age2
						strain	Nup60_Sgf73KO		Nup60_Sgf73KO	protein	Nup60_Sgf73D	Nup60_Sgf73D	Nup60_Sgf73D	Nup60_Sgf73D	Nup60_Sgf73D	Nup60_Sgf73D	Nup60_Sgf73D	Nup60_Sgf73D	Nup60_Sgf73D	Nup60_Sgf73D	Nup60_Sgf73D	Nup60_Sgf73D	Nup60_Sgf73D	Nup60_Sgf73D	Nup60_Sgf73D	Nup60_Sgf73D	Nup60_Sgf73D	Nup60_Sgf73D	Nup60_Sgf73D	Nup60_Sgf73D	Nup60_Sgf73D	Nup60_Sgf73D	Nup60_Sgf73D	Nup60_Sgf73D	Nup60_Sgf73D	Nup60_Sgf73D	Nup60_Sgf73D	Nup60_Sgf73D	Nup60_Sgf73D	Nup60_Sgf73D	Nup60_Sgf73D	Nup60_Sgf73D	Nup60_Sgf73D	Nup60_Sgf73D	Nup60_Sgf73D
						n	35		Nup60_Sgf73KO
									Nup60_Sgf73KO	Cell	1	2	4	5	6	7	8	9	1	2	3	4	5	6	1	2	3	4	5	6	8	9	0	1	2	3	4	5	6	8	9	0	3	4	5
						age	1		Nup60_Sgf73KO	Age	2	2	2	1	1	1	1	1	2	2	2	2	2	1	2	0	1	1	1	2	2	2	2	1	1	1	1	0	1	0	1	1	1	1	2
						avg	median		Nup60_Sgf73KO	correlation	0.370508	0.433982	0.40366	0.760005	0.681207	0.448413	0.889659	0.606866	0.394492	0.501574	0.716844	0.489805	0.614153	0.307202	0.45604	0.669353	0.756756	0.522669	0.389137	0.464463	0.600893	0.135476	0.694479	0.49639	0.695542	0.396594	0.295086	0.287602	0.589489	0.00117708	0.106557	0.419717	0.789039	0.533765	0.603763
					correlation	0.500639	0.49639		Nup60_Sgf73KO	GFP	10182.1	8995.05	9583.08	8961.24	9490.95	8912.05	10212	10187.1	7282.16	8910.38	8725.05	9063.27	9070.83	8973.27	8464.6	8261.43	8294.52	8717.63	8330.17	8688.69	8601.6	7804.85	10134.8	8761.08	8982.76	9582.08	8117.64	8388.31	8542.08	9866.54	7827.38	9142.08	9205.28	8707.16	8520.62
									Nup60_Sgf73KO	stdev	497.371	567.102	468.197	599.527	521.06	478.849	846.894	512.618	417.293	734.359	521.913	412.743	288.971	352.568	778.366	664.345	600.568	485.776	807.803	358.47	501.86	577.075	563.043	653.205	851.773	404.685	586.897	715.086	594.966	574.608	547.122	374.396	507.043	473.664	556.355
									Nup60_Sgf73KO	mCh	10687.7	9678.26	9205.22	9293.47	10280.6	10199.9	10450.6	9828.53	9391.67	9676.36	10236.8	10337.2	9788.57	9663.43	9964.26	9582.98	9131.27	9701.84	9868.31	9472.1	8864.93	9243.01	10551.3	10953.6	9559.89	9842.46	9137	10505.1	9673.12	10659.5	9342.68	9480.58	10471.1	9661.76	9033.86
									Nup60_Sgf73KO	stdev	746.522	852.268	527.339	967.934	668.463	875.55	1026.64	648.958	659.108	614.109	879.822	514.584	491.195	470.608	1262.58	874.766	949.594	666.064	767.168	939.778	858.759	599.127	666.259	534.348	593.086	435.361	804.425	755.234	845.895	561.062	649.334	363.134	541.938	513.048	755.041
										File	190404_Run15_N159_Nup60_Sgf73D_Br_1_MMStack_Pos2cell1asym_age18	190404_Run15_N159_Nup60_Sgf73D_Br_1_MMStack_Pos2cell2asym_age17	190404_Run15_N159_Nup60_Sgf73D_Br_1_MMStack_Pos2cell3asym_age22	190404_Run15_N159_Nup60_Sgf73D_Br_1_MMStack_Pos2cell4asym_age21	190404_Run15_N159_Nup60_Sgf73D_Br_1_MMStack_Pos2cell5asym_age18	190404_Run15_N159_Nup60_Sgf73D_Br_1_MMStack_Pos2cell7asym_age19	190404_Run15_N159_Nup60_Sgf73D_Br_1_MMStack_Pos2cell9asym_age19	190404_Run15_N159_Nup60_Sgf73D_Br_1_MMStack_Pos2cell10asym_age16	190404_Run15_N159_Nup60_Sgf73D_Br_1_MMStack_Pos3cell1asym_age19	190404_Run15_N159_Nup60_Sgf73D_Br_1_MMStack_Pos3cell2asym_age19	190404_Run15_N159_Nup60_Sgf73D_Br_1_MMStack_Pos5cell1asym_age19	190404_Run15_N159_Nup60_Sgf73D_Br_1_MMStack_Pos5cell2asym_age16	190404_Run15_N159_Nup60_Sgf73D_Br_1_MMStack_Pos5cell3asym_age14	190404_Run15_N159_Nup60_Sgf73D_Br_1_MMStack_Pos5cell4asym_age19	190404_Run15_N159_Nup60_Sgf73D_Br_1_MMStack_Pos5cell6asym_age18	190404_Run15_N159_Nup60_Sgf73D_Br_1_MMStack_Pos5cell7asym_age17	190404_Run15_N159_Nup60_Sgf73D_Br_1_MMStack_Pos5cell8asym_age18	190404_Run15_N159_Nup60_Sgf73D_Br_1_MMStack_Pos7cell1asym_age16	190404_Run15_N159_Nup60_Sgf73D_Br_1_MMStack_Pos7cell2asym_age14	190404_Run15_N159_Nup60_Sgf73D_Br_1_MMStack_Pos7cell3asym_age10	190404_Run15_N159_Nup60_Sgf73D_Br_1_MMStack_Pos7cell4asym_age19	190404_Run15_N159_Nup60_Sgf73D_Br_1_MMStack_Pos7cell5asym_age15	190404_Run15_N159_Nup60_Sgf73D_Br_1_MMStack_Pos7cell6asym_age18	190404_Run15_N159_Nup60_Sgf73D_Br_1_MMStack_Pos7cell7asym_age20	190404_Run15_N159_Nup60_Sgf73D_Br_1_MMStack_Pos7cell8asym_age17	190404_Run15_N159_Nup60_Sgf73D_Br_1_MMStack_Pos9cell1asym_age18	190404_Run15_N159_Nup60_Sgf73D_Br_1_MMStack_Pos9cell2asym_age20	190404_Run15_N159_Nup60_Sgf73D_Br_1_MMStack_Pos9cell3asym_age18	190404_Run15_N159_Nup60_Sgf73D_Br_1_MMStack_Pos9cell4asym_age17	190404_Run15_N159_Nup60_Sgf73D_Br_1_MMStack_Pos9cell5asym_age17	190404_Run15_N159_Nup60_Sgf73D_Br_1_MMStack_Pos9cell6asym_age11	190404_Run15_N159_Nup60_Sgf73D_Br_1_MMStack_Pos9cell7asym_age18
						strain	Nup60_Sgf73KO		Nup60_Sgf73KO	protein	Nup60_Sgf73D	Nup60_Sgf73D	Nup60_Sgf73D	Nup60_Sgf73D	Nup60_Sgf73D	Nup60_Sgf73D	Nup60_Sgf73D	Nup60_Sgf73D	Nup60_Sgf73D	Nup60_Sgf73D	Nup60_Sgf73D	Nup60_Sgf73D	Nup60_Sgf73D	Nup60_Sgf73D	Nup60_Sgf73D	Nup60_Sgf73D	Nup60_Sgf73D	Nup60_Sgf73D	Nup60_Sgf73D	Nup60_Sgf73D	Nup60_Sgf73D	Nup60_Sgf73D	Nup60_Sgf73D	Nup60_Sgf73D	Nup60_Sgf73D	Nup60_Sgf73D	Nup60_Sgf73D	Nup60_Sgf73D	Nup60-Fob1D	Nup60-Fob1D	Nup60-Fob1D	Nup60-Fob1D
						n	32		Nup60_Sgf73KO
									Nup60_Sgf73KO	Cell	1	2	3	4	5	7	9	0	1	2	1	2	3	4	6	7	8	1	2	3	4	5	6	7	8	1	2	3	4	5	6	7
						age	18		Nup60_Sgf73KO	Age	18	17	22	21	18	19	19	16	19	19	19	16	14	19	18	17	18	16	14	10	19	15	18	20	17	18	20	18	17	17	11	18
						avg	median		Nup60_Sgf73KO	correlation	0.364401	0.617348	0.539554	0.139051	0.534479	0.723	0.471931	0.236962	0.1116	0.421998	0.439598	0.673292	0.506817	0.692361	0.813067	0.519105	0.382372	0.787117	0.660881	0.609878	0.776803	0.158079	0.394923	0.549989	0.685996	0.53237	0.614812	0.856895	0.634387	0.601346	-0.050557	0.822287
					correlation	0.525692	0.544771		Nup60_Sgf73KO	GFP	9131.06	9131.99	9867.59	9184.64	9417.52	9265.32	10016.4	8143.57	9037.87	9073.06	9137.94	9622.54	9397.11	8615.48	9914.2	9574.87	8711.12	8707.02	7807.26	10483.6	9503.4	9520.68	8752.28	8549.89	10153.6	8828.32	7775.03	9170.1	8401.45	9293.25	10383.5	9999.01
									Nup60_Sgf73KO	stdev	746.1	565.96	559.2	694.426	492.492	656.982	723.131	308.779	518.957	745.589	619.102	676.664	466.589	637.156	453.121	582.426	493.852	608.939	649.992	605.672	600.838	346.701	553.597	604.839	595.279	669.637	366.716	663.995	707.579	610.91	528.249	686.054
									Nup60_Sgf73KO	mCh	11413.4	10980	12333.6	11162.7	11459.4	10655.5	11470.7	9135.5	10869.5	12072.5	10840.2	10889.2	11878.9	10859.1	12132.5	12270.2	10763.2	10756.6	11873.4	12727.1	11577.4	12791.2	11415.2	10390.1	12188.3	11282.5	10814.8	10733.8	11407.9	11369.4	12700.3	10842.7
									Nup60_Sgf73KO	stdev	852.213	998.963	908.445	1391.43	779.922	1165.38	1667.27	1181.02	1413.18	1162.11	865.787	459.601	1069.54	847.966	1380.53	1089.09	1194.23	996.555	1401.92	1668.45	1115.97	2413.06	1295.37	993.344	1049.39	832.637	682.452	1232.28	1525.82	1067.66	1487.5	896.771
Fob1Del									Nup170_Fob1	File	191023_Run22_N159_N170_Sgf73D_Fob1D_Fl_1_MMStack_Pos2cell2asym_age2	191023_Run22_N159_N170_Sgf73D_Fob1D_Fl_1_MMStack_Pos2cell4asym_age1	191023_Run22_N159_N170_Sgf73D_Fob1D_Fl_1_MMStack_Pos2cell7asym_age3	191023_Run22_N159_N170_Sgf73D_Fob1D_Fl_1_MMStack_Pos2cell9asym_age2	191023_Run22_N159_N170_Sgf73D_Fob1D_Fl_1_MMStack_Pos2cell11asym_age1	191023_Run22_N159_N170_Sgf73D_Fob1D_Fl_1_MMStack_Pos2cell13asym_age0	191023_Run22_N159_N170_Sgf73D_Fob1D_Fl_1_MMStack_Pos2cell15asym_age2	191023_Run22_N159_N170_Sgf73D_Fob1D_Fl_1_MMStack_Pos2cell17asym_age2	191023_Run22_N159_N170_Sgf73D_Fob1D_Br_1_MMStack_Pos3cell2asym_age1	191023_Run22_N159_N170_Sgf73D_Fob1D_Br_1_MMStack_Pos3cell5asym_age2	191023_Run22_N159_N170_Sgf73D_Fob1D_Br_1_MMStack_Pos3cell7asym_age2	191023_Run22_N159_N170_Sgf73D_Fob1D_Br_1_MMStack_Pos3cell9asym_age2	191023_Run22_N159_N170_Sgf73D_Fob1D_Br_1_MMStack_Pos3cell11asym_age1	191023_Run22_N159_N170_Sgf73D_Fob1D_Br_1_MMStack_Pos3cell13asym_age3	191023_Run22_N159_N170_Sgf73D_Fob1D_Br_1_MMStack_Pos3cell15asym_age2	191023_Run22_N159_N170_Sgf73D_Fob1D_Br_1_MMStack_Pos4cell2asym_age0	191023_Run22_N159_N170_Sgf73D_Fob1D_Br_1_MMStack_Pos4cell4asym_age1	191023_Run22_N159_N170_Sgf73D_Fob1D_Br_1_MMStack_Pos4cell6asym_age1	191023_Run22_N159_N170_Sgf73D_Fob1D_Br_1_MMStack_Pos4cell8asym_age0	191023_Run22_N159_N170_Sgf73D_Fob1D_Br_1_MMStack_Pos4cell11asym_age1	191023_Run22_N159_N170_Sgf73D_Fob1D_Br_1_MMStack_Pos4cell14asym_age1	191023_Run22_N159_N170_Sgf73D_Fob1D_Br_1_MMStack_Pos5cell2asym_age1	191023_Run22_N159_N170_Sgf73D_Fob1D_Br_1_MMStack_Pos5cell4asym_age1	191023_Run22_N159_N170_Sgf73D_Fob1D_Br_1_MMStack_Pos5cell6asym_age2	191023_Run22_N159_N170_Sgf73D_Fob1D_Br_1_MMStack_Pos5cell8asym_age2	191023_Run22_N159_N170_Sgf73D_Fob1D_Br_1_MMStack_Pos5cell12asym_age2	191023_Run22_N159_N170_Sgf73D_Fob1D_Br_1_MMStack_Pos6cell2asym_age1	191023_Run22_N159_N170_Sgf73D_Fob1D_Br_1_MMStack_Pos6cell4asym_age3	191023_Run22_N159_N170_Sgf73D_Fob1D_Br_1_MMStack_Pos6cell6asym_age2	191023_Run22_N159_N170_Sgf73D_Fob1D_Br_1_MMStack_Pos6cell9asym_age2	191023_Run22_N159_N170_Sgf73D_Fob1D_Br_1_MMStack_Pos6cell11asym_age1
						strain	Nup170_Fob1		Nup170_Fob1	protein	Nup170_Fob1D	Nup170_Fob1D	Nup170_Fob1D	Nup170_Fob1D	Nup170_Fob1D	Nup170_Fob1D	Nup170_Fob1D	Nup170_Fob1D	Nup170_Fob1D	Nup170_Fob1D	Nup170_Fob1D	Nup170_Fob1D	Nup170_Fob1D	Nup170_Fob1D	Nup170_Fob1D	Nup170_Fob1D	Nup170_Fob1D	Nup170_Fob1D	Nup170_Fob1D	Nup170_Fob1D	Nup170_Fob1D	Nup170_Fob1D	Nup170_Fob1D	Nup170_Fob1D	Nup170_Fob1D	Nup170_Fob1D	Nup170_Fob1D	Nup170_Fob1D	Nup170_Fob1D	Nup170_Fob1D	Nup170_Fob1D
						n	31		Nup170_Fob1
									Nup170_Fob1	Cell	2	4	7	9	1	3	5	7	2	5	7	9	1	3	5	2	4	6	8	1	4	2	4	6	8	2	2	4	6	9	1
						age	2		Nup170_Fob1	Age	2	1	3	2	1	0	2	2	1	2	2	2	1	3	2	0	1	1	0	1	1	1	1	2	2	2	1	3	2	2	1
						avg	median		Nup170_Fob1	correlation	0.452924	0.803206	0.534241	0.571793	0.838396	0.675115	0.402844	0.671047	0.674178	0.702448	0.545113	0.645061	0.892391	0.935835	0.492154	0.842071	0.870783	0.577744	0.545325	0.796574	0.307096	0.657383	0.834057	0.631437	0.612787	0.575459	0.875716	0.733424	0.865656	0.898874	0.774954
					correlation	0.685035	0.674178		Nup170_Fob1	GFP	8918.94	9877.07	11075.6	9935.8	8901.57	10113.3	8875.64	9789.24	9701.26	7509.43	7385.76	9723.27	9536.54	9273.45	8893.25	7495.06	8874.56	9163.64	9590.7	9975.82	8104.44	8556.57	8977.09	8924.58	9825.44	8273.93	10032.7	8784.15	10091.9	9866.05	9342.35
									Nup170_Fob1	stdev	309.322	276.222	360.491	243.443	264.1	235.326	181.397	301.5	406.974	289.754	259.477	336.328	385.179	358.399	311.228	288.83	307.182	223.714	283.355	322.873	154.014	261.973	414.487	371.553	225.132	200.076	357.753	300.101	350.698	253.482	372.433
									Nup170_Fob1	mCh	9863.1	10553	11388.8	10031.3	9921.76	10569.2	9644.86	10295.2	10268	9075.89	9040.74	10059.8	9898.61	9657.59	9424.27	8755.93	9307.54	9872.92	10344.5	10378	8051.99	9139.77	10358.3	9537.23	10184.5	8620.56	11279.1	9334.3	9536.46	10006.8	9829.71
									Nup170_Fob1	stdev	833.669	883.936	790.957	530.035	855.608	681.229	656.397	624.737	915.915	1012.91	708.551	805.378	1174.48	961.225	873.902	899.208	782.42	585.9	689.525	1024.6	346.821	936.274	913.653	855.143	583.261	515.206	1310.34	492.519	1009.16	660.634	739.239
									Nup170_Fob1	File	190426_Run17_N159_N170_Fob1D_Br_1_MMStack_Pos1cell1asym_age13	191023_Run22_N159_N170_Sgf73D_Fob1D_Fl_1_MMStack_Pos2cell3asym_age23	191023_Run22_N159_N170_Sgf73D_Fob1D_Fl_1_MMStack_Pos2cell6asym_age23	191023_Run22_N159_N170_Sgf73D_Fob1D_Fl_1_MMStack_Pos2cell8asym_age22	191023_Run22_N159_N170_Sgf73D_Fob1D_Fl_1_MMStack_Pos2cell10asym_age21	191023_Run22_N159_N170_Sgf73D_Fob1D_Fl_1_MMStack_Pos2cell12asym_age22	191023_Run22_N159_N170_Sgf73D_Fob1D_Fl_1_MMStack_Pos2cell14asym_age23	191023_Run22_N159_N170_Sgf73D_Fob1D_Fl_1_MMStack_Pos2cell16asym_age24	191023_Run22_N159_N170_Sgf73D_Fob1D_Br_1_MMStack_Pos3cell1asym_age24	191023_Run22_N159_N170_Sgf73D_Fob1D_Br_1_MMStack_Pos3cell4asym_age25	191023_Run22_N159_N170_Sgf73D_Fob1D_Br_1_MMStack_Pos3cell6asym_age23	191023_Run22_N159_N170_Sgf73D_Fob1D_Br_1_MMStack_Pos3cell8asym_age23	191023_Run22_N159_N170_Sgf73D_Fob1D_Br_1_MMStack_Pos3cell10asym_age24	191023_Run22_N159_N170_Sgf73D_Fob1D_Br_1_MMStack_Pos3cell12asym_age25	191023_Run22_N159_N170_Sgf73D_Fob1D_Br_1_MMStack_Pos3cell14asym_age21	191023_Run22_N159_N170_Sgf73D_Fob1D_Br_1_MMStack_Pos4cell1asym_age22	191023_Run22_N159_N170_Sgf73D_Fob1D_Br_1_MMStack_Pos4cell3asym_age24	191023_Run22_N159_N170_Sgf73D_Fob1D_Br_1_MMStack_Pos4cell5asym_age23	191023_Run22_N159_N170_Sgf73D_Fob1D_Br_1_MMStack_Pos4cell7asym_age23	191023_Run22_N159_N170_Sgf73D_Fob1D_Br_1_MMStack_Pos4cell10asym_age25	191023_Run22_N159_N170_Sgf73D_Fob1D_Br_1_MMStack_Pos4cell13asym_age23	191023_Run22_N159_N170_Sgf73D_Fob1D_Br_1_MMStack_Pos5cell1asym_age22	191023_Run22_N159_N170_Sgf73D_Fob1D_Br_1_MMStack_Pos5cell3asym_age15	191023_Run22_N159_N170_Sgf73D_Fob1D_Br_1_MMStack_Pos5cell5asym_age22	191023_Run22_N159_N170_Sgf73D_Fob1D_Br_1_MMStack_Pos5cell7asym_age22	191023_Run22_N159_N170_Sgf73D_Fob1D_Br_1_MMStack_Pos5cell9asym_age25	191023_Run22_N159_N170_Sgf73D_Fob1D_Br_1_MMStack_Pos6cell1asym_age13	191023_Run22_N159_N170_Sgf73D_Fob1D_Br_1_MMStack_Pos6cell3asym_age24	191023_Run22_N159_N170_Sgf73D_Fob1D_Br_1_MMStack_Pos6cell5asym_age23	191023_Run22_N159_N170_Sgf73D_Fob1D_Br_1_MMStack_Pos6cell7asym_age17	191023_Run22_N159_N170_Sgf73D_Fob1D_Br_1_MMStack_Pos6cell10asym_age21
						strain	Nup170_Fob1		Nup170_Fob1	protein	Nup170-Fob1D	Nup170-Fob1D	Nup170-Fob1D	Nup170-Fob1D	Nup170-Fob1D	Nup170-Fob1D	Nup170-Fob1D	Nup170-Fob1D	Nup170-Fob1D	Nup170-Fob1D	Nup170-Fob1D	Nup170-Fob1D	Nup170-Fob1D	Nup170-Fob1D	Nup170-Fob1D	Nup170-Fob1D	Nup170-Fob1D	Nup170-Fob1D	Nup170-Fob1D	Nup170-Fob1D	Nup170-Fob1D	Nup170-Fob1D	Nup170-Fob1D	Nup170-Fob1D	Nup170-Fob1D	Nup170-Fob1D	Nup170-Fob1D	Nup170-Fob1D	Nup170-Fob1D	Nup170-Fob1D	Nup170-Fob1D
						n	31		Nup170_Fob1
									Nup170_Fob1	Cell	1	3	6	8	0	2	4	6	1	4	6	8	0	2	4	1	3	5	7	0	3	1	3	5	7	9	1	3	5	7	0
						age	23		Nup170_Fob1	Age	13	23	23	22	21	22	23	24	24	25	23	23	24	25	21	22	24	23	23	25	23	22	15	22	22	25	13	24	23	17	21
						avg	median		Nup170_Fob1	correlation	0.524395	0.82465	0.729426	0.64986	0.766358	0.610081	0.888555	0.643683	0.341892	0.505558	0.785988	0.706725	0.43197	0.660549	0.53724	0.804703	0.652702	0.547643	0.66918	0.813619	0.833342	0.589536	0.679912	0.472373	0.76171	0.686342	0.735341	0.72001	0.899625	0.741954	0.595436
					correlation	0.671302	0.679912		Nup170_Fob1	GFP	8685.45	9597.05	10412.2	10069.2	9606.76	10275.7	8909.71	9136.71	9667.36	7250.1	9552.84	8944.09	9834.97	9566.28	8445.92	8328.59	9144.69	9183.47	10091.6	9646	8574.4	9636.52	9839.91	8941.09	10087.4	9253.58	9791.14	10029.7	10592.6	10301.1	9711.24
									Nup170_Fob1	stdev	335.874	214.689	268.269	273.113	269.694	318.377	404.374	291.225	320.75	215.871	262.502	357.878	245.212	230.912	277.646	443.27	300.567	360.275	251.034	262.795	407.115	416.24	479.35	298.532	450.852	316.724	220.756	399.428	425.281	271.838	342.319
									Nup170_Fob1	mCh	13285.9	11567.6	11118.5	11850.4	11616.9	10308.8	10065.3	10626.9	10936.5	8972	10476.6	11644.8	10670.4	10218.4	10173.6	9970.73	10554.3	10597.2	11458.6	10453.3	9648.49	11971.6	13508.7	9895.51	11448.2	10569.5	11692.8	13715.1	13128.9	12338.6	12723.6
									Nup170_Fob1	stdev	1341.49	739.617	575.226	876.965	928.069	537.549	957.804	1030	833.536	820.346	644.076	798.06	782.656	673.73	1063.12	1123.99	527.326	962.195	544.552	723.152	1266.5	1228.54	1427.87	421.383	1024.2	670.211	768.467	1085.42	1336.75	1011.92	1375.61
										File	190306_Run13_RefN159_Nup60_Fob1D_Br_1_MMStack_Pos7cell1asym_age2	190306_Run13_RefN159_Nup60_Fob1D_Br_1_MMStack_Pos7cell2asym_age2	190306_Run13_RefN159_Nup60_Fob1D_Br_1_MMStack_Pos8cell1asym_age3	190306_Run13_RefN159_Nup60_Fob1D_Br_1_MMStack_Pos8cell2asym_age2	190306_Run13_RefN159_Nup60_Fob1D_Br_1_MMStack_Pos8cell3asym_age2	190306_Run13_RefN159_Nup60_Fob1D_Br_1_MMStack_Pos8cell4asym_age2	190306_Run13_RefN159_Nup60_Fob1D_Br_1_MMStack_Pos8cell6asym_age2	190306_Run13_RefN159_Nup60_Fob1D_Br_1_MMStack_Pos8cell7asym_age2	190306_Run13_RefN159_Nup60_Fob1D_Br_1_MMStack_Pos8cell8asym_age2	190306_Run13_RefN159_Nup60_Fob1D_Br_1_MMStack_Pos8cell9asym_age2	190306_Run13_RefN159_Nup60_Fob1D_Br_1_MMStack_Pos8cell10asym_age2	190306_Run13_RefN159_Nup60_Fob1D_Br_1_MMStack_Pos8cell11asym_age2	190306_Run13_RefN159_Nup60_Fob1D_Br_1_MMStack_Pos8cell12asym_age3	190306_Run13_RefN159_Nup60_Fob1D_Br_1_MMStack_Pos8cell13asym_age3	190306_Run13_RefN159_Nup60_Fob1D_Br_1_MMStack_Pos8cell14asym_age2	190306_Run13_RefN159_Nup60_Fob1D_Br_1_MMStack_Pos12cell1asym_age2	190306_Run13_RefN159_Nup60_Fob1D_Br_1_MMStack_Pos12cell2asym_age3	190306_Run13_RefN159_Nup60_Fob1D_Br_1_MMStack_Pos12cell3asym_age0	190306_Run13_RefN159_Nup60_Fob1D_Br_1_MMStack_Pos12cell4asym_age2	190306_Run13_RefN159_Nup60_Fob1D_Br_1_MMStack_Pos12cell5asym_age2	190306_Run13_RefN159_Nup60_Fob1D_Br_1_MMStack_Pos12cell6asym_age2	190306_Run13_RefN159_Nup60_Fob1D_Br_1_MMStack_Pos12cell7asym_age1	190306_Run13_RefN159_Nup60_Fob1D_Br_1_MMStack_Pos21cell1asym_age1	190306_Run13_RefN159_Nup60_Fob1D_Br_1_MMStack_Pos21cell2asym_age1	190306_Run13_RefN159_Nup60_Fob1D_Br_1_MMStack_Pos22cell1asym_age2	190306_Run13_RefN159_Nup60_Fob1D_Br_1_MMStack_Pos27cell1asym_age1	190306_Run13_RefN159_Nup60_Fob1D_Br_1_MMStack_Pos27cell2asym_age2	190306_Run13_RefN159_Nup60_Fob1D_Br_1_MMStack_Pos27cell3asym_age3	190306_Run13_RefN159_Nup60_Fob1D_Br_1_MMStack_Pos27cell5asym_age1	190306_Run13_RefN159_Nup60_Fob1D_Br_1_MMStack_Pos27cell6asym_age2	190306_Run13_RefN159_Nup60_Fob1D_Br_1_MMStack_Pos27cell8asym_age2	190306_Run13_RefN159_Nup60_Fob1D_Br_1_MMStack_Pos27cell9asym_age1	190306_Run13_RefN159_Nup60_Fob1D_Br_1_MMStack_Pos27cell10asym_age0
						strain	Nup60_Fob1D		Nup60_Fob1D	protein	Nup60-Fob1D	Nup60-Fob1D	Nup60-Fob1D	Nup60-Fob1D	Nup60-Fob1D	Nup60-Fob1D	Nup60-Fob1D	Nup60-Fob1D	Nup60-Fob1D	Nup60-Fob1D	Nup60-Fob1D	Nup60-Fob1D	Nup60-Fob1D	Nup60-Fob1D	Nup60-Fob1D	Nup60-Fob1D	Nup60-Fob1D	Nup60-Fob1D	Nup60-Fob1D	Nup60-Fob1D	Nup60-Fob1D	Nup60-Fob1D	Nup60-Fob1D	Nup60-Fob1D	Nup60-Fob1D	Nup60-Fob1D	Nup60-Fob1D	Nup60-Fob1D	Nup60-Fob1D	Nup60-Fob1D	Nup60-Fob1D	Nup60-Fob1D	Nup60-Fob1D
						n	33		Nup60_Fob1D
									Nup60_Fob1D	Cell	1	2	1	2	3	4	6	7	8	9	0	1	2	3	4	1	2	3	4	5	6	7	1	2	1	1	2	3	5	6	8	9	0
						age	2		Nup60_Fob1D	Age	2	2	3	2	2	2	2	2	2	2	2	2	3	3	2	2	3	0	2	2	2	1	1	1	2	1	2	3	1	2	2	1	0
						avg	median		Nup60_Fob1D	correlation	0.221972	0.345179	0.772365	0.783517	0.592578	0.912073	0.740784	0.653933	0.624535	0.382941	0.777143	0.630978	0.794384	0.863251	0.584101	0.519607	0.191057	0.277556	0.629554	0.716971	0.763592	0.448081	0.37178	0.63083	0.406596	0.571628	0.41707	0.557595	0.758487	0.849666	0.788735	-0.04056	0.615151
					correlation	0.580398	0.624535		Nup60_Fob1D	GFP	9940.51	10332.7	10025.5	10916.7	10147	9833.66	10243.8	11102.6	11364.4	9888.64	10596.6	10875.5	10741.2	10192.6	11447.5	10406.8	11184.7	10172.3	10342	10777	10654.4	10660.9	10676.6	10759.2	10624.9	9638.57	9995.91	10225.6	11067.5	9578.26	9886.68	10504.6	9803.61
									Nup60_Fob1D	stdev	961.112	593.602	750.01	870.462	888.604	858.621	663.286	565.869	704.694	563.653	922.892	548.898	503.358	516.788	656.334	673.867	525.39	602.565	1009.63	751.744	452.124	426.004	535.43	868.296	548.585	676.506	798.234	471.683	1216.49	648.637	781.068	403.13	787.885
									Nup60_Fob1D	mCh	9549.25	10541.9	10098.8	9931.98	10455.5	9551.19	10083.3	9785.44	10988.6	9678.01	9124.04	9602.16	9085.73	9316.62	10471.7	10022.7	10766.6	10165.1	9816.62	10277	9344.6	9459.09	9764.97	10422.9	8879.06	9578.95	9938.87	9543.55	10098.7	8625.39	9191.71	9530.59	10550.7
									Nup60_Fob1D	stdev	854.255	699.419	733.444	548.323	770.155	772.477	726.331	557.261	485.106	579.675	613.187	406.216	390.859	558.613	524.807	616.029	327.237	660.584	733.839	686.666	460.832	303.754	861.988	649.894	433.095	768.806	599.214	586.266	927.599	737.754	629.713	508.83	650.173
										File	190306_Run13_RefN159_Nup60_Fob1D_Br_1_MMStack_Pos7cell1asym_age24	190306_Run13_RefN159_Nup60_Fob1D_Br_1_MMStack_Pos7cell2asym_age26	190306_Run13_RefN159_Nup60_Fob1D_Br_1_MMStack_Pos7cell3asym_age25	190306_Run13_RefN159_Nup60_Fob1D_Br_1_MMStack_Pos7cell4asym_age24	190306_Run13_RefN159_Nup60_Fob1D_Br_1_MMStack_Pos7cell5asym_age24	190306_Run13_RefN159_Nup60_Fob1D_Br_1_MMStack_Pos7cell6asym_age25	190306_Run13_RefN159_Nup60_Fob1D_Br_1_MMStack_Pos7cell7asym_age24	190306_Run13_RefN159_Nup60_Fob1D_Br_1_MMStack_Pos8cell1asym_age24	190306_Run13_RefN159_Nup60_Fob1D_Br_1_MMStack_Pos8cell2asym_age24	190306_Run13_RefN159_Nup60_Fob1D_Br_1_MMStack_Pos8cell3asym_age24	190306_Run13_RefN159_Nup60_Fob1D_Br_1_MMStack_Pos8cell4asym_age24	190306_Run13_RefN159_Nup60_Fob1D_Br_1_MMStack_Pos8cell5asym_age25	190306_Run13_RefN159_Nup60_Fob1D_Br_1_MMStack_Pos19cell1asym_age26	190306_Run13_RefN159_Nup60_Fob1D_Br_1_MMStack_Pos19cell3asym_age24	190306_Run13_RefN159_Nup60_Fob1D_Br_1_MMStack_Pos19cell4asym_age24	190306_Run13_RefN159_Nup60_Fob1D_Br_1_MMStack_Pos19cell5asym_age22	190306_Run13_RefN159_Nup60_Fob1D_Br_1_MMStack_Pos19cell6asym_age23	190306_Run13_RefN159_Nup60_Fob1D_Br_1_MMStack_Pos19cell7asym_age26	190306_Run13_RefN159_Nup60_Fob1D_Br_1_MMStack_Pos23cell1asym_age25	190306_Run13_RefN159_Nup60_Fob1D_Br_1_MMStack_Pos23cell2asym_age24	190306_Run13_RefN159_Nup60_Fob1D_Br_1_MMStack_Pos23cell3asym_age22	190306_Run13_RefN159_Nup60_Fob1D_Br_1_MMStack_Pos23cell4asym_age25	190306_Run13_RefN159_Nup60_Fob1D_Br_1_MMStack_Pos23cell5asym_age26	190306_Run13_RefN159_Nup60_Fob1D_Br_1_MMStack_Pos28cell1asym_age25	190306_Run13_RefN159_Nup60_Fob1D_Br_1_MMStack_Pos28cell3asym_age23	190306_Run13_RefN159_Nup60_Fob1D_Br_1_MMStack_Pos28cell4asym_age27	190306_Run13_RefN159_Nup60_Fob1D_Br_1_MMStack_Pos28cell5asym_age27	190306_Run13_RefN159_Nup60_Fob1D_Br_1_MMStack_Pos28cell6asym_age24	190306_Run13_RefN159_Nup60_Fob1D_Fl_1_MMStack_Pos33cell1asym_age23	190306_Run13_RefN159_Nup60_Fob1D_Br_1_MMStack_Pos33cell2asym_age24	190306_Run13_RefN159_Nup60_Fob1D_Br_1_MMStack_Pos34cell1asym_age25	190306_Run13_RefN159_Nup60_Fob1D_Br_1_MMStack_Pos34cell2asym_age23	190306_Run13_RefN159_Nup60_Fob1D_Br_1_MMStack_Pos34cell3asym_age24	190306_Run13_RefN159_Nup60_Fob1D_Br_1_MMStack_Pos34cell4asym_age23
						strain	Nup60_Fob1D		Nup60_Fob1D	protein	Nup60-Fob1D	Nup60-Fob1D	Nup60-Fob1D	Nup60-Fob1D	Nup60-Fob1D	Nup60-Fob1D	Nup60-Fob1D	Nup60-Fob1D	Nup60-Fob1D	Nup60-Fob1D	Nup60-Fob1D	Nup60-Fob1D	Nup60-Fob1D	Nup60-Fob1D	Nup60-Fob1D	Nup60-Fob1D	Nup60-Fob1D	Nup60-Fob1D	Nup60-Fob1D	Nup60-Fob1D	Nup60-Fob1D	Nup60-Fob1D	Nup60-Fob1D	Nup60-Fob1D	Nup60-Fob1D	Nup60-Fob1D	Nup60-Fob1D	Nup60-Fob1D	Nup60-Fob1D	Nup60-Fob1D	Nup60-Fob1D	Nup60-Fob1D	Nup60-Fob1D	Nup60-Fob1D
						n	34		Nup60_Fob1D		x	x	x	x	x	x	x	x	x	x	x	x	x	x	x	x	x	x	x	x	x	x	x	x	x	x	x	x	x	x	x	x	x	x
									Nup60_Fob1D	Cell	1	2	3	4	5	6	7	1	2	3	4	5	1	3	4	5	6	7	1	2	3	4	5	1	3	4	5	6	1	2	1	2	3	4
						age	24		Nup60_Fob1D	Age	24	26	25	24	24	25	24	24	24	24	24	25	26	24	24	22	23	26	25	24	22	25	26	25	23	27	27	24	23	24	25	23	24	23
						avg	median		Nup60_Fob1D	correlation	0.715594	0.727922	0.544746	0.473165	0.704042	0.625265	0.129929	-0.100719	0.416394	0.498589	0.683112	0.481268	0.731096	0.42722	0.500063	0.591447	0.65845	0.633292	0.419285	0.292923	0.0693045	0.493192	0.474406	0.569296	0.561136	0.511311	0.410769	0.644827	0.639914	0.333625	0.383426	0.928694	0.7768	0.451768
					correlation	0.51181	0.505687		Nup60_Fob1D	GFP	9387.43	9958.64	9069.07	8827.49	10142.9	10893.1	11523.2	8554.37	9942.77	9293.92	10585.7	9514.34	9280.2	9527.36	11190.3	9063.13	10864.1	10530.6	11288	9645.26	10393.6	10019.2	10369.6	10139.6	9974.86	10101.5	11143.5	9712.69	10447	9605.34	10559.6	11957.4	11513.1	11020
									Nup60_Fob1D	stdev	708.623	884.421	463.826	431.013	568.896	713.773	404.11	460.185	706.003	626.461	713.398	556.277	582.705	502.608	695.577	412.049	660.685	599.035	552.072	407.779	498.992	843.83	820.709	1048.93	616.889	988.002	366.091	869.219	872.757	522.573	678.582	797.417	796.47	628.354
									Nup60_Fob1D	mCh	9823.43	11131	9638.06	10209.5	10041.5	11661.4	12413.5	9975.1	11091.7	10233.7	11164.4	10257.3	10239.7	10251.7	11894.5	11326	10624.6	11437.3	10765	10605.3	10563.3	10832.6	10170.1	10613	10268.8	10775.5	10614.3	10733	10437.9	10440.8	11263.2	12761.5	11557.7	11337.7
									Nup60_Fob1D	stdev	656.104	849.152	625.371	773.407	486.422	716.889	515.021	784.999	811.296	937.918	794.968	1025.78	643.995	1006.22	794.746	1260.66	564.211	785.13	688.91	687.693	776.447	1178.55	870.86	1022.16	905.204	731.2	749.785	871.157	760.935	1128.03	1079.5	1215.49	1063.72	1065.57
										File	200910_Run25_Fob1Mlp1-2_Fl_1_MMStack_Pos1cell3age1	200910_Run25_Fob1Mlp1-2_Fl_1_MMStack_Pos1cell5age1	200910_Run25_Fob1Mlp1-2_Fl_1_MMStack_Pos1cell7age1	200910_Run25_Fob1Mlp1-2_Fl_1_MMStack_Pos1cell10age1	200910_Run25_Fob1Mlp1-2_Fl_1_MMStack_Pos1cell13age1	200910_Run25_Fob1Mlp1-2_Fl_1_MMStack_Pos1cell15age0	200910_Run25_Fob1Mlp1-2_Fl_1_MMStack_Pos1cell18age2	200910_Run25_Fob1Mlp1-2_Fl_1_MMStack_Pos1cell20age2	200910_Run25_Fob1Mlp1-2_Fl_1_MMStack_Pos1cell22age1	200910_Run25_Fob1Mlp1-2_Fl_1_MMStack_Pos1cell24age1	200910_Run25_Fob1Mlp1-2_Fl_1_MMStack_Pos1cell27age2	200910_Run25_Fob1Mlp1-2_Fl_1_MMStack_Pos2cell1age0	200910_Run25_Fob1Mlp1-2_Fl_1_MMStack_Pos2cell5age1	200910_Run25_Fob1Mlp1-2_Fl_1_MMStack_Pos2cell7age1	200910_Run25_Fob1Mlp1-2_Fl_1_MMStack_Pos2cell9age1	200910_Run25_Fob1Mlp1-2_Fl_1_MMStack_Pos2cell11age0	200910_Run25_Fob1Mlp1-2_Fl_1_MMStack_Pos2cell13age1	200910_Run25_Fob1Mlp1-2_Fl_1_MMStack_Pos2cell15age1	200910_Run25_Fob1Mlp1-2_Fl_1_MMStack_Pos2cell17age1	200910_Run25_Fob1Mlp1-2_Fl_1_MMStack_Pos2cell19age1	200910_Run25_Fob1Mlp1-2_Fl_1_MMStack_Pos2cell21age1	200910_Run25_Fob1Mlp1-2_Fl_1_MMStack_Pos3cell1age1	200910_Run25_Fob1Mlp1-2_Fl_1_MMStack_Pos3cell3age1	200910_Run25_Fob1Mlp1-2_Fl_1_MMStack_Pos3cell5age1	200910_Run25_Fob1Mlp1-2_Fl_1_MMStack_Pos3cell7age2	200910_Run25_Fob1Mlp1-2_Fl_1_MMStack_Pos3cell10age2	200910_Run25_Fob1Mlp1-2_Fl_1_MMStack_Pos3cell12age1	200910_Run25_Fob1Mlp1-2_Fl_1_MMStack_Pos3cell14age1	200910_Run25_Fob1Mlp1-2_Fl_1_MMStack_Pos3cell16age1	200910_Run25_Fob1Mlp1-2_Fl_1_MMStack_Pos5cell1age1	200910_Run25_Fob1Mlp1-2_Fl_1_MMStack_Pos5cell3age2
						strain	Mlp1-Fob1		Mlp1-Fob1	protein	Mlp1-Fob1	Mlp1-Fob1	Mlp1-Fob1	Mlp1-Fob1	Mlp1-Fob1	Mlp1-Fob1	Mlp1-Fob1	Mlp1-Fob1	Mlp1-Fob1	Mlp1-Fob1	Mlp1-Fob1	Mlp1-Fob1	Mlp1-Fob1	Mlp1-Fob1	Mlp1-Fob1	Mlp1-Fob1	Mlp1-Fob1	Mlp1-Fob1	Mlp1-Fob1	Mlp1-Fob1	Mlp1-Fob1	Mlp1-Fob1	Mlp1-Fob1	Mlp1-Fob1	Mlp1-Fob1	Mlp1-Fob1	Mlp1-Fob1	Mlp1-Fob1	Mlp1-Fob1	Mlp1-Fob1	Mlp1-Fob1
						n	31		x		x	x	x	x	x	x	x	x	x	x	x	x	x	x	x	x	x	x	x	x	x	x	x	x	x	x	x	x	x	x	x
									5	Cell	3	5	7	0	3	5	8	0	2	4	7	1	5	7	9	1	3	5	7	9	1	1	3	5	7	0	2	4	6	5	5
						age	1		1	Age	1	1	1	1	1	0	2	2	1	1	2	0	1	1	1	0	1	1	1	1	1	1	1	1	2	2	1	1	1	1	2
						avg	median		0.692309	correlation	0.976603	0.692309	0.37772	0.673571	-0.0909268	0.832703	0.507301	0.298631	0.626319	0.749233	0.814754	0.636523	0.653256	0.914002	0.788587	0.855694	0.20128	0.127009	0.487137	0.428785	0.655044	0.69073	0.63155	0.704894	0.386315	0.680538	0.399904	0.338078	0.638911	0.842474	0.720037
					correlation	0.588354	0.653256		9689.02	GFP	8093.69	9689.02	11421.9	10663.4	11166.5	11119.4	11780	12886.4	14546.3	12246.5	11475.8	10995.2	10476.4	11506.4	11249	9567.67	11239.2	10340.2	11514.4	10579.5	11166.3	10279.9	10218.7	10458.1	10165.6	11293.8	10619.8	10902.2	10412.4	9866.92	10010.7
									246.969	stdev	3018.59	246.969	813.059	731.195	646.115	672.502	605.759	683.826	909.39	419.248	719.825	555.097	355.336	878.827	855.717	986.412	670.215	733.869	774.321	291.52	615.048	567.92	571.86	722.096	515.339	908.543	445.694	551.994	505.189	609.148	735.134
									7901.64	mCh	6821.17	7901.64	9527.41	9349.55	9521.6	9151.49	9589.59	9370.4	10595.8	9794.61	8523.35	8455.06	8287.78	9414.01	9317.19	8670.37	9538.93	9196.75	10262.7	8646.74	8876.34	8857.94	8958.23	9435.13	8264.84	9241.59	8493.18	9358.1	8603.6	8343.54	8235.03
									439.175	stdev	2607	439.175	503.572	729.803	567.12	606.775	607.705	685.653	801.67	486.241	739.16	636.932	392.621	778.515	700.734	610.535	370.444	657.866	700.087	606.003	582.252	525.226	903.151	741.878	749.534	748.784	357.817	662.529	577.862	551.583	582.173
										File	200910_Run25_Fob1Mlp1-2_Fl_1_MMStack_Pos1cell4age21	200910_Run25_Fob1Mlp1-2_Fl_1_MMStack_Pos1cell6age20	200910_Run25_Fob1Mlp1-2_Fl_1_MMStack_Pos1cell9age23	200910_Run25_Fob1Mlp1-2_Fl_1_MMStack_Pos1cell11age22	200910_Run25_Fob1Mlp1-2_Fl_1_MMStack_Pos1cell14age20	200910_Run25_Fob1Mlp1-2_Fl_1_MMStack_Pos1cell17age22	200910_Run25_Fob1Mlp1-2_Fl_1_MMStack_Pos1cell19age21	200910_Run25_Fob1Mlp1-2_Fl_1_MMStack_Pos1cell21age24	200910_Run25_Fob1Mlp1-2_Fl_1_MMStack_Pos1cell23age23	200910_Run25_Fob1Mlp1-2_Fl_1_MMStack_Pos1cell26age22	200910_Run25_Fob1Mlp1-2_Fl_1_MMStack_Pos1cell28age21	200910_Run25_Fob1Mlp1-2_Fl_1_MMStack_Pos2cell4age22	200910_Run25_Fob1Mlp1-2_Fl_1_MMStack_Pos2cell6age23	200910_Run25_Fob1Mlp1-2_Fl_1_MMStack_Pos2cell8age25	200910_Run25_Fob1Mlp1-2_Fl_1_MMStack_Pos2cell10age22	200910_Run25_Fob1Mlp1-2_Fl_1_MMStack_Pos2cell12age18	200910_Run25_Fob1Mlp1-2_Fl_1_MMStack_Pos2cell14age26	200910_Run25_Fob1Mlp1-2_Fl_1_MMStack_Pos2cell16age22	200910_Run25_Fob1Mlp1-2_Fl_1_MMStack_Pos2cell18age16	200910_Run25_Fob1Mlp1-2_Fl_1_MMStack_Pos2cell20age22	200910_Run25_Fob1Mlp1-2_Fl_1_MMStack_Pos2cell25age20	200910_Run25_Fob1Mlp1-2_Fl_1_MMStack_Pos3cell2age21	200910_Run25_Fob1Mlp1-2_Fl_1_MMStack_Pos3cell4age21	200910_Run25_Fob1Mlp1-2_Fl_1_MMStack_Pos3cell6age21	200910_Run25_Fob1Mlp1-2_Fl_1_MMStack_Pos3cell8age23	200910_Run25_Fob1Mlp1-2_Fl_1_MMStack_Pos3cell11age22	200910_Run25_Fob1Mlp1-2_Fl_1_MMStack_Pos3cell13age12	200910_Run25_Fob1Mlp1-2_Fl_1_MMStack_Pos3cell15age12	200910_Run25_Fob1Mlp1-2_Fl_1_MMStack_Pos3cell18age24	200910_Run25_Fob1Mlp1-2_Fl_1_MMStack_Pos5cell2age21	200910_Run25_Fob1Mlp1-2_Fl_1_MMStack_Pos5cell4age20
						strain	Mlp1-Fob1		Mlp1-Fob1	protein	Mlp1-Fob1	Mlp1-Fob1	Mlp1-Fob1	Mlp1-Fob1	Mlp1-Fob1	Mlp1-Fob1	Mlp1-Fob1	Mlp1-Fob1	Mlp1-Fob1	Mlp1-Fob1	Mlp1-Fob1	Mlp1-Fob1	Mlp1-Fob1	Mlp1-Fob1	Mlp1-Fob1	Mlp1-Fob1	Mlp1-Fob1	Mlp1-Fob1	Mlp1-Fob1	Mlp1-Fob1	Mlp1-Fob1	Mlp1-Fob1	Mlp1-Fob1	Mlp1-Fob1	Mlp1-Fob1	Mlp1-Fob1	Mlp1-Fob1	Mlp1-Fob1	Mlp1-Fob1	Mlp1-Fob1	Mlp1-Fob1
						n	31		x		x	x	x	x	x	x	x	x	x	x	x	x	x	x	x	x	x	x	x	x	x	x	x	x	x	x	x	x	x	x	x
									6	Cell	4	6	9	1	4	7	9	1	3	6	8	4	6	8	0	2	4	6	8	0	5	2	4	6	8	1	3	5	8	5	5
						age	22		20	Age	21	20	23	22	20	22	21	24	23	22	21	22	23	25	22	18	26	22	16	22	20	21	21	21	23	22	12	12	24	21	20
						avg	median		0.780469	correlation	0.128439	0.780469	0.673571	0.0586025	0.508169	0.385592	0.619671	0.764239	0.67466	0.883284	0.867867	0.88196	0.955269	0.178787	0.855694	0.589029	0.0800351	0.249068	0.0443804	0.810527	0.866618	-0.0591623	0.671274	0.363932	0.497383	0.481367	0.770129	0.744989	0.398922	0.87568	0.216104
					correlation	0.542469	0.619671		9991.02	GFP	9449.22	9991.02	10663.4	12470.6	12347.1	11601.2	12674.3	13657.2	14087	11494.7	12749.3	10957.4	11011.6	11173.1	9567.67	11702.6	10813.5	9226.15	10367.8	10802.8	11732.3	10256.5	10093.9	10415.5	9569.93	11537.5	12106	11677.2	10321.5	10440.2	9951.63
									758.173	stdev	546.327	758.173	731.195	1145.24	902.182	1028.23	849.755	837.971	785.324	1006.58	781.59	1128.49	982.047	996.499	986.412	909.633	763.361	754.484	677.246	1163.99	1142.08	870	745.985	809.151	732.185	700.093	1009.36	798.3	397.844	1197.02	780.123
									8489.21	mCh	8401.53	8489.21	9349.55	11293.3	11547.3	10472.9	10360.5	10793.9	10841.6	9645.86	9623.2	9066.77	9076.12	10732.3	8670.37	10789.3	9873.94	8940.08	10144.8	9989.54	9141.24	9948.42	8447.93	9504.41	9410.32	9334.04	11657.3	10794.5	9051.86	9471.21	9016.65
									516.584	stdev	414.299	516.584	729.803	833.298	1092	804.405	1052.5	715.679	710.47	754.771	803.871	685.502	1194.73	611.862	610.535	722.701	696.365	472.484	1471.22	1125.35	766.141	390.703	621.393	640.314	472.725	813.628	1476.39	1102.37	583.565	899.137	520.193
									Nup60_Nup159_young	File	180619_11990_10885_Nup60Nup159_Nup170timer_Fl1_1_MMStack_Pos1cell1age2	180619_11990_10885_Nup60Nup159_Nup170timer_Fl1_1_MMStack_Pos1cell4age3	180619_11990_10885_Nup60Nup159_Nup170timer_Fl1_1_MMStack_Pos1cell5age2	180619_11990_10885_Nup60Nup159_Nup170timer_Fl1_1_MMStack_Pos1cell6age2	180619_11990_10885_Nup60Nup159_Nup170timer_Fl1_1_MMStack_Pos1cell7age2	180619_11990_10885_Nup60Nup159_Nup170timer_Fl1_1_MMStack_Pos2cell1age2	180619_11990_10885_Nup60Nup159_Nup170timer_Fl1_1_MMStack_Pos3cell1age2	180619_11990_10885_Nup60Nup159_Nup170timer_Fl1_1_MMStack_Pos3cell3age2	180619_11990_10885_Nup60Nup159_Nup170timer_Fl1_1_MMStack_Pos3cell5age0	180619_11990_10885_Nup60Nup159_Nup170timer_Fl1_1_MMStack_Pos4cell1age0	180619_11990_10885_Nup60Nup159_Nup170timer_Fl1_1_MMStack_Pos4cell2age3	180619_11990_10885_Nup60Nup159_Nup170timer_Fl1_1_MMStack_Pos4cell3age1	180619_11990_10885_Nup60Nup159_Nup170timer_Fl1_1_MMStack_Pos4cell5age1	180619_11990_10885_Nup60Nup159_Nup170timer_Fl1_1_MMStack_Pos4cell8age2	180619_11990_10885_Nup60Nup159_Nup170timer_Fl1_1_MMStack_Pos5cell2age2	180619_11990_10885_Nup60Nup159_Nup170timer_Fl1_1_MMStack_Pos5cell5age1	180619_11990_10885_Nup60Nup159_Nup170timer_Fl1_1_MMStack_Pos5cell8age3	180619_11990_10885_Nup60Nup159_Nup170timer_Fl1_1_MMStack_Pos5cell11age1	180619_11990_10885_Nup60Nup159_Nup170timer_Fl1_1_MMStack_Pos6cell1age3	180619_11990_10885_Nup60Nup159_Nup170timer_Fl1_1_MMStack_Pos6cell2age2	180619_11990_10885_Nup60Nup159_Nup170timer_Fl1_1_MMStack_Pos6cell5age1	180619_11990_10885_Nup60Nup159_Nup170timer_Fl1_1_MMStack_Pos6cell6age0	180619_11990_10885_Nup60Nup159_Nup170timer_Fl1_1_MMStack_Pos6cell7age0	180619_11990_10885_Nup60Nup159_Nup170timer_Fl1_1_MMStack_Pos7cell1age0	180619_11990_10885_Nup60Nup159_Nup170timer_Fl1_1_MMStack_Pos7cell2age1	180619_11990_10885_Nup60Nup159_Nup170timer_Fl1_1_MMStack_Pos7cell3age2	180619_11990_10885_Nup60Nup159_Nup170timer_Fl1_1_MMStack_Pos7cell4age2	180619_11990_10885_Nup60Nup159_Nup170timer_Fl1_1_MMStack_Pos8cell1age3	180619_11990_10885_Nup60Nup159_Nup170timer_Fl1_1_MMStack_Pos8cell2age0	180619_11990_10885_Nup60Nup159_Nup170timer_Fl1_1_MMStack_Pos9cell1age2	180619_11990_10885_Nup60Nup159_Nup170timer_Fl1_1_MMStack_Pos9cell2age0	180619_11990_10885_Nup60Nup159_Nup170timer_Fl1_1_MMStack_Pos9cell5age0	180619_11990_10885_Nup60Nup159_Nup170timer_Fl1_1_MMStack_Pos9cell6age1
								Nup60	Nup60_Nup159_young	protein	Nup60	Nup60	Nup60	Nup60	Nup60	Nup60	Nup60	Nup60	Nup60	Nup60	Nup60	Nup60	Nup60	Nup60	Nup60	Nup60	Nup60	Nup60	Nup60	Nup60	Nup60	Nup60	Nup60	Nup60	Nup60	Nup60	Nup60	Nup60	Nup60	Nup60	Nup60	Nup60	Nup60
									Nup60_Nup159_young	cluster	0	0	0	0	0	0	0	0	0	0	0	0	0	0	0	0	0	0	0	0	0	0	0	0	0	0	0	0	0	0	0	0	0
							33	33	Nup60_Nup159_young	Cell	1	4	5	6	7	1	1	3	5	1	2	3	5	8	2	5	8	11	1	2	5	6	7	1	2	3	4	1	2	1	2	5	6
							2	2	Nup60_Nup159_young	Age	2	3	2	2	2	2	2	2	0	0	3	1	1	2	2	1	3	1	3	2	1	0	0	0	1	2	2	3	0	2	0	0	1
							0.579407	0.556336	Nup60_Nup159_young	correlation	0.488507	0.735107	0.750121	0.392199	0.0318509	0.387001	0.539593	0.835518	0.433702	0.401912	0.670429	0.192523	0.761717	0.579407	0.445986	0.820383	0.515035	0.402144	0.675727	0.365971	0.927594	0.649927	0.934937	0.268636	0.748859	0.65507	0.274508	0.814186	0.586503	0.695459	0.377377	0.271137	0.730055
								6211.81	Nup60_Nup159_young	GFP	6743.17	6994.3	6646.19	6716.71	7122	5602.88	6024.27	7034.98	6599.7	5164.81	6488.24	6928.85	5273.23	6888.68	6496.04	7028.9	5132.81	6741.95	6332.39	6054.39	5564.22	5413.56	5524.51	5755.99	6154.07	6158.36	7233.68	6303.44	5434.65	5360.23	5713.38	5983.93	6375.3
								810.931	Nup60_Nup159_young	stdev	665.659	1108.31	768.055	688.707	571.836	546.518	949.221	1062.57	626.063	791.426	730.481	671.304	525.635	1096.45	912.662	1267.77	639.465	566.813	608.653	628.681	1106.66	758.154	924.011	833.938	1022.88	789.931	744.212	1110.52	999.71	792.146	603.192	636.423	1012.68
								6543.02	Nup60_Nup159_young	mCh	7001.35	6056.62	7170.91	6933.32	8003.66	5210.07	6196.62	6558.81	6413.75	5353.71	7206.09	7998.88	5973.6	6335.95	6914.97	7172.7	4723.8	6848.45	5748.74	6728.01	6659.76	5911.69	6626.06	7147.42	6585.17	6497.76	7444.04	6699.91	6800.47	5710.54	5904.65	6985.15	6397.09
								719.69	Nup60_Nup159_young	stdev	712.382	588.783	818.318	600.586	770.151	249.122	530.41	811.971	717.501	602.631	648.433	939.749	453.174	454.838	963.142	831.827	457.495	639.843	533.73	774.908	1237.96	600.08	1207.26	850.829	649.189	566.392	703.489	923.6	762.473	823.926	680.8	874.13	770.668
									Nup60_Nup159_aged	File	180619_11990_10885_Nup60Nup159_Nup170timer_Fl1_1_MMStack_Pos2cell1age20	180619_11990_10885_Nup60Nup159_Nup170timer_Fl1_1_MMStack_Pos3cell1age19	180619_11990_10885_Nup60Nup159_Nup170timer_Fl1_1_MMStack_Pos4cell1age22	180619_11990_10885_Nup60Nup159_Nup170timer_Fl1_1_MMStack_Pos4cell2age9	180619_11990_10885_Nup60Nup159_Nup170timer_Fl1_1_MMStack_Pos4cell4age20	180619_11990_10885_Nup60Nup159_Nup170timer_Fl1_1_MMStack_Pos4cell5age22	180619_11990_10885_Nup60Nup159_Nup170timer_Fl1_1_MMStack_Pos6cell2age19	180619_11990_10885_Nup60Nup159_Nup170timer_Fl1_1_MMStack_Pos6cell4age18	180619_11990_10885_Nup60Nup159_Nup170timer_Fl1_1_MMStack_Pos6cell5age20	180619_11990_10885_Nup60Nup159_Nup170timer_Fl1_1_MMStack_Pos6cell6age20	180619_11990_10885_Nup60Nup159_Nup170timer_Fl1_1_MMStack_Pos6cell7age20	180619_11990_10885_Nup60Nup159_Nup170timer_Fl1_1_MMStack_Pos11cell1age18	180619_11990_10885_Nup60Nup159_Nup170timer_Fl1_1_MMStack_Pos11cell2age12	180619_11990_10885_Nup60Nup159_Nup170timer_Fl1_1_MMStack_Pos11cell4age22	180619_11990_10885_Nup60Nup159_Nup170timer_Fl1_1_MMStack_Pos11cell8age16	180619_11990_10885_Nup60Nup159_Nup170timer_Fl1_1_MMStack_Pos11cell10age20	180619_11990_10885_Nup60Nup159_Nup170timer_Fl1_1_MMStack_Pos12cell1age21	180619_11990_10885_Nup60Nup159_Nup170timer_Fl1_1_MMStack_Pos12cell2age24	180619_11990_10885_Nup60Nup159_Nup170timer_Fl1_1_MMStack_Pos13cell1age16	180619_11990_10885_Nup60Nup159_Nup170timer_Fl1_1_MMStack_Pos13cell5age24	180619_11990_10885_Nup60Nup159_Nup170timer_Fl1_1_MMStack_Pos13cell4age11	180619_11990_10885_Nup60Nup159_Nup170timer_Fl1_1_MMStack_Pos13cell7age21	180619_11990_10885_Nup60Nup159_Nup170timer_Fl1_1_MMStack_Pos13cell10age17	180619_11990_10885_Nup60Nup159_Nup170timer_Fl1_1_MMStack_Pos13cell13age22	180619_11990_10885_Nup60Nup159_Nup170timer_Fl1_1_MMStack_Pos14cell2age17	180619_11990_10885_Nup60Nup159_Nup170timer_Fl1_1_MMStack_Pos14cell4age22	180619_11990_10885_Nup60Nup159_Nup170timer_Fl1_1_MMStack_Pos15cell2age18	180619_11990_10885_Nup60Nup159_Nup170timer_Fl1_1_MMStack_Pos15cell3age22	180619_11990_10885_Nup60Nup159_Nup170timer_Fl1_1_MMStack_Pos16cell1age20	180619_11990_10885_Nup60Nup159_Nup170timer_Fl1_1_MMStack_Pos16cell2age6	180619_11990_10885_Nup60Nup159_Nup170timer_Fl1_1_MMStack_Pos16cell3age24	180619_11990_10885_Nup60Nup159_Nup170timer_Fl1_1_MMStack_Pos17cell1age4
								Nup60	Nup60_Nup159_aged	protein	Nup60	Nup60	Nup60	Nup60	Nup60	Nup60	Nup60	Nup60	Nup60	Nup60	Nup60	Nup60	Nup60	Nup60	Nup60	Nup60	Nup60	Nup60	Nup60	Nup60	Nup60	Nup60	Nup60	Nup60	Nup60	Nup60	Nup60	Nup60	Nup60	Nup60	Nup60	Nup60
									Nup60_Nup159_aged	cluster	1	1	1	1	1	1	1	1	1	1	1	1	1	1	1	1	1	1	1	1	1	1	1	1	1	1	1	1	1	1	1	0
							32	32	Nup60_Nup159_aged	Cell	1	1	1	2	4	5	2	4	5	6	7	1	2	4	8	10	1	2	1	4	3	7	10	13	2	4	2	3	1	2	3	1
							20	20	Nup60_Nup159_aged	Age	20	19	19	9	20	22	19	18	20	20	20	18	12	22	16	20	21	24	16	24	24	24	17	22	17	22	18	22	20	6	24	4
							0.246763	0.27228	Nup60_Nup159_aged	correlation	0.106996	0.226795	0.164328	0.392363	0.0915711	0.452166	0.331984	0.1551	0.647793	0.388662	0.829437	-0.0770634	0.250952	0.12534	-0.0517781	0.400829	0.278836	0.734082	0.165094	0.384294	0.242574	0.538314	0.194382	-0.13003	0.262834	0.0264399	0.199654	0.163763	-0.192131	0.593737	0.517753	0.297895
								5529.62	Nup60_Nup159_aged	GFP	5774.55	4848.22	5771.33	4132.01	5047.12	4474.73	6521.03	6943.05	6306.26	5921.47	5279.99	6174.77	5000.98	6329.3	5727.38	6997.2	5300.41	4992.16	5612.67	4878.2	4815.81	4995.89	5841.82	5230.62	6038.19	6767.12	5024.4	5122.83	5519.17	4838.09	4907.21	5813.84
								785.35	Nup60_Nup159_aged	stdev	824.555	622.539	969.467	751.113	457.103	764.933	1017.77	868.177	1227.38	1187.57	818.355	1229.68	584.172	556.282	943.275	1035.32	659.159	1117.47	458.012	672.457	703.041	470.358	798.513	829.247	841.286	701.008	951.58	373.816	658.299	695.542	777.758	565.953
								8526.16	Nup60_Nup159_aged	mCh	10921	8868.05	8439.1	5963.43	9572.39	6922.02	10664.1	10552.9	9458.48	9052.49	6562.57	10908.7	8283.23	9048.66	6970.93	9527.19	7442.21	7247.04	6980.25	7990.54	7277.06	8955.72	11468.4	6884.36	8723.79	11836.4	9124.44	7494.34	10095.4	5988.83	6605.17	7008.07
								1598.04	Nup60_Nup159_aged	stdev	2971.84	4017.24	1256.08	1269.66	1659.55	741.439	1431.52	1136.32	1242.6	1219.97	760.945	2430.75	1728.12	1714.14	1580.17	1504.52	2305.14	1653.89	786.496	3480.94	935.101	1988.82	2385.14	943.757	1037.26	1651.68	1462.61	1113.02	2254.18	950.083	728.535	795.708
							File	190416_Run16_N159_N170_Sgf73D_Fob1D_Br_3_MMStack_Pos2cell2asym_age2					190416_Run16_N159_N170_Sgf73D_Fob1D_Br_3_MMStack_Pos2cell3asym_age2					190416_Run16_N159_N170_Sgf73D_Fob1D_Br_3_MMStack_Pos2cell5asym_age2					190416_Run16_N159_N170_Sgf73D_Fob1D_Br_3_MMStack_Pos2cell7asym_age1					190416_Run16_N159_N170_Sgf73D_Fob1D_Br_3_MMStack_Pos2cell8asym_age3					190416_Run16_N159_N170_Sgf73D_Fob1D_Br_3_MMStack_Pos2cell9asym_age1					190416_Run16_N159_N170_Sgf73D_Fob1D_Br_3_MMStack_Pos2cell10asym_age1					190416_Run16_N159_N170_Sgf73D_Fob1D_Br_3_MMStack_Pos2cell11asym_age2					190416_Run16_N159_N170_Sgf73D_Fob1D_Br_3_MMStack_Pos2cell13asym_age1
							protein	Nup170_Sgf73D					Nup170_Sgf73D					Nup170_Sgf73D					Nup170_Sgf73D					Nup170_Sgf73D					Nup170_Sgf73D					Nup170_Sgf73D					Nup170_Sgf73D					Nup170_Sgf73D
							Cell	2					3					5					7					8					9					0					1					3
							Age	2					2					2					1					3					1					1					2					1
							correlation	0.596499					0.902187					0.842851					0.636118					0.800021					0.718233					0.831529					0.850712					0.775258
							GFP	10402.5					10255.9					9468.14					9081.54					9637.81					11064.5					10475.6					10432.2					11056.4
							stdev	581.876					575.021					624.002					437.168					543.3					509.252					488.374					546.154					525.923
							mCh	11550.7					11037.6					11145.2					10490.5					10684.2					11803.8					11341					10969.7					11479.3
							stdev	1039.4					889.036					1075.17					578.89					1222.55					1063.59					956.462					1378.91					829.509
																		File	191023_Run22_N159_N170_Sgf73D_Fob1D_Fl_1_MMStack_Pos2cell2asym_age2					191023_Run22_N159_N170_Sgf73D_Fob1D_Fl_1_MMStack_Pos2cell4asym_age1					191023_Run22_N159_N170_Sgf73D_Fob1D_Fl_1_MMStack_Pos2cell7asym_age3					191023_Run22_N159_N170_Sgf73D_Fob1D_Fl_1_MMStack_Pos2cell9asym_age2					191023_Run22_N159_N170_Sgf73D_Fob1D_Fl_1_MMStack_Pos2cell11asym_age1					191023_Run22_N159_N170_Sgf73D_Fob1D_Fl_1_MMStack_Pos2cell13asym_age0					191023_Run22_N159_N170_Sgf73D_Fob1D_Fl_1_MMStack_Pos2cell15asym_age2
																		protein	Nup170_Fob1D					Nup170_Fob1D					Nup170_Fob1D					Nup170_Fob1D					Nup170_Fob1D					Nup170_Fob1D					Nup170_Fob1D
																		Cell	2					4					7					9					1					3					5
																		Age	2					1					3					2					1					0					2
																		correlation	0.452924					0.803206					0.534241					0.571793					0.838396					0.675115					0.402844
																		GFP	8918.94					9877.07					11075.6					9935.8					8901.57					10113.3					8875.64
																		stdev	309.322					276.222					360.491					243.443					264.1					235.326					181.397
																		mCh	9863.1					10553					11388.8					10031.3					9921.76					10569.2					9644.86
																		stdev	833.669					883.936					790.957					530.035					855.608					681.229					656.397
																		File	191023_Run22_N159_N170_Sgf73D_Fob1D_Fl_1_MMStack_Pos2cell2asym_age2	191023_Run22_N159_N170_Sgf73D_Fob1D_Fl_1_MMStack_Pos2cell4asym_age1	191023_Run22_N159_N170_Sgf73D_Fob1D_Fl_1_MMStack_Pos2cell7asym_age3	191023_Run22_N159_N170_Sgf73D_Fob1D_Fl_1_MMStack_Pos2cell9asym_age2	191023_Run22_N159_N170_Sgf73D_Fob1D_Fl_1_MMStack_Pos2cell11asym_age1	191023_Run22_N159_N170_Sgf73D_Fob1D_Fl_1_MMStack_Pos2cell13asym_age0	191023_Run22_N159_N170_Sgf73D_Fob1D_Fl_1_MMStack_Pos2cell15asym_age2	191023_Run22_N159_N170_Sgf73D_Fob1D_Fl_1_MMStack_Pos2cell17asym_age2	191023_Run22_N159_N170_Sgf73D_Fob1D_Br_1_MMStack_Pos3cell2asym_age1	191023_Run22_N159_N170_Sgf73D_Fob1D_Br_1_MMStack_Pos3cell5asym_age2	191023_Run22_N159_N170_Sgf73D_Fob1D_Br_1_MMStack_Pos3cell7asym_age2	191023_Run22_N159_N170_Sgf73D_Fob1D_Br_1_MMStack_Pos3cell9asym_age2	191023_Run22_N159_N170_Sgf73D_Fob1D_Br_1_MMStack_Pos3cell11asym_age1	191023_Run22_N159_N170_Sgf73D_Fob1D_Br_1_MMStack_Pos3cell13asym_age3	191023_Run22_N159_N170_Sgf73D_Fob1D_Br_1_MMStack_Pos3cell15asym_age2	191023_Run22_N159_N170_Sgf73D_Fob1D_Br_1_MMStack_Pos4cell2asym_age0	191023_Run22_N159_N170_Sgf73D_Fob1D_Br_1_MMStack_Pos4cell4asym_age1	191023_Run22_N159_N170_Sgf73D_Fob1D_Br_1_MMStack_Pos4cell6asym_age1	191023_Run22_N159_N170_Sgf73D_Fob1D_Br_1_MMStack_Pos4cell8asym_age0	191023_Run22_N159_N170_Sgf73D_Fob1D_Br_1_MMStack_Pos4cell11asym_age1	191023_Run22_N159_N170_Sgf73D_Fob1D_Br_1_MMStack_Pos4cell14asym_age1	191023_Run22_N159_N170_Sgf73D_Fob1D_Br_1_MMStack_Pos5cell2asym_age1	191023_Run22_N159_N170_Sgf73D_Fob1D_Br_1_MMStack_Pos5cell4asym_age1	191023_Run22_N159_N170_Sgf73D_Fob1D_Br_1_MMStack_Pos5cell6asym_age2	191023_Run22_N159_N170_Sgf73D_Fob1D_Br_1_MMStack_Pos5cell8asym_age2	191023_Run22_N159_N170_Sgf73D_Fob1D_Br_1_MMStack_Pos5cell12asym_age2	191023_Run22_N159_N170_Sgf73D_Fob1D_Br_1_MMStack_Pos6cell2asym_age1	191023_Run22_N159_N170_Sgf73D_Fob1D_Br_1_MMStack_Pos6cell4asym_age3	191023_Run22_N159_N170_Sgf73D_Fob1D_Br_1_MMStack_Pos6cell6asym_age2	191023_Run22_N159_N170_Sgf73D_Fob1D_Br_1_MMStack_Pos6cell9asym_age2	191023_Run22_N159_N170_Sgf73D_Fob1D_Br_1_MMStack_Pos6cell11asym_age1
							File	protein		Cell	Age	correlation	GFP	stdev	mCh	stdev		protein	Nup170_Fob1D	Nup170_Fob1D	Nup170_Fob1D	Nup170_Fob1D	Nup170_Fob1D	Nup170_Fob1D	Nup170_Fob1D	Nup170_Fob1D	Nup170_Fob1D	Nup170_Fob1D	Nup170_Fob1D	Nup170_Fob1D	Nup170_Fob1D	Nup170_Fob1D	Nup170_Fob1D	Nup170_Fob1D	Nup170_Fob1D	Nup170_Fob1D	Nup170_Fob1D	Nup170_Fob1D	Nup170_Fob1D	Nup170_Fob1D	Nup170_Fob1D	Nup170_Fob1D	Nup170_Fob1D	Nup170_Fob1D	Nup170_Fob1D	Nup170_Fob1D	Nup170_Fob1D	Nup170_Fob1D	Nup170_Fob1D
							191023_Run22_N159_N170_Sgf73D_Fob1D_Fl_1_MMStack_Pos2cell2asym_age2	Nup170_Fob1D		2	2	0.452924	8918.94	309.322	9863.1	833.669
							191023_Run22_N159_N170_Sgf73D_Fob1D_Fl_1_MMStack_Pos2cell4asym_age1	Nup170_Fob1D		4	1	0.803206	9877.07	276.222	10553	883.936		Cell	2	4	7	9	1	3	5	7	2	5	7	9	1	3	5	2	4	6	8	1	4	2	4	6	8	2	2	4	6	9	1
							191023_Run22_N159_N170_Sgf73D_Fob1D_Fl_1_MMStack_Pos2cell7asym_age3	Nup170_Fob1D		7	3	0.534241	11075.6	360.491	11388.8	790.957		Age	2	1	3	2	1	0	2	2	1	2	2	2	1	3	2	0	1	1	0	1	1	1	1	2	2	2	1	3	2	2	1
							191023_Run22_N159_N170_Sgf73D_Fob1D_Fl_1_MMStack_Pos2cell9asym_age2	Nup170_Fob1D		9	2	0.571793	9935.8	243.443	10031.3	530.035		correlation	0.452924	0.803206	0.534241	0.571793	0.838396	0.675115	0.402844	0.671047	0.674178	0.702448	0.545113	0.645061	0.892391	0.935835	0.492154	0.842071	0.870783	0.577744	0.545325	0.796574	0.307096	0.657383	0.834057	0.631437	0.612787	0.575459	0.875716	0.733424	0.865656	0.898874	0.774954
							191023_Run22_N159_N170_Sgf73D_Fob1D_Fl_1_MMStack_Pos2cell11asym_age1	Nup170_Fob1D		1	1	0.838396	8901.57	264.1	9921.76	855.608		GFP	8918.94	9877.07	11075.6	9935.8	8901.57	10113.3	8875.64	9789.24	9701.26	7509.43	7385.76	9723.27	9536.54	9273.45	8893.25	7495.06	8874.56	9163.64	9590.7	9975.82	8104.44	8556.57	8977.09	8924.58	9825.44	8273.93	10032.7	8784.15	10091.9	9866.05	9342.35
							191023_Run22_N159_N170_Sgf73D_Fob1D_Fl_1_MMStack_Pos2cell13asym_age0	Nup170_Fob1D		3	0	0.675115	10113.3	235.326	10569.2	681.229		stdev	309.322	276.222	360.491	243.443	264.1	235.326	181.397	301.5	406.974	289.754	259.477	336.328	385.179	358.399	311.228	288.83	307.182	223.714	283.355	322.873	154.014	261.973	414.487	371.553	225.132	200.076	357.753	300.101	350.698	253.482	372.433
							191023_Run22_N159_N170_Sgf73D_Fob1D_Fl_1_MMStack_Pos2cell15asym_age2	Nup170_Fob1D		5	2	0.402844	8875.64	181.397	9644.86	656.397		mCh	9863.1	10553	11388.8	10031.3	9921.76	10569.2	9644.86	10295.2	10268	9075.89	9040.74	10059.8	9898.61	9657.59	9424.27	8755.93	9307.54	9872.92	10344.5	10378	8051.99	9139.77	10358.3	9537.23	10184.5	8620.56	11279.1	9334.3	9536.46	10006.8	9829.71
							191023_Run22_N159_N170_Sgf73D_Fob1D_Fl_1_MMStack_Pos2cell17asym_age2	Nup170_Fob1D		7	2	0.671047	9789.24	301.5	10295.2	624.737		stdev	833.669	883.936	790.957	530.035	855.608	681.229	656.397	624.737	915.915	1012.91	708.551	805.378	1174.48	961.225	873.902	899.208	782.42	585.9	689.525	1024.6	346.821	936.274	913.653	855.143	583.261	515.206	1310.34	492.519	1009.16	660.634	739.239
							191023_Run22_N159_N170_Sgf73D_Fob1D_Br_1_MMStack_Pos3cell2asym_age1	Nup170_Fob1D		2	1	0.674178	9701.26	406.974	10268	915.915
							191023_Run22_N159_N170_Sgf73D_Fob1D_Br_1_MMStack_Pos3cell5asym_age2	Nup170_Fob1D		5	2	0.702448	7509.43	289.754	9075.89	1012.91
							191023_Run22_N159_N170_Sgf73D_Fob1D_Br_1_MMStack_Pos3cell7asym_age2	Nup170_Fob1D		7	2	0.545113	7385.76	259.477	9040.74	708.551
							191023_Run22_N159_N170_Sgf73D_Fob1D_Br_1_MMStack_Pos3cell9asym_age2	Nup170_Fob1D		9	2	0.645061	9723.27	336.328	10059.8	805.378
							191023_Run22_N159_N170_Sgf73D_Fob1D_Br_1_MMStack_Pos3cell11asym_age1	Nup170_Fob1D		1	1	0.892391	9536.54	385.179	9898.61	1174.48
							191023_Run22_N159_N170_Sgf73D_Fob1D_Br_1_MMStack_Pos3cell13asym_age3	Nup170_Fob1D		3	3	0.935835	9273.45	358.399	9657.59	961.225
							191023_Run22_N159_N170_Sgf73D_Fob1D_Br_1_MMStack_Pos3cell15asym_age2	Nup170_Fob1D		5	2	0.492154	8893.25	311.228	9424.27	873.902
							191023_Run22_N159_N170_Sgf73D_Fob1D_Br_1_MMStack_Pos4cell2asym_age0	Nup170_Fob1D		2	0	0.842071	7495.06	288.83	8755.93	899.208
							191023_Run22_N159_N170_Sgf73D_Fob1D_Br_1_MMStack_Pos4cell4asym_age1	Nup170_Fob1D		4	1	0.870783	8874.56	307.182	9307.54	782.42
							191023_Run22_N159_N170_Sgf73D_Fob1D_Br_1_MMStack_Pos4cell6asym_age1	Nup170_Fob1D		6	1	0.577744	9163.64	223.714	9872.92	585.9
							191023_Run22_N159_N170_Sgf73D_Fob1D_Br_1_MMStack_Pos4cell8asym_age0	Nup170_Fob1D		8	0	0.545325	9590.7	283.355	10344.5	689.525
							191023_Run22_N159_N170_Sgf73D_Fob1D_Br_1_MMStack_Pos4cell11asym_age1	Nup170_Fob1D		1	1	0.796574	9975.82	322.873	10378	1024.6
							191023_Run22_N159_N170_Sgf73D_Fob1D_Br_1_MMStack_Pos4cell14asym_age1	Nup170_Fob1D		4	1	0.307096	8104.44	154.014	8051.99	346.821
							191023_Run22_N159_N170_Sgf73D_Fob1D_Br_1_MMStack_Pos5cell2asym_age1	Nup170_Fob1D		2	1	0.657383	8556.57	261.973	9139.77	936.274
							191023_Run22_N159_N170_Sgf73D_Fob1D_Br_1_MMStack_Pos5cell4asym_age1	Nup170_Fob1D		4	1	0.834057	8977.09	414.487	10358.3	913.653
							191023_Run22_N159_N170_Sgf73D_Fob1D_Br_1_MMStack_Pos5cell6asym_age2	Nup170_Fob1D		6	2	0.631437	8924.58	371.553	9537.23	855.143
							191023_Run22_N159_N170_Sgf73D_Fob1D_Br_1_MMStack_Pos5cell8asym_age2	Nup170_Fob1D		8	2	0.612787	9825.44	225.132	10184.5	583.261
							191023_Run22_N159_N170_Sgf73D_Fob1D_Br_1_MMStack_Pos5cell12asym_age2	Nup170_Fob1D		2	2	0.575459	8273.93	200.076	8620.56	515.206
							191023_Run22_N159_N170_Sgf73D_Fob1D_Br_1_MMStack_Pos6cell2asym_age1	Nup170_Fob1D		2	1	0.875716	10032.7	357.753	11279.1	1310.34
							191023_Run22_N159_N170_Sgf73D_Fob1D_Br_1_MMStack_Pos6cell4asym_age3	Nup170_Fob1D		4	3	0.733424	8784.15	300.101	9334.3	492.519
							191023_Run22_N159_N170_Sgf73D_Fob1D_Br_1_MMStack_Pos6cell6asym_age2	Nup170_Fob1D		6	2	0.865656	10091.9	350.698	9536.46	1009.16
							191023_Run22_N159_N170_Sgf73D_Fob1D_Br_1_MMStack_Pos6cell9asym_age2	Nup170_Fob1D		9	2	0.898874	9866.05	253.482	10006.8	660.634
							191023_Run22_N159_N170_Sgf73D_Fob1D_Br_1_MMStack_Pos6cell11asym_age1	Nup170_Fob1D		1	1	0.774954	9342.35	372.433	9829.71	739.239

## Sheet: Y_N60_N159_Fob1D
	File					File	190306_Run13_RefN159_Nup60_Fob1D_Br_1_MMStack_Pos7cell1asym_age2					190306_Run13_RefN159_Nup60_Fob1D_Br_1_MMStack_Pos7cell2asym_age2					190306_Run13_RefN159_Nup60_Fob1D_Br_1_MMStack_Pos8cell1asym_age3					190306_Run13_RefN159_Nup60_Fob1D_Br_1_MMStack_Pos8cell2asym_age2					190306_Run13_RefN159_Nup60_Fob1D_Br_1_MMStack_Pos8cell3asym_age2					190306_Run13_RefN159_Nup60_Fob1D_Br_1_MMStack_Pos8cell4asym_age2					190306_Run13_RefN159_Nup60_Fob1D_Br_1_MMStack_Pos8cell6asym_age2					190306_Run13_RefN159_Nup60_Fob1D_Br_1_MMStack_Pos8cell7asym_age2					190306_Run13_RefN159_Nup60_Fob1D_Br_1_MMStack_Pos8cell8asym_age2
	protein	Nup60_Fob1D				protein	Nup60-Fob1D					Nup60-Fob1D					Nup60-Fob1D					Nup60-Fob1D					Nup60-Fob1D					Nup60-Fob1D					Nup60-Fob1D					Nup60-Fob1D					Nup60-Fob1D
	Cells	33				Cell	1					2					1					2					3					4					6					7					8
	Age	2				Age	2					2					3					2					2					2					2					2					2
	correlation	0.580398				correlation	0.221972					0.345179					0.772365					0.783517					0.592578					0.912073					0.740784					0.653933					0.624535
	GFP	10442.7				GFP	9940.51					10332.7					10025.5					10916.7					10147					9833.66					10243.8					11102.6					11364.4
	stdev	689.256				stdev	961.112					593.602					750.01					870.462					888.604					858.621					663.286					565.869					704.694
	mCh	9825.49				mCh	9549.25					10541.9					10098.8					9931.98					10455.5					9551.19					10083.3					9785.44					10988.6
	stdev	617.042				stdev	854.255					699.419					733.444					548.323					770.155					772.477					726.331					557.261					485.106
						1	0	11978	9504		1	0	11422	11815		1	0	9654	9038		1	0	11712	10447		1	0	11198	10803		1	0	9443	9798		1	0	10033	10122		1	0	11491	9686		1	0	12826	11260
						2	1	11979	8931		2	1	11013	11413.8		2	1	10284.5	10004.1		2	1	11413.9	10020.7		2	1	11311.7	10889.1		2	1	9907.1	10260.8		2	1	10198.6	10571.4		2	1	11679.8	9936.01		2	1	11870.7	10426
						3	2	10711	8624		3	2	10990.6	10676.7		3	2	10688.8	10528.5		3	2	10781	9980.25		3	2	10859.7	11300.4		3	2	10149.5	9751		3	2	10660.4	10900.1		3	2	11612.8	10181.6		3	2	12131.7	11104.1
						4	3	10185.1	8970.21		4	3	11001.5	10065.8		4	3	10624.3	10750.6		4	3	11058.6	9880.44		4	3	10985.3	11413.7		4	3	9752.55	9693.84		4	3	10411.1	10487.6		4	3	11376.8	10430.1		4	3	12532.4	11973.4
						5	4	9719.35	9129.08		5	4	11062.6	10551.9		5	4	11066.7	11178.5		5	4	11204.7	9625.53		5	4	10802.2	11583.2		5	4	10287.3	10182.6		5	4	10304.9	10005.2		5	4	11411.8	10697		5	4	12456.4	11378.5
						6	5	9377.66	9288.89		6	5	10426.6	10743.4		6	5	12208.4	11179.8		6	5	11165.2	9524.89		6	5	10636.3	11582.3		6	5	10170.1	9810.74		6	5	10374.7	10454.7		6	5	11675	10837.2		6	5	11350.1	10901.9
						7	6	9018.54	9124.85		7	6	10224.3	10366.5		7	6	11536.9	11281.4		7	6	11555.6	9837.25		7	6	10509.8	11063.8		7	6	10249.3	9766.2		7	6	10657.6	10378.8		7	6	11676	10532.1		7	6	10823.4	10948.8
						8	7	9071.69	8906.51		8	7	10527	10515		8	7	11071.3	11104.4		8	7	11763.3	9792.46		8	7	10312.9	10618.2		8	7	10472.1	9890.96		8	7	10730.5	10267.9		8	7	11357.3	10288.7		8	7	10583	10474
						9	8	9172.21	8912.14		9	8	10315	10189.9		9	8	11032.3	10808.4		9	8	12069.4	10394.1		9	8	10097.5	10694.5		9	8	10416.4	9627.34		9	8	10504.2	10012.1		9	8	11231.3	10071		9	8	10420.8	10181.1
						10	9	9447.62	9093.74		10	9	10148.3	10108.5		10	9	10820.8	11164.3		10	9	10131.3	10331.6		10	9	9901.33	10687.4		10	9	10569.8	9934.93		10	9	10563.7	10464.4		10	9	11071.7	9664.32		10	9	10549.2	10098.5
						11	10	9846.11	9433.76		11	10	10195.9	10266		11	10	10418	10478.5		11	10	10177	9932.04		11	10	9999.8	10798.3		11	10	11039.3	10420.3		11	10	10754.5	10759.4		11	10	11448.5	9798.95		11	10	10641.4	10155.9
						12	11	10195.3	9507.2		12	11	10169.3	9913.46		12	11	10156.5	9759.38		12	11	9952.28	9752.77		12	11	10123.9	10717.1		12	11	11197.8	10939.9		12	11	11250.6	10855		12	11	11705.8	9992.9		12	11	10634.2	10398.9
						13	12	9868.45	9466.94		13	12	10221.2	9534.27		13	12	9872.55	9553.81		13	12	10473.5	9617.12		13	12	9277.32	10235.4		13	12	11262.9	10672.1		13	12	11408.4	10836.4		13	12	11785.5	9750.61		13	12	11094.5	11038
						14	13	9786.36	9620.56		14	13	10327.2	9447.9		14	13	9690.01	9416.68		14	13	10478.8	9533.59		14	13	9028.2	9335.62		14	13	11172.3	11037.6		14	13	11452.7	10562.1		14	13	12019.2	9872.74		14	13	11893.9	11251
						15	14	10178.5	9633.42		15	14	10820	9941		15	14	9804.66	9339.85		15	14	9887.78	9253.78		15	14	9238.66	9131.76		15	14	10705.8	10623.2		15	14	11606.6	10478.4		15	14	11992.3	10205.3		15	14	10980	11431.4
						16	15	9173.12	9486.52		16	15	10686.7	10288		16	15	9763.7	9691.11		16	15	9959.46	9735.68		16	15	9233.12	9890.96		16	15	10368	9730.89		16	15	11203.5	10385		16	15	11310	9825.73		16	15	10971.4	11190.5
						17	16	8739.02	9400.88		17	16	10144.1	10478		17	16	10078.2	10097.2		17	16	9757.12	9734.34		17	16	9125.19	10751.6		17	16	10290.8	9157.23		17	16	10118.7	10236.8		17	16	11016.3	9482.79		17	16	11407.8	11117.1
						18	17	8873.49	9289.56		18	17	9308.28	10480.3		18	17	10174.2	10369.7		18	17	9312.87	8801.32		18	17	9044.53	10935.2		18	17	9772.05	9093.56		18	17	10219.7	10749.8		18	17	10995.2	9833.07		18	17	11456.7	11546.1
						19	18	8690.62	9753.05		19	18	9645.76	9736.78		19	18	10031.6	10382.9		19	18	9912.79	9270.22		19	18	9017.08	10315.1		19	18	9378.17	9260.05		19	18	10312.7	11383.2		19	18	10423	10092.1		19	18	10995.6	11095.9
						20	19	9143.16	10303.3		20	19	10025.8	9852.2		20	19	9481.4	9884.6		20	19	10617	9725.4		20	19	9244.96	9765.83		20	19	9244.9	9117.89		20	19	10119.3	10917.9		20	19	10563	9777.66		20	19	11053.4	10570.4
						21	20	9722.98	10644.7		21	20	9481.7	10268.2		21	20	9096.14	9330.73		21	20	10445.3	9660.33		21	20	8963.22	9606.56		21	20	9108.25	8844.95		21	20	9940.2	10218.9		21	20	10573.9	9854.7		21	20	10946.2	10475.5
						22	21	9857.27	10847.3		22	21	9696.15	10725.2		22	21	9217.12	9320.07		22	21	10839.9	9636.47		22	21	9165.48	9052.03		22	21	8923.41	8714.47		22	21	9472.1	9846.14		22	21	10344.4	9803.43		22	21	10822.1	11362.1
						23	22	9280.49	11118.9		23	22	9495.27	10769.1		23	22	9592.04	10077.4		23	22	11547.4	10149.5		23	22	9011.45	9332.23		23	22	8792.58	8902.74		23	22	9208.04	9197.22		23	22	10591	9617.58		23	22	10958.9	10937
						24	23	8941.18	10028.1		24	23	9277.8	11196.8		24	23	9720.54	11056.9		24	23	12688.8	10876.7		24	23	9263	10193.6		24	23	8649.37	9056.94		24	23	9402.97	9217.83		24	23	10406	9321.08		24	23	10534	10893.1
						25	24	9949.78	9768.8		25	24	10088.6	11757.6		25	24	9831.99	11043		25	24	12657.2	11287.6		25	24	9509.1	10137.7		25	24	8571.39	8380.16		25	24	9477.99	8875.84		25	24	10458.5	9181.43		25	24	11210	11295.7
						26	25	11141.4	10139.3		26	25	10315	11639.6		26	25	9479.91	9989.47		26	25	11972.6	11153.8		26	25	10087.8	9950.69		26	25	8716.58	8452.74		26	25	9528.81	8686.1		26	25	10117	8736.52		26	25	12072	11789.3
						27	26	11190.4	10502.8		27	26	10270.1	10946.4		27	26	9307.56	10044.4		27	26	11533.5	10586		27	26	10674.9	10328.9		27	26	8745.7	8437.47		27	26	9398.67	8699.25		27	26	10536	8744.1		27	26	12506.7	11544.6
						28	27	10656.9	10102.1		28	27	11259.6	11203		28	27	9370.21	10186.3		28	27	11613.2	10078.4		28	27	11109.7	11215.2		28	27	8734.45	8361.35		28	27	9496.3	8744.98		28	27	10585.2	8865.23		28	27	12220.8	10995.4
						29	28	10686.9	10246		29	28	11217.5	11643.7		29	28	9353.2	9776.56		29	28	11180.2	10123.1		29	28	11523.5	11190.3		29	28	9084.98	9064.7		29	28	9707.48	9447.14		29	28	10520.5	8697.87		29	28	11624.4	10836.1
						30	29	10713	10780.1		30	29	10854.5	11134.3		30	29	9521.88	9164		30	29	10483	9975.1		30	29	11247.5	11222.2							30	29	9646.94	9551.89
						31	30	11231.3	10553.2		31	30	9682.64	9132.01		31	30	9296.72	9258.04		31	30	10074.5	9173.84		31	30	11028.1	11003.3							31	30	9675.17	9381.41
						32	31	11562.2	8800.11							32	31	9345.87	9000.19							32	31	11387.2	10921.1							32	31	9962.98	9971.51
						33	32	9557.41	7665.75							33	32	9249.9	9001.96							33	32	11481.2	10252.4
						34	33	8331.81	7097.51																	34	33	10597	8569.78

## Sheet: A_N60_N159_Fob1D
	File						File	190306_Run13_RefN159_Nup60_Fob1D_Br_1_MMStack_Pos7cell1asym_age24					190306_Run13_RefN159_Nup60_Fob1D_Br_1_MMStack_Pos7cell2asym_age26					190306_Run13_RefN159_Nup60_Fob1D_Br_1_MMStack_Pos7cell3asym_age25					190306_Run13_RefN159_Nup60_Fob1D_Br_1_MMStack_Pos7cell4asym_age24					190306_Run13_RefN159_Nup60_Fob1D_Br_1_MMStack_Pos7cell5asym_age24					190306_Run13_RefN159_Nup60_Fob1D_Br_1_MMStack_Pos7cell6asym_age25					190306_Run13_RefN159_Nup60_Fob1D_Br_1_MMStack_Pos7cell7asym_age24					190306_Run13_RefN159_Nup60_Fob1D_Br_1_MMStack_Pos8cell1asym_age24					190306_Run13_RefN159_Nup60_Fob1D_Br_1_MMStack_Pos8cell2asym_age24
	protein	Nup60_Fob1D					protein	Nup60-Fob1D					Nup60-Fob1D					Nup60-Fob1D					Nup60-Fob1D					Nup60-Fob1D					Nup60-Fob1D					Nup60-Fob1D					Nup60-Fob1D					Nup60-Fob1D
	Cells	34					Cell	1					2					3					4					5					6					7					1					2
	Age	24					Age	24					26					25					24					24					25					24					24					24
	correlation	0.51181					correlation	0.715594					0.727922					0.544746					0.473165					0.704042					0.625265					0.129929					-0.100719					0.416394
	GFP	10177.6					GFP	9387.43					9958.64					9069.07					8827.49					10142.9					10893.1					11523.2					8554.37					9942.77
	stdev	647.009					stdev	708.623					884.421					463.826					431.013					568.896					713.773					404.11					460.185					706.003
	mCh	10798.6					mCh	9823.43					11131					9638.06					10209.5					10041.5					11661.4					12413.5					9975.1					11091.7
	stdev	847.868					stdev	656.104					849.152					625.371					773.407					486.422					716.889					515.021					784.999					811.296
							1	0	9407	9843		1	0	11379	11238		1	0	9299	9865		1	0	9360	10788		1	0	10364	11043		1	0	10855	11356		1	0	10941	12574		1	0	8708	10117		1	0	10871
							2	1	8745.43	9655.18		2	1	10873.8	11995		2	1	8895	9862		2	1	9384.06	10665.6		2	1	10596.2	10877.4		2	1	10505.9	12103.2		2	1	11401.4	12674.4		2	1	8534	9860		2	1	10386.1
							3	2	8432.97	9230.31		3	2	10706.7	11879		3	2	8794	9626		3	2	9228.36	10123.6		3	2	10744.7	10314.1		3	2	10300.3	12795.1		3	2	11726.6	12554.9		3	2	8670	9652		3	2	10459
							4	3	8241.66	9512.94		4	3	10606.1	11312.1		4	3	8755.66	10360		4	3	9405.74	10556.6		4	3	10861	9823.26		4	3	9963.4	12396.6		4	3	12062.5	12422.1		4	3	8391.06	9680.1		4	3	11273.4
							5	4	8273.68	9353.76		5	4	10059.6	10869.6		5	4	9007.81	10037.5		5	4	9311.59	10605.2		5	4	10677.6	10363.7		5	4	10083.1	11741.3		5	4	11819	12274.1		5	4	8306.41	9818.61		5	4	10215.4
							6	5	8506.46	8981.7		6	5	9944.33	10044.4		6	5	9135.94	9554.43		6	5	9278.54	10965.8		6	5	10812.5	10302.8		6	5	10011.8	11106.5		6	5	11666.9	12372.5		6	5	8291.75	10158.6		6	5	10283.4
							7	6	9012.27	8776.54		7	6	9616.95	9783.23		7	6	8911.15	10146.4		7	6	9083.05	12182.8		7	6	10941.8	10144.9		7	6	10184.2	11353.2		7	6	11937.6	12606.7		7	6	8505.33	10358.8		7	6	10057.9
							8	7	9165.01	9104.45		8	7	9166.65	9639.76		8	7	8629.27	9442.79		8	7	8866.16	10681.3		8	7	11137.2	10454.1		8	7	10059.9	11676		8	7	12321.7	12493.7		8	7	8349.61	10603		8	7	9310.73
							9	8	9415.98	9994.85		9	8	9510.2	9710.49		9	8	8633	8910.52		9	8	8638.02	9356.61		9	8	11030.1	10677.2		9	8	10240.1	11039.1		9	8	12494.3	11871.2		9	8	8401.81	10663		9	8	8729.72
							10	9	9607.47	10222.7		10	9	9981.52	10589.4		10	9	8537.13	8716.66		10	9	8490.92	9395.3		10	9	10224.9	9962.16		10	9	10526.2	10848.2		10	9	12369.3	12113.3		10	9	8632.77	10937.6		10	9	8802.52
							11	10	10133.7	10089.2		11	10	9694.69	11564.8		11	10	8761.11	8499.59		11	10	8507.85	9634.02		11	10	10156.3	9860.22		11	10	10593.8	11097		11	10	12047.3	12600.2		11	10	8648.92	11086.8		11	10	8821.06
							12	11	10285	9989.64		12	11	9213.37	11672.9		12	11	9198.22	8549.25		12	11	9107.79	10459		12	11	10205.3	9652.61		12	11	11001.1	11527.3		12	11	11721.3	12684.8		12	11	8241.49	10824		12	11	8842.72
							13	12	9924.27	10632.7		13	12	9244.03	11367.9		13	12	9808.9	9174.59		13	12	9076.14	11263.3		13	12	9964.68	9526.72		13	12	11881.3	12718.3		13	12	11727.3	12804.9		13	12	8164.75	10074.6		13	12	8695.42
							14	13	10081.5	11209		14	13	9245.42	11115.2		14	13	10255	10480.2		14	13	9148.83	11070.6		14	13	10141.2	10123.3		14	13	11804.2	12960.4		14	13	11628.4	12486		14	13	8306.28	9665.68		14	13	9148.13
							15	14	10154.8	10903.2		15	14	8999.41	10796.3		15	14	10232.5	11057.9		15	14	9306.42	11344.1		15	14	10092.1	10315.5		15	14	11640.1	12490.6		15	14	11620.9	12257.9		15	14	8465.44	9911.44		15	14	9432.71
							16	15	10108.9	10557.4		16	15	9167.52	11169.1		16	15	9887.9	10860.3		16	15	8561.38	10715.3		16	15	9703.3	9513.65		16	15	11492.4	12222.7		16	15	11142.8	12826.9		16	15	8330.02	11021.7		16	15	9672.02
							17	16	9867.94	10210.8		17	16	9372.23	11298		17	16	9450.57	10821.2		17	16	8067	10099.2		17	16	9332.45	9319		17	16	11245.9	12111.9		17	16	11611.5	13554.3		17	16	8849.13	10815.4		17	16	8766.28
							18	17	9575.98	9410.09		18	17	9161.51	11169.4		18	17	9495.14	10409		18	17	8454.75	10243		18	17	9374.8	9487.7		18	17	10981.8	11371.2		18	17	11884.5	13864.4		18	17	9552.45	10355.6		18	17	9376.11
							19	18	9471.62	9374.81		19	18	8934.74	10325.4		19	18	9582.66	9939.38		19	18	8259.21	10246.5		19	18	8863.1	9028.65		19	18	10916.6	11103.2		19	18	11666.4	13314.5		19	18	9106.95	10353.1		19	18	10478
							20	19	9680.96	9508.57		20	19	8805.01	10666.5		20	19	9386.64	9877.6		20	19	8067.66	10545.4		20	19	9360.41	9857.33		20	19	10743.2	11265.8		20	19	11163.2	12770.8		20	19	9081.55	10642.6		20	19	10582.6
							21	20	10156.1	9662.47		21	20	8711.2	10516.8		21	20	9166.66	9513.7		21	20	8147.27	9744.98		21	20	9363.46	9513.18		21	20	10787.6	10985		21	20	11714.2	12691.7		21	20	8625.05	11338.3		21	20	10714.8
							22	21	10412.4	10164.1		22	21	8615.2	9738.67		22	21	9167.28	9068.35		22	21	8143.43	9378.73		22	21	9513.55	9725.23		22	21	11478.1	11135.6		22	21	11300.1	12190		22	21	8555.35	10979.4		22	21	10912.8
							23	22	10543	10417.1		23	22	8630.72	9657.46		23	22	8637	9257.55		23	22	8457.91	9429.8		23	22	9897.82	10191.7		23	22	11663	11815.8		23	22	10833.2	11768.1		23	22	8083.62	10552.1		23	22	10512.2
							24	23	9991.17	10551.2		24	23	8937.7	10220.9		24	23	8585.68	9926.06		24	23	8663.07	9572.11		24	23	10529.8	10057.3		24	23	11416.9	11698.8		24	23	11117.2	12412.8		24	23	7700.8	9485.24		24	23	10381.1
							25	24	9430.41	10283.8		25	24	9225.31	10556.4		25	24	8368.61	9639.59		25	24	9107.85	9965.64		25	24	10060.7	9869.72		25	24	11997.9	11776.2		25	24	11610.8	12190.6		25	24	7701.04	9309.04		25	24	10135.3
							26	25	9102.67	10447		26	25	9717.78	10796.4		26	25	9010.25	9109.24		26	25	9196.64	10148.4		26	25	9743.85	10077.8		26	25	11946.2	12018.3		26	25	11445	11533		26	25	7692.61	9463.72		26	25	10063.2
							27	26	8905.76	10070.9		27	26	10133.4	11129.1		27	26	8969.79	9412.08		27	26	8743.6	9928.84		27	26	9839.09	9871.79		27	26	12009.1	12451.3		27	26	11017	11943		27	26	8291.31	10096.6		27	26	10093.8
							28	27	8980.71	9612.82		28	27	10382.4	11253.9		28	27	8802.64	9360.03		28	27	8736.08	9598.36		28	27	9970.46	9900.61		28	27	11795.5	12576.7		28	27	11066.5	13112.5		28	27	9008.5	9507.31		28	27	10115.5
							29	28	8811.07	9373.73		29	28	10481.1	11321.3		29	28	8567.31	9301.72		29	28	9139.53	10119.9		29	28	10103.3	9766.62		29	28	11835.5	12334.6		29	28	11187.5	12927		29	28	9700.86	9034.55		29	28	10097.8
							30	29	8388.66	9016.08		30	29	10649.1	12558.9		30	29	8620.54	9499.23		30	29	9124.83	9502.93		30	29	10260.1	10789.2		30	29	11475.8	12340.8		30	29	11164	12082.3		30	29	8926.52	8922.59		30	29	10124.3
							31	30	8196.05	8366.34		31	30	11275.2	12957.5		31	30	9036.56	9325.46		31	30	8588.5	8165.05		31	30	10563.4	10876.4		31	30	10845.6	12293.3		31	30	11192.5	11883.8		31	30	8815.18	8972.44		31	30	10225.1
												32	31	11533.7	11943.9		32	31	8970.81	9390.34												32	31	10777.6	11932.3		32	31	11393.3	11995.8		32	31	8698.94	9131.78		32	31	10451.1
												33	32	10965.8	11675.8		33	32	8906.14	9694.32												33	32	10891.1	11536.3		33	32	11508.6	11668.3		33	32	8833.56	9426.91		33	32	10422.6
												34	33	10939.2	11865.5		34	33	8810.37	9712.25												34	33	10565.7	11444.2		34	33	11398.2	11681.9		34	33	9126.35	8775.02		34	33	10122.1
												35	34	10971.6	12327		35	34	9141.1	8931.8												35	34	9900.91	10699.9		35	34	11194.6	12056.5		35	34	8748.06	7770.99		35	34	9421.28
												36	35	10901.2	12499.3																	36	35	9970.08	10252.5		36	35	11061.3	12173.4		36	35	7911.68	9737.68
												37	36	10976.4	11884.3																	37	36	9865.7	10290		37	36	11301.3	12374.2
												38	37	10895.7	11700.3																	38	37	9684.85	10267.6		38	37	11421.1	11905.1
												39	38	10761.5	11299.3
[truncated: 101 more columns]

## Sheet: Y_Mlp1_N159_Fob1D
	File						200910_Run25_Fob1Mlp1-2_Fl_1_MMStack_Pos1cell3age1					200910_Run25_Fob1Mlp1-2_Fl_1_MMStack_Pos1cell5age1					200910_Run25_Fob1Mlp1-2_Fl_1_MMStack_Pos1cell7age1					200910_Run25_Fob1Mlp1-2_Fl_1_MMStack_Pos1cell10age1					200910_Run25_Fob1Mlp1-2_Fl_1_MMStack_Pos1cell13age1					200910_Run25_Fob1Mlp1-2_Fl_1_MMStack_Pos1cell15age0					200910_Run25_Fob1Mlp1-2_Fl_1_MMStack_Pos1cell18age2					200910_Run25_Fob1Mlp1-2_Fl_1_MMStack_Pos1cell20age2					200910_Run25_Fob1Mlp1-2_Fl_1_MMStack_Pos1cell22age1
	protein	Mlp1_Fob1D
	Cells	31					3					5					7					0					3					5					8					0					2
	Age	1					1					1					1					1					1					0					2					2					1
	correlation	0.588354					0.976603					0.692309					0.37772					0.673571					-0.0909268					0.832703					0.507301					0.298631					0.626319
	GFP	10901.7					8093.69					9689.02					11421.9					10663.4					11166.5					11119.4					11780					12886.4					14546.3
	stdev	719.863					3018.59					246.969					813.059					731.195					646.115					672.502					605.759					683.826					909.39
	mCh	8987.22					6821.17					7901.64					9527.41					9349.55					9521.6					9151.49					9589.59					9370.4					10595.8
	stdev	684.207					2607					439.175					503.572					729.803					567.12					606.775					607.705					685.653					801.67
	ttest	0.179153				1	0	10326	8287		1	0	9554	7268		1	0	10526	9376		1	0	12491	10005		1	0	10321	9061		1	0	12052	9436		1	0	10899	9410		1	0	12245	9651		1	0	13126	8118
						2	2.328e-06	9499.99	8364.18		2	2.328e-06	9819	7762		2	2.328e-06	11928	10019.4		2	2.328e-06	11738	9905		2	2.328e-06	10878.1	10351.1		2	2.328e-06	11868.3	9869.86		2	2.328e-06	11120.7	9329.68		2	2.328e-06	12917.5	9404.68		2	2.328e-06	13429	9317
						3	4.657e-06	9130.3	8541.8		3	4.657e-06	9556	7662		3	4.657e-06	12483.5	10052.2		3	4.657e-06	10706	10177		3	4.657e-06	10730.1	10305.6		3	4.657e-06	11235.3	9967.46		3	4.657e-06	11382	10027.6		3	4.657e-06	12743.5	9419.09		3	4.657e-06	13993	10515
						4	6.985e-06	9069.14	8597.2		4	6.985e-06	9636	7617		4	6.985e-06	13424.7	9828.22		4	6.985e-06	11089	10291		4	6.985e-06	10544.2	9755.6		4	6.985e-06	10716.3	9012.25		4	6.985e-06	11891.6	10240		4	6.985e-06	12852.9	9641.49		4	6.985e-06	14858	10213
						5	9.313e-06	9296.53	8265.49		5	9.313e-06	9653.13	8106.5		5	9.313e-06	12803.3	9822.96		5	9.313e-06	10801	10267		5	9.313e-06	10554.3	9535.36		5	9.313e-06	10434.5	8614.88		5	9.313e-06	12459.9	10124		5	9.313e-06	13230.6	9483.78		5	9.313e-06	15367	11051
						6	1.164e-05	9594.86	7910.91		6	1.164e-05	9820.13	8446.38		6	1.164e-05	11581	10280.4		6	1.164e-05	10981.4	9886.21		6	1.164e-05	10744	10137		6	1.164e-05	10381.9	8640.17		6	1.164e-05	11960	8850		6	1.164e-05	13325.2	9250.1		6	1.164e-05	15148.1	11327.9
						7	1.397e-05	9075.06	7468.01		7	1.397e-05	9662.67	8307.75		7	1.397e-05	11280.6	10585.3		7	1.397e-05	10516.1	9897.35		7	1.397e-05	11217.8	9850.03		7	1.397e-05	10498.7	8675.84		7	1.397e-05	11853	9454		7	1.397e-05	14142.6	9547.55		7	1.397e-05	15534.4	11240.1
						8	1.63e-05	8937.7	7541.99		8	1.63e-05	9667.18	7993.07		8	1.63e-05	11245.4	10113.3		8	1.63e-05	9990.12	9702.38		8	1.63e-05	11283.7	9545.92		8	1.63e-05	10818.3	8837.08		8	1.63e-05	12599	9317		8	1.63e-05	14261.8	9473.5		8	1.63e-05	15030.6	10300.3
						9	1.863e-05	8881.63	7562.08		9	1.863e-05	9468.62	7337.04		9	1.863e-05	10810.1	9381.21		9	1.863e-05	9626.22	9430.18		9	1.863e-05	11256.8	9258.13		9	1.863e-05	11012.4	9615.86		9	1.863e-05	12838.5	9238.83		9	1.863e-05	14195.7	9369.11		9	1.863e-05	14109.5	9863.76
						10	2.095e-05	8873.49	6884.51		10	2.095e-05	9438.2	7717		10	2.095e-05	10499	8893.53		10	2.095e-05	9507.79	8524.84		10	2.095e-05	11613.6	9280.04		10	2.095e-05	10742.8	9730.87		10	2.095e-05	12138.1	9432.86		10	2.095e-05	14253.9	9433.42		10	2.095e-05	13291.9	9606.64
						11	2.328e-05	8971.64	6351.8		11	2.328e-05	9440.01	7636.63		11	2.328e-05	10643.2	8919.59		11	2.328e-05	9721.25	8138.77		11	2.328e-05	11565.6	9097.07		11	2.328e-05	11289.7	9424.17		11	2.328e-05	11740.5	9537.35		11	2.328e-05	13834.2	9389.5		11	2.328e-05	13187.5	9709.99
						12	2.561e-05	8937.6	6392.44		12	2.561e-05	9416.76	7701.38		12	2.561e-05	10830.1	9193.07		12	2.561e-05	9591.43	7869.04		12	2.561e-05	11588.8	9137.94		12	2.561e-05	11944.8	9984.28		12	2.561e-05	11558.1	9374.13		12	2.561e-05	13085.9	8861.84		12	2.561e-05	13545.1	10092.5
						13	2.794e-05	9132.48	6790.09		13	2.794e-05	9211.76	7920.76		13	2.794e-05	10934.6	9276.91		13	2.794e-05	9512.02	8066.19		13	2.794e-05	12193.9	9498.65		13	2.794e-05	12064.9	9927.2		13	2.794e-05	11554.2	9523.63		13	2.794e-05	12972.1	9178.29		13	2.794e-05	13615.5	10206.5
						14	3.027e-05	9176.99	6878.23		14	3.027e-05	9561.94	8011.53		14	3.027e-05	11340.6	9080.18		14	3.027e-05	9763	8174		14	3.027e-05	12162.5	8981.79		14	3.027e-05	12365	9929.59		14	3.027e-05	11915.9	9606.55		14	3.027e-05	12729.7	9486.25		14	3.027e-05	13687.6	10367
						15	3.26e-05	9091.05	6697.15		15	3.26e-05	9773.26	7713.3		15	3.26e-05	11770	9223.19		15	3.26e-05	9796.39	8512.1		15	3.26e-05	12475.8	9041.77		15	3.26e-05	12310.7	9936.2		15	3.26e-05	12442.2	9729.5		15	3.26e-05	12334.2	9882.52		15	3.26e-05	14375.6	10525.5
						16	3.492e-05	8923.55	7223.52		16	3.492e-05	9863.27	7446.16		16	3.492e-05	11793.3	9642.14		16	3.492e-05	9807.72	8605		16	3.492e-05	12073.8	9137.98		16	3.492e-05	10719.2	8906.47		16	3.492e-05	12818.5	9999.83		16	3.492e-05	12834.2	11262.3		16	3.492e-05	14931.3	10385.2
						17	3.725e-05	9176.84	7483.22		17	3.725e-05	9771.52	7701.69		17	3.725e-05	11501.5	9293.16		17	3.725e-05	9939.94	9098.13		17	3.725e-05	12428.5	9527.82		17	3.725e-05	10336.3	8656.69		17	3.725e-05	12704.9	10199.4		17	3.725e-05	12926.1	10912.9		17	3.725e-05	15121	10487
						18	3.958e-05	8826.9	7559.8		18	3.958e-05	9662.54	8047.45		18	3.958e-05	11535	9594.29		18	3.958e-05	10487.4	9277.32		18	3.958e-05	12544.8	9912.08		18	3.958e-05	10362.1	8331.64		18	3.958e-05	12316.4	11056		18	3.958e-05	12894.4	10279.7		18	3.958e-05	15201.1	10455.6
						19	4.191e-05	8913.4	7599.74		19	4.191e-05	9601.67	7934.94		19	4.191e-05	11209.2	10385.3		19	4.191e-05	11132.8	8971.13		19	4.191e-05	11221.3	9819.48		19	4.191e-05	10058.9	8041.8		19	4.191e-05	11908.2	10591.3		19	4.191e-05	12585.7	9781.96		19	4.191e-05	15333.3	10664.2
						20	4.424e-05	9115.86	8069.84		20	4.424e-05	9762.96	8073.22		20	4.424e-05	10542.8	10141.2		20	4.424e-05	10845.4	8781.33		20	4.424e-05	10815.6	9653.92		20	4.424e-05	10238.6	7877.96		20	4.424e-05	12034.3	10038.9		20	4.424e-05	12498.3	9080.34		20	4.424e-05	14921.8	11195.5
						21	4.657e-05	8978.04	7810.25		21	4.657e-05	9939.64	8627.76		21	4.657e-05	10615.2	9196.28		21	4.657e-05	11056.8	9074.62		21	4.657e-05	10679.5	9178.06		21	4.657e-05	10558.9	8112.4		21	4.657e-05	11588.1	8988.92		21	4.657e-05	12419.7	8245.67		21	4.657e-05	14386.9	11839.9
						22	4.889e-05	8765.95	7824.41		22	4.889e-05	10217.9	9026.79		22	4.889e-05	10485.8	8729.35		22	4.889e-05	10815.1	8745.05		22	4.889e-05	10648	8320.06		22	4.889e-05	10417.9	8577.56		22	4.889e-05	11144	8577.33		22	4.889e-05	12025.7	8188.07		22	4.889e-05	14040.4	11914.8
						23	5.122e-05	9035.43	7862.83		23	5.122e-05	10258.1	8789.51		23	5.122e-05	10594.4	8918.46		23	5.122e-05	10781.2	9020.29		23	5.122e-05	10772.7	8041.86		23	5.122e-05	10589.3	8561.8		23	5.122e-05	11120.5	8433.18		23	5.122e-05	11961.6	8321.31		23	5.122e-05	13772.6	10737.9
						24	5.355e-05	8985.65	7632.61		24	5.355e-05	10124.9	8133.61		24	5.355e-05	10518.6	9020.13		24	5.355e-05	11561.2	9928.2		24	5.355e-05	10984	8706.59		24	5.355e-05	11346.9	8486.41		24	5.355e-05	11163.1	8633.02		24	5.355e-05	11922.9	8430.83		24	5.355e-05	13600.5	10375.2
						25	5.588e-05	9221.61	8027.81		25	5.588e-05	9862.23	8193.63		25	5.588e-05	11690.4	9701.97		25	5.588e-05	11166.4	9729.76		25	5.588e-05	10939.8	9595.65		25	5.588e-05	12289.1	9572.44		25	5.588e-05	11047.5	8947.45		25	5.588e-05	12055.5	8827.9		25	5.588e-05	13930.2	10793.7
						26	5.821e-05	10029.5	8873.02		26	5.821e-05	9853.17	7786.64		26	5.821e-05	12568	9698.98		26	5.821e-05	11463	9605.51		26	5.821e-05	10837.2	10190.4		26	5.821e-05	12176.3	10052.9		26	5.821e-05	10766	9044.39		26	5.821e-05	12757.2	9434.58		26	5.821e-05	15403	11671
						27	6.054e-05	9858.09	8299.61		27	6.054e-05	9558.08	7479.19		27	6.054e-05	12534.6	9254.32		27	6.054e-05	11129.8	9399.8		27	6.054e-05	10704.1	9793.6		27	6.054e-05	11762.3	9741.28		27	6.054e-05	10961.8	9208.08		27	6.054e-05	12671.6	9569.07		27	6.054e-05	16296.5	11105.5
						28	6.286e-05	9164.23	8469		28	6.286e-05	9395.34	7303.22		28	6.286e-05	12123.8	9146.46		28	6.286e-05	10967.5	9246.83		28	6.286e-05	10425.7	9334.26		28	6.286e-05	11622.5	9704.47		28	6.286e-05	11176.4	9451.11		28	6.286e-05	12541.1	9054.44		28	6.286e-05	15959.6	10999.4
						29	6.519e-05	9026.9	8644.8		29	6.519e-05	9431.68	7403.34							29	6.519e-05	10972.8	9456.79		29	6.519e-05	10354.5	9414.9		29	6.519e-05	11399.6	9410.57		29	6.519e-05	11333.1	10184.3		29	6.519e-05	12487.1	8880.6		29	6.519e-05	15580.9	11427.2
						30	6.752e-05	9169.2	8006.55												30	6.752e-05	10655.9	9927.83		30	6.752e-05	10655.9	9927.83		30	6.752e-05	11042.7	9028.58		30	6.752e-05	11833.7	10235.2							30	6.752e-05	15611.4	11368.6
						31	0	0	0												31	6.985e-05	11057.3	10288.4		31	6.985e-05	11057.3	10288.4		31	6.985e-05	11138.6	9043.32		31	6.985e-05	12254.7	10028.9
						32	0	0	0												32	7.218e-05	10876.7	10276.8		32	7.218e-05	10876.7	10276.8		32	7.218e-05	11386.1	9347.47		32	7.218e-05	12435.4	10054.5
						33	0	0	0												33	7.451e-05	11344.1	10256.2		33	7.451e-05	11344.1	10256.2		33	7.451e-05	11483.2	9455.56
						34	0	0	0																						34	7.683e-05	11337.7	9473.56
																															35	7.916e-05	10870.2	8956.12
																															36	8.149e-05	10534.3	8626.19
																															37	8.382e-05	10661.3	9065.85
																															38	8.615e-05	10470	9123.73

## Sheet: A_Mlp1_N159_Fob1D
	File						200910_Run25_Fob1Mlp1-2_Fl_1_MMStack_Pos1cell4age21					200910_Run25_Fob1Mlp1-2_Fl_1_MMStack_Pos1cell6age20					200910_Run25_Fob1Mlp1-2_Fl_1_MMStack_Pos1cell9age23					200910_Run25_Fob1Mlp1-2_Fl_1_MMStack_Pos1cell11age22					200910_Run25_Fob1Mlp1-2_Fl_1_MMStack_Pos1cell14age20					200910_Run25_Fob1Mlp1-2_Fl_1_MMStack_Pos1cell17age22					200910_Run25_Fob1Mlp1-2_Fl_1_MMStack_Pos1cell19age21					200910_Run25_Fob1Mlp1-2_Fl_1_MMStack_Pos1cell21age24					200910_Run25_Fob1Mlp1-2_Fl_1_MMStack_Pos1cell23age23
	protein	Mlp1_Fob1D
	Cells	31					4					6					9					1					4					7					9					1					3
	Age	22					21					20					23					22					20					22					21					24					23
	correlation	0.542469					0.128439					0.780469					0.673571					0.0586025					0.508169					0.385592					0.619671					0.764239					0.67466
	GFP	11126.1					9449.22					9991.02					10663.4					12470.6					12347.1					11601.2					12674.3					13657.2					14087
	stdev	868.286					546.327					758.173					731.195					1145.24					902.182					1028.23					849.755					837.971					785.324
	mCh	9802.58					8401.53					8489.21					9349.55					11293.3					11547.3					10472.9					10360.5					10793.9					10841.6
	stdev	784.032					414.299					516.584					729.803					833.298					1092					804.405					1052.5					715.679					710.47
						1	0	9532	8843		1	0	9903	8289		1	0	12491	10005		1	0	12104	12565		1	0	11541	11224		1	0	11006	10394		1	0	11893	10318		1	0	13679	10934		1	0	13793	11978
						2	2.328e-06	10212.9	9082.54		2	2.328e-06	9333	8300		2	2.328e-06	11738	9905		2	2.328e-06	12738.6	10753.2		2	2.328e-06	12374	11211.4		2	2.328e-06	10951.8	10299.5		2	2.328e-06	12477.9	10306.7		2	2.328e-06	13967	10652		2	2.328e-06	13985	11859.2
						3	4.657e-06	9693.02	8723.51		3	4.657e-06	9349	8416		3	4.657e-06	10706	10177		3	4.657e-06	12189.1	10727.5		3	4.657e-06	12202.7	11484.5		3	4.657e-06	11318.4	10405.6		3	4.657e-06	12995.9	10131.9		3	4.657e-06	14790	11150		3	4.657e-06	15580.7	11653.7
						4	6.985e-06	10027.2	8352.79		4	6.985e-06	9421	8017		4	6.985e-06	11089	10291		4	6.985e-06	12360.8	11067.2		4	6.985e-06	12136.1	10987		4	6.985e-06	11541.3	10427.4		4	6.985e-06	13047.6	10025.8		4	6.985e-06	13754	11471		4	6.985e-06	15348.3	11648.5
						5	9.313e-06	9938.28	7954.28		5	9.313e-06	9360	7795		5	9.313e-06	10801	10267		5	9.313e-06	13330	11327.8		5	9.313e-06	13012.4	10883.5		5	9.313e-06	11768.2	11346.9		5	9.313e-06	13474.8	10008.5		5	9.313e-06	14419.8	12025		5	9.313e-06	14121.1	10768.5
						6	1.164e-05	9425.16	7735.28		6	1.164e-05	10603	8626		6	1.164e-05	10981.4	9886.21		6	1.164e-05	14255.6	12082.7		6	1.164e-05	13623.5	11990.4		6	1.164e-05	12098.4	11629.5		6	1.164e-05	13649.4	10437.2		6	1.164e-05	13825.4	11680		6	1.164e-05	13423.7	10272.6
						7	1.397e-05	9128.66	7796.15		7	1.397e-05	11097	9481		7	1.397e-05	10516.1	9897.35		7	1.397e-05	13046.1	12156.9		7	1.397e-05	13258	13340.3		7	1.397e-05	12406.7	11951.2		7	1.397e-05	13348.9	10705.1		7	1.397e-05	13780.9	10969		7	1.397e-05	13714.1	10413.7
						8	1.63e-05	9507.65	8314.76		8	1.63e-05	10595.5	9169.47		8	1.63e-05	9990.12	9702.38		8	1.63e-05	12697.7	12752.9		8	1.63e-05	13183.9	14073.2		8	1.63e-05	12839	11584.4		8	1.63e-05	13434.8	10813.3		8	1.63e-05	14476.5	10837.2		8	1.63e-05	13858.2	10366.8
						9	1.863e-05	9618.94	8571.76		9	1.863e-05	10806.6	9068.76		9	1.863e-05	9626.22	9430.18		9	1.863e-05	12875.8	12347		9	1.863e-05	13576.6	13767.5		9	1.863e-05	13564.1	10955.6		9	1.863e-05	13667.7	10958.8		9	1.863e-05	14791.6	11446.3		9	1.863e-05	13680.3	10200.5
						10	2.095e-05	9414.01	8229.6		10	2.095e-05	10893	9145.61		10	2.095e-05	9507.79	8524.84		10	2.095e-05	13341.4	11718.6		10	2.095e-05	13295.6	13948.9		10	2.095e-05	13322.7	10264.4		10	2.095e-05	13640.5	11276.1		10	2.095e-05	14382.3	11174.4		10	2.095e-05	13601.3	10380.4
						11	2.328e-05	9572.1	7841.73		11	2.328e-05	11043.2	9005.48		11	2.328e-05	9721.25	8138.77		11	2.328e-05	14122	11448.4		11	2.328e-05	13062.8	13101.8		11	2.328e-05	13619.4	10114.4		11	2.328e-05	13840.2	11025.1		11	2.328e-05	14479.4	11225.7		11	2.328e-05	13921.6	10811.8
						12	2.561e-05	9840.96	7681.44		12	2.561e-05	10951.2	8974.38		12	2.561e-05	9591.43	7869.04		12	2.561e-05	14102.6	11041.6		12	2.561e-05	11602.8	13500.4		12	2.561e-05	13682.2	10638.7		12	2.561e-05	13931.8	10806.9		12	2.561e-05	14618.5	12133.1		12	2.561e-05	14199.3	10974.1
						13	2.794e-05	9982.1	7802.13		13	2.794e-05	10260.1	8496.51		13	2.794e-05	9512.02	8066.19		13	2.794e-05	13498.1	10747.6		13	2.794e-05	11653	12475.4		13	2.794e-05	13591.2	11124.9		13	2.794e-05	13996.2	11043.6		13	2.794e-05	14445.2	11480.4		13	2.794e-05	14014.7	11200
						14	3.027e-05	10171.9	8047.38		14	3.027e-05	10142.7	7991.64		14	3.027e-05	9763	8174		14	3.027e-05	13193.5	10920		14	3.027e-05	11456.3	11619		14	3.027e-05	13434.2	11127.8		14	3.027e-05	14059.4	11530.3		14	3.027e-05	14149.9	10348.1		14	3.027e-05	14753.9	11327
						15	3.26e-05	9877.18	8363.65		15	3.26e-05	10633.4	8113.26		15	3.26e-05	9796.39	8512.1		15	3.26e-05	14141.1	10576.6		15	3.26e-05	11927.2	11544.2		15	3.26e-05	12686.6	10197.2		15	3.26e-05	12945.3	11586.8		15	3.26e-05	13982.5	9942.07		15	3.26e-05	14550.5	10540.7
						16	3.492e-05	8892.36	8700.17		16	3.492e-05	10689	8400.35		16	3.492e-05	9807.72	8605		16	3.492e-05	13690.6	10289.2		16	3.492e-05	11675.8	11011.1		16	3.492e-05	12052.7	9264.23		16	3.492e-05	12692.9	11869.1		16	3.492e-05	12698.8	10069.9		16	3.492e-05	14038.3	10253.7
						17	3.725e-05	8683.39	8045.2		17	3.725e-05	10832.3	8880.85		17	3.725e-05	9939.94	9098.13		17	3.725e-05	11902.8	9307.2		17	3.725e-05	11131.9	10316.7		17	3.725e-05	11418.9	9020.3		17	3.725e-05	12764	12093.5		17	3.725e-05	12656.4	10168.5		17	3.725e-05	14354.4	10141.2
						18	3.958e-05	9260.97	8671.56		18	3.958e-05	10757.1	9217.7		18	3.958e-05	10487.4	9277.32		18	3.958e-05	11163	9493		18	3.958e-05	10806.6	10058.6		18	3.958e-05	10898.8	9634.4		18	3.958e-05	12869.9	12289.7		18	3.958e-05	12408.5	9982.18		18	3.958e-05	14888.9	10341.6
						19	4.191e-05	8934.19	8707.37		19	4.191e-05	10393	9270.5		19	4.191e-05	11132.8	8971.13		19	4.191e-05	11258.4	10051		19	4.191e-05	11525	10767.8		19	4.191e-05	10721.4	10325.8		19	4.191e-05	12412.1	11818		19	4.191e-05	12476.6	9388.12		19	4.191e-05	14435.5	11056.1
						20	4.424e-05	9063.7	8618.31		20	4.424e-05	9579.77	8918.37		20	4.424e-05	10845.4	8781.33		20	4.424e-05	11833	10606.6		20	4.424e-05	12019	11390		20	4.424e-05	10746.9	9440.73		20	4.424e-05	11725	10236.4		20	4.424e-05	12355.8	9941		20	4.424e-05	13894.1	10869.2
						21	4.657e-05	8613.15	8712.33		21	4.657e-05	9296.17	8503.47		21	4.657e-05	11056.8	9074.62		21	4.657e-05	11439.5	10307.5		21	4.657e-05	12486.2	11685		21	4.657e-05	11210.9	9280.97		21	4.657e-05	11631.2	9767.54		21	4.657e-05	12488.1	10084		21	4.657e-05	13133.6	10286.9
						22	4.889e-05	8771.74	8193.17		22	4.889e-05	9178.6	8173.23		22	4.889e-05	10815.1	8745.05		22	4.889e-05	11145.3	10883		22	4.889e-05	13512.9	11782.9		22	4.889e-05	11180.6	9727.44		22	4.889e-05	11715.6	9328.63		22	4.889e-05	12704.4	9898.29		22	4.889e-05	12847	9921.4
						23	5.122e-05	8810.7	8325.01		23	5.122e-05	9098.49	8275.14		23	5.122e-05	10781.2	9020.29		23	5.122e-05	11272.6	11405.6		23	5.122e-05	14129.5	11824.9		23	5.122e-05	10839.1	9833.78		23	5.122e-05	11766.3	9218.16		23	5.122e-05	12397.4	10218		23	5.122e-05	12646.1	9579.18
						24	5.355e-05	8796.43	8325.21		24	5.355e-05	8820.84	8076.28		24	5.355e-05	11561.2	9928.2		24	5.355e-05	11034.2	11630.8		24	5.355e-05	14243	11105.2		24	5.355e-05	10731	9979.17		24	5.355e-05	11723.6	8894.41		24	5.355e-05	12493.3	10502.4		24	5.355e-05	13088.6	9943.77
						25	5.588e-05	8548.17	8312.06		25	5.588e-05	8990.44	7906.84		25	5.588e-05	11166.4	9729.76		25	5.588e-05	11269.6	11140.6		25	5.588e-05	13573.7	11270.5		25	5.588e-05	10812	9834.26		25	5.588e-05	11622.2	8425.54		25	5.588e-05	13649.7	10764.9		25	5.588e-05	13669.7	10335
						26	5.821e-05	9021.81	8670.93		26	5.821e-05	9113.8	7706.52		26	5.821e-05	11463	9605.51		26	5.821e-05	11132.8	11471.2		26	5.821e-05	12950.6	11169.1		26	5.821e-05	10592.4	9627.5		26	5.821e-05	11385.2	8174.18		26	5.821e-05	13872.6	10579.5		26	5.821e-05	13411.6	10528.3
						27	6.054e-05	10153.8	9067.96		27	6.054e-05	8966.21	7617.81		27	6.054e-05	11129.8	9399.8		27	6.054e-05	10830.8	12162.4		27	6.054e-05	12180.6	10639.2		27	6.054e-05	10321	9670.71		27	6.054e-05	12190.8	9091.68		27	6.054e-05	14288.5	10870		27	6.054e-05	14499.4	11866
						28	6.286e-05	10516.8	9133.69		28	6.286e-05	9155.54	7843.56		28	6.286e-05	10967.5	9246.83		28	6.286e-05	10900.6	11663.3		28	6.286e-05	11853.6	10464.2		28	6.286e-05	10301	10452.7		28	6.286e-05	11717.9	8994.08		28	6.286e-05	13778.5	11185.6		28	6.286e-05	14597.6	12254.9
						29	6.519e-05	9796.96	8821.5		29	6.519e-05	9291.3	8215.11		29	6.519e-05	10972.8	9456.79		29	6.519e-05	11121.1	12543.1		29	6.519e-05	11583.8	10344.9		29	6.519e-05	10378.6	11233.6		29	6.519e-05	11658.5	10121.6		29	6.519e-05	14249.4	11903.3		29	6.519e-05	14447.9	11873.4
						30	6.752e-05	9670.43	8401.33		30	6.752e-05	9913.46	8188.45		30	6.752e-05	10655.9	9927.83		30	6.752e-05	11129.7	11521		30	6.752e-05	11412.5	10264.1		30	6.752e-05	10848.9	11373.5		30	6.752e-05	11954.9	10327							30	6.752e-05	16105.1	11712.8
											31	6.985e-05	10497	8571.78		31	6.985e-05	11057.3	10288.4		31	6.985e-05	11794.9	12232.1		31	6.985e-05	11693.4	10619		31	6.985e-05	11310.9	11109.6		31	6.985e-05	12515.6	10226							31	6.985e-05	15296.5	11461.2
											32	7.218e-05	10747.9	8999.52		32	7.218e-05	10876.7	10276.8		32	7.218e-05	12944.2	11570.4		32	7.218e-05	11688.2	11142.1		32	7.218e-05	11371.5	11102.7		32	7.218e-05	12828.1	9687.83							32	7.218e-05	13825	10720.8
																33	7.451e-05	11344.1	10256.2		33	7.451e-05	13164.5	11036.2		33	7.451e-05	12766.8	11398.2		33	7.451e-05	11220.1	10753.4												33	7.451e-05	13145.1	10233.4
																					34	7.683e-05	13295.2	10810.5		34	7.683e-05	12217.1	11847.4		34	7.683e-05	10929.9	10284.9
																					35	7.916e-05	14250.6	11142.2		35	7.916e-05	11838.9	11158.2		35	7.916e-05	10753.1	9564.52
																					36	8.149e-05	14255.3	12259.7		36	8.149e-05	11299.5	10291		36	8.149e-05	10849	9679.26
																					37	8.382e-05	12587.6	12091.7							37	8.382e-05	11042.6	10212.7
																															38	8.615e-05	11399.2	11309
																															39	8.848e-05	11750	11618.1
																															40	9.08e-05	12535.9	12119.8

## Sheet: Y_N170_N159_Fob1D
	File					File	191023_Run22_N159_N170_Sgf73D_Fob1D_Fl_1_MMStack_Pos2cell2asym_age2					191023_Run22_N159_N170_Sgf73D_Fob1D_Fl_1_MMStack_Pos2cell4asym_age1					191023_Run22_N159_N170_Sgf73D_Fob1D_Fl_1_MMStack_Pos2cell7asym_age3					191023_Run22_N159_N170_Sgf73D_Fob1D_Fl_1_MMStack_Pos2cell9asym_age2					191023_Run22_N159_N170_Sgf73D_Fob1D_Fl_1_MMStack_Pos2cell11asym_age1					191023_Run22_N159_N170_Sgf73D_Fob1D_Fl_1_MMStack_Pos2cell13asym_age0					191023_Run22_N159_N170_Sgf73D_Fob1D_Fl_1_MMStack_Pos2cell15asym_age2					191023_Run22_N159_N170_Sgf73D_Fob1D_Fl_1_MMStack_Pos2cell17asym_age2					191023_Run22_N159_N170_Sgf73D_Fob1D_Br_1_MMStack_Pos3cell2asym_age1
	protein	Nup170_Fob1D				protein	Nup170_Fob1D					Nup170_Fob1D					Nup170_Fob1D					Nup170_Fob1D					Nup170_Fob1D					Nup170_Fob1D					Nup170_Fob1D					Nup170_Fob1D					Nup170_Fob1D
	Cells	31				Cell	2					4					7					9					1					3					5					7					2
	Age	2				Age	2					1					3					2					1					0					2					2					1
	correlation	0.685035				correlation	0.452924					0.803206					0.534241					0.571793					0.838396					0.675115					0.402844					0.671047					0.674178
	GFP	9206.1				GFP	8918.94					9877.07					11075.6					9935.8					8901.57					10113.3					8875.64					9789.24					9701.26
	stdev	296.993				stdev	309.322					276.222					360.491					243.443					264.1					235.326					181.397					301.5					406.974
	mCh	9813.86				mCh	9863.1					10553					11388.8					10031.3					9921.76					10569.2					9644.86					10295.2					10268
	stdev	795.252				stdev	833.669					883.936					790.957					530.035					855.608					681.229					656.397					624.737					915.915
						1	0	9146	9739		1	0	9677	9385		1	0	11415	12193		1	0	9800	9756		1	0	8799	10302		1	0	10423	11186		1	0	9094	9371		1	0	10237	11276		1	0	10137	11626
						2	2.328e-06	9096.66	10759.4		2	2.328e-06	10101.2	9971.97		2	2.328e-06	11521.2	12680.7		2	2.328e-06	9938.12	9999.03		2	2.328e-06	9036.28	10362.7		2	2.328e-06	10338.2	10947.9		2	2.328e-06	9065.02	9235.86		2	2.328e-06	10022.9	10733.2		2	2.328e-06	10146	11541
						3	4.657e-06	9350.57	10381.4		3	4.657e-06	9947.09	10305.9		3	4.657e-06	11692.5	12775.4		3	4.657e-06	10179.3	10471.3		3	4.657e-06	8933.94	10085.3		3	4.657e-06	10363.2	11056.6		3	4.657e-06	8839.51	9376.97		3	4.657e-06	9992.75	10461.5		3	4.657e-06	10075.7	11176.4
						4	6.985e-06	9260.88	10419.5		4	6.985e-06	9860.39	10052		4	6.985e-06	11452.5	12187.9		4	6.985e-06	10208.8	10702.4		4	6.985e-06	8688.31	9526.09		4	6.985e-06	10301.5	11010.2		4	6.985e-06	8743.25	9302.48		4	6.985e-06	9949.61	10026.8		4	6.985e-06	9951.16	10796.7
						5	9.313e-06	9116.44	10133.8		5	9.313e-06	9812.86	10198.4		5	9.313e-06	11301.9	12188.4		5	9.313e-06	10172.1	10831.8		5	9.313e-06	8562.75	8476.78		5	9.313e-06	9990.86	10331.9		5	9.313e-06	8612.7	9295.39		5	9.313e-06	9918.7	10124		5	9.313e-06	9789.36	10737.4
						6	1.164e-05	9219.32	10447.6		6	1.164e-05	10045	11120.6		6	1.164e-05	11377.9	11963		6	1.164e-05	10052.1	10272.2		6	1.164e-05	8847.12	9563.42		6	1.164e-05	10162.4	10418.3		6	1.164e-05	8506.35	9189.28		6	1.164e-05	10110	10694.1		6	1.164e-05	9415	10292
						7	1.397e-05	9206.04	10704.5		7	1.397e-05	10142.2	11836.9		7	1.397e-05	11398	11354		7	1.397e-05	10219.9	10187.5		7	1.397e-05	9195.71	10495.3		7	1.397e-05	10194.5	10970.4		7	1.397e-05	8742.26	10162.9		7	1.397e-05	10193.7	10944.6		7	1.397e-05	9438.75	9300.58
						8	1.63e-05	9399.76	10770.2		8	1.63e-05	10121.1	11899.8		8	1.63e-05	11383	11221.4		8	1.63e-05	10262.3	10286.8		8	1.63e-05	9494.01	10905.5		8	1.63e-05	10257.7	10647.4		8	1.63e-05	9009.25	10432.2		8	1.63e-05	9848.74	10432		8	1.63e-05	9589.82	9145.33
						9	1.863e-05	9214.08	10474.6		9	1.863e-05	10163	11878.4		9	1.863e-05	11141.2	10833.6		9	1.863e-05	10081.5	9882.38		9	1.863e-05	9302.05	10658.1		9	1.863e-05	10229.1	10490.8		9	1.863e-05	9226.1	10181		9	1.863e-05	9797.26	10221		9	1.863e-05	9642.66	8992.65
						10	2.095e-05	9192.87	10102.4		10	2.095e-05	10175.2	11777.5		10	2.095e-05	10757.2	10788		10	2.095e-05	9847.36	9482.9		10	2.095e-05	9106.27	10180.7		10	2.095e-05	10359.2	10817.1		10	2.095e-05	9130.42	10647.3		10	2.095e-05	9570.96	10126.7		10	2.095e-05	9651.46	9434.88
						11	2.328e-05	8805.77	9858.56		11	2.328e-05	10178.8	11136.5		11	2.328e-05	10936	10519.8		11	2.328e-05	9708.31	9932.51		11	2.328e-05	8977.4	9943.84		11	2.328e-05	10109	11395.8		11	2.328e-05	8874.81	10806.6		11	2.328e-05	9361.27	10012.5		11	2.328e-05	10051.3	10339.3
						12	2.561e-05	8653.75	9657.74		12	2.561e-05	9887.44	10514.5		12	2.561e-05	11395.5	10989.9		12	2.561e-05	9726.55	10595.1		12	2.561e-05	9144.6	10449.6		12	2.561e-05	10250.2	11817.4		12	2.561e-05	8778.25	10260.9		12	2.561e-05	9931.48	11287.7		12	2.561e-05	9702.35	10624.9
						13	2.794e-05	8818.21	9048.85		13	2.794e-05	9890.08	10241.6		13	2.794e-05	10903.6	10815.5		13	2.794e-05	9685.86	10293.3		13	2.794e-05	9282.08	11634		13	2.794e-05	10348.8	11249.1		13	2.794e-05	9088.84	10105.9		13	2.794e-05	10028.3	11378.9		13	2.794e-05	9304.69	10052.2
						14	3.027e-05	8767.82	8807.12		14	3.027e-05	10022.7	10319.2		14	3.027e-05	10990.2	10231.1		14	3.027e-05	9423.19	9973.99		14	3.027e-05	9205.59	11666.4		14	3.027e-05	10487	11055.5		14	3.027e-05	9041.48	9946.96		14	3.027e-05	9745.33	11063.8		14	3.027e-05	8894.17	8700.37
						15	3.26e-05	8666.34	9127.86		15	3.26e-05	10128	10981.1		15	3.26e-05	10863.6	10231.7		15	3.26e-05	9760.38	9616.61		15	3.26e-05	8925.99	11222.3		15	3.26e-05	9870.89	9771.57		15	3.26e-05	8491.8	8753.12		15	3.26e-05	9396.53	9925.9		15	3.26e-05	9010.55	8740.56
						16	3.492e-05	8742.82	9673.76		16	3.492e-05	10102.4	11239.8		16	3.492e-05	11186.8	10233.1		16	3.492e-05	9814.13	10399.1		16	3.492e-05	8992.43	10632.1		16	3.492e-05	10015.4	9993.76		16	3.492e-05	8527.96	9009.2		16	3.492e-05	9513.49	9976.46		16	3.492e-05	9174.69	9116.12
						17	3.725e-05	8647.52	9279.04		17	3.725e-05	10119.9	11041.2		17	3.725e-05	11069.5	10306.9		17	3.725e-05	10025	10922.8		17	3.725e-05	8841.22	9720.3		17	3.725e-05	9894.84	10626.7		17	3.725e-05	8885.84	9573.58		17	3.725e-05	9555.66	10168.3		17	3.725e-05	9367.72	9496.71
						18	3.958e-05	8382.65	9035.6		18	3.958e-05	10337.2	11587.6		18	3.958e-05	11057.6	10419.3		18	3.958e-05	10256	10494.6		18	3.958e-05	9032.59	9707.35		18	3.958e-05	9998.32	10133.9		18	3.958e-05	8865.49	10121.7		18	3.958e-05	9626.1	10212.7		18	3.958e-05	9380.82	9663.39
						19	4.191e-05	8440.5	9266.5		19	4.191e-05	10185.7	11428.5		19	4.191e-05	11114.4	10767.4		19	4.191e-05	10583.1	10352.7		19	4.191e-05	9054.67	9857.1		19	4.191e-05	9804.84	9684.84		19	4.191e-05	8943.24	10766.2		19	4.191e-05	9576.81	10019.7		19	4.191e-05	9341.64	9539.49
						20	4.424e-05	8444.6	9412.65		20	4.424e-05	10234.4	11270.4		20	4.424e-05	10677.4	10835.9		20	4.424e-05	10119.5	10403.9		20	4.424e-05	8866.69	9914.12		20	4.424e-05	9967.26	9227.61		20	4.424e-05	8956.94	10991.1		20	4.424e-05	9174.94	9230.18		20	4.424e-05	9145.44	10039.2
						21	4.657e-05	8338.65	9761.8		21	4.657e-05	10161.1	11327		21	4.657e-05	10515	11750.4		21	4.657e-05	9848.47	10257.3		21	4.657e-05	8898.52	9734.92		21	4.657e-05	10015.2	8979.54		21	4.657e-05	8881.23	9970.31		21	4.657e-05	9147.84	9872.8		21	4.657e-05	9266.06	10601.9
						22	4.889e-05	8372.2	9842.75		22	4.889e-05	9980.47	11364.9		22	4.889e-05	10797.3	12122.9		22	4.889e-05	10038.8	9851.44		22	4.889e-05	8792.73	9352.06		22	4.889e-05	9591	9217.98		22	4.889e-05	8788.08	9350.34		22	4.889e-05	9519.42	10183.9		22	4.889e-05	9232.69	10977.2
						23	5.122e-05	8547.88	9892.96		23	5.122e-05	9742.84	10923.8		23	5.122e-05	10727.1	12108		23	5.122e-05	9935.18	9454.95		23	5.122e-05	8649.72	9144.84		23	5.122e-05	9602.55	10336.5		23	5.122e-05	8725.42	8810.18		23	5.122e-05	9629.48	10001.7		23	5.122e-05	9279.91	10910.5
						24	5.355e-05	8996.78	10836.7		24	5.355e-05	9551.94	10479.2		24	5.355e-05	10452.3	11295.1		24	5.355e-05	9798.73	9167.5		24	5.355e-05	8548.6	8760.68		24	5.355e-05	9903.85	10949		24	5.355e-05	8958.36	8616.88		24	5.355e-05	10022.2	10499.5		24	5.355e-05	9598.16	10443.9
						25	5.588e-05	8980.7	11667.5		25	5.588e-05	9502.22	10134.9		25	5.588e-05	10061	10022.5		25	5.588e-05	9784.92	9549.5		25	5.588e-05	8608.48	8704.72		25	5.588e-05	9874.81	10370.2		25	5.588e-05	8989.13	8894.96		25	5.588e-05	10098.9	10343.8		25	5.588e-05	10014.1	9955.44
						26	5.821e-05	9234.41	11385.6		26	5.821e-05	9485.22	9902.26		26	5.821e-05	10521.3	10609		26	5.821e-05	9834.86	9818.35		26	5.821e-05	8729.19	8820.36		26	5.821e-05	10163	10883.1		26	5.821e-05	8897.56	8942.18		26	5.821e-05	10045.5	10290.2		26	5.821e-05	10012.7	9572.15
						27	6.054e-05	9224.68	11284.7		27	6.054e-05	9493.1	9627.56		27	6.054e-05	10789.8	11601.2		27	6.054e-05	9804.61	10151.8		27	6.054e-05	8833.97	9721.29		27	6.054e-05	10252.2	11189.6		27	6.054e-05	8730.13	8882.99		27	6.054e-05	10034.6	10361.1		27	6.054e-05	10062.9	9573.83
						28	6.286e-05	8862.09	10669.2		28	6.286e-05	9518.58	9673.49		28	6.286e-05	11009	11797.9		28	6.286e-05	9861.24	9856.16		28	6.286e-05	8934.92	10312.9		28	6.286e-05	10391.1	11110		28	6.286e-05	8833.64	9573.9		28	6.286e-05	10226.3	11210.3		28	6.286e-05	10031	10200.8
						29	6.519e-05	8847.88	10001.9		29	6.519e-05	9683.78	10276.7		29	6.519e-05	11315.3	11909		29	6.519e-05	9994.67	10113.6		29	6.519e-05	8927.91	10189.3		29	6.519e-05	10261.1	10865.9		29	6.519e-05	8870.77	9917.8		29	6.519e-05	9911.27	10242		29	6.519e-05	10161.1	11122.7
						30	6.752e-05	8965.02	9266.6		30	6.752e-05	9712.04	10799.3		30	6.752e-05	11239.7	11811.3		30	6.752e-05	10111.3	10447.4		30	6.752e-05	8445.33	9409.91		30	6.752e-05	9977.27	10342		30	6.752e-05	8900.92	9460.77		30	6.752e-05	9776.79	9420.65		30	6.752e-05	10072.8	11255.3
						31	6.985e-05	8765.79	8481.1		31	6.985e-05	9665.4	9910.35		31	6.985e-05	11218.7	11506.2		31	6.985e-05	9909.5	10051.2		31	6.985e-05	8290.55	8120.69							31	6.985e-05	9100.6	9374.4		31	6.985e-05	9502.69	8408.18		31	6.985e-05	9990.56	11088.2
						32	7.218e-05	8913.35	9095.93		32	7.218e-05	9458.06	10149.4		32	7.218e-05	11281.8	11988.1		32	7.218e-05	9547	8987												32	7.218e-05	8921.11	9311.16							32	7.218e-05	10279.8	11873.4
						33	7.451e-05	9092.92	9731.07		33	7.451e-05	9674.79	9392.67		33	7.451e-05	11209	12009.2		33	7.451e-05	9548.5	8468																						33	7.451e-05	10418.8	11802.1
						34	7.683e-05	9378.7	9088.1		34	7.683e-05	9483.95	9023.65		34	7.683e-05	11497.7	12375.3																											34	7.683e-05	10328.7	11323.1
						35	7.916e-05	9178.84	8660.94		35	7.916e-05	9452.3	8182.46		35	7.916e-05	11377.5	12165.3																											35	7.916e-05	10024	10755
						36	8.149e-05	8809.28	8304.59																																					36	8.149e-05	9867.41	10972.7
																																														37	8.382e-05	9404.06	9604.53
																																														38	8.615e-05	9392.71	8794.95

## Sheet: A_N170_N159_Fob1D
	File					File	190426_Run17_N159_N170_Fob1D_Br_1_MMStack_Pos1cell1asym_age13					191023_Run22_N159_N170_Sgf73D_Fob1D_Fl_1_MMStack_Pos2cell3asym_age23					191023_Run22_N159_N170_Sgf73D_Fob1D_Fl_1_MMStack_Pos2cell6asym_age23					191023_Run22_N159_N170_Sgf73D_Fob1D_Fl_1_MMStack_Pos2cell8asym_age22					191023_Run22_N159_N170_Sgf73D_Fob1D_Fl_1_MMStack_Pos2cell10asym_age21					191023_Run22_N159_N170_Sgf73D_Fob1D_Fl_1_MMStack_Pos2cell12asym_age22					191023_Run22_N159_N170_Sgf73D_Fob1D_Fl_1_MMStack_Pos2cell14asym_age23					191023_Run22_N159_N170_Sgf73D_Fob1D_Fl_1_MMStack_Pos2cell16asym_age24					191023_Run22_N159_N170_Sgf73D_Fob1D_Br_1_MMStack_Pos3cell1asym_age24
	protein	Nup170_Fob1D				protein	Nup170-Fob1D					Nup170-Fob1D					Nup170-Fob1D					Nup170-Fob1D					Nup170-Fob1D					Nup170-Fob1D					Nup170-Fob1D					Nup170-Fob1D					Nup170-Fob1D
	Cells	31				Cell	1					3					6					8					0					2					4					6					1
	Age	23				Age	13					23					23					22					21					22					23					24					24
	correlation	0.671302				correlation	0.524395					0.82465					0.729426					0.64986					0.766358					0.610081					0.888555					0.643683					0.341892
	GFP	9455.08				GFP	8685.45					9597.05					10412.2					10069.2					9606.76					10275.7					8909.71					9136.71					9667.36
	stdev	320.412				stdev	335.874					214.689					268.269					273.113					269.694					318.377					404.374					291.225					320.75
	mCh	11200.2				mCh	13285.9					11567.6					11118.5					11850.4					11616.9					10308.8					10065.3					10626.9					10936.5
	stdev	906.462				stdev	1341.49					739.617					575.226					876.965					928.069					537.549					957.804					1030					833.536
						1	0	8963	11652		1	0	9407	11047		1	0	10630	11415		1	0	10229	11889		1	0	9763.71	11857.2		1	0	9941	9891		1	0	9148	10800		1	0	9037	10924		1	0	9086	11584
						2	2.328e-06	8946.57	12218		2	2.328e-06	9626.26	11769		2	2.328e-06	10750.8	11562.6		2	2.328e-06	10280.3	11765.5		2	2.328e-06	9927.31	12745.6		2	2.328e-06	9986.21	9981.87		2	2.328e-06	9015.92	10668.1		2	2.328e-06	8992.03	11286.5		2	2.328e-06	9675	11227
						3	4.657e-06	8782.04	12708.2		3	4.657e-06	9777.49	12390		3	4.657e-06	10762.5	12189.6		3	4.657e-06	10318.7	11920.4		3	4.657e-06	10018.1	13614.9		3	4.657e-06	10252.6	10288.3		3	4.657e-06	8779.49	9997.56		3	4.657e-06	9224.23	11571.3		3	4.657e-06	9797	12174
						4	6.985e-06	8760.25	13002.8		4	6.985e-06	9738.35	12565.7		4	6.985e-06	10260.6	11273.3		4	6.985e-06	10211.9	11637		4	6.985e-06	9852.52	13442.4		4	6.985e-06	10296.6	10365.7		4	6.985e-06	8650.09	9528.86		4	6.985e-06	9558.5	11939.9		4	6.985e-06	10142	12465
						5	9.313e-06	8958.27	13208.5		5	9.313e-06	9865.96	12161.9		5	9.313e-06	10184.7	10871.3		5	9.313e-06	10378.9	11987.3		5	9.313e-06	9864.17	12514.7		5	9.313e-06	10505.3	10248		5	9.313e-06	8528.74	9123.05		5	9.313e-06	9345.67	11366.5		5	9.313e-06	10370	11970
						6	1.164e-05	8974.6	13518.2		6	1.164e-05	9601.6	11293.4		6	1.164e-05	10426.6	11297.6		6	1.164e-05	10214.7	11901.7		6	1.164e-05	9720.44	12425.7		6	1.164e-05	10264.9	10490.5		6	1.164e-05	8297.97	8778.25		6	1.164e-05	9063.8	10540.9		6	1.164e-05	10322	11634
						7	1.397e-05	8875.72	13374.1		7	1.397e-05	9463.35	10853		7	1.397e-05	10522.4	11574.5		7	1.397e-05	9799.32	10524.9		7	1.397e-05	9682.88	12235.5		7	1.397e-05	10232	9793.45		7	1.397e-05	8198.99	8551.86		7	1.397e-05	8920.57	10244.7		7	1.397e-05	9525	11264
						8	1.63e-05	8629.56	12987.5		8	1.63e-05	9448.1	11090.2		8	1.63e-05	10602.2	11367.2		8	1.63e-05	9659.05	10019.7		8	1.63e-05	9514.5	11398.7		8	1.63e-05	10356.2	9705.81		8	1.63e-05	8245.15	8620.47		8	1.63e-05	8551.67	10263.3		8	1.63e-05	9862.67	11157.7
						9	1.863e-05	8494.72	12803.7		9	1.863e-05	9513.98	11285.2		9	1.863e-05	10565.5	10961.5		9	1.863e-05	9909	9887.81		9	1.863e-05	9474.81	11183.5		9	1.863e-05	10434	9839.34		9	1.863e-05	8370.35	9131.17		9	1.863e-05	8787.8	10322.2		9	1.863e-05	9611.08	10975.9
						10	2.095e-05	8556.32	12722		10	2.095e-05	9713.5	11695.6		10	2.095e-05	10303.7	10574.3		10	2.095e-05	9756.19	9928.75		10	2.095e-05	9218.93	10778.6		10	2.095e-05	10258.7	10024.6		10	2.095e-05	8931.23	9704.73		10	2.095e-05	9038.13	11328.8		10	2.095e-05	9658.58	10682.7
						11	2.328e-05	8466.32	12509.9		11	2.328e-05	9651.75	12530.4		11	2.328e-05	10057.7	10216.2		11	2.328e-05	9534.42	9984.58		11	2.328e-05	9129.17	10339		11	2.328e-05	10134.7	9808.64		11	2.328e-05	9041.8	10228.1		11	2.328e-05	9208.8	11893.5		11	2.328e-05	9662.85	10759.6
						12	2.561e-05	8412.5	11865.9		12	2.561e-05	9846.13	11462.6		12	2.561e-05	10203.8	9993.9		12	2.561e-05	9568.17	10233.3		12	2.561e-05	9102.55	10397.5		12	2.561e-05	10413.7	9909.17		12	2.561e-05	9496.9	11036.4		12	2.561e-05	9463.15	12299.1		12	2.561e-05	9553.76	10747.4
						13	2.794e-05	8381.13	11525		13	2.794e-05	9493.94	10942.7		13	2.794e-05	10325.8	10556.5		13	2.794e-05	9923.73	10923.5		13	2.794e-05	9255.97	10927.5		13	2.794e-05	10651.7	10158.3		13	2.794e-05	9589.96	11074.6		13	2.794e-05	9613.75	11681.1		13	2.794e-05	9638.1	10898.5
						14	3.027e-05	8507.29	11864.9		14	3.027e-05	9286.28	10728.4		14	3.027e-05	10602	11517.6		14	3.027e-05	10330.8	11630.7		14	3.027e-05	9121.97	10958.7		14	3.027e-05	10533	10608		14	3.027e-05	9464.33	11140.8		14	3.027e-05	9146.74	10417.1		14	3.027e-05	9730.38	10749.5
						15	3.26e-05	8837	12260		15	3.26e-05	9382.68	11461.9		15	3.26e-05	10727.4	11624.2		15	3.26e-05	10552.6	13085.2		15	3.26e-05	9217.56	10905.7		15	3.26e-05	10348.4	10716		15	3.26e-05	9395.84	11462.4		15	3.26e-05	8859.04	9459.31		15	3.26e-05	9700.75	10212.2
						16	3.492e-05	9263.32	12999.9		16	3.492e-05	9528.6	11562.4		16	3.492e-05	10292.4	11436.4		16	3.492e-05	10402.3	13369		16	3.492e-05	9344.49	11137.8		16	3.492e-05	10398.8	10813.1		16	3.492e-05	9509.43	11936.7		16	3.492e-05	8784.88	8825.87		16	3.492e-05	9631.44	9659.77
						17	3.725e-05	9207.79	14313.7		17	3.725e-05	9292.34	11637.8		17	3.725e-05	10333.8	11156.9		17	3.725e-05	10350.1	12899.9		17	3.725e-05	9285.79	11418.6		17	3.725e-05	10312.6	10524.7		17	3.725e-05	9056.3	11189.8		17	3.725e-05	8617.43	8411.48		17	3.725e-05	9484.75	9426.69
						18	3.958e-05	9218.81	15865.3		18	3.958e-05	9430.52	11489.5		18	3.958e-05	10031.3	10832.2		18	3.958e-05	10389.5	12902.3		18	3.958e-05	9412.18	12065.9		18	3.958e-05	9988.37	10116.1		18	3.958e-05	8781.64	10623.4		18	3.958e-05	8727.63	8535.39		18	3.958e-05	9329.82	8960.74
						19	4.191e-05	9556.33	16060.4		19	4.191e-05	9396.39	10977.2		19	4.191e-05	10372.9	10504.9		19	4.191e-05	10327.5	12541.3		19	4.191e-05	9700.27	12776.5		19	4.191e-05	10036.2	10702.2		19	4.191e-05	8806.7	10455.2		19	4.191e-05	9038.86	8923.86		19	4.191e-05	9468.67	9279.2
						20	4.424e-05	9013.11	17604.9		20	4.424e-05	9281.38	10693.5		20	4.424e-05	10150.2	10290.3		20	4.424e-05	10264.1	12442.6		20	4.424e-05	9970.32	13230.4		20	4.424e-05	10034.9	10962		20	4.424e-05	8854.73	10064.3		20	4.424e-05	9076.72	9193.48		20	4.424e-05	9374.16	9672.13
						21	4.657e-05	9007.99	16308		21	4.657e-05	9274.93	10900.6		21	4.657e-05	10613.1	10923.9		21	4.657e-05	10112.1	12566.3		21	4.657e-05	9952.75	12530.8		21	4.657e-05	10098.4	10708.8		21	4.657e-05	8423.51	9848.52		21	4.657e-05	9164.2	9552.76		21	4.657e-05	9681.22	9857.03
						22	4.889e-05	9038.29	15177.3		22	4.889e-05	9556.69	11031.4		22	4.889e-05	10764.9	11407.1		22	4.889e-05	10145.3	12590.1		22	4.889e-05	9684.93	11521.9		22	4.889e-05	10335.7	10522.9		22	4.889e-05	8758.28	9706.51		22	4.889e-05	9338.75	10068		22	4.889e-05	9866.77	10309.8
						23	5.122e-05	8853.79	14668.4		23	5.122e-05	9599.89	11190.4		23	5.122e-05	10694.7	11486.7		23	5.122e-05	10213.3	11969.4		23	5.122e-05	9587.33	11001		23	5.122e-05	9903.74	10487.7		23	5.122e-05	8857.56	10304.2		23	5.122e-05	9499.9	10897.5		23	5.122e-05	9763.32	10752.9
						24	5.355e-05	8777.85	14703.4		24	5.355e-05	9819.67	11578.3		24	5.355e-05	10452.2	11385.5		24	5.355e-05	10194.8	11367.4		24	5.355e-05	9604.23	11094		24	5.355e-05	10051.5	10029.8		24	5.355e-05	9192.2	11007.8		24	5.355e-05	9654.02	11200.9		24	5.355e-05	10234.1	11030.1
						25	5.588e-05	8988.66	15252.9		25	5.588e-05	9779.87	11767.6		25	5.588e-05	10598.2	11180.3		25	5.588e-05	9850.88	11268.9		25	5.588e-05	9929	13052.6		25	5.588e-05	10053.6	10034		25	5.588e-05	9422.2	10972.2		25	5.588e-05	9595.26	10950.9		25	5.588e-05	9824.17	11238.5
						26	5.821e-05	8861.5	15405.1		26	5.821e-05	9613.85	11510.7		26	5.821e-05	10649.1	11063.8		26	5.821e-05	9881.84	11987.8		26	5.821e-05	9853.81	12913		26	5.821e-05	10340.9	11061.7		26	5.821e-05	9338.2	9959.4		26	5.821e-05	9310.92	10394.8		26	5.821e-05	9658.73	11083.2
						27	6.054e-05	8932.19	14790		27	6.054e-05	9822.09	11919.4		27	6.054e-05	10654.2	11443		27	6.054e-05	9550.08	12221.5		27	6.054e-05	9804.18	12278.4		27	6.054e-05	10435.3	11344.4		27	6.054e-05	8778.95	9081.8		27	6.054e-05	9180.25	10274.1		27	6.054e-05	9727.6	10892.4
						28	6.286e-05	8654.97	15046.2		28	6.286e-05	9925.14	12686.2		28	6.286e-05	10453.2	11828.5		28	6.286e-05	9714.83	12289.4		28	6.286e-05	9637.09	11599.5		28	6.286e-05	10188	10277.5		28	6.286e-05	8715.34	9266.33		28	6.286e-05	9337.88	10656.3		28	6.286e-05	9587.6	11185.7
						29	6.519e-05	8472.77	13865.1		29	6.519e-05	9931.27	12763.1		29	6.519e-05	10474.5	11704.2		29	6.519e-05	9931.15	13151.3		29	6.519e-05	9426.65	10890.1		29	6.519e-05	10042.7	9985.86		29	6.519e-05	8759.06	9530.55		29	6.519e-05	9345.65	10927.6		29	6.519e-05	9113.09	11084.7
						30	6.752e-05	8813.56	13677.7		30	6.752e-05	9721.48	12237.2		30	6.752e-05	10392.4	11971.9		30	6.752e-05	10023.3	12642.9		30	6.752e-05	9418.6	10724.5		30	6.752e-05	10260	10064.3		30	6.752e-05	9161.33	10729.8		30	6.752e-05	8997.63	10660.8		30	6.752e-05	9206.15	11131.4
						31	6.985e-05	8329.92	13238.4		31	6.985e-05	9755.08	12341.7		31	6.985e-05	10282.5	10906		31	6.985e-05	10454.6	12778.8		31	6.985e-05	9704.94	10877.1		31	6.985e-05	10501.2	10881.1		31	6.985e-05	9434.09	10873		31	6.985e-05	9089.29	10794.7		31	6.985e-05	9381.51	11468.5
						32	7.218e-05	8438.85	12489.5		32	7.218e-05	9954.64	13097.4		32	7.218e-05	10525.9	10795.6		32	7.218e-05	10205.7	12467.6		32	7.218e-05	9808.54	11654.5		32	7.218e-05	10808.1	11324.3		32	7.218e-05	9307.84	10500		32	7.218e-05	9158.88	11408.5		32	7.218e-05	9419.46	11071.1
						33	7.451e-05	8362.78	13617.5		33	7.451e-05	9761.58	12019		33	7.451e-05	10434.5	11353.1		33	7.451e-05	9991.86	12180.8		33	7.451e-05	9905.05	12419.6		33	7.451e-05	11502.4	11635.8		33	7.451e-05	9082.5	10341.2		33	7.451e-05	9442.55	11946.8		33	7.451e-05	9186.25	11397.2
						34	7.683e-05	7930.36	12961.7		34	7.683e-05	9477.19	10601.5		34	7.683e-05	10313.6	11419		34	7.683e-05	10065.6	12335		34	7.683e-05	9933.3	12257.4		34	7.683e-05	10980.8	10672.7		34	7.683e-05	8994.08	10645.3		34	7.683e-05	9178.52	12196.6		34	7.683e-05	9565.49	12270.1
						35	7.916e-05	8138.45	12424.9		35	7.916e-05	9157.77	9583.35		35	7.916e-05	9954.62	10783.4		35	7.916e-05	10387.3	13367.2		35	7.916e-05	9928.8	11579.8		35	7.916e-05	10469.1	10338.3		35	7.916e-05	9017.66	10727.3		35	7.916e-05	9184.86	11572.2		35	7.916e-05	9903.02	11825.6
						36	8.149e-05	8159.23	12384.7							36	8.149e-05	9475.64	9397.6		36	8.149e-05	10504.5	13242.8		36	8.149e-05	9747.46	10568.9		36	8.149e-05	10216.9	10308		36	8.149e-05	8989.85	9878.24		36	8.149e-05	8994.19	10749.8		36	8.149e-05	10282.5	11617.2
						37	8.382e-05	8130.45	12605												37	8.382e-05	10295.2	12825.7		37	8.382e-05	9451.85	10091		37	8.382e-05	9990.24	9905.43		37	8.382e-05	8679.54	8912.1		37	8.382e-05	8529.14	9515.17
						38	8.615e-05	8092.79	12688.9												38	8.615e-05	9994.77	12090.6		38	8.615e-05	9423.82	10377.1		38	8.615e-05	9956.44	9930.8		38	8.615e-05	8359.66	8330.71
						39	8.848e-05	8557.43	12730.3												39	8.848e-05	9630.62	11507.4		39	8.848e-05	9544.24	10648.9		39	8.848e-05	9979.31	9893.3		39	8.848e-05	8043.3	7815.94
						40	9.08e-05	8555.29	12523.4												40	9.08e-05	9873.12	12526		40	9.08e-05	9702.51	11185.2		40	9.08e-05	9995.37	9385.19
						41	9.313e-05	8344.04	12313.3												41	9.313e-05	9831.21	12120.5		41	9.313e-05	9794.59	11785.7		41	9.313e-05	9814.07	8923.51
						42	9.546e-05	8379.14	12318.4												42	9.546e-05	9587.59	11136.4		42	9.546e-05	9524.39	11531
						43	9.779e-05	8298.18	12955.1												43	9.779e-05	9731.71	11235		43	9.779e-05	9145	10588.7
						44	0.0001001	8654.32	12959.8												44	0.0001001	9702.57	10901.6
						45	0.0001024	9057.57	12548.1												45	0.0001024	9809.27	11018.4
						46	0.0001048	8989.12	12201.9												46	0.0001048	9866.83	11960.8
						47	0.0001071	8711.07	11983.7												47	0.0001071	10229.6	11859.8
						48	0.0001094	8598.48	11662.6												48	0.0001094	10024.1	10949.5
						49	0.0001118	8948.05	13012.2												49	0.0001118	9924.74	11160.5
						50	0.0001141	8835.69	13146.2												50	0.0001141	10169.9	11367
						51	0.0001164	8667.41	13015.4												51	0.0001164	10132.1	12002.5
						52	0.0001187	8513.32	12447												52	0.0001187	10213.7	12018.3
						53	0.0001211	8430.44	11967.7												53	0.0001211	10115	12094.1
																					54	0.0001234	10221.6	11690.5
																					55	0.0001257	10404.3	11970.5
																					56	0.0001281	10336	12217.2
																					57	0.0001304	10330.6	12396.5
																					58	0.0001327	10268	11618
																					59	0.000135	9762.25	10604.4

## Sheet: Y_Nup60_N159_Sgf73D
	File					File	190404_Run15_N159_Nup60_Sgf73D_Br_1_MMStack_Pos2cell1asym_age2					190404_Run15_N159_Nup60_Sgf73D_Br_1_MMStack_Pos2cell2asym_age2					190404_Run15_N159_Nup60_Sgf73D_Br_1_MMStack_Pos2cell4asym_age2					190404_Run15_N159_Nup60_Sgf73D_Br_1_MMStack_Pos2cell5asym_age1					190404_Run15_N159_Nup60_Sgf73D_Br_1_MMStack_Pos2cell6asym_age1					190404_Run15_N159_Nup60_Sgf73D_Br_1_MMStack_Pos2cell7asym_age1					190404_Run15_N159_Nup60_Sgf73D_Br_1_MMStack_Pos2cell8asym_age1					190404_Run15_N159_Nup60_Sgf73D_Br_1_MMStack_Pos2cell9asym_age1					190404_Run15_N159_Nup60_Sgf73D_Br_1_MMStack_Pos4cell1asym_age2
	protein	Nup60_Sgf73D				protein	Nup60_Sgf73D					Nup60_Sgf73D					Nup60_Sgf73D					Nup60_Sgf73D					Nup60_Sgf73D					Nup60_Sgf73D					Nup60_Sgf73D					Nup60_Sgf73D					Nup60_Sgf73D
	Cells	35				Cell	1					2					4					5					6					7					8					9					1
	Age	1				Age	2					2					2					1					1					1					1					1					2
	correlation	0.500639				correlation	0.370508					0.433982					0.40366					0.760005					0.681207					0.448413					0.889659					0.606866					0.394492
	GFP	8899.71				GFP	10182.1					8995.05					9583.08					8961.24					9490.95					8912.05					10212					10187.1					7282.16
	stdev	554.188				stdev	497.371					567.102					468.197					599.527					521.06					478.849					846.894					512.618					417.293
	mCh	9811.97				mCh	10687.7					9678.26					9205.22					9293.47					10280.6					10199.9					10450.6					9828.53					9391.67
	stdev	710.831				stdev	746.522					852.268					527.339					967.934					668.463					875.55					1026.64					648.958					659.108
						1	0	10436	10185		1	0	8875	10316		1	0	9673	8724		1	0	9318	10641		1	0	9383	11041		1	0	8931	10751		1	0	9508	9593		1	0	10932	10188		1	0	7342	8872
						2	1	9952.83	9581.15		2	1	9062	9919		2	1	9695.43	8988.65		2	1	9923.04	9228.87		2	1	9524.99	11158.3		2	1	9067.82	10194.6		2	1	9876.24	9808.71		2	1	11023.8	10256.4		2	1	7729.67	9739.99
						3	2	9766.88	9646.94		3	2	8921	9182		3	2	9469.92	9375.48		3	2	9442.5	8938.71		3	2	9473.01	10649.3		3	2	9045.4	9498.45		3	2	9899.68	9507.72		3	2	11013.2	10364.5		3	2	7707.01	9837.11
						4	3	9680.84	10154.7		4	3	9539	10307		4	3	9487.48	9196.76		4	3	8876.81	8810.52		4	3	9467.32	10880.9		4	3	9282.08	9781.72		4	3	9828.38	9432.21		4	3	10444.4	9879.77		4	3	7598.62	9711.24
						5	4	10304.8	10750.3		5	4	9795.85	10002.9		5	4	9539.76	9013.1		5	4	8701.9	8956.44		5	4	9565.02	10920.1		5	4	8852.84	10000.4		5	4	9921.02	9900.78		5	4	10161.2	9960.31		5	4	7625.51	9978.94
						6	5	10464.2	10734.8		6	5	9924.35	10507.1		6	5	9538.74	9156.85		6	5	8748.75	9719.43		6	5	9514.6	10580.1		6	5	8725.38	10299.8		6	5	10418.6	10843.2		6	5	9811.47	9367.89		6	5	7711.83	10066.4
						7	6	10365.6	10943		7	6	9275.73	11163.9		7	6	9756.92	9382.58		7	6	9038.94	9087.25		7	6	9539.71	10153.1		7	6	8942.12	10094.4		7	6	10593.9	11180.4		7	6	9567.29	8558.86		7	6	7769.35	9996.31
						8	7	10406.2	11093.7		8	7	8728.52	11364.8		8	7	9779.53	9723.66		8	7	9042.56	8760.08		8	7	9406.39	9778.13		8	7	8966.92	9485.65		8	7	10400	11086		8	7	9995.54	8868.64		8	7	7650.69	9570.88
						9	8	10314.7	10997.5		9	8	8539.38	10294.9		9	8	10375.3	9407.86		9	8	9137.56	9276.87		9	8	9538.82	9853.92		9	8	9002.27	9750.13		9	8	10342.3	10942		9	8	10052	9260.54		9	8	7541.32	9002.52
						10	9	10046.7	11309.2		10	9	8538.4	9368.72		10	9	10659.5	9359.64		10	9	8964.25	9427.98		10	9	9607.28	10129		10	9	9188.35	10053		10	9	10453.4	10729.9		10	9	9475.78	8853.43		10	9	7414.1	8900.2
						11	10	10056.5	11135.1		11	10	8832.16	9719.25		11	10	10722.1	10038.5		11	10	9145.01	9079.78		11	10	9955.94	10264.3		11	10	9207.55	10261		11	10	10649	10682.8		11	10	9742.21	9497		11	10	7529.67	8847.29
						12	11	10355.9	11236.5		12	11	9168.61	9778.41		12	11	10468.7	10087.6		12	11	9441.77	9620.64		12	11	10380.2	10284.1		12	11	9593.72	10857.6		12	11	10672.5	12648.7		12	11	9666.64	9630.88		12	11	7613.52	9212.66
						13	12	10603.9	12248.8		13	12	8885.31	9371.82		13	12	9971.16	9834.98		13	12	9985.83	11159.8		13	12	10425.9	10489.1		13	12	9613.49	11483.1		13	12	11259	11553.5		13	12	10022.8	10602.8		13	12	7582.24	10148.8
						14	13	10066.7	12873.5		14	13	8413.34	9101.24		14	13	9282.92	9973.17		14	13	10006.4	11737.3		14	13	10119.3	10422.2		14	13	9651.93	11226.5		14	13	12099.9	11811.4		14	13	10514.1	11314.4		14	13	7291.72	10349.3
						15	14	9340.68	11763.3		15	14	8321.04	8899.96		15	14	9223.9	9379.87		15	14	9748.8	10681.3		15	14	9960.19	10479.1		15	14	9635.65	11113.7		15	14	12393.4	12570.9		15	14	10197.2	11132.2		15	14	6970.46	9378.77
						16	15	9249.03	10414.8		16	15	7766.65	7960.52		16	15	9187.29	9307.17		16	15	9669.27	10109.5		16	15	9741.92	10232.6		16	15	9808.81	10716.1		16	15	11688.8	11844.6		16	15	10422.7	10773.5		16	15	6960.91	8920.78
						17	16	9422.03	10063.5		17	16	7940.47	8070.24		17	16	9214.37	10093.1		17	16	9528.62	10154.9		17	16	9752.59	10680.4		17	16	9097.6	11316.1		17	16	10943.2	11268.4		17	16	10029.9	9984.15		17	16	6746.39	8326.96
						18	17	9661.23	10106.9		18	17	8014.27	9057.71		18	17	9159.19	9734.82		18	17	9377.18	10067.8		18	17	10122.6	10970.9		18	17	8937.03	11216.4		18	17	10222	11159.2		18	17	9907.82	9532.4		18	17	6492.76	8344.68
						19	18	9792.86	10553.3		19	18	8621.24	10293.2		19	18	9184.5	9534.31		19	18	9256.16	10030.9		19	18	10734.6	11701		19	18	9079.43	11070.3		19	18	9778.24	10163		19	18	10142.3	9583.35		19	18	6555.36	9125.12
						20	19	11542.7	11653.6		20	19	9390.52	11401		20	19	9124.96	8778.58		20	19	9469.34	10324.7		20	19	9959.27	11113.8		20	19	8748.33	11653.7		20	19	9319.43	9553.99		20	19	9739.12	9507.35		20	19	6629.32	9395.04
						21	20	10779.3	10646.9		21	20	9802.01	9814.5		21	20	9028.11	8626.74		21	20	9527.83	10441.1		21	20	9004.3	10522.4		21	20	8393.63	11231.7		21	20	9264.87	9137.34		21	20	9572.37	9368.47		21	20	6710.34	8740.82
						22	21	10272.9	10636.8		22	21	9372.31	8638.02		22	21	9116.46	8427.93		22	21	8642.54	10056.9		22	21	9133.77	10127.9		22	21	8394.64	10285.5		22	21	9540.13	9339.56		22	21	9604.18	9245.36		22	21	6807.24	8667.14
						23	22	10592.5	10883.8		23	22	8971.39	8373.23		23	22	9054.58	8640.62		23	22	8479.12	9221.31		23	22	9219.01	9775.16		23	22	8549.71	10161.1		23	22	9500.77	9861.41		23	22	9675.7	9673.53		23	22	6668.97	8946.69
						24	23	10690.8	10831.5		24	23	8965.75	9051.45		24	23	9426.81	8529.15		24	23	8277.41	9178.26		24	23	8919.11	9704.9		24	23	8082.12	10317.2		24	23	9402.75	9767.23		24	23	9783.23	9631.05		24	23	6773.06	9097.36
						25	24	10316.7	10346.6		25	24	8906.3	10067.6		25	24	9458.6	8435.45		25	24	8570.55	9804		25	24	8576.43	9345.67		25	24	8111.56	9585.94		25	24	9476.45	9948.25		25	24	10662.8	10236.2		25	24	7011.81	9667.19
						26	25	10073.7	10325.3		26	25	9069.73	9884.4		26	25	9557.38	8438.03		26	25	8928.03	10032.2		26	25	8805.63	9873.38		26	25	8026.98	8906.78		26	25	9584.36	9613.84		26	25	10686.3	10047.3		26	25	7268.19	11033.5
						27	26	9989.78	9956.03		27	26	8934.77	10121.1		27	26	9647.58	8775.08		27	26	8976.65	9534.16		27	26	9195.15	9938.33		27	26	8144.1	8827.28		27	26	9457.04	9298.68		27	26	10880.5	10148.6		27	26	7063.53	10831.4
						28	27	9895.28	9524.18		28	27	9167.41	9799.67		28	27	9767.09	9143.98		28	27	8394.98	8488.16		28	27	9005.65	9756.26		28	27	8510.8	9285.79		28	27	9442.72	9369.32		28	27	11254.3	10224.1		28	27	7478.26	9484.56
						29	28	9646.43	9849.39		29	28	9449.08	9140.21		29	28	9337.91	8843.84		29	28	8099.85	7781.27		29	28	9127.56	10111.8		29	28	8956.21	9656.5							29	28	10444.3	9336.56		29	28	7766.13	9116.82
						30	29	10100	10646.6		30	29	9623.99	9286.56							30	29	7904.17	7604.15		30	29	9245.14	10347.6		30	29	8975.99	8942.88												30	29	7555.89	9174.8
						31	30	10767.1	10833.4		31	30	10030.9	9769.63							31	30	7935.3	8102.42		31	30	9305.39	10501.5		31	30	8749.96	8172.08												31	30	7686.44	9652.48
						32	31	11109.6	10901.3												32	31	8069.39	8232.13		32	31	8988.6	9472.75																	32	31	7701.47	9395.79
						33	32	9945.36	9867.03												33	32	8057.61	7595.99		33	32	8502.7	8001.75																	33	32	7357.53	8391.52
																					34	33	8078.94	8489.75
																					35	34	8379.07	8165.74
																					36	35	8523.3	7979.74
																					37	36	8593.16	7975.94
																					38	37	8668.91	8609.75
																					39	38	8761.41	9384.74
																					40	39	9425.71	9894.89
																					41	40	9878.43	9067.59
																					42	41	9377.02	8871.6

## Sheet: A_Nup60_N159_Sgf73D
	File					File	190404_Run15_N159_Nup60_Sgf73D_Br_1_MMStack_Pos2cell1asym_age18					190404_Run15_N159_Nup60_Sgf73D_Br_1_MMStack_Pos2cell2asym_age17					190404_Run15_N159_Nup60_Sgf73D_Br_1_MMStack_Pos2cell3asym_age22					190404_Run15_N159_Nup60_Sgf73D_Br_1_MMStack_Pos2cell4asym_age21					190404_Run15_N159_Nup60_Sgf73D_Br_1_MMStack_Pos2cell5asym_age18					190404_Run15_N159_Nup60_Sgf73D_Br_1_MMStack_Pos2cell7asym_age19					190404_Run15_N159_Nup60_Sgf73D_Br_1_MMStack_Pos2cell9asym_age19					190404_Run15_N159_Nup60_Sgf73D_Br_1_MMStack_Pos2cell10asym_age16					190404_Run15_N159_Nup60_Sgf73D_Br_1_MMStack_Pos3cell1asym_age19
	protein	Nup60_Sgf73D				protein	Nup60_Sgf73D					Nup60_Sgf73D					Nup60_Sgf73D					Nup60_Sgf73D					Nup60_Sgf73D					Nup60_Sgf73D					Nup60_Sgf73D					Nup60_Sgf73D					Nup60_Sgf73D
	Cells	32				Cell	1					2					3					4					5					7					9					0					1
	Age	18				Age	18					17					22					21					18					19					19					16					19
	correlation	0.525692				correlation	0.364401					0.617348					0.539554					0.139051					0.534479					0.723					0.471931					0.236962					0.1116
	GFP	9205.34				GFP	9131.06					9131.99					9867.59					9184.64					9417.52					9265.32					10016.4					8143.57					9037.87
	stdev	585.61				stdev	746.1					565.96					559.2					694.426					492.492					656.982					723.131					308.779					518.957
	mCh	11376.8				mCh	11413.4					10980					12333.6					11162.7					11459.4					10655.5					11470.7					9135.5					10869.5
	stdev	1158.93				stdev	852.213					998.963					908.445					1391.43					779.922					1165.38					1667.27					1181.02					1413.18
						1	0	10377	10876		1	0	9689	12206		1	0	10186	12932		1	0	10618	10839		1	0	9435	11939		1	0	8820	10842		1	0	8464	7826		1	0	8576	8407		1	0	9307	10285
						2	1	10277	11960		2	1	9468	11538		2	1	9929.47	11911.1		2	1	10388.6	11259.7		2	1	8846	11319		2	1	8878.6	11387		2	1	9159.79	8051.51		2	1	8091.59	8739.64		2	1	9310.3	11113.6
						3	2	9880	11278		3	2	9629	11993		3	2	9536.72	11117.5		3	2	10129.9	11350.9		3	2	9292	11273		3	2	8923.13	10995.1		3	2	9497.31	9579.94		3	2	8238.11	8592.48		3	2	9356.62	10991.3
						4	3	9228	11096		4	3	9805.09	12488.6		4	3	9501.36	11486.1		4	3	9356.08	10130.8		4	3	9864	11917		4	3	8835.54	9964.79		4	3	9716.9	10291.1		4	3	8341.99	8347.04		4	3	9123.7	10512.8
						5	4	9840	11458		5	4	9477.27	12063.8		5	4	9880.82	11598.5		5	4	9271.73	9758.96		5	4	10340	12226		5	4	8723.27	9060.57		5	4	9694.05	10623.6		5	4	8153.68	8933.43		5	4	9132.6	10268.4
						6	5	10132	11826		6	5	9170.84	11336.4		6	5	10245.3	12230.3		6	5	9234.35	10334.1		6	5	9776.65	12187.6		6	5	8878.03	9211.4		6	5	9525.76	10749.8		6	5	7956.66	9256.81		6	5	9488.65	10051.2
						7	6	10132	11982.9		7	6	8947.08	10532.6		7	6	10382.9	12719.2		7	6	8839.21	10558.6		7	6	9141.68	12445.1		7	6	8991.4	9015.78		7	6	9791.94	11291.9		7	6	7951.18	9242.55		7	6	9294.31	10032.2
						8	7	9944.99	12108.8		8	7	8804.98	10497.1		8	7	10366	13159.5		8	7	8963.78	10390.3		8	7	8689.94	11410.2		8	7	9135.22	10330.4		8	7	10131.2	12115.1		8	7	7835.11	9474.63		8	7	8981.76	10020.5
						9	8	9669.86	12090.3		9	8	8751.33	10264.1		9	8	10001.8	12894.1		9	8	8964.35	9966.16		9	8	8647.27	11044.5		9	8	9408.68	11853.6		9	8	10628.6	13484.3		9	8	7618.82	9632.98		9	8	9337.91	10740
						10	9	9245.82	11351.4		10	9	9555.22	10491.7		10	9	9271.88	13197.4		10	9	8743.62	10016.1		10	9	9224.27	11760		10	9	9947.88	11076		10	9	10800	13414.1		10	9	8522.15	10247.4		10	9	9392.57	10935.5
						11	10	8859.56	10639.9		11	10	10110.2	10472.3		11	10	9224.49	12879.5		11	10	8490.5	10620.7		11	10	9282.44	12032.3		11	10	10177.6	10844.9		11	10	11164.5	12587.5		11	10	8308.8	11205.1		11	10	9619.01	11172.7
						12	11	8857.13	10157.5		12	11	10030.6	11139.9		12	11	8554	11960		12	11	8111.15	11464.9		12	11	9069.81	11382.7		12	11	9987.67	11157.7		12	11	11593.9	12511.1		12	11	7968.6	11220		12	11	10430	11819.4
						13	12	8768.98	10641.7		13	12	9608.07	11435.4		13	12	8872	11907		13	12	8174.55	11477.8		13	12	9127.56	10765.4		13	12	10134.2	11812		13	12	11333.8	12385.3		13	12	7722.77	10130.7		13	12	9965.66	12260.6
						14	13	8672.26	10996.6		14	13	9126.95	11680.4		14	13	9013	12402		14	13	8056.05	12936.1		14	13	9348.22	10953.3		14	13	9808.94	12404.5		14	13	11442.2	12607.8		14	13	8078.94	10781		14	13	8671.89	11678
						15	14	8693.45	10738.3		15	14	8836.99	11352.7		15	14	9094	12108		15	14	8376.15	13908.6		15	14	9224.98	11244		15	14	9745.16	11822.1		15	14	11185.7	11908.9		15	14	8329.58	11684.5		15	14	8346.76	10462.2
						16	15	8956.38	10458		16	15	8224.92	10711.8		16	15	10103.3	12811.1		16	15	8548.3	13640		16	15	8946.84	11183.7		16	15	9845.42	11757.6		16	15	10602.4	11162.1		16	15	8377.9	10935		16	15	8273.1	9947.01
						17	16	9232.34	10977		17	16	8367.46	10319.7		17	16	10510.1	13303.6		17	16	8946.92	13075.9		17	16	8914.24	11255.9		17	16	9954.98	11760.8		17	16	9965.66	10704.1		17	16	8493.58	10178.7		17	16	8160.38	10205.9
						18	17	9108.45	11128.1		18	17	8467.83	10599.7		18	17	10666.6	13266.8		18	17	9567.96	12725.1		18	17	8922.69	12419.3		18	17	10181.5	12075		18	17	9694.04	10581.1		18	17	8350.82	9975.52		18	17	8078.25	10172.2
						19	18	8535	11354		19	18	8263.49	10141.4		19	18	10293.7	12917.9		19	18	9775.46	12439.4		19	18	9532.56	12633.3		19	18	10277	12070.7		19	18	9459.24	10566.1		19	18	8102.74	9534.02		19	18	8297.89	11846.9
						20	19	8441.2	11308.8		20	19	8253.91	10206.1		20	19	10031.5	13288.2		20	19	10049.3	11342.3		20	19	9942.55	11804.9		20	19	10235	11630.4		20	19	9333.89	10240.6		20	19	8050.89	9286.25		20	19	8494.11	13299.9
						21	20	8579.4	11994.2		21	20	8822.72	11815.7		21	20	10529.3	13330.3		21	20	9635.1	10667.7		21	20	9883.32	11226.6		21	20	10086.5	10762.2		21	20	9362.96	10086.3		21	20	8140.19	9401.2		21	20	8693.26	14913.4
						22	21	8345.8	12674.2		22	21	8926.41	11865.2		22	21	9867.33	11206.4		22	21	9440.53	10275		22	21	9742.47	11220.6		22	21	9595.35	10477.8		22	21	9296.69	9981.59		22	21	8198.69	9026.27		22	21	8698.03	14112.5
						23	22	8260.3	12472.3		23	22	9481.95	11702.9		23	22	10146	11362.8		23	22	8667.85	10045.1		23	22	9987.03	10963.8		23	22	9122.83	10209		23	22	9374.69	10648.2		23	22	8152.2	8535.21		23	22	9003.07	12195.4
						24	23	8264.67	12382.7		24	23	9608.81	11355.4		24	23	10371.1	11695.3		24	23	8481.72	9471.06		24	23	9890.54	11398.8		24	23	9138.93	10297.8		24	23	9542.09	12684.7		24	23	8104.84	8221.63		24	23	9516.65	11552.2
						25	24	8135.07	11479.1		25	24	9421.42	11375.9		25	24	10148	11862.3		25	24	8835.38	11881.1		25	24	10233.8	11889.8		25	24	8882.93	11005.1		25	24	9628.4	15542.3		25	24	7958.81	7663.25		25	24	9327.82	10957.9
						26	25	8361.9	11184.1		26	25	9645.9	11440.6		26	25	9917.17	12373		26	25	9225.25	13960.1		26	25	10041.3	12419		26	25	8599.78	10389.4		26	25	9616.5	15084.2		26	25	7963.94	7531.81		26	25	8815.77	10280.3
						27	26	8334.03	11081.1		27	26	9598.77	11953.3		27	26	9945.69	13367.4		27	26	9477.72	13165.1		27	26	9953.74	12234.6		27	26	8406.25	10257.1		27	26	9701.5	12614		27	26	7529.91	7436.98		27	26	8788.69	10086.3
						28	27	8302.2	10164.6		28	27	9255.72	10993.9		28	27	9806.28	13094.3		28	27	9107.3	11303.2		28	27	10021.3	12392.7		28	27	8709.69	11011.9		28	27	9521.61	12295		28	27	7324.24	6708.36		28	27	8940.25	10611.1
						29	28	8176.99	9346.05		29	28	9064.89	9788.64		29	28	9703.88	12088.3		29	28	9320.7	11270.5		29	28	9886.65	11977.3		29	28	8791.66	10934.8		29	28	10003.9	13415.8		29	28	7938.34	8179.2		29	28	8954.5	11211.7
						30	29	8394	10833.1		30	29	8578.88	8535.08		30	29	10103.1	12797.5		30	29	9138.42	11594		30	29	9695.72	11050.7		30	29	8637.42	10319.2		30	29	10644.1	14229.4		30	29	8423.82	8948.41		30	29	9171.98	10780.7
						31	30	8336.8	11447		31	30	8098.01	8081.44		31	30	10587.9	13738.9		31	30	9454.54	11358.1		31	30	9436.47	11153.1		31	30	8376.56	9419.4		31	30	10518.7	12165.6		31	30	8462.39	8478.59		31	30	9237.31	10942.4
						32	31	8907.28	12219.4							32	31	10556.3	13143.4		32	31	9239.24	11524.5		32	31	8995.95	10937.4		32	31	8289.9	8061.41		32	31	10337	10824.6		32	31	8530.43	8336.56		32	31	9360.21	11146
						33	32	10128.1	13593.1							33	32	9999.3	12028.6		33	32	9478.73	10759.1		33	32	9090.64	11233.8		33	32	8228.57	7412.98		33	32	10829.9	10567.6		33	32	8612.46	8298.72		33	32	9546	10440
						34	33	10447.1	13036.7							34	33	9954.53	11687.6		34	33	9547.05	10482.7		34	33	9235.66	10800.4							34	33	10305.8	10480.4		34	33	8471.23	8036.07		34	33	9284	8498
						35	34	10075.2	12267.5							35	34	9287.92	10619.5		35	34	10015.3	10849.4		35	34	8989.29	9750.11							35	34	9924.27	10372.1							35	34	8358	7396
						36	35	9937.3	11626.1							36	35	8644.59	9522.56		36	35	10337.4	11571		36	35	8378.12	8695.37							36	35	9750.5	10531.4							36	35	8605.44	8363.22
						37	36	9637.79	10941												37	36	10053.6	11140.1												37	36	9629.49	10670.3
						38	37	9505	10540												38	37	8499.36	8526.27												38	37	9451.16	11011
																					39	38	7639.84	7264.15

## Sheet: Y_Nup170_N159_Sgf73D
	File					File	190416_Run16_N159_N170_Sgf73D_Fob1D_Br_3_MMStack_Pos2cell2asym_age2					190416_Run16_N159_N170_Sgf73D_Fob1D_Br_3_MMStack_Pos2cell3asym_age2					190416_Run16_N159_N170_Sgf73D_Fob1D_Br_3_MMStack_Pos2cell5asym_age2					190416_Run16_N159_N170_Sgf73D_Fob1D_Br_3_MMStack_Pos2cell7asym_age1					190416_Run16_N159_N170_Sgf73D_Fob1D_Br_3_MMStack_Pos2cell8asym_age3					190416_Run16_N159_N170_Sgf73D_Fob1D_Br_3_MMStack_Pos2cell9asym_age1					190416_Run16_N159_N170_Sgf73D_Fob1D_Br_3_MMStack_Pos2cell10asym_age1					190416_Run16_N159_N170_Sgf73D_Fob1D_Br_3_MMStack_Pos2cell11asym_age2					190416_Run16_N159_N170_Sgf73D_Fob1D_Br_3_MMStack_Pos2cell13asym_age1
	protein	Nup170_Sgf73D				protein	Nup170_Sgf73D					Nup170_Sgf73D					Nup170_Sgf73D					Nup170_Sgf73D					Nup170_Sgf73D					Nup170_Sgf73D					Nup170_Sgf73D					Nup170_Sgf73D					Nup170_Sgf73D
	Cells	34				Cell	2					3					5					7					8					9					0					1					3
	Age	2				Age	2					2					2					1					3					1					1					2					1
	correlation	0.694675				correlation	0.596499					0.902187					0.842851					0.636118					0.800021					0.718233					0.831529					0.850712					0.775258
	GFP	10315.6				GFP	10402.5					10255.9					9468.14					9081.54					9637.81					11064.5					10475.6					10432.2					11056.4
	stdev	523.667				stdev	581.876					575.021					624.002					437.168					543.3					509.252					488.374					546.154					525.923
	mCh	11052.4				mCh	11550.7					11037.6					11145.2					10490.5					10684.2					11803.8					11341					10969.7					11479.3
	stdev	1001.64				stdev	1039.4					889.036					1075.17					578.89					1222.55					1063.59					956.462					1378.91					829.509
						1	0	11909	12943		1	0	11523	12380		1	0	10072	11268		1	0	9294	10813		1	0	9863	11451		1	0	11586	11905		1	0	9797	10492		1	0	10353	10631		1	0	11653	12400
						2	1	11093.9	12021.6		2	1	10666.8	11772		2	1	10174	11451.4		2	1	9303.09	9994.19		2	1	9418.1	10825.5		2	1	10606.4	11359		2	1	10415	11733.8		2	1	10220.5	9780.12		2	1	11534.4	12412.2
						3	2	10802.5	11367.9		3	2	10477.8	11275.5		3	2	10029.2	12177.1		3	2	9384.27	10175.9		3	2	9365.47	10628.3		3	2	10088.1	10411.3		3	2	10746.7	11670.2		3	2	10250.9	9626.34		3	2	11866.5	12318.6
						4	3	10858.1	11106.7		4	3	10590.3	11048.8		4	3	9733.42	12636.1		4	3	9143.27	10843.9		4	3	9709.57	10113.2		4	3	10363.6	10221		4	3	10975.6	11036.2		4	3	10378.6	9768.06		4	3	11715.6	12563
						5	4	10544.3	11312.8		5	4	10491.3	10989.7		5	4	9682.16	11886.2		5	4	9066.75	11109.6		5	4	9549.47	9547.55		5	4	10540.8	10828.3		5	4	10267.1	10726.7		5	4	10620	9912.24		5	4	11640.5	12192.3
						6	5	10182.1	11214.2		6	5	10809.3	11223.6		6	5	9305.22	11451.7		6	5	9297.97	10872.5		6	5	9378.99	9488.2		6	5	10617.2	11623.2		6	5	10773.9	12347.8		6	5	10382.8	10033.1		6	5	11414.8	11870.5
						7	6	10028.8	10473.3		7	6	10570.4	11221		7	6	8713.65	10389		7	6	9209.34	10483.9		7	6	9375.39	9511.15		7	6	10818.6	11263.2		7	6	11300.6	12541.9		7	6	10471.6	10788.3		7	6	11259	11222.8
						8	7	10100.9	10526		8	7	10380	11310.7		8	7	8598.23	9690.67		8	7	9105.48	10638.4		8	7	9736.16	9641.44		8	7	10890.5	11042.2		8	7	10901.9	12586.4		8	7	10832	11568.9		8	7	10850.7	10530.9
						9	8	10210.9	10886.3		9	8	10080.3	11069.5		9	8	8466.1	9235.27		9	8	9108.8	10538.7		9	8	10225.7	10365.2		9	8	11187.2	11303.4		9	8	11095.1	12841.7		9	8	10930.8	11947		9	8	10814	10117.5
						10	9	10288	11017.2		10	9	9834.82	10389.4		10	9	8345.63	8837.31		10	9	9477.81	11193.5		10	9	10073.6	11566.9		10	9	11393.9	11342.9		10	9	11278.7	13149.3		10	9	10854.8	12266.1		10	9	10996	10414.9
						11	10	10401.8	10644.8		11	10	9481.66	9589.34		11	10	8252.99	9068.14		11	10	9751.49	11409.5		11	10	10241.1	12522.7		11	10	11598.9	11641.8		11	10	11023.5	12589.2		11	10	11303.1	13693.6		11	10	11245.3	11116
						12	11	10435.4	11133.2		12	11	9244.55	9195.69		12	11	8507.8	9705.8		12	11	9679.55	11123.8		12	11	10490.5	12276.8		12	11	11463.4	11644.5		12	11	10746.2	11761.5		12	11	11771.3	14420.5		12	11	11558.8	11964
						13	12	10726.7	11908.7		13	12	9302.2	9254.75		13	12	9122.83	10831.1		13	12	9761.91	11277		13	12	10491.3	12291.1		13	12	11507.2	11787.4		13	12	10626.6	11672.4		13	12	11616.4	13427.3		13	12	11412.9	13039.3
						14	13	10727.5	12543.4		14	13	9386.35	9548.2		14	13	9632.27	11427.2		14	13	9799.55	10793.5		14	13	10482.2	11932.2		14	13	11768.9	11803.9		14	13	10751.4	11727.1		14	13	11057.9	12272.9		14	13	11327.9	12239.6
						15	14	10390.5	12911.9		15	14	9513.96	10143.2		15	14	9890.57	11589.9		15	14	9689.5	10485.6		15	14	10684.7	12150.9		15	14	11528.5	12266.4		15	14	10768.8	11567.4		15	14	11032	11804.4		15	14	11638.8	11730.8
						16	15	10280	13296.8		16	15	9574.3	10772.9		16	15	10082.7	11408.8		16	15	9475.78	10590.8		16	15	10490.6	12351.7		16	15	11199.4	12098.6		16	15	10922.4	11269.5		16	15	10377.4	10943.3		16	15	11048.3	11322.7
						17	16	10202	12878		17	16	10127	10751		17	16	9737	12149.2		17	16	9122.6	10456.8		17	16	10263.7	12381.6		17	16	10775.5	11733.7		17	16	10730	11043.5		17	16	10460.9	11065		17	16	10319	10796.1
						18	17	10495.3	12574.9		18	17	10106.3	10948.2		18	17	9453.47	11441.5		18	17	8761.38	10432.7		18	17	9550.81	12589.4		18	17	10954.2	13403		18	17	10438.2	10979.7		18	17	10110.2	10597.6		18	17	10344.4	10701
						19	18	10136.6	11936.7		19	18	10009	11625.4		19	18	9268.88	11431.2		19	18	8649.65	9845.61		19	18	9507.36	11667.1		19	18	11397.5	13926.1		19	18	10375.2	11159.9		19	18	9747.26	9919.64		19	18	10166.4	10751.8
						20	19	10036.2	11567.6		20	19	10682.3	11863.6		20	19	9587.26	11375		20	19	8235.52	9713.72		20	19	9326	11120.1		20	19	11524.5	13024.4		20	19	10175	11464.3		20	19	10190.4	11024.2		20	19	10215.7	10717.9
						21	20	9441.35	10869.3		21	20	10980.2	12231.6		21	20	9740.02	11498.3		21	20	8556.64	10648.3		21	20	9116.8	10236.4		21	20	11223.3	12566.6		21	20	9596.06	11047.7		21	20	10182.8	11288.1		21	20	10330.9	10942.2
						22	21	9610.46	10824.6		22	21	10657.3	12210.4		22	21	9961.6	12285.5		22	21	8721.86	10639.8		22	21	9153.18	9561.59		22	21	11535.4	13291.2		22	21	10008.4	10852		22	21	10152.8	10984.7		22	21	10312.3	10516
						23	22	9557.49	10678.7		23	22	10649.2	11684		23	22	10089.5	12616.1		23	22	8667.14	9721.02		23	22	9034.54	9910.41		23	22	11406.5	13386.1		23	22	9744.9	9708.89		23	22	9949.62	11130.9		23	22	10481.3	10562.6
						24	23	9636.59	10464.2		24	23	10652.1	11468.7		24	23	10169.6	11926.5		24	23	8470.54	9542.08		24	23	9217.26	9956.01		24	23	10915.7	12514.7		24	23	9934.1	10281		24	23	10012.7	11554.1		24	23	10814.5	11391
						25	24	9757.67	11148.3		25	24	10468.3	11702.9		25	24	10079.2	11310.4		25	24	8656.99	10328		25	24	9206.35	9865.17		25	24	11472.1	12780.5		25	24	10178.3	11062.7		25	24	9950.71	10863.8		25	24	11224.2	12224
						26	25	10493.2	12703.8		26	25	10394.8	11307.8		26	25	10254.3	11068		26	25	8774.24	11507.2		26	25	9159.65	10174.4		26	25	11628.5	12977.3		26	25	10434.1	11834.7		26	25	9952.58	10067.2		26	25	11165.4	12643.5
						27	26	11453.2	13493.1							27	26	9920.12	11997.8		27	26	9234.27	10710.8		27	26	8991.3	9568.3		27	26	11498	11884.1		27	26	10220.6	10942.7		27	26	9948.19	9404.22		27	26	11173.1	11240.4
						28	27	11341.1	12239.6							28	27	9456.89	12094.7		28	27	8765.85	9856.61		28	27	9103.76	9480.21		28	27	10830.2	11758.9		28	27	9850.31	9702.33		28	27	9794.58	8883.77
						29	28	11120.8	11920							29	28	8957.68	10925.3		29	28	8837.82	9615.09		29	28	9662.4	11134.3		29	28	10493.5	10636.2		29	28	9715.7	9096.53		29	28	9628	8454.89
						30	29	10470	10606.4							30	29	8759.72	9182.56		30	29	8443.16	9354.23		30	29	9719.37	10503.6		30	29	10245.7	9950.57
						31	30	9745.8	8859.36																	31	30	9215.19	9261.45		31	30	9938.93	9542.02
																										32	31	8606.65	7820.57

[truncated: 1 more sheets: A_Nup170_N159_Sgf73D]
