# Supplementary material for: DNA circles promote yeast ageing in part through stimulating the reorganization of nuclear pore complexes
Source: eLife. 2022 Apr 4;11:e71196. doi: 10.7554/eLife.71196 (PMC9020822; doi:10.7554/eLife.71196)
Supplement: Figure 3—source data 2. [file elife-71196-fig3-data2.xlsx]

## Sheet: Overview
		age	correlation (avg)	correlation (avg)				age	correlation (avg)	correlation (avg)				age	correlation (avg)	correlation (avg)				age	correlation (avg)	correlation (avg)				age	correlation (avg)	correlation (avg)				age	correlation (avg)	correlation (avg)
		2	0.807045	0.77115				22	0.738386	0.755256				2	0.673502	0.642893				22	0.369265	0.60182				2	0.53954	0.487374				20	0.241807	0.501721
	Y_Nup170-Nup159	age	cMother	cDaughter			A_Nup170-Nup159	age	cMother	cDaughter			Y_Nup60_Nup159	Age	cMother	cDaughter			A_Nup60_Nup159	Age	cMother	cDaughter			Y_Mlp1-Nup159	age	cMother	cDaughter			A_Mlp1-Nup159	age	cMother	cDaughter
	Y_Nup170-Nup159	Y_N170	Y_N170	Y_N170			A_Nup170-Nup159	A_N170	A_N170	A_N170			Y_Nup60_Nup159	Y_N60	Y_N60	Y_N60			A_Nup60_Nup159	A_N60	A_N60	A_N60			Y_Mlp1-Nup159	Y_M1	Y_M1	Y_M1			A_Mlp1-Nup159	A_M1	A_M1	A_M1
	Y_Nup170-Nup159	ageY_N170	cMotherY_N170	cDaughterY_N170			A_Nup170-Nup159	ageA_N170	cMotherA_N170	cDaughterA_N170			Y_Nup60_Nup159	AgeY_N60	cMotherY_N60	cDaughterY_N60			A_Nup60_Nup159	AgeA_N60	cMotherA_N60	cDaughterA_N60			Y_Mlp1-Nup159	ageY_M1	cMotherY_M1	cDaughterY_M1			A_Mlp1-Nup159	ageA_M1	cMotherA_M1	cDaughterA_M1
	1	2	0.869003	0.570555			1	24	0.79208	0.848872			1	3	0.552529	0.663395			1	14	0.481102	0.651728			1	3	0.782573	0.512797			1	22	-0.149629	0.350987
	2	1	0.797025	0.944778			2	17	0.918112	0.668549			2	1	0.712405	0.688151			2	25	0.891455	0.787974			2	2	0.700846	0.867612			2	20	-0.046961	-0.143448
	3	3	0.838552	0.887501			3	20	0.726207	0.672125			3	1	0.767664	0.938308			3	25	0.0804194	0.586728			3	1	0.42193	0.633382			3	20	-0.50912	0.486755
	4	1	0.796948	0.938778			4	22	0.570446	0.766515			4	3	0.304857	0.545698			4	20	0.236749	0.476029			4	1	0.625132	0.490102			4	22	0.164595	0.428067
	5	2	0.839269	0.92847			5	20	0.557738	0.93415			5	3	0.84109	0.758117			5	22	0.536346	0.717357			5	1	0.928291	0.443843			5	23	0.735047	0.581268
	6	3	0.829713	0.746064			6	23	0.863504	0.642355			6	3	0.898978	0.361809			6	25	0.0750688	0.460524			6	1	0.581093	0.804694			6	21	0.552727	0.601334
	7	2	0.90011	0.929775			7	21	0.939092	0.925263			7	2	0.888339	0.802797			7	22	0.678097	0.91028			7	3	0.309422	0.763039			7	21	0.670386	0.421079
	8	2	0.786949	0.925191			8	24	0.636454	0.929448			8	2	0.655574	0.806526			8	19	0.135611	0.639973			8	1	-0.170383	-0.619322			8	19	0.511705	0.753577
	9	3	0.903671	0.815821			9	22	0.857648	0.61533			9	1	0.704957	0.802509			9	14	-0.289015	0.664546			9	1	0.756221	0.413866			9	19	0.544682	0.560253
	10	3	0.774687	0.732903			10	24	0.845479	0.696758			10	2	0.747006	0.86077			10	22	-0.112372	0.195964			10	2	0.843741	0.560768			10	23	0.159549	0.882899
	11	1	0.666889	0.87377			11	23	0.746649	0.910764			11	2	0.583126	0.74962			11	25	0.41203	0.514513			11	2	0.51295	0.512588			11	22	0.310804	0.331632
	12	2	0.891997	0.823737			12	19	-0.0800517	0.653965			12	3	0.790334	0.819242			12	23	0.067659	0.566522			12	1	0.436647	0.580737			12	16	-0.483838	0.443698
	13	3	0.718755	0.698717			13	21	0.758647	0.647343			13	2	0.675836	0.757119			13	20	0.299014	0.733964			13	3	0.380435	0.273867			13	21	0.573255	0.608776
	14	2	0.777589	0.816953			14	22	0.575004	0.719599			14	2	0.620822	0.306645			14	15	0.747444	0.500232			14	3	0.35352	0.228232			14	21	0.83005	0.863674
	15	2	0.871522	0.381768			15	14	0.951212	0.83006			15	1	0.611253	0.323429			15	22	0.686443	0.730296			15	2	0.576601	0.47634			15	19	-0.534107	0.779073
	16	2	0.863507	0.461249			16	22	0.82317	0.746969			16	2	0.770201	0.720629			16	21	0.46247	0.662757			16	2	0.512801	0.338179			16	18	0.379282	0.826347
	17	3	0.815382	0.390878			17	19	0.798038	0.667406			17	1	0.590478	0.046835			17	15	0.299128	0.554336			17	3	0.474206	0.736942			17	18	-0.504699	-0.274278
	18	3	0.952265	0.749031			18	20	0.850304	0.790966			18	1	0.746686	0.683832			18	24	0.443834	0.621107			18	2	0.751995	0.8004			18	17	0.376827	0.873073
	19	1	0.764314	0.891304			19	23	0.788223	0.679022			19	1	0.834188	0.762767			19	22	0.569254	0.613046			19	3	0.397113	0.57859			19	24	0.567321	0.181607
	20	1	0.601678	0.926751			20	22	0.909397	0.49187			20	1	0.595461	0.700744			20	23	-0.232113	0.556531			20	2	0.739121	0.73693			20	21	0.365248	0.502991
	21	3	0.853547	0.812016			21	22	0.72743	0.863672			21	3	0.819517	0.717616			21	23	0.872539	0.541158			21	1	0.401477	-0.00473782			21	16	0.0473401	0.633505
	22	3	0.694668	0.90664			22	21	0.848908	0.856422			22	2	0.329066	0.64077			22	22	0.714028	0.742822			22	2	0.762764	0.193787			22	19	0.362759	0.500551
	23	2	0.822985	0.766036			23	21	0.772351	0.79983			23	2	0.884198	0.70042			23	24	0.181295	0.645815			23	3	0.119117	0.690659			23	20	0.757531	0.125661
	24	2	0.880232	0.893042			24	21	0.700917	0.968078			24	2	0.826747	0.592017			24	21	0.181393	0.540717			24	3	0.548003	0.593109			24	19	0.440234	0.834914
	25	3	0.619086	0.498393			25	16	0.841645	0.73287			25	2	0.415947	0.732575			25	17	0.373498	0.829171			25	2	0.57478	0.354506			25	21	0.128799	0.199609
	26	3	0.713903	0.699187			26	22	0.494088	0.755013			26	1	0.544135	0.691084			26	23	0.184393	0.221315			26	3	0.707644	0.710814			26	17	0.0371819	0.691134
	27	2	0.945971	0.811735			27	23	0.723721	0.578696			27	2	0.309636	0.254159			27	17	0.796182	0.281528			NA	NA	NA	NA			NA	NA	NA	NA
	NA	NA	NA	NA			NA	NA	NA	NA			28	1	0.837041	0.573405			28	25	0.567474	0.904025			NA	NA	NA	NA			NA	NA	NA	NA

## Sheet: Y_Mlp1-Nup159
					181101_Run8_Nu170_Mlp1_refNup159__1_MMStack_Pos22cell2asym_age3																181101_Run8_Nu170_Mlp1_refNup159__1_MMStack_Pos22cell3asym_age2																181101_Run8_Nu170_Mlp1_refNup159__1_MMStack_Pos22cell4asym_age1
		SEM	ttest
cMother	0.53954	0.046634	0.360754		correlation	0.782573															correlation	0.700846															correlation	0.42193
cDaughter	0.487374	0.0608212									0.512797																0.867612																0.633382
cRandom	0.155003															0.0817189																0.445077																-0.00322946
Age	2					3																2																1
n	26				Intensity	19557.3	11221.3				19634.8	11203.4				17173.4	7953.23				Intensity	18703.8	10914.1				18369.8	10460.5				16278.4	7431.97				Intensity	19614.8	11585				20508.9	11567.5				17389.1	7949.26
					Bgcorrected	2383.87	3268.09				2461.4	3250.2									Bgcorrected	2425.39	3482.08				2091.38	3028.51									Bgcorrected	2225.62	3635.75				3119.72	3618.2
										ratioDM	1.03252															ratioDM	0.862288															ratioDM	1.40173
												0.994528																0.86974																0.995174
				M					D					BG						M					D					BG						M					D					BG
				1	0	19179	11853		1	0	21069	11712		1	0	17050	8190			1	0	18646	11784		1	0	19866	11844		1	0	16681	7510			1	0	19129	11357		1	0	20657	11569		1	0	17435	7790
				2	1	19851	12776.4		2	1	21878	11744		2	1	17511.1	8029.97			2	1	19380.9	11556.7		2	1	19660.7	11478.6		2	1	16357.2	7391.2			2	1	20073.5	12129.6		2	1	20143	11512.2		2	1	17501.4	7881.63
				3	2	20846.3	12278.8		3	2	20073	11357		3	2	17227.1	7972.2			3	2	19853.4	11349.1		3	2	20334	11508		3	2	16318.4	7396.9			3	2	21735.1	12363.6		3	2	20090.1	12053.8		3	2	17426.7	7808.02
				4	3	20235.1	12036.8		4	3	19209.6	10553.4		4	3	16922.4	8048.12			4	3	20370.7	11352.9		4	3	20568.6	10961.2		4	3	16370.4	7368.65			4	3	21154.6	12761		4	3	21082.7	11940.5		4	3	17273.4	7635.52
				5	4	19921.1	12172.7		5	4	18774.6	10644.8		5	4	16949.1	7861.74			5	4	19642.3	11422.2		5	4	19753.1	10548.9		5	4	16282.7	7435.32			5	4	20184.3	12726		5	4	21621.3	12272		5	4	17571.2	7897.36
				6	5	20666.5	12589.5		6	5	19102.6	10771.9		6	5	17005.9	7953.14			6	5	19261.9	11055.4		6	5	18862.4	10379.4		6	5	16228	7460.8			6	5	19972.4	11785		6	5	20533.4	11668		6	5	17329.3	7959.96
				7	6	21483.7	12255.6		7	6	19926.1	10996		7	6	17294.3	8028.09			7	6	18709.9	10856.1		7	6	18285.1	10340.9		7	6	16190.7	7392.94			7	6	20359.8	11662.4		7	6	20155.9	11199.8		7	6	17452.6	8005.08
				8	7	20381	11364.9		8	7	19841	11772		8	7	17340.8	7932.09			8	7	18311.2	10430.2		8	7	18497.5	10181.9		8	7	16535.3	7501.01			8	7	20705.8	11643.5		8	7	19995.6	11298.9		8	7	17494.8	7924.64
				9	8	19269.4	10722		9	8	18810.3	12627		9	8	17169.2	7878.78			9	8	17767.5	9892.02		9	8	18883.4	10466.4		9	8	16272.4	7382.42			9	8	20531.8	11446.7		9	8	20431.1	11486.9		9	8	17373.8	7899.2
				10	9	19992.9	10927.5		10	9	19333.1	11710.5		10	9	17154.4	7852.36			10	9	17902	10712.9		10	9	18287.4	10519.7		10	9	16353.7	7390.45			10	9	19956.5	11641.5		10	9	20985.7	11497.8		10	9	17261.2	8029.92
				11	10	20340.6	11241.7		11	10	19923.1	10863.5		11	10	17070.6	7885.31			11	10	18547.5	10980.7		11	10	17408.1	9891.76		11	10	16177.9	7447.22			11	10	19163.2	12061		11	10	21389.2	11747.6		11	10	17450	7905.3
				12	11	20097.4	11272.3		12	11	19614.2	10843.2		12	11	17114	7946.45			12	11	18607.9	10919.9		12	11	16949.6	9148.6		12	11	16127.1	7463.82			12	11	19148.4	11206.8		12	11	22780.2	11820.9		12	11	17452	7865.51
				13	12	19984.6	11559.6		13	12	20870.7	11367.1		13	12	17302.7	7997.49			13	12	18486.9	10678.4		13	12	16708.5	8664.8		13	12	16438.2	7567.72			13	12	18838.9	10817.3		13	12	21332.1	11958.8		13	12	17421.7	7965.05
				14	13	20602.6	11972.1		14	13	19671.1	11108.7		14	13	17240.7	7970.64			14	13	17996.3	9657.91		14	13	16818.2	8919.85		14	13	16312.4	7345.69			14	13	18655.7	11558.4		14	13	20447.4	11395.9		14	13	17518.6	8070.19
				15	14	20246.2	12339.7		15	14	18376	10864.2		15	14	17210.8	7915.16			15	14	18918.7	10605		15	14	16999.7	9577.8		15	14	16102.4	7434.55			15	14	18618.9	11757.6		15	14	20050.4	11439.7		15	14	17650	8061.27
				16	15	19569.3	11856.7		16	15	18300.8	10602.5		16	15	17290.9	7992.24			16	15	19497.3	12140.7		16	15	16766.2	9580.75		16	15	16289.4	7491.57			16	15	18545	12163.2		16	15	19729.3	11210.9		16	15	17484.3	8038.96
				17	16	19584.7	11371.2		17	16	18211.3	10660.2		17	16	17280.7	7954.85			17	16	19095.7	12170		17	16	16632.3	9193.01		17	16	16108.3	7340			17	16	18737.4	12217.2		17	16	19915.5	11145.7		17	16	17167.6	7974.45
				18	17	19033.6	11282.8		18	17	18182.9	10487.8		18	17	17306.3	8020.7			18	17	18861.4	11556.6		18	17	16435.6	9034.12		18	17	16234.3	7421.12			18	17	18963.8	11482.4		18	17	19573.3	11025.9		18	17	17290.1	7954.9
				19	18	18392	10487.9		19	18	18522.9	10516.9		19	18	17068.1	7890.28			19	18	18472.8	11172.8		19	18	16448	9543.79		19	18	16536.4	7544.36			19	18	19547.2	10916		19	18	19846.3	11167.5		19	18	17372.5	7953.62
				20	19	19013.1	9927.13		20	19	19058.7	11146.3		20	19	17085.4	7846.08			20	19	18789.6	10998.2		20	19	16583.5	10387.7		20	19	16462.4	7529.94			20	19	19809.4	11233.1		20	19	19661.9	11441.5		20	19	17495.5	7880.01
				21	20	19423.3	10040.8		21	20	19808.7	11782		21	20	17151.7	8000.69			21	20	18499.2	10370.4		21	20	16681.7	9995.49		21	20	16377.9	7373.35			21	20	19079.1	10934.1		21	20	20264.7	12063.4		21	20	17255.8	7855.99
				22	21	18602.5	9972.72		22	21	20762.8	12162		22	21	17253.5	8130.55			22	21	18171.2	10162.3		22	21	16689.3	9822.43		22	21	16324.3	7380.92			22	21	19243.3	10540.6							22	21	17120.3	7899.38
				23	22	18680.8	9962.65		23	22	19004.6	11227.1		23	22	17307.1	7996.99			23	22	18153.4	10301		23	22	17503.6	9981.01		23	22	16464.2	7342.92			23	22	19282.9	10624							23	22	17318	7932.59
				24	23	18819.8	10408.2		24	23	20728.3	11606.6		24	23	17133	8013.91			24	23	18197.3	10508.2		24	23	18204.5	10533.8		24	23	16317.3	7407.03			24	23	19315.8	11070.3							24	23	17306.5	8088.55
				25	24	18917	10726.9		25	24	21161	11365.4		25	24	17077.1	8018.26			25	24	18377.1	10588		25	24	18664.2	11075.6		25	24	16273.1	7384.55			25	24	19617.4	11526.7							25	24	17167.4	8107.31
				26	25	19108.3	11252.7		26	25	20291.5	10796.9		26	25	17040.6	8038.35			26	25	18445.3	10584.8		26	25	18937.8	11402.5		26	25	16256.1	7462.26													26	25	17470.8	8063.32
				27	26	18749.1	10967.8							27	26	17229.2	7812.96			27	26	18333.6	10365.6		27	26	19070.3	11629.7		27	26	16245.4	7499.22													27	26	17565.4	7895.76
				28	27	18332.5	10146.2							28	27	17511.8	7821.51			28	27	18352.1	10294.6		28	27	20177.1	12010.3		28	27	16276.5	7527.65													28	27	17486.9	7911.98
				29	28	17838.7	9651.83							29	28	17194	7940.66			29	28	18948.2	11088.2		29	28	19840.1	11940.4		29	28	16435.1	7548.99													29	28	17346.6	8096.46
														30	29	17085.2	7976.97			30	29	18968.7	11726.6		30	29	20056.3	11761.2		30	29	16363.8	7427.6													30	29	17158.1	7940.69
														31	30	17178.9	7980.45			31	30	18251.2	11054.2		31	30	20331.4	11417.8		31	30	16219.9	7479.68													31	30	17275.9	8007.44
														32	31	16986	7824.84								32	31	20385.2	10948.4		32	31	16490.8	7524.29													32	31	17353.2	8058.27
														33	32	17208.9	7880.34								33	32	18913.3	10505.8		33	32	16441.7	7377.11													33	32	17346.8	8053.2
														34	33	17399.2	8023.99													34	33	16294.5	7334.79													34	33	17497.8	8053.24
														35	34	17331.7	8008.57													35	34	15905.1	7379.57													35	34	17569.8	7884.42
														36	35	17185.2	7825.62													36	35	15991.6	7324.76													36	35	17366.5	7853.4
														37	36	17134.5	7819.1													37	36	16232.1	7406.97													37	36	17387.3	7798.32
														38	37	16941.3	7931.45													38	37	15976.6	7367.45													38	37	17189.9	7955.54
														39	38	17111.3	7892.28													39	38	16182	7299.39													39	38	17376	8008.66
														40	39	16929.6	7975.73													40	39	16344.1	7515.63													40	39	17585	8005.35
														41	40	17126.9	8003.34													41	40	16210.3	7406.77
																														42	41	16142.4	7452.01
																														43	42	16165.7	7471.04
																														44	43	16149.6	7486.66
																														45	44	16372.7	7651.35
																														46	45	16070.1	7277.79
																														47	46	16182.8	7376.96

## Sheet: A_Mlp1-Nup159
					181101_Run8_Nu170_Mlp1_refNup159__1_MMStack_Pos22cell2asym_age22																181101_Run8_Nu170_Mlp1_refNup159__1_MMStack_Pos22cell5asym_age20																181101_Run8_Nu170_Mlp1_refNup159__1_MMStack_Pos23cell2asym_age20
		SEM	ttest
cMother	0.241807	0.0805627	0.00586408		correlation	-0.149629															correlation	-0.046961															correlation	-0.50912
cDaughter	0.501721	0.0591751									0.350987																-0.143448																0.486755
cRandom	0.198922															0.153322																0.104529																0.268863
Age	20					22																20																20
n	26				Intensity	17644.7	11982.3				19153.7	12286.2				16185.1	7599.64				Intensity	17156.9	11938.7				17429	11049.1				15534.5	7414.52				Intensity	17194	11274.8				17397.7	10782.7				15800	7560.12
					Bgcorrected	1459.59	4382.69				2968.61	4686.56									Bgcorrected	1622.46	4524.15				1894.54	3634.53									Bgcorrected	1393.94	3714.64				1597.71	3222.61
										ratioDM	2.03386															ratioDM	1.16769															ratioDM	1.14618
												1.06933																0.803363																0.867542
				M					D					BG						M					D					BG						M					D					BG
				1	0	17628	12363		1	0	18587	12167		1	0	16385	7622			1	0	16995	11987		1	0	18052	10940		1	0	15436	7594			1	0	19434	9695		1	0	19842	10806		1	0	15744	7552
				2	1	17329.1	12586.5		2	1	19565.5	12545.3		2	1	16294.2	7554.67			2	1	16970	12023.4		2	1	19374	10722		2	1	15619.9	7430.48			2	1	18163.1	9798.8		2	1	18423	11415		2	1	15868.9	7446.18
				3	2	17793.3	11836.9		3	2	19757.1	12646.2		3	2	16035.5	7582.32			3	2	16949.1	11446.1		3	2	17442	10543		3	2	15474.2	7571.66			3	2	17946.7	9907.55		3	2	17710	12265		3	2	15833.4	7468.49
				4	3	18770.3	12031.2		4	3	18828	12363.9		4	3	16108.9	7695.74			4	3	17637.3	11339.5		4	3	17379.1	10318		4	3	15392.8	7512.9			4	3	18451.3	10186		4	3	18705	11837		4	3	15622	7775.52
				5	4	18556.1	11953.8		5	4	18305.6	12199.3		5	4	16175.8	7781.62			5	4	18285.5	11466.3		5	4	17486.9	9879.99		5	4	15488.7	7434.15			5	4	17915.1	10151.3		5	4	17570	11025		5	4	15678.1	7421.35
				6	5	18371.5	11706.1		6	5	17988.9	11950.6		6	5	16217	7757.54			6	5	17964.3	11583		6	5	16928	9926.47		6	5	15652.1	7403.15			6	5	17490.6	10333.4		6	5	18455	11064		6	5	15768.4	7484.89
				7	6	17871.7	11711.8		7	6	18703.1	13064.3		7	6	16017.8	7710			7	6	17722.4	11574.6		7	6	16943	10116.8		7	6	15525	7367.26			7	6	17742.7	10906.8		7	6	18351	10744		7	6	15888.1	7565.35
				8	7	18134.7	11887.1		8	7	19541.9	13659.2		8	7	16087	7611.62			8	7	18014.5	11515.3		8	7	17606.3	10248.1		8	7	15530.6	7482.88			8	7	17410.1	11711.3		8	7	17981.6	10685.9		8	7	15759.7	7574.07
				9	8	18645.8	11548.4		9	8	20029	12801		9	8	16170.3	7644.94			9	8	18357.5	11292.7		9	8	17487	10668.2		9	8	15628.1	7597.85			9	8	17180.8	11966.6		9	8	17825.6	10772.5		9	8	15821.3	7604
				10	9	18564.3	11266		10	9	18682.4	12104.1		10	9	16316	7660.57			10	9	17799.8	10974.7		10	9	17201.5	10823.2		10	9	15657.4	7590.88			10	9	17143	12010.4		10	9	17577.8	10898.7		10	9	15818.4	7471.41
				11	10	18215.8	11069.7		11	10	18683.1	11878.4		11	10	16259.8	7815.51			11	10	17259.8	10915.5		11	10	17427.9	10764		11	10	15552.6	7709.22			11	10	17179.5	12141.9		11	10	17413.1	11692.7		11	10	15588.2	7473.81
				12	11	18065.9	11213.9		12	11	19145.3	11971.1		12	11	16297	7605.98			12	11	17170	10942.1		12	11	17604.8	10863.9		12	11	15413.3	7710.48			12	11	17114.6	11551.7		12	11	17248.1	11853.9		12	11	15807.3	7459.59
				13	12	17594	11239		13	12	18547.1	12110.4		13	12	16257.2	7667.53			13	12	16881.1	10884.7		13	12	17893.5	10335.1		13	12	15676.2	7559.8			13	12	16483.7	12075.8		13	12	17087.4	11564.1		13	12	15920.6	7471.48
				14	13	17523.6	11059.9		14	13	17931	11272		14	13	16082.8	7695.16			14	13	16709.6	11409.1		14	13	17153.2	10640.1		14	13	15653.3	7484.48			14	13	16326.8	11510		14	13	17576.6	11222.1		14	13	15837.8	7341.74
				15	14	17718	11000.1		15	14	19514.6	12570.2		15	14	16094.6	7760.39			15	14	16561.8	12068.5		15	14	16276.1	11772.3		15	14	15473.4	7635.41			15	14	16324.5	11342.4		15	14	16975.5	10459.8		15	14	15614.5	7560.95
				16	15	17838.2	10788.6		16	15	20745.6	12800.7		16	15	16322.5	7706.41			16	15	16905.4	11689.2		16	15	16487.1	12936		16	15	15566.3	7424.93			16	15	16424.5	10882.8		16	15	17515.5	11287.9		16	15	15691.1	7443.64
				17	16	17695.8	10817.9		17	16	20577.3	11938.5		17	16	16295.9	7577.78			17	16	17207.3	11156.3		17	16	16669.5	11741.9		17	16	15494	7399.14			17	16	17256.1	11663.4		17	16	17801.6	10453.6		17	16	15819.2	7407.87
				18	17	17941.1	10779.5		18	17	19963.6	11636.7		18	17	16144.8	7541.82			18	17	17182.3	10878.1		18	17	16992.4	10850.9		18	17	15405.6	7376.36			18	17	17180.9	13871.3		18	17	16929.1	9801.75		18	17	15895.6	7268.19
				19	18	17853.6	10949.5		19	18	18809.5	12056.3		19	18	15994.2	7466.87			19	18	16988.1	11452.7		19	18	17561.5	11852.8		19	18	15474.2	7436.58			19	18	16556.4	12767.3		19	18	17103.3	9850.87		19	18	15805.8	7447.68
				20	19	17672.9	11082		20	19	18995.2	12565.2		20	19	16237.3	7490.66			20	19	16245.6	11524.1		20	19	18007.8	12132.5		20	19	15584	7254.15			20	19	16455.5	11252.6		20	19	16864.4	10047.3		20	19	15680.5	7518.16
				21	20	17477.3	10783.2		21	20	19326.6	11709.9		21	20	15855.6	7543.91			21	20	15922	10340		21	20	17994.6	12130.1		21	20	15603.2	7377.03			21	20	16656	10590.6		21	20	16450.2	10154.3		21	20	15596.3	7374.96
				22	21	17520.4	10567							22	21	15955.6	7417.17			22	21	16466	10819.4		22	21	17193.7	12208.2		22	21	15593.7	7418.86			22	21	17244.6	10765.6		22	21	16605.6	9924.81		22	21	15568.7	7400.98
				23	22	17832.7	10555.8							23	22	15972.7	7520.03			23	22	16427.8	11595		23	22	17264.2	12634.2		23	22	15483	7239.11			23	22	17083.5	11347		23	22	17079	10425.6		23	22	15614.8	7474.04
				24	23	17327.1	9970.13							24	23	16013.1	7577.76			24	23	16397.7	12152.1		24	23	17465.9	12582.9		24	23	15520	7183.43			24	23	16817.3	11587		24	23	17137	10690.4		24	23	15674.6	7488.2
				25	24	17468.5	10568.3							25	24	16188.4	7687.9			25	24	16295.5	12999.2		25	24	17416.8	11718.5		25	24	15348.8	7408.79			25	24	16727.7	11770.3		25	24	17279.4	11136.2		25	24	15569.8	7465.12
				26	25	17671.5	11158.5							26	25	16157.3	7585.81			26	25	16405	12266		26	25	17730.8	11055.9		26	25	15472.9	7482.11			26	25	17024.5	12692.6		26	25	16785	11534.4		26	25	15706.6	7508.6
				27	26	17622.3	11491.5							27	26	16317.2	7561.61			27	26	16576.2	14771.4		27	26	18316.5	10671.4		27	26	15454	7394.07			27	26	16993.8	11250.8		27	26	16277.4	10521		27	26	15766.9	7471.32
				28	27	17350	11394.5							28	27	16381.4	7534.58			28	27	16752.4	14870		28	27	17526.6	10701		28	27	15415.4	7275.98			28	27	16703.6	9963		28	27	16295.8	9761.13		28	27	15729.4	7350.81
				29	28	17321.2	11241.6							29	28	16124	7615.96			29	28	17162.2	15167.5		29	28	16832.1	10641		29	28	15499.9	7278.85								29	28	16504.2	9642.48		29	28	15353.4	7347.67
				30	29	17187.5	11470.9							30	29	15987.3	7479.78			30	29	17516.5	15222.4		30	29	17183.8	10266.8		30	29	15553.3	7308.45								30	29	16656.4	9942.43		30	29	15569.2	7434.72
				31	30	17284.8	11392.1							31	30	16181.5	7494.78			31	30	17393.6	13629.7		31	30	17400.6	9835.43		31	30	15409.6	7282.71								31	30	16770.1	10304.5		31	30	15569.4	7496.33
				32	31	17487.5	11302.8							32	31	16236.6	7540.55			32	31	18069.1	12909.1							32	31	15271.2	7365.06								32	31	17284.3	10756.6		32	31	15637.9	7505.7
				33	32	17291.1	12230.9							33	32	16179.1	7586.94			33	32	18092	12205.7							33	32	15882.9	7249.58								33	32	18045.1	11288.8		33	32	15627.9	7563.09
				34	33	17360.8	12559							34	33	16024.3	7525.77			34	33	18131.3	11452.6							34	33	15516.8	7403.91													34	33	15471.1	7608.54
				1	0	16742	11592							35	34	16088.5	7450.47			35	34	17711.2	11072.7							35	34	15800.7	7562.68													35	34	15559.4	7561.79
				2	1	16768.3	11663.6							36	35	16088.6	7667.69			36	35	17095.9	10940.1							36	35	15461.5	7446.11													36	35	15765.5	7609.39
				3	2	17165.6	12937.2							37	36	16307.6	7671.08			37	36	16983.9	11370.8							37	36	15414.4	7362.28													37	36	15700	7533.98
				4	3	17388.9	14223.8							38	37	16107.8	7628.46			38	37	16995.4	11989							38	37	15427.8	7236.39													38	37	15753.3	7388.71
				5	4	17452.9	15601.2							39	38	16150.7	7599.35			39	38	16920.4	11712.5							39	38	15496.5	7181.56													39	38	15837.5	7624.54
				6	5	17082	13989							40	39	16100.6	7500.25													40	39	15475.4	7211.48													40	39	16028.9	7490.84
				7	6	17336.2	14731.8							41	40	16226.7	7524.37													41	40	15511.7	7235.8													41	40	16036.1	7509.95
				8	7	17352.9	12982.4							42	41	16412	7552.37													42	41	15494.7	7363.06													42	41	15888.2	7620.3
				9	8	17386.9	11809.6							43	42	16188.1	7519.23													43	42	15485.5	7456.69													43	42	15934.7	7716.91
				10	9	17468.2	12142.4							44	43	16096.4	7379.18													44	43	15445.2	7254.69													44	43	15890.6	7580.23
				11	10	17298	14005.3							45	44	16028.9	7354.26													45	44	15647.3	7360.48													45	44	15669.9	7563.63
				12	11	18783.3	13448.5							46	45	16174.3	7440.74													46	45	15460.7	7422.29													46	45	16136.1	7760.92
				13	12	17955	13933							47	46	16261	7474.25													47	46	15671.4	7331.21													47	46	15819.2	7628.24
				14	13	17731.3	13082							48	47	16246.5	7528.75													48	47	15687.4	7422.22													48	47	15881.8	7642.46
				15	14	17539.9	13154.1							49	48	16292	7488.91													49	48	15423.2	7549.71													49	48	15976.6	7715.7
				16	15	17337.8	13370.4							50	49	16208.3	7660.64													50	49	15535.2	7393.45													50	49	15795	7741.91
				17	16	17102.3	12855.7							51	50	16156.7	7746.52													51	50	15545.5	7415.64													51	50	15961.7	7354.08
														52	51	16253.4	7703.22													52	51	15524.3	7524.13													52	51	15959.7	7733.09
														53	52	16035.8	7672.61													53	52	15529.2	7432.52													53	52	15786.9	7710.11
														54	53	16232.2	7662													54	53	15474.9	7447.46													54	53	15938.5	7749.45
														55	54	16419	7691.92													55	54	15807.1	7489.07													55	54	15877.1	7684.89
														56	55	16100.9	7398.63													56	55	15518.4	7405.45													56	55	15935.8	7481.63
														57	56	16171.4	7583.53													57	56	15905	7479.69													57	56	15888.4	7722.39
														58	57	16145.6	7601.57																													58	57	15883.7	7808.64
														59	58	16149.9	7576.03																													59	58	15692.6	7874.79
														60	59	16176.4	7527																													60	59	15881.3	7707.63
														61	60	16280.2	7384.08																													61	60	15776	7753.85
														62	61	16221.2	7609.1																													62	61	15878.3	7695.84
														63	62	16224.5	7463.04																													63	62	16204.2	7507.22
														64	63	16159.3	7546.45																													64	63	16096.8	7586.7
														65	64	16085.5	7599.61																													65	64	15890.9	7629.47
														66	65	16289.2	7616.61																													66	65	15902	7598.97
														67	66	16261.9	7494.64																													67	66	15943.9	7669.06
														68	67	16270	7596.28																													68	67	15839.3	7595.74
														69	68	16122.8	7516.29																													69	68	15696.5	7431.39
														70	69	16356.3	7536.55																													70	69	15737.5	7446.92
														71	70	16147.3	7633.84																													71	70	15904.5	7518.29
														72	71	16252.2	7667.52																													72	71	15923.5	7650.55
														73	72	15964.6	7590.79																													73	72	15910.7	7421.3
														74	73	16285.8	7779.09																													74	73	15727.4	7575.67
														75	74	16210.1	7433.14																													75	74	15827	7711.22
														76	75	16247.2	7601.07																													76	75	15880.8	7636.1
														77	76	16091.9	7606.28																													77	76	15639.2	7404.46
														78	77	16515.9	7496.2																													78	77	15826.1	7592.34
														79	78	16081.1	7394.7																													79	78	15751.8	7466.72
														80	79	16204.2	7618.45																													80	79	15886.8	7552.35
														81	80	16431.9	7682.18																													81	80	15946	7392.33
														82	81	16145.5	7729.46																													82	81	15966	7717.27
														83	82	16189.1	7710.17																													83	82	15809.5	7580.9
														84	83	16280.4	7637.82																													84	83	15936.2	7551.27
														85	84	16289.4	7667.89																													85	84	16027	7616.42
														86	85	16146.8	7684.02																													86	85	15822.7	7702.49
														87	86	15947.9	7546.85																													87	86	15814.1	7597.09
														88	87	16044.6	7497.46																													88	87	15834.6	7563.16
														89	88	16162.1	7586.12																													89	88	15709.1	7554.77
														90	89	16204.9	7646.76																													90	89	15806.7	7730.92
														91	90	16248.7	7531.73																													91	90	15841.3	7631.62
														92	91	16202.1	7553.18																													92	91	15779.9	7527.83
														93	92	16317.4	7619.5																													93	92	15805.1	7536.6
														94	93	16291.5	7606.18																													94	93	15619.8	7424.28
														95	94	16123.1	7595.57																													95	94	15938.2	7702.33
														96	95	16211.6	7579.07																													96	95	15650.6	7611.24
														97	96	16206.4	7615.13																													97	96	15588.6	7594.82
														98	97	16318.4	7492.34																													98	97	15769.4	7585.6
														99	98	16276.9	7516.19																													99	98	15864.3	7708.59
														100	99	15940.5	7727.19																													100	99	15612.7	7604.24
														101	100	16051.4	7563.69																													101	100	15803.7	7527.85
														102	101	16004.3	7608.55																													102	101	16077.9	7478.77
														103	102	16215	7602.28																													103	102	15841.6	7555.68
														104	103	16038.7	7603.93																													104	103	15666.9	7522.17
														105	104	16221.7	7607.79																													105	104	15830.2	7587.28
														106	105	16178.9	7553.4
														107	106	16102	7729.77
														108	107	16021.5	7615.08
														109	108	16122.3	7503.65
														110	109	16249.7	7618.55
														111	110	16097.4	7463.69
														112	111	16037.6	7562.91
														113	112	16226.5	7721.75
														114	113	16209.1	7683.08
														115	114	16072.7	7646.84
														116	115	16213.3	7823.28
														117	116	16248.4	7624.14
														118	117	16032.1	7690.76
														119	118	16265.3	7640.11
														120	119	16231.9	7725.19
														121	120	16363	7719.23
														122	121	16251.5	7822.12
														123	122	16502.4	7704.54
														124	123	16541.8	7538.76
														125	124	16085.2	7732.18
														126	125	16297.9	7816.71

## Sheet: Y_Nup170_N159
					181101_Run8_Nu170_Mlp1_refNup159__1_MMStack_Pos3cell1asym_age2																181101_Run8_Nu170_Mlp1_refNup159__1_MMStack_Pos3cell2asym_age1																181101_Run8_Nu170_Mlp1_refNup159__1_MMStack_Pos3cell3asym_age3
		SEM	ttest
cMother	0.807045	0.0176128	0.355086		correlation	0.869003															correlation	0.797025															correlation	0.838552
cDaughter	0.77115	0.0328582									0.570555																0.944778																0.887501
cRandom	0.199977															0.171313																0.250091																0.190423
Age	2					2																1																3
n	27				Intensity	17129.6	10042.8				16870.7	9774.74				15400.5	7529.33				Intensity	21656.1	13182.3				21136.3	12670.6				16983.3	8130.87				Intensity	19956.8	11048.5				19397	10821.3				17107.5	8021.75
					Bgcorrected	1729.06	2513.46				1470.22	2245.41									Bgcorrected	4672.78	5051.41				4153.04	4539.68									Bgcorrected	2849.3	3026.75				2289.54	2799.56
										ratioDM	0.850297															ratioDM	0.888772															ratioDM	0.803542
												0.893356																0.898697																0.924938
				M					D					BG						M					D					BG						M					D					BG
				1	0	16476	9890		1	0	16844	9865		1	0	15358	7549			1	0	22477	15221		1	0	22029	13508		1	0	17085	8246			1	0	19900	11149		1	0	19406	10320		1	0	17238	7949
				2	1	17065.9	10035		2	1	16738.5	10068.8		2	1	15497.6	7536.89			2	1	22072.6	14422.7		2	1	21782	13263		2	1	16904.6	8194.6			2	1	20559.8	11249		2	1	19196.5	10516.3		2	1	17101.4	8064.85
				3	2	16893.3	9979.7		3	2	16739.7	10022.5		3	2	15579	7417.67			3	2	21254.9	13507.9		3	2	22570	13662		3	2	16930.8	8036.75			3	2	20250.8	11714.3		3	2	19358	10711.1		3	2	17154.8	8168.48
				4	3	16078.4	9949.17		4	3	16625.4	9871.5		4	3	15349.6	7687.96			4	3	21101.9	13122.5		4	3	21547.3	12821.2		4	3	17067.1	8068.65			4	3	20580.3	12407.6		4	3	19394.7	10930.5		4	3	17122.1	8157.13
				5	4	16326.2	9422.83		5	4	16436.4	10088.1		5	4	15387.6	7512.15			5	4	21864.5	13265.7		5	4	21190.3	12490.3		5	4	17049.3	8110.02			5	4	20818.8	12242.5		5	4	20063.8	11457.5		5	4	17112.9	7994.87
				6	5	16377.2	9672.56		6	5	16750.2	10028.7		6	5	15501.9	7670.05			6	5	21197.6	12660.4		6	5	20831.7	12381		6	5	17159.3	8112.73			6	5	20581	11587.8		6	5	20598.8	11566.2		6	5	17135.1	8046.47
				7	6	17241.6	10013.5		7	6	17018.8	10536.6		7	6	15337.1	7658.52			7	6	21210.3	12147.2		7	6	20550.2	12043.2		7	6	16987.8	8104.12			7	6	20705.6	11502.5		7	6	20122.9	11441.6		7	6	17019.3	7899.53
				8	7	17361	9607.56		8	7	17168.3	10619.6		8	7	15391.1	7559.21			8	7	20985.6	12189.4		8	7	20575.6	12066.5		8	7	16934.6	8207.67			8	7	20710.3	12118		8	7	20190.5	11652.2		8	7	17072.8	7928.81
				9	8	16589.3	9191.6		9	8	16983.2	10357.5		9	8	15316.4	7559.38			9	8	21039.9	12238.8		9	8	20273.5	12022.2		9	8	16923.5	8271.06			9	8	20886.5	12481.1		9	8	20894.2	12143.8		9	8	17111.4	7948.75
				10	9	16651.7	9451.92		10	9	16774.3	10078		10	9	15342.2	7545.16			10	9	20879.7	12009.5		10	9	19987.9	11507.9		10	9	17068.4	8291.57			10	9	20585.4	12178.2		10	9	20480.4	11605.6		10	9	17206.7	7950.77
				11	10	16923.7	9507.24		11	10	16869.5	9592.19		11	10	15283.5	7622.73			11	10	21117.5	12349.3		11	10	20009.8	11669.7		11	10	16986.9	8225.96			11	10	20571.6	11458.7		11	10	20594.6	11514.9		11	10	17367.2	8066.71
				12	11	17125.3	9600.59		12	11	16753.8	9233.36		12	11	15339	7501.22			12	11	21897.5	12924.8		12	11	20935.6	12419.8		12	11	17012.7	7987.91			12	11	20125.6	10789.3		12	11	20655.7	11983		12	11	17054	8014.31
				13	12	17283.2	9823.16		13	12	16903.8	8987.23		13	12	15336.6	7472.94			13	12	21724.5	12864.3		13	12	21544.7	13133.9		13	12	16840.8	8069.69			13	12	20361.6	11066		13	12	20741.6	12299.2		13	12	17257.4	8030.58
				14	13	17356.6	10120.8		14	13	17017.1	9113.21		14	13	15599.4	7372.56			14	13	21380.2	13024.4		14	13	21668.4	13533		14	13	17188.6	8259.5			14	13	20377.6	11493.8		14	13	20206.5	12683.1		14	13	17254.7	8153.12
				15	14	17795.4	11122.1		15	14	16725.8	9594.28		15	14	15561.7	7463.62			15	14	21416.2	13494.8		15	14	21785.9	13448.6		15	14	17228.5	8087.34			15	14	20294.5	11241.8		15	14	19486.5	11984.6		15	14	17028	8245
				16	15	18404.9	12290.5		16	15	17033.3	10024.9		16	15	15229.1	7419.66			16	15	22127.7	14031.4		16	15	21200.2	13168.6		16	15	16967.2	8089.57			16	15	19919	10644.4		16	15	19222.8	11540.8		16	15	17066.5	8041
				17	16	18586.8	12079.6		17	16	16962.4	9873.41		17	16	15167.2	7492.01			17	16	21992.1	14171		17	16	20696	12124		17	16	16966.9	8161.96			17	16	19516.1	10495.4		17	16	19102.4	11090.8		17	16	16988.6	7990.96
				18	17	18361	11655.5		18	17	16421.5	9658.06		18	17	15131.1	7548.61			18	17	22122.1	13419.5		18	17	20435.3	11777.4		18	17	16905.7	8072.18			18	17	19290.8	10196.9		18	17	18915.8	10462.6		18	17	16974.4	8018.25
				19	18	18366.2	11234.8		19	18	16462.5	9077.4		19	18	15495.9	7538.62			19	18	22971.7	14069		19	18	20753.8	12276.6		19	18	16873.2	8066.21			19	18	19276.2	9640.79		19	18	18500.4	9898.8		19	18	16845.4	7943.23
				20	19	17535.4	10514		20	19	16577.6	8881.56		20	19	15512.7	7606.1			20	19	22439	13810.6		20	19	21146.1	12275.1		20	19	17026	8233.39			20	19	19342.8	9597.26		20	19	17933.6	9577.81		20	19	17069.9	8131.8
				21	20	18532.3	10972.4		21	20	16776.5	9172.15		21	20	15291.1	7490.68			21	20	22297.3	13506.5		21	20	21262.4	12759.6		21	20	17254.1	8233.88			21	20	19628.7	9751.97		21	20	18327	9780.52		21	20	17165.8	8058.84
				22	21	18342.1	10699.7		22	21	17170.6	9583.7		22	21	15254.5	7538.07			22	21	21597.2	13111.1		22	21	21543.6	13318.7		22	21	16995.6	8196.1			22	21	19989.8	10433.2		22	21	18348.8	10025		22	21	17062.4	7955.73
				23	22	17684.9	9991.45		23	22	17651	10209.6		23	22	15568.8	7549.5			23	22	20963	12268.4		23	22	21816.5	13752.4		23	22	16959.2	8029.38			23	22	19226.8	11023.9		23	22	18668.6	10195.3		23	22	17062.8	8039.36
				24	23	17247.7	9790.69		24	23	17498.2	10482.5		24	23	15553.7	7679.79			24	23	20943.9	12541.8							24	23	16912	8151.98			24	23	18713.9	9815.41		24	23	19141.3	10043.7		24	23	17096.4	8058.4
				25	24	17153.7	9565.23		25	24	17313.6	10210.1		25	24	15477.9	7659.48			25	24	21967.4	13417.5							25	24	17166.7	8116.67			25	24	18648.3	9284.16		25	24	19005.1	10094.6		25	24	17104.2	8122.46
				26	25	17224.2	9967.33		26	25	17421.2	9931.78		26	25	15334.5	7625.24			26	25	21731.7	11466.5							26	25	17007.2	8065.11			26	25	18683.3	9324.29		26	25	18733.5	10103.5		26	25	17050.6	8113.88
				27	26	17035.2	9857.82		27	26	17276.8	10139.8		27	26	15471.9	7502.74			27	26	20894.8	11226.2							27	26	16945.9	8092.24			27	26	18724	10025.5		27	26	18734.8	9980.48		27	26	17273.2	8106.45
				28	27	16563.3	9755.44		28	27	16788	10046.3		28	27	15736.3	7603.74			28	27	21043.1	12383.6							28	27	16987	8079.59			28	27	19043.6	10676.7		28	27	18675	9853.24		28	27	17143.6	7857.78
				29	28	16392.8	9820.92		29	28	16257.2	9290.75		29	28	15757.8	7599.91			29	28	22200.4	13873.2							29	28	17334.4	8097.28			29	28	19092.8	10652.2		29	28	18488.2	9654.76		29	28	17127.6	8038.65
				30	29	16573.4	9897.84		30	29	16163.4	8603.69		30	29	15578.5	7539.06			30	29	21960.5	14311.7							30	29	16984.2	8092.95			30	29	18839.6	10801.7		30	29	18721.9	9527.52		30	29	17180.8	7990.01
				31	30	16356	9564.64							31	30	15623.4	7627.02			31	30	22471.8	15212							31	30	17090.5	8041.64			31	30	18916.4	10861.3							31	30	16895.3	7936.39
				32	31	15799.6	8543.68							32	31	15592.5	7582.71			32	31	22323.6	14363.7							32	31	16871.4	8109.72			32	31	19339	10561.2							32	31	16992.2	8016.01
				33	32	15572	7822.76							33	32	15446.4	7598.68			33	32	20983.5	12388.9							33	32	16692.1	8086.08			33	32	19993.7	11203.8							33	32	17328.9	8128.19
														34	33	14829.6	7621.56													34	33	16757	8108.34			34	33	20521.1	11225							34	33	17008.6	8113.95
														35	34	15592.2	7527.92													35	34	16938.2	7964.55			35	34	20313.8	11678.8							35	34	17116.3	8067.55
														36	35	15506.1	7519.14													36	35	16933.6	8056.1			36	35	20524.4	12457							36	35	16869.6	7814.79
														37	36	15337.4	7495.48													37	36	16666.3	8100.13			37	36	21177	12319.4							37	36	17092.2	7978.17
														38	37	15716.9	7499.15													38	37	16965.8	8191.52			38	37	22326.1	12492.8							38	37	17050.3	7967.71
														39	38	15233.4	7619.29													39	38	16905.2	8124.27													39	38	16937	8034.12
														40	39	15219.4	7384.61													40	39	17049.6	8130.5													40	39	17000.1	8097.82
														41	40	15390	7576.67													41	40	16928.2	8180.28													41	40	17169.9	8057.56
														42	41	15532.1	7479.04													42	41	17024.6	8227.15													42	41	17328.1	8095.03
														43	42	15348.6	7695.74													43	42	17143.7	8080.58													43	42	17379.6	7922.75
														44	43	15598.8	7550.28													44	43	17105.3	8077.89													44	43	17066.7	7715.59
														45	44	15463.9	7503.07													45	44	17096.7	8247.77													45	44	17158.1	7964.08
														46	45	15320	7620.44													46	45	17140.3	7983.39													46	45	17075.4	8043.32
														47	46	15415.7	7478.17													47	46	17096.4	8102.54													47	46	17051.4	7961.04
														48	47	15433.6	7508.14													48	47	17100	8082.89													48	47	16923.8	8033.1
														49	48	15498.7	7529.21													49	48	16957.1	8066.22													49	48	17164.4	8012.4
														50	49	15429.9	7605.63													50	49	16982.7	8293.39													50	49	17291.4	8103.64
														51	50	15316	7504.84													51	50	16938.9	8346.01													51	50	17145.4	8063.21
														52	51	15266.7	7545.78													52	51	17126.5	8236.02													52	51	16942.7	8057.86
														53	52	15523.9	7563.97													53	52	17067.7	8248.99													53	52	17149.8	8062.64
														54	53	15442.5	7547.55													54	53	17092.2	8162.81													54	53	17217.4	7842.19
														55	54	15419.2	7737.04													55	54	17139.4	8259.34
														56	55	15502.3	7556.93													56	55	17095.3	8209.9
														57	56	15269.8	7491.15													57	56	17064.2	8333.44
														58	57	15333.2	7475.61													58	57	16854	8197.61
														59	58	15279	7397.79													59	58	17017.9	8047.8
														60	59	15305.7	7481.19													60	59	17051.6	8153.34
														61	60	15000.1	7360.03													61	60	17053.4	8146.38
														62	61	15356.1	7337.62													62	61	16840.8	8056.1
														63	62	15125	7350.27													63	62	16903.2	8166.69
														64	63	15222.7	7456.41													64	63	17151.5	8304.29
														65	64	15423.9	7502.08													65	64	16920.1	8231.04
														66	65	15379.5	7528.86													66	65	17042.3	8153.38
														67	66	15590.5	7454.36													67	66	16939.4	8296.01
														68	67	15294.4	7444.22													68	67	16757.2	8127.53
														69	68	15481.3	7388.74													69	68	16864.7	8035.66
														70	69	15549	7510.9													70	69	17059.6	8138.58
														71	70	15386.8	7451.44													71	70	16739.8	7953.57
														72	71	15444.8	7563.05													72	71	16894.2	7991.4
														73	72	15318.5	7541.54													73	72	16955.7	8230.35
														74	73	15150.6	7513.05													74	73	16917.5	8173.04
														75	74	15287.7	7502.02													75	74	16925	8021.74
														76	75	15474.9	7515.61													76	75	16776.5	8089.75
														77	76	15425.8	7492.02													77	76	16751.1	8118.1
																														78	77	17078.5	8038.86
																														79	78	17005.3	8095.68
																														80	79	16875	8120.5
																														81	80	17084	8036.33
																														82	81	16904	7965.91
																														83	82	16963.1	8057.97
																														84	83	16799	8036.86
																														85	84	16834.7	8035.93

## Sheet: A_Nup170_N159
					181101_Run8_Nu170_Mlp1_refNup159__1_MMStack_Pos3cell1asym_age24																181101_Run8_Nu170_Mlp1_refNup159__1_MMStack_Pos3cell2asym_age17																181101_Run8_Nu170_Mlp1_refNup159__1_MMStack_Pos3cell4asym_age20
		SEM	ttest
cMother	0.738386	0.0390585	0.715796		correlation	0.79208															correlation	0.918112															correlation	0.726207
cDaughter	0.755256	0.0235236									0.848872																0.668549																0.672125
cRandom	0.256059															0.184246																0.143339																0.599631
Age	22					24																17																20
n	27				Intensity	19326.3	12854.4				18900.9	12387.9				15867	7968.87				Intensity	19272.2	14565.7				20464.7	14877.5				16124.4	8076.34				Intensity	21311.6	16428.5				20975.5	15411.6				14671.5	7512.6
					Bgcorrected	3459.31	4885.57				3033.96	4419.08									Bgcorrected	3147.83	6489.32				4340.35	6801.16									Bgcorrected	6640.18	8915.86				6304.06	7899.02
										ratioDM	0.877043															ratioDM	1.37884															ratioDM	0.949381
												0.904517																1.04805																0.885951
				M					D					BG						M					D					BG						M					D					BG
				1	0	19360	12006		1	0	20097	13645		1	0	16111	8068			1	0	18094	13428		1	0	21365	18736		1	0	16406	7912			1	0	22016	16855		1	0	19988	14250		1	0	14953	7784
				2	1	18873.7	11935.1		2	1	19496.7	13216.7		2	1	15979.5	7864.08			2	1	18662.2	13707.8		2	1	19900.5	15582.9		2	1	16003.9	8039.25			2	1	21849.3	16648.6		2	1	20313.4	14456.7		2	1	15001.6	7764.73
				3	2	19236.9	12366.2		3	2	18828.5	12306.7		3	2	15795.1	8000.13			3	2	18693.2	13763.7		3	2	20392.3	15344.1		3	2	15661.6	8084.55			3	2	21721.6	16374		3	2	20640.3	14794.4		3	2	15018.9	7684.22
				4	3	19287.6	12944.5		4	3	18392.8	11518.5		4	3	15913.9	8183.86			4	3	18656.2	14090.2		4	3	20158.7	14775.9		4	3	15590.6	8046.14			4	3	21236.2	16199		4	3	20739.5	15154.6		4	3	14933.4	7629.14
				5	4	18563.2	11785		5	4	19110.4	12094.9		5	4	15910.9	8067.35			5	4	19305.3	14488.7		5	4	19862.3	14089.7		5	4	15834.1	8018.58			5	4	21297.4	16178		5	4	20632.9	15429.9		5	4	14838.9	7581.85
				6	5	18501	11169.8		6	5	18509	12205.7		6	5	15989.6	8136.14			6	5	20796.8	15395		6	5	19825.3	14088.2		6	5	16024.9	8012.95			6	5	21319.4	16213.7		6	5	20998.3	17313.9		6	5	14921.4	7619.12
				7	6	19009.1	11820.8		7	6	18703.6	12230.6		7	6	15840.4	8087.06			7	6	24318.4	18135.9		7	6	20029.8	14400.8		7	6	16255.3	8159.52			7	6	21589	17134.1		7	6	20996.8	20293.9		7	6	15128.7	7602.53
				8	7	19688.3	12786.7		8	7	18872.2	12139.3		8	7	15784.9	7906.27			8	7	28545.1	22207.3		8	7	20798.3	14500.6		8	7	16143.7	8099.49			8	7	22023.8	17021.2		8	7	20748.5	17616.9		8	7	14924	7499.73
				9	8	19267.1	12489		9	8	18767	12279		9	8	16093.7	7928.32			9	8	30007.8	24369.6		9	8	21582.4	14772.7		9	8	15940.4	8089.92			9	8	23458.7	18301.8		9	8	21137.1	15694.9		9	8	14747.8	7468.65
				10	9	18944.6	12036.6		10	9	18434	12438		10	9	16199.3	8047.91			10	9	27514.7	22696.2		10	9	20308.2	14220.4		10	9	15683.4	8122.2			10	9	23408.8	20634.5		10	9	21224.6	16083.8		10	9	14703.4	7728.26
				11	10	19076.5	12128.2		11	10	18498	12136		11	10	16113.3	7964.35			11	10	23503.4	17891.1		11	10	19741.9	14091.2		11	10	16048.3	7995.44			11	10	21570.7	17791.5		11	10	22064.4	15710.6		11	10	14815.6	7739.31
				12	11	19269.3	12649.2		12	11	19691	12394		12	11	15687	7966.4			12	11	21258.4	16086.8		12	11	19950.9	14826.4		12	11	16172.5	8114.69			12	11	20853	15468.6		12	11	21595.8	15751.7		12	11	14825.5	7635.58
				13	12	19352.7	12742.3		13	12	18865.6	12805.3		13	12	16056.7	7969			13	12	19717.6	14959.8		13	12	21366.7	16374.2		13	12	16131.2	8207.7			13	12	20791.1	15238.8		13	12	21715.1	15542.8		13	12	14843.3	7729.57
				14	13	19350.6	12768.6		14	13	18931.5	12762.3		14	13	15966.4	8033.05			14	13	19218.6	14980.8		14	13	21303.5	16255.6		14	13	16011.3	8061.23			14	13	20891.9	16298.1		14	13	21834.4	16035.6		14	13	14867.5	7701.64
				15	14	19465.3	13284.8		15	14	18467.8	12244.3		15	14	15773.2	8008.43			15	14	19022.2	14983.9		15	14	20620.7	15120.6		15	14	16043	7861.73			15	14	20979.8	16301.4		15	14	21782.8	16825.8		15	14	14754.7	7563.67
				16	15	19142.6	13068.5		16	15	18513.5	12538.4		16	15	15872.1	7979.79			16	15	18925.2	14685.8		16	15	20711.2	14988.6		16	15	16036.9	8019.31			16	15	21336.4	17660.7		16	15	22188.9	17012.6		16	15	14888	7651.78
				17	16	19108.6	12771.3		17	16	19157.5	13288.1		17	16	15853.9	7929.83			17	16	18634.3	13636.1		17	16	20898.2	15242		17	16	15928	8029.81			17	16	21321.2	19240.6		17	16	22722.1	17162.1		17	16	14836.2	7611.76
				18	17	19454.8	13052.2		18	17	19591	12884.1		18	17	15835.8	7978.9			18	17	18553.8	13552.4		18	17	20497.7	15108		18	17	16015.5	8112.62			18	17	21593.4	20331.6		18	17	21962.1	17553.8		18	17	14686.2	7600.07
				19	18	20208.5	14139.3		19	18	18251.1	11593.7		19	18	15887	8068.56			19	18	18385.3	13989.4		19	18	20301.6	15250.1		19	18	15957	8223.39			19	18	21297.7	15867.4		19	18	21501	17759.8		19	18	14727.9	7581.7
				20	19	20167.1	15707.7		20	19	18212.6	11404.6		20	19	15725.5	7983.52			20	19	17842.4	14569.1		20	19	20738.6	15555.1		20	19	16047.5	8098.46			20	19	20997.7	14693.5		20	19	21735.2	15683.5		20	19	14838	7688.81
				21	20	19738.6	15743.6		21	20	17990.6	11155.1		21	20	15771.6	7931.05			21	20	17727.9	15395.1		21	20	20726.9	15675.4		21	20	16170.7	7989.15			21	20	20895.4	15169.7		21	20	21077.4	14918.1		21	20	14800.1	7686.15
				22	21	19021.1	13926.9		22	21	18260.7	11014.4		22	21	15980.4	7897.46			22	21	18016.5	16799		22	21	20505.3	16157.9		22	21	16149.4	8122.37			22	21	21304.5	16235.4		22	21	20600	15119.9		22	21	14639.1	7522.11
				23	22	18333.6	12321.8		23	22	18676.4	11669.9		23	22	15747.3	7950.71			23	22	17750.6	16383.1		23	22	20694	15700.3		23	22	16092.5	8124.12			23	22	21386.4	16772.9		23	22	21503.1	14651		23	22	15108.5	7521.01
				24	23	18536.5	11983.1		24	23	19135.7	12692		24	23	15877.3	7997.33			24	23	17542	14338.5		24	23	21552.2	14589.2		24	23	16189.7	8068.88			24	23	21814.3	17072.4		24	23	21038.2	14087.8		24	23	14799.4	7534.53
				25	24	19280.3	12544		25	24	19316.8	13247.1		25	24	15962	8049.84			25	24	17629.8	12622.5		25	24	20262.5	13942.8		25	24	15986.8	8154.01			25	24	21036.2	16371.7		25	24	20444.3	13790.3		25	24	14710.7	7499.25
				26	25	19806.2	13643.8		26	25	19022.1	13040.9		26	25	15896	8121.56			26	25	17809.6	12398		26	25	19953.5	13291.8		26	25	16033.5	8128.81			26	25	21851.7	16770.7		26	25	20246.8	13755.5		26	25	14515.5	7567.6
				27	26	20861.2	14470.8		27	26	19139.8	12776.6		27	26	16002.3	7862.06			27	26	17842.2	12528.2		27	26	20122.4	13612.4		27	26	16033.7	8174.47			27	26	22216.9	16401.9		27	26	20070.9	13402.7		27	26	14656.5	7604.38
				28	27	20637.2	14170.4		28	27	19611.5	12996.1		28	27	15851.5	7777.94			28	27	18085.4	12748		28	27	20039	13895.3		28	27	16185.5	8029.98			28	27	21672.8	15036.3		28	27	20032.3	13247.2		28	27	14827.8	7576.41
				29	28	20372.2	14645		29	28	20053.3	13604.2		29	28	15814.4	7785.85			29	28	17974.9	13046.2		29	28	19743.2	13546		29	28	16346.3	8005.24			29	28	20436.5	14342.2		29	28	19711.6	13152.5		29	28	14749.8	7553.75
				30	29	20026.4	14077.9		30	29	19474.7	13211.7		30	29	15841.5	7933.61			30	29	17906.1	13158.4		30	29	18967	12777.2		30	29	16139.7	8017.66			30	29	19709.5	14400.1		30	29	19475.8	13011.2		30	29	14799.7	7634.89
				31	30	20352.3	13504.4		31	30	18779.8	12229.9		31	30	15782.4	8057.1			31	30	17945	13406		31	30	18938.9	13162		31	30	16094	7968.61			31	30	20915.1	15510.1		31	30	19519.7	12496.9		31	30	14800.7	7653.96
				32	31	19168.6	13565.2		32	31	18312.8	11409.9		32	31	15487.1	7979.36			32	31	18242.4	13494.8		32	31	19395.8	14175.5		32	31	15984.2	8126.89			32	31	20340.3	15086.7							32	31	14910.9	7729.83
				33	32	19395.9	13220.6		33	32	18565.5	11629.2		33	32	15823	7846.97			33	32	18512.8	13972.5		33	32	19629.2	14714.3		33	32	16317.7	8109.97			33	32	20183.5	14584.7							33	32	14928.2	7495.58
				34	33	19339.8	12700.4							34	33	15861.4	7902.55			34	33	18660.1	14263.8		34	33	19731.5	14733.7		34	33	16273.5	8200.4			34	33	20110.1	14527.3							34	33	14712.6	7519.59
				35	34	19081.7	12165.7							35	34	15857.4	7919.2			35	34	18924.9	15091.6		35	34	20207.3	14870.8		35	34	15959.9	8046.74			35	34	19945.8	14513.3							35	34	14518.9	7536.85
				36	35	19247.6	12519.7							36	35	15883.5	8028.06			36	35	18603.4	15303.3		36	35	20891.4	15478.8		36	35	15977.1	7931.14			36	35	20013	14639.9							36	35	14652.7	7503.37
				37	36	19413.1	12535							37	36	15853	8071.16			37	36	18236.1	14436.4		37	36	20582.8	15641.4		37	36	16204.7	7974.62			37	36	20869.4	16189.9							37	36	14670.2	7671.68
				38	37	19061.5	12207.6							38	37	15754.1	7899.9			38	37	18456.3	14138.7		38	37	20234.6	15039.5		38	37	16272.9	8051.72			38	37	21234.8	17514.6							38	37	14650.7	7582.44
				39	38	18415.8	11603.8							39	38	15863.1	7862.95			39	38	18448.2	13993.6		39	38	19866.4	14344		39	38	16132.1	8019.13			39	38	21323.4	17486							39	38	14676	7499.31
				40	39	18646.1	11566.9							40	39	15883.3	7867.54			40	39	18014.9	13521.2		40	39	19914.4	15192.2		40	39	15886.2	7950.72			40	39	21411.6	17903.3							40	39	14628.4	7508.91
				41	40	19271.1	12569.8							41	40	15846.6	7863.43			41	40	18402.4	13627.5		41	40	20309.8	15734.7		41	40	16069.6	8063.17			41	40	22090.3	17353.2							41	40	14759.1	7557.28
				42	41	19391.6	12738.8							42	41	15383.9	7915.82			42	41	18520.7	13445.3		42	41	19791.7	14274.8		42	41	16281.9	8171.62			42	41	21992.5	17090							42	41	14703.5	7485.98
				43	42	19153.9	12532.7													43	42	18381	12866.2		43	42	20177.6	14005.4		43	42	16219.2	8053.78			43	42	21907.9	16625.1							43	42	14663.2	7342.93
				44	43	19111.1	12300.9													44	43	18183.5	13193.6		44	43	20351.4	13844.4		44	43	16276.8	8035.02			44	43	21803.7	16178							44	43	14497.4	7432.73
				45	44	19329.9	12612.5													45	44	18149.7	13115.9		45	44	20312.2	13437.8		45	44	16132.8	7961.46			45	44	21158.6	15936.9							45	44	14600.3	7402.51
				46	45	18687.4	11781.1													46	45	18356.1	12818.6		46	45	20576	13746.4		46	45	15989.9	8025.46			46	45	21158.1	15544.8							46	45	14811.5	7320.5
																				47	46	18714.8	12976.9		47	46	20618	13897.2		47	46	16218.5	8113.52													47	46	14706.9	7536.57
																				48	47	19200.7	13376.9		48	47	20683.6	14250.9		48	47	16246.9	8074.38													48	47	14758.4	7477.22
																				49	48	19519.8	13189.2		49	48	21146.2	14905.1		49	48	16326.4	8054.13													49	48	14557.7	7299.93
																				50	49	19096.2	13031.3		50	49	20937.7	14702.2		50	49	16311.4	8092.64													50	49	14523.5	7513.5
																				51	50	18704.6	13051.7		51	50	20514.1	14344.8		51	50	16318.7	8113.85													51	50	14723.1	7551.31
																				52	51	18289.5	13258.6		52	51	20483.9	14746.9		52	51	16180.2	8225.53													52	51	14669.4	7393.03
																				53	52	18466.6	13439.5		53	52	20967.6	15455.5		53	52	16217	8206.06													53	52	14676.7	7485.48
																				54	53	18596.2	13611.6		54	53	21245.6	15585.1		54	53	16314.7	8219.12													54	53	14599.3	7531.82
																				55	54	18666	13840.8		55	54	21266.7	15826.1		55	54	16206.6	8192.47													55	54	14575.1	7531.42
																				56	55	18408.7	14279.9		56	55	21276.8	16193.6		56	55	16159.6	7968.27													56	55	14769.2	7454.6
																				57	56	18874.5	14462.5		57	56	21724.1	16716.6		57	56	16267.5	8072.5													57	56	14663.1	7348.99
																									58	57	21572.8	16624.2		58	57	16212	8128.69													58	57	14589.8	7405.18
																									59	58	20778.2	15466.8		59	58	16270.8	8162.74													59	58	14439.8	7270.07
																									60	59	20837.4	15027.6		60	59	16325	8207.6													60	59	14607.3	7370.68
																														61	60	16237.6	8185.38													61	60	14506.3	7447.61
																														62	61	16236.5	8104.21													62	61	14532.2	7289.82
																														63	62	16063.9	8121.57													63	62	14569.4	7470.88
																														64	63	16072.9	8073.49													64	63	14491.7	7536.23
																														65	64	16159.4	8073.93													65	64	14694.3	7456.86
																														66	65	16182.2	7968.11													66	65	14562.7	7457.91
																														67	66	15926	7894.04													67	66	14455.3	7455.9
																														68	67	15881.4	8017.73													68	67	14368	7399.88
																														69	68	16151.3	8045.92													69	68	14483.4	7480.86
																														70	69	16077.6	7961.02													70	69	14536.6	7455.22
																														71	70	16441.8	8094.72													71	70	14345.1	7464.77
																														72	71	15999.8	8045.31													72	71	14346.6	7492
																														73	72	16052.1	8164.85													73	72	14589.5	7321.95
																														74	73	16152.7	7804.04													74	73	14527.8	7376.37
																														75	74	16101.3	8190.3													75	74	14437.6	7373.57
																														76	75	16061.6	8083.44													76	75	14563.5	7436.67
																														77	76	16315.3	8093.96													77	76	14606.3	7348.44
																														78	77	16218.2	8113.29													78	77	14509.5	7277.54
																														79	78	16063.6	8321.32													79	78	14364	7360.86
																														80	79	16238.8	8195.8													80	79	14433.3	7389.31
																														81	80	16495.9	8039.88													81	80	14491.6	7251.37
																														82	81	16158.4	8022.01													82	81	14594.4	7381.07
																																														83	82	14500.7	7488.76
																																														84	83	14435.6	7595.01
																																														85	84	14607.2	7594.07
																																														86	85	14448.5	7416.42
																																														87	86	14510.5	7597.61

## Sheet: Y_Nup60_N159
		Y:\AnneCM\Aging chip movies\Nup_colocalizationData\181108_Run9_Nu60_Mlp1_refNup159\Single files\Asym_Age
					181108_Run9_Nu60_Mlp1_refNup159_BR__1_MMStack_Pos1cell2asym_age3																181108_Run9_Nu60_Mlp1_refNup159_BR__1_MMStack_Pos1cell3asym_age1																181108_Run9_Nu60_Mlp1_refNup159_BR__1_MMStack_Pos1cell4asym_age1
		SEM	ttest
cMother	0.673502	0.0330291	#N/A		correlation	0.552529															correlation	0.712405															correlation	0.767664
cDaughter	0.642893	0.0389331									0.663395																0.688151																0.938308
cRandom	0.23235															0.288262																0.162655																-0.0848176
Age	2					3																1																1
n	28				Intensity	7168.83	7604.01				6842.73	7852.05				3353.1	3866.99				Intensity	6884.94	7070.93				6834.44	7644.98				3393.57	3910.19				Intensity	6632.85	7511.82				5842.3	7009.15				3434.13	4042.04
					Bgcorrected	3815.73	3737.01				3489.63	3985.06									Bgcorrected	3491.36	3160.74				3440.86	3734.8									Bgcorrected	3198.72	3469.78				2408.17	2967.11
										ratioDM	0.914537															ratioDM	0.985536															ratioDM	0.752854
												1.06638																1.18162																0.855129
				M					D					BG						M					D					BG						M					D					BG
				1	0	7666	8492		1	0	7536	7616		1	0	3376	3916			1	0	7834	7055		1	0	7654	9030		1	0	3393	3928			1	0	6926	7459		1	0	6194	7096		1	0	3331	4091
				2	1	7451.62	8166.62		2	1	7675	8454		2	1	3323	3988			2	1	8454.72	7689.02		2	1	7242.99	8169.8		2	1	3335	3760.42			2	1	6983.32	7613.09		2	1	5715.85	6652.78		2	1	3411.61	4026.56
				3	2	6776.19	7585.41		3	2	8166	8377		3	2	3236	3698			3	2	8448.67	7961.49		3	2	6981.06	7509.66		3	2	3367.67	3903.84			3	2	6876.77	7716.69		3	2	5432.95	6266.18		3	2	3440.09	4008.82
				4	3	6530.52	7547.54		4	3	7987	8363		4	3	3340	3807			4	3	8271.78	8150.68		4	3	7119.94	6925.1		4	3	3314.9	3890.67			4	3	6895.62	7733.99		4	3	4899.8	5881.49		4	3	3456.99	3988.59
				5	4	6726.81	7492.84		5	4	7061.07	8783.48		5	4	3314	3788			5	4	7357.16	7534		5	4	7620.7	6968.98		5	4	3360.66	3839.04			5	4	6524.83	7669.54		5	4	4512.79	5935.29		5	4	3458.55	3922.43
				6	5	6558.27	7319.44		6	5	6753.98	8883.89		6	5	3436	3770			6	5	7668.6	7297.8		6	5	8060.94	7433.58		6	5	3375.84	3739.26			6	5	7721.47	8114.03		6	5	4087.95	5753.27		6	5	3422.19	3935.91
				7	6	6401.69	7448.38		7	6	6592.42	8470.27		7	6	3363	3799			7	6	7917.28	7215.77		7	6	7745.65	8102.34		7	6	3339.67	3966.56			7	6	7102.25	8041.3		7	6	4109.93	5772.84		7	6	3382.32	3909.21
				8	7	6602.27	7429.94		8	7	6048.17	8182.7		8	7	3380.59	3902.22			8	7	7439.46	6789.45		8	7	7029.54	7998.33		8	7	3342.65	3860.06			8	7	6717.3	7817.45		8	7	4441.48	6016.04		8	7	3427.36	3846.76
				9	8	6832.81	7592.82		9	8	6049.25	8177.55		9	8	3376.41	3836.52			9	8	6739.32	6476.25		9	8	5998	7480		9	8	3338.23	3832.09			9	8	5962.75	8357.95		9	8	4596.48	6042		9	8	3520.69	4019.35
				10	9	7014.03	7854.51		10	9	6266.48	8006.77		10	9	3315.55	3839.76			10	9	6738.6	6989.31		10	9	5648.52	7155.48		10	9	3455.17	3928.32			10	9	6834.13	7893.18		10	9	4967.05	6327.76		10	9	3439.1	3911.48
				11	10	7703.62	8044.73		11	10	6358.61	8150.92		11	10	3325.19	3839.59			11	10	6513.51	6919.26		11	10	5600.67	7157.29		11	10	3390.54	3806.18			11	10	7057.63	7513.5		11	10	5553.24	7295.16		11	10	3411.18	4029.36
				12	11	8480.84	7765.54		12	11	6597.37	8242.25		12	11	3318.75	3842.91			12	11	6834.51	7392.72		12	11	5509.16	6398.07		12	11	3324.57	3889.26			12	11	6713.49	7087.98		12	11	6444.88	8323.68		12	11	3412.79	4037.5
				13	12	8568.29	7846.69		13	12	7287.32	8119.26		13	12	3400.31	3773.25			13	12	7698.13	7587.85		13	12	5281.37	6718.2		13	12	3347.96	3909.15			13	12	6497.05	7142.18		13	12	6842.8	8262.36		13	12	3400.5	4206.65
				14	13	8970.47	8368.82		14	13	6585.89	7658.53		14	13	3376.43	3890.45			14	13	8031.09	7952.64		14	13	5151.51	6959.15		14	13	3322.35	3785.26			14	13	6322.1	7581.92		14	13	6735.48	7735.94		14	13	3442.26	4182.02
				15	14	9603.99	8459.09		15	14	6374.01	7860.06		15	14	3323.39	3850.89			15	14	7711.32	7854.63		15	14	5504.5	7018.19		15	14	3362.97	3817.26			15	14	6595.82	7953.4		15	14	6427.26	7182.04		15	14	3401.19	4062.71
				16	15	9590.81	8508.2		16	15	6677.38	7757.66		16	15	3354.52	3966.49			16	15	7291.62	8072.83		16	15	5613.76	7225.19		16	15	3405.14	3932.39			16	15	6796.63	8228.99		16	15	5950.61	7035.91		16	15	3462.03	4101.79
				17	16	7661.75	8779.58		17	16	6424.86	7731.48		17	16	3427.15	3916.83			17	16	7409.41	7878.69		17	16	5728.05	7455.34		17	16	3294.3	3916.62			17	16	6760.46	8386.4		17	16	6410.49	7258.57		17	16	3392.24	4063.1
				18	17	7218.89	8897.2		18	17	6322.26	7647.17		18	17	3456.87	3953.85			18	17	7726.37	7781.92		18	17	6673.29	8067.71		18	17	3282.51	3868.04			18	17	7353.65	8738.31		18	17	6089.71	7440.23		18	17	3409.76	4052.69
				19	18	6976.82	8471.18		19	18	6400.28	7592.73		19	18	3440.8	3958.2			19	18	6278.56	7170.99		19	18	8041.53	8612.24		19	18	3328.86	3872.91			19	18	8171.91	8775.69		19	18	6421.09	7769.43		19	18	3449.72	4150.04
				20	19	6349.95	8158.84		20	19	6804.87	7382.81		20	19	3327.27	3908.78			20	19	5166.25	7175.25		20	19	8448.5	8286.88		20	19	3391.62	3884.88			20	19	7903.51	8377.57		20	19	6872.46	8060.92		20	19	3518.32	4145.02
				21	20	6470.48	7695.31		21	20	7878.56	7553.98		21	20	3363.56	3991.19			21	20	5219.75	6669.75		21	20	8002.98	7944.89		21	20	3450.16	3894.87			21	20	7310.28	7701.01		21	20	6699.57	8281.08		21	20	3524.46	4065.55
				22	21	6843.01	7540.43		22	21	7914.49	8672.37		22	21	3258.71	3919.09			22	21	5389.25	6455		22	21	7669.45	7904.73		22	21	3358.59	4131.42			22	21	6722.93	7273.49		22	21	7260.56	7835.06		22	21	3478.9	4062.27
				23	22	6426.17	7210.98		23	22	7732.14	8732.44		23	22	3284.54	3817.09			23	22	5067.25	6076.25		23	22	7682	8518.23		23	22	3293.87	3885.85			23	22	6558.4	7481.68		23	22	7053.52	7813.83		23	22	3416.52	4059.99
				24	23	6142.93	6706.4		24	23	7553.75	7781.65		24	23	3355.42	3811.66			24	23	5045.16	5962.95		24	23	7658.93	9024.73		24	23	3389.04	3898.46			24	23	6942.32	7705.19		24	23	7392.33	8267.98		24	23	3396.31	4056.11
				25	24	6039.68	6671.72		25	24	7413.88	7758.29		25	24	3342.32	3819.27			25	24	5918.86	6690.31		25	24	7489.45	8265.24		25	24	3452.75	3868.49			25	24	6975.05	7420.56		25	24	6966.32	7997.77		25	24	3472.6	4076.9
				26	25	6274.8	6936.24		26	25	7484.86	7955.84		26	25	3327.94	3860.08			26	25	6145.75	6862.91		26	25	6538.88	6440.28		26	25	3442.27	3782.74			26	25	6646.29	7288.61		26	25	6439.54	7570.63		26	25	3507.57	4125.41
				27	26	6553.96	6468.01		27	26	6766.32	7124.77		27	26	3290.22	3848.54			27	26	5845.65	6819.23							27	26	3556.78	3795.73			27	26	6526.32	7026.88		27	26	5815.57	6692.98		27	26	3488.51	4061.66
				28	27	6899.67	6579.95		28	27	5412.16	5971.36		28	27	3338.01	3805.88			28	27	6222.78	6933.4							28	27	3392.16	3854.76			28	27	6318.98	6738.44		28	27	4863.15	5638.05		28	27	3411.6	3991.39
				29	28	7101	6313.98		29	28	4314.67	4701.34		29	28	3538.44	3836.62			29	28	7022.47	7406.18							29	28	3462.94	3934.43			29	28	6152.78	6823.15		29	28	4229.75	5060.1		29	28	3378.02	4098.04
				30	29	7083	6156.16							30	29	3366.98	3914.06			30	29	7720.15	7239.23							30	29	3374.92	3857.43			30	29	5903.46	6713.98							30	29	3455.46	4067.54
				31	30	6823.6	7039.48							31	30	3395.2	3917.66			31	30	7723.95	6930.38							31	30	3417.15	3847.87			31	30	5721.1	6844.23							31	30	3361.36	4063.8
				32	31	7356.41	8099.8							32	31	3521.12	3898.99			32	31	7240.92	6456.77							32	31	3396.79	3943.77			32	31	5619.15	6420.07							32	31	3347.53	4179.9
				33	32	6871.03	7284.39							33	32	3313.52	3832.62			33	32	6408.44	5782.23							33	32	3412.89	3933.8			33	32	5678.82	6690.24							33	32	3611.73	3915.44
														34	33	3319.32	3786.26			34	33	5587.13	5181.39							34	33	3444.13	3928.61			34	33	5899.54	6865.51							34	33	3504.01	3958.63
														35	34	3350.52	3928.01													35	34	3539	3939.88			35	34	5883.32	6849.9							35	34	3484.76	4002.75
														36	35	3326.98	3898.8													36	35	3396.22	3908.87			36	35	6004.81	7035.65							36	35	3419.55	4016.03
														37	36	3409.84	3843.05													37	36	3432.61	3927.87			37	36	5835.06	6856.65							37	36	3488.31	4119.9
														38	37	3394.81	3822.49													38	37	3443.65	4081.14													38	37	3369.9	4109.2
														39	38	3453.44	3857.02													39	38	3362.2	3984.56													39	38	3427.3	4154.68
														40	39	3388.1	3788.14													40	39	3339.51	3981.42													40	39	3455.03	4013.28
														41	40	3324.99	3778.68													41	40	3431.39	4017.99													41	40	3455.4	4011.36
														42	41	3356.75	3928.24													42	41	3375.3	3977.24													42	41	3403.22	4068.2
														43	42	3429.22	3889.89													43	42	3355.68	3884.21													43	42	3384.23	4028.45
														44	43	3475.06	3975.15													44	43	3385.62	3844.09													44	43	3353.72	3909.26
														45	44	3345.76	3910.67													45	44	3480.28	3958.27													45	44	3349.81	3985.14
														46	45	3347.57	3953.39													46	45	3415.03	3983.37
														47	46	3338.15	3831.39													47	46	3321.95	4000.74
														48	47	3334.37	3918.38													48	47	3444.29	3922.21
														49	48	3329.53	3899.28													49	48	3336.34	3971.19
														50	49	3298.52	3888.65													50	49	3419.25	3994.01
														51	50	3266.3	3830.88													51	50	3420.39	3989.8
														52	51	3271.29	3897.99													52	51	3356.14	3956.97
														53	52	3216.41	3814.89													53	52	3579.02	4014.3
														54	53	3231.51	3828.49													54	53	3460.19	3960.69
														55	54	3338.7	3767.71													55	54	3434.47	3873.01
														56	55	3473.2	3977.32
														57	56	3413.44	3866.6
														58	57	3271.2	3878.71
														59	58	3261.78	3869.88
														60	59	3311.77	3871.22

## Sheet: A_Nup60_N159
		Y:\AnneCM\Aging chip movies\Nup_colocalizationData\181108_Run9_Nu60_Mlp1_refNup159\Single files\Asym_Age
					181108_Run9_Nu60_Mlp1_refNup159_BR__1_MMStack_Pos3cell1asym_age14																181108_Run9_Nu60_Mlp1_refNup159_BR__1_MMStack_Pos3cell2asym_age25																181108_Run9_Nu60_Mlp1_refNup159_BR__1_MMStack_Pos3cell3asym_age25
		SEM	ttest
cMother	0.369265	0.0606034	0.000533205		correlation	0.481102															correlation	0.891455															correlation	0.0804194
cDaughter	0.60182	0.0331953									0.651728																0.787974																0.586728
cRandom	0.241611															0.325133																0.145077																0.238073
Age	22					14																25																25
n	28				Intensity	5092.63	8861.82				5044.21	7125.83				3127.82	3804.81				Intensity	6205.71	7845.27				6538.45	7876.92				3215.46	3821.36				Intensity	6793.2	10378.6				6631.08	8797.77				3306.17	3935.01
					Bgcorrected	1964.82	5057.01				1916.39	3321.02									Bgcorrected	2990.26	4023.91				3322.99	4055.57									Bgcorrected	3487.03	6443.64				3324.91	4862.77
										ratioDM	0.975354															ratioDM	1.11127															ratioDM	0.953509
												0.656717																1.00787																0.754661
				M					D					BG						M					D					BG						M					D					BG
				1	0	5309	11614		1	0	4818	7463		1	0	3161	3769			1	0	5745	6974		1	0	7024	7461		1	0	3124	3785			1	0	7917	10140		1	0	6943	8507		1	0	3160	3833
				2	1	5238.65	13036.9		2	1	4893.8	7257.64		2	1	3240.52	3937.56			2	1	5738.16	7063.75		2	1	7112.98	8092.67		2	1	3217.21	3800.66			2	1	7640.05	10171.3		2	1	6264.95	8661.72		2	1	3414.63	3977.07
				3	2	5106.25	11348.7		3	2	5391.52	7482.12		3	2	3167.99	3895.75			3	2	6111.9	7745.54		3	2	7082.66	8450.98		3	2	3235	3716.16			3	2	7735.94	9976.74		3	2	6164.57	7969.78		3	2	3374.48	4059.42
				4	3	4871.74	8729.52		4	3	5248.68	7203.56		4	3	3162.05	3895.85			4	3	6524.4	8016.24		4	3	6936.8	8447.45		4	3	3236.29	3764.02			4	3	8442.44	10132.8		4	3	6287.5	7353.62		4	3	3326.28	3955.26
				5	4	4861.51	8271.29		5	4	5172.76	7141.72		5	4	3230.46	3794.65			5	4	7010.8	8322.79		5	4	7020.04	8960.33		5	4	3231.57	3683.39			5	4	8665.36	10827.2		5	4	6776.68	8220.05		5	4	3255.59	3894.65
				6	5	4879.23	8068.7		6	5	5272	7005		6	5	3196.17	3790.22			6	5	6899.8	7979.59		6	5	6492.7	8249.78		6	5	3175.12	3763.1			6	5	8219.92	10922.4		6	5	7030.63	9329.66		6	5	3204.47	3875.03
				7	6	4901.62	7845.51		7	6	4995.9	6421.58		7	6	3185.03	3819.97			7	6	6656.43	7759.42		7	6	6409.54	8179.49		7	6	3240.81	3789.11			7	6	7590.8	10724		7	6	7397.58	10095.2		7	6	3321.67	3869.1
				8	7	4889.4	7342.42		8	7	5215.21	6547.22		8	7	3217.59	3806.76			8	7	6580.54	7824.66		8	7	6634.46	7871.98		8	7	3143	3791.34			8	7	7066.3	10662.4		8	7	7157.78	9850.81		8	7	3211.53	3879.43
				9	8	4887.64	7043.13		9	8	5799.3	7269.83		9	8	3132.3	3862.57			9	8	6619.38	9020.08		9	8	6448.36	7507.21		9	8	3202.75	3741.41			9	8	7598.2	11238.1		9	8	7550.74	9304.72		9	8	3219.31	3981.92
				10	9	4937.86	7003.8		10	9	6350.7	7775.78		10	9	3126.51	3823.63			10	9	6520.91	8830.33		10	9	6039.9	7000.78		10	9	3193.84	3703.25			10	9	7346.9	12018		10	9	7534.34	9423.66		10	9	3387.28	3974.77
				11	10	4935.45	7324.26		11	10	6252.86	7942.01		11	10	3234.4	3813.67			11	10	6457.54	7824.86		11	10	6255.77	7326.57		11	10	3221.79	3837.64			11	10	6320.53	11830.2		11	10	7045.11	9158.82		11	10	3308.08	3926.29
				12	11	4991.22	7407.24		12	11	5912.37	7637.1		12	11	3117.89	3839.38			12	11	6383.14	7787.69		12	11	6614.58	8224.69		12	11	3254.25	3852.33			12	11	6621.49	13341.4		12	11	7146.21	8811.9		12	11	3339.92	4009.58
				13	12	4958.34	7263.66		13	12	5451.83	7390.93		13	12	3089.59	3879.84			13	12	6231.94	7879.1		13	12	7028.12	9070.41		13	12	3184.94	3786.78			13	12	7005.27	12242.1		13	12	7288.98	8916.84		13	12	3331.26	3958.29
				14	13	4958.24	7260.92		14	13	5313.02	6848.4		14	13	3122.21	3785.7			14	13	6362.85	8145.82		14	13	6139.75	7882.63		14	13	3175.73	3754.09			14	13	6658.33	11330.3		14	13	6962.88	9156.39		14	13	3370.05	3974.82
				15	14	5052.46	7631.26		15	14	5012.15	6591.23		15	14	3073.81	3820.88			15	14	6828.78	9073.56		15	14	5782.57	7044.42		15	14	3202.22	3941			15	14	6423.42	10016.9		15	14	6481.92	10386.2		15	14	3290.39	3813.15
				16	15	5125.36	8157.06		16	15	4754.26	6766.93		16	15	3126.05	3820.55			16	15	7073.77	10004.7		16	15	5851.8	6942.46		16	15	3249.35	3788.23			16	15	6628.3	9859.75		16	15	6632.74	10070.6		16	15	3435.84	3851.28
				17	16	5106.86	9165.5		17	16	4811.09	7116.91		17	16	3198.29	3895.76			17	16	7003.76	9951.66		17	16	6162.76	7224.27		17	16	3140.22	3935.71			17	16	6694.41	10480.5		17	16	7082.37	9526.31		17	16	3347.21	4074.8
				18	17	5311.36	10913.5		18	17	4836.59	7557.9		18	17	3212.98	3914.89			18	17	7025	9445		18	17	6483.92	7423.7		18	17	3223.74	3871.09			18	17	6257.55	12027		18	17	7421.27	9250.41		18	17	3270.4	4006.36
				19	18	5339.75	9595.06		19	18	4946.28	7754.64		19	18	3170.56	3808.42			19	18	7476.5	9427.5		19	18	6372.1	7564.22		19	18	3254.12	3861.87			19	18	6200.08	16079		19	18	7529.99	9143.83		19	18	3191.32	3900.96
				20	19	5541.28	9106.93		20	19	5184.54	7877.32		20	19	3120.6	3760.91			20	19	6880.54	8775.06		20	19	6399.74	7427.1		20	19	3208.56	3759.11			20	19	6263.33	19433.7		20	19	8011.21	9478.04		20	19	3282.24	3844.76
				21	20	5650.16	9078.2		21	20	5195.14	7775.77		21	20	3136.28	3780.01			21	20	6168.69	8085.52		21	20	6309.04	7338.34		21	20	3181.39	3822.12			21	20	5981.88	16043.7		21	20	7182.51	9252.65		21	20	3247.32	3842.12
				22	21	5829.76	8840.7		22	21	5119.62	7393.03		22	21	3176.47	3901.07			22	21	5840.32	7559.74		22	21	6371.53	7538.28		22	21	3261.84	3742.21			22	21	5909.1	12630.6		22	21	6597.42	9178.84		22	21	3202.96	3838.92
				23	22	5814.71	9333.08		23	22	5112.43	7265.97		23	22	3115.64	3828.36			23	22	6031.26	7732.91		23	22	6401.12	7808.33		23	22	3243.34	3737.62			23	22	6197.11	12374.4		23	22	7016.87	9654.62		23	22	3184.6	3914.52
				24	23	5514.84	12239.5		24	23	4935.02	7665.15		24	23	3117.45	3718.13			24	23	6272.3	7836.42		24	23	6639.4	8248.76		24	23	3236.24	3829.21			24	23	6757.23	12257.2		24	23	6305.89	8270.17		24	23	3275.24	3831.08
				25	24	5216.37	11413.2		25	24	4693.31	7193.06		25	24	3035.65	3725.99			25	24	6447.71	8121.83		25	24	6999.88	8761.94		25	24	3265.52	3787.39			25	24	7002.98	10564.1		25	24	5864.98	7377.3		25	24	3309.75	4014.46
				26	25	5330.43	11089.8		26	25	4512.34	6826.17		26	25	3166.78	3873.19			26	25	5537.39	7475.22		26	25	6737.82	8834.2		26	25	3167.05	3770.96			26	25	6554.8	9432.57		26	25	6475.41	8148.72		26	25	3343.46	3973.23
				27	26	5635.29	12031.5		27	26	4377.32	6306.06		27	26	3203.7	3732.33			27	26	5635.53	7240.48		27	26	6357.94	8184.94		27	26	3203.63	3859.2			27	26	6470.01	9403.24		27	26	6878.65	8488.46		27	26	3341.19	3873.36
				28	27	5703.7	9805.73		28	27	4250.45	6013.95		28	27	3148.67	3762.22			28	27	5529.48	6662.19		28	27	6111.74	7871		28	27	3237.29	3827.72			28	27	6615.9	9420.74		28	27	6386.46	8391.53		28	27	3353.01	3831.79
				29	28	5569.64	7941.12		29	28	4151.93	5878.74		29	28	3156.21	3818.84			29	28	5247.98	6417.62		29	28	6789.12	7897.62		29	28	3138.29	3744.24			29	28	6074.59	8672.05		29	28	5872.26	8447.41		29	28	3405.26	3956.07
				30	29	5110.99	7550.58		30	29	4966.59	6947.49		30	29	3083.72	3758.49			30	29	5470.48	6625.96		30	29	6833.31	7768.89		30	29	3188.26	3879.15			30	29	5951.91	7973.72		30	29	5659.39	9014.42		30	29	3355.32	3926.61
				31	30	4973.9	7587.86		31	30	4756.92	6908.58		31	30	3141.72	3797.07			31	30	5789.2	6921.05		31	30	6844.76	8360.59		31	30	3285.33	3964.01			31	30	5850.51	7898.4		31	30	5788.44	9694.27		31	30	3337.07	3939.75
				32	31	4977.98	8063.26		32	31	4651.2	6781.13		32	31	3161.73	3760.99			32	31	5354.08	6634.98		32	31	6983.03	8494.27		32	31	3235.5	3958.08			32	31	5702.37	7988.27		32	31	5792.01	8374.66		32	31	3341.47	3863.5
				33	32	4826.9	8244.47		33	32	4698.77	6765.43		33	32	3077.04	3788.96			33	32	5080.54	6383.04		33	32	7249	8344.82		33	32	3213.84	3989.98			33	32	5518.22	8691.06		33	32	5436.28	6713.29		33	32	3303.6	3903.62
				34	33	4844.31	7821.74		34	33	4885.79	7076.53		34	33	3054.72	3846.18			34	33	5018.71	6732.4		34	33	6590.2	7534.23		34	33	3177.92	3831.7			34	33	5713.76	9015.91		34	33	6175.27	8147.81		34	33	3300.11	3956.48
				35	34	4772.61	7711.95		35	34	4892.82	7262.54		35	34	3139.2	3817.84			35	34	5602.52	7265.74		35	34	5335.42	6353.93		35	34	3213.51	3765.47			35	34	6121.9	9125.79		35	34	5869.3	8735.82		35	34	3246.33	3908.23
				36	35	4820.05	7652.06		36	35	4839.8	7249.9		36	35	3185.22	3776.7			36	35	5892.56	7109.12							36	35	3214.49	3776.18			36	35	6784.03	9890.4		36	35	5762.23	8011.58		36	35	3250.2	3971.21
				37	36	4725.04	7895.16		37	36	4972.7	7345.42		37	36	3135.79	3772.43			37	36	5863.57	7303.25							37	36	3175.74	3909.16			37	36	6402.23	9320.95		37	36	6263.04	7934.61		37	36	3244.01	3995.53
				38	37	4826.78	8044.1		38	37	5287.89	7489.96		38	37	3150.94	3823.41			38	37	6903.67	8161.24							38	37	3193.8	3898.72			38	37	6056.06	8659.9		38	37	6478.7	8448.71		38	37	3298.84	3969.45
				39	38	4838.71	8480.32		39	38	4791.2	6711.65		39	38	3016.18	3853.61													39	38	3208.5	3913.58			39	38	5447.11	7639.17		39	38	6096.62	8212.7		39	38	3353.02	4002.35
				40	39	4770.02	9150.73							40	39	3137.6	3811.77													40	39	3239.75	3974.51			40	39	6161.1	7472							40	39	3316.28	3897.65
				41	40	4630.15	9691.95							41	40	3154.12	3799.87													41	40	3305.68	3857.86			41	40	6514.5	7786							41	40	3246.77	4004.43
				42	41	4305	8399.9							42	41	3100.59	3749.14													42	41	3373.25	3846.98			42	41	6175.4	7908.2							42	41	3304.22	4024.87
														43	42	2976.72	3724.79													43	42	3309.94	3852.09			43	42	6556.3	8215.5							43	42	3357.43	3986.5
														44	43	3032.64	3726.88													44	43	3267.41	3845.08			44	43	6634.21	8375.17							44	43	3373.57	4000.2
														45	44	3094.34	3648.32													45	44	3223.73	3868.26			45	44	6565.44	9164.46							45	44	3342.58	3934.59
														46	45	3194.65	3705.3													46	45	3156.66	3829.82			46	45	6894.13	9425.78							46	45	3320.06	4064.18
														47	46	3118.12	3781.34													47	46	3235.59	3759.02			47	46	7869.32	10079.8							47	46	3302.23	4058.83
														48	47	3120.95	3783.24													48	47	3302.23	3742.17			48	47	7644.7	10248.6							48	47	3295.38	3847.35
														49	48	3078.04	3715.21													49	48	3238.61	3800.73			49	48	7768.78	9923.24							49	48	3300.92	3973.09
														50	49	3086.72	3698.09													50	49	3226.16	3789.11			50	49	8084.94	9861.26							50	49	3285.79	3910.26
														51	50	3144.96	3730.89													51	50	3127.83	3830.03			51	50	7545.57	9874.4							51	50	3349.87	3941.32
														52	51	3080.17	3784.41													52	51	3207.1	3839.05			52	51	8424.56	10899.4							52	51	3390.85	3804.98
														53	52	3127.73	3740.9													53	52	3221.62	3888
														54	53	3084.37	3770.24													54	53	3202.35	3886.9
														55	54	2976.69	3697.76													55	54	3105.13	3856.33
														56	55	3133.08	3783.16													56	55	3286.37	3893.92
														57	56	3201.93	3783.32													57	56	3257.07	3901.58
														58	57	3148.86	3700.27													58	57	3162	3776.63
														59	58	3050.68	3709.68													59	58	3136.53	3729.84
														60	59	3120.37	3797.34													60	59	3211.09	3833.77
														61	60	3215.27	3711.3													61	60	3240.49	3879.46
														62	61	3070.14	3819.03													62	61	3189.36	3832.28
														63	62	3166.72	3836.21													63	62	3252.09	3756.79
														64	63	3067	3903													64	63	3161.62	3664.4
														65	64	3140.51	3723.07													65	64	3209.21	3721.51
														66	65	3061.57	3795.51
														67	66	3033.37	3835.63
														68	67	3163.57	3977.91
														69	68	3085.07	3933.3
														70	69	3086.37	3858.01
														71	70	3199.64	3873.56
														72	71	3153.85	3930.82
														73	72	3065.63	3866.53
														74	73	3070.08	3710.74
														75	74	2960.33	3771.82
														76	75	3088.58	3851.02
														77	76	3111.52	3825.18
														78	77	2974.2	3619.38
														79	78	3166.76	3910.52
														80	79	3262.36	3851.96
														81	80	3204.56	3759.72
														82	81	3139.6	3863.52
														83	82	3094.76	3788.32
														84	83	3167.88	3900.2
														85	84	3160.44	3949.16
														86	85	3129.28	3927.96
														87	86	3233.6	3877.08
														88	87	3122.8	3638.84
