# Supplementary material for: DNA circles promote yeast ageing in part through stimulating the reorganization of nuclear pore complexes
Source: eLife. 2022 Apr 4;11:e71196. doi: 10.7554/eLife.71196 (PMC9020822; doi:10.7554/eLife.71196)
Supplement: Figure 4—source data 1. [file elife-71196-fig4-data1.xlsx]

## Sheet: Overview_Nup170timer
																								ToR																					ToR
Nup159-mCherry-GFP
																					0.000713839											0.483729			0.709699			0			0.22597
		Young			Old
	age	2			21
	Mother/Daughter	M	D		M	D															Young	Old										log2						log2_normalized
	ratio	mCh/GFP	mCh/GFP		mCh/GFP	mCh/GFP															mCh/GFP	mCh/GFP			MY_mCh/GFP	DY_mCh/GFP		OM_mCh/GFP	OD_mCh/GFP			MY_mCh/GFP	DY_mCh/GFP		OM_mCh/GFP	OD_mCh/GFP		MY_mCh/GFP	DY_mCh/GFP		OM_mCh/GFP				MY_mCh/GFP	DY_mCh/GFP		OM_mCh/GFP
		0.728803	0.764979		0.70617	0.771084															0.728803	0.70617			0.728803	0.764979		0.70617	0.771084			-0.456399	-0.386507		-0.501913	-0.37504		-0.940128	-0.870236		-0.985642	-0.858769			-0.940128	-0.870236		-0.985642	-0.858769
		0.903984	0.830314		0.883091	0.968859															0.903984	0.883091			0.903984	0.830314		0.883091	0.968859			-0.145631	-0.268271		-0.179366	-0.0456415		-0.62936	-0.751999		-0.663095	-0.52937			-0.62936	-0.751999		-0.663095	-0.52937
		0.890598	0.86791		0.946363	0.923646															0.890598	0.946363			0.890598	0.86791		0.946363	0.923646			-0.167154	-0.204383		-0.079535	-0.114589		-0.650883	-0.688112		-0.563264	-0.598318			-0.650883	-0.688112		-0.563264	-0.598318
		0.744418	0.759495		1.28073	1.11312															0.744418	1.28073			0.744418	0.759495		1.28073	1.11312			-0.425815	-0.396888		0.356961	0.154604		-0.909544	-0.880617		-0.126768	-0.329125			-0.909544	-0.880617		-0.126768	-0.329125
		0.853649	0.949024		0.919043	1.0124															0.853649	0.919043			0.853649	0.949024		0.919043	1.0124			-0.228285	-0.0754834		-0.121795	0.0177743		-0.712014	-0.559212		-0.605524	-0.465955			-0.712014	-0.559212		-0.605524	-0.465955
		0.788882	0.874959		0.732299	0.875332															0.788882	0.732299			0.788882	0.874959		0.732299	0.875332			-0.342118	-0.192712		-0.449495	-0.192098		-0.825847	-0.676441		-0.933224	-0.675827			-0.825847	-0.676441		-0.933224	-0.675827
		0.78772	0.821253		1.66002	2.07742															0.78772	1.66002			0.78772	0.821253		1.66002	2.07742			-0.344245	-0.284102		0.731205	1.05479		-0.827974	-0.767831		0.247476	0.571061			-0.827974	-0.767831		0.247476	0.571061
		0.738988	0.788211		1.73647	1.65378															0.738988	1.73647			0.738988	0.788211		1.73647	1.65378			-0.436377	-0.343346		0.796159	0.725769		-0.920106	-0.827075		0.31243	0.24204			-0.920106	-0.827075		0.31243	0.24204
		0.649736	0.716332		1.96024	1.90185															0.649736	1.96024			0.649736	0.716332		1.96024	1.90185			-0.622074	-0.4813		0.971032	0.927407		-1.1058	-0.965029		0.487303	0.443678			-1.1058	-0.965029		0.487303	0.443678
		1.8554	1.62575		2.08464	2.07367															1.8554	2.08464			1.8554	1.62575		2.08464	2.07367			0.89173	0.701108		1.0598	1.05218		0.408001	0.217379		0.57607	0.568455			0.408001	0.217379		0.57607	0.568455
		1.4857	1.61542		1.57459	1.73189															1.4857	1.57459			1.4857	1.61542		1.57459	1.73189			0.571145	0.69191		0.654975	0.792351		0.0874162	0.208181		0.171246	0.308622			0.0874162	0.208181		0.171246	0.308622
		1.43228	1.57952		1.4323	1.64661															1.43228	1.4323			1.43228	1.57952		1.4323	1.64661			0.518318	0.659488		0.518334	0.719495		0.0345891	0.175759		0.034605	0.235766			0.0345891	0.175759		0.034605	0.235766
		1.76735	1.82061		1.6669	1.57032															1.76735	1.6669			1.76735	1.82061		1.6669	1.57032			0.821585	0.864426		0.73717	0.651055		0.337856	0.380697		0.253441	0.167327			0.337856	0.380697		0.253441	0.167327
		1.33541	1.12277		1.68165	1.53558															1.33541	1.68165			1.33541	1.12277		1.68165	1.53558			0.417281	0.167067		0.749875	0.618779		-0.0664484	-0.316662		0.266146	0.13505			-0.0664484	-0.316662		0.266146	0.13505
		1.21948	1.38791		1.37593	1.38631															1.21948	1.37593			1.21948	1.38791		1.37593	1.38631			0.286264	0.472918		0.460406	0.47125		-0.197465	-0.0108109		-0.0233231	-0.0124788			-0.197465	-0.0108109		-0.0233231	-0.0124788
		1.64762	1.52485		1.41747	1.48012															1.64762	1.41747			1.64762	1.52485		1.41747	1.48012			0.720383	0.608668		0.503322	0.565717		0.236654	0.124939		0.0195935	0.0819875			0.236654	0.124939		0.0195935	0.0819875
		1.40887	1.30317		1.81901	1.91273															1.40887	1.81901			1.40887	1.30317		1.81901	1.91273			0.49454	0.382023		0.86315	0.935631		0.0108109	-0.101706		0.379421	0.451902			0.0108109	-0.101706		0.379421	0.451902
		1.24711	1.13148		1.69092	1.359															1.24711	1.69092			1.24711	1.13148		1.69092	1.359			0.318587	0.178207		0.757807	0.442548		-0.165142	-0.305522		0.274078	-0.0411814			-0.165142	-0.305522		0.274078	-0.0411814
		1.68109	1.56726		1.60683	1.82686															1.68109	1.60683			1.68109	1.56726		1.60683	1.82686			0.749398	0.648248		0.68422	0.869364		0.265669	0.164519		0.200491	0.385635			0.265669	0.164519		0.200491	0.385635
		1.60373	1.72913		1.72154	1.63937															1.60373	1.72154			1.60373	1.72913		1.72154	1.63937			0.681429	0.790042		0.783701	0.713143		0.1977	0.306313		0.299972	0.229414			0.1977	0.306313		0.299972	0.229414
		1.44547	1.68821		1.83013	2.00898															1.44547	1.83013			1.44547	1.68821		1.83013	2.00898			0.531541	0.755494		0.871944	1.00646		0.0478124	0.271765		0.388215	0.522731			0.0478124	0.271765		0.388215	0.522731
		1.24866	1.36595		1.63922	1.63171															1.24866	1.63922			1.24866	1.36595		1.63922	1.63171			0.320375	0.449903		0.713013	0.706385		-0.163354	-0.0338263		0.229284	0.222656			-0.163354	-0.0338263		0.229284	0.222656
		1.54226	1.56126		1.75846	1.6915															1.54226	1.75846			1.54226	1.56126		1.75846	1.6915			0.625041	0.64271		0.814312	0.758302		0.141312	0.158981		0.330583	0.274574			0.141312	0.158981		0.330583	0.274574
		1.27196	1.43931		1.50457	1.44508															1.27196	1.50457			1.27196	1.43931		1.50457	1.44508			0.347057	0.525378		0.58935	0.531145		-0.136672	0.0416493		0.105621	0.0474163			-0.136672	0.0416493		0.105621	0.0474163
		1.19004	1.4097		1.48063	1.43868															1.19004	1.48063			1.19004	1.4097		1.48063	1.43868			0.251013	0.49539		0.566214	0.524747		-0.232716	0.011661		0.0824853	0.0410185			-0.232716	0.011661		0.0824853	0.0410185
		1.6913	1.44549		1.9057	1.7861															1.6913	1.9057			1.6913	1.44549		1.9057	1.7861			0.758135	0.531563		0.930322	0.836812		0.274406	0.0478342		0.446593	0.353083			0.274406	0.0478342		0.446593	0.353083
		1.50863	1.38686		1.84022	1.75939															1.50863	1.84022			1.50863	1.38686		1.84022	1.75939			0.59324	0.471827		0.879875	0.815074		0.109511	-0.011902		0.396146	0.331345			0.109511	-0.011902		0.396146	0.331345
		1.60916	1.55746		1.81998	1.5753															1.60916	1.81998			1.60916	1.55746		1.81998	1.5753			0.686311	0.639194		0.86392	0.655624		0.202583	0.155465		0.380191	0.171895			0.202583	0.155465		0.380191	0.171895
		1.31941	1.58263		1.79877	1.51847															1.31941	1.79877			1.31941	1.58263		1.79877	1.51847			0.399897	0.662326		0.847008	0.602618		-0.0838316	0.178597		0.363279	0.118889			-0.0838316	0.178597		0.363279	0.118889
		1.48437	1.64656																		1.48437	0.771084			1.48437	1.64656						0.569851	0.719457					0.0861222	0.235728						0.0861222	0.235728
		2.09886	1.5573																		2.09886	0.968859			2.09886	1.5573						1.06961	0.639043					0.58588	0.155314						0.58588	0.155314
																					0.764979	0.923646
																					0.830314	1.11312
																					0.86791	1.0124
																					0.759495	0.875332
																					0.949024	2.07742
																					0.874959	1.65378
																					0.821253	1.90185
																					0.788211	2.07367
																					0.716332	1.73189
																					1.62575	1.64661
																					1.61542	1.57032
																					1.57952	1.53558
																					1.82061	1.38631
																					1.12277	1.48012
																					1.38791	1.91273
																					1.52485	1.359
																					1.30317	1.82686
																					1.13148	1.63937
																					1.56726	2.00898
																					1.72913	1.63171
																					1.68821	1.6915
																					1.36595	1.44508
																					1.56126	1.43868
																					1.43931	1.7861
																					1.4097	1.75939
																					1.44549	1.5753
																					1.38686	1.51847
																					1.55746
																					1.58263
																					1.64656
																					1.5573

## Sheet: Y_Nup170mChGFP
Saved in folder:		Y:\AnneCM\Aging chip movies\Nup_colocalizationData\181108_Run9_Nu60_Mlp1_refNup159\Single files\Asym_Age
						180619_11990_10885_Nup60Nup159_Nup170timer_Fl1_1_MMStack_Pos23cell2asym_age2															180619_11990_10885_Nup60Nup159_Nup170timer_Fl1_1_MMStack_Pos23cell4asym_age2															180619_11990_10885_Nup60Nup159_Nup170timer_Fl1_1_MMStack_Pos23cell5asym_age1
		SEM	ttest
cMother	0.626364	0.0340249	0.195089			correlation	0.745611															0.824063															0.810199
cDaughter	0.682092	0.0255181										0.704868															0.607581															0.800634
cRandom	0.148264																0.836181															-0.203783															0.456248
Age	2						2															2															1
n	31					Intensity	8152.11	6836.42				6646.32	5891.57				2428.73	2665.2			Intensity	6822.57	6610				6621.16	6101.69				2192.78	2424.74			Intensity	7814.51	7535.44				7084.4	6779.86				2441.48	2750.23
						Bgcorrected	5723.38	4171.22				4217.59	3226.37								Bgcorrected	4629.79	4185.26				4428.38	3676.95								Bgcorrected	5373.03	4785.21				4642.92	4029.63
GFP/mCh_M	0.854142						1.37211															1.10621															1.12284
GFP/mCh_D	0.835992											1.30722															1.20436															1.15219
GFP/mCh_BG	1.15586																0.911274															0.904335															0.887737
ttest	0.803182
					M					D					BG					M					D					BG					M					D					BG
					1	0	8514	8025		1	0	7562	6155		1	0	2453	2589		1	0	7266	7124		1	0	6932	5796		1	0	2235	2316		1	0	9461	10109		1	0	7185	7156		1	0	2477	2746
					2	1	8367	7984		2	1	6887.99	6128.72		2	1	2509.77	2670.53		2	1	7386.45	6859.22		2	1	6588.2	6425.8		2	1	2137	2350		2	1	9401	9637		2	1	6267.19	6150.45		2	1	2154.81	2663
					3	2	8099	6796		3	2	6694.62	6541.19		3	2	2411.2	2676.9		3	2	7147.58	7235.19		3	2	6192.8	6296.16		3	2	2242	2367		3	2	8586	8206		3	2	5926.35	5757.19		3	2	2352.61	2805.79
					4	3	7270	6104		4	3	7057.14	7294.33		4	3	2412.18	2636.64		4	3	7136.27	7360.02		4	3	6170.4	5559.4		4	3	2158	2408		4	3	7987	7158		4	3	5892.11	5797.48		4	3	2394.02	2751.79
					5	4	7831.37	6664.01		5	4	6510.44	6075.58		5	4	2342.7	2574.64		5	4	7410.24	7581.81		5	4	5992.64	4884.8		5	4	2233	2526		5	4	6996	6478		5	4	6504.71	6238.72		5	4	2407.6	2650.07
					6	5	8156.66	6714.73		6	5	6120.62	5157.41		6	5	2417.76	2509.78		6	5	6601.69	7407.59		6	5	6034	5080		6	5	2064	2551		6	5	7165	6740		6	5	6616.65	6384.5		6	5	2467.2	2688.3
					7	6	8112.96	6532.81		7	6	5940.97	5169.09		7	6	2210.06	2314.67		7	6	7738.82	7619.33		7	6	6256.06	4945.71		7	6	2204	2484		7	6	7291.78	6289.84		7	6	6442.31	6274.89		7	6	2357.66	2754.51
					8	7	8223.94	6011.07		8	7	6661.58	5695.67		8	7	2288.15	2405.64		8	7	7688.72	7750.48		8	7	6537.2	5267.34		8	7	2183	2352		8	7	7297.11	6530.22		8	7	6366.65	6281.79		8	7	2382.92	2701.19
					9	8	7945.05	5929.24		9	8	6547.61	5598.19		9	8	2390.82	2531.47		9	8	8406.13	7752.63		9	8	6616	5898.5		9	8	2177	2342		9	8	6926.36	6810.97		9	8	5954.55	6289.83		9	8	2282.89	2614.21
					10	9	7446.38	6104.51		10	9	6629.47	5428.06		10	9	2498.45	2618.02		10	9	8113.95	7020.95		10	9	6844.19	6496.6		10	9	2228	2418		10	9	7213.3	6714.72		10	9	6153	6645.6		10	9	2382.13	2694.35
					11	10	7475.18	6495.63		11	10	6617.88	5489.78		11	10	2736.84	3028.88		11	10	7312.7	6716.98		11	10	6905.44	6570.83		11	10	2077	2498		11	10	7466.87	6540.75		11	10	7114.8	7123.8		11	10	2464.87	2556.9
					12	11	7764.84	6549.88		12	11	6900.62	5642.29		12	11	2683.07	3136.58		12	11	7232.56	7222.78		12	11	6590.86	6467.56		12	11	2178	2362		12	11	7253.57	6670.8		12	11	7597.6	6775.2		12	11	2419.61	2687.46
					13	12	8041.29	6839.01		13	12	6563.71	5562.14		13	12	2601.2	2868.31		13	12	7459.52	7594.62		13	12	6493.32	6069.87		13	12	2184	2499		13	12	7072.54	6410.91		13	12	7154.95	6547.32		13	12	2476.88	2857.15
					14	13	8055.44	6967.59		14	13	6743.57	5756.77		14	13	2373.72	2631.29		14	13	7232.6	7869.85		14	13	7284.69	6243.91		14	13	2214	2476		14	13	7180.47	5834.59		14	13	7106.71	6587.22		14	13	2379.31	2692.01
					15	14	8483.57	6934.51		15	14	7010.43	6245.96		15	14	2333.92	2592.24		15	14	6818.15	7624.48		15	14	7780.4	6740.1		15	14	2099	2521		15	14	6674.35	5800.78		15	14	7714.55	6715.1		15	14	2351.81	2724.16
					16	15	8590.79	6926.53		16	15	6885.2	6277.33		16	15	2472.46	2617.22		16	15	6672.92	6644.08		16	15	7126.97	7534.55		16	15	2241	2402		16	15	6409.26	6077.75		16	15	8119.29	6396.99		16	15	2383.13	2857.02
					17	16	8440.42	6941.11		17	16	6897.33	6207.06		17	16	2362.5	2691.57		17	16	6596.37	5696.94		17	16	6714.38	7332.17		17	16	2206	2374		17	16	6939.19	6529.62		17	16	8266.2	7252.4		17	16	2419.22	2606.49
					18	17	8680.98	7059.22		18	17	7171.85	6807.66		18	17	2418.38	2649.71		18	17	6287.74	4782.19		18	17	6845.53	6845.13		18	17	2190	2317		18	17	7705.31	6829.64		18	17	8555.7	8230.6		18	17	2409.54	2805.12
					19	18	9272.62	7334.52		19	18	6693.65	6191.46		19	18	2424.82	2663.98		19	18	5941.15	4881.18		19	18	6896.12	6667.38		19	18	2224	2425		19	18	8167.23	6570.61		19	18	8247	8746.7		19	18	2506.74	2756.4
					20	19	9028.99	7181.69		20	19	6480.03	5726.87		20	19	2330.39	2765.08		20	19	6040.88	5031.49		20	19	7026.32	6480.94		20	19	2093	2415		20	19	7987	6820.23		20	19	7984.29	8302.36		20	19	2513.42	2775.71
					21	20	8797.31	7413.82		21	20	6560.98	5699.67		21	20	2466.19	2740.07		21	20	6065.09	5509.39		21	20	7099.23	5972.58		21	20	2307	2484		21	20	8081.07	7741.68		21	20	7846.75	7901.56		21	20	2515.42	2753.99
					22	21	8963.74	7820.15		22	21	6038.38	5869.64		22	21	2420.71	2719.72		22	21	5989.3	5633.8		22	21	6578.3	5392.32		22	21	2180	2271		22	21	8026.69	8262.83		22	21	7841.4	7500.04		22	21	2502.68	2810.73
					23	22	8560.43	7349.3		23	22	5748.62	5068.47		23	22	2389.98	2677.59		23	22	6066.7	5930.8		23	22	6339.16	5638.98		23	22	2287	2403		23	22	8247.8	8161.54		23	22	7347.86	6911.69		23	22	2459.68	2782.65
					24	23	7298.3	6564.99		24	23	6321.17	5440.74		24	23	2423.76	2605.83		24	23	6206.1	6015.3		24	23	6480.56	6134.06		24	23	2146	2539		24	23	9007.54	8119.04		24	23	6689.27	6390.23		24	23	2543.3	2798.21
					25	24	6382.59	5667.22		25	24	6912.07	6060.17		25	24	2393.27	2708.32		25	24	5363.55	5578.15		25	24	6299.31	5777.14		25	24	2281	2416		25	24	8734.24	8239.28		25	24	6449.73	5342.61		25	24	2537.03	2824.62
															26	25	2403.15	2619.3		26	25	5252.68	5414.89		26	25	6275.96	5698.42		26	25	2228	2309		26	25	8320.32	8511.92		26	25	7015.82	6416.61		26	25	2509.9	2790.11
															27	26	2407.29	2717.5		27	26	5656.02	5559.44		27	26	6496.11	6372.82		27	26	2209	2643		27	26	7719.74	8042.23		27	26	7465	7284.79		27	26	2515.41	2889.23
																				28	27	6285.39	5880.34		28	27	6310.71	6587.47							28	27	8334.87	7760.07		28	27	6537.72	6434.47		28	27	2516.93	2828.54
																				29	28	7146.84	6668.28		29	28	6306.7	5772.41							29	28	8156.56	8298.4							29	28	2520.56	2751.38
																				30	29	7441.94	7119.22												30	29	7587.06	8449.68							30	29	2531.36	2744.48
																				31	30	7399.98	7113.44												31	30	8350.95	9406.68							31	30	2532.89	2821.27
																				32	31	7169.44	7083.2												32	31	8272.02	9632.7							32	31	2458.86	2824.47
																				33	32	6611.4	6847.94												33	32	7859.54	9283.9
[truncated: 336 more columns]

## Sheet: A_Nup170mChGFP
Saved in folder:		Y:\AnneCM\Aging chip movies\Nup_colocalizationData\180619_Run5_Nup60+Nup159_Nup170timer\SingleTifs\Selection\
						180619_11990_10885_Nup60Nup159_Nup170timer_Br1_2_MMStack_Pos22cell1asym_age24																180619_11990_10885_Nup60Nup159_Nup170timer_Br1_2_MMStack_Pos22cell2asym_age22																180619_11990_10885_Nup60Nup159_Nup170timer_Br1_2_MMStack_Pos22cell4asym_age21
		SEM	ttest
cMother	0.74804	0.0210919	0.00239083			correlation	0.852133															correlation	0.861281															correlation	0.65609
cDaughter	0.627756	0.0313784										0.608411																0.926722																0.740227
cRandom	0.262453																0.191827																0.374908																0.188382
Age	21						24																22																21
n	29					Intensity	6765.26	5738.36				6041.68	5466.99				2350.46	2620.75				Intensity	6909.71	6646.13				6145.28	6299.71				2313.59	2587.33				Intensity	9094.32	9068.62				7058.59	7038.87				2515.65
						Bgcorrected	4414.81	3117.6				3691.22	2846.24									Bgcorrected	4596.12	4058.8				3831.7	3712.37									Bgcorrected	6578.67	6225.81				4542.94	4196.06
GFP/mCh_M	0.708652						1.41609																1.13239																1.05668
GFP/mCh_D	0.701054											1.29688																1.03214																1.08267
GFP/mCh_BG	1.15872																0.896864																0.894197																0.884919
ttest	0.901438
					M					D					BG						M					D					BG						M					D					BG
					1	0	7454	6388		1	0	6764	5829		1	0	2532	2513			1	0	8277	9049		1	0	4867	5453		1	0	2204	2652			1	0	8949	10064		1	0	6803	6173		1	0	2476
					2	1	6991.79	6326.77		2	1	6460	5383		2	1	2426.31	2675.96			2	1	8334.76	8155.83		2	1	5081.4	5283.47		2	1	2369.32	2570.75			2	1	9209.22	9505.01		2	1	6515.84	6828.61		2	1	2482.62
					3	2	7287.94	6602.56		3	2	6529	5395		3	2	2440.78	2672.41			3	2	7689	7407.94		3	2	5070.72	5174.34		3	2	2298.42	2517.98			3	2	9051.95	8284.96		3	2	6840.1	6758.86		3	2	2520.8
					4	3	7711.43	7420.65		4	3	6496.97	5721.02		4	3	2435.45	2616.04			4	3	6820.82	6861.07		4	3	4948.02	5244.02		4	3	2296.51	2515.88			4	3	9204.46	7422		4	3	7382.53	6805.95		4	3	2496.84
					5	4	7510.02	6836.05		5	4	6751.74	5758.33		5	4	2438.33	2637.21			5	4	6311.89	6615.7		5	4	4711.69	5172.02		5	4	2265.34	2546.37			5	4	8977	7733.68		5	4	7497.54	7040.62		5	4	2474.34
					6	5	6567.46	5654.18		6	5	6614.02	5763.17		6	5	2384.23	2627.48			6	5	6946.46	7277.27		6	5	5624.63	6467.13		6	5	2317.16	2534.53			6	5	8566.34	7549.72		6	5	8188.26	7838.09		6	5	2469.83
					7	6	5768.93	4706.06		7	6	5977.86	5877.55		7	6	2396.74	2681.77			7	6	7273.53	7769.59		7	6	6329.23	7533.07		7	6	2308.32	2540.87			7	6	8113.8	8249.4		7	6	7945.91	8730.88		7	6	2515.8
					8	7	5323.13	4266.34		8	7	5920.86	5441.5		8	7	2416.91	2719.8			8	7	7284.04	7541.7		8	7	7055.6	8203.86		8	7	2231.44	2436.1			8	7	8893.68	9622.62		8	7	7387.53	7886.58		8	7	2520.47
					9	8	5126.52	4150.55		9	8	6039.2	5334.71		9	8	2396.19	2662.43			9	8	6929.01	6391.53		9	8	7446.82	7458.41		9	8	2269.94	2521.16			9	8	9668.48	10092.3		9	8	6894.34	7033.51		9	8	2509.91
					10	9	5395.46	4065.91		10	9	6126.68	5648.24		10	9	2377.13	2590			10	9	6443.21	5728.78		10	9	7009.68	6863.5		10	9	2312.2	2666.42			10	9	10392.8	10821.2		10	9	6184.81	6595.75		10	9	2482.46
					11	10	5590.19	3972.35		11	10	6126.25	5683.74		11	10	2340.66	2637.23			11	10	5884.65	5615.88		11	10	7739.29	6993.4		11	10	2222.67	2603.08			11	10	10483.9	10492.2		11	10	6267.95	7036.42		11	10	2528.55
					12	11	5849.96	4292.13		12	11	5949.69	5454.94		12	11	2328.08	2659.96			12	11	5760.22	5616.56		12	11	7941.6	7248.92		12	11	2325.94	2632.9			12	11	10284.1	9765.43		12	11	6979.28	7882.36		12	11	2451.57
					13	12	6105.7	5091.7		13	12	5974.44	5403.51		13	12	2292.55	2609.37			13	12	6139.73	6148.14		13	12	7555.92	7417.72		13	12	2198.86	2501.74			13	12	10026.7	9756.99		13	12	7100.87	7685.9		13	12	2408.39
					14	13	6215.16	5026.37		14	13	6231.25	5749.93		14	13	2319.95	2637.22			14	13	6767.54	7250.89		14	13	7696.92	7702.75		14	13	2329.86	2624.34			14	13	9553.34	8924.1		14	13	6385.76	6873.31		14	13	2520.29
					15	14	7338.64	5532.24		15	14	5620.94	5629.78		15	14	2341.08	2693.6			15	14	7501.31	6982.61		15	14	8018.99	8133.92		15	14	2347.46	2595.92			15	14	9155.73	9051.32		15	14	5792.85	5872.23		15	14	2658.55
					16	15	8090.1	6072.12		16	15	5195.04	5453.06		16	15	2273.06	2659.89			16	15	7237.41	6341.3		16	15	7551.88	8192.16		16	15	2405.41	2591.39			16	15	9146.36	9045.52		16	15	6014.94	5788.38		16	15	2545.88
					17	16	8504.08	6553.93		17	16	4983.4	5271.64		17	16	2308.39	2590.22			17	16	6896.44	5984.73		17	16	7454.9	7785.33		17	16	2289.79	2574.01			17	16	9226.39	9060.77		17	16	5941.15	5480.55		17	16	2540.07
					18	17	7809.89	6272.28		18	17	5029.53	5148.52		18	17	2334.92	2662.41			18	17	6552.32	6006.91		18	17	7621.15	7776.33		18	17	2276.07	2587.5			18	17	9575.23	9482.13		18	17	6604.7	6799.9		18	17	2531.1
					19	18	7479.49	6106.51		19	18	5517.35	5048.49		19	18	2337.07	2592.74			19	18	6403.14	6365.91		19	18	7768.96	7463.25		19	18	2313.63	2614.44			19	18	10078.3	9675.14		19	18	7547.3	7483.2		19	18	2518.59
					20	19	7058.03	5882.21		20	19	5347.92	4986.5		20	19	2255.44	2580.19			20	19	6360.31	6226.32		20	19	7468.31	6783.56		20	19	2342.45	2650.28			20	19	10099.1	9666.74		20	19	7987.5	7034.1		20	19	2523.03
					21	20	6769.2	5951.94		21	20	4770.06	4852.92		21	20	2309.5	2602.79			21	20	6261.08	5969.96		21	20	6547.57	6236.45		21	20	2310.31	2683.81			21	20	10318.2	9749.73		21	20	7562.3	6772.1		21	20	2612.31
					22	21	6580.13	5870.47		22	21	6049.02	5676.93		22	21	2245.41	2539.91			22	21	5995.45	5721.62		22	21	5892.53	5985.25		22	21	2319.79	2655.61			22	21	10004.9	9850.2		22	21	7285.8	6383.1		22	21	2564.36
					23	22	6246.59	5718.94		23	22	6743.78	5825.22		23	22	2232.04	2584.5			23	22	5885.76	5423.05		23	22	5532.94	5421.82		23	22	2246.93	2536.77			23	22	9923.77	9729.35		23	22	6930.47	6728.18		23	22	2577.4
					24	23	6441.85	6178		24	23	6469.12	5396.38		24	23	2309.86	2614.4			24	23	5806.49	5295.17		24	23	5723.84	5449.91		24	23	2336.05	2554.02			24	23	10089.6	9193.75		24	23	6861.55	7553.54		24	23	2580.76
					25	24	6406.66	6462.58		25	24	6526.93	5394.64		25	24	2342.61	2500.73			25	24	5554.75	5125.91		25	24	5464.41	6037.12		25	24	2409.38	2551.89			25	24	10250	8866.75		25	24	7242.6	7547.47		25	24	2483.17
					26	25	7179.56	6220.34		26	25	6580.41	5537.59		26	25	2297.19	2578.31			26	25	5752.9	5157.64		26	25	4989.46	5808.44		26	25	2404.17	2591.69			26	25	10272.7	8959.41		26	25	6482.32	6463.55		26	25	2419.35
					27	26	6981.74	6285.59		27	26	6329.8	4943.51								27	26	5949.04	5704.48		27	26	4485.78	4778.82		27	26	2383.67	2627.83			27	26	9411.2	9513.95		27	26	6503.14	6238		27	26	2530.47
					28	27	7408.42	6789.84													28	27	6304.43	6048.58		28	27	4388.88	4672.86		28	27	2379.68	2682.9			28	27	8596.48	9242.62		28	27	6573.28	6818.16		28	27	2540.5
					29	28	7709.67	6415.3													29	28	6900.02	5796.58		29	28	4397.47	4514.8		29	28	2379.22	2670.49			29	28	9167.67	8789.98		29	28	6860.41	6951.72		29	28	2542.56
					30	29	6056.19	5038.75													30	29	7275.27	6074.17		30	29	4780.16	5070.09								30	29	8997.97	8775.2		30	29	7232.52	6755.12		30	29	2501.47
																					31	30	7439.91	6391.64		31	30	5087.3	5375.84								31	30	8376.51	8707.56		31	30	7650.07	7157.9		31	30	2457.82
																					32	31	7911.63	7009.41		32	31	5405.81	5430.47								32	31	7977.69	8648.35		32	31	7376.36	7509.6
																					33	32	8076.52	7194.26		33	32	5609.25	5460.58								33	32	7481.76	8621.02		33	32	7968.47	8259.34
																					34	33	8567.15	7628.23		34	33	5671.45	5597.39								34	33	7310.18	8127.64		34	33	8104.61	8155.06
																					35	34	9177.92	8590.95													35	34	7084.5	7716.85		35	34	7994.91	7541.2
																					36	35	9005.11	9096.04													36	35	7725.86	8780.5		36	35	7218.27	6937.11
																					37	36	6505.9	6802.31													37	36	8478.69	9488.93
																					38	37	6869.77	7315.97													38	37	8426.26	9601.68
																					39	38	6745.91	7321.19													39	38	8132.7	8876.28
																					40	39	6590.62	6840.35													40	39	7090.36	7239.59
[truncated: 313 more columns]

## Sheet: Snf7-GFP_pl.acc.
Images: 211202_6272_SNF7-GFP_1_			Strain yYB17438
3 rows for each cell, first is GFP intensity around plasmid accumulation, second is GFP intensity at rest of nuclear rim, third is cytoplasmid background (background not subtracted in this analysis)
											Clone2
	Area	Mean	StdDev	Min	Max	IntDen	RawIntDen	Length	Ratio		Ratio
1	0.934	26.844	8.598	14.817	53.881	25.069	1530.08	2.297	0.997918		0.451988
2	0.934	26.9	7.079	13.776	42.585	25.122	1533.31	2.289
3	0.737	16.426	4.525	9.701	28.967	12.11	739.148	1.792
4	0.492	17.376	6.99	8.494	36.093	8.54	521.27	1.149	0.859092		1.52484
5	1.278	20.226	10.932	1.227	56.208	25.848	1577.64	3.177
6	0.737	15.832	4.447	5.203	25.196	11.673	712.455	1.792
7	0.885	16.03	10.448	0.65	66.485	14.182	865.605	2.162	0.281846		1.24503
8	1.229	56.875	45.995	6.222	174.098	69.888	4265.6	3.06
9	0.983	37.35	16.816	10	76.5	36.717	2241	2.432
10	1.081	29.881	8.735	14.738	52.205	32.312	1972.15	2.679	1.58193		1.19815
11	1.278	18.889	5.617	3.127	30.448	24.139	1473.34	3.193
12	1.081	23.122	9.636	11.277	54.512	25.003	1526.06	2.688
13	0.639	11.515	9.853	0.941	44.842	7.358	449.069	1.53	0.966348		0.171894
14	1.032	11.916	5.815	0.906	33.118	12.3	750.709	2.552
15	1.032	19.713	14.236	2.947	65.01	20.348	1241.92	2.56
16	0.541	38.58	13.035	15.369	61.961	20.859	1273.15	1.272	1.6369		0.56758
17	0.885	23.569	16.927	0.546	71.53	20.852	1272.73	2.167
18	1.081	20.232	10.263	0	40.821	21.878	1335.31	2.688
19	0.786	16.644	2.997	10.053	23.756	13.089	798.911	1.908	1.07256		0.381762
20	0.836	15.518	3.698	7.177	22.362	12.967	791.416	2.043
21	0.688	15.64	4.027	9.724	24.787	10.762	656.861	1.664
22	1.13	20.328	7.555	6.015	36.72	22.981	1402.64	2.809	0.605036		1.08087
23	1.13	33.598	19.093	9.193	83.404	37.982	2318.24	2.807
24	1.229	26.319	9.856	10.913	52.013	32.34	1973.9	3.072
25	0.885	16.313	8.398	1.196	36.22	14.433	880.904	2.164	0.773128		0.883462
26	0.934	21.1	4.957	10.804	30.176	19.705	1202.72	2.274
27	1.032	24.173	10.723	7.464	52.563	24.951	1522.89	2.56
28	0.934	16.769	6.93	6.676	35.044	15.661	955.853	2.291	0.614632		1.10474
29	0.786	27.283	5.483	18.222	38.731	21.456	1309.56	1.889
30	0.836	22.205	12.518	2.358	52.411	18.554	1132.46	2.048
31	0.836	8.129	3.643	0.995	15.464	6.792	414.563	2.043	0.487233		0.404678
32	0.934	16.684	11.264	0.031	44.261	15.581	950.996	2.295
33	0.836	40.599	18.876	2.718	81.546	33.923	2070.53	2.048
34	0.983	35.318	17.282	1.584	71.259	34.719	2119.09	2.42	2.56187		1.10932
35	0.885	13.786	5.365	1.356	26.131	12.197	744.455	2.173
36	0.885	28.263	19.301	3.374	72.621	25.005	1526.21	2.176
37	0.688	20.339	8.632	2.708	36.226	13.996	854.223	1.659	1.34865		1.18189
38	1.13	15.081	6.634	2.892	35.464	17.049	1040.58	2.794
39	0.836	45.949	10.792	26.429	72.273	38.394	2343.38	2.048
40	0.885	7.236	3.721	2.641	17.282	6.402	390.74	2.17	0.55224		1.02174
41	0.885	13.103	5.055	3.803	24.342	11.593	707.573	2.168
42	0.737	19.666	12.588	1.478	54.432	14.499	884.957	1.792
43	0.737	42.859	9.437	20.654	57.942	31.599	1928.66	1.78	1.59197		0.876196
44	1.278	26.922	7.506	13.951	47.866	34.405	2099.92	3.193
45	1.327	15.52	8.455	1.117	49.459	20.596	1257.09	3.328
46	0.59	8.588	4.354	0.06	18.916	5.065	309.152	1.397	0.547111		0.854469
47	1.229	15.697	8.189	3.601	41.383	19.289	1177.3	3.065
48	1.13	35.213	16.554	7.266	74.848	39.808	2429.7	2.816
49	0.836	23.571	15.774	0.194	59.93	19.696	1202.13	2.04	3.5915		1.19294
50	0.786	6.563	3.689	0	14.25	5.161	315.004	1.915
51	0.786	40.928	17.601	8.717	70.442	32.187	1964.56	1.92
52	0.983	13.732	10.651	2.594	38.757	13.499	823.934	2.426	1.38861		1.0457
53	1.13	9.889	4.115	1.663	22.354	11.179	682.316	2.808
54	0.836	14.02	5.011	5	33.5	11.715	715	2.048
55	0.59	25.937	11.134	10.372	58.058	15.298	933.722	1.402	2.24543		0.776107
56	1.327	11.551	4.933	1.249	24.116	15.329	935.619	3.314
57	1.081	40.854	15.722	10.015	79.48	44.178	2696.39	2.688
58	0.737	18.6	6.567	7.374	34.651	13.714	837.006	1.783	1.36025		0.53343
59	1.032	13.674	3.909	3.511	22.196	14.114	861.468	2.526
60	0.639	16.666	6.899	6.022	29.9	10.649	649.961	1.536
61	0.836	15.177	8.49	0	45.55	12.682	774.048	2.039	1.462		0.579475
62	1.327	10.381	3.824	2.8	23.256	13.776	840.827	3.301
63	0.786	24.72	11.014	9.843	53.559	19.441	1186.56	1.92
64	0.688	23.221	8.14	11.027	46.561	15.979	975.278	1.658	1.30163		0.96573
65	1.278	17.84	10.039	4.718	58.908	22.799	1391.53	3.192
66	0.737	17.796	4.175	8.394	26.458	13.121	800.83	1.792
67	0.934	22.777	13.505	7.53	57.69	21.271	1298.29	2.298	1.06112		1.11358
68	1.229	21.465	6.113	9.749	35.122	26.377	1609.9	3.058
69	0.885	34.148	11.118	15.186	58.69	30.212	1844	2.176
70	0.786	38.699	11.416	16.565	61.423	30.434	1857.56	1.905	2.49784		0.938358
71	1.769	15.493	10.331	0.41	49.187	27.415	1673.3	4.472
72	0.786	28.508	15.176	8.569	61.819	22.419	1368.36	1.92
73	1.229	25.429	12.822	8.069	60.76	31.247	1907.14	3.067	1.1621		2.14159
74	1.72	21.882	15.648	0.204	64.62	37.645	2297.65	4.343
75	0.786	19.149	7.605	8.005	34.146	15.059	919.147	1.92
76	0.492	10.305	4.368	1.281	18.245	5.065	309.149	1.147	0.674411		4.16469
77	1.573	15.28	10.82	0.06	52.627	24.034	1466.91	3.959
78	0.688	27.737	9.276	14.661	53.474	19.087	1164.97	1.664
79	0.885	18.921	6.097	8.628	38.13	16.74	1021.75	2.168	1.12284		1.99121
80	1.622	16.851	6.633	5.44	36.74	27.332	1668.24	4.089
81	0.786	11.127	7.113	1.476	43.523	8.75	534.074	1.92
82	0.737	9.857	6.543	0.834	27.663	7.267	443.545	1.785	0.524923		0.966253
83	1.327	18.778	8.717	2.225	43.287	24.92	1521.03	3.316
84	0.59	29.465	10.053	10.822	50.878	17.379	1060.74	1.408
85	0.885	21.364	8.088	7.035	40.554	18.901	1153.63	2.168	1.25538		2.68052
86	1.229	17.018	8.137	4.193	42.404	20.911	1276.32	3.064
87	0.836	12.057	5.663	3.545	28.78	10.075	614.921	2.048
88	0.836	7.26	4.748	0	21.589	6.066	370.235	2.043	0.557347		1.62511
89	1.622	13.026	5.942	0.058	26.687	21.128	1289.57	4.086
90	0.688	15.452	8.423	1.822	33.743	10.633	649	1.664
											0.603429
								Av. RA	1.22279		1.14119
								Med. RA	1.0977		1.02174

## Sheet: Vps4-GFP_pl.acc.
Images: 211202_6272_VPS4-GFP_1_			Strain yYB17374								Images: 211202_6272_VPS4-GFP_2_
3 rows for each cell, first is GFP intensity around plasmid accumulation, second is GFP intensity at rest of nuclear rim, third is cytoplasmid background (background not subtracted in this analysis)
	Area	Mean	StdDev	Min	Max	IntDen	RawIntDen	Length	Ratio			Area	Mean	StdDev	Min	Max	IntDen	RawIntDen	Length	Ratio
1	0.688	7.633	5.189	0.388	23.393	5.253	320.606	1.659	0.795187		1	0.885	9.647	4.775	0.133	18.164	8.535	520.931	2.066	0.998551
2	1.475	9.599	4.821	0.398	25.927	14.154	863.921	3.696			2	0.934	9.661	5.288	0	22.524	9.022	550.654	2.297
3	0.786	8.286	3.152	0.868	17.813	6.516	397.727	1.92			3	0.688	12.046	4.981	0.071	20.319	8.289	505.913	1.664
4	0.836	16.262	4.354	6.928	27.274	13.588	829.342	2.04	0.935889		4	0.442	7.646	3.914	1.107	14.82	3.382	206.429	1.018	0.846265
5	0.639	17.376	3.396	10.534	23.634	11.103	677.657	1.527			5	1.327	9.035	3.382	2.574	20.011	11.991	731.873	3.322
6	0.786	20.885	12.31	0.208	48.394	16.425	1002.5	1.92			6	0.688	21.817	12.566	3.817	46.416	15.013	916.309	1.664
7	0.885	10.784	4.575	2.697	22.484	9.541	582.324	2.168	0.966135		7	0.934	9.069	3.878	1.314	16.889	8.469	516.928	2.297	0.972338
8	0.639	11.162	3.914	2.057	18.956	7.132	435.319	1.525			8	1.327	9.327	3.492	0.922	17.063	12.377	755.456	3.318
9	1.032	9.728	3.403	2.9	18.32	10.041	612.88	2.56			9	0.737	3.651	2.503	0.081	9.861	2.692	164.279	1.792
10	0.885	8.43	5.992	0.022	29.947	7.458	455.204	2.169	0.219274		10	0.934	16.957	8.06	5.773	55.646	15.836	966.56	2.296	1.77504
11	0.983	38.445	35.082	6.919	141.536	37.793	2306.7	2.413			11	0.59	9.553	3.979	2.912	18.375	5.635	343.925	1.406
12	1.425	6.149	4.093	0.014	19.964	8.765	534.994	3.584			12	0.688	16.451	8.376	7.333	53.954	11.32	690.945	1.664
13	0.492	14.023	3.36	8.389	22.063	6.893	420.692	1.148	1.07201		13	0.885	24.438	27.95	1.459	125.655	21.621	1319.64	2.17	2.26215
14	1.524	13.081	6.91	0.267	47.325	19.932	1216.53	3.831			14	1.032	10.803	5.458	1.315	27.699	11.151	680.598	2.55
15	1.032	19.665	8.758	8.247	52.977	20.298	1238.88	2.56			15	1.032	7.31	4.642	0.038	16.095	7.545	460.505	2.56
16	0.59	10.597	4.361	3.068	22.226	6.25	381.484	1.403	0.708308		16	0.541	7.64	2.467	3.245	14.495	4.131	252.127	1.27	0.672535
17	1.032	14.961	12.511	4.497	61.164	15.443	942.569	2.553			17	0.983	11.36	5.293	3.796	22.697	11.168	681.612	2.424
18	0.983	17.809	12.666	1.059	48.943	17.507	1068.55	2.432			18	0.59	8.471	4.963	1.667	21.142	4.996	304.949	1.408
19	0.541	8.694	4.084	0	16.594	4.701	286.904	1.273	1.11347		19	0.934	10.005	7.451	1.301	36.627	9.344	570.302	2.293	1.13025
20	0.934	7.808	3.4	0.93	15.083	7.292	445.05	2.29			20	1.327	8.852	2.644	2.416	16.248	11.748	717.016	3.316
21	0.541	6.903	3.2	0.278	13.574	3.732	227.799	1.28			21	0.688	8.734	3.415	1.289	16.316	6.01	366.847	1.664
22	0.59	15.885	5.719	5.822	28.364	9.37	571.87	1.408	1.33029		22	0.885	8.891	8.999	0.575	40.777	7.866	480.098	2.172	1.80053
23	1.917	11.941	5.883	0.615	33.373	22.89	1397.07	4.848			23	0.934	4.938	2.894	0	13.076	4.612	281.476	2.3
24	1.081	8.122	8.012	0	48.398	8.783	536.067	2.688			24	0.639	10.775	4.209	4.192	17.835	6.885	420.244	1.536
25	0.836	9.36	3.674	1.474	25.793	7.821	477.339	2.038	1.09551		25	0.541	8.472	3.319	1.145	15.531	4.581	279.573	1.275	0.994483
26	0.688	8.544	3.609	1.717	16.09	5.879	358.844	1.656			26	2.015	8.519	4.95	0	21.224	17.167	1047.8	5.103
27	0.934	18.065	14.38	3.53	80.178	16.871	1029.71	2.304			27	0.737	6.175	4.127	0.445	16.213	4.553	277.865	1.792
28	0.786	10.012	4.074	1.377	21.164	7.873	480.56	1.916	0.795045		28	0.885	10.962	3.416	4.051	20.285	9.699	591.951	2.17	1.07724
29	1.868	12.593	3.417	3.847	21.286	23.52	1435.58	4.726			29	1.327	10.176	3.948	1.504	17.005	13.505	824.268	3.317
30	0.885	9.64	5.398	0.765	21.782	8.529	520.543	2.176			30	1.081	17.249	11.836	2.302	53.616	18.652	1138.4	2.688
31	0.737	13.353	4.646	4.624	24.506	9.845	600.886	1.787	1.5437		31	0.59	10.116	4.848	3.18	22.587	5.967	364.174	1.401	0.817322
32	1.18	8.65	5.026	0.139	21.447	10.204	622.81	2.928			32	0.983	12.377	5.461	2.545	22.695	12.167	742.627	2.426
33	0.59	11.528	4.893	1	18	6.799	415	1.408			33	0.688	13.352	5.775	3.482	26.705	9.188	560.773	1.664
34	1.376	11.699	3.701	3.932	22.761	16.101	982.757	3.448	0.909932		34	1.081	10.188	3.996	1.755	17.342	11.017	672.398	2.68	1.14151
35	2.458	12.857	6.029	0	29.978	31.596	1928.49	6.266			35	0.737	8.925	4.639	0.166	18.732	6.581	401.647	1.787
36	0.983	12.356	4.434	3.136	22.805	12.147	741.386	2.432			36	0.737	9.011	4.285	0.201	18.31	6.644	405.49	1.792
37	0.737	10.462	5.004	0.169	20.393	7.714	470.806	1.787	1.03013		37	0.836	10.484	4.912	1.08	23.865	8.76	534.687	2.033	1.33588
38	0.737	10.156	3.867	2.392	19.383	7.488	457.01	1.788			38	1.376	7.848	5.73	0.146	28.856	10.801	659.233	3.436
39	0.836	11.272	4.899	3.383	21.328	9.419	574.884	2.048			39	1.081	13.765	13.77	0.352	57.067	14.885	908.509	2.688
40	0.541	5.813	3.622	0.439	14.421	3.143	191.845	1.278	0.606026		40	0.934	7.017	3.375	0.334	13.629	6.553	399.984	2.293	0.895711
41	1.327	9.592	3.893	0.999	19.112	12.73	776.954	3.323			41	1.278	7.834	3.83	1.156	19.159	10.011	611.035	3.193
42	0.934	10.23	5.028	0.585	22.5	9.554	583.115	2.304			42	0.934	6.501	3.628	0.01	13.84	6.072	370.583	2.304
43	1.278	11.516	3.008	4.337	17.864	14.717	898.227	3.196	1.00559		43	0.983	8.346	3.268	1.451	16.68	8.204	500.746	2.424	0.657269
44	1.081	11.452	3.995	3.389	21.763	12.384	755.847	2.678			44	0.836	12.698	5.12	0.246	22.645	10.61	647.582	2.04
45	1.18	10.751	4.964	1.136	27.282	12.683	774.089	2.944			45	0.836	8.057	3.755	0.126	14.432	6.732	410.903	2.048
46	0.934	11.494	2.652	4.329	17.167	10.734	655.15	2.294	1.06544		46	0.541	6.204	4.541	0.204	14.926	3.354	204.74	1.271	0.837925
47	1.18	10.788	3.619	4.389	18.482	12.726	776.714	2.932			47	1.13	7.404	4.601	0.159	21.291	8.37	510.857	2.804
48	0.786	7.085	6.222	0.088	25.53	5.572	340.099	1.92			48	0.541	22.886	7.338	5.947	41.296	12.374	755.24	1.28
49	0.836	13.301	4.99	2.75	22.719	11.114	678.33	2.035	1.23822		49	0.59	14.498	3.31	5.635	21.484	8.552	521.944	1.4	0.969896
50	1.327	10.742	5.497	1.632	31.577	14.256	870.101	3.315			50	0.983	14.948	3.994	7.715	26.004	14.695	896.9	2.423
51	0.934	10.256	4.956	1.376	22.218	9.578	584.584	2.304			51	0.737	14.076	4.309	5.805	22.893	10.378	633.423	1.792
52	1.475	11.222	8.524	0.074	46.783	16.547	1009.94	3.709	1.28193		52	0.541	11.632	4.251	4.843	23.904	6.289	383.849	1.273	1.4982
53	2.064	8.754	3.824	0	20.345	18.071	1102.95	5.24			53	1.425	7.764	4.162	0.013	18.188	11.067	675.487	3.579
54	0.983	93.027	6.628	76.914	112.027	91.449	5581.61	2.432			54	0.688	14.325	5.343	3.518	25.815	9.857	601.648	1.664
55	0.541	9.778	2.853	3.627	15.287	5.287	322.673	1.28	0.961077		55	0.885	9.249	7.636	0.658	39	8.183	499.464	2.172	1.22471
56	2.064	10.174	4.046	0.2	19.907	21.003	1281.91	5.241			56	1.18	7.552	3.465	1.594	14.268	8.909	543.745	2.938
57	0.934	11.939	4.852	1	23	11.149	680.5	2.304			57	0.934	7.656	5.023	0.018	26.16	7.15	436.389	2.304
58	1.081	17.329	10.059	1.533	59.783	18.738	1143.69	2.678	0.859531		58	0.983	19.431	16.244	0.101	55.524	19.102	1165.88	2.427	1.43912
59	0.934	20.161	22.932	2.432	86.339	18.828	1149.19	2.289			59	1.032	13.502	7.888	2.576	30.386	13.937	850.637	2.552
60	1.081	18.659	16.003	4.205	85.126	20.177	1231.53	2.688			60	0.639	6.315	4.34	0	17.274	4.035	246.275	1.536
61	0.934	14.53	5.423	0.51	24.586	13.569	828.214	2.299	1.53448		61	0.639	8.402	3.899	1.257	16.124	5.369	327.677	1.529	0.690954
62	1.376	9.469	3.944	2.115	19.218	13.031	795.359	3.418			62	0.688	12.16	5.027	4.796	27.165	8.368	510.724	1.656
63	0.639	10.085	5.086	0.243	20.14	6.444	393.323	1.536			63	1.18	8.092	3.766	0.51	16.455	9.546	582.612	2.944
64	0.688	22.321	26.459	1.111	101.752	15.359	937.466	1.656	2.25624		64	0.639	9.603	5.425	0.942	18.944	6.136	374.508	1.53	1.13524
65	1.081	9.893	7.94	0.042	35.817	10.698	652.924	2.674			65	1.327	8.459	3.616	0.32	16.084	11.226	685.179	3.289
66	0.934	28.761	21.124	0.187	81.124	26.86	1639.38	2.304			66	0.885	10.536	6.677	0.469	30.509	9.321	568.933	2.176
67	0.737	21.297	6.649	10.07	40.877	15.702	958.354	1.785	2.07654		67	0.737	16.127	6.368	2.522	28.198	11.89	725.698	1.784	0.949988
68	0.737	10.256	5.631	1.306	26.086	7.562	461.525	1.785			68	0.836	16.976	3.904	7.214	25.682	14.185	865.801	2.041
69	0.786	9.667	4.99	0	17.5	7.602	464	1.92			69	0.885	7.649	4.908	1.017	18.992	6.768	413.064	2.176
70	0.639	10.572	2.472	4.942	14.569	6.756	412.326	1.53	0.65939		70	0.541	6.536	3.777	1.456	13.6	3.534	215.68	1.273	0.899037
71	1.425	16.033	8.822	2.8	38.484	22.853	1394.83	3.58			71	0.934	7.27	3.686	0	15.822	6.79	414.414	2.295
72	0.983	13.014	5.746	4.374	27.572	12.793	780.824	2.432			72	0.786	7.297	4.251	0.198	17.205	5.738	350.245	1.92
73	0.59	16.928	4.009	7.484	24.908	9.985	609.412	1.404	1.18776		73	0.688	14.722	7.409	2.598	28.884	10.13	618.306	1.656	1.4271
74	1.622	14.252	4.429	6.902	25.801	23.117	1410.96	4.071			74	1.032	10.316	3.769	0.283	20.955	10.649	649.936	2.545
75	0.934	12.299	4.603	2.558	23.604	11.486	701.071	2.304			75	0.836	16.892	6.686	7.195	32.355	14.114	861.48	2.048
76	0.934	7.683	4.413	0	18.352	7.175	437.934	2.301	0.360281		76	0.541	4.628	3.22	0.678	15.021	2.502	152.719	1.269	0.394074
77	1.327	21.325	22.468	0.907	96.692	28.301	1727.34	3.323			77	1.278	11.744	9.683	0.404	46.305	15.008	916.023	3.194
78	0.737	7.495	3.209	0.511	13.48	5.526	337.269	1.792			78	0.737	19.532	10.19	4.723	42.937	14.401	878.957	1.792
79	0.786	12.288	6.289	0.516	26.329	9.664	589.842	1.915	0.801095		79	0.541	7.191	3.456	1.603	14.402	3.888	237.298	1.277	0.495043
80	1.13	15.339	6.7	2.151	28.277	17.34	1058.36	2.809			80	1.13	14.526	10.471	1.828	48.496	16.421	1002.29	2.809
81	0.786	10.444	6.758	0.341	26.672	8.213	501.291	1.92			81	0.885	18.957	18.786	3.172	83.914	16.772	1023.67	2.176
82	1.13	14.285	5.461	4.261	25.796	16.149	985.646	2.806	1.18263		82	0.836	8.912	6.075	0.425	30.427	7.447	454.498	2.043	1.03184
83	1.081	12.079	4.171	2.391	24.826	13.062	797.217	2.68			83	1.278	8.637	5.259	1.179	23.314	11.038	673.677	3.19
84	0.836	12.842	5.074	4.161	25.584	10.73	654.925	2.048			84	0.934	11.231	4.661	2.879	21.573	10.489	640.169	2.304
85	0.688	9.277	3.78	3.384	18.2	6.383	389.618	1.653	1.03886		85	0.492	4.356	3.116	0.005	11.361	2.141	130.674	1.146	0.468942
86	1.278	8.93	3.554	2.005	19.118	11.412	696.518	3.193			86	1.327	9.289	4.456	0.058	18.935	12.327	752.405	3.321
87	0.786	16.626	12.401	3.315	60.966	13.075	798.047	1.92			87	0.737	8.533	6.091	0	23.351	6.291	383.963	1.792
88	0.492	11.398	4.417	4.329	21.595	5.602	341.927	1.15	1.04896		88	0.737	11.443	5.533	0.48	21.487	8.437	514.944	1.786	0.981305
89	1.229	10.866	4.341	2.649	27.404	13.352	814.917	3.066			89	2.507	11.661	4.943	0.219	26.237	29.232	1784.2	6.393
90	1.081	9.078	4.268	0.007	20.077	9.817	599.152	2.688			90	0.786	11.602	5.373	3.105	26.658	9.124	556.888	1.92
								Av. RA	1.05596										Av. RA	1.06068
								Med. RA	1.03449										Med. RA	0.987894

## Sheet: Snf7-GFP_Net1-mCh
Single focal plane	Strain yYB17312		Single plane imaging
Background substracted			0h										24h
			mean				Net1/Nuclear	Net1/Cytoplasmic	Nuclear/Cytoplasmic				mean				Net1/Nuclear	Net1/Cytoplasmic	Nuclear/Cytoplasmic
Next to Net1	1	30	1279.05	939.63	1591.1	8.999	1.23984	1.17278	0.945909	Next to Net1	1	60	2290.06	1349.08	4971.85	18.99	1.46198	0.620051	0.424117
Around Nucleus	2	42	1031.62	835.98	1224.05	12.987				Around Nucleus	2	78	1566.41	908.317	2507.77	25.014
Cytoplasmic line	3	45	1090.61	588.64	1441	14.006				Cytoplasmic line	3	69	3693.34	1223.78	9751.85	21.987
Next to Net1	1	30	1125.24	812.963	1471.72	8.998	0.794865	0.989772	1.24521	Next to Net1	1	39	2053.8	872.4	3562.72	12.005	1.17607	0.782098	0.66501
Around Nucleus	2	45	1415.63	917.538	1953.24	13.985				Around Nucleus	2	60	1746.33	1200.17	2803.55	18.977
Cytoplasmic line	3	63	1136.87	545.493	1643.72	20.002				Cytoplasmic line	3	75	2626.02	1003.91	5649.96	24.013
Next to Net1	1	21	562.42	382.469	691.049	5.997	0.859272	0.703579	0.818809	Next to Net1	1	24	1443.93	1043	1855.91	7	0.490054	0.46269	0.94416
Around Nucleus	2	72	654.531	411.684	1062.39	23.005				Around Nucleus	2	117	2946.47	1034.24	7240.45	37.98
Cytoplasmic line	3	66	799.37	339.342	3264.03	20.989				Cytoplasmic line	3	96	3120.73	1017.23	7980.84	30.998
Next to Net1	1	27	681.934	430.91	917.127	7.994	0.656183	0.438882	0.668841	Next to Net1	1	27	3513.12	1287.48	11232.8	7.993	2.29208	1.10375	0.481549
Around Nucleus	2	45	1039.24	400.103	2391.69	14.004				Around Nucleus	2	78	1532.72	846.601	2681.49	24.995
Cytoplasmic line	3	45	1553.8	630.223	2973.73	14.008				Cytoplasmic line	3	78	3182.89	740.453	11836	25.016
Next to Net1	1	21	575.718	359.383	710.58	5.998	0.52137	0.313472	0.601247	Next to Net1	1	45	1396.34	1026.89	2334.79	13.985	0.895854	0.6349	0.708709
Around Nucleus	2	48	1104.24	519.273	2893.79	14.975				Around Nucleus	2	87	1558.66	945.453	2266.14	28.013
Cytoplasmic line	3	57	1836.58	392.582	3898.42	17.996				Cytoplasmic line	3	78	2199.3	495.361	11578.2	25.007
Next to Net1	1	39	770.005	390.227	996.596	12.018	0.668313	0.602357	0.90131	Next to Net1	1	21	2775.55	2433.23	3182.26	5.999	1.24717	1.07202	0.859562
Around Nucleus	2	54	1152.16	623.18	1485.51	17				Around Nucleus	2	93	2225.48	993.55	3670.23	29.982
Cytoplasmic line	3	51	1278.32	722.481	1850.05	16.015				Cytoplasmic line	3	63	2589.09	1561.78	3769.73	19.981
Next to Net1	1	33	1959.15	930.62	3818.63	9.995	0.778151	0.781068	1.00375	Next to Net1	1	36	6996.94	5764.06	8308.66	10.991	1.16408	1.18303	1.01628
Around Nucleus	2	51	2517.7	1030.22	5745.25	16.002				Around Nucleus	2	72	6010.7	4365.88	8432.1	22.994
Cytoplasmic line	3	57	2508.3	721.962	6214.98	18.003				Cytoplasmic line	3	42	5914.4	4692.25	7404.76	13.001
Next to Net1	1	30	526.406	246.498	762.024	9.019	0.485621	0.348227	0.717074	Next to Net1	1	48	2716.95	1822.55	4150.69	15.017	0.821154	0.651125	0.792939
Around Nucleus	2	36	1083.98	607.01	2559.89	11.011				Around Nucleus	2	60	3308.7	1928.65	5798.06	19.006
Cytoplasmic line	3	36	1511.68	463.004	4255.15	11.002				Cytoplasmic line	3	60	4172.7	2791.77	13861.8	19.023
Next to Net1	1	45	830.19	479.326	1280.64	13.979	0.703062	0.670365	0.953494	Next to Net1	1	24	3386.38	2671.46	5718.66	6.997	0.954489	0.994089	1.04149
Around Nucleus	2	33	1180.82	759.657	1571.8	9.999				Around Nucleus	2	36	3547.85	2459.68	4866.6	10.999
Cytoplasmic line	3	45	1238.41	776.733	1677.28	14.006				Cytoplasmic line	3	60	3406.52	2187.49	6511.98	19.002
Next to Net1	1	27	1482.12	935.061	1988.38	8.008	1.79941	1.43998	0.800253	Next to Net1	1	24	4741.54	2209.19	10211.1	6.993	0.871919	0.813007	0.932435
Around Nucleus	2	63	823.667	484.577	1380.63	19.976				Around Nucleus	2	48	5438.06	3967.16	9255.17	15.007
Cytoplasmic line	3	60	1029.26	374.71	2182.28	19.002				Cytoplasmic line	3	69	5832.11	2913.83	11103.5	21.993
Next to Net1	1	36	892.58	396.27	1429.89	10.997	1.15608	0.794554	0.687285	Next to Net1	1	21	3033.73	2445.86	4033.27	5.997	0.985539	0.900792	0.914009
Around Nucleus	2	42	772.077	589.013	1117.87	12.993				Around Nucleus	2	51	3078.24	1893.59	4648.74	16.012
Cytoplasmic line	3	57	1123.37	537.371	3241.86	18.006				Cytoplasmic line	3	81	3367.84	1945.93	7821.44	25.99
Next to Net1	1	21	1108.18	856.352	1486.1	6.014	1.12947	1.21421	1.07503	Next to Net1	1	33	1281.36	634.702	2726.74	9.987	0.742444	0.670529	0.903137
Around Nucleus	2	90	981.158	632.049	1416.82	29.006				Around Nucleus	2	84	1725.87	607.771	4340	26.999
Cytoplasmic line	3	45	912.68	683.315	1147.6	14.006				Cytoplasmic line	3	81	1910.97	677.99	6287.47	25.985
Next to Net1	1	39	740.424	519.958	1000.61	12.02	0.891242	0.851633	0.955558	Next to Net1	1	36	2205.08	1500.65	3124.93	10.981	0.750311	0.781674	1.0418
Around Nucleus	2	54	830.778	531.604	1105.61	16.994				Around Nucleus	2	99	2938.89	2015.94	5650.38	31.987
Cytoplasmic line	3	54	869.417	513.735	1304.86	16.999				Cytoplasmic line	3	66	2820.97	1753.96	5640.61	21.01
Next to Net1	1	30	1010.49	676.187	1449.06	8.993	1.44151	1.02684	0.712339	Next to Net1	1	60	1595.44	505.736	4261.61	18.979	0.650627	0.371863	0.571546
Around Nucleus	2	81	700.994	359.535	1282.58	26.012				Around Nucleus	2	78	2452.16	430.753	8252.26	24.99
Cytoplasmic line	3	45	984.073	439.961	1620.15	14.008				Cytoplasmic line	3	69	4290.4	761.615	11400.1	21.987
Next to Net1	1	36	1610.16	996.261	3452.47	10.991	1.66595	1.58613	0.952093	Next to Net1	1	75	1423.7	775.847	3026.96	24.024	0.480216	0.386377	0.804589
Around Nucleus	2	72	966.514	534.568	2086.92	22.995				Around Nucleus	2	96	2964.71	507.053	11976.3	31.014
Cytoplasmic line	3	51	1015.15	554.469	2029.6	15.983				Cytoplasmic line	3	72	3684.75	669.174	14860.8	22.993
Next to Net1	1	33	1417.11	900.259	2398.92	10.013	1.77456	1.29562	0.73011	Next to Net1	1	36	3745.16	2528.99	5109.53	11.005	1.23982	0.897369	0.723793
Around Nucleus	2	99	798.572	453.747	2515.91	32.009				Around Nucleus	2	144	3020.74	1467.98	7327.73	47.014
Cytoplasmic line	3	60	1093.77	555.071	2270.68	18.985				Cytoplasmic line	3	78	4173.49	1258.64	9102.58	25.008
Next to Net1	1	24	1951.37	1557.05	2503.48	7.002	0.472913	0.536977	1.13547	Next to Net1	1	54	3435.75	2161.04	5217.96	16.988	1.06845	0.982891	0.919921
Around Nucleus	2	39	4126.28	2255.07	6976.51	11.988				Around Nucleus	2	126	3215.64	703.237	7411.38	40.978
Cytoplasmic line	3	42	3634	2002.51	6807.03	12.981				Cytoplasmic line	3	72	3495.55	2131.11	5962.47	23.005
Next to Net1	1	15	903.74	691.791	1087.98	3.999	0.416154	0.408779	0.982278	Next to Net1	1	33	2811.46	2029.67	4727.35	9.994	0.552301	0.590064	1.06838
Around Nucleus	2	72	2171.65	724.559	7079.77	22.987				Around Nucleus	2	108	5090.45	3337.92	12079.6	34.989
Cytoplasmic line	3	48	2210.83	842.398	6750.1	15.006				Cytoplasmic line	3	75	4764.67	1702.74	11927.4	24.013
Next to Net1	1	21	937.78	736.198	1130.77	5.982	0.552596	0.62723	1.13506	Next to Net1	1	45	3940.78	1923.08	6495.13	14.009	1.07045	0.839416	0.78417
Around Nucleus	2	60	1697.04	687.745	4210.92	19.008				Around Nucleus	2	66	3681.42	1539.13	7544.32	20.979
Cytoplasmic line	3	69	1495.11	573.21	3626.05	22.019				Cytoplasmic line	3	57	4694.67	1865.24	6554.18	18.012
Next to Net1	1	27	603.74	458.925	773.882	8.025	0.514668	0.475593	0.924076	Next to Net1	1	39	3697.32	2991.58	5212.29	12.026	0.7278	0.681304	0.936115
Around Nucleus	2	84	1173.07	418.684	2785.52	26.996				Around Nucleus	2	96	5080.13	2643.4	11125.2	30.978
Cytoplasmic line	3	48	1269.45	573.555	2645.94	15.007				Cytoplasmic line	3	54	5426.82	2340.18	12208.1	17.016
Next to Net1	1	18	834.281	657.896	990.74	4.987	0.838287	0.579562	0.691365	Next to Net1	1	39	2764.99	845.4	5534.55	12.01	1.6145	1.05985	0.656458
Around Nucleus	2	48	995.221	653.828	1905.54	14.99				Around Nucleus	2	30	1712.61	946.581	2529.75	9.015
Cytoplasmic line	3	63	1439.5	814.063	3060.7	19.991				Cytoplasmic line	3	78	2608.86	847.854	6138.29	24.972
Next to Net1	1	30	834.973	634.302	1169.81	8.996	1.09092	0.851939	0.780938	Next to Net1	1	45	3843.4	2410.22	5137.57	14.001	0.956239	0.685226	0.716584
Around Nucleus	2	57	765.386	534.77	925.027	18.004				Around Nucleus	2	75	4019.28	1025.62	7674.91	24.002
Cytoplasmic line	3	48	980.085	463.295	1428.56	15.007				Cytoplasmic line	3	48	5608.95	3175.18	10649.9	14.978
Next to Net1	1	24	651.648	508.721	853.305	7.002	0.861158	0.506686	0.588377	Next to Net1	1	30	2255.2	491.465	6022.59	9.007	0.550357	1.73802	3.158
Around Nucleus	2	45	756.711	497.02	1094.35	14.012				Around Nucleus	2	57	4097.7	562.981	8453.89	17.997
Cytoplasmic line	3	36	1286.1	748.557	1666.74	11.002				Cytoplasmic line	3	66	1297.56	370.8	2804.58	20.984
Next to Net1	1	36	711.355	504.925	950.689	11.004	0.92816	0.474849	0.511602	Next to Net1	1	33	1488.49	889.806	2169.82	10	0.652781	0.572839	0.877536
Around Nucleus	2	57	766.414	494.828	1296.01	18.019				Around Nucleus	2	105	2280.23	1160.88	3439.7	34.003
Cytoplasmic line	3	60	1498.07	526.081	6019.8	19.002				Cytoplasmic line	3	69	2598.45	998.173	4894.11	21.975
Next to Net1	1	18	931.622	628.148	1177.11	4.985	0.815908	0.900522	1.10371	Next to Net1	1	15	3697.29	2816.57	4544.62	3.993	0.808729	0.872867	1.07931
Around Nucleus	2	60	1141.82	623.513	2989.18	19.007				Around Nucleus	2	84	4571.73	1765.01	9220.89	27.006
Cytoplasmic line	3	48	1034.54	445.397	1437.22	15				Cytoplasmic line	3	51	4235.8	2197.15	6938.69	15.996
Next to Net1	1	18	1169.89	744.058	2145.17	5	1.53908	0.793729	0.515716	Next to Net1	1	24	2781.05	1429.87	4253.9	7.006	2.87569	0.642514	0.223429
Around Nucleus	2	51	760.123	529.371	1054.75	16.011				Around Nucleus	2	75	967.09	663.02	1688.76	24.016
Cytoplasmic line	3	57	1473.92	455.819	3672.52	18.025				Cytoplasmic line	3	63	4328.4	1211.41	12539.2	20.009
Next to Net1	1	21	920.832	456.735	2265.92	6.021	1.16794	0.996205	0.852957	Next to Net1	1	45	2901.53	2534.91	3179.48	14.004	0.894765	0.919524	1.02767
Around Nucleus	2	117	788.422	362.34	2176.66	38.006				Around Nucleus	2	102	3242.79	2294.8	5369.96	32.98
Cytoplasmic line	3	69	924.34	318.935	1944.6	22.004				Cytoplasmic line	3	99	3155.47	1303.6	6625.27	31.998
Next to Net1	1	21	827.34	582.825	1030.67	6	0.837038	0.551388	0.658737	Next to Net1	1	30	2522.85	2104.55	3095.53	9.004	1.50752	0.807212	0.535456
Around Nucleus	2	114	988.414	330.002	2783.16	36.994				Around Nucleus	2	108	1673.51	406.457	3094.85	35.008
Cytoplasmic line	3	54	1500.47	490.483	3270.23	17.002				Cytoplasmic line	3	66	3125.39	1555.35	5366.72	21.01
Next to Net1	1	27	1756.59	596.447	3650.57	8.004	1.34614	0.71717	0.532759	Next to Net1	1	30	2158.57	1658.48	2639.97	9.004	1.05446	0.694352	0.658489
Around Nucleus	2	45	1304.9	570.38	3964.25	14.001				Around Nucleus	2	78	2047.08	1421.33	3426.72	24.984
Cytoplasmic line	3	45	2449.33	701.21	4409.07	13.989				Cytoplasmic line	3	63	3108.76	1282.06	7396.59	19.991
Next to Net1	1	24	764.226	638.842	958.946	7.005	0.781679	0.646815	0.827469	Next to Net1	1	45	3315.92	1602.09	5486.94	13.981	0.929114	0.863673	0.929567
Around Nucleus	2	42	977.673	497.148	2078.83	13.004				Around Nucleus	2	120	3568.91	1688.08	6625.31	39.048
Cytoplasmic line	3	66	1181.52	492.702	3468.56	21.001				Cytoplasmic line	3	108	3839.32	1111.2	6695.91	34.997
Next to Net1	1	21	797.571	584.714	1112.08	6.002	0.875254	0.650206	0.742876	Next to Net1	1	42	2829.91	2036.97	3334.79	13.005	0.534411	0.617491	1.15546
Around Nucleus	2	48	911.245	538.817	1862.72	14.997				Around Nucleus	2	87	5295.39	3015.92	10987.3	28.02
Cytoplasmic line	3	54	1226.64	588.56	2824.88	16.998				Cytoplasmic line	3	75	4582.92	1716.55	9992.94	23.988
Next to Net1	1	21	921.125	514.574	1340.67	6.003	1.04348	0.727705	0.697381	Next to Net1	1	39	1618.72	837.915	2327.59	11.995	1.0966	0.520856	0.474974
Around Nucleus	2	108	882.741	446.418	1702.71	34.997				Around Nucleus	2	57	1476.13	602.364	2575.19	17.994
Cytoplasmic line	3	66	1265.79	500.427	2893.29	20.991				Cytoplasmic line	3	75	3107.82	678.706	11862.4	24.003
Next to Net1	1	33	1038.49	536.668	2171.43	9.987	1.34683	1.04486	0.77579	Next to Net1	1	24	1197.29	1053.58	1533.82	6.994	0.528274	0.34417	0.651499
Around Nucleus	2	48	771.06	477.374	1039.23	15.006				Around Nucleus	2	78	2266.41	1052.77	6721.48	24.974
Cytoplasmic line	3	54	993.903	423.07	2245.39	17.009				Cytoplasmic line	3	78	3478.76	1118.56	9843.2	24.997
Next to Net1	1	21	1229.41	644.977	2166.75	6.01	1.62519	1.71899	1.05771	Next to Net1	1	30	1214.73	956.435	1687.7	8.996	0.677068	0.421551	0.622613
Around Nucleus	2	72	756.471	465.876	1034.02	23.004				Around Nucleus	2	72	1794.1	1000.11	3693.89	23.003
Cytoplasmic line	3	45	715.194	436.097	1110.81	13.989				Cytoplasmic line	3	45	2881.57	800.816	6896.44	14.008
Next to Net1	4	30	927.294	719.762	1211.38	8.997	0.79014	0.79791	1.00983	Next to Net1	4	48	2278.33	1254.3	3927.95	14.995	1.1728	0.880466	0.750738
Around Nucleus	5	81	1173.58	555.915	3291.65	26.018				Around Nucleus	5	90	1942.64	697.806	4245.46	28.997
Cytoplasmic line	6	51	1162.15	601.898	2341.62	16.015				Cytoplasmic line	6	45	2587.65	1300.44	4043.26	14.001
Next to Net1	7	24	1441.06	525.985	3023.99	7.006	0.924756	1.14802	1.24143	Next to Net1	7	51	2993.08	1085.64	8023.49	16.011	1.14311	0.958254	0.838289
Around Nucleus	8	60	1558.31	776.553	2907.18	19.016				Around Nucleus	8	102	2618.37	595.208	9091.45	32.995
Cytoplasmic line	9	54	1255.25	681.614	2517.99	17.016				Cytoplasmic line	9	66	3123.47	1459.06	7230.49	21.01
Next to Net1	1	30	1042.38	623.613	1369.32	9.001	1.28107	0.849672	0.663251	Next to Net1	1	45	1108	713.7	1535.62	14.003	0.390156	0.232123	0.59495
Around Nucleus	2	36	813.676	577.451	1158.49	10.989				Around Nucleus	2	93	2839.89	879.271	7922.09	29.985
Cytoplasmic line	3	48	1226.8	942.624	1816.69	14.999				Cytoplasmic line	3	63	4773.33	1650.73	10360.3	20.018
Next to Net1	1	30	1056.12	538.773	2519.04	8.992	1.00327	0.801646	0.799031	Next to Net1	1	24	4008.8	2804.56	6020.14	7.004	1.46264	0.722494	0.493965
Around Nucleus	2	54	1052.68	696.14	2063.16	17.009				Around Nucleus	2	87	2740.79	1454.26	4024.82	28.012
Cytoplasmic line	3	60	1317.44	626.595	2343.38	18.985				Cytoplasmic line	3	66	5548.55	1373.77	12816.8	20.993
Next to Net1	1	33	1706.1	980.865	2366.17	10.007	1.42856	1.15113	0.805799	Next to Net1	1	42	2656.31	1547.01	4924.53	13.007	1.28556	0.750135	0.583506
Around Nucleus	2	39	1194.28	838.052	2156.64	12.002				Around Nucleus	2	126	2066.26	986.447	4753.3	40.986
Cytoplasmic line	3	54	1482.11	869.66	2363.43	17.014				Cytoplasmic line	3	81	3541.11	1502.58	10883.7	26.015
Next to Net1	1	24	1150.25	698.053	1726.61	6.994	1.41708	0.925049	0.652786	Next to Net1	1	45	3525.88	1989.32	5952.61	14.005	1.38868	0.996443	0.717548
Around Nucleus	2	54	811.705	658.273	1179.52	16.995				Around Nucleus	2	81	2539.02	1629.76	4741.86	26.011
Cytoplasmic line	3	39	1243.45	596.984	2282.95	11.998				Cytoplasmic line	3	45	3538.47	2061.54	5727.17	14.01
Next to Net1	4	27	828.394	602.075	996.933	7.998	0.534486	0.552979	1.0346	Next to Net1	4	54	1344.35	526.382	2416.23	17.008	0.730289	0.302549	0.414287
Around Nucleus	5	51	1549.89	663.894	3362.57	15.983				Around Nucleus	5	63	1840.85	473.68	4413.38	20.005
Cytoplasmic line	6	51	1498.06	654.445	3809.15	15.996				Cytoplasmic line	6	57	4443.41	1837.9	8849.1	17.996
Next to Net1	7	36	880.948	556.02	1332.57	11.009	0.530986	0.546075	1.02842	Next to Net1	7	51	1757.71	690.152	4731.18	16.024	1.68034	0.57069	0.339628
Around Nucleus	8	36	1659.08	723.32	3537.34	10.987				Around Nucleus	8	51	1046.05	350.514	2780.57	15.988
Cytoplasmic line	9	63	1613.23	699.884	4038.83	20.002				Cytoplasmic line	9	66	3079.98	764.401	8809.07	21.012
Next to Net1	1	27	1136.88	719.087	3229.26	8.006	1.11141	0.587396	0.528514	Next to Net1	1	51	1980.62	596.616	9197.02	15.996	0.654667	0.291899	0.445874
Around Nucleus	2	42	1022.91	595.124	3472.81	13.01				Around Nucleus	2	84	3025.39	1315.6	11137	26.984
Cytoplasmic line	3	51	1935.45	598.678	6316.07	15.997				Cytoplasmic line	3	48	6785.31	1952.21	15604.4	15
Next to Net1	4	18	737.48	635.759	901.105	4.997	0.645826	0.205256	0.317819	Next to Net1	4	54	4998.77	2714.68	9482.35	16.982	0.831672	0.94499	1.13625
Around Nucleus	5	54	1141.92	681.884	2839.08	17.004				Around Nucleus	5	90	6010.51	4187.89	13228.6	29.006
Cytoplasmic line	6	39	3592.98	977.332	9434.18	12.005				Cytoplasmic line	6	54	5289.76	3447.95	13244.1	17.009
Next to Net1	1	30	2645.1	780.002	6928.38	8.991	3.84629	3.12247	0.811815	Next to Net1	1	45	4073.53	2999.35	5376.57	14.026	1.55418	1.12823	0.725933
Around Nucleus	2	87	687.702	355.89	1549.71	28.027				Around Nucleus	2	96	2621.02	736.771	4627.6	31.023
Cytoplasmic line	3	54	847.117	371.045	2316.24	17.028				Cytoplasmic line	3	72	3610.56	1509.62	8438.01	22.997
Next to Net1	4	27	588.94	449.343	780.571	8.008	0.660238	0.639507	0.9686	Next to Net1	1	42	1755.89	903.145	3507.53	12.987	0.840396	0.612864	0.729256
Around Nucleus	5	72	892.011	489.657	2465.89	23.023				Around Nucleus	2	93	2089.36	685.366	3703.25	29.995
Cytoplasmic line	6	45	920.928	461.668	2527.72	14.001				Cytoplasmic line	3	75	2865.06	1138.92	10179.2	24.013
Next to Net1	1	30	2768.48	1088.27	4739.23	9.009	2.22995	1.54219	0.69158	Next to Net1	1	54	2699.63	1343.02	5737.09	17.004	0.723779	0.70862	0.979056
Around Nucleus	2	51	1241.5	529.147	2300.93	15.98				Around Nucleus	2	114	3729.91	2146.25	8417.03	37.01
Cytoplasmic line	3	39	1795.16	607.15	3461.32	12.005				Cytoplasmic line	3	72	3809.7	1290.77	10169	23.003
Next to Net1	4	15	856.023	658.309	1227.55	3.997	0.822438	0.774539	0.94176	Next to Net1	4	36	1777.44	981.948	3603.99	11.004	1.01895	1.35589	1.33068
Around Nucleus	5	78	1040.84	171.746	3854.05	25.002				Around Nucleus	5	75	1744.38	1042.48	4030.94	24.012
Cytoplasmic line	6	57	1105.2	420.985	2631.16	17.999				Cytoplasmic line	6	54	1310.9	670.578	2328.55	17.009
Next to Net1	1	12	960.425	760.821	1184.95	3.004	0.953177	0.871258	0.914057	Next to Net1	1	69	2035.16	1550.16	3034.8	21.975	0.710901	0.677649	0.953226
Around Nucleus	2	60	1007.6	517.213	1810.44	19.005				Around Nucleus	2	54	2862.79	1879.69	6128.73	16.994
Cytoplasmic line	3	48	1102.34	630.828	1922.43	14.987				Cytoplasmic line	3	72	3003.26	1129.3	7011.79	23.003
Next to Net1	4	15	561.426	298.875	843.44	3.993	0.930282	0.694169	0.746192	Next to Net1	4	36	1708.22	835.254	3469.04	11.001	0.783447	1.25944	1.60756
Around Nucleus	5	51	603.501	299.983	1421.22	16.002				Around Nucleus	5	72	2180.39	776.828	7631.77	23.01
Cytoplasmic line	6	51	808.774	339.789	2497.48	16.015				Cytoplasmic line	6	72	1356.33	697.405	2676.24	23.014
Next to Net1										Next to Net1
Around Nucleus										Around Nucleus
Cytoplasmic line										Cytoplasmic line
Next to Net1										Next to Net1
Around Nucleus										Around Nucleus
Cytoplasmic line										Cytoplasmic line
Next to Net1										Next to Net1
Around Nucleus										Around Nucleus
Cytoplasmic line										Cytoplasmic line
Next to Net1										Next to Net1
Around Nucleus										Around Nucleus
Cytoplasmic line										Cytoplasmic line
Next to Net1										Next to Net1
Around Nucleus										Around Nucleus
Cytoplasmic line										Cytoplasmic line
Next to Net1				0h
Around Nucleus				Around Nucleus	1031.62						24h
Cytoplasmic line				Around Nucleus	1415.63						mean
				Around Nucleus	654.531
				Around Nucleus	1039.24					Around Nucleus	1566.41
				Around Nucleus	1104.24					Around Nucleus	1746.33
				Around Nucleus	1152.16					Around Nucleus	2946.47
				Around Nucleus	2517.7					Around Nucleus	1532.72
				Around Nucleus	1083.98					Around Nucleus	1558.66
				Around Nucleus	1180.82					Around Nucleus	2225.48
				Around Nucleus	823.667					Around Nucleus	6010.7
				Around Nucleus	772.077					Around Nucleus	3308.7
				Around Nucleus	981.158					Around Nucleus	3547.85
				Around Nucleus	830.778					Around Nucleus	5438.06
				Around Nucleus	700.994					Around Nucleus	3078.24
				Around Nucleus	966.514					Around Nucleus	1725.87
				Around Nucleus	798.572					Around Nucleus	2938.89
				Around Nucleus	4126.28					Around Nucleus	2452.16
				Around Nucleus	2171.65					Around Nucleus	2964.71
				Around Nucleus	1697.04					Around Nucleus	3020.74
				Around Nucleus	1173.07					Around Nucleus	3215.64
				Around Nucleus	995.221					Around Nucleus	5090.45
				Around Nucleus	765.386					Around Nucleus	3681.42
				Around Nucleus	756.711					Around Nucleus	5080.13
				Around Nucleus	766.414					Around Nucleus	1712.61
				Around Nucleus	1141.82					Around Nucleus	4019.28
				Around Nucleus	760.123					Around Nucleus	4097.7
				Around Nucleus	788.422					Around Nucleus	2280.23
				Around Nucleus	988.414					Around Nucleus	4571.73
				Around Nucleus	1304.9					Around Nucleus	967.09
				Around Nucleus	977.673					Around Nucleus	3242.79
				Around Nucleus	911.245					Around Nucleus	1673.51
				Around Nucleus	882.741					Around Nucleus	2047.08
				Around Nucleus	771.06					Around Nucleus	3568.91
				Around Nucleus	756.471					Around Nucleus	5295.39
				Around Nucleus	1173.58					Around Nucleus	1476.13
				Around Nucleus	1558.31					Around Nucleus	2266.41
				Around Nucleus	813.676					Around Nucleus	1794.1
				Around Nucleus	1052.68					Around Nucleus	1942.64
				Around Nucleus	1194.28					Around Nucleus	2618.37
				Around Nucleus	811.705					Around Nucleus	2839.89
				Around Nucleus	1549.89					Around Nucleus	2740.79
				Around Nucleus	1659.08					Around Nucleus	2066.26
				Around Nucleus	1022.91					Around Nucleus	2539.02
				Around Nucleus	1141.92					Around Nucleus	1840.85
				Around Nucleus	687.702					Around Nucleus	1046.05
				Around Nucleus	892.011					Around Nucleus	3025.39
				Around Nucleus	1241.5					Around Nucleus	6010.51
				Around Nucleus	1040.84					Around Nucleus	2621.02
				Around Nucleus	1007.6					Around Nucleus	2089.36
				Around Nucleus	603.501					Around Nucleus	3729.91
				Cytoplasmic line	1090.61					Around Nucleus	1744.38
				Cytoplasmic line	1136.87					Around Nucleus	2862.79
				Cytoplasmic line	799.37					Around Nucleus	2180.39
				Cytoplasmic line	1553.8					Cytoplasmic line	3693.34
				Cytoplasmic line	1836.58					Cytoplasmic line	2626.02
				Cytoplasmic line	1278.32					Cytoplasmic line	3120.73
				Cytoplasmic line	2508.3					Cytoplasmic line	3182.89
				Cytoplasmic line	1511.68					Cytoplasmic line	2199.3
				Cytoplasmic line	1238.41					Cytoplasmic line	2589.09
				Cytoplasmic line	1029.26					Cytoplasmic line	5914.4
				Cytoplasmic line	1123.37					Cytoplasmic line	4172.7
				Cytoplasmic line	912.68					Cytoplasmic line	3406.52
				Cytoplasmic line	869.417					Cytoplasmic line	5832.11
				Cytoplasmic line	984.073					Cytoplasmic line	3367.84
				Cytoplasmic line	1015.15					Cytoplasmic line	1910.97
				Cytoplasmic line	1093.77					Cytoplasmic line	2820.97
				Cytoplasmic line	3634					Cytoplasmic line	4290.4
				Cytoplasmic line	2210.83					Cytoplasmic line	3684.75
				Cytoplasmic line	1495.11					Cytoplasmic line	4173.49
				Cytoplasmic line	1269.45					Cytoplasmic line	3495.55
				Cytoplasmic line	1439.5					Cytoplasmic line	4764.67
				Cytoplasmic line	980.085					Cytoplasmic line	4694.67
				Cytoplasmic line	1286.1					Cytoplasmic line	5426.82
				Cytoplasmic line	1498.07					Cytoplasmic line	2608.86
				Cytoplasmic line	1034.54					Cytoplasmic line	5608.95
				Cytoplasmic line	1473.92					Cytoplasmic line	1297.56
				Cytoplasmic line	924.34					Cytoplasmic line	2598.45
				Cytoplasmic line	1500.47					Cytoplasmic line	4235.8
				Cytoplasmic line	2449.33					Cytoplasmic line	4328.4
				Cytoplasmic line	1181.52					Cytoplasmic line	3155.47
				Cytoplasmic line	1226.64					Cytoplasmic line	3125.39
				Cytoplasmic line	1265.79					Cytoplasmic line	3108.76
				Cytoplasmic line	993.903					Cytoplasmic line	3839.32
				Cytoplasmic line	715.194					Cytoplasmic line	4582.92
				Cytoplasmic line	1162.15					Cytoplasmic line	3107.82
				Cytoplasmic line	1255.25					Cytoplasmic line	3478.76
				Cytoplasmic line	1226.8					Cytoplasmic line	2881.57
				Cytoplasmic line	1317.44					Cytoplasmic line	2587.65
				Cytoplasmic line	1482.11					Cytoplasmic line	3123.47
				Cytoplasmic line	1243.45					Cytoplasmic line	4773.33
				Cytoplasmic line	1498.06					Cytoplasmic line	5548.55
				Cytoplasmic line	1613.23					Cytoplasmic line	3541.11
				Cytoplasmic line	1935.45					Cytoplasmic line	3538.47
				Cytoplasmic line	3592.98					Cytoplasmic line	4443.41
				Cytoplasmic line	847.117					Cytoplasmic line	3079.98
				Cytoplasmic line	920.928					Cytoplasmic line	6785.31
				Cytoplasmic line	1795.16					Cytoplasmic line	5289.76
				Cytoplasmic line	1105.2					Cytoplasmic line	3610.56
				Cytoplasmic line	1102.34					Cytoplasmic line	2865.06
				Cytoplasmic line	808.774					Cytoplasmic line	3809.7
				Next to Net1	1125.24					Cytoplasmic line	1310.9
				Next to Net1	562.42					Cytoplasmic line	3003.26
				Next to Net1	681.934					Cytoplasmic line	1356.33
				Next to Net1	575.718					Next to Net1	2053.8
				Next to Net1	770.005					Next to Net1	1443.93
				Next to Net1	1959.15					Next to Net1	3513.12
				Next to Net1	526.406					Next to Net1	1396.34
				Next to Net1	830.19					Next to Net1	2775.55
				Next to Net1	1482.12					Next to Net1	6996.94
				Next to Net1	892.58					Next to Net1	2716.95
				Next to Net1	1108.18					Next to Net1	3386.38
				Next to Net1	740.424					Next to Net1	4741.54
				Next to Net1	1010.49					Next to Net1	3033.73
				Next to Net1	1610.16					Next to Net1	1281.36
				Next to Net1	1417.11					Next to Net1	2205.08
				Next to Net1	1951.37					Next to Net1	1595.44
				Next to Net1	903.74					Next to Net1	1423.7
				Next to Net1	937.78					Next to Net1	3745.16
				Next to Net1	603.74					Next to Net1	3435.75
				Next to Net1	834.281					Next to Net1	2811.46
				Next to Net1	834.973					Next to Net1	3940.78
				Next to Net1	651.648					Next to Net1	3697.32
				Next to Net1	711.355					Next to Net1	2764.99
				Next to Net1	931.622					Next to Net1	3843.4
				Next to Net1	1169.89					Next to Net1	2255.2
				Next to Net1	920.832					Next to Net1	1488.49
				Next to Net1	827.34					Next to Net1	3697.29
				Next to Net1	1756.59					Next to Net1	2781.05
				Next to Net1	764.226					Next to Net1	2901.53
				Next to Net1	797.571					Next to Net1	2522.85
				Next to Net1	921.125					Next to Net1	2158.57
				Next to Net1	1038.49					Next to Net1	3315.92
				Next to Net1	1229.41					Next to Net1	2829.91
				Next to Net1	927.294					Next to Net1	1618.72
				Next to Net1	1441.06					Next to Net1	1197.29
				Next to Net1	1042.38					Next to Net1	1214.73
				Next to Net1	1056.12					Next to Net1	2278.33
				Next to Net1	1706.1					Next to Net1	2993.08
				Next to Net1	1150.25					Next to Net1	1108
				Next to Net1	828.394					Next to Net1	4008.8
				Next to Net1	880.948					Next to Net1	2656.31
				Next to Net1	1136.88					Next to Net1	3525.88
				Next to Net1	737.48					Next to Net1	1344.35
				Next to Net1	2645.1					Next to Net1	1757.71
				Next to Net1	588.94					Next to Net1	1980.62
				Next to Net1	2768.48					Next to Net1	4998.77
				Next to Net1	856.023					Next to Net1	4073.53
				Next to Net1	960.425					Next to Net1	1755.89
				Next to Net1	561.426					Next to Net1	2699.63
				Next to Net1	1279.05					Next to Net1	1777.44
										Next to Net1	2035.16
										Next to Net1	1708.22
										Next to Net1	2290.06

## Sheet: Vps4-GFP_Net1-mCh
Single focal plane	Strain: yYB17311				Paired!!!		Up to position 3
Background substracted			0h		Paired cells									24h
			Mean				Net1/Nuclear	Net1/Cytoplasmic	Nuclear/Cytoplasmic					Mean				Net1/Nuclear	Net1/Cytoplasmic	Nuclear/Cytoplasmic
Next to Net1	1	15	726.267	372	1149	-21.801	0.802691	0.829868	1.03386		Next to Net1	1	24	1193.17	770.897	1842.04	6.997	0.630395	0.511176	0.810883
Around Nucleus	2	138	904.79	178.486	2777.68	0					Around Nucleus	2	114	1892.74	826.25	2850.58	36.997
Cytoplasmic line	3	33	875.16	566.701	1479.27	0					Cytoplasmic line	3	63	2334.17	1448.21	3210.42	19.981			0.865875
Next to Net1	1	27	570.392	288.775	803.743	8.006	0.614076	0.57729	0.940095		Next to Net1	1	39	1436.62	849.861	1999.52	11.995	0.865875	0.812162
Around Nucleus	2	66	928.862	555.926	1260.41	20.997					Around Nucleus	2	159	1659.16	913.542	2610.32	52.01			1.99067
Cytoplasmic line	3	75	988.051	385.06	2491.28	24.002					Cytoplasmic line	3	102	1768.89	964.497	2274.84	33.02
Next to Net1	1	24	1250.21	1014.34	1760.78	6.997	1.27043	1.20041	0.944884		Next to Net1	1	30	888.589	576.361	1137.19	9.017	0.52679	0.386817	0.73429
Around Nucleus	2	90	984.087	422.981	1831.24	29.016					Around Nucleus	2	66	1686.8	684.491	2548.47	20.98
Cytoplasmic line	3	51	1041.49	514.966	1649.22	16.011					Cytoplasmic line	3	42	2297.18	1570.48	3168.09	12.989			1.26416
Next to Net1	1	21	894.961	674.963	1100.5	5.983	0.985486	0.947289	0.961241		Next to Net1	1	36	3304.28	2241.65	5096.39	11.011	1.26416	0.916835
Around Nucleus	2	87	908.142	589.704	1171.01	27.991					Around Nucleus	2	84	2613.81	1614.78	4010	27.015			1.81368
Cytoplasmic line	3	48	944.76	770.971	1169.85	14.987					Cytoplasmic line	3	54	3604	2122.65	5504.63	17.014
Next to Net1	1	27	655.476	340.653	946.248	7.995	0.562081	0.54489	0.969416		Next to Net1	1	45	1987.12	1674.85	2645.3	14.002	1.19705	1.00768	0.841798
Around Nucleus	2	42	1166.16	748.214	1590.71	12.993					Around Nucleus	2	96	1660.02	847.767	2443.67	31.004
Cytoplasmic line	3	69	1202.95	388.386	2460.26	21.989					Cytoplasmic line	3	102	1971.99	792.304	3007	32.995			1.40168
Next to Net1	1	33	697.655	455.773	1288.41	9.989	0.943591	0.869089	0.921044		Next to Net1	1	51	1932.1	1294.27	2716.58	15.998	1.40168	1.07108
Around Nucleus	2	117	739.362	412.395	1256.1	38.005					Around Nucleus	2	63	1378.41	888.643	2741.71	20.012			1.10137
Cytoplasmic line	3	60	802.743	506.882	1319.78	18.994					Cytoplasmic line	3	99	1803.88	840.653	2983.26	32.015
Next to Net1	1	21	948.053	735.503	1177.71	5.995	1.05969	0.721919	0.681258		Next to Net1	1	21	1637.85	1449.26	1874.46	6.021	1.25382	1.31222	1.04658
Around Nucleus	2	66	894.655	638.539	1127.53	20.981					Around Nucleus	2	96	1306.29	443.59	2414.88	30.994
Cytoplasmic line	3	66	1313.24	599.788	3506.77	21.011					Cytoplasmic line	3	66	1248.16	887.439	1877.98	21.012			0.328443
Next to Net1	1	21	1098.32	952.567	1275.6	5.992	1.2411	1.05785	0.852349		Next to Net1	1	33	804.47	173.088	1685.26	9.993	0.328443	0.286811
Around Nucleus	2	51	884.962	668.271	1191.97	16.015					Around Nucleus	2	45	2449.34	1306.62	3924.2	14.015			0.98802
Cytoplasmic line	3	48	1038.26	718.278	1365.32	15.014					Cytoplasmic line	3	75	2804.88	1352.35	3969.24	23.987
Next to Net1	1	24	904.272	671.932	1077.26	7	0.880066	0.882143	1.00236		Next to Net1	1	48	2838.88	2073.45	3537.34	15.003	1.40101	1.26342	0.901792
Around Nucleus	2	57	1027.51	414.808	2015.9	18					Around Nucleus	2	60	2026.31	1453.79	2953.72	19.008
Cytoplasmic line	3	42	1025.09	465.805	2084.33	12.995					Cytoplasmic line	3	75	2246.98	1030.85	3499.31	24.002			1.13248
Next to Net1	1	15	960.343	639.303	1229.83	3.999	0.941822	0.903543	0.959356		Next to Net1	1	36	2379.18	2024.37	2851.97	10.998	1.13248	1.1267
Around Nucleus	2	39	1019.66	342.702	1547.63	11.987					Around Nucleus	2	81	2100.85	1165.41	6000.72	25.972			1.53905
Cytoplasmic line	3	69	1062.86	509.644	2264.76	21.993					Cytoplasmic line	3	75	2111.64	1179.39	2863.44	24.013
Next to Net1	1	24	992.472	862.344	1120.91	6.999	1.07893	0.967768	0.896973		Next to Net1	1	21	1372.04	1013.99	1716.29	6.013	0.812023	0.674213	0.830288
Around Nucleus	2	30	919.87	595.992	1142.92	8.999					Around Nucleus	2	33	1689.66	946.066	2589.52	9.998
Cytoplasmic line	3	54	1025.53	761.169	1278.74	17.002					Cytoplasmic line	3	75	2035.03	754.69	3188.85	23.987			1.01358
Next to Net1	1	24	1448.01	1180.99	1815.2	6.982	1.36378	1.27073	0.931771		Next to Net1	1	30	2174.35	1645.2	2862.41	9.009	1.01358	1.05676
Around Nucleus	2	51	1061.77	360.017	1499.63	15.998					Around Nucleus	2	42	2145.21	1535.05	2870.59	12.988			1.61316
Cytoplasmic line	3	66	1139.51	528.181	1653.47	21.001					Cytoplasmic line	3	84	2057.55	1192.27	3660.85	26.997
Next to Net1	1	18	904.698	694.976	1111.17	5.004	0.737078	0.634083	0.860266		Next to Net1	1	48	1275.48	401.231	1794.68	15.011	0.920001	0.934027	1.01524
Around Nucleus	2	45	1227.41	765.894	2440.04	14.014					Around Nucleus	2	36	1386.39	1034.5	1754.05	10.99
Cytoplasmic line	3	57	1426.78	823.311	4075.81	18.005					Cytoplasmic line	3	78	1365.57	659.294	1925.44	25.027			0.90621
Next to Net1	1	24	815.389	360.694	1044.16	6.984	1.22239	0.75538	0.617952		Next to Net1	1	39	1881.49	1228.01	2895.44	11.975	0.90621	1.01062
Around Nucleus	2	39	667.043	263.29	999.395	12.002					Around Nucleus	2	48	2076.22	1557.73	3667.74	15.003			1.02629
Cytoplasmic line	3	54	1079.44	582.506	2065.35	17.016					Cytoplasmic line	3	78	1861.71	1369.41	2916.91	25.027
Next to Net1	1	33	607.803	326.264	895.969	9.999	0.742227	0.677453	0.91273		Next to Net1	1	27	1814.03	1206.14	2517.66	8.011	1.10339	1.19538	1.08337
Around Nucleus	2	36	818.891	591.978	1010.91	10.99					Around Nucleus	2	72	1644.05	697.297	3248.33	23.024
Cytoplasmic line	3	72	897.189	327.54	1901.3	23.005					Cytoplasmic line	3	48	1517.54	901.726	2490.86	15.007			1.01732
Next to Net1	1	24	771.037	594.742	898.614	6.994	0.951628	0.775905	0.815344		Next to Net1	1	30	2809.26	1511.77	4119.59	8.997	1.01732	0.931076
Around Nucleus	2	42	810.229	522.513	992.828	12.992					Around Nucleus	2	33	2761.44	1427.15	4102.02	10.001			1.68471
Cytoplasmic line	3	108	993.726	603.368	1457.78	34.998					Cytoplasmic line	3	78	3017.21	1615.89	4905.14	24.989
Next to Net1	1	33	787.159	573.935	980.322	10.005	1.00848	0.852663	0.845491		Next to Net1	1	27	1790.93	1269.59	2756.37	8.004	0.907277	0.943708	1.04016
Around Nucleus	2	39	780.538	236.105	2534.76	11.994					Around Nucleus	2	48	1973.97	1484.33	2637.29	15.013
Cytoplasmic line	3	69	923.177	392	1966.24	22.006					Cytoplasmic line	3	78	1897.76	973.76	2613.2	25.016			1.1207
Next to Net1	1	21	825.872	496.136	1148.34	6.008	1.01939	1.04886	1.02891		Next to Net1	1	45	1565.6	1072.19	2224.61	14.017	1.1207	1.01063
Around Nucleus	2	60	810.165	563.691	1402.35	19.015					Around Nucleus	2	57	1396.99	843.174	2264.64	18.004			1.69891
Cytoplasmic line	3	66	787.399	366.5	1847.47	21.04					Cytoplasmic line	3	69	1549.14	723.029	2243.3	21.993
Next to Net1	1	54	887.762	587.382	1147.59	16.992	1.0833	0.957264	0.883654		Next to Net1	1	42	911.842	450.296	1873.87	12.994	0.277563	0.26358	0.949622
Around Nucleus	2	48	819.496	324.502	1291.06	15.002					Around Nucleus	2	75	3285.17	1553.78	5194.62	24.004
Cytoplasmic line	3	81	927.395	453.865	1546.71	26.03					Cytoplasmic line	3	69	3459.45	2570.44	5449.42	21.975			1.43517
Next to Net1	1	33	620.32	305.913	860.302	10.004	0.708007	0.687451	0.970967		Next to Net1	1	39	2971.99	2164.1	3715.64	11.992	1.43517	1.07556
Around Nucleus	2	54	876.15	484.778	1368.47	16.996					Around Nucleus	2	78	2070.82	775.031	3449.93	24.993			1.52768
Cytoplasmic line	3	42	902.348	478.496	1457.77	12.992					Cytoplasmic line	3	93	2763.19	1004.58	4762.85	29.989
Next to Net1	1	24	954.082	790.338	1151.48	7.013	0.879539	0.919048	1.04492		Next to Net1	1	45	1808.76	789.665	3569.17	13.977	0.64511	0.646701	1.00247
Around Nucleus	2	42	1084.75	865.598	1315.37	13.008					Around Nucleus	2	66	2803.8	1480.47	5552.55	21.008
Cytoplasmic line	3	54	1038.12	706.347	1353.58	17.014					Cytoplasmic line	3	60	2796.9	1632.7	5102.4	18.985			1.07162
Next to Net1	1	18	919.788	702.582	1084.71	4.99	0.939367	0.871897	0.928175		Next to Net1	1	24	1716.84	918.376	3299.23	7.009	1.07162	0.970445
Around Nucleus	2	51	979.157	805.086	1302.08	16.005					Around Nucleus	2	75	1602.11	728.586	4212.72	24.012			0.977847
Cytoplasmic line	3	60	1054.93	716.449	2182.14	18.988					Cytoplasmic line	3	63	1769.13	687.794	4774.76	20.002
Next to Net1	1	24	961.048	619.413	1523.86	6.982	0.879682	0.933036	1.06065		Next to Net1	1	51	1809.21	741.026	3027.03	16.015	0.762957	0.670195	0.878418
Around Nucleus	2	63	1092.49	725.696	1601.43	20.015					Around Nucleus	2	54	2371.31	1001.94	3433.35	17.006
Cytoplasmic line	3	60	1030.02	394.659	1940.53	19.014					Cytoplasmic line	3	69	2699.53	1693.07	3648.87	22.019			1.04321
Next to Net1	1	18	782.032	572.947	940.257	4.999	1.46904	0.872485	0.593917		Next to Net1	1	30	1674.64	1338.63	2032.32	8.992	1.04321	0.908358
Around Nucleus	2	27	532.344	314.003	763.682	8.007					Around Nucleus	2	147	1605.27	440.142	3325.05	47.985			2.30898
Cytoplasmic line	3	57	896.327	628.332	1644.3	18.012					Cytoplasmic line	3	69	1843.59	919.804	3343.78	21.975
Next to Net1	1	33	897.885	612.827	1330.01	10.008	0.80385	0.847371	1.05414		Next to Net1	1	39	798.442	544.124	1093.92	11.983	0.738055	0.674587	0.914006
Around Nucleus	2	39	1116.98	748.75	1630.65	11.988					Around Nucleus	2	33	1081.82	837.855	1371.83	9.992
Cytoplasmic line	3	78	1059.61	525.009	2137.2	24.989					Cytoplasmic line	3	54	1183.6	824.806	2124.98	17.016			1.11668
Next to Net1	1	33	741.25	506.41	916.61	9.985	0.842465	0.702212	0.83352		Next to Net1	1	27	2041.57	1837.24	2466.57	8.005	1.11668	1.07321
Around Nucleus	2	42	879.858	677.075	1119.7	12.997					Around Nucleus	2	111	1828.25	1175.65	2580.33	35.995			1.11301
Cytoplasmic line	3	51	1055.59	565.909	2359.58	15.984					Cytoplasmic line	3	63	1902.3	1211.92	3192.14	19.991
Next to Net1	1	21	908.854	725.262	1145.69	5.997	1.03892	1.26006	1.21286		Next to Net1	1	51	1709.15	1288.63	2111.91	16.015	1.08592	0.917547	0.844951
Around Nucleus	2	24	874.808	702.851	1074.49	6.992					Around Nucleus	2	75	1573.92	414.408	2768.33	23.996
Cytoplasmic line	3	57	721.276	438.159	1062.88	17.981					Cytoplasmic line	3	78	1862.74	824.117	3989.43	24.985			1.23208
Next to Net1	1	36	1862.79	1165.78	4455.48	11.005	1.8089	1.01293	0.559971		Next to Net1	1	45	1248.79	955.162	1550.16	14.015	1.23208	0.964731
Around Nucleus	2	66	1029.79	354.914	1455.68	21.013					Around Nucleus	2	93	1013.56	629.07	1539.29	29.994			1.22042
Cytoplasmic line	3	57	1839.01	619.162	4329.24	18.008					Cytoplasmic line	3	78	1294.44	490.588	2348.97	24.997
Next to Net1	1	24	1133.3	956.854	1524.04	7.009	0.877747	0.789094	0.898999		Next to Net1	1	60	1060.65	568.026	1631.59	19.01	0.656138	0.725936	1.10638
Around Nucleus	2	42	1291.15	982.652	1972.2	12.993					Around Nucleus	2	69	1616.5	947.206	2422.9	21.995
Cytoplasmic line	3	66	1436.21	764.475	3403.48	20.99					Cytoplasmic line	3	54	1461.08	917.859	2132.02	17.009			0.956648
Next to Net1	1	21	1348	1036.29	1910.78	6.005	1.17648	0.829777	0.705307		Next to Net1	1	21	1911.41	1456.01	2696.27	5.989	0.956648	0.583204
Around Nucleus	2	39	1145.8	661.03	1504.49	11.984					Around Nucleus	2	63	1998.03	888.084	3324.89	20.035			1.895
Cytoplasmic line	3	48	1624.54	730.534	2909.26	15.011					Cytoplasmic line	3	54	3277.43	2112.16	6748.6	17.014
Next to Net1	1	27	974.705	624.052	1167.82	8.001	0.844583	0.864235	1.02327		Next to Net1	1	36	1729.51	1494.18	1930.69	11	1.15857	1.34069	1.1572
Around Nucleus	2	39	1154.07	964.002	1369.95	11.986					Around Nucleus	2	87	1492.8	1121.3	1993.93	27.979
Cytoplasmic line	3	81	1127.82	602.518	2505.26	26.005					Cytoplasmic line	3	66	1290.01	975.339	1525.38	21.01			1.79466
Next to Net1	1	27	1111.68	833.257	1385.5	7.989	0.84665	0.851847	1.00614		Next to Net1	1	48	1369.21	1058.85	1591.75	15.004	1.79466	1.22324
Around Nucleus	2	48	1313.03	541.896	2327.24	15.002					Around Nucleus	2	84	762.936	378.858	1361.46	26.983			0.792601
Cytoplasmic line	3	63	1305.02	819.264	2229.64	20.006					Cytoplasmic line	3	81	1119.34	619.276	1531.34	26.018
Next to Net1	1	15	1207.22	1032.56	1451.61	3.997	0.868493	0.87059	1.00242		Next to Net1	1	42	1412.23	1130.37	1639.69	12.974	1.19577	0.969642	0.810891
Around Nucleus	2	42	1390.02	1015.57	1698.31	13.004					Around Nucleus	2	51	1181.02	714.119	1917.52	15.978
Cytoplasmic line	3	54	1386.67	700.001	3259.45	17.002					Cytoplasmic line	3	75	1456.44	998.683	2121.22	23.998			0.565169
Next to Net1	1	24	1199.38	989.804	1351.68	6.991	1.18349	1.23479	1.04335		Next to Net1	1	39	1096.31	557.818	1575.59	12.011	0.565169	0.594313
Around Nucleus	2	45	1013.43	553.86	1386.33	14.002					Around Nucleus	2	42	1939.79	1283.48	2713.55	13.02			1.67939
Cytoplasmic line	3	42	971.319	730.723	1234.98	12.998					Cytoplasmic line	3	75	1844.66	877.583	2480.98	24.004
Next to Net1	1	27	1777.99	1493.53	2523.52	7.992	1.12562	1.02095	0.907014		Next to Net1	1	66	1098.42	665.89	2697.11	21.003	1.07252	0.830978	0.774787
Around Nucleus	2	42	1579.57	1273.37	1855.19	12.994					Around Nucleus	2	63	1024.14	464.062	1442.8	20.006
Cytoplasmic line	3	42	1741.5	1342.65	2068.62	13.001					Cytoplasmic line	3	63	1321.84	658.027	2043.25	20.004			1.10889
Next to Net1	1	18	1210.25	797.614	1558.05	5.007	1.01072	0.77246	0.764266		Next to Net1	1	36	1275.06	933.726	1840.63	11.003	1.10889	0.929247
Around Nucleus	2	63	1197.41	889.419	1560.81	20.022					Around Nucleus	2	105	1149.84	697.515	2226.12	34			0.932309
Cytoplasmic line	3	54	1566.74	788.11	2924.38	17.016					Cytoplasmic line	3	72	1372.14	968.731	1696.24	22.997
Next to Net1	1	24	1361.03	1048.08	1760.94	7.002	0.747103	0.900833	1.20577		Next to Net1	1	45	1471.76	1045.43	1946.53	14.013	0.843925	0.932332	1.10476
Around Nucleus	2	51	1821.74	1216.04	2292.59	16.003					Around Nucleus	2	69	1743.95	1122.87	2632.68	21.987
Cytoplasmic line	3	63	1510.86	657.481	2416.65	20.016					Cytoplasmic line	3	51	1578.58	1118.94	2347.76	16.015			0.878595
Next to Net1	1	30	1311.38	793.109	1648.08	8.992	1.03601	0.996357	0.961726		Next to Net1	1	27	1209.71	880.602	1973.91	7.98	0.878595	0.812465
Around Nucleus	2	36	1265.8	856.84	1572.24	11.003					Around Nucleus	2	63	1376.86	661.171	3404.33	20.019			1.03888
Cytoplasmic line	3	51	1316.17	815.665	1825.93	16.015					Cytoplasmic line	3	63	1488.93	773.204	2890.23	20.018
Next to Net1	1	18	2913.68	1773.23	4134.03	4.984	1.60966	1.41137	0.876815		Next to Net1	1	45	1433.21	899.419	2013.8	13.981	1.19193	0.94167	0.790039
Around Nucleus	2	54	1810.12	683.443	4160.54	17.012					Around Nucleus	2	84	1202.43	630.104	2656.59	27.002
Cytoplasmic line	3	54	2064.43	632.116	4223.38	17.014					Cytoplasmic line	3	69	1521.99	888.176	3058.28	21.987			0.754782
Next to Net1	1	24	1434.2	488.581	3000.18	7.004	1.03044	0.867974	0.842337		Next to Net1	1	21	1588.39	885.957	2474.22	6.01	0.754782	0.700371
Around Nucleus	2	60	1391.84	444.76	2450.92	19.001					Around Nucleus	2	45	2104.43	1486.19	2883.16	14.003			2.15996
Cytoplasmic line	3	60	1652.36	857.114	3487.39	18.981					Cytoplasmic line	3	72	2267.93	1635.26	3585.5	23.008
Next to Net1	1	27	1472.77	1051.77	1916.93	7.995	0.932849	0.78221	0.838518		Next to Net1	1	39	1049.99	830.817	1288.11	11.999	1.26432	1.08582	0.858815
Around Nucleus	2	36	1578.79	843.456	2709.7	11.001					Around Nucleus	2	90	830.472	461.716	1254.19	29.024
Cytoplasmic line	3	57	1882.84	637.444	4076.76	17.99					Cytoplasmic line	3	75	966.997	590.095	1342.4	23.987			0.950694
Next to Net1	1	30	1080.19	769.987	1304.42	8.994	0.862668	0.828287	0.960146		Next to Net1	1	30	1428.78	970.789	2378.06	8.997	0.950694	0.810179
Around Nucleus	2	36	1252.15	735.071	1722.62	10.992					Around Nucleus	2	63	1502.88	785.803	2333.63	20.002			1.06187
Cytoplasmic line	3	42	1304.13	925.446	1747.75	13.01					Cytoplasmic line	3	54	1763.53	1193.29	2508.6	17.014
Next to Net1	1	24	1103.33	698.543	1929.74	7.004	1.02667	0.712835	0.694319		Next to Net1	1	33	1660.79	1322.06	2092.42	9.989	1.01615	0.919139	0.904528
Around Nucleus	2	45	1074.67	831.796	1304.31	13.994					Around Nucleus	2	81	1634.38	1224.39	2067.16	26.006
Cytoplasmic line	3	63	1547.8	646.557	2347.55	20.002					Cytoplasmic line	3	81	1806.89	889.953	2971.61	26.015			0.658969
Next to Net1	1	42	1108.18	596.468	1430.53	12.994	0.876471	0.828314	0.945055		Next to Net1	1	57	1115.09	741.29	1555.62	18.003	0.658969	0.467027
Around Nucleus	2	54	1264.36	936.427	1457.32	17.001					Around Nucleus	2	72	1692.17	561.284	2719.93	22.982			2.92861
Cytoplasmic line	3	51	1337.87	783.86	4234.46	15.984					Cytoplasmic line	3	51	2387.62	1468.06	5769.5	15.996
Next to Net1	1	21	1193.33	851.408	1461.16	6.011	1.10443	0.951975	0.861961		Next to Net1	1	27	815.275	663.524	985.331	7.995	1.11591	1.00822	0.903497
Around Nucleus	2	72	1080.5	431.011	1603.36	22.988					Around Nucleus	2	45	730.592	494.034	1043.43	14.008
Cytoplasmic line	3	39	1253.53	880.221	1625.16	12.008					Cytoplasmic line	3	75	808.627	317.62	1240.53	23.987			0.817223
Next to Net1	1	24	1581.36	1323.62	1914.38	7	0.871448	1.2194	1.39928		Next to Net1	1	21	1131.72	658.468	2035.27	5.994	0.817223	0.780855
Around Nucleus	2	39	1814.64	946.056	4468.53	11.999					Around Nucleus	2	57	1384.83	955.674	2953.71	18.006			0.936049
Cytoplasmic line	3	48	1296.84	847.349	2051	15.007					Cytoplasmic line	3	69	1449.33	701.876	3476	21.975
Next to Net1	1	27	1335.75	970.332	1943.44	8	0.786216	0.886149	1.12711		Next to Net1	1	30	1548.35	1306.8	1734.41	8.989	0.93078	1.03776	1.11494
Around Nucleus	2	48	1698.96	1312.71	2024.01	15.007					Around Nucleus	2	57	1663.5	1173.5	2074.39	17.994
Cytoplasmic line	3	54	1507.36	1112.32	1951.63	16.994					Cytoplasmic line	3	75	1492.01	691.784	1927.69	23.998			1.13637
Next to Net1	1	18	1137	809.274	1610.45	4.99	0.892083	0.673554	0.755035		Next to Net1	1	24	1506.19	1260.43	1844.01	6.997	1.13637	0.939231
Around Nucleus	2	36	1274.55	492.879	2891.48	11.013					Around Nucleus	2	96	1325.44	895.611	1719.43	31.031			0.712987
Cytoplasmic line	3	36	1688.06	797.423	5397.88	11					Cytoplasmic line	3	69	1603.64	1214	2794.48	21.996
Next to Net1	1	30	1450.57	1072.04	2497.83	8.995	1.0337	1.0571	1.02264		Next to Net1	1	36	2249.18	1598.3	3777.66	11.015	0.993319	0.915514	0.921672
Around Nucleus	2	63	1403.28	864.64	3418.54	19.986					Around Nucleus	2	69	2264.31	1252.45	4119.35	21.985
Cytoplasmic line	3	57	1372.21	780.628	2176.8	17.993					Cytoplasmic line	3	84	2456.74	1330.54	4612.7	26.994			1.19774
Next to Net1	1	33	1650.89	1079.66	2165.32	9.99	1.51261	1.10958	0.733553		Next to Net1	1	42	1259.03	920.425	1578.98	13.004	1.19774	1.10327
Around Nucleus	2	33	1091.42	736.289	1512.1	9.985					Around Nucleus	2	63	1051.17	711.798	1442.84	19.961			1.162
Cytoplasmic line	3	48	1487.86	714.933	2145.71	15.005					Cytoplasmic line	3	60	1141.18	770.053	2222.27	18.994
Next to Net1	1	21	1392.34	1058.78	1838.88	5.992	1.03826	1.02448	0.986731		Next to Net1	1	30	982.075	684.483	1224.25	9.013	0.721659	1.13744	1.57615
Around Nucleus	2	48	1341.04	993.826	1956.69	15.005					Around Nucleus	2	48	1360.86	1036.61	1678.89	14.991
Cytoplasmic line	3	63	1359.07	789.56	2046.4	19.981					Cytoplasmic line	3	75	863.406	190.689	1414.27	23.99
Next to Net1
Around Nucleus
Cytoplasmic line
Next to Net1
Around Nucleus
Cytoplasmic line					0h								24h
Next to Net1				Around Nucleus	904.79								Mean
Around Nucleus				Around Nucleus	928.862
Cytoplasmic line				Around Nucleus	984.087							Around Nucleus	1892.74
Next to Net1				Around Nucleus	908.142							Around Nucleus	1659.16
Around Nucleus				Around Nucleus	1166.16							Around Nucleus	1686.8
Cytoplasmic line				Around Nucleus	739.362							Around Nucleus	2613.81
Next to Net1				Around Nucleus	894.655							Around Nucleus	1660.02
Around Nucleus				Around Nucleus	884.962							Around Nucleus	1378.41
Cytoplasmic line				Around Nucleus	1027.51							Around Nucleus	1306.29
				Around Nucleus	1019.66							Around Nucleus	2449.34
				Around Nucleus	919.87							Around Nucleus	2026.31
				Around Nucleus	1061.77							Around Nucleus	2100.85
				Around Nucleus	1227.41							Around Nucleus	1689.66
				Around Nucleus	667.043							Around Nucleus	2145.21
				Around Nucleus	818.891							Around Nucleus	1386.39
				Around Nucleus	810.229							Around Nucleus	2076.22
				Around Nucleus	780.538							Around Nucleus	1644.05
				Around Nucleus	810.165							Around Nucleus	2761.44
				Around Nucleus	819.496							Around Nucleus	1973.97
				Around Nucleus	876.15							Around Nucleus	1396.99
				Around Nucleus	1084.75							Around Nucleus	3285.17
				Around Nucleus	979.157							Around Nucleus	2070.82
				Around Nucleus	1092.49							Around Nucleus	2803.8
				Around Nucleus	532.344							Around Nucleus	1602.11
				Around Nucleus	1116.98							Around Nucleus	2371.31
				Around Nucleus	879.858							Around Nucleus	1605.27
				Around Nucleus	874.808							Around Nucleus	1081.82
				Around Nucleus	1029.79							Around Nucleus	1828.25
				Around Nucleus	1291.15							Around Nucleus	1573.92
				Around Nucleus	1145.8							Around Nucleus	1013.56
				Around Nucleus	1154.07							Around Nucleus	1616.5
				Around Nucleus	1313.03							Around Nucleus	1998.03
				Around Nucleus	1390.02							Around Nucleus	1492.8
				Around Nucleus	1013.43							Around Nucleus	762.936
				Around Nucleus	1579.57							Around Nucleus	1181.02
				Around Nucleus	1197.41							Around Nucleus	1939.79
				Around Nucleus	1821.74							Around Nucleus	1024.14
				Around Nucleus	1265.8							Around Nucleus	1149.84
				Around Nucleus	1810.12							Around Nucleus	1743.95
				Around Nucleus	1391.84							Around Nucleus	1376.86
				Around Nucleus	1578.79							Around Nucleus	1202.43
				Around Nucleus	1252.15							Around Nucleus	2104.43
				Around Nucleus	1074.67							Around Nucleus	830.472
				Around Nucleus	1264.36							Around Nucleus	1502.88
				Around Nucleus	1080.5							Around Nucleus	1634.38
				Around Nucleus	1814.64							Around Nucleus	1692.17
				Around Nucleus	1698.96							Around Nucleus	730.592
				Around Nucleus	1274.55							Around Nucleus	1384.83
				Around Nucleus	1403.28							Around Nucleus	1663.5
				Around Nucleus	1091.42							Around Nucleus	1325.44
				Around Nucleus	1341.04							Around Nucleus	2264.31
				Cytoplasmic line	875.16							Around Nucleus	1051.17
				Cytoplasmic line	988.051							Around Nucleus	1360.86
				Cytoplasmic line	1041.49							Cytoplasmic line	2334.17
				Cytoplasmic line	944.76							Cytoplasmic line	1768.89
				Cytoplasmic line	1202.95							Cytoplasmic line	2297.18
				Cytoplasmic line	802.743							Cytoplasmic line	3604
				Cytoplasmic line	1313.24							Cytoplasmic line	1971.99
				Cytoplasmic line	1038.26							Cytoplasmic line	1803.88
				Cytoplasmic line	1025.09							Cytoplasmic line	1248.16
				Cytoplasmic line	1062.86							Cytoplasmic line	2804.88
				Cytoplasmic line	1025.53							Cytoplasmic line	2246.98
				Cytoplasmic line	1139.51							Cytoplasmic line	2111.64
				Cytoplasmic line	1426.78							Cytoplasmic line	2035.03
				Cytoplasmic line	1079.44							Cytoplasmic line	2057.55
				Cytoplasmic line	897.189							Cytoplasmic line	1365.57
				Cytoplasmic line	993.726							Cytoplasmic line	1861.71
				Cytoplasmic line	923.177							Cytoplasmic line	1517.54
				Cytoplasmic line	787.399							Cytoplasmic line	3017.21
				Cytoplasmic line	927.395							Cytoplasmic line	1897.76
				Cytoplasmic line	902.348							Cytoplasmic line	1549.14
				Cytoplasmic line	1038.12							Cytoplasmic line	3459.45
				Cytoplasmic line	1054.93							Cytoplasmic line	2763.19
				Cytoplasmic line	1030.02							Cytoplasmic line	2796.9
				Cytoplasmic line	896.327							Cytoplasmic line	1769.13
				Cytoplasmic line	1059.61							Cytoplasmic line	2699.53
				Cytoplasmic line	1055.59							Cytoplasmic line	1843.59
				Cytoplasmic line	721.276							Cytoplasmic line	1183.6
				Cytoplasmic line	1839.01							Cytoplasmic line	1902.3
				Cytoplasmic line	1436.21							Cytoplasmic line	1862.74
				Cytoplasmic line	1624.54							Cytoplasmic line	1294.44
				Cytoplasmic line	1127.82							Cytoplasmic line	1461.08
				Cytoplasmic line	1305.02							Cytoplasmic line	3277.43
				Cytoplasmic line	1386.67							Cytoplasmic line	1290.01
				Cytoplasmic line	971.319							Cytoplasmic line	1119.34
				Cytoplasmic line	1741.5							Cytoplasmic line	1456.44
				Cytoplasmic line	1566.74							Cytoplasmic line	1844.66
				Cytoplasmic line	1510.86							Cytoplasmic line	1321.84
				Cytoplasmic line	1316.17							Cytoplasmic line	1372.14
				Cytoplasmic line	2064.43							Cytoplasmic line	1578.58
				Cytoplasmic line	1652.36							Cytoplasmic line	1488.93
				Cytoplasmic line	1882.84							Cytoplasmic line	1521.99
				Cytoplasmic line	1304.13							Cytoplasmic line	2267.93
				Cytoplasmic line	1547.8							Cytoplasmic line	966.997
				Cytoplasmic line	1337.87							Cytoplasmic line	1763.53
				Cytoplasmic line	1253.53							Cytoplasmic line	1806.89
				Cytoplasmic line	1296.84							Cytoplasmic line	2387.62
				Cytoplasmic line	1507.36							Cytoplasmic line	808.627
				Cytoplasmic line	1688.06							Cytoplasmic line	1449.33
				Cytoplasmic line	1372.21							Cytoplasmic line	1492.01
				Cytoplasmic line	1487.86							Cytoplasmic line	1603.64
				Cytoplasmic line	1359.07							Cytoplasmic line	2456.74
				Next to Net1	570.392							Cytoplasmic line	1141.18
				Next to Net1	1250.21							Cytoplasmic line	863.406
				Next to Net1	894.961							Next to Net1	1436.62
				Next to Net1	655.476							Next to Net1	888.589
				Next to Net1	697.655							Next to Net1	3304.28
				Next to Net1	948.053							Next to Net1	1987.12
				Next to Net1	1098.32							Next to Net1	1932.1
				Next to Net1	904.272							Next to Net1	1637.85
				Next to Net1	960.343							Next to Net1	804.47
				Next to Net1	992.472							Next to Net1	2838.88
				Next to Net1	1448.01							Next to Net1	2379.18
				Next to Net1	904.698							Next to Net1	1372.04
				Next to Net1	815.389							Next to Net1	2174.35
				Next to Net1	607.803							Next to Net1	1275.48
				Next to Net1	771.037							Next to Net1	1881.49
				Next to Net1	787.159							Next to Net1	1814.03
				Next to Net1	825.872							Next to Net1	2809.26
				Next to Net1	887.762							Next to Net1	1790.93
				Next to Net1	620.32							Next to Net1	1565.6
				Next to Net1	954.082							Next to Net1	911.842
				Next to Net1	919.788							Next to Net1	2971.99
				Next to Net1	961.048							Next to Net1	1808.76
				Next to Net1	782.032							Next to Net1	1716.84
				Next to Net1	897.885							Next to Net1	1809.21
				Next to Net1	741.25							Next to Net1	1674.64
				Next to Net1	908.854							Next to Net1	798.442
				Next to Net1	1862.79							Next to Net1	2041.57
				Next to Net1	1133.3							Next to Net1	1709.15
				Next to Net1	1348							Next to Net1	1248.79
				Next to Net1	974.705							Next to Net1	1060.65
				Next to Net1	1111.68							Next to Net1	1911.41
				Next to Net1	1207.22							Next to Net1	1729.51
				Next to Net1	1199.38							Next to Net1	1369.21
				Next to Net1	1777.99							Next to Net1	1412.23
				Next to Net1	1210.25							Next to Net1	1096.31
				Next to Net1	1361.03							Next to Net1	1098.42
				Next to Net1	1311.38							Next to Net1	1275.06
				Next to Net1	2913.68							Next to Net1	1471.76
				Next to Net1	1434.2							Next to Net1	1209.71
				Next to Net1	1472.77							Next to Net1	1433.21
				Next to Net1	1080.19							Next to Net1	1588.39
				Next to Net1	1103.33							Next to Net1	1049.99
				Next to Net1	1108.18							Next to Net1	1428.78
				Next to Net1	1193.33							Next to Net1	1660.79
				Next to Net1	1581.36							Next to Net1	1115.09
				Next to Net1	1335.75							Next to Net1	815.275
				Next to Net1	1137							Next to Net1	1131.72
				Next to Net1	1450.57							Next to Net1	1548.35
				Next to Net1	1650.89							Next to Net1	1506.19
				Next to Net1	1392.34							Next to Net1	2249.18
				Next to Net1	726.267							Next to Net1	1259.03
												Next to Net1	982.075
												Next to Net1	1193.17
