# Supplementary material for: DNA circles promote yeast ageing in part through stimulating the reorganization of nuclear pore complexes
Source: eLife. 2022 Apr 4;11:e71196. doi: 10.7554/eLife.71196 (PMC9020822; doi:10.7554/eLife.71196)
Supplement: Figure 5—source data 1. [file elife-71196-fig5-data1.xlsx]

## Sheet: Overview
Relative accumulation of proteins in NPC cap (RA)
Median RA	0.401039	0.361365	0.614061	2.10563	3.0102	2.26737	2.36666	2.36819	1.9738	2.14553	2.69045	2.65456	3.76871	0.955286	1.15368	0.746331	3.07983	2.72581	2.49624	0.377689	0.818173
n	25	29	50	22	43	34	35	34	32	41	20	49	33	25	68	26	34	23	30	38	43
Strain	Esc1	Ulp1	Sac3	Kap95	Kap60	Kap104	Sxm1/Kap108	Cse1/Kap109	Mtr10/Kap111	Kap120	Pse1/Kap121	Kap122	Kap123	Mex67	Mtr2	Dbp5	Xpo1/Crm1	Msn5	Los1	Yra1	Nab2
	0.553551	0.241502	0.143499	1.7149	1.44957	2.94483	1.91099	2.03653	1.79439	3.79884	2.5402	2.03956	3.22656	0.935116	1.29846	0.0328529	1.50515	11.3839	2.90138	0.517577	0.874514
	0.64055	0.392421	0.627571	2.07162	2.03351	1.4809	1.27313	2.5039	3.73037	3.40558	9.53254	5.3609	3.5036	0.955286	1.96611	1.23165	3.36265	2.37895	1.87697	0.526258	0.946815
	1.76796	0.455992	0.672764	2.13963	6.69695	2.30078	1.62675	2.82787	1.29196	4.83467	1.96951	9.95281	2.58504	0.454942	1.30739	0.00175746	0.88122	1.34641	2.90371	0.0748254	0.322972
	0.322283	0.449258	0.447754	2.34574	2.11585	1.35398	2.50152	1.32754	1.04867	1.80039	4.70618	2.4231	6.92984	1.70661	0.998367	0.921644	1.50839	1.87041	4.2711	0.169262	1.92198
	0.552344	0.241721	0.880639	2.00724	1.89494	3.5698	2.34497	1.04338	2.11937	1.11428	3.14551	3.69201	4.29304	0.58455	1.90158	0.331609	2.0003	3.0599	2.64005	0.49659	1.01616
	0.327005	0.679336	0.000978174	1.74804	1.84349	3.137		2.22629	1.76441	1.97867	1.59729	2.6543	7.06873	0.505187	1.15481	0.803024	2.25992	3.12823	3.0422	0.0265732	1.53508
	0.39798	0.43848	0.0701442	3.16685	2.59129	1.93661	3.5232	2.23135	2.70807	2.20074	2.76657	3.88806	17.595	0.290861	1.19548	0.298801	1.24863	2.8466	2.38721	0.379787	0.280898
	1.15029	0.809053	0.809198	2.38332	1.70861	3.68864	1.85879	2.09904	2.67341	0.110226	1.26589	1.95085	3.31891	1.30409	1.71449	0.999701	0.606389	2.04711	11.3839	0.82948	1.14057
	0.375992	0.419689	1.47499	2.88887	6.08344	1.60598		3.49863	1.69839	1.49538	3.03187	2.56946	4.9198	0.69033	2.60885	0.365215	0.78733	1.71291	2.46986	0.313076	0.440458
	0.271809	0.46606	0.38084	0.64211	4.17846	2.33697	1.12844	1.15222	0.900395	2.18623	3.76921	1.93073	3.7327	0.672853	2.8314	0.795745	2.12943	2.93187	1.91897	0.294626	0.55211
	0.278871	1.10275	0.528528	2.1634	5.22538	2.55505	4.19852	1.81205	1.74922	3.81796	7.82334	1.96253	1.27962	1.15707	2.06871	0.535426	3.23006	2.72581	1.66228	0.957532	0.597659
	1.49188	0.279037	1.09369	3.49582	4.59263	2.03487	3.20622	2.97677	1.93771	3.07836	0.0793994	2.63735	19.3908	1.0691	2.54652	1.1704	3.56093	2.09965	1.7373	0.21228	0.654277
	0.336445	0.271773	0.296591	5.27931	12.1126	3.50924	4.75676	1.88989	1.82876	2.44976	1.98016	3.64314	3.76871	0.989908	1.55375	0.792561	1.92222	2.21114	1.02034	0.23046	0.840969
	0.401039	0.429872	1.84138	3.03976	11.9643	1.31024	2.57891	1.47003	1.68487	0.500638	2.61434	3.36725	19.0757	0.352988	0.739288	0.432169	1.00041	2.72317	0.842866	0.484371	0.33363
	0.493014	0.527921	0.506128	5.2499	4.2643	1.41056	1.6296	2.06334	1.78125	3.35486	2.00786	1.60431	4.15811	1.05046	1.15255	0.756934	2.83846	1.76862	NA	0.337644	0.659861
	0.179335	0.35537	0.760314	2.84583	2.94207	2.5112	4.77686	1.96158	1.33425	2.18411	3.51445	0.866288	4.76988	0.610116	0.871098	1.30125	4.11465	4.75586	2.05553	0.686473	1.06246
	0.740525	0.354346	0.645725	2.02789	1.3242	4.77283	2.71237	2.23249	2.44581	1.5099	2.44299	3.69715	2.26712	0.703192	2.53888	0.930767	5.75347	3.19297	2.8932	0.643723	0.517384
	0.462437	0.361365	0.41409	1.37793	1.17242	1.50426		2.50408	1.09727	2.85164	3.21494	2.07588	1.81455	0.995048	1.23015	1.76656	1.50111	1.96661	1.72526	0.255389	0.839489
	0.393206	0.110666	0.451962	1.40928	3.79306	1.41718	1.98432	2.90131	1.69627	4.19677	2.94882	2.61753	1.92981	1.53457	0.920831	0.319228	4.96713	2.47467	0.935431	0.37559	1.07204
	0.666666	0.520115	0.152603	1.19052	2.7178	4.02854	1.43598	3.06773	2.00989	1.65739	1.81321	3.75949	2.91566	0.829552	0.988651	1.34257	4.87147	3.933	2.11016	0.35573	0.579725
	0.825277	0.226811	0.469193	1.22265	4.69085	2.35594	1.52894	3.7472	4.55353	1.37174		4.22719	3.56086	2.34781	0.604929	0.735729	1.39755	2.96292	4.52436	0.99216	0.595345
	0.217592	0.572943	0.856824	1.42631	6.2748	2.23396	0.787013	2.7235	2.80377	1.91995		5.0978	3.7276	1.62489	0.179557	0.605206	4.44972	3.46495	2.52262	0.620774	1.4788
	0.287925	0.246975	0.577296		1.30163	1.83505	2.36666	3.15507	3.73242	1.91758		2.77895	9.29788	0.600549	1.0398	0.457705	3.47347	3.37647	2.76745	0.165794	0.753927
	0.5095	0.277872	0.495575		2.05609	1.54052	1.20226	1.0031	2.55542	2.25701		3.41031	3.32053	1.3416	1.10765	1.11754	2.41571		1.61139	0.25507	0.628775
	0.294983	0.0927171	0.672266		1.95056	2.01535	2.63841	2.94917	3.27651	1.86366		2.32468	2.07302	1.84472	1.39148	0.24142	3.54097		4.35603	0.42664	2.02893
		0.309502	0.60055		1.75018	3.88652	4.66219	3.48311	1.40586	2.05197		3.96968	2.54032		0.783475	0.582277	3.45398		2.91073	0.757155	0.67761
		0.457659	0.25211		1.19183	2.8803	3.36805	3.30054	1.60977	2.14553		1.7124	4.22807		0.947128		4.39761		1.30206	0.240938	0.818173
		0.140987	0.535999		5.71984	2.03152	2.39593	4.5822	5.7998	1.0232		1.61038	3.38203		1.5068		1.7442		4.85383	0.4089	0.502257
		0.16617	1.05407		6.71578	0.789996	3.02548	3.41628	4.20976	1.61384		3.14118	8.74038		0.9549		3.77811		7.95244	0.350222	1.02366
			0.173473		1.60198	2.11636	3.33428	1.80468	4.49037	1.67324		3.90845	17.5323		0.80759		6.24865		2.28255	0.425108	0.505977
			0.398325			3.12731	2.37936	2.02035	2.29271	2.38698		4.92716	6.53263		2.15837		4.72163		2.84498	0.838699	1.1716
			0.715956		5.60518	2.5753	1.20308	2.76701	4.23073	3.84521		3.87272	9.46285		0.751077		2.92961			0.475091	0.265882
			0.655837		1.72218	2.67411	1.99144	3.73137		2.75651		2.41619	4.37778		2.25573		4.13893			0.10938	1.29107
			0.295356		8.56889	1.45476	2.80738	1.99869		3.04974		5.29609			0.468041		3.76257			0.787995	1.25836
			0.654938		4.93266		0.450315			1.09854		1.61174			0.855477					0.0542165	0.93577
			0.471519		2.47158		1.51275			1.91906		3.0015			0.703485					0.485344	0.79777
			1.07495		4.67976		5.72853			2.31017		1.59018			0.862015					0.106001	0.768586
			0.794611		4.39529		1.74331			1.16434		3.20604			0.977212					0.260161	0.940921
			0.956636		3.95861					2.6689		5.85807			0.707844						0.696977
			2.18041		1.97371					1.99327		4.36381			0.366831						0.992179
			0.475415		11.3252					2.40841		3.00476			1.32082						0.718407
			1.09056		8.30386							1.69237			1.32775						0.889236
			0.562522		2.65132							2.65456			0.645859						0.913969
			0.643358		3.0102							1.32257			0.639102
			0.437807									2.12754			1.00998
			1.56401									1.59834			1.49129
			2.75973									2.11453			1.49958
			0.0421653									1.89025			1.61754
			0.869299									3.69141			1.01741
			1.06996												0.106474
															0.614458
															1.48714
															0.94277
															0.411143
															1.38748
															1.20643
															0.781732
															1.63323
															1.67589
															0.993084
															1.17884
															1.29318
															0.551705
															2.19715
															1.61148
															0.296226
															1.65468
															1.44976

## Sheet: Esc1
Esc1-GFP						1								2								3								4								5								6
						Ic				Ir		Ibg		Ic				Ir		Ibg		Ic				Ir		Ibg		Ic				Ir		Ibg		Ic				Ir		Ibg		Ic
							292.707				393.627		167.576		306.433				384.091		168.044		362.289				272.827		156.334		241.331				320.905		203.491		241.959				278.528		196.837		246.681
							125.131								138.389								205.955								37.8404								45.1211								45.6639
	average	median	SEM	n		Relative accumulation (RA)					226.051			Relative accumulation (RA)					216.047			Relative accumulation (RA)					116.493			Relative accumulation (RA)					117.414			Relative accumulation (RA)					81.6903			Relative accumulation (RA)
RA:	0.557538	0.401039	0.0780578	25		0.553551								0.64055								1.76796								0.322283								0.552344								0.327005
	p-value
	0.000400809
						15.11.13_visst_Esc1-GFP_TRs6.12_03_Crop_1GFP_x_lc	15.11.13_visst_Esc1-GFP_TRs6.12_03_Crop_1GFP_y_lc	15.11.13_visst_Esc1-GFP_TRs6.12_03_Crop_1mCh_x_cap	15.11.13_visst_Esc1-GFP_TRs6.12_03_Crop_1mCh_y_cap	15.11.13_visst_Esc1-GFP_TRs6.12_03_Crop_1GFP_x_lr	15.11.13_visst_Esc1-GFP_TRs6.12_03_Crop_1GFP_y_lr	15.11.13_visst_Esc1-GFP_TRs6.12_03_Crop_1GFP_x_bg	15.11.13_visst_Esc1-GFP_TRs6.12_03_Crop_1GFP_y_bg	15.11.13_visst_Esc1-GFP_TRs6.12_03_Crop_2GFP_x_lc	15.11.13_visst_Esc1-GFP_TRs6.12_03_Crop_2GFP_y_lc	15.11.13_visst_Esc1-GFP_TRs6.12_03_Crop_2mCh_x_cap	15.11.13_visst_Esc1-GFP_TRs6.12_03_Crop_2mCh_y_cap	15.11.13_visst_Esc1-GFP_TRs6.12_03_Crop_2GFP_x_lr	15.11.13_visst_Esc1-GFP_TRs6.12_03_Crop_2GFP_y_lr	15.11.13_visst_Esc1-GFP_TRs6.12_03_Crop_2GFP_x_bg	15.11.13_visst_Esc1-GFP_TRs6.12_03_Crop_2GFP_y_bg	15.11.13_visst_Esc1-GFP_TRs6.12_04_Crop_1GFP_x_lc	15.11.13_visst_Esc1-GFP_TRs6.12_04_Crop_1GFP_y_lc	15.11.13_visst_Esc1-GFP_TRs6.12_04_Crop_1mCh_x_cap	15.11.13_visst_Esc1-GFP_TRs6.12_04_Crop_1mCh_y_cap	15.11.13_visst_Esc1-GFP_TRs6.12_04_Crop_1GFP_x_lr	15.11.13_visst_Esc1-GFP_TRs6.12_04_Crop_1GFP_y_lr	15.11.13_visst_Esc1-GFP_TRs6.12_04_Crop_1GFP_x_bg	15.11.13_visst_Esc1-GFP_TRs6.12_04_Crop_1GFP_y_bg	15.11.13_visst_Esc1-GFP_TRs6.12_05_Crop_1GFP_x_lc	15.11.13_visst_Esc1-GFP_TRs6.12_05_Crop_1GFP_y_lc	15.11.13_visst_Esc1-GFP_TRs6.12_05_Crop_1mCh_x_cap	15.11.13_visst_Esc1-GFP_TRs6.12_05_Crop_1mCh_y_cap	15.11.13_visst_Esc1-GFP_TRs6.12_05_Crop_1GFP_x_lr	15.11.13_visst_Esc1-GFP_TRs6.12_05_Crop_1GFP_y_lr	15.11.13_visst_Esc1-GFP_TRs6.12_05_Crop_1GFP_x_bg	15.11.13_visst_Esc1-GFP_TRs6.12_05_Crop_1GFP_y_bg	15.11.13_visst_Esc1-GFP_TRs6.12_05_Crop_2GFP_x_lc	15.11.13_visst_Esc1-GFP_TRs6.12_05_Crop_2GFP_y_lc	15.11.13_visst_Esc1-GFP_TRs6.12_05_Crop_2mCh_x_cap	15.11.13_visst_Esc1-GFP_TRs6.12_05_Crop_2mCh_y_cap	15.11.13_visst_Esc1-GFP_TRs6.12_05_Crop_2GFP_x_lr	15.11.13_visst_Esc1-GFP_TRs6.12_05_Crop_2GFP_y_lr	15.11.13_visst_Esc1-GFP_TRs6.12_05_Crop_2GFP_x_bg	15.11.13_visst_Esc1-GFP_TRs6.12_05_Crop_2GFP_y_bg	15.11.13_visst_Esc1-GFP_TRs6.12_06_Crop_1GFP_x_lc	15.11.13_visst_Esc1-GFP_TRs6.12_06_Crop_1GFP_y_lc	15.11.13_visst_Esc1-GFP_TRs6.12_06_Crop_1mCh_x_cap	15.11.13_visst_Esc1-GFP_TRs6.12_06_Crop_1mCh_y_cap
					1	0	290	0	1991	0	369	0	162	0	296	0	1345	0	310	0	180	0	500	0	2821	0	356	0	160	0	319	0	764	0	431	0	198	0	292	0	27	0	265	0	177	0	338	0	351
					2	0.064	303.156	0.064	3206.12	0.064	444.999	0.064	172.17	0.064	266.52	0.064	1579.16	0.064	337.962	0.064	179.024	0.064	442.582	0.064	2985.05	0.064	321.25	0.064	163.524	0.064	300	0.064	814	0.064	443.906	0.064	180.488	0.064	287.12	0.064	50.92	0.064	217.768	0.064	192.803	0.064	302.623	0.064	401.11
					3	0.128	314.038	0.128	4306.83	0.128	478.232	0.128	167.218	0.128	284.64	0.128	1678.8	0.128	368.679	0.128	174.37	0.128	364.115	0.128	2843.28	0.128	293.884	0.128	163.779	0.128	288	0.128	894	0.128	416.856	0.128	176.485	0.128	264.48	0.128	68.08	0.128	206.528	0.128	187.851	0.128	271.575	0.128	425.322
					4	0.192	302.523	0.192	5126.16	0.192	447.609	0.192	161.265	0.192	315.96	0.192	1644.12	0.192	393.541	0.192	163.153	0.192	337.899	0.192	2544.47	0.192	269.575	0.192	165.296	0.192	258	0.192	985	0.192	406.445	0.192	186.102	0.192	250.8	0.192	86.44	0.192	225.871	0.192	188.116	0.192	237.026	0.192	438.154
					5	0.256	277.306	0.256	5630.95	0.256	423.877	0.256	168.205	0.256	324.08	0.256	1593.44	0.256	409.667	0.256	157.962	0.256	306.939	0.256	2255.86	0.256	235.784	0.256	168.376	0.256	235	0.256	991	0.256	351.927	0.256	214.504	0.256	228.88	0.256	96.8	0.256	226.963	0.256	196.407	0.256	234.333	0.256	445.158
					6	0.32	248.905	0.32	5495.36	0.32	389.851	0.32	173.745	0.32	334	0.32	1646	0.32	444.979	0.32	164.695	0.32	278.902	0.32	2132.9	0.32	233.095	0.32	165.53	0.32	240	0.32	1023	0.32	289.515	0.32	225.856	0.32	208	0.32	82	0.32	257.219	0.32	186.977	0.32	267.887	0.32	471.751
					7	0.384	226.622	0.384	5289.12	0.384	341.175	0.384	169.211	0.384	317.967	0.384	1603.02	0.384	474.361	0.384	180.542	0.384	291.697	0.384	2101.91	0.384	249.954	0.384	159.294	0.384	234	0.384	1019	0.384	268.61	0.384	208.055	0.384	213.08	0.384	122.512	0.384	294.155	0.384	190.224	0.384	264.575	0.384	504.38
					8	0.448	231.171	0.448	4506.9	0.448	292.981	0.448	170.715	0.448	326.984	0.448	1491.11	0.448	476.32	0.448	180.872	0.448	295.221	0.448	1886.92	0.448	264.529	0.448	155.186	0.448	210	0.448	955	0.448	249.545	0.448	195.691	0.448	201.95	0.448	166.713	0.448	298.372	0.448	192.725	0.448	270.387	0.448	487.848
					9	0.512	252.17	0.512	3643.33	0.512	273.329	0.512	168.258	0.512	310.638	0.512	1330.07	0.512	444.184	0.512	177.143	0.512	280.268	0.512	1625.84	0.512	293.424	0.512	155.07	0.512	198	0.512	888	0.512	219.935	0.512	201.25	0.512	206.454	0.512	203.593	0.512	277.659	0.512	203.051	0.512	308.227	0.512	465.302
					10	0.576	287.427	0.576	2874.05	0.576	289.24	0.576	163.936	0.576	308.517	0.576	1191.44	0.576	410.947	0.576	184.212	0.576	292.372	0.576	1361.34	0.576	342.403	0.576	151.341	0.576	207	0.576	811	0.576	205.074	0.576	201.6	0.576	202.217	0.576	199.378	0.576	254.414	0.576	221.215	0.576	308.332	0.576	420.121
					11	0.64	310.095	0.64	2463.8	0.64	292.82	0.64	170.526	0.64	308.2	0.64	1097.85	0.64	344.033	0.64	183.795	0.64	311.726	0.64	1057.65	0.64	364.659	0.64	161.372	0.64	213.222	0.64	972.44	0.64	203.152	0.64	203.065	0.64	178.88	0.64	176.58	0.64	245.228	0.64	219.426	0.64	293.296	0.64	374.526
					12	0.704	328.748	0.704	2187.26	0.704	290.72	0.704	178.95	0.704	300.126	0.704	1019.37	0.704	296.845	0.704	179.829	0.704	316.697	0.704	769.743	0.704	372.268	0.704	167.34	0.704	216.917	0.704	969.454	0.704	213.467	0.704	191.622	0.704	198.208	0.704	146.619	0.704	253.623	0.704	217.788	0.704	253.948	0.704	321.628
					13	0.768	362.388	0.768	1920.03	0.768	303.2	0.768	175.27	0.768	301.265	0.768	924.128	0.768	290.428	0.768	178.604	0.768	338.167	0.768	721.226	0.768	369.431	0.768	165.972	0.768	214.996	0.768	910.789	0.768	242.002	0.768	188.915	0.768	232.684	0.768	111.513	0.768	259.828	0.768	203.545	0.768	214.711	0.768	255.852
					14	0.832	363.346	0.832	1548.88	0.832	320.62	0.832	164.151	0.832	295.162	0.832	765.668	0.832	319.065	0.832	181.577	0.832	371.043	0.832	695.896	0.832	345.542	0.832	156.709	0.832	228.328	0.832	839.386	0.832	281.197	0.832	193.088	0.832	272.414	0.832	216.963	0.832	244.58	0.832	187.441	0.832	201.346	0.832	200.989
					15	NA	NA	NA	NA	0.896	297.86	0.896	159.209	NA	NA	NA	NA	0.896	335.965	0.896	171.893	0.896	405.234	0.896	663.318	0.896	284.367	0.896	153.581	0.896	238.315	0.896	677.137	0.896	335.212	0.896	203.823	0.896	285.316	0.896	275.084	0.896	222.459	0.896	181.715	0.896	209.272	0.896	244.873
					16	NA	NA	NA	NA	0.96	280.06	0.96	140.256	NA	NA	NA	NA	0.96	359.587	0.96	161.725	0.96	442.622	0.96	781.872	0.96	256.123	0.96	147.162	0.96	247.389	0.96	480.999	0.96	443.79	0.96	200.209	0.96	296.532	0.96	342.994	0.96	209.921	0.96	181.712	0.96	210.915	0.96	268.528
					17	NA	NA	NA	NA	1.024	281.84	1.024	150.143	NA	NA	NA	NA	1.024	361.829	1.024	172.756	1.024	467.765	1.024	833.388	1.024	247.29	1.024	150.664	1.024	245.62	1.024	317.166	1.024	510.29	1.024	197.276	1.024	294.28	1.024	353.834	1.024	211.072	1.024	186.454	1.024	206.486	1.024	268.273
					18	NA	NA	NA	NA	1.088	295.6	1.088	178.174	NA	NA	NA	NA	1.088	313.966	1.088	190.777	1.088	432.083	1.088	857.507	1.088	255.402	1.088	155.057	1.088	250.177	1.088	216.136	1.088	478.73	1.088	194.701	NA	NA	NA	NA	1.088	225.192	1.088	190.582	1.088	213.871	1.088	263.457
					19	NA	NA	NA	NA	1.152	305.31	1.152	170.855	NA	NA	NA	NA	1.152	275.836	1.152	177.02	1.152	408.159	1.152	800.696	1.152	276.971	1.152	156.826	NA	NA	NA	NA	1.152	391.23	1.152	198.288	NA	NA	NA	NA	1.152	243.13	1.152	201.512	1.152	213.07	1.152	274.13
					20	NA	NA	NA	NA	1.216	320.18	1.216	157.955	NA	NA	NA	NA	1.216	251.979	1.216	164.069	NA	NA	NA	NA	1.216	286.515	1.216	160.427	NA	NA	NA	NA	1.216	360.53	1.216	201.089	NA	NA	NA	NA	1.216	267.249	1.216	199.7	1.216	205.235	1.216	245.287
					21	NA	NA	NA	NA	1.28	327.756	1.28	156.527	NA	NA	NA	NA	1.28	248.162	1.28	165.185	NA	NA	NA	NA	1.28	271.886	1.28	165.225	NA	NA	NA	NA	1.28	304.6	1.28	198.725	NA	NA	NA	NA	1.28	282.913	1.28	213.068	1.28	202.507	1.28	217.974
					22	NA	NA	NA	NA	1.344	321.574	1.344	175.501	NA	NA	NA	NA	1.344	271.377	1.344	168.903	NA	NA	NA	NA	1.344	257.227	1.344	162.285	NA	NA	NA	NA	1.344	261.51	1.344	189.336	NA	NA	NA	NA	1.344	276.274	1.344	210.007	1.344	199.352	1.344	206.349
					23	NA	NA	NA	NA	1.408	323.93	1.408	180.912	NA	NA	NA	NA	1.408	325.341	1.408	172.852	NA	NA	NA	NA	1.408	251.834	1.408	157.049	NA	NA	NA	NA	1.408	284.59	1.408	172.85	NA	NA	NA	NA	1.408	272.684	1.408	202.569	NA	NA	NA	NA
					24	NA	NA	NA	NA	1.472	335.621	1.472	180.04	NA	NA	NA	NA	1.472	410.374	1.472	167.841	NA	NA	NA	NA	1.472	267.458	1.472	166.787	NA	NA	NA	NA	1.472	325.38	1.472	182.914	NA	NA	NA	NA	1.472	285.188	1.472	209.529	NA	NA	NA	NA
					25	NA	NA	NA	NA	1.536	316.155	1.536	164.137	NA	NA	NA	NA	1.536	505.578	1.536	155.609	NA	NA	NA	NA	1.536	280.808	1.536	168.942	NA	NA	NA	NA	1.536	357.59	1.536	190.215	NA	NA	NA	NA	1.536	296.306	1.536	216.126	NA	NA	NA	NA
					26	NA	NA	NA	NA	1.6	301.939	1.6	181.667	NA	NA	NA	NA	1.6	561.559	1.6	154.996	NA	NA	NA	NA	1.6	250.331	1.6	166.215	NA	NA	NA	NA	1.6	391.26	1.6	191.912	NA	NA	NA	NA	1.6	289.133	1.6	203.893	NA	NA	NA	NA
					27	NA	NA	NA	NA	1.664	308.982	1.664	188.787	NA	NA	NA	NA	1.664	518.624	1.664	164.39	NA	NA	NA	NA	1.664	241.694	1.664	164.566	NA	NA	NA	NA	1.664	396.952	1.664	182.855	NA	NA	NA	NA	1.664	266.858	1.664	190.643	NA	NA	NA	NA
					28	NA	NA	NA	NA	1.728	303.177	1.728	170.982	NA	NA	NA	NA	1.728	456.919	1.728	181.404	NA	NA	NA	NA	1.728	241.389	1.728	161.348	NA	NA	NA	NA	1.728	376.646	1.728	190.782	NA	NA	NA	NA	1.728	272.13	1.728	182.919	NA	NA	NA	NA
					29	NA	NA	NA	NA	1.792	302.694	1.792	161.451	NA	NA	NA	NA	1.792	477.097	1.792	180.243	NA	NA	NA	NA	1.792	243.046	1.792	160.364	NA	NA	NA	NA	1.792	343.061	1.792	197.222	NA	NA	NA	NA	1.792	316.461	1.792	189.191	NA	NA	NA	NA
					30	NA	NA	NA	NA	1.856	298.431	1.856	153.689	NA	NA	NA	NA	1.856	441.979	1.856	171.24	NA	NA	NA	NA	1.856	244.123	1.856	162.941	NA	NA	NA	NA	1.856	324.617	1.856	195.676	NA	NA	NA	NA	1.856	339.166	1.856	195.692	NA	NA	NA	NA
					31	NA	NA	NA	NA	1.92	307.112	1.92	161.395	NA	NA	NA	NA	1.92	397.766	1.92	168.667	NA	NA	NA	NA	1.92	226.533	1.92	169.128	NA	NA	NA	NA	1.92	315.076	1.92	188.251	NA	NA	NA	NA	1.92	365.241	1.92	212.075	NA	NA	NA	NA
					32	NA	NA	NA	NA	1.984	356.736	1.984	167.725	NA	NA	NA	NA	1.984	368.532	1.984	169.497	NA	NA	NA	NA	1.984	240.02	1.984	174.48	NA	NA	NA	NA	1.984	317.621	1.984	195.259	NA	NA	NA	NA	1.984	373.065	1.984	214.076	NA	NA	NA	NA
					33	NA	NA	NA	NA	2.048	421.734	2.048	169.299	NA	NA	NA	NA	2.048	367.919	2.048	170.481	NA	NA	NA	NA	2.048	247.34	2.048	171.093	NA	NA	NA	NA	2.048	321.199	2.048	191.123	NA	NA	NA	NA	2.048	388.441	2.048	191.08	NA	NA	NA	NA
					34	NA	NA	NA	NA	2.112	464.645	2.112	159.96	NA	NA	NA	NA	2.112	327.076	2.112	164.586	NA	NA	NA	NA	2.112	262.24	2.112	167.895	NA	NA	NA	NA	2.112	332.042	2.112	181.615	NA	NA	NA	NA	2.112	408.806	2.112	190.215	NA	NA	NA	NA
					35	NA	NA	NA	NA	2.176	486.798	2.176	146.722	NA	NA	NA	NA	2.176	290.318	2.176	173.6	NA	NA	NA	NA	2.176	306.72	2.176	152.361	NA	NA	NA	NA	2.176	319.286	2.176	197.675	NA	NA	NA	NA	2.176	400.005	2.176	193.503	NA	NA	NA	NA
					36	NA	NA	NA	NA	2.24	529.159	2.24	144.855	NA	NA	NA	NA	2.24	271.074	2.24	175.459	NA	NA	NA	NA	2.24	343.15	2.24	146.987	NA	NA	NA	NA	2.24	286.656	2.24	211.861	NA	NA	NA	NA	2.24	359.088	2.24	189.264	NA	NA	NA	NA
					37	NA	NA	NA	NA	2.304	540.224	2.304	162.893	NA	NA	NA	NA	2.304	267.42	2.304	179.534	NA	NA	NA	NA	2.304	325.64	2.304	152.415	NA	NA	NA	NA	2.304	278.311	2.304	218.638	NA	NA	NA	NA	2.304	309.037	2.304	182.711	NA	NA	NA	NA
					38	NA	NA	NA	NA	2.368	495.598	2.368	167.794	NA	NA	NA	NA	2.368	266.088	2.368	176.324	NA	NA	NA	NA	2.368	301.001	2.368	166.114	NA	NA	NA	NA	2.368	303.582	2.368	204.881	NA	NA	NA	NA	2.368	277.377	2.368	184.882	NA	NA	NA	NA
					39	NA	NA	NA	NA	2.432	462.015	2.432	170.58	NA	NA	NA	NA	2.432	261.636	2.432	157.471	NA	NA	NA	NA	2.432	301.041	2.432	164.467	NA	NA	NA	NA	2.432	332.969	2.432	202.559	NA	NA	NA	NA	2.432	260.085	2.432	196.735	NA	NA	NA	NA
					40	NA	NA	NA	NA	2.496	453.665	2.496	181.196	NA	NA	NA	NA	2.496	264.894	2.496	146.744	NA	NA	NA	NA	2.496	288.011	2.496	159.525	NA	NA	NA	NA	2.496	366.971	2.496	217.108	NA	NA	NA	NA	2.496	252.463	2.496	203.218	NA	NA	NA	NA
					41	NA	NA	NA	NA	2.56	469.889	2.56	174.267	NA	NA	NA	NA	2.56	269.539	2.56	149.592	NA	NA	NA	NA	2.56	254.8	2.56	164.398	NA	NA	NA	NA	2.56	394.059	2.56	223.786	NA	NA	NA	NA	2.56	250.097	2.56	198.201	NA	NA	NA	NA
					42	NA	NA	NA	NA	2.624	490.722	2.624	177.199	NA	NA	NA	NA	2.624	289.654	2.624	148.671	NA	NA	NA	NA	2.624	234.8	2.624	163.933	NA	NA	NA	NA	2.624	390.134	2.624	221.526	NA	NA	NA	NA	2.624	222.202	2.624	197.992	NA	NA	NA	NA
					43	NA	NA	NA	NA	2.688	549.728	2.688	190.943	NA	NA	NA	NA	2.688	323.934	2.688	145.502	NA	NA	NA	NA	2.688	217.741	2.688	178.351	NA	NA	NA	NA	2.688	372.125	2.688	218.538	NA	NA	NA	NA	2.688	225.852	2.688	200.775	NA	NA	NA	NA
					44	NA	NA	NA	NA	2.752	609.725	2.752	182.938	NA	NA	NA	NA	2.752	355.341	2.752	164.931	NA	NA	NA	NA	2.752	198.087	2.752	189.752	NA	NA	NA	NA	2.752	373.117	2.752	215.917	NA	NA	NA	NA	2.752	240.78	2.752	195.059	NA	NA	NA	NA
					45	NA	NA	NA	NA	2.816	593	2.816	157.581	NA	NA	NA	NA	2.816	379.135	2.816	179.963	NA	NA	NA	NA	2.816	199.025	2.816	177.543	NA	NA	NA	NA	2.816	361.744	2.816	213.699	NA	NA	NA	NA	2.816	249.145	2.816	193.382	NA	NA	NA	NA
					46	NA	NA	NA	NA	2.88	574.058	2.88	148.12	NA	NA	NA	NA	2.88	377.307	2.88	176.978	NA	NA	NA	NA	2.88	204.722	2.88	161.229	NA	NA	NA	NA	2.88	359.993	2.88	210.032	NA	NA	NA	NA	2.88	240.124	2.88	194.614	NA	NA	NA	NA
					47	NA	NA	NA	NA	2.944	539.571	2.944	153.285	NA	NA	NA	NA	2.944	358.679	2.944	172.113	NA	NA	NA	NA	2.944	203.757	2.944	153.733	NA	NA	NA	NA	2.944	323.633	2.944	223.861	NA	NA	NA	NA	2.944	230.504	2.944	187.055	NA	NA	NA	NA
					48	NA	NA	NA	NA	3.008	509.084	3.008	164.403	NA	NA	NA	NA	3.008	402.52	3.008	178.52	NA	NA	NA	NA	NA	NA	3.008	142.616	NA	NA	NA	NA	3.008	303.788	3.008	228.212	NA	NA	NA	NA	3.008	213.423	3.008	189.692	NA	NA	NA	NA
					49	NA	NA	NA	NA	3.072	469.053	3.072	148.415	NA	NA	NA	NA	3.072	433.68	3.072	176.069	NA	NA	NA	NA	NA	NA	3.072	132.924	NA	NA	NA	NA	3.072	309.299	3.072	226.254	NA	NA	NA	NA	3.072	213.485	3.072	183.022	NA	NA	NA	NA
					50	NA	NA	NA	NA	3.136	416.348	3.136	145.391	NA	NA	NA	NA	3.136	438	3.136	159.771	NA	NA	NA	NA	NA	NA	3.136	137.138	NA	NA	NA	NA	3.136	302.813	3.136	223.707	NA	NA	NA	NA	3.136	205.674	3.136	169.707	NA	NA	NA	NA
					51	NA	NA	NA	NA	3.2	391.746	3.2	153.92	NA	NA	NA	NA	3.2	422.88	3.2	151.127	NA	NA	NA	NA	NA	NA	3.2	143.159	NA	NA	NA	NA	3.2	316.042	3.2	206.993	NA	NA	NA	NA	3.2	210.4	3.2	170.082	NA	NA	NA	NA
					52	NA	NA	NA	NA	3.264	408.711	3.264	172.703	NA	NA	NA	NA	3.264	388.08	3.264	144.359	NA	NA	NA	NA	NA	NA	3.264	148.848	NA	NA	NA	NA	3.264	321.214	3.264	202.267	NA	NA	NA	NA	3.264	241.002	3.264	187.834	NA	NA	NA	NA
					53	NA	NA	NA	NA	3.328	444.151	3.328	186.726	NA	NA	NA	NA	3.328	374.44	3.328	151.864	NA	NA	NA	NA	NA	NA	3.328	158.559	NA	NA	NA	NA	3.328	303.111	3.328	202.044	NA	NA	NA	NA	3.328	288.081	3.328	207.663	NA	NA	NA	NA
					54	NA	NA	NA	NA	NA	NA	3.392	180.69	NA	NA	NA	NA	3.392	414.16	3.392	153.938	NA	NA	NA	NA	NA	NA	3.392	163.821	NA	NA	NA	NA	3.392	270.717	3.392	221.736	NA	NA	NA	NA	3.392	305.071	3.392	210.035	NA	NA	NA	NA
					55	NA	NA	NA	NA	NA	NA	3.456	169.757	NA	NA	NA	NA	3.456	464	3.456	155.459	NA	NA	NA	NA	NA	NA	3.456	154.82	NA	NA	NA	NA	3.456	236.29	3.456	235.494	NA	NA	NA	NA	3.456	281.26	3.456	205.677	NA	NA	NA	NA
					56	NA	NA	NA	NA	NA	NA	3.52	156.604	NA	NA	NA	NA	3.52	473.68	3.52	159.883	NA	NA	NA	NA	NA	NA	3.52	144.937	NA	NA	NA	NA	3.52	226.339	3.52	227.718	NA	NA	NA	NA	3.52	250.89	3.52	207.747	NA	NA	NA	NA
					57	NA	NA	NA	NA	NA	NA	3.584	159.708	NA	NA	NA	NA	3.584	451.509	3.584	162.857	NA	NA	NA	NA	NA	NA	3.584	147.45	NA	NA	NA	NA	3.584	233.209	3.584	231.087	NA	NA	NA	NA	3.584	249.56	3.584	211.53	NA	NA	NA	NA
					58	NA	NA	NA	NA	NA	NA	3.648	173.618	NA	NA	NA	NA	3.648	429.934	3.648	169.897	NA	NA	NA	NA	NA	NA	3.648	152.35	NA	NA	NA	NA	3.648	260.387	3.648	252.196	NA	NA	NA	NA	3.648	247.21	3.648	210.696	NA	NA	NA	NA
					59	NA	NA	NA	NA	NA	NA	3.712	172.484	NA	NA	NA	NA	3.712	452.322	3.712	175.828	NA	NA	NA	NA	NA	NA	3.712	157.641	NA	NA	NA	NA	3.712	270.693	3.712	267.736	NA	NA	NA	NA	3.712	257	3.712	209.879	NA	NA	NA	NA
					60	NA	NA	NA	NA	NA	NA	3.776	160.504	NA	NA	NA	NA	3.776	495.075	3.776	172.412	NA	NA	NA	NA	NA	NA	3.776	158.807	NA	NA	NA	NA	3.776	275.604	3.776	251.185	NA	NA	NA	NA	3.776	256.56	3.776	208.387	NA	NA	NA	NA
					61	NA	NA	NA	NA	NA	NA	3.84	157.779	NA	NA	NA	NA	3.84	508.328	3.84	169.031	NA	NA	NA	NA	NA	NA	3.84	157.786	NA	NA	NA	NA	3.84	276.146	3.84	217.837	NA	NA	NA	NA	3.84	255.074	3.84	202.912	NA	NA	NA	NA
					62	NA	NA	NA	NA	NA	NA	3.904	159.801	NA	NA	NA	NA	3.904	490.711	3.904	180.525	NA	NA	NA	NA	NA	NA	3.904	152.564	NA	NA	NA	NA	3.904	277.262	3.904	185.572	NA	NA	NA	NA	3.904	275.584	3.904	184.337	NA	NA	NA	NA
					63	NA	NA	NA	NA	NA	NA	3.968	163.539	NA	NA	NA	NA	3.968	471.184	3.968	187.387	NA	NA	NA	NA	NA	NA	3.968	154.212	NA	NA	NA	NA	3.968	293.582	3.968	175.901	NA	NA	NA	NA	3.968	297.507	NA	NA	NA	NA	NA	NA
					64	NA	NA	NA	NA	NA	NA	4.032	170.175	NA	NA	NA	NA	4.032	456.829	4.032	175.939	NA	NA	NA	NA	NA	NA	4.032	154.648	NA	NA	NA	NA	4.032	296.528	4.032	177.91	NA	NA	NA	NA	4.032	330.442	NA	NA	NA	NA	NA	NA
					65	NA	NA	NA	NA	NA	NA	4.096	169.2	NA	NA	NA	NA	4.096	456.548	4.096	164	NA	NA	NA	NA	NA	NA	4.096	154.313	NA	NA	NA	NA	4.096	282.708	4.096	177.345	NA	NA	NA	NA	4.096	401.034	NA	NA	NA	NA	NA	NA
					66	NA	NA	NA	NA	NA	NA	4.16	166.48	NA	NA	NA	NA	4.16	457.114	4.16	160.728	NA	NA	NA	NA	NA	NA	4.16	150.076	NA	NA	NA	NA	4.16	286.729	4.16	185.447	NA	NA	NA	NA	4.16	402.642	NA	NA	NA	NA	NA	NA
					67	NA	NA	NA	NA	NA	NA	4.224	169.765	NA	NA	NA	NA	4.224	437.649	4.224	156.007	NA	NA	NA	NA	NA	NA	4.224	145.109	NA	NA	NA	NA	4.224	301.004	4.224	181.957	NA	NA	NA	NA	4.224	395.388	NA	NA	NA	NA	NA	NA
					68	NA	NA	NA	NA	NA	NA	4.288	168.412	NA	NA	NA	NA	4.288	378.629	4.288	168.387	NA	NA	NA	NA	NA	NA	4.288	150.318	NA	NA	NA	NA	NA	NA	4.288	169.862	NA	NA	NA	NA	4.288	396.081	NA	NA	NA	NA	NA	NA
					69	NA	NA	NA	NA	NA	NA	4.352	172.126	NA	NA	NA	NA	4.352	379.815	4.352	169.232	NA	NA	NA	NA	NA	NA	4.352	156.769	NA	NA	NA	NA	NA	NA	NA	NA	NA	NA	NA	NA	4.352	389.385	NA	NA	NA	NA	NA	NA
					70	NA	NA	NA	NA	NA	NA	4.416	176.115	NA	NA	NA	NA	4.416	405.41	4.416	168.834	NA	NA	NA	NA	NA	NA	4.416	154.705	NA	NA	NA	NA	NA	NA	NA	NA	NA	NA	NA	NA	NA	NA	NA	NA	NA	NA	NA	NA
					71	NA	NA	NA	NA	NA	NA	4.48	162.322	NA	NA	NA	NA	4.48	415.81	4.48	165.08	NA	NA	NA	NA	NA	NA	4.48	153.216	NA	NA	NA	NA	NA	NA	NA	NA	NA	NA	NA	NA	NA	NA	NA	NA	NA	NA	NA	NA
					72	NA	NA	NA	NA	NA	NA	4.544	182.475	NA	NA	NA	NA	4.544	395.42	4.544	160.117	NA	NA	NA	NA	NA	NA	4.544	154.08	NA	NA	NA	NA	NA	NA	NA	NA	NA	NA	NA	NA	NA	NA	NA	NA	NA	NA	NA	NA
					73	NA	NA	NA	NA	NA	NA	4.608	178.132	NA	NA	NA	NA	4.608	356.97	4.608	164.368	NA	NA	NA	NA	NA	NA	4.608	151.676	NA	NA	NA	NA	NA	NA	NA	NA	NA	NA	NA	NA	NA	NA	NA	NA	NA	NA	NA	NA
					74	NA	NA	NA	NA	NA	NA	4.672	169.231	NA	NA	NA	NA	4.672	298.54	4.672	171.617	NA	NA	NA	NA	NA	NA	4.672	153.246	NA	NA	NA	NA	NA	NA	NA	NA	NA	NA	NA	NA	NA	NA	NA	NA	NA	NA	NA	NA
					75	NA	NA	NA	NA	NA	NA	4.736	171.994	NA	NA	NA	NA	NA	NA	4.736	171.603	NA	NA	NA	NA	NA	NA	4.736	155.05	NA	NA	NA	NA	NA	NA	NA	NA	NA	NA	NA	NA	NA	NA	NA	NA	NA	NA	NA	NA
					76	NA	NA	NA	NA	NA	NA	4.8	162.908	NA	NA	NA	NA	NA	NA	4.8	165.145	NA	NA	NA	NA	NA	NA	4.8	147.571	NA	NA	NA	NA	NA	NA	NA	NA	NA	NA	NA	NA	NA	NA	NA	NA	NA	NA	NA	NA
					77	NA	NA	NA	NA	NA	NA	4.864	164.687	NA	NA	NA	NA	NA	NA	4.864	166.766	NA	NA	NA	NA	NA	NA	4.864	132.703	NA	NA	NA	NA	NA	NA	NA	NA	NA	NA	NA	NA	NA	NA	NA	NA	NA	NA	NA	NA
					78	NA	NA	NA	NA	NA	NA	4.928	173.099	NA	NA	NA	NA	NA	NA	4.928	178.506	NA	NA	NA	NA	NA	NA	4.928	127.349	NA	NA	NA	NA	NA	NA	NA	NA	NA	NA	NA	NA	NA	NA	NA	NA	NA	NA	NA	NA
					79	NA	NA	NA	NA	NA	NA	4.992	174.237	NA	NA	NA	NA	NA	NA	4.992	183.121	NA	NA	NA	NA	NA	NA	4.992	127.59	NA	NA	NA	NA	NA	NA	NA	NA	NA	NA	NA	NA	NA	NA	NA	NA	NA	NA	NA	NA
					80	NA	NA	NA	NA	NA	NA	5.056	168.804	NA	NA	NA	NA	NA	NA	5.056	172.169	NA	NA	NA	NA	NA	NA	5.056	140.89	NA	NA	NA	NA	NA	NA	NA	NA	NA	NA	NA	NA	NA	NA	NA	NA	NA	NA	NA	NA
					81	NA	NA	NA	NA	NA	NA	5.12	164.728	NA	NA	NA	NA	NA	NA	5.12	170.45	NA	NA	NA	NA	NA	NA	5.12	144.441	NA	NA	NA	NA	NA	NA	NA	NA	NA	NA	NA	NA	NA	NA	NA	NA	NA	NA	NA	NA
					82	NA	NA	NA	NA	NA	NA	5.184	168.06	NA	NA	NA	NA	NA	NA	5.184	184.281	NA	NA	NA	NA	NA	NA	5.184	132.688	NA	NA	NA	NA	NA	NA	NA	NA	NA	NA	NA	NA	NA	NA	NA	NA	NA	NA	NA	NA
					83	NA	NA	NA	NA	NA	NA	5.248	162.008	NA	NA	NA	NA	NA	NA	5.248	190.952	NA	NA	NA	NA	NA	NA	5.248	128.423	NA	NA	NA	NA	NA	NA	NA	NA	NA	NA	NA	NA	NA	NA	NA	NA	NA	NA	NA	NA
					84	NA	NA	NA	NA	NA	NA	5.312	167.329	NA	NA	NA	NA	NA	NA	5.312	170.788	NA	NA	NA	NA	NA	NA	5.312	135.745	NA	NA	NA	NA	NA	NA	NA	NA	NA	NA	NA	NA	NA	NA	NA	NA	NA	NA	NA	NA
					85	NA	NA	NA	NA	NA	NA	5.376	168.21	NA	NA	NA	NA	NA	NA	5.376	159.066	NA	NA	NA	NA	NA	NA	5.376	150.71	NA	NA	NA	NA	NA	NA	NA	NA	NA	NA	NA	NA	NA	NA	NA	NA	NA	NA	NA	NA
					86	NA	NA	NA	NA	NA	NA	5.44	170.299	NA	NA	NA	NA	NA	NA	5.44	171.273	NA	NA	NA	NA	NA	NA	5.44	165.807	NA	NA	NA	NA	NA	NA	NA	NA	NA	NA	NA	NA	NA	NA	NA	NA	NA	NA	NA	NA
					87	NA	NA	NA	NA	NA	NA	5.504	176.48	NA	NA	NA	NA	NA	NA	5.504	172.986	NA	NA	NA	NA	NA	NA	5.504	175.723	NA	NA	NA	NA	NA	NA	NA	NA	NA	NA	NA	NA	NA	NA	NA	NA	NA	NA	NA	NA
					88	NA	NA	NA	NA	NA	NA	5.568	174.782	NA	NA	NA	NA	NA	NA	5.568	164.573	NA	NA	NA	NA	NA	NA	5.568	174.445	NA	NA	NA	NA	NA	NA	NA	NA	NA	NA	NA	NA	NA	NA	NA	NA	NA	NA	NA	NA
					89	NA	NA	NA	NA	NA	NA	5.632	164.277	NA	NA	NA	NA	NA	NA	5.632	168.491	NA	NA	NA	NA	NA	NA	5.632	156.005	NA	NA	NA	NA	NA	NA	NA	NA	NA	NA	NA	NA	NA	NA	NA	NA	NA	NA	NA	NA
					90	NA	NA	NA	NA	NA	NA	5.696	164.584	NA	NA	NA	NA	NA	NA	5.696	164.019	NA	NA	NA	NA	NA	NA	5.696	148.381	NA	NA	NA	NA	NA	NA	NA	NA	NA	NA	NA	NA	NA	NA	NA	NA	NA	NA	NA	NA
					91	NA	NA	NA	NA	NA	NA	5.76	184.536	NA	NA	NA	NA	NA	NA	5.76	178.403	NA	NA	NA	NA	NA	NA	5.76	166.968	NA	NA	NA	NA	NA	NA	NA	NA	NA	NA	NA	NA	NA	NA	NA	NA	NA	NA	NA	NA
					92	NA	NA	NA	NA	NA	NA	5.824	188.163	NA	NA	NA	NA	NA	NA	5.824	189.022	NA	NA	NA	NA	NA	NA	5.824	165.187	NA	NA	NA	NA	NA	NA	NA	NA	NA	NA	NA	NA	NA	NA	NA	NA	NA	NA	NA	NA
					93	NA	NA	NA	NA	NA	NA	5.888	176.526	NA	NA	NA	NA	NA	NA	5.888	186.995	NA	NA	NA	NA	NA	NA	5.888	168.604	NA	NA	NA	NA	NA	NA	NA	NA	NA	NA	NA	NA	NA	NA	NA	NA	NA	NA	NA	NA
					94	NA	NA	NA	NA	NA	NA	5.952	162.373	NA	NA	NA	NA	NA	NA	5.952	177.134	NA	NA	NA	NA	NA	NA	5.952	170.783	NA	NA	NA	NA	NA	NA	NA	NA	NA	NA	NA	NA	NA	NA	NA	NA	NA	NA	NA	NA
					95	NA	NA	NA	NA	NA	NA	6.016	162.389	NA	NA	NA	NA	NA	NA	6.016	163.596	NA	NA	NA	NA	NA	NA	6.016	162.761	NA	NA	NA	NA	NA	NA	NA	NA	NA	NA	NA	NA	NA	NA	NA	NA	NA	NA	NA	NA
					96	NA	NA	NA	NA	NA	NA	6.08	162.275	NA	NA	NA	NA	NA	NA	6.08	158.172	NA	NA	NA	NA	NA	NA	6.08	160.372	NA	NA	NA	NA	NA	NA	NA	NA	NA	NA	NA	NA	NA	NA	NA	NA	NA	NA	NA	NA
					97	NA	NA	NA	NA	NA	NA	6.144	159.009	NA	NA	NA	NA	NA	NA	6.144	159.157	NA	NA	NA	NA	NA	NA	6.144	151.826	NA	NA	NA	NA	NA	NA	NA	NA	NA	NA	NA	NA	NA	NA	NA	NA	NA	NA	NA	NA
					98	NA	NA	NA	NA	NA	NA	NA	NA	NA	NA	NA	NA	NA	NA	6.208	162.19	NA	NA	NA	NA	NA	NA	6.208	146.16	NA	NA	NA	NA	NA	NA	NA	NA	NA	NA	NA	NA	NA	NA	NA	NA	NA	NA	NA	NA
					99	NA	NA	NA	NA	NA	NA	NA	NA	NA	NA	NA	NA	NA	NA	6.272	163.134	NA	NA	NA	NA	NA	NA	6.272	152.407	NA	NA	NA	NA	NA	NA	NA	NA	NA	NA	NA	NA	NA	NA	NA	NA	NA	NA	NA	NA
					100	NA	NA	NA	NA	NA	NA	NA	NA	NA	NA	NA	NA	NA	NA	6.336	164.052	NA	NA	NA	NA	NA	NA	6.336	161.476	NA	NA	NA	NA	NA	NA	NA	NA	NA	NA	NA	NA	NA	NA	NA	NA	NA	NA	NA	NA
					101	NA	NA	NA	NA	NA	NA	NA	NA	NA	NA	NA	NA	NA	NA	6.4	169.415	NA	NA	NA	NA	NA	NA	6.4	165.038	NA	NA	NA	NA	NA	NA	NA	NA	NA	NA	NA	NA	NA	NA	NA	NA	NA	NA	NA	NA
					102	NA	NA	NA	NA	NA	NA	NA	NA	NA	NA	NA	NA	NA	NA	6.464	159.785	NA	NA	NA	NA	NA	NA	6.464	158.591	NA	NA	NA	NA	NA	NA	NA	NA	NA	NA	NA	NA	NA	NA	NA	NA	NA	NA	NA	NA
					103	NA	NA	NA	NA	NA	NA	NA	NA	NA	NA	NA	NA	NA	NA	6.528	149.018	NA	NA	NA	NA	NA	NA	6.528	147.464	NA	NA	NA	NA	NA	NA	NA	NA	NA	NA	NA	NA	NA	NA	NA	NA	NA	NA	NA	NA
					104	NA	NA	NA	NA	NA	NA	NA	NA	NA	NA	NA	NA	NA	NA	6.592	141.733	NA	NA	NA	NA	NA	NA	6.592	146.086	NA	NA	NA	NA	NA	NA	NA	NA	NA	NA	NA	NA	NA	NA	NA	NA	NA	NA	NA	NA
					105	NA	NA	NA	NA	NA	NA	NA	NA	NA	NA	NA	NA	NA	NA	6.656	149.112	NA	NA	NA	NA	NA	NA	6.656	152.651	NA	NA	NA	NA	NA	NA	NA	NA	NA	NA	NA	NA	NA	NA	NA	NA	NA	NA	NA	NA
					106	NA	NA	NA	NA	NA	NA	NA	NA	NA	NA	NA	NA	NA	NA	6.72	159.571	NA	NA	NA	NA	NA	NA	6.72	154.525	NA	NA	NA	NA	NA	NA	NA	NA	NA	NA	NA	NA	NA	NA	NA	NA	NA	NA	NA	NA
					107	NA	NA	NA	NA	NA	NA	NA	NA	NA	NA	NA	NA	NA	NA	6.784	153.745	NA	NA	NA	NA	NA	NA	6.784	156.816	NA	NA	NA	NA	NA	NA	NA	NA	NA	NA	NA	NA	NA	NA	NA	NA	NA	NA	NA	NA
					108	NA	NA	NA	NA	NA	NA	NA	NA	NA	NA	NA	NA	NA	NA	6.848	150.111	NA	NA	NA	NA	NA	NA	6.848	163.571	NA	NA	NA	NA	NA	NA	NA	NA	NA	NA	NA	NA	NA	NA	NA	NA	NA	NA	NA	NA
					109	NA	NA	NA	NA	NA	NA	NA	NA	NA	NA	NA	NA	NA	NA	6.912	165.378	NA	NA	NA	NA	NA	NA	6.912	163.067	NA	NA	NA	NA	NA	NA	NA	NA	NA	NA	NA	NA	NA	NA	NA	NA	NA	NA	NA	NA
					110	NA	NA	NA	NA	NA	NA	NA	NA	NA	NA	NA	NA	NA	NA	6.976	150.884	NA	NA	NA	NA	NA	NA	6.976	155.894	NA	NA	NA	NA	NA	NA	NA	NA	NA	NA	NA	NA	NA	NA	NA	NA	NA	NA	NA	NA
					111	NA	NA	NA	NA	NA	NA	NA	NA	NA	NA	NA	NA	NA	NA	NA	NA	NA	NA	NA	NA	NA	NA	7.04	145.161	NA	NA	NA	NA	NA	NA	NA	NA	NA	NA	NA	NA	NA	NA	NA	NA	NA	NA	NA	NA
					112	NA	NA	NA	NA	NA	NA	NA	NA	NA	NA	NA	NA	NA	NA	NA	NA	NA	NA	NA	NA	NA	NA	7.104	133.115	NA	NA	NA	NA	NA	NA	NA	NA	NA	NA	NA	NA	NA	NA	NA	NA	NA	NA	NA	NA
					113	NA	NA	NA	NA	NA	NA	NA	NA	NA	NA	NA	NA	NA	NA	NA	NA	NA	NA	NA	NA	NA	NA	NA	NA	NA	NA	NA	NA	NA	NA	NA	NA	NA	NA	NA	NA	NA	NA	NA	NA	NA	NA	NA	NA
					114	NA	NA	NA	NA	NA	NA	NA	NA	NA	NA	NA	NA	NA	NA	NA	NA	NA	NA	NA	NA	NA	NA	NA	NA	NA	NA	NA	NA	NA	NA	NA	NA	NA	NA	NA	NA	NA	NA	NA	NA	NA	NA	NA	NA
					115	NA	NA	NA	NA	NA	NA	NA	NA	NA	NA	NA	NA	NA	NA	NA	NA	NA	NA	NA	NA	NA	NA	NA	NA	NA	NA	NA	NA	NA	NA	NA	NA	NA	NA	NA	NA	NA	NA	NA	NA	NA	NA	NA	NA
					116	NA	NA	NA	NA	NA	NA	NA	NA	NA	NA	NA	NA	NA	NA	NA	NA	NA	NA	NA	NA	NA	NA	NA	NA	NA	NA	NA	NA	NA	NA	NA	NA	NA	NA	NA	NA	NA	NA	NA	NA	NA	NA	NA	NA
					117	NA	NA	NA	NA	NA	NA	NA	NA	NA	NA	NA	NA	NA	NA	NA	NA	NA	NA	NA	NA	NA	NA	NA	NA	NA	NA	NA	NA	NA	NA	NA	NA	NA	NA	NA	NA	NA	NA	NA	NA	NA	NA	NA	NA
					118	NA	NA	NA	NA	NA	NA	NA	NA	NA	NA	NA	NA	NA	NA	NA	NA	NA	NA	NA	NA	NA	NA	NA	NA	NA	NA	NA	NA	NA	NA	NA	NA	NA	NA	NA	NA	NA	NA	NA	NA	NA	NA	NA	NA
					119	NA	NA	NA	NA	NA	NA	NA	NA	NA	NA	NA	NA	NA	NA	NA	NA	NA	NA	NA	NA	NA	NA	NA	NA	NA	NA	NA	NA	NA	NA	NA	NA	NA	NA	NA	NA	NA	NA	NA	NA	NA	NA	NA	NA
					120	NA	NA	NA	NA	NA	NA	NA	NA	NA	NA	NA	NA	NA	NA	NA	NA	NA	NA	NA	NA	NA	NA	NA	NA	NA	NA	NA	NA	NA	NA	NA	NA	NA	NA	NA	NA	NA	NA	NA	NA	NA	NA	NA	NA
					121	NA	NA	NA	NA	NA	NA	NA	NA	NA	NA	NA	NA	NA	NA	NA	NA	NA	NA	NA	NA	NA	NA	NA	NA	NA	NA	NA	NA	NA	NA	NA	NA	NA	NA	NA	NA	NA	NA	NA	NA	NA	NA	NA	NA
					122	NA	NA	NA	NA	NA	NA	NA	NA	NA	NA	NA	NA	NA	NA	NA	NA	NA	NA	NA	NA	NA	NA	NA	NA	NA	NA	NA	NA	NA	NA	NA	NA	NA	NA	NA	NA	NA	NA	NA	NA	NA	NA	NA	NA
					123	NA	NA	NA	NA	NA	NA	NA	NA	NA	NA	NA	NA	NA	NA	NA	NA	NA	NA	NA	NA	NA	NA	NA	NA	NA	NA	NA	NA	NA	NA	NA	NA	NA	NA	NA	NA	NA	NA	NA	NA	NA	NA	NA	NA
					124	NA	NA	NA	NA	NA	NA	NA	NA	NA	NA	NA	NA	NA	NA	NA	NA	NA	NA	NA	NA	NA	NA	NA	NA	NA	NA	NA	NA	NA	NA	NA	NA	NA	NA	NA	NA	NA	NA	NA	NA	NA	NA	NA	NA
					125	NA	NA	NA	NA	NA	NA	NA	NA	NA	NA	NA	NA	NA	NA	NA	NA	NA	NA	NA	NA	NA	NA	NA	NA	NA	NA	NA	NA	NA	NA	NA	NA	NA	NA	NA	NA	NA	NA	NA	NA	NA	NA	NA	NA
					126	NA	NA	NA	NA	NA	NA	NA	NA	NA	NA	NA	NA	NA	NA	NA	NA	NA	NA	NA	NA	NA	NA	NA	NA	NA	NA	NA	NA	NA	NA	NA	NA	NA	NA	NA	NA	NA	NA	NA	NA	NA	NA	NA	NA
					127	NA	NA	NA	NA	NA	NA	NA	NA	NA	NA	NA	NA	NA	NA	NA	NA	NA	NA	NA	NA	NA	NA	NA	NA	NA	NA	NA	NA	NA	NA	NA	NA	NA	NA	NA	NA	NA	NA	NA	NA	NA	NA	NA	NA
					128	NA	NA	NA	NA	NA	NA	NA	NA	NA	NA	NA	NA	NA	NA	NA	NA	NA	NA	NA	NA	NA	NA	NA	NA	NA	NA	NA	NA	NA	NA	NA	NA	NA	NA	NA	NA	NA	NA	NA	NA	NA	NA	NA	NA
					129	NA	NA	NA	NA	NA	NA	NA	NA	NA	NA	NA	NA	NA	NA	NA	NA	NA	NA	NA	NA	NA	NA	NA	NA	NA	NA	NA	NA	NA	NA	NA	NA	NA	NA	NA	NA	NA	NA	NA	NA	NA	NA	NA	NA
					130	NA	NA	NA	NA	NA	NA	NA	NA	NA	NA	NA	NA	NA	NA	NA	NA	NA	NA	NA	NA	NA	NA	NA	NA	NA	NA	NA	NA	NA	NA	NA	NA	NA	NA	NA	NA	NA	NA	NA	NA	NA	NA	NA	NA
					131	NA	NA	NA	NA	NA	NA	NA	NA	NA	NA	NA	NA	NA	NA	NA	NA	NA	NA	NA	NA	NA	NA	NA	NA	NA	NA	NA	NA	NA	NA	NA	NA	NA	NA	NA	NA	NA	NA	NA	NA	NA	NA	NA	NA
					132	NA	NA	NA	NA	NA	NA	NA	NA	NA	NA	NA	NA	NA	NA	NA	NA	NA	NA	NA	NA	NA	NA	NA	NA	NA	NA	NA	NA	NA	NA	NA	NA	NA	NA	NA	NA	NA	NA	NA	NA	NA	NA	NA	NA
					133	NA	NA	NA	NA	NA	NA	NA	NA	NA	NA	NA	NA	NA	NA	NA	NA	NA	NA	NA	NA	NA	NA	NA	NA	NA	NA	NA	NA	NA	NA	NA	NA	NA	NA	NA	NA	NA	NA	NA	NA	NA	NA	NA	NA
					134	NA	NA	NA	NA	NA	NA	NA	NA	NA	NA	NA	NA	NA	NA	NA	NA	NA	NA	NA	NA	NA	NA	NA	NA	NA	NA	NA	NA	NA	NA	NA	NA	NA	NA	NA	NA	NA	NA	NA	NA	NA	NA	NA	NA
					135	NA	NA	NA	NA	NA	NA	NA	NA	NA	NA	NA	NA	NA	NA	NA	NA	NA	NA	NA	NA	NA	NA	NA	NA	NA	NA	NA	NA	NA	NA	NA	NA	NA	NA	NA	NA	NA	NA	NA	NA	NA	NA	NA	NA
					136	NA	NA	NA	NA	NA	NA	NA	NA	NA	NA	NA	NA	NA	NA	NA	NA	NA	NA	NA	NA	NA	NA	NA	NA	NA	NA	NA	NA	NA	NA	NA	NA	NA	NA	NA	NA	NA	NA	NA	NA	NA	NA	NA	NA
					137	NA	NA	NA	NA	NA	NA	NA	NA	NA	NA	NA	NA	NA	NA	NA	NA	NA	NA	NA	NA	NA	NA	NA	NA	NA	NA	NA	NA	NA	NA	NA	NA	NA	NA	NA	NA	NA	NA	NA	NA	NA	NA	NA	NA
					138	NA	NA	NA	NA	NA	NA	NA	NA	NA	NA	NA	NA	NA	NA	NA	NA	NA	NA	NA	NA	NA	NA	NA	NA	NA	NA	NA	NA	NA	NA	NA	NA	NA	NA	NA	NA	NA	NA	NA	NA	NA	NA	NA	NA
					139	NA	NA	NA	NA	NA	NA	NA	NA	NA	NA	NA	NA	NA	NA	NA	NA	NA	NA	NA	NA	NA	NA	NA	NA	NA	NA	NA	NA	NA	NA	NA	NA	NA	NA	NA	NA	NA	NA	NA	NA	NA	NA	NA	NA
					140	NA	NA	NA	NA	NA	NA	NA	NA	NA	NA	NA	NA	NA	NA	NA	NA	NA	NA	NA	NA	NA	NA	NA	NA	NA	NA	NA	NA	NA	NA	NA	NA	NA	NA	NA	NA	NA	NA	NA	NA	NA	NA	NA	NA
					141	NA	NA	NA	NA	NA	NA	NA	NA	NA	NA	NA	NA	NA	NA	NA	NA	NA	NA	NA	NA	NA	NA	NA	NA	NA	NA	NA	NA	NA	NA	NA	NA	NA	NA	NA	NA	NA	NA	NA	NA	NA	NA	NA	NA
					142	NA	NA	NA	NA	NA	NA	NA	NA	NA	NA	NA	NA	NA	NA	NA	NA	NA	NA	NA	NA	NA	NA	NA	NA	NA	NA	NA	NA	NA	NA	NA	NA	NA	NA	NA	NA	NA	NA	NA	NA	NA	NA	NA	NA
					143	NA	NA	NA	NA	NA	NA	NA	NA	NA	NA	NA	NA	NA	NA	NA	NA	NA	NA	NA	NA	NA	NA	NA	NA	NA	NA	NA	NA	NA	NA	NA	NA	NA	NA	NA	NA	NA	NA	NA	NA	NA	NA	NA	NA
					144	NA	NA	NA	NA	NA	NA	NA	NA	NA	NA	NA	NA	NA	NA	NA	NA	NA	NA	NA	NA	NA	NA	NA	NA	NA	NA	NA	NA	NA	NA	NA	NA	NA	NA	NA	NA	NA	NA	NA	NA	NA	NA	NA	NA
					145	NA	NA	NA	NA	NA	NA	NA	NA	NA	NA	NA	NA	NA	NA	NA	NA	NA	NA	NA	NA	NA	NA	NA	NA	NA	NA	NA	NA	NA	NA	NA	NA	NA	NA	NA	NA	NA	NA	NA	NA	NA	NA	NA	NA
					146	NA	NA	NA	NA	NA	NA	NA	NA	NA	NA	NA	NA	NA	NA	NA	NA	NA	NA	NA	NA	NA	NA	NA	NA	NA	NA	NA	NA	NA	NA	NA	NA	NA	NA	NA	NA	NA	NA	NA	NA	NA	NA	NA	NA
					147	NA	NA	NA	NA	NA	NA	NA	NA	NA	NA	NA	NA	NA	NA	NA	NA	NA	NA	NA	NA	NA	NA	NA	NA	NA	NA	NA	NA	NA	NA	NA	NA	NA	NA	NA	NA	NA	NA	NA	NA	NA	NA	NA	NA
					148	NA	NA	NA	NA	NA	NA	NA	NA	NA	NA	NA	NA	NA	NA	NA	NA	NA	NA	NA	NA	NA	NA	NA	NA	NA	NA	NA	NA	NA	NA	NA	NA	NA	NA	NA	NA	NA	NA	NA	NA	NA	NA	NA	NA
[truncated: 156 more columns]

## Sheet: Kap95
Kap95-GFP						1								2								3								4								5								6
						Ic				Ir		Ibg		Ic				Ir		Ibg		Ic				Ir		Ibg		Ic				Ir		Ibg		Ic				Ir		Ibg		Ic
							991.321				704.101		302.341		545.584				440.829		343.075		691.819				514.407		358.733		785.438				520.579		323.767		758.495				528.527		300.212		511.377
							688.98								202.509								333.086								461.672								458.283								271.204
	average	median	SEM	n		Relative accumulation (RA)					401.76			Relative accumulation (RA)					97.754			Relative accumulation (RA)					155.674			Relative accumulation (RA)					196.812			Relative accumulation (RA)					228.315			Relative accumulation (RA)
RA:	2.35622	2.10563	0.252011	22		1.7149								2.07162								2.13963								2.34574								2.00724								1.74804
	p-value
	5.31373e-05
						141031_Kap95_01_05Crop1_merge.tifGFP_x_lc	141031_Kap95_01_05Crop1_merge.tifGFP_y_lc	141031_Kap95_01_05Crop1_merge.tifmCh_x_cap	141031_Kap95_01_05Crop1_merge.tifmCh_y_cap	141031_Kap95_01_05Crop1_merge.tifGFP_x_lr	141031_Kap95_01_05Crop1_merge.tifGFP_y_lr	141031_Kap95_01_05Crop1_merge.tifGFP_x_bg	141031_Kap95_01_05Crop1_merge.tifGFP_y_bg	141031_Kap95_01_06Crop1_merge.tifGFP_x_lc	141031_Kap95_01_06Crop1_merge.tifGFP_y_lc	141031_Kap95_01_06Crop1_merge.tifmCh_x_cap	141031_Kap95_01_06Crop1_merge.tifmCh_y_cap	141031_Kap95_01_06Crop1_merge.tifGFP_x_lr	141031_Kap95_01_06Crop1_merge.tifGFP_y_lr	141031_Kap95_01_06Crop1_merge.tifGFP_x_bg	141031_Kap95_01_06Crop1_merge.tifGFP_y_bg	141031_Kap95_01_07Crop1_merge.tifGFP_x_lc	141031_Kap95_01_07Crop1_merge.tifGFP_y_lc	141031_Kap95_01_07Crop1_merge.tifmCh_x_cap	141031_Kap95_01_07Crop1_merge.tifmCh_y_cap	141031_Kap95_01_07Crop1_merge.tifGFP_x_lr	141031_Kap95_01_07Crop1_merge.tifGFP_y_lr	141031_Kap95_01_07Crop1_merge.tifGFP_x_bg	141031_Kap95_01_07Crop1_merge.tifGFP_y_bg	141031_Kap95_01_08Crop1_merge.tifGFP_x_lc	141031_Kap95_01_08Crop1_merge.tifGFP_y_lc	141031_Kap95_01_08Crop1_merge.tifmCh_x_cap	141031_Kap95_01_08Crop1_merge.tifmCh_y_cap	141031_Kap95_01_08Crop1_merge.tifGFP_x_lr	141031_Kap95_01_08Crop1_merge.tifGFP_y_lr	141031_Kap95_01_08Crop1_merge.tifGFP_x_bg	141031_Kap95_01_08Crop1_merge.tifGFP_y_bg	141031_Kap95_01_08Crop3_merge.tifGFP_x_lc	141031_Kap95_01_08Crop3_merge.tifGFP_y_lc	141031_Kap95_01_08Crop3_merge.tifmCh_x_cap	141031_Kap95_01_08Crop3_merge.tifmCh_y_cap	141031_Kap95_01_08Crop3_merge.tifGFP_x_lr	141031_Kap95_01_08Crop3_merge.tifGFP_y_lr	141031_Kap95_01_08Crop3_merge.tifGFP_x_bg	141031_Kap95_01_08Crop3_merge.tifGFP_y_bg	141031_Kap95_01_10Crop1_merge.tifGFP_x_lc	141031_Kap95_01_10Crop1_merge.tifGFP_y_lc	141031_Kap95_01_10Crop1_merge.tifmCh_x_cap	141031_Kap95_01_10Crop1_merge.tifmCh_y_cap
					1	0	1070	0	389	0	1018	0	255	0	628	0	101	0	352	0	350	0	683	0	80	0	647	0	323	0	663	0	428	0	483	0	316	0	291	0	75	0	842	0	264	0	229	0	206
					2	0.064	1544.31	0.064	674.266	0.064	1075.45	0.064	265.98	0.064	728.165	0.064	213	0.064	333.536	0.064	335.727	0.064	720	0.064	133.641	0.064	595.629	0.064	319.657	0.064	778.169	0.064	542.7	0.064	461.115	0.064	297.127	0.064	269.251	0.064	156.087	0.064	736.663	0.064	270	0.064	318.122	0.064	494.88
					3	0.128	1856.69	0.128	1065.56	0.128	1136.22	0.128	272.61	0.128	831.701	0.128	408	0.128	338.81	0.128	334.205	0.128	792	0.128	226.708	0.128	550.748	0.128	315.971	0.128	837.529	0.128	612.852	0.128	489.771	0.128	285.918	0.128	287.406	0.128	278.068	0.128	589.683	0.128	274	0.128	431.779	0.128	863.543
					4	0.192	1814.37	0.192	1427.54	0.192	1043.16	0.192	248.774	0.192	789.791	0.192	693	0.192	360.548	0.192	322.074	0.192	844	0.192	364.821	0.192	490.432	0.192	313.173	0.192	849.35	0.192	703.569	0.192	531.207	0.192	300.95	0.192	303.664	0.192	419.057	0.192	486.257	0.192	296	0.192	515.049	0.192	1238.87
					5	0.256	1595.29	0.256	1723.65	0.256	863.18	0.256	230.134	0.256	627.976	0.256	968	0.256	382.168	0.256	322.819	0.256	832	0.256	549.961	0.256	476.279	0.256	340.105	0.256	883.088	0.256	747.966	0.256	520.312	0.256	283.068	0.256	368.951	0.256	625.684	0.256	451.316	0.256	322	0.256	551.612	0.256	1535.06
					6	0.32	1526.29	0.32	1860.56	0.32	655.4	0.32	254.813	0.32	463.735	0.32	1098	0.32	390.188	0.32	319.077	0.32	794	0.32	776.557	0.32	454.586	0.32	331.685	0.32	958.332	0.32	732.287	0.32	494.387	0.32	306.946	0.32	449.78	0.32	866.745	0.32	396.434	0.32	294	0.32	514.851	0.32	1632.03
					7	0.384	1588.38	0.384	1900.16	0.384	496.35	0.384	313.933	0.384	398.848	0.384	1182	0.384	347.314	0.384	311.929	0.384	800	0.384	1013.78	0.384	443.64	0.384	312.849	0.384	1038.71	0.384	771.394	0.384	513.373	0.384	314.964	0.384	500.237	0.384	1099.84	0.384	415.519	0.384	299	0.384	503.869	0.384	1695.69
					8	0.448	1694	0.448	1736.34	0.448	426.33	0.448	280.52	0.448	415.808	0.448	1222	0.448	290.698	0.448	314.465	0.448	719.629	0.448	1167.39	0.448	439.255	0.448	308.297	0.448	1082.55	0.448	847.867	0.448	556.796	0.448	291.432	0.448	529.669	0.448	1236.88	0.448	505.775	0.448	294	0.448	563.625	0.448	1887.19
					9	0.512	1573.35	0.512	1545.64	0.512	393.69	0.512	243.559	0.512	464.007	0.512	1217	0.512	273.871	0.512	309.046	0.512	656.349	0.512	1237.3	0.512	418.275	0.512	303.159	0.512	1016.14	0.512	924.106	0.512	571.792	0.512	280.596	0.512	538.845	0.512	1335.75	0.512	609.58	0.512	289	0.512	588.86	0.512	2128.21
					10	0.576	1353.77	0.576	1386.03	0.576	384.71	0.576	269.779	0.576	509.847	0.576	1179	0.576	272.925	0.576	294.264	0.576	668.984	0.576	1207.96	0.576	399.497	0.576	301.455	0.576	886.171	0.576	981.5	0.576	538.221	0.576	311.54	0.576	549.16	0.576	1426.67	0.576	667.018	0.576	293	0.576	531.73	0.576	2361.28
					11	0.64	1246.05	0.64	1141.43	0.64	461.14	0.64	290.872	0.64	554.792	0.64	1125	0.64	274.723	0.64	289.131	0.64	711.78	0.64	1233.35	0.64	394.919	0.64	315.265	0.64	762.081	0.64	966.3	0.64	489.956	0.64	312.519	0.64	577.498	0.64	1466.86	0.64	594.17	0.64	311	0.64	593.099	0.64	2389.93
					12	0.704	955.459	0.704	896.119	0.704	631.47	0.704	282.368	0.704	587.183	0.704	1174	0.704	271.396	0.704	283.158	0.704	784.164	0.704	1290.13	0.704	391.059	0.704	324.24	0.704	620.507	0.704	923	0.704	480.72	0.704	283.92	0.704	704.398	0.704	1361.68	0.704	538.287	0.704	323	0.704	635.938	0.704	1958.35
					13	0.768	731.422	0.768	724.408	0.768	779.59	0.768	285.884	0.768	639.979	0.768	1271	0.768	289.539	0.768	300.35	0.768	861.247	0.768	1441.35	0.768	403.269	0.768	327.4	0.768	527.35	0.768	864.55	0.768	462.667	0.768	262.899	0.768	892.857	0.768	1188.96	0.768	512.002	0.768	312	0.768	619.351	0.768	1376.32
					14	0.832	587.795	0.832	593.561	0.832	826.41	0.832	322.682	0.832	721.085	0.832	1319	0.832	319.675	0.832	334.13	0.832	919.029	0.832	1596.4	0.832	422.752	0.832	336.92	0.832	451.056	0.832	783.55	0.832	432.475	0.832	257.346	0.832	1019.38	0.832	1032.66	0.832	542.572	0.832	327	0.832	595.733	0.832	868.459
					15	0.896	553.417	0.896	593.066	0.896	749.373	0.896	349.311	0.896	777.045	0.896	1271	0.896	337.467	0.896	323.21	0.896	877.448	0.896	1629.71	0.896	446.016	0.896	336.52	0.896	390.023	0.896	713.35	0.896	437.988	0.896	268.003	0.896	1072.31	0.896	947.006	0.896	582.768	0.896	305	0.896	618.941	0.896	506.252
					16	0.96	642.382	0.96	558.154	0.96	629.322	0.96	354.797	0.96	770.715	0.96	1223	0.96	320.493	0.96	311.66	0.96	757.931	0.96	1552.55	0.96	490.986	0.96	314.08	0.96	402.436	0.96	653.65	0.96	417.222	0.96	286.716	0.96	1064.84	0.96	899.039	0.96	599.654	0.96	258.431	0.96	624.003	0.96	275.207
					17	1.024	703.521	1.024	470.43	1.024	501.887	1.024	324.919	1.024	747.764	1.024	1310	1.024	339.579	1.024	329.25	1.024	603.669	1.024	1415.17	1.024	544.056	1.024	320.48	1.024	474.53	1.024	595.15	1.024	372.795	1.024	308.607	1.024	1013.94	1.024	866.357	1.024	610.322	1.024	234.511	1.024	628.113	NA	NA
					18	1.088	704.055	1.088	338.733	1.088	503.122	1.088	335.759	1.088	684.292	1.088	1344	1.088	356.965	1.088	331.07	1.088	514.467	1.088	1187.98	1.088	575.537	1.088	370.8	1.088	538.647	1.088	527.3	1.088	351.546	1.088	301.045	1.088	1088.29	1.088	718.09	1.088	672.864	1.088	241.154	1.088	652.801	NA	NA
					19	1.152	657.324	1.152	216.071	1.152	478.083	1.152	328.978	1.152	630.454	1.152	1296	1.152	391.602	1.152	319.9	1.152	457.477	1.152	944.109	1.152	637.447	1.152	400.2	1.152	564.791	1.152	414.3	1.152	353.074	1.152	284.834	1.152	1189.37	1.152	495.07	1.152	655.612	1.152	261.559	1.152	681.232	NA	NA
					20	1.216	634.074	1.216	134.733	1.216	390.624	1.216	328.263	1.216	544.323	1.216	1260	1.216	440.588	1.216	334.3	1.216	440.94	NA	NA	1.216	662.026	1.216	379.96	1.216	620.533	1.216	274.15	1.216	344.513	1.216	282.641	1.216	1430.09	1.216	306.611	1.216	633.609	1.216	254.476	1.216	678.163	NA	NA
					21	1.28	656.866	1.28	90.353	1.28	370.464	1.28	319.224	1.28	460.97	1.28	1267	1.28	472.178	1.28	361.86	1.28	449.05	NA	NA	1.28	640.684	1.28	365.68	1.28	715.637	NA	NA	1.28	340.593	1.28	296.816	1.28	1587.48	1.28	171.943	1.28	568.519	1.28	248.17	1.28	646.864	NA	NA
					22	1.344	656.698	NA	NA	1.344	499.291	1.344	305.351	1.344	416.631	1.344	1245	1.344	523.788	1.344	383.59	1.344	487.55	NA	NA	1.344	595.765	1.344	377.938	1.344	928.376	NA	NA	1.344	347.489	1.344	306.012	1.344	1493.47	1.344	88.864	1.344	488.335	1.344	281.877	1.344	652.861	NA	NA
					23	1.408	619.367	NA	NA	1.408	629.803	1.408	272.669	1.408	398.035	1.408	1118	1.408	546.226	1.408	398.93	1.408	552.08	NA	NA	1.408	534.777	1.408	401.007	1.408	1146.97	NA	NA	1.408	383.215	1.408	304.97	1.408	1225.63	1.408	62.745	1.408	453.84	1.408	336.158	1.408	717.717	NA	NA
					24	1.472	549.358	NA	NA	1.472	716.488	1.472	277.282	1.472	383.121	1.472	1017.85	1.472	566.692	1.472	393.02	1.472	625.01	NA	NA	1.472	519.076	1.472	401.652	1.472	1197.9	NA	NA	1.472	450.604	1.472	301.512	1.472	1012.72	1.472	65.046	1.472	469.77	1.472	363.158	1.472	727.018	NA	NA
					25	1.536	446.395	NA	NA	1.536	871	1.536	312.653	1.536	365.201	1.536	926.774	1.536	620.24	1.536	384.17	1.536	700.02	NA	NA	1.536	569.367	1.536	386.087	1.536	1120.62	NA	NA	1.536	453.879	1.536	285.386	1.536	897.13	NA	NA	1.536	512.491	1.536	361.247	1.536	656.682	NA	NA
					26	1.6	397.537	NA	NA	1.6	982.664	1.6	306.477	1.6	369	1.6	731.254	1.6	660.01	1.6	383.61	1.6	735.47	NA	NA	1.6	637.968	1.6	379.27	1.6	966.886	NA	NA	1.6	482.268	1.6	269.618	1.6	769.129	NA	NA	1.6	531.256	1.6	345.535	1.6	561.605	NA	NA
					27	1.664	407.49	NA	NA	1.664	931.573	1.664	278.163	1.664	372.66	1.664	462.548	1.664	650	1.664	382.78	NA	NA	NA	NA	1.664	700.994	1.664	361.293	NA	NA	NA	NA	1.664	543.933	1.664	273.199	1.664	627.494	NA	NA	1.664	466.65	1.664	290.819	1.664	409.869	NA	NA
					28	NA	NA	NA	NA	1.728	717.791	1.728	272.251	1.728	377.658	NA	NA	1.728	652.99	1.728	378.253	NA	NA	NA	NA	1.728	742.379	1.728	353.434	NA	NA	NA	NA	1.728	560.364	1.728	292.156	1.728	529.687	NA	NA	1.728	391.785	1.728	309.289	1.728	285.768	NA	NA
					29	NA	NA	NA	NA	1.792	598.813	1.792	309.793	1.792	410.179	NA	NA	1.792	664.15	1.792	373.921	NA	NA	NA	NA	1.792	732.043	1.792	348.896	NA	NA	NA	NA	1.792	542.488	1.792	310.269	1.792	455.055	NA	NA	1.792	349.113	1.792	315.306	1.792	242.368	NA	NA
					30	NA	NA	NA	NA	1.856	590.969	1.856	318.736	1.856	472.345	NA	NA	1.856	673.29	1.856	374.581	NA	NA	NA	NA	1.856	696.643	1.856	338.617	NA	NA	NA	NA	1.856	496.813	1.856	317.661	1.856	426.477	NA	NA	1.856	329.738	1.856	326.452	1.856	221.162	NA	NA
					31	NA	NA	NA	NA	1.92	600.712	1.92	309.38	1.92	485.773	NA	NA	1.92	685.02	1.92	371.544	NA	NA	NA	NA	1.92	683.056	1.92	360.64	NA	NA	NA	NA	1.92	461.851	1.92	306.97	1.92	459.699	NA	NA	1.92	341.492	1.92	331.704	1.92	220.292	NA	NA
					32	NA	NA	NA	NA	1.984	639.364	1.984	296.711	1.984	543.069	NA	NA	1.984	662.47	1.984	358.528	NA	NA	NA	NA	1.984	632.076	1.984	402.097	NA	NA	NA	NA	1.984	437.91	1.984	302.963	1.984	584.213	NA	NA	1.984	384.801	1.984	315.979	1.984	219.927	NA	NA
					33	NA	NA	NA	NA	2.048	731.056	2.048	294.242	2.048	608.414	NA	NA	2.048	644.57	2.048	345.681	NA	NA	NA	NA	2.048	511.417	2.048	430.474	NA	NA	NA	NA	2.048	404.532	2.048	304.814	2.048	744.639	NA	NA	2.048	452.175	2.048	291.622	2.048	237.425	NA	NA
					34	NA	NA	NA	NA	2.112	717.565	2.112	290.056	2.112	605.336	NA	NA	2.112	594.14	2.112	357.177	NA	NA	NA	NA	2.112	430.427	2.112	424.685	NA	NA	NA	NA	2.112	407.474	2.112	318.079	2.112	835.073	NA	NA	2.112	511.611	2.112	277.595	NA	NA	NA	NA
					35	NA	NA	NA	NA	2.176	692.627	2.176	293.577	2.176	562.125	NA	NA	2.176	526.4	2.176	371.868	NA	NA	NA	NA	2.176	395.512	2.176	400.946	NA	NA	NA	NA	2.176	405.439	2.176	329.619	NA	NA	NA	NA	2.176	527.545	2.176	289.342	NA	NA	NA	NA
					36	NA	NA	NA	NA	2.24	749.07	2.24	290.91	2.24	455.59	NA	NA	2.24	500.19	2.24	368.475	NA	NA	NA	NA	2.24	393.062	2.24	386.874	NA	NA	NA	NA	2.24	404.026	2.24	354.689	NA	NA	NA	NA	2.24	542.69	2.24	294.833	NA	NA	NA	NA
					37	NA	NA	NA	NA	2.304	804.323	2.304	307.618	2.304	384.99	NA	NA	2.304	456.46	2.304	365.107	NA	NA	NA	NA	2.304	423.088	2.304	363.831	NA	NA	NA	NA	2.304	348.666	2.304	368.926	NA	NA	NA	NA	2.304	589.032	2.304	287.752	NA	NA	NA	NA
					38	NA	NA	NA	NA	2.368	800.908	2.368	338.697	NA	NA	NA	NA	2.368	434.33	2.368	356.694	NA	NA	NA	NA	2.368	453.826	2.368	359.818	NA	NA	NA	NA	2.368	329.823	2.368	342.61	NA	NA	NA	NA	2.368	606.428	2.368	285.391	NA	NA	NA	NA
					39	NA	NA	NA	NA	2.432	758.893	2.432	309.065	NA	NA	NA	NA	2.432	445.624	2.432	334.175	NA	NA	NA	NA	2.432	488.98	2.432	362.142	NA	NA	NA	NA	2.432	349.659	2.432	331.515	NA	NA	NA	NA	2.432	562.766	2.432	274.76	NA	NA	NA	NA
					40	NA	NA	NA	NA	2.496	779.647	2.496	281.534	NA	NA	NA	NA	2.496	463.211	2.496	321.072	NA	NA	NA	NA	2.496	524.089	2.496	362.4	NA	NA	NA	NA	2.496	382.158	2.496	329.691	NA	NA	NA	NA	2.496	501.713	2.496	291.644	NA	NA	NA	NA
					41	NA	NA	NA	NA	2.56	845.779	2.56	281.862	NA	NA	NA	NA	2.56	492.311	2.56	331.26	NA	NA	NA	NA	2.56	531.428	2.56	380.8	NA	NA	NA	NA	2.56	475.402	2.56	321.063	NA	NA	NA	NA	2.56	445.739	2.56	311.84	NA	NA	NA	NA
					42	NA	NA	NA	NA	2.624	894.568	2.624	318.522	NA	NA	NA	NA	2.624	484.578	NA	NA	NA	NA	NA	NA	2.624	491.424	2.624	397.961	NA	NA	NA	NA	2.624	665.976	2.624	324.931	NA	NA	NA	NA	NA	NA	2.624	289.051	NA	NA	NA	NA
					43	NA	NA	NA	NA	2.688	927.698	2.688	343.449	NA	NA	NA	NA	2.688	460.088	NA	NA	NA	NA	NA	NA	2.688	458.199	2.688	412.089	NA	NA	NA	NA	2.688	976.167	2.688	331.666	NA	NA	NA	NA	NA	NA	2.688	268.077	NA	NA	NA	NA
					44	NA	NA	NA	NA	2.752	818.381	2.752	326.978	NA	NA	NA	NA	2.752	439.631	NA	NA	NA	NA	NA	NA	2.752	410.142	2.752	430.403	NA	NA	NA	NA	2.752	1023.74	2.752	338.415	NA	NA	NA	NA	NA	NA	2.752	274.708	NA	NA	NA	NA
					45	NA	NA	NA	NA	2.816	696.981	2.816	313.723	NA	NA	NA	NA	2.816	408.517	NA	NA	NA	NA	NA	NA	2.816	377.539	NA	NA	NA	NA	NA	NA	2.816	942.28	2.816	340.916	NA	NA	NA	NA	NA	NA	2.816	304.957	NA	NA	NA	NA
					46	NA	NA	NA	NA	2.88	584.534	2.88	300.857	NA	NA	NA	NA	2.88	389.067	NA	NA	NA	NA	NA	NA	2.88	371	NA	NA	NA	NA	NA	NA	2.88	787.54	2.88	330.074	NA	NA	NA	NA	NA	NA	2.88	320.354	NA	NA	NA	NA
					47	NA	NA	NA	NA	2.944	480.228	2.944	322.245	NA	NA	NA	NA	2.944	405.186	NA	NA	NA	NA	NA	NA	2.944	393.62	NA	NA	NA	NA	NA	NA	2.944	756.38	2.944	337.038	NA	NA	NA	NA	NA	NA	2.944	326.34	NA	NA	NA	NA
					48	NA	NA	NA	NA	3.008	386.678	3.008	325.496	NA	NA	NA	NA	3.008	431.79	NA	NA	NA	NA	NA	NA	3.008	440.5	NA	NA	NA	NA	NA	NA	3.008	841.48	3.008	346.725	NA	NA	NA	NA	NA	NA	3.008	325.98	NA	NA	NA	NA
					49	NA	NA	NA	NA	3.072	357.828	3.072	316.71	NA	NA	NA	NA	3.072	436.895	NA	NA	NA	NA	NA	NA	3.072	467.88	NA	NA	NA	NA	NA	NA	3.072	892.12	3.072	360.941	NA	NA	NA	NA	NA	NA	3.072	324	NA	NA	NA	NA
					50	NA	NA	NA	NA	3.136	465.822	3.136	343.733	NA	NA	NA	NA	3.136	417.322	NA	NA	NA	NA	NA	NA	3.136	426.63	NA	NA	NA	NA	NA	NA	3.136	860.22	3.136	364.555	NA	NA	NA	NA	NA	NA	3.136	331.14	NA	NA	NA	NA
					51	NA	NA	NA	NA	3.2	630.076	3.2	354.134	NA	NA	NA	NA	3.2	386.816	NA	NA	NA	NA	NA	NA	3.2	394.77	NA	NA	NA	NA	NA	NA	3.2	770.58	3.2	369.4	NA	NA	NA	NA	NA	NA	3.2	349.42	NA	NA	NA	NA
					52	NA	NA	NA	NA	3.264	802.077	3.264	350.705	NA	NA	NA	NA	3.264	366.177	NA	NA	NA	NA	NA	NA	3.264	427.54	NA	NA	NA	NA	NA	NA	3.264	596.057	3.264	381.721	NA	NA	NA	NA	NA	NA	3.264	343.38	NA	NA	NA	NA
					53	NA	NA	NA	NA	3.328	939.174	NA	NA	NA	NA	NA	NA	3.328	356.988	NA	NA	NA	NA	NA	NA	3.328	492.809	NA	NA	NA	NA	NA	NA	3.328	511.115	3.328	396.114	NA	NA	NA	NA	NA	NA	NA	NA	NA	NA	NA	NA
					54	NA	NA	NA	NA	3.392	936.841	NA	NA	NA	NA	NA	NA	3.392	368.735	NA	NA	NA	NA	NA	NA	3.392	597.307	NA	NA	NA	NA	NA	NA	3.392	485.547	3.392	414.504	NA	NA	NA	NA	NA	NA	NA	NA	NA	NA	NA	NA
					55	NA	NA	NA	NA	3.456	811.645	NA	NA	NA	NA	NA	NA	3.456	379.006	NA	NA	NA	NA	NA	NA	3.456	678.571	NA	NA	NA	NA	NA	NA	3.456	493.752	3.456	423.428	NA	NA	NA	NA	NA	NA	NA	NA	NA	NA	NA	NA
					56	NA	NA	NA	NA	3.52	696.266	NA	NA	NA	NA	NA	NA	3.52	382.54	NA	NA	NA	NA	NA	NA	3.52	640.582	NA	NA	NA	NA	NA	NA	3.52	511.601	3.52	401.348	NA	NA	NA	NA	NA	NA	NA	NA	NA	NA	NA	NA
					57	NA	NA	NA	NA	3.584	725.174	NA	NA	NA	NA	NA	NA	3.584	390.31	NA	NA	NA	NA	NA	NA	3.584	551.579	NA	NA	NA	NA	NA	NA	3.584	548.687	3.584	372.04	NA	NA	NA	NA	NA	NA	NA	NA	NA	NA	NA	NA
					58	NA	NA	NA	NA	3.648	735.801	NA	NA	NA	NA	NA	NA	3.648	419.96	NA	NA	NA	NA	NA	NA	3.648	495.47	NA	NA	NA	NA	NA	NA	3.648	561.012	3.648	375.019	NA	NA	NA	NA	NA	NA	NA	NA	NA	NA	NA	NA
					59	NA	NA	NA	NA	3.712	797.042	NA	NA	NA	NA	NA	NA	3.712	466.91	NA	NA	NA	NA	NA	NA	NA	NA	NA	NA	NA	NA	NA	NA	3.712	519.923	3.712	399.356	NA	NA	NA	NA	NA	NA	NA	NA	NA	NA	NA	NA
					60	NA	NA	NA	NA	3.776	896.242	NA	NA	NA	NA	NA	NA	NA	NA	NA	NA	NA	NA	NA	NA	NA	NA	NA	NA	NA	NA	NA	NA	3.776	477.38	3.776	412.205	NA	NA	NA	NA	NA	NA	NA	NA	NA	NA	NA	NA
					61	NA	NA	NA	NA	3.84	914.074	NA	NA	NA	NA	NA	NA	NA	NA	NA	NA	NA	NA	NA	NA	NA	NA	NA	NA	NA	NA	NA	NA	3.84	471.794	NA	NA	NA	NA	NA	NA	NA	NA	NA	NA	NA	NA	NA	NA
					62	NA	NA	NA	NA	3.904	804.263	NA	NA	NA	NA	NA	NA	NA	NA	NA	NA	NA	NA	NA	NA	NA	NA	NA	NA	NA	NA	NA	NA	3.904	509.923	NA	NA	NA	NA	NA	NA	NA	NA	NA	NA	NA	NA	NA	NA
					63	NA	NA	NA	NA	3.968	700.716	NA	NA	NA	NA	NA	NA	NA	NA	NA	NA	NA	NA	NA	NA	NA	NA	NA	NA	NA	NA	NA	NA	3.968	546.315	NA	NA	NA	NA	NA	NA	NA	NA	NA	NA	NA	NA	NA	NA
					64	NA	NA	NA	NA	4.032	588.04	NA	NA	NA	NA	NA	NA	NA	NA	NA	NA	NA	NA	NA	NA	NA	NA	NA	NA	NA	NA	NA	NA	4.032	559.843	NA	NA	NA	NA	NA	NA	NA	NA	NA	NA	NA	NA	NA	NA
					65	NA	NA	NA	NA	NA	NA	NA	NA	NA	NA	NA	NA	NA	NA	NA	NA	NA	NA	NA	NA	NA	NA	NA	NA	NA	NA	NA	NA	4.096	583.211	NA	NA	NA	NA	NA	NA	NA	NA	NA	NA	NA	NA	NA	NA
					66	NA	NA	NA	NA	NA	NA	NA	NA	NA	NA	NA	NA	NA	NA	NA	NA	NA	NA	NA	NA	NA	NA	NA	NA	NA	NA	NA	NA	4.16	580.635	NA	NA	NA	NA	NA	NA	NA	NA	NA	NA	NA	NA	NA	NA
					67	NA	NA	NA	NA	NA	NA	NA	NA	NA	NA	NA	NA	NA	NA	NA	NA	NA	NA	NA	NA	NA	NA	NA	NA	NA	NA	NA	NA	4.224	522.784	NA	NA	NA	NA	NA	NA	NA	NA	NA	NA	NA	NA	NA	NA
					68	NA	NA	NA	NA	NA	NA	NA	NA	NA	NA	NA	NA	NA	NA	NA	NA	NA	NA	NA	NA	NA	NA	NA	NA	NA	NA	NA	NA	4.288	464.83	NA	NA	NA	NA	NA	NA	NA	NA	NA	NA	NA	NA	NA	NA
					69	NA	NA	NA	NA	NA	NA	NA	NA	NA	NA	NA	NA	NA	NA	NA	NA	NA	NA	NA	NA	NA	NA	NA	NA	NA	NA	NA	NA	4.352	465.63	NA	NA	NA	NA	NA	NA	NA	NA	NA	NA	NA	NA	NA	NA
					70	NA	NA	NA	NA	NA	NA	NA	NA	NA	NA	NA	NA	NA	NA	NA	NA	NA	NA	NA	NA	NA	NA	NA	NA	NA	NA	NA	NA	4.416	509.588	NA	NA	NA	NA	NA	NA	NA	NA	NA	NA	NA	NA	NA	NA
					71	NA	NA	NA	NA	NA	NA	NA	NA	NA	NA	NA	NA	NA	NA	NA	NA	NA	NA	NA	NA	NA	NA	NA	NA	NA	NA	NA	NA	4.48	535.483	NA	NA	NA	NA	NA	NA	NA	NA	NA	NA	NA	NA	NA	NA
					72	NA	NA	NA	NA	NA	NA	NA	NA	NA	NA	NA	NA	NA	NA	NA	NA	NA	NA	NA	NA	NA	NA	NA	NA	NA	NA	NA	NA	4.544	498.318	NA	NA	NA	NA	NA	NA	NA	NA	NA	NA	NA	NA	NA	NA
					73	NA	NA	NA	NA	NA	NA	NA	NA	NA	NA	NA	NA	NA	NA	NA	NA	NA	NA	NA	NA	NA	NA	NA	NA	NA	NA	NA	NA	4.608	439.703	NA	NA	NA	NA	NA	NA	NA	NA	NA	NA	NA	NA	NA	NA
					74	NA	NA	NA	NA	NA	NA	NA	NA	NA	NA	NA	NA	NA	NA	NA	NA	NA	NA	NA	NA	NA	NA	NA	NA	NA	NA	NA	NA	4.672	474.339	NA	NA	NA	NA	NA	NA	NA	NA	NA	NA	NA	NA	NA	NA
					75	NA	NA	NA	NA	NA	NA	NA	NA	NA	NA	NA	NA	NA	NA	NA	NA	NA	NA	NA	NA	NA	NA	NA	NA	NA	NA	NA	NA	4.736	503.395	NA	NA	NA	NA	NA	NA	NA	NA	NA	NA	NA	NA	NA	NA
					76	NA	NA	NA	NA	NA	NA	NA	NA	NA	NA	NA	NA	NA	NA	NA	NA	NA	NA	NA	NA	NA	NA	NA	NA	NA	NA	NA	NA	4.8	495.948	NA	NA	NA	NA	NA	NA	NA	NA	NA	NA	NA	NA	NA	NA
					77	NA	NA	NA	NA	NA	NA	NA	NA	NA	NA	NA	NA	NA	NA	NA	NA	NA	NA	NA	NA	NA	NA	NA	NA	NA	NA	NA	NA	4.864	498.013	NA	NA	NA	NA	NA	NA	NA	NA	NA	NA	NA	NA	NA	NA
					78	NA	NA	NA	NA	NA	NA	NA	NA	NA	NA	NA	NA	NA	NA	NA	NA	NA	NA	NA	NA	NA	NA	NA	NA	NA	NA	NA	NA	4.928	482.848	NA	NA	NA	NA	NA	NA	NA	NA	NA	NA	NA	NA	NA	NA
					79	NA	NA	NA	NA	NA	NA	NA	NA	NA	NA	NA	NA	NA	NA	NA	NA	NA	NA	NA	NA	NA	NA	NA	NA	NA	NA	NA	NA	4.992	463.099	NA	NA	NA	NA	NA	NA	NA	NA	NA	NA	NA	NA	NA	NA
					80	NA	NA	NA	NA	NA	NA	NA	NA	NA	NA	NA	NA	NA	NA	NA	NA	NA	NA	NA	NA	NA	NA	NA	NA	NA	NA	NA	NA	5.056	481.408	NA	NA	NA	NA	NA	NA	NA	NA	NA	NA	NA	NA	NA	NA
					81	NA	NA	NA	NA	NA	NA	NA	NA	NA	NA	NA	NA	NA	NA	NA	NA	NA	NA	NA	NA	NA	NA	NA	NA	NA	NA	NA	NA	5.12	513.02	NA	NA	NA	NA	NA	NA	NA	NA	NA	NA	NA	NA	NA	NA
					82	NA	NA	NA	NA	NA	NA	NA	NA	NA	NA	NA	NA	NA	NA	NA	NA	NA	NA	NA	NA	NA	NA	NA	NA	NA	NA	NA	NA	5.184	554.298	NA	NA	NA	NA	NA	NA	NA	NA	NA	NA	NA	NA	NA	NA
					83	NA	NA	NA	NA	NA	NA	NA	NA	NA	NA	NA	NA	NA	NA	NA	NA	NA	NA	NA	NA	NA	NA	NA	NA	NA	NA	NA	NA	NA	NA	NA	NA	NA	NA	NA	NA	NA	NA	NA	NA	NA	NA	NA	NA
					84	NA	NA	NA	NA	NA	NA	NA	NA	NA	NA	NA	NA	NA	NA	NA	NA	NA	NA	NA	NA	NA	NA	NA	NA	NA	NA	NA	NA	NA	NA	NA	NA	NA	NA	NA	NA	NA	NA	NA	NA	NA	NA	NA	NA
[truncated: 132 more columns]

## Sheet: Kap60
Kap60-GFP						1								2								3								4								5								6
						Ic				Ir		Ibg		Ic				Ir		Ibg		Ic				Ir		Ibg		Ic				Ir		Ibg		Ic				Ir		Ibg		Ic
							365.27				329.011		248.357		662.705				467.532		278.689		862.849				330.802		237.41		372.875				314.565		262.309		484.813				384.831		273.112		462.877
							116.914								384.016								625.439								110.567								211.701								225.922
	average	median	SEM	n		Relative accumulation (RA)					80.6542			Relative accumulation (RA)					188.844			Relative accumulation (RA)					93.3916			Relative accumulation (RA)					52.2563			Relative accumulation (RA)					111.719			Relative accumulation (RA)
RA:	4.00233	2.97614	0.449486	44		1.44957								2.03351								6.69695								2.11585								1.89494								1.84349
	p-value
	4.52166e-11
						180919_VisSt_89.5.2_Kap60GFP01_01_Crop_1GFP_x_lc	180919_VisSt_89.5.2_Kap60GFP01_01_Crop_1GFP_y_lc	180919_VisSt_89.5.2_Kap60GFP01_01_Crop_1mCh_x_cap	180919_VisSt_89.5.2_Kap60GFP01_01_Crop_1mCh_y_cap	180919_VisSt_89.5.2_Kap60GFP01_01_Crop_1GFP_x_lr	180919_VisSt_89.5.2_Kap60GFP01_01_Crop_1GFP_y_lr	180919_VisSt_89.5.2_Kap60GFP01_01_Crop_1GFP_x_bg	180919_VisSt_89.5.2_Kap60GFP01_01_Crop_1GFP_y_bg	180919_VisSt_89.5.2_Kap60GFP01_03_Crop_1GFP_x_lc	180919_VisSt_89.5.2_Kap60GFP01_03_Crop_1GFP_y_lc	180919_VisSt_89.5.2_Kap60GFP01_03_Crop_1mCh_x_cap	180919_VisSt_89.5.2_Kap60GFP01_03_Crop_1mCh_y_cap	180919_VisSt_89.5.2_Kap60GFP01_03_Crop_1GFP_x_lr	180919_VisSt_89.5.2_Kap60GFP01_03_Crop_1GFP_y_lr	180919_VisSt_89.5.2_Kap60GFP01_03_Crop_1GFP_x_bg	180919_VisSt_89.5.2_Kap60GFP01_03_Crop_1GFP_y_bg	180919_VisSt_89.5.2_Kap60GFP01_03_Crop_2GFP_x_lc	180919_VisSt_89.5.2_Kap60GFP01_03_Crop_2GFP_y_lc	180919_VisSt_89.5.2_Kap60GFP01_03_Crop_2mCh_x_cap	180919_VisSt_89.5.2_Kap60GFP01_03_Crop_2mCh_y_cap	180919_VisSt_89.5.2_Kap60GFP01_03_Crop_2GFP_x_lr	180919_VisSt_89.5.2_Kap60GFP01_03_Crop_2GFP_y_lr	180919_VisSt_89.5.2_Kap60GFP01_03_Crop_2GFP_x_bg	180919_VisSt_89.5.2_Kap60GFP01_03_Crop_2GFP_y_bg	180919_VisSt_89.5.2_Kap60GFP01_04_Crop_1GFP_x_lc	180919_VisSt_89.5.2_Kap60GFP01_04_Crop_1GFP_y_lc	180919_VisSt_89.5.2_Kap60GFP01_04_Crop_1mCh_x_cap	180919_VisSt_89.5.2_Kap60GFP01_04_Crop_1mCh_y_cap	180919_VisSt_89.5.2_Kap60GFP01_04_Crop_1GFP_x_lr	180919_VisSt_89.5.2_Kap60GFP01_04_Crop_1GFP_y_lr	180919_VisSt_89.5.2_Kap60GFP01_04_Crop_1GFP_x_bg	180919_VisSt_89.5.2_Kap60GFP01_04_Crop_1GFP_y_bg	180919_VisSt_89.5.2_Kap60GFP01_04_Crop_2GFP_x_lc	180919_VisSt_89.5.2_Kap60GFP01_04_Crop_2GFP_y_lc	180919_VisSt_89.5.2_Kap60GFP01_04_Crop_2mCh_x_cap	180919_VisSt_89.5.2_Kap60GFP01_04_Crop_2mCh_y_cap	180919_VisSt_89.5.2_Kap60GFP01_04_Crop_2GFP_x_lr	180919_VisSt_89.5.2_Kap60GFP01_04_Crop_2GFP_y_lr	180919_VisSt_89.5.2_Kap60GFP01_04_Crop_2GFP_x_bg	180919_VisSt_89.5.2_Kap60GFP01_04_Crop_2GFP_y_bg	180919_VisSt_89.5.2_Kap60GFP01_05_Crop_1GFP_x_lc	180919_VisSt_89.5.2_Kap60GFP01_05_Crop_1GFP_y_lc	180919_VisSt_89.5.2_Kap60GFP01_05_Crop_1mCh_x_cap	180919_VisSt_89.5.2_Kap60GFP01_05_Crop_1mCh_y_cap
					1	0	399	0	0	0	0	0	0	0	422	0	27	0	373	0	255	0	182	0	204	0	388	0	198	0	289	0	10	0	333	0	284	0	389	0	699	0	342	0	298	0	400	0	625
					2	0.064	363	0.064	396.678	0.064	335.455	0.064	270.986	0.064	503.389	0.064	67	0.064	327.42	0.064	249.916	0.064	200.304	0.064	430.122	0.064	444.388	0.064	204.391	0.064	340.99	0.064	26.894	0.064	334.811	0.064	272.034	0.064	386.359	0.064	1071.92	0.064	334.902	0.064	349	0.064	416	0.064	703
					3	0.128	354	0.128	604.629	0.128	317.668	0.128	284.958	0.128	620.175	0.128	182	0.128	309.582	0.128	271.435	0.128	226.331	0.128	866.418	0.128	465.454	0.128	195.063	0.128	383.121	0.128	93.452	0.128	321.024	0.128	276.666	0.128	379.913	0.128	1650.49	0.128	364.693	0.128	356	0.128	405	0.128	686
					4	0.192	377	0.192	892.837	0.192	290.326	0.192	289.654	0.192	672.444	0.192	439	0.192	300.242	0.192	265.597	0.192	240.07	0.192	1497.28	0.192	482.444	0.192	198.051	0.192	354.136	0.192	282.981	0.192	326.001	0.192	255.494	0.192	394.11	0.192	2350.15	0.192	368.312	0.192	317	0.192	351	0.192	654
					5	0.256	414	0.256	1243.41	0.256	287.592	0.256	268.083	0.256	690.355	0.256	857	0.256	288.011	0.256	266.871	0.256	343.719	0.256	1961.03	0.256	470.941	0.256	202.373	0.256	332.084	0.256	709.878	0.256	341.277	0.256	239.474	0.256	439.097	0.256	2810.92	0.256	388.828	0.256	298	0.256	381	0.256	622
					6	0.32	411	0.32	1459.69	0.32	298.132	0.32	248.721	0.32	675.613	0.32	1302	0.32	288.831	0.32	271.585	0.32	713.494	0.32	1879.79	0.32	438.819	0.32	211.974	0.32	342.058	0.32	1369.65	0.32	330.18	0.32	221.45	0.32	486.914	0.32	2953.58	0.32	452.983	0.32	300	0.32	461	0.32	543
					7	0.384	369	0.384	1527.78	0.384	291.714	0.384	248.885	0.384	618.669	0.384	1542	0.384	308.805	0.384	269.449	0.384	1516.43	0.384	1381.44	0.384	398.126	0.384	219.971	0.384	353.739	0.384	2100.14	0.384	308.669	0.384	203.589	0.384	536.437	0.384	2560.28	0.384	500.835	0.384	321	0.384	561	0.384	446
					8	0.448	326	0.448	1578.28	0.448	301.676	0.448	250.074	0.448	600.458	0.448	1691	0.448	346.635	0.448	242.323	0.448	2255.8	0.448	755.793	0.448	348.976	0.448	215.76	0.448	391.531	0.448	2563.93	0.448	306.031	0.448	192.847	0.448	631.256	0.448	2128.47	0.448	464.067	0.448	351	0.448	618	0.448	349
					9	0.512	339.533	0.512	1686.34	0.512	311.923	0.512	247.033	0.512	595.001	0.512	1855	0.512	359.249	0.512	238.199	0.512	2107.1	0.512	315.055	0.512	330.61	0.512	216.132	0.512	418.694	0.512	2738.45	0.512	329.006	0.512	197.831	0.512	677.35	0.512	1557.29	0.512	419.081	0.512	303	0.512	695.296	0.512	640.24
					10	0.576	365.567	0.576	1615.28	0.576	330.391	0.576	232.111	0.576	550.705	0.576	1883.96	0.576	358.627	0.576	247.194	0.576	1208.53	0.576	128.68	0.576	323.702	0.576	206.493	0.576	431.835	0.576	2588.97	0.576	316.054	0.576	219.866	0.576	633.391	0.576	1031.98	0.576	366.789	0.576	277	0.576	669.339	0.576	867.466
					11	0.64	394.801	0.64	1489.95	0.64	356.528	0.64	234.725	0.64	501.216	0.64	1809.44	0.64	366.964	0.64	239.915	0.64	497.574	0.64	77.296	0.64	340.127	0.64	194.472	0.64	486.473	0.64	2396.85	0.64	316.16	0.64	244.151	0.64	562.532	0.64	691.899	0.64	345.09	0.64	256	0.64	605.487	0.64	933.692
					12	0.704	410.43	0.704	1269.89	0.704	403.016	0.704	257.774	0.704	493.4	0.704	1694.51	0.704	381.082	0.704	232.346	NA	NA	NA	NA	0.704	354.249	0.704	190.393	0.704	472.4	0.704	2457.68	0.704	349.692	0.704	247.318	0.704	505.363	0.704	474.918	0.704	316.772	0.704	249	0.704	512.315	0.704	839.256
					13	0.768	393.84	0.768	923.682	0.768	421.061	0.768	276.937	0.768	485.19	0.768	1632.28	0.768	387.488	0.768	243.794	NA	NA	NA	NA	0.768	367.124	0.768	192.53	0.768	406.276	0.768	2540.43	0.768	357.233	0.768	265.38	0.768	466.243	0.768	323.983	0.768	304.969	0.768	272	0.768	467.891	0.768	646.513
					14	0.832	387.433	0.832	590.538	0.832	398.819	0.832	271.311	0.832	515.247	0.832	1649.97	0.832	383.444	0.832	267.187	NA	NA	NA	NA	0.832	372.714	0.832	201.613	0.832	331.687	0.832	2514.73	0.832	387.099	0.832	269.608	0.832	414.146	0.832	262.628	0.832	301.038	0.832	309	0.832	448.315	0.832	451.886
					15	0.896	391.94	0.896	416.603	0.896	387.747	0.896	257.851	0.896	620.284	0.896	1807.3	0.896	362.503	0.896	278.842	NA	NA	NA	NA	0.896	373.175	0.896	217.776	0.896	286.095	0.896	2435.25	0.896	419.474	0.896	286.242	0.896	370.082	0.896	207.918	0.896	319.802	0.896	277	0.896	421.528	0.896	340.712
					16	0.96	379.058	0.96	509.8	0.96	395.362	0.96	262.959	0.96	728.955	0.96	2070.62	0.96	372.908	0.96	276.905	NA	NA	NA	NA	0.96	368.51	0.96	217.868	0.96	271.077	0.96	2247.05	0.96	391.394	0.96	284.26	NA	NA	NA	NA	0.96	336.255	0.96	253	0.96	381.031	0.96	203.893
					17	1.024	344.531	1.024	558.628	1.024	368.751	1.024	252.589	1.024	835.528	1.024	2320.99	1.024	364.679	1.024	264.763	NA	NA	NA	NA	1.024	359.182	1.024	207.641	1.024	279.958	1.024	2152.18	1.024	363.606	1.024	265.001	NA	NA	NA	NA	1.024	340.509	1.024	248	1.024	297.858	1.024	143.739
					18	1.088	337.58	1.088	589.884	1.088	326.579	1.088	254.321	1.088	910.877	1.088	2517.84	1.088	380	1.088	246.957	NA	NA	NA	NA	1.088	353.079	1.088	202.559	1.088	295.862	1.088	2192.86	1.088	322.588	1.088	257.192	NA	NA	NA	NA	1.088	345.89	1.088	259	1.088	239.735	1.088	88.28
					19	1.152	342.805	1.152	591.738	1.152	313.027	1.152	255.427	1.152	971.443	1.152	2570.03	1.152	391.501	1.152	235.199	NA	NA	NA	NA	1.152	354.328	1.152	217.192	1.152	278.677	1.152	2305.72	1.152	302.991	1.152	261.324	NA	NA	NA	NA	1.152	342.387	1.152	245	NA	NA	NA	NA
					20	1.216	331.31	1.216	584.209	1.216	327.845	1.216	265.654	1.216	994.874	1.216	2378.98	1.216	378.663	1.216	243.763	NA	NA	NA	NA	1.216	356.704	1.216	212.869	1.216	257.484	1.216	2573.06	1.216	329.904	1.216	267.568	NA	NA	NA	NA	1.216	333.751	1.216	244	NA	NA	NA	NA
					21	1.28	311.839	1.28	580.214	1.28	349.832	1.28	271.229	1.28	958.679	1.28	2158.73	1.28	373.575	1.28	249.774	NA	NA	NA	NA	1.28	339.944	1.28	220.185	1.28	270.413	1.28	2810.48	1.28	346.101	1.28	284.95	NA	NA	NA	NA	1.28	345.803	1.28	255	NA	NA	NA	NA
					22	1.344	292.28	NA	NA	1.344	376.674	1.344	269.545	1.344	941.772	1.344	1894.49	1.344	403.104	1.344	270.198	NA	NA	NA	NA	1.344	315.982	1.344	236.569	1.344	319.572	1.344	2868.31	1.344	362.956	1.344	308.547	NA	NA	NA	NA	1.344	364.255	1.344	264	NA	NA	NA	NA
					23	NA	NA	NA	NA	1.408	374.753	1.408	274.853	1.408	914.742	1.408	1464.97	1.408	413.751	1.408	278.506	NA	NA	NA	NA	1.408	294.714	1.408	224.28	1.408	340.264	1.408	2782	1.408	344.396	1.408	330.525	NA	NA	NA	NA	1.408	387.031	1.408	285	NA	NA	NA	NA
					24	NA	NA	NA	NA	1.472	375.354	1.472	267.836	1.472	873.671	1.472	1010.39	1.472	382.392	1.472	262.704	NA	NA	NA	NA	1.472	280.571	1.472	227.541	1.472	345.13	1.472	2577.58	1.472	331.724	1.472	334.83	NA	NA	NA	NA	1.472	375.922	1.472	296	NA	NA	NA	NA
					25	NA	NA	NA	NA	1.536	395.186	1.536	262.245	1.536	758.9	1.536	620.296	1.536	375.921	1.536	261.446	NA	NA	NA	NA	1.536	272.532	1.536	257.023	1.536	371.249	1.536	2419.76	1.536	297.724	1.536	337.345	NA	NA	NA	NA	1.536	347.866	1.536	298	NA	NA	NA	NA
					26	NA	NA	NA	NA	1.6	391.105	1.6	269.77	1.6	632.463	1.6	319.238	1.6	376.696	1.6	275.023	NA	NA	NA	NA	1.6	259.817	1.6	253.057	1.6	372.101	1.6	2277.19	1.6	271.528	1.6	344.122	NA	NA	NA	NA	1.6	340.886	1.6	281	NA	NA	NA	NA
					27	NA	NA	NA	NA	1.664	376.38	1.664	267.865	1.664	543.806	NA	NA	1.664	374.105	1.664	288.74	NA	NA	NA	NA	1.664	287.912	1.664	231.461	1.664	325.564	1.664	2213.71	1.664	268.858	1.664	316.045	NA	NA	NA	NA	1.664	362.386	1.664	248.997	NA	NA	NA	NA
					28	NA	NA	NA	NA	1.728	373.286	1.728	253.927	1.728	473.431	NA	NA	1.728	369.422	1.728	312.466	NA	NA	NA	NA	1.728	357.826	1.728	250.48	1.728	328.198	1.728	2291.26	1.728	290.865	1.728	299.585	NA	NA	NA	NA	1.728	394.992	1.728	266.626	NA	NA	NA	NA
					29	NA	NA	NA	NA	1.792	395.299	1.792	235.737	1.792	411.3	NA	NA	1.792	393.95	1.792	326.205	NA	NA	NA	NA	1.792	413.356	1.792	269.595	1.792	372.102	1.792	2436.24	1.792	266.012	1.792	293.223	NA	NA	NA	NA	1.792	414.024	1.792	301.732	NA	NA	NA	NA
					30	NA	NA	NA	NA	1.856	414.991	1.856	241.058	1.856	366.561	NA	NA	1.856	439.97	1.856	290.191	NA	NA	NA	NA	1.856	450.486	1.856	263.306	1.856	425.428	1.856	2661.02	1.856	252.236	1.856	272.967	NA	NA	NA	NA	1.856	421.324	1.856	298.217	NA	NA	NA	NA
					31	NA	NA	NA	NA	1.92	436.304	1.92	237.966	NA	NA	NA	NA	1.92	453.31	1.92	279.732	NA	NA	NA	NA	1.92	433.542	1.92	249.073	1.92	436.406	1.92	2956.24	1.92	237.241	1.92	251.373	NA	NA	NA	NA	1.92	410.979	1.92	300.467	NA	NA	NA	NA
					32	NA	NA	NA	NA	1.984	447.05	1.984	221.291	NA	NA	NA	NA	1.984	443.49	1.984	276.344	NA	NA	NA	NA	1.984	382.091	1.984	223.327	1.984	395.695	1.984	2942.89	1.984	237.352	1.984	260.198	NA	NA	NA	NA	1.984	404.289	1.984	302.365	NA	NA	NA	NA
					33	NA	NA	NA	NA	2.048	437.4	2.048	226.659	NA	NA	NA	NA	2.048	461.87	2.048	259.81	NA	NA	NA	NA	2.048	328.152	2.048	218.373	2.048	371.635	2.048	2399.2	2.048	237.979	2.048	261.844	NA	NA	NA	NA	2.048	409.769	2.048	296.935	NA	NA	NA	NA
					34	NA	NA	NA	NA	2.112	406.04	2.112	219.487	NA	NA	NA	NA	2.112	472.86	2.112	254.967	NA	NA	NA	NA	2.112	317.182	2.112	224.565	2.112	389.106	2.112	1573.71	2.112	257.81	2.112	271.39	NA	NA	NA	NA	2.112	391.379	2.112	281.397	NA	NA	NA	NA
					35	NA	NA	NA	NA	2.176	400.759	2.176	220.218	NA	NA	NA	NA	2.176	448.15	2.176	262.368	NA	NA	NA	NA	2.176	308.646	2.176	229.195	2.176	420.249	2.176	868.575	2.176	270.186	2.176	263.575	NA	NA	NA	NA	2.176	354.902	2.176	274.048	NA	NA	NA	NA
					36	NA	NA	NA	NA	2.24	374.02	2.24	224.09	NA	NA	NA	NA	2.24	414.11	2.24	273.931	NA	NA	NA	NA	2.24	305.067	2.24	245.905	2.24	442.016	2.24	380.585	2.24	274.145	2.24	265.946	NA	NA	NA	NA	2.24	320.235	2.24	301.431	NA	NA	NA	NA
					37	NA	NA	NA	NA	2.304	330.534	2.304	232.843	NA	NA	NA	NA	2.304	409.552	2.304	293.189	NA	NA	NA	NA	2.304	303.468	2.304	248.812	2.304	501.805	2.304	129.035	2.304	279.431	2.304	281.155	NA	NA	NA	NA	2.304	293.752	2.304	304.502	NA	NA	NA	NA
					38	NA	NA	NA	NA	2.368	301.323	2.368	255.891	NA	NA	NA	NA	2.368	430.139	2.368	307.922	NA	NA	NA	NA	2.368	288.23	2.368	252.439	2.368	534.4	2.368	51.341	2.368	282.823	2.368	269.095	NA	NA	NA	NA	2.368	317.238	2.368	284.528	NA	NA	NA	NA
					39	NA	NA	NA	NA	2.432	287.562	2.432	256.211	NA	NA	NA	NA	2.432	426.484	2.432	308.291	NA	NA	NA	NA	2.432	309.246	2.432	281.313	2.432	490.4	2.432	40.822	2.432	284.19	2.432	242.087	NA	NA	NA	NA	2.432	363.001	2.432	274.188	NA	NA	NA	NA
					40	NA	NA	NA	NA	2.496	272.717	2.496	246.984	NA	NA	NA	NA	2.496	402.581	2.496	314.675	NA	NA	NA	NA	2.496	325.888	2.496	275.53	2.496	452.6	2.496	58.193	2.496	293.839	2.496	256.639	NA	NA	NA	NA	2.496	396.553	2.496	284.219	NA	NA	NA	NA
					41	NA	NA	NA	NA	2.56	287.807	2.56	257.494	NA	NA	NA	NA	2.56	379.195	2.56	336.337	NA	NA	NA	NA	2.56	320.22	2.56	234.569	2.56	457.316	NA	NA	2.56	314.87	2.56	297.45	NA	NA	NA	NA	2.56	399.387	2.56	291.241	NA	NA	NA	NA
					42	NA	NA	NA	NA	2.624	300.645	2.624	261.781	NA	NA	NA	NA	2.624	351.925	2.624	345.056	NA	NA	NA	NA	2.624	298.418	2.624	223.053	2.624	440.945	NA	NA	2.624	345.873	2.624	318.948	NA	NA	NA	NA	2.624	413.305	2.624	271.565	NA	NA	NA	NA
					43	NA	NA	NA	NA	2.688	305.61	2.688	246.578	NA	NA	NA	NA	2.688	347.566	2.688	331.694	NA	NA	NA	NA	2.688	294.687	2.688	212.715	2.688	379.836	NA	NA	2.688	364.097	2.688	301.68	NA	NA	NA	NA	2.688	415.76	2.688	258.999	NA	NA	NA	NA
					44	NA	NA	NA	NA	2.752	297.533	2.752	239.493	NA	NA	NA	NA	2.752	367.383	2.752	317.434	NA	NA	NA	NA	2.752	291.277	2.752	210.812	2.752	332.196	NA	NA	2.752	363.211	2.752	280.032	NA	NA	NA	NA	2.752	384.063	2.752	282.726	NA	NA	NA	NA
					45	NA	NA	NA	NA	2.816	280.65	2.816	240.052	NA	NA	NA	NA	2.816	380.472	2.816	309.107	NA	NA	NA	NA	2.816	316.822	2.816	236.359	2.816	343.645	NA	NA	2.816	331.899	2.816	305.216	NA	NA	NA	NA	2.816	341.165	2.816	306.489	NA	NA	NA	NA
					46	NA	NA	NA	NA	2.88	254.341	2.88	246.83	NA	NA	NA	NA	2.88	388.44	2.88	293.986	NA	NA	NA	NA	2.88	320.433	2.88	232.88	2.88	350.59	NA	NA	2.88	325.937	2.88	304.34	NA	NA	NA	NA	2.88	336.771	2.88	287.233	NA	NA	NA	NA
					47	NA	NA	NA	NA	2.944	244.493	2.944	250.222	NA	NA	NA	NA	2.944	377.36	2.944	287.945	NA	NA	NA	NA	2.944	297.426	2.944	217.58	2.944	313.1	NA	NA	2.944	333.538	2.944	303.656	NA	NA	NA	NA	2.944	334.146	2.944	259.599	NA	NA	NA	NA
					48	NA	NA	NA	NA	3.008	237.091	3.008	257.658	NA	NA	NA	NA	3.008	379.64	3.008	284.775	NA	NA	NA	NA	3.008	284.149	3.008	226.728	NA	NA	NA	NA	3.008	317.706	3.008	319.29	NA	NA	NA	NA	3.008	331.933	3.008	229.844	NA	NA	NA	NA
					49	NA	NA	NA	NA	3.072	261.703	3.072	276.785	NA	NA	NA	NA	3.072	393.6	3.072	282.042	NA	NA	NA	NA	3.072	267.685	3.072	241.751	NA	NA	NA	NA	3.072	296.85	3.072	312.094	NA	NA	NA	NA	3.072	317.402	3.072	224.93	NA	NA	NA	NA
					50	NA	NA	NA	NA	3.136	282.627	3.136	270.688	NA	NA	NA	NA	3.136	371.68	3.136	270.944	NA	NA	NA	NA	3.136	253.602	3.136	239.25	NA	NA	NA	NA	3.136	287.702	3.136	306.888	NA	NA	NA	NA	3.136	342.664	3.136	212.315	NA	NA	NA	NA
					51	NA	NA	NA	NA	3.2	271.87	3.2	259.974	NA	NA	NA	NA	3.2	325.8	3.2	275.574	NA	NA	NA	NA	3.2	235.966	3.2	236.71	NA	NA	NA	NA	3.2	296.978	3.2	308.682	NA	NA	NA	NA	3.2	396.699	3.2	203.152	NA	NA	NA	NA
					52	NA	NA	NA	NA	3.264	260.227	3.264	224.289	NA	NA	NA	NA	3.264	295.502	3.264	293.783	NA	NA	NA	NA	3.264	245.71	3.264	256.28	NA	NA	NA	NA	3.264	325.306	3.264	309.424	NA	NA	NA	NA	3.264	428.982	3.264	215.429	NA	NA	NA	NA
					53	NA	NA	NA	NA	3.328	268.52	3.328	216.072	NA	NA	NA	NA	3.328	278.051	3.328	311.575	NA	NA	NA	NA	3.328	252.774	3.328	234.298	NA	NA	NA	NA	3.328	361.812	3.328	323.232	NA	NA	NA	NA	3.328	500.748	3.328	224.245	NA	NA	NA	NA
					54	NA	NA	NA	NA	3.392	278.313	3.392	228.307	NA	NA	NA	NA	3.392	272.284	3.392	322.093	NA	NA	NA	NA	3.392	263.126	3.392	226.438	NA	NA	NA	NA	3.392	247.14	3.392	306.569	NA	NA	NA	NA	3.392	563.419	3.392	228.974	NA	NA	NA	NA
					55	NA	NA	NA	NA	3.456	288.688	3.456	242.386	NA	NA	NA	NA	3.456	288.172	3.456	314.288	NA	NA	NA	NA	3.456	259.322	3.456	229.754	NA	NA	NA	NA	NA	NA	3.456	259.135	NA	NA	NA	NA	3.456	555.043	3.456	218.973	NA	NA	NA	NA
					56	NA	NA	NA	NA	3.52	310.234	3.52	246.664	NA	NA	NA	NA	3.52	334.838	3.52	297.24	NA	NA	NA	NA	3.52	265.409	3.52	234.924	NA	NA	NA	NA	NA	NA	3.52	222.689	NA	NA	NA	NA	3.52	532.01	3.52	224.914	NA	NA	NA	NA
					57	NA	NA	NA	NA	3.584	343.082	3.584	254.71	NA	NA	NA	NA	3.584	393.215	3.584	303.443	NA	NA	NA	NA	3.584	317.474	3.584	255.619	NA	NA	NA	NA	NA	NA	3.584	213.727	NA	NA	NA	NA	3.584	526.677	3.584	232.117	NA	NA	NA	NA
					58	NA	NA	NA	NA	NA	NA	3.648	252.171	NA	NA	NA	NA	3.648	435.872	3.648	312.987	NA	NA	NA	NA	3.648	387.358	3.648	286.286	NA	NA	NA	NA	NA	NA	3.648	225.023	NA	NA	NA	NA	3.648	494.487	3.648	234.016	NA	NA	NA	NA
					59	NA	NA	NA	NA	NA	NA	3.712	250.405	NA	NA	NA	NA	3.712	513.27	3.712	296.559	NA	NA	NA	NA	3.712	440.098	3.712	290.5	NA	NA	NA	NA	NA	NA	3.712	245.754	NA	NA	NA	NA	NA	NA	3.712	248.4	NA	NA	NA	NA
					60	NA	NA	NA	NA	NA	NA	3.776	253.951	NA	NA	NA	NA	3.776	823.94	3.776	278.593	NA	NA	NA	NA	3.776	437.788	3.776	294.974	NA	NA	NA	NA	NA	NA	3.776	252.43	NA	NA	NA	NA	NA	NA	3.776	250.9	NA	NA	NA	NA
					61	NA	NA	NA	NA	NA	NA	3.84	244.633	NA	NA	NA	NA	3.84	1522.02	3.84	279.891	NA	NA	NA	NA	3.84	466.505	3.84	262.572	NA	NA	NA	NA	NA	NA	3.84	250.908	NA	NA	NA	NA	NA	NA	NA	NA	NA	NA	NA	NA
					62	NA	NA	NA	NA	NA	NA	3.904	243.911	NA	NA	NA	NA	3.904	2167.18	3.904	284.341	NA	NA	NA	NA	3.904	468.554	3.904	256.378	NA	NA	NA	NA	NA	NA	3.904	246.576	NA	NA	NA	NA	NA	NA	NA	NA	NA	NA	NA	NA
					63	NA	NA	NA	NA	NA	NA	3.968	252.967	NA	NA	NA	NA	3.968	1908.68	3.968	282.169	NA	NA	NA	NA	3.968	397.481	3.968	276.1	NA	NA	NA	NA	NA	NA	3.968	241.75	NA	NA	NA	NA	NA	NA	NA	NA	NA	NA	NA	NA
					64	NA	NA	NA	NA	NA	NA	4.032	259.595	NA	NA	NA	NA	4.032	1330.92	4.032	281.914	NA	NA	NA	NA	4.032	341.957	4.032	270.786	NA	NA	NA	NA	NA	NA	4.032	231.085	NA	NA	NA	NA	NA	NA	NA	NA	NA	NA	NA	NA
					65	NA	NA	NA	NA	NA	NA	4.096	250.205	NA	NA	NA	NA	NA	NA	4.096	277.912	NA	NA	NA	NA	4.096	304.684	4.096	258.391	NA	NA	NA	NA	NA	NA	4.096	238.591	NA	NA	NA	NA	NA	NA	NA	NA	NA	NA	NA	NA
					66	NA	NA	NA	NA	NA	NA	4.16	257.016	NA	NA	NA	NA	NA	NA	4.16	283.878	NA	NA	NA	NA	4.16	295.997	4.16	247.182	NA	NA	NA	NA	NA	NA	4.16	242.772	NA	NA	NA	NA	NA	NA	NA	NA	NA	NA	NA	NA
					67	NA	NA	NA	NA	NA	NA	4.224	252.658	NA	NA	NA	NA	NA	NA	4.224	300.426	NA	NA	NA	NA	4.224	294.014	4.224	252.683	NA	NA	NA	NA	NA	NA	4.224	232.499	NA	NA	NA	NA	NA	NA	NA	NA	NA	NA	NA	NA
					68	NA	NA	NA	NA	NA	NA	4.288	252.117	NA	NA	NA	NA	NA	NA	4.288	304.949	NA	NA	NA	NA	4.288	286.815	4.288	245	NA	NA	NA	NA	NA	NA	4.288	219.576	NA	NA	NA	NA	NA	NA	NA	NA	NA	NA	NA	NA
					69	NA	NA	NA	NA	NA	NA	4.352	254.007	NA	NA	NA	NA	NA	NA	4.352	309.275	NA	NA	NA	NA	4.352	288.49	4.352	254.877	NA	NA	NA	NA	NA	NA	4.352	221.254	NA	NA	NA	NA	NA	NA	NA	NA	NA	NA	NA	NA
					70	NA	NA	NA	NA	NA	NA	4.416	248.601	NA	NA	NA	NA	NA	NA	4.416	304.865	NA	NA	NA	NA	4.416	305.979	4.416	271.897	NA	NA	NA	NA	NA	NA	4.416	227.758	NA	NA	NA	NA	NA	NA	NA	NA	NA	NA	NA	NA
					71	NA	NA	NA	NA	NA	NA	4.48	255.341	NA	NA	NA	NA	NA	NA	4.48	280.31	NA	NA	NA	NA	4.48	337.4	4.48	270.154	NA	NA	NA	NA	NA	NA	4.48	224.536	NA	NA	NA	NA	NA	NA	NA	NA	NA	NA	NA	NA
					72	NA	NA	NA	NA	NA	NA	NA	NA	NA	NA	NA	NA	NA	NA	4.544	269.777	NA	NA	NA	NA	4.544	340.587	4.544	262.492	NA	NA	NA	NA	NA	NA	4.544	210.324	NA	NA	NA	NA	NA	NA	NA	NA	NA	NA	NA	NA
					73	NA	NA	NA	NA	NA	NA	NA	NA	NA	NA	NA	NA	NA	NA	4.608	264.207	NA	NA	NA	NA	4.608	339.914	4.608	267.471	NA	NA	NA	NA	NA	NA	4.608	212.157	NA	NA	NA	NA	NA	NA	NA	NA	NA	NA	NA	NA
					74	NA	NA	NA	NA	NA	NA	NA	NA	NA	NA	NA	NA	NA	NA	4.672	258.721	NA	NA	NA	NA	4.672	349.873	4.672	281.458	NA	NA	NA	NA	NA	NA	4.672	213.396	NA	NA	NA	NA	NA	NA	NA	NA	NA	NA	NA	NA
					75	NA	NA	NA	NA	NA	NA	NA	NA	NA	NA	NA	NA	NA	NA	4.736	271.727	NA	NA	NA	NA	4.736	356.676	4.736	290.839	NA	NA	NA	NA	NA	NA	4.736	223.131	NA	NA	NA	NA	NA	NA	NA	NA	NA	NA	NA	NA
					76	NA	NA	NA	NA	NA	NA	NA	NA	NA	NA	NA	NA	NA	NA	4.8	273.047	NA	NA	NA	NA	4.8	340.141	4.8	282.711	NA	NA	NA	NA	NA	NA	4.8	231.539	NA	NA	NA	NA	NA	NA	NA	NA	NA	NA	NA	NA
					77	NA	NA	NA	NA	NA	NA	NA	NA	NA	NA	NA	NA	NA	NA	4.864	264.506	NA	NA	NA	NA	4.864	319.767	4.864	283.923	NA	NA	NA	NA	NA	NA	4.864	226.143	NA	NA	NA	NA	NA	NA	NA	NA	NA	NA	NA	NA
					78	NA	NA	NA	NA	NA	NA	NA	NA	NA	NA	NA	NA	NA	NA	4.928	268.873	NA	NA	NA	NA	4.928	301.327	4.928	244.65	NA	NA	NA	NA	NA	NA	4.928	226.974	NA	NA	NA	NA	NA	NA	NA	NA	NA	NA	NA	NA
					79	NA	NA	NA	NA	NA	NA	NA	NA	NA	NA	NA	NA	NA	NA	4.992	274.295	NA	NA	NA	NA	4.992	280.033	4.992	211.159	NA	NA	NA	NA	NA	NA	4.992	244.411	NA	NA	NA	NA	NA	NA	NA	NA	NA	NA	NA	NA
					80	NA	NA	NA	NA	NA	NA	NA	NA	NA	NA	NA	NA	NA	NA	5.056	270.388	NA	NA	NA	NA	5.056	271.269	5.056	195.04	NA	NA	NA	NA	NA	NA	5.056	246.005	NA	NA	NA	NA	NA	NA	NA	NA	NA	NA	NA	NA
					81	NA	NA	NA	NA	NA	NA	NA	NA	NA	NA	NA	NA	NA	NA	5.12	270.258	NA	NA	NA	NA	5.12	276.185	5.12	185.177	NA	NA	NA	NA	NA	NA	5.12	231.603	NA	NA	NA	NA	NA	NA	NA	NA	NA	NA	NA	NA
					82	NA	NA	NA	NA	NA	NA	NA	NA	NA	NA	NA	NA	NA	NA	5.184	271.098	NA	NA	NA	NA	5.184	260.407	5.184	211.992	NA	NA	NA	NA	NA	NA	5.184	229.937	NA	NA	NA	NA	NA	NA	NA	NA	NA	NA	NA	NA
					83	NA	NA	NA	NA	NA	NA	NA	NA	NA	NA	NA	NA	NA	NA	5.248	274.354	NA	NA	NA	NA	5.248	252.639	5.248	248.438	NA	NA	NA	NA	NA	NA	5.248	215.328	NA	NA	NA	NA	NA	NA	NA	NA	NA	NA	NA	NA
					84	NA	NA	NA	NA	NA	NA	NA	NA	NA	NA	NA	NA	NA	NA	5.312	280.275	NA	NA	NA	NA	5.312	246.921	5.312	261.21	NA	NA	NA	NA	NA	NA	5.312	212.311	NA	NA	NA	NA	NA	NA	NA	NA	NA	NA	NA	NA
					85	NA	NA	NA	NA	NA	NA	NA	NA	NA	NA	NA	NA	NA	NA	5.376	296.404	NA	NA	NA	NA	5.376	257.467	5.376	251.059	NA	NA	NA	NA	NA	NA	5.376	219.224	NA	NA	NA	NA	NA	NA	NA	NA	NA	NA	NA	NA
					86	NA	NA	NA	NA	NA	NA	NA	NA	NA	NA	NA	NA	NA	NA	5.44	294.582	NA	NA	NA	NA	5.44	264.964	5.44	237.251	NA	NA	NA	NA	NA	NA	5.44	221.316	NA	NA	NA	NA	NA	NA	NA	NA	NA	NA	NA	NA
					87	NA	NA	NA	NA	NA	NA	NA	NA	NA	NA	NA	NA	NA	NA	5.504	282.106	NA	NA	NA	NA	5.504	252.366	5.504	219.793	NA	NA	NA	NA	NA	NA	5.504	284.481	NA	NA	NA	NA	NA	NA	NA	NA	NA	NA	NA	NA
					88	NA	NA	NA	NA	NA	NA	NA	NA	NA	NA	NA	NA	NA	NA	5.568	271.058	NA	NA	NA	NA	5.568	240.807	5.568	220.546	NA	NA	NA	NA	NA	NA	5.568	268.394	NA	NA	NA	NA	NA	NA	NA	NA	NA	NA	NA	NA
					89	NA	NA	NA	NA	NA	NA	NA	NA	NA	NA	NA	NA	NA	NA	5.632	252.435	NA	NA	NA	NA	5.632	252.72	5.632	241.102	NA	NA	NA	NA	NA	NA	5.632	240.836	NA	NA	NA	NA	NA	NA	NA	NA	NA	NA	NA	NA
					90	NA	NA	NA	NA	NA	NA	NA	NA	NA	NA	NA	NA	NA	NA	5.696	260.697	NA	NA	NA	NA	5.696	307.44	5.696	255.588	NA	NA	NA	NA	NA	NA	5.696	236.472	NA	NA	NA	NA	NA	NA	NA	NA	NA	NA	NA	NA
					91	NA	NA	NA	NA	NA	NA	NA	NA	NA	NA	NA	NA	NA	NA	5.76	277.49	NA	NA	NA	NA	5.76	395.04	5.76	263.955	NA	NA	NA	NA	NA	NA	5.76	247.478	NA	NA	NA	NA	NA	NA	NA	NA	NA	NA	NA	NA
					92	NA	NA	NA	NA	NA	NA	NA	NA	NA	NA	NA	NA	NA	NA	5.824	274.844	NA	NA	NA	NA	5.824	424.32	5.824	279.076	NA	NA	NA	NA	NA	NA	5.824	258.715	NA	NA	NA	NA	NA	NA	NA	NA	NA	NA	NA	NA
					93	NA	NA	NA	NA	NA	NA	NA	NA	NA	NA	NA	NA	NA	NA	5.888	278.212	NA	NA	NA	NA	NA	NA	5.888	242.651	NA	NA	NA	NA	NA	NA	5.888	258.594	NA	NA	NA	NA	NA	NA	NA	NA	NA	NA	NA	NA
					94	NA	NA	NA	NA	NA	NA	NA	NA	NA	NA	NA	NA	NA	NA	5.952	292.775	NA	NA	NA	NA	NA	NA	5.952	205.417	NA	NA	NA	NA	NA	NA	5.952	256.213	NA	NA	NA	NA	NA	NA	NA	NA	NA	NA	NA	NA
					95	NA	NA	NA	NA	NA	NA	NA	NA	NA	NA	NA	NA	NA	NA	6.016	267.716	NA	NA	NA	NA	NA	NA	6.016	202.196	NA	NA	NA	NA	NA	NA	6.016	256.569	NA	NA	NA	NA	NA	NA	NA	NA	NA	NA	NA	NA
					96	NA	NA	NA	NA	NA	NA	NA	NA	NA	NA	NA	NA	NA	NA	6.08	248.665	NA	NA	NA	NA	NA	NA	6.08	227.178	NA	NA	NA	NA	NA	NA	6.08	262.006	NA	NA	NA	NA	NA	NA	NA	NA	NA	NA	NA	NA
					97	NA	NA	NA	NA	NA	NA	NA	NA	NA	NA	NA	NA	NA	NA	6.144	256.982	NA	NA	NA	NA	NA	NA	6.144	263.788	NA	NA	NA	NA	NA	NA	6.144	267.401	NA	NA	NA	NA	NA	NA	NA	NA	NA	NA	NA	NA
					98	NA	NA	NA	NA	NA	NA	NA	NA	NA	NA	NA	NA	NA	NA	6.208	282.22	NA	NA	NA	NA	NA	NA	NA	NA	NA	NA	NA	NA	NA	NA	6.208	259.024	NA	NA	NA	NA	NA	NA	NA	NA	NA	NA	NA	NA
					99	NA	NA	NA	NA	NA	NA	NA	NA	NA	NA	NA	NA	NA	NA	6.272	282.928	NA	NA	NA	NA	NA	NA	NA	NA	NA	NA	NA	NA	NA	NA	6.272	243.789	NA	NA	NA	NA	NA	NA	NA	NA	NA	NA	NA	NA
					100	NA	NA	NA	NA	NA	NA	NA	NA	NA	NA	NA	NA	NA	NA	6.336	278.249	NA	NA	NA	NA	NA	NA	NA	NA	NA	NA	NA	NA	NA	NA	6.336	247.535	NA	NA	NA	NA	NA	NA	NA	NA	NA	NA	NA	NA
					101	NA	NA	NA	NA	NA	NA	NA	NA	NA	NA	NA	NA	NA	NA	6.4	269.616	NA	NA	NA	NA	NA	NA	NA	NA	NA	NA	NA	NA	NA	NA	6.4	271.655	NA	NA	NA	NA	NA	NA	NA	NA	NA	NA	NA	NA
					102	NA	NA	NA	NA	NA	NA	NA	NA	NA	NA	NA	NA	NA	NA	6.464	278.451	NA	NA	NA	NA	NA	NA	NA	NA	NA	NA	NA	NA	NA	NA	6.464	306.998	NA	NA	NA	NA	NA	NA	NA	NA	NA	NA	NA	NA
					103	NA	NA	NA	NA	NA	NA	NA	NA	NA	NA	NA	NA	NA	NA	6.528	282.366	NA	NA	NA	NA	NA	NA	NA	NA	NA	NA	NA	NA	NA	NA	6.528	291.509	NA	NA	NA	NA	NA	NA	NA	NA	NA	NA	NA	NA
					104	NA	NA	NA	NA	NA	NA	NA	NA	NA	NA	NA	NA	NA	NA	6.592	269.529	NA	NA	NA	NA	NA	NA	NA	NA	NA	NA	NA	NA	NA	NA	6.592	258.901	NA	NA	NA	NA	NA	NA	NA	NA	NA	NA	NA	NA
					105	NA	NA	NA	NA	NA	NA	NA	NA	NA	NA	NA	NA	NA	NA	6.656	284.135	NA	NA	NA	NA	NA	NA	NA	NA	NA	NA	NA	NA	NA	NA	6.656	256.006	NA	NA	NA	NA	NA	NA	NA	NA	NA	NA	NA	NA
					106	NA	NA	NA	NA	NA	NA	NA	NA	NA	NA	NA	NA	NA	NA	6.72	292.433	NA	NA	NA	NA	NA	NA	NA	NA	NA	NA	NA	NA	NA	NA	6.72	256.024	NA	NA	NA	NA	NA	NA	NA	NA	NA	NA	NA	NA
					107	NA	NA	NA	NA	NA	NA	NA	NA	NA	NA	NA	NA	NA	NA	6.784	277.497	NA	NA	NA	NA	NA	NA	NA	NA	NA	NA	NA	NA	NA	NA	6.784	252.455	NA	NA	NA	NA	NA	NA	NA	NA	NA	NA	NA	NA
					108	NA	NA	NA	NA	NA	NA	NA	NA	NA	NA	NA	NA	NA	NA	6.848	261.261	NA	NA	NA	NA	NA	NA	NA	NA	NA	NA	NA	NA	NA	NA	6.848	253.149	NA	NA	NA	NA	NA	NA	NA	NA	NA	NA	NA	NA
					109	NA	NA	NA	NA	NA	NA	NA	NA	NA	NA	NA	NA	NA	NA	6.912	259.925	NA	NA	NA	NA	NA	NA	NA	NA	NA	NA	NA	NA	NA	NA	6.912	256.332	NA	NA	NA	NA	NA	NA	NA	NA	NA	NA	NA	NA
					110	NA	NA	NA	NA	NA	NA	NA	NA	NA	NA	NA	NA	NA	NA	6.976	262.546	NA	NA	NA	NA	NA	NA	NA	NA	NA	NA	NA	NA	NA	NA	6.976	269.013	NA	NA	NA	NA	NA	NA	NA	NA	NA	NA	NA	NA
					111	NA	NA	NA	NA	NA	NA	NA	NA	NA	NA	NA	NA	NA	NA	NA	NA	NA	NA	NA	NA	NA	NA	NA	NA	NA	NA	NA	NA	NA	NA	7.04	269.643	NA	NA	NA	NA	NA	NA	NA	NA	NA	NA	NA	NA
					112	NA	NA	NA	NA	NA	NA	NA	NA	NA	NA	NA	NA	NA	NA	NA	NA	NA	NA	NA	NA	NA	NA	NA	NA	NA	NA	NA	NA	NA	NA	7.104	261.476	NA	NA	NA	NA	NA	NA	NA	NA	NA	NA	NA	NA
					113	NA	NA	NA	NA	NA	NA	NA	NA	NA	NA	NA	NA	NA	NA	NA	NA	NA	NA	NA	NA	NA	NA	NA	NA	NA	NA	NA	NA	NA	NA	7.168	270.752	NA	NA	NA	NA	NA	NA	NA	NA	NA	NA	NA	NA
					114	NA	NA	NA	NA	NA	NA	NA	NA	NA	NA	NA	NA	NA	NA	NA	NA	NA	NA	NA	NA	NA	NA	NA	NA	NA	NA	NA	NA	NA	NA	7.232	282.365	NA	NA	NA	NA	NA	NA	NA	NA	NA	NA	NA	NA
					115	NA	NA	NA	NA	NA	NA	NA	NA	NA	NA	NA	NA	NA	NA	NA	NA	NA	NA	NA	NA	NA	NA	NA	NA	NA	NA	NA	NA	NA	NA	7.296	285.458	NA	NA	NA	NA	NA	NA	NA	NA	NA	NA	NA	NA
					116	NA	NA	NA	NA	NA	NA	NA	NA	NA	NA	NA	NA	NA	NA	NA	NA	NA	NA	NA	NA	NA	NA	NA	NA	NA	NA	NA	NA	NA	NA	7.36	287.189	NA	NA	NA	NA	NA	NA	NA	NA	NA	NA	NA	NA
					117	NA	NA	NA	NA	NA	NA	NA	NA	NA	NA	NA	NA	NA	NA	NA	NA	NA	NA	NA	NA	NA	NA	NA	NA	NA	NA	NA	NA	NA	NA	7.424	272.132	NA	NA	NA	NA	NA	NA	NA	NA	NA	NA	NA	NA
					118	NA	NA	NA	NA	NA	NA	NA	NA	NA	NA	NA	NA	NA	NA	NA	NA	NA	NA	NA	NA	NA	NA	NA	NA	NA	NA	NA	NA	NA	NA	7.488	264.636	NA	NA	NA	NA	NA	NA	NA	NA	NA	NA	NA	NA
					119	NA	NA	NA	NA	NA	NA	NA	NA	NA	NA	NA	NA	NA	NA	NA	NA	NA	NA	NA	NA	NA	NA	NA	NA	NA	NA	NA	NA	NA	NA	7.552	277.299	NA	NA	NA	NA	NA	NA	NA	NA	NA	NA	NA	NA
					120	NA	NA	NA	NA	NA	NA	NA	NA	NA	NA	NA	NA	NA	NA	NA	NA	NA	NA	NA	NA	NA	NA	NA	NA	NA	NA	NA	NA	NA	NA	7.616	299.106	NA	NA	NA	NA	NA	NA	NA	NA	NA	NA	NA	NA
					121	NA	NA	NA	NA	NA	NA	NA	NA	NA	NA	NA	NA	NA	NA	NA	NA	NA	NA	NA	NA	NA	NA	NA	NA	NA	NA	NA	NA	NA	NA	7.68	312.805	NA	NA	NA	NA	NA	NA	NA	NA	NA	NA	NA	NA
					122	NA	NA	NA	NA	NA	NA	NA	NA	NA	NA	NA	NA	NA	NA	NA	NA	NA	NA	NA	NA	NA	NA	NA	NA	NA	NA	NA	NA	NA	NA	7.744	313.296	NA	NA	NA	NA	NA	NA	NA	NA	NA	NA	NA	NA
					123	NA	NA	NA	NA	NA	NA	NA	NA	NA	NA	NA	NA	NA	NA	NA	NA	NA	NA	NA	NA	NA	NA	NA	NA	NA	NA	NA	NA	NA	NA	7.808	295.976	NA	NA	NA	NA	NA	NA	NA	NA	NA	NA	NA	NA
					124	NA	NA	NA	NA	NA	NA	NA	NA	NA	NA	NA	NA	NA	NA	NA	NA	NA	NA	NA	NA	NA	NA	NA	NA	NA	NA	NA	NA	NA	NA	7.872	281.284	NA	NA	NA	NA	NA	NA	NA	NA	NA	NA	NA	NA
					125	NA	NA	NA	NA	NA	NA	NA	NA	NA	NA	NA	NA	NA	NA	NA	NA	NA	NA	NA	NA	NA	NA	NA	NA	NA	NA	NA	NA	NA	NA	7.936	271.342	NA	NA	NA	NA	NA	NA	NA	NA	NA	NA	NA	NA
					126	NA	NA	NA	NA	NA	NA	NA	NA	NA	NA	NA	NA	NA	NA	NA	NA	NA	NA	NA	NA	NA	NA	NA	NA	NA	NA	NA	NA	NA	NA	8	256.16	NA	NA	NA	NA	NA	NA	NA	NA	NA	NA	NA	NA
					127	NA	NA	NA	NA	NA	NA	NA	NA	NA	NA	NA	NA	NA	NA	NA	NA	NA	NA	NA	NA	NA	NA	NA	NA	NA	NA	NA	NA	NA	NA	8.064	265.033	NA	NA	NA	NA	NA	NA	NA	NA	NA	NA	NA	NA
					128	NA	NA	NA	NA	NA	NA	NA	NA	NA	NA	NA	NA	NA	NA	NA	NA	NA	NA	NA	NA	NA	NA	NA	NA	NA	NA	NA	NA	NA	NA	8.128	282.067	NA	NA	NA	NA	NA	NA	NA	NA	NA	NA	NA	NA
					129	NA	NA	NA	NA	NA	NA	NA	NA	NA	NA	NA	NA	NA	NA	NA	NA	NA	NA	NA	NA	NA	NA	NA	NA	NA	NA	NA	NA	NA	NA	8.192	284.723	NA	NA	NA	NA	NA	NA	NA	NA	NA	NA	NA	NA
					130	NA	NA	NA	NA	NA	NA	NA	NA	NA	NA	NA	NA	NA	NA	NA	NA	NA	NA	NA	NA	NA	NA	NA	NA	NA	NA	NA	NA	NA	NA	8.256	275.355	NA	NA	NA	NA	NA	NA	NA	NA	NA	NA	NA	NA
					131	NA	NA	NA	NA	NA	NA	NA	NA	NA	NA	NA	NA	NA	NA	NA	NA	NA	NA	NA	NA	NA	NA	NA	NA	NA	NA	NA	NA	NA	NA	8.32	277.089	NA	NA	NA	NA	NA	NA	NA	NA	NA	NA	NA	NA
					132	NA	NA	NA	NA	NA	NA	NA	NA	NA	NA	NA	NA	NA	NA	NA	NA	NA	NA	NA	NA	NA	NA	NA	NA	NA	NA	NA	NA	NA	NA	8.384	277.422	NA	NA	NA	NA	NA	NA	NA	NA	NA	NA	NA	NA
					133	NA	NA	NA	NA	NA	NA	NA	NA	NA	NA	NA	NA	NA	NA	NA	NA	NA	NA	NA	NA	NA	NA	NA	NA	NA	NA	NA	NA	NA	NA	8.448	283.032	NA	NA	NA	NA	NA	NA	NA	NA	NA	NA	NA	NA
					134	NA	NA	NA	NA	NA	NA	NA	NA	NA	NA	NA	NA	NA	NA	NA	NA	NA	NA	NA	NA	NA	NA	NA	NA	NA	NA	NA	NA	NA	NA	8.512	291.857	NA	NA	NA	NA	NA	NA	NA	NA	NA	NA	NA	NA
					135	NA	NA	NA	NA	NA	NA	NA	NA	NA	NA	NA	NA	NA	NA	NA	NA	NA	NA	NA	NA	NA	NA	NA	NA	NA	NA	NA	NA	NA	NA	8.576	288.782	NA	NA	NA	NA	NA	NA	NA	NA	NA	NA	NA	NA
					136	NA	NA	NA	NA	NA	NA	NA	NA	NA	NA	NA	NA	NA	NA	NA	NA	NA	NA	NA	NA	NA	NA	NA	NA	NA	NA	NA	NA	NA	NA	8.64	294.387	NA	NA	NA	NA	NA	NA	NA	NA	NA	NA	NA	NA
					137	NA	NA	NA	NA	NA	NA	NA	NA	NA	NA	NA	NA	NA	NA	NA	NA	NA	NA	NA	NA	NA	NA	NA	NA	NA	NA	NA	NA	NA	NA	8.704	287.708	NA	NA	NA	NA	NA	NA	NA	NA	NA	NA	NA	NA
					138	NA	NA	NA	NA	NA	NA	NA	NA	NA	NA	NA	NA	NA	NA	NA	NA	NA	NA	NA	NA	NA	NA	NA	NA	NA	NA	NA	NA	NA	NA	8.768	265.494	NA	NA	NA	NA	NA	NA	NA	NA	NA	NA	NA	NA
					139	NA	NA	NA	NA	NA	NA	NA	NA	NA	NA	NA	NA	NA	NA	NA	NA	NA	NA	NA	NA	NA	NA	NA	NA	NA	NA	NA	NA	NA	NA	8.832	272.962	NA	NA	NA	NA	NA	NA	NA	NA	NA	NA	NA	NA
					140	NA	NA	NA	NA	NA	NA	NA	NA	NA	NA	NA	NA	NA	NA	NA	NA	NA	NA	NA	NA	NA	NA	NA	NA	NA	NA	NA	NA	NA	NA	8.896	296.21	NA	NA	NA	NA	NA	NA	NA	NA	NA	NA	NA	NA
					141	NA	NA	NA	NA	NA	NA	NA	NA	NA	NA	NA	NA	NA	NA	NA	NA	NA	NA	NA	NA	NA	NA	NA	NA	NA	NA	NA	NA	NA	NA	8.96	299.973	NA	NA	NA	NA	NA	NA	NA	NA	NA	NA	NA	NA
					142	NA	NA	NA	NA	NA	NA	NA	NA	NA	NA	NA	NA	NA	NA	NA	NA	NA	NA	NA	NA	NA	NA	NA	NA	NA	NA	NA	NA	NA	NA	9.024	311.26	NA	NA	NA	NA	NA	NA	NA	NA	NA	NA	NA	NA
					143	NA	NA	NA	NA	NA	NA	NA	NA	NA	NA	NA	NA	NA	NA	NA	NA	NA	NA	NA	NA	NA	NA	NA	NA	NA	NA	NA	NA	NA	NA	9.088	304.037	NA	NA	NA	NA	NA	NA	NA	NA	NA	NA	NA	NA
					144	NA	NA	NA	NA	NA	NA	NA	NA	NA	NA	NA	NA	NA	NA	NA	NA	NA	NA	NA	NA	NA	NA	NA	NA	NA	NA	NA	NA	NA	NA	9.152	300.731	NA	NA	NA	NA	NA	NA	NA	NA	NA	NA	NA	NA
					145	NA	NA	NA	NA	NA	NA	NA	NA	NA	NA	NA	NA	NA	NA	NA	NA	NA	NA	NA	NA	NA	NA	NA	NA	NA	NA	NA	NA	NA	NA	9.216	295.696	NA	NA	NA	NA	NA	NA	NA	NA	NA	NA	NA	NA
					146	NA	NA	NA	NA	NA	NA	NA	NA	NA	NA	NA	NA	NA	NA	NA	NA	NA	NA	NA	NA	NA	NA	NA	NA	NA	NA	NA	NA	NA	NA	9.28	264.29	NA	NA	NA	NA	NA	NA	NA	NA	NA	NA	NA	NA
					147	NA	NA	NA	NA	NA	NA	NA	NA	NA	NA	NA	NA	NA	NA	NA	NA	NA	NA	NA	NA	NA	NA	NA	NA	NA	NA	NA	NA	NA	NA	9.344	255.51	NA	NA	NA	NA	NA	NA	NA	NA	NA	NA	NA	NA
					148	NA	NA	NA	NA	NA	NA	NA	NA	NA	NA	NA	NA	NA	NA	NA	NA	NA	NA	NA	NA	NA	NA	NA	NA	NA	NA	NA	NA	NA	NA	9.408	248.36	NA	NA	NA	NA	NA	NA	NA	NA	NA	NA	NA	NA
					149	NA	NA	NA	NA	NA	NA	NA	NA	NA	NA	NA	NA	NA	NA	NA	NA	NA	NA	NA	NA	NA	NA	NA	NA	NA	NA	NA	NA	NA	NA	9.472	250.32	NA	NA	NA	NA	NA	NA	NA	NA	NA	NA	NA	NA
					150	NA	NA	NA	NA	NA	NA	NA	NA	NA	NA	NA	NA	NA	NA	NA	NA	NA	NA	NA	NA	NA	NA	NA	NA	NA	NA	NA	NA	NA	NA	9.536	254.32	NA	NA	NA	NA	NA	NA	NA	NA	NA	NA	NA	NA
					151	NA	NA	NA	NA	NA	NA	NA	NA	NA	NA	NA	NA	NA	NA	NA	NA	NA	NA	NA	NA	NA	NA	NA	NA	NA	NA	NA	NA	NA	NA	9.6	267.45	NA	NA	NA	NA	NA	NA	NA	NA	NA	NA	NA	NA
					152	NA	NA	NA	NA	NA	NA	NA	NA	NA	NA	NA	NA	NA	NA	NA	NA	NA	NA	NA	NA	NA	NA	NA	NA	NA	NA	NA	NA	NA	NA	9.664	278.3	NA	NA	NA	NA	NA	NA	NA	NA	NA	NA	NA	NA
					153	NA	NA	NA	NA	NA	NA	NA	NA	NA	NA	NA	NA	NA	NA	NA	NA	NA	NA	NA	NA	NA	NA	NA	NA	NA	NA	NA	NA	NA	NA	9.728	281.66	NA	NA	NA	NA	NA	NA	NA	NA	NA	NA	NA	NA
					154	NA	NA	NA	NA	NA	NA	NA	NA	NA	NA	NA	NA	NA	NA	NA	NA	NA	NA	NA	NA	NA	NA	NA	NA	NA	NA	NA	NA	NA	NA	9.792	280.34	NA	NA	NA	NA	NA	NA	NA	NA	NA	NA	NA	NA
					155	NA	NA	NA	NA	NA	NA	NA	NA	NA	NA	NA	NA	NA	NA	NA	NA	NA	NA	NA	NA	NA	NA	NA	NA	NA	NA	NA	NA	NA	NA	9.856	288.3	NA	NA	NA	NA	NA	NA	NA	NA	NA	NA	NA	NA
					156	NA	NA	NA	NA	NA	NA	NA	NA	NA	NA	NA	NA	NA	NA	NA	NA	NA	NA	NA	NA	NA	NA	NA	NA	NA	NA	NA	NA	NA	NA	9.92	280.87	NA	NA	NA	NA	NA	NA	NA	NA	NA	NA	NA	NA
					157	NA	NA	NA	NA	NA	NA	NA	NA	NA	NA	NA	NA	NA	NA	NA	NA	NA	NA	NA	NA	NA	NA	NA	NA	NA	NA	NA	NA	NA	NA	9.984	253.27	NA	NA	NA	NA	NA	NA	NA	NA	NA	NA	NA	NA
																														NA	NA	NA	NA	NA	NA	10.048	238.87
																														NA	NA	NA	NA	NA	NA	10.112	252.77
																														NA	NA	NA	NA	NA	NA	10.176	267.62
																														NA	NA	NA	NA	NA	NA	10.24	265.85
																														NA	NA	NA	NA	NA	NA	10.304	255.87
																														NA	NA	NA	NA	NA	NA	10.368	251.51
																														NA	NA	NA	NA	NA	NA	10.432	255.15
																														NA	NA	NA	NA	NA	NA	10.496	245.21
																														NA	NA	NA	NA	NA	NA	10.56	229.72
																														NA	NA	NA	NA	NA	NA	10.624	234.47
																														NA	NA	NA	NA	NA	NA	10.688	245.13
																														NA	NA	NA	NA	NA	NA	10.752	229.57
																														NA	NA	NA	NA	NA	NA	10.816	216.87
																														NA	NA	NA	NA	NA	NA	10.88	231.6
																														NA	NA	NA	NA	NA	NA	10.944	252.8
																														NA	NA	NA	NA	NA	NA	11.008	253.893
																														NA	NA	NA	NA	NA	NA	11.072	241.21
																														NA	NA	NA	NA	NA	NA	11.136	245.637
																														NA	NA	NA	NA	NA	NA	11.2	237.975
																														NA	NA	NA	NA	NA	NA	11.264	246.72
																														NA	NA	NA	NA	NA	NA	11.328	250.095
																														NA	NA	NA	NA	NA	NA	11.392	246.169
																														NA	NA	NA	NA	NA	NA	11.456	249.922
																														NA	NA	NA	NA	NA	NA	11.52	246.912
																														NA	NA	NA	NA	NA	NA	11.584	250.48
																														NA	NA	NA	NA	NA	NA	11.648	248.962
																														NA	NA	NA	NA	NA	NA	11.712	262.57
																														NA	NA	NA	NA	NA	NA	11.776	265.157
																														NA	NA	NA	NA	NA	NA	11.84	245.318
																														NA	NA	NA	NA	NA	NA	11.904	232.182
																														NA	NA	NA	NA	NA	NA	11.968	239.159
																														NA	NA	NA	NA	NA	NA	12.032	251.415
																														NA	NA	NA	NA	NA	NA	12.096	258
																														NA	NA	NA	NA	NA	NA	12.16	255.078
																														NA	NA	NA	NA	NA	NA	12.224	264.952
																														NA	NA	NA	NA	NA	NA	12.288	254.164
																														NA	NA	NA	NA	NA	NA	12.352	230.769
																														NA	NA	NA	NA	NA	NA	12.416	221.259
																														NA	NA	NA	NA	NA	NA	12.48	237.612
																														NA	NA	NA	NA	NA	NA	12.544	251.256
																														NA	NA	NA	NA	NA	NA	12.608	260.633
																														NA	NA	NA	NA	NA	NA	12.672	247.538
[truncated: 308 more columns]

## Sheet: Mex67
Mex67-GFP						1								2								3								4								5								6
						Ic				Ir		Ibg		Ic				Ir		Ibg		Ic				Ir		Ibg		Ic				Ir		Ibg		Ic				Ir		Ibg		Ic
							363.734				376.71		176.715		266.642				272.066		150.766		260.648				372.515		167.276		399.364				297.646		153.695		271.011				350.165		159.641		274.689
							187.019								115.875								93.3717								245.668								111.371								106.273
	average	median	SEM	n		Relative accumulation (RA)					199.995			Relative accumulation (RA)					121.299			Relative accumulation (RA)					205.239			Relative accumulation (RA)					143.951			Relative accumulation (RA)					190.524			Relative accumulation (RA)
RA:	1.00606	0.955286	0.101816	25		0.935116								0.955286								0.454942								1.70661								0.58455								0.505187
	p-value
	0.339575
						141113_VisSt_Mex67_01_04Crop_1.tifGFP_x_lc	141113_VisSt_Mex67_01_04Crop_1.tifGFP_y_lc	141113_VisSt_Mex67_01_04Crop_1.tifmCh_x_cap	141113_VisSt_Mex67_01_04Crop_1.tifmCh_y_cap	141113_VisSt_Mex67_01_04Crop_1.tifGFP_x_lr	141113_VisSt_Mex67_01_04Crop_1.tifGFP_y_lr	141113_VisSt_Mex67_01_04Crop_1.tifGFP_x_bg	141113_VisSt_Mex67_01_04Crop_1.tifGFP_y_bg	141113_VisSt_Mex67_01_05Crop_1.tifGFP_x_lc	141113_VisSt_Mex67_01_05Crop_1.tifGFP_y_lc	141113_VisSt_Mex67_01_05Crop_1.tifmCh_x_cap	141113_VisSt_Mex67_01_05Crop_1.tifmCh_y_cap	141113_VisSt_Mex67_01_05Crop_1.tifGFP_x_lr	141113_VisSt_Mex67_01_05Crop_1.tifGFP_y_lr	141113_VisSt_Mex67_01_05Crop_1.tifGFP_x_bg	141113_VisSt_Mex67_01_05Crop_1.tifGFP_y_bg	141113_VisSt_Mex67_01_05Crop_2.tifGFP_x_lc	141113_VisSt_Mex67_01_05Crop_2.tifGFP_y_lc	141113_VisSt_Mex67_01_05Crop_2.tifmCh_x_cap	141113_VisSt_Mex67_01_05Crop_2.tifmCh_y_cap	141113_VisSt_Mex67_01_05Crop_2.tifGFP_x_lr	141113_VisSt_Mex67_01_05Crop_2.tifGFP_y_lr	141113_VisSt_Mex67_01_05Crop_2.tifGFP_x_bg	141113_VisSt_Mex67_01_05Crop_2.tifGFP_y_bg	141113_VisSt_Mex67_01_06Crop_1.tifGFP_x_lc	141113_VisSt_Mex67_01_06Crop_1.tifGFP_y_lc	141113_VisSt_Mex67_01_06Crop_1.tifmCh_x_cap	141113_VisSt_Mex67_01_06Crop_1.tifmCh_y_cap	141113_VisSt_Mex67_01_06Crop_1.tifGFP_x_lr	141113_VisSt_Mex67_01_06Crop_1.tifGFP_y_lr	141113_VisSt_Mex67_01_06Crop_1.tifGFP_x_bg	141113_VisSt_Mex67_01_06Crop_1.tifGFP_y_bg	141113_VisSt_Mex67_01_12Crop_1.tifGFP_x_lc	141113_VisSt_Mex67_01_12Crop_1.tifGFP_y_lc	141113_VisSt_Mex67_01_12Crop_1.tifmCh_x_cap	141113_VisSt_Mex67_01_12Crop_1.tifmCh_y_cap	141113_VisSt_Mex67_01_12Crop_1.tifGFP_x_lr	141113_VisSt_Mex67_01_12Crop_1.tifGFP_y_lr	141113_VisSt_Mex67_01_12Crop_1.tifGFP_x_bg	141113_VisSt_Mex67_01_12Crop_1.tifGFP_y_bg	141113_VisSt_Mex67_02_02Crop_1.tifGFP_x_lc	141113_VisSt_Mex67_02_02Crop_1.tifGFP_y_lc	141113_VisSt_Mex67_02_02Crop_1.tifmCh_x_cap	141113_VisSt_Mex67_02_02Crop_1.tifmCh_y_cap
					1	0	469	0	430	0	600	0	200	0	203	0	649	0	197	0	150	0	183	0	314	0	209	0	202	0	326	0	248	0	245	0	138	0	283	0	1014	0	294	0	184	0	247	0	321
					2	0.064	421.277	0.064	616.386	0.064	552.052	0.064	200.645	0.064	222.08	0.064	875.762	0.064	208.28	0.064	147.8	0.064	218.723	0.064	417.968	0.064	206.56	0.064	211.912	0.064	298.491	0.064	241.278	0.064	234.22	0.064	134.569	0.064	277.332	0.064	747.691	0.064	299.931	0.064	170.035	0.064	239.218	0.064	537.806
					3	0.128	380.033	0.128	759.144	0.128	502.148	0.128	197.317	0.128	226	0.128	1026.45	0.128	225.397	0.128	142.48	0.128	248.124	0.128	547.948	0.128	200.56	0.128	181.966	0.128	282.986	0.128	234.816	0.128	218.796	0.128	128.532	0.128	267.771	0.128	562.083	0.128	270.442	0.128	165.819	0.128	235.512	0.128	841.46
					4	0.192	321.859	0.192	834.102	0.192	434.693	0.192	181.206	0.192	236.52	0.192	1091.14	0.192	244.131	0.192	131.04	0.192	216.985	0.192	623.963	0.192	234.88	0.192	171.618	0.192	287.471	0.192	222.085	0.192	224.226	0.192	144.737	0.192	257.766	0.192	501.199	0.192	256.125	0.192	173.137	0.192	250.626	0.192	1105.12
					5	0.256	289.085	0.256	920.312	0.256	386.464	0.256	178.841	0.256	259.16	0.256	1129.35	0.256	254.516	0.256	128.52	0.256	186.976	0.256	727.838	0.256	297.4	0.256	158.266	0.256	321.876	0.256	209.836	0.256	237.852	0.256	154.705	0.256	274.106	0.256	579.765	0.256	269.867	0.256	170.457	0.256	280.924	0.256	1269.01
					6	0.32	263.357	0.32	1003.31	0.32	338.373	0.32	180.143	0.32	285	0.32	1261.49	0.32	264.489	0.32	130	0.32	189.445	0.32	872.851	0.32	345	0.32	170.073	0.32	350.818	0.32	213.924	0.32	254.604	0.32	162.918	0.32	304.552	0.32	751.404	0.32	279.04	0.32	147.429	0.32	297.582	0.32	1342.67
					7	0.384	229.554	0.384	1041.51	0.384	329.924	0.384	182.881	0.384	298.04	0.384	1383.71	0.384	267.646	0.384	142.8	0.384	213.291	0.384	950.428	0.384	376.32	0.384	181.999	0.384	390.812	0.384	212.779	0.384	261.102	0.384	142.374	0.384	288.583	0.384	996.398	0.384	276.865	0.384	145.635	0.384	299.354	0.384	1415.53
					8	0.448	234.661	0.448	1059.41	0.448	334.991	0.448	183.543	0.448	316.52	0.448	1395.32	0.448	274.351	0.448	154.8	0.448	229.584	0.448	1017.61	0.448	422.16	0.448	169.778	0.448	370.691	0.448	200.94	0.448	255.806	0.448	142.089	0.448	264.918	0.448	1230.92	0.448	291.342	0.448	157.48	0.448	304.293	0.448	1497.86
					9	0.512	271.861	0.512	1104.47	0.512	320.831	0.512	186.907	0.512	337.52	0.512	1387.65	0.512	311.975	0.512	169.56	0.512	213.137	0.512	1090.25	0.512	429.04	0.512	173.16	0.512	363.498	0.512	204.945	0.512	264.532	0.512	151.84	0.512	252.3	0.512	1452.95	0.512	310.181	0.512	148.058	0.512	310.097	0.512	1596.79
					10	0.576	334.48	0.576	1141.53	0.576	309.639	0.576	175.833	0.576	383.24	0.576	1395	0.576	333.477	0.576	172.04	0.576	231.216	0.576	1198.08	0.576	389.04	0.576	168.169	0.576	388.308	0.576	214.889	0.576	264.675	0.576	151.691	0.576	258.23	0.576	1689.62	0.576	309.567	0.576	139.552	0.576	310.349	0.576	1718.55
					11	0.64	416.871	0.64	1165.49	0.64	315.817	0.64	175.026	0.64	428	0.64	1406.45	0.64	292.81	0.64	169	0.64	250.904	0.64	1304.52	0.64	329	0.64	164.241	0.64	379.832	0.64	221.235	0.64	223.387	0.64	155.395	0.64	254.753	0.64	1986.09	0.64	307.05	0.64	138.326	0.64	309.37	0.64	1819.24
					12	0.704	447.307	0.704	1187.12	0.704	319.134	0.704	182.286	0.704	412.88	0.704	1437.82	0.704	284.824	0.704	156.64	0.704	240.46	0.704	1395.59	0.704	290.764	0.704	176.757	0.704	403.871	0.704	203.761	0.704	206.019	0.704	160.602	0.704	241.228	0.704	2300.3	0.704	314.055	0.704	144.44	0.704	303.228	0.704	1852.93
					13	0.768	429.741	0.768	1224.01	0.768	321.727	0.768	181.24	0.768	416.6	0.768	1464.21	0.768	293.005	0.768	157.96	0.768	226.429	0.768	1434.53	0.768	262.358	0.768	195.288	0.768	482.071	0.768	206.609	0.768	213.044	0.768	161.951	0.768	255.517	0.768	2500.95	0.768	316.719	0.768	151.207	0.768	286.189	0.768	1915.39
					14	0.832	390.745	0.832	1338.4	0.832	355.794	0.832	186.311	0.832	441.52	0.832	1459.58	0.832	314.083	0.832	160.92	0.832	237.205	0.832	1451.36	0.832	295.005	0.832	178.093	0.832	554.481	0.832	192.588	0.832	242.852	0.832	166.809	0.832	273.027	0.832	2538.75	0.832	310.113	0.832	157.97	0.832	262.506	0.832	1860.63
					15	0.896	444.515	0.896	1451.12	0.896	347.768	0.896	183.391	0.896	424.92	0.896	1442.47	0.896	333.225	0.896	158.24	0.896	260.905	0.896	1409.76	0.896	351.396	0.896	158.31	0.896	584.147	0.896	188.663	0.896	270.022	0.896	171.798	0.896	276.744	0.896	2634.96	0.896	313.728	0.896	160.09	0.896	263.27	0.896	1657.51
					16	0.96	544.678	0.96	1523.14	0.96	295.646	0.96	180.41	0.96	363	0.96	1391.37	0.96	331.417	0.96	160	0.96	264.915	0.96	1243.84	0.96	379.089	0.96	166.106	0.96	570.071	0.96	203.543	0.96	284.394	0.96	164.281	0.96	265.777	0.96	2741.1	0.96	323.632	0.96	154.618	0.96	274.091	0.96	1530.16
					17	1.024	610.323	1.024	1566.47	1.024	255.629	1.024	188.51	1.024	333	1.024	1309.41	1.024	350.812	1.024	160.92	1.024	251.961	1.024	1129.48	1.024	390.404	1.024	175.66	1.024	468.845	1.024	213.24	1.024	272.428	1.024	169.737	1.024	249.438	1.024	2696.01	1.024	330.073	1.024	151.536	1.024	234.956	1.024	1381.89
					18	1.088	599.293	1.088	1577.31	1.088	262.753	1.088	201.647	1.088	285	1.088	1292.38	1.088	384.074	1.088	158.84	1.088	231.023	1.088	1069.32	1.088	377.82	1.088	160.967	1.088	454.534	1.088	247.096	1.088	254.658	1.088	167.693	1.088	243.364	1.088	2536.53	1.088	339.967	1.088	160.794	1.088	201.158	1.088	1126.03
					19	1.152	493.251	1.152	1600.17	1.152	284.074	1.152	213.308	1.152	253	1.152	1257.18	1.152	387.9	1.152	150.52	1.152	264.154	1.152	1050.68	1.152	367.12	1.152	175.229	1.152	449.957	1.152	266.912	1.152	263.868	1.152	146.374	1.152	243.629	1.152	2245.29	1.152	337.3	1.152	160.712	1.152	206.407	1.152	932.924
					20	1.216	340.013	1.216	1671.48	1.216	297.526	1.216	190.683	1.216	250	1.216	1185.16	1.216	393.4	1.216	146.28	1.216	288.527	1.216	984.72	1.216	379.12	1.216	187.071	1.216	438.665	1.216	259.206	1.216	303.227	1.216	163.63	1.216	240.37	1.216	1770.13	1.216	349.526	1.216	157.151	1.216	219.855	1.216	793.25
					21	1.28	268.274	1.28	1621.98	1.28	319.448	1.28	177.63	1.28	257	1.28	980.457	1.28	404.2	1.28	151	1.28	283.403	1.28	874.48	1.28	382.02	1.28	177.043	1.28	455.111	1.28	265.847	1.28	331.261	1.28	160.754	1.28	230.075	1.28	1206.69	1.28	368.133	1.28	155.345	1.28	237.351	1.28	644.496
					22	1.344	254.176	1.344	1357.31	1.344	334.736	1.344	171.07	1.344	277	1.344	710.366	1.344	366.7	1.344	149.601	1.344	271.264	1.344	805.68	1.344	364.422	1.344	180.08	1.344	469.903	1.344	246.456	1.344	368.45	1.344	149.36	1.344	218.475	1.344	675.745	1.344	369.95	1.344	160.233	1.344	237.031	1.344	452.66
					23	1.408	233.705	1.408	1044.46	1.408	306.964	1.408	166.185	1.408	312	1.408	477.159	1.408	318.214	1.408	141.571	1.408	271.168	1.408	705.965	1.408	373.793	1.408	161.82	1.408	470.046	1.408	201.695	1.408	386.538	1.408	138.958	1.408	224.876	NA	NA	1.408	349.717	1.408	181.002	1.408	257.291	1.408	276.877
					24	1.472	238.183	1.472	786.216	1.472	318.903	1.472	166.569	1.472	273	1.472	279.801	1.472	284.424	1.472	131.574	1.472	261.83	1.472	584.211	1.472	377.975	1.472	158.472	1.472	465.903	1.472	77.227	1.472	320.93	1.472	144.865	1.472	260.872	NA	NA	1.472	357.178	1.472	190.006	1.472	310.192	NA	NA
					25	1.536	229.243	1.536	562.706	1.536	330.949	1.536	167.442	1.536	231.443	1.536	167.586	1.536	265.338	1.536	126.947	1.536	270.86	1.536	474.803	1.536	348.086	1.536	171.603	1.536	431.793	1.536	67.82	1.536	273.984	1.536	146.756	1.536	288.746	NA	NA	1.536	382.143	1.536	178.56	1.536	356.915	NA	NA
					26	1.6	211.433	1.6	372.693	1.6	327.526	1.6	173.365	1.6	207.997	NA	NA	1.6	256.022	1.6	140.612	1.6	318.369	1.6	427.673	1.6	337.677	1.6	188.85	1.6	375.213	1.6	63.846	1.6	261.789	1.6	141.461	1.6	303.709	NA	NA	1.6	408.591	1.6	158.027	1.6	350.479	NA	NA
					27	1.664	223.35	NA	NA	1.664	339.149	1.664	188.141	1.664	200.822	NA	NA	1.664	271.654	1.664	158.717	1.664	374.149	1.664	382.268	1.664	368.715	1.664	195.883	1.664	322.563	1.664	68.068	1.664	278.184	1.664	151.867	1.664	331.485	NA	NA	1.664	423.673	1.664	145.641	1.664	310.118	NA	NA
					28	1.728	303	NA	NA	1.728	355.721	1.728	198.992	1.728	224.987	NA	NA	1.728	287.421	1.728	162.755	1.728	368.48	1.728	281.153	1.728	400.882	1.728	177.408	1.728	282.203	1.728	73.374	1.728	303.463	1.728	154.568	1.728	351.86	NA	NA	1.728	438.43	1.728	149.365	1.728	274.486	NA	NA
					29	1.792	404.35	NA	NA	1.792	333.661	1.792	207.235	1.792	250.479	NA	NA	1.792	285.349	1.792	142.505	1.792	355.02	1.792	214.089	1.792	388.214	1.792	152.239	1.792	266.968	1.792	78.462	1.792	310.417	1.792	154.967	1.792	326.835	NA	NA	1.792	425.55	1.792	161.206	1.792	265.14	NA	NA
					30	1.856	484.85	NA	NA	1.856	321.136	1.856	185.776	1.856	275.264	NA	NA	1.856	271.337	1.856	138.694	1.856	345.1	NA	NA	1.856	382.539	1.856	147.33	1.856	273.782	1.856	77.093	1.856	306.487	1.856	159.22	1.856	321.006	NA	NA	1.856	408.781	1.856	160.587	1.856	261.943	NA	NA
					31	1.92	491.5	NA	NA	1.92	313.103	1.92	172.361	1.92	305.509	NA	NA	1.92	247.36	1.92	146.043	1.92	346.76	NA	NA	1.92	378.076	1.92	174.201	NA	NA	1.92	79.285	1.92	293.043	1.92	160.149	NA	NA	NA	NA	1.92	350.268	1.92	163.042	1.92	261.827	NA	NA
					32	1.984	439.25	NA	NA	1.984	307.853	1.984	172.666	1.984	285.162	NA	NA	1.984	247.219	1.984	152.047	1.984	375.7	NA	NA	1.984	404.75	1.984	188.139	NA	NA	1.984	81.985	1.984	280.332	1.984	153.747	NA	NA	NA	NA	1.984	335.413	1.984	172.036	1.984	275.319	NA	NA
					33	2.048	387.4	NA	NA	2.048	325.56	2.048	166.251	2.048	268.314	NA	NA	2.048	235.619	2.048	165.937	2.048	379	NA	NA	2.048	427.792	2.048	187.348	NA	NA	2.048	87.38	2.048	289.625	2.048	158.622	NA	NA	NA	NA	2.048	369.635	2.048	174.424	2.048	294.359	NA	NA
					34	2.112	342.55	NA	NA	2.112	330.49	2.112	160.557	2.112	249.228	NA	NA	2.112	222.797	2.112	163.307	2.112	335.48	NA	NA	2.112	432.681	2.112	163.521	NA	NA	2.112	89.42	2.112	304.194	2.112	157.318	NA	NA	NA	NA	2.112	369.083	2.112	182.143	2.112	311.004	NA	NA
					35	2.176	326.675	NA	NA	2.176	319.08	2.176	163.736	2.176	216.999	NA	NA	2.176	222.576	2.176	150.564	2.176	324.72	NA	NA	2.176	425.499	2.176	147.094	NA	NA	2.176	84.055	2.176	318.715	2.176	143.409	NA	NA	NA	NA	2.176	371.625	2.176	180.547	NA	NA	NA	NA
					36	2.24	341.129	NA	NA	2.24	316.51	2.24	197.225	2.24	178.99	NA	NA	2.24	239.391	2.24	151.371	2.24	315.705	NA	NA	2.24	399.819	2.24	148.68	NA	NA	2.24	88.915	2.24	330	2.24	153.346	NA	NA	NA	NA	2.24	363.413	2.24	159.33	NA	NA	NA	NA
					37	2.304	347.174	NA	NA	2.304	317.67	2.304	199.714	2.304	158.419	NA	NA	2.304	250.37	2.304	149.887	2.304	286.417	NA	NA	2.304	458.353	2.304	157.329	NA	NA	2.304	97.726	2.304	328.152	2.304	152.379	NA	NA	NA	NA	2.304	351.53	2.304	144.634	NA	NA	NA	NA
					38	NA	NA	NA	NA	2.368	301.365	2.368	174.892	2.368	156.207	NA	NA	2.368	246.805	2.368	143.104	2.368	261.133	NA	NA	2.368	481.784	2.368	172.804	NA	NA	2.368	97.126	2.368	339.425	2.368	142.098	NA	NA	NA	NA	2.368	392.548	2.368	139.127	NA	NA	NA	NA
					39	NA	NA	NA	NA	2.432	282.025	2.432	156.882	2.432	161.99	NA	NA	2.432	253.594	2.432	133.596	2.432	231.208	NA	NA	2.432	431.512	2.432	179.764	NA	NA	2.432	93.381	2.432	367.498	2.432	150.802	NA	NA	NA	NA	2.432	399.975	2.432	136.757	NA	NA	NA	NA
					40	NA	NA	NA	NA	2.496	283.808	2.496	150.889	2.496	168.034	NA	NA	2.496	273.825	2.496	137.168	2.496	215.139	NA	NA	2.496	404.342	2.496	160.418	NA	NA	2.496	98.655	2.496	381.597	2.496	157.849	NA	NA	NA	NA	2.496	382.65	2.496	146.548	NA	NA	NA	NA
					41	NA	NA	NA	NA	2.56	323.224	2.56	152.875	2.56	177.825	NA	NA	2.56	285.4	2.56	151.015	2.56	215.743	NA	NA	2.56	377.324	2.56	159.12	NA	NA	2.56	100.454	2.56	362.144	2.56	158.271	NA	NA	NA	NA	2.56	377.83	2.56	153.426	NA	NA	NA	NA
					42	NA	NA	NA	NA	2.624	390.194	2.624	164.964	2.624	195.259	NA	NA	2.624	283.556	2.624	164.219	2.624	218.406	NA	NA	2.624	375.642	2.624	160.067	NA	NA	2.624	91.745	2.624	332.913	2.624	154.204	NA	NA	NA	NA	2.624	379.61	2.624	156.212	NA	NA	NA	NA
					43	NA	NA	NA	NA	2.688	407.079	2.688	154.911	2.688	218.879	NA	NA	2.688	282.296	2.688	157.281	2.688	202.176	NA	NA	2.688	425.891	2.688	140.694	NA	NA	2.688	83.676	2.688	314.722	2.688	150.983	NA	NA	NA	NA	2.688	371.047	2.688	160.844	NA	NA	NA	NA
					44	NA	NA	NA	NA	2.752	416.718	2.752	153.381	2.752	226.881	NA	NA	2.752	278.574	2.752	154.838	2.752	194.75	NA	NA	2.752	454.387	2.752	144.807	NA	NA	2.752	82.959	2.752	297.404	2.752	154.799	NA	NA	NA	NA	2.752	348.222	2.752	158.57	NA	NA	NA	NA
					45	NA	NA	NA	NA	2.816	464.218	2.816	163.197	2.816	226.548	NA	NA	2.816	258.627	2.816	162.692	2.816	192.25	NA	NA	2.816	462.438	2.816	172.532	NA	NA	2.816	82.923	2.816	276.938	2.816	158.494	NA	NA	NA	NA	2.816	336.936	2.816	162.937	NA	NA	NA	NA
					46	NA	NA	NA	NA	2.88	500.974	2.88	173.271	2.88	226.707	NA	NA	2.88	245.168	2.88	159.182	2.88	189.5	NA	NA	2.88	462.191	2.88	179.129	NA	NA	2.88	74.128	2.88	278.325	2.88	160.645	NA	NA	NA	NA	2.88	346.267	2.88	156.802	NA	NA	NA	NA
					47	NA	NA	NA	NA	2.944	533.514	2.944	183.358	2.944	226.216	NA	NA	2.944	247.339	2.944	160.061	2.944	199.75	NA	NA	2.944	449.346	2.944	158.86	NA	NA	2.944	68.82	2.944	306.536	2.944	161.765	NA	NA	NA	NA	2.944	328.366	2.944	153.86	NA	NA	NA	NA
					48	NA	NA	NA	NA	3.008	586.694	3.008	186.249	NA	NA	NA	NA	3.008	259.228	3.008	166.041	NA	NA	NA	NA	NA	NA	3.008	152.717	NA	NA	3.008	69.29	3.008	329.023	3.008	159.018	NA	NA	NA	NA	3.008	324.483	3.008	166.609	NA	NA	NA	NA
					49	NA	NA	NA	NA	3.072	667.151	3.072	174.45	NA	NA	NA	NA	3.072	274.114	3.072	163.824	NA	NA	NA	NA	NA	NA	3.072	160.351	NA	NA	3.072	68.772	3.072	323.585	3.072	156.12	NA	NA	NA	NA	3.072	385.46	3.072	174.246	NA	NA	NA	NA
					50	NA	NA	NA	NA	3.136	720.322	3.136	153.394	NA	NA	NA	NA	3.136	293.315	3.136	161.432	NA	NA	NA	NA	NA	NA	3.136	160.368	NA	NA	3.136	74.269	3.136	322.583	3.136	148.714	NA	NA	NA	NA	3.136	476.679	3.136	172.372	NA	NA	NA	NA
					51	NA	NA	NA	NA	3.2	651.495	3.2	151.872	NA	NA	NA	NA	3.2	351.234	3.2	150.691	NA	NA	NA	NA	NA	NA	3.2	151.771	NA	NA	3.2	79.781	3.2	338.205	3.2	144.041	NA	NA	NA	NA	3.2	539.067	3.2	169.166	NA	NA	NA	NA
					52	NA	NA	NA	NA	NA	NA	3.264	164.533	NA	NA	NA	NA	3.264	429	3.264	147.45	NA	NA	NA	NA	NA	NA	3.264	144.048	NA	NA	3.264	70.812	3.264	353.902	3.264	144.312	NA	NA	NA	NA	3.264	496.394	3.264	168.083	NA	NA	NA	NA
					53	NA	NA	NA	NA	NA	NA	3.328	180.896	NA	NA	NA	NA	3.328	404.817	3.328	142.008	NA	NA	NA	NA	NA	NA	3.328	140.792	NA	NA	3.328	62.622	3.328	362.266	3.328	152.661	NA	NA	NA	NA	3.328	442.446	3.328	168.292	NA	NA	NA	NA
					54	NA	NA	NA	NA	NA	NA	3.392	180.288	NA	NA	NA	NA	3.392	371.403	3.392	129.095	NA	NA	NA	NA	NA	NA	3.392	141.303	NA	NA	3.392	55.342	3.392	342.576	3.392	158.833	NA	NA	NA	NA	3.392	394.34	3.392	165.164	NA	NA	NA	NA
					55	NA	NA	NA	NA	NA	NA	3.456	168.818	NA	NA	NA	NA	3.456	338.474	3.456	137.777	NA	NA	NA	NA	NA	NA	3.456	157.15	NA	NA	3.456	54.213	3.456	315.384	3.456	159.58	NA	NA	NA	NA	3.456	345.887	3.456	144.831	NA	NA	NA	NA
					56	NA	NA	NA	NA	NA	NA	3.52	166.342	NA	NA	NA	NA	3.52	330.868	3.52	148.729	NA	NA	NA	NA	NA	NA	3.52	167.119	NA	NA	3.52	51.391	3.52	311.373	3.52	159	NA	NA	NA	NA	3.52	306.429	3.52	143.988	NA	NA	NA	NA
					57	NA	NA	NA	NA	NA	NA	3.584	170.733	NA	NA	NA	NA	3.584	313.895	3.584	151.953	NA	NA	NA	NA	NA	NA	3.584	170.594	NA	NA	3.584	44.905	3.584	365.389	3.584	165.39	NA	NA	NA	NA	3.584	286.071	3.584	147.101	NA	NA	NA	NA
					58	NA	NA	NA	NA	NA	NA	3.648	165.296	NA	NA	NA	NA	3.648	303.031	3.648	153.443	NA	NA	NA	NA	NA	NA	3.648	166.076	NA	NA	3.648	43.793	3.648	360.901	3.648	161.28	NA	NA	NA	NA	3.648	308.324	NA	NA	NA	NA	NA	NA
					59	NA	NA	NA	NA	NA	NA	3.712	149.644	NA	NA	NA	NA	3.712	273.309	3.712	148.18	NA	NA	NA	NA	NA	NA	3.712	163.152	NA	NA	3.712	48.576	3.712	343.217	3.712	157.021	NA	NA	NA	NA	3.712	330.9	NA	NA	NA	NA	NA	NA
					60	NA	NA	NA	NA	NA	NA	NA	NA	NA	NA	NA	NA	3.776	239.292	3.776	148.871	NA	NA	NA	NA	NA	NA	3.776	144.6	NA	NA	3.776	62.563	3.776	323.861	3.776	151.891	NA	NA	NA	NA	3.776	332.42	NA	NA	NA	NA	NA	NA
					61	NA	NA	NA	NA	NA	NA	NA	NA	NA	NA	NA	NA	3.84	240.331	3.84	149.823	NA	NA	NA	NA	NA	NA	3.84	146.532	NA	NA	3.84	67.51	3.84	297.569	3.84	152.11	NA	NA	NA	NA	3.84	324.46	NA	NA	NA	NA	NA	NA
					62	NA	NA	NA	NA	NA	NA	NA	NA	NA	NA	NA	NA	3.904	218.588	3.904	148.662	NA	NA	NA	NA	NA	NA	3.904	165.161	NA	NA	3.904	65.999	3.904	268.892	3.904	147.75	NA	NA	NA	NA	3.904	310.3	NA	NA	NA	NA	NA	NA
					63	NA	NA	NA	NA	NA	NA	NA	NA	NA	NA	NA	NA	3.968	198.01	3.968	149.957	NA	NA	NA	NA	NA	NA	3.968	169.453	NA	NA	3.968	66.94	3.968	255.204	NA	NA	NA	NA	NA	NA	3.968	296.46	NA	NA	NA	NA	NA	NA
					64	NA	NA	NA	NA	NA	NA	NA	NA	NA	NA	NA	NA	4.032	193.798	4.032	146.821	NA	NA	NA	NA	NA	NA	4.032	180.765	NA	NA	NA	NA	NA	NA	NA	NA	NA	NA	NA	NA	4.032	304.34	NA	NA	NA	NA	NA	NA
					65	NA	NA	NA	NA	NA	NA	NA	NA	NA	NA	NA	NA	4.096	173.037	4.096	141.182	NA	NA	NA	NA	NA	NA	4.096	169.964	NA	NA	NA	NA	NA	NA	NA	NA	NA	NA	NA	NA	NA	NA	NA	NA	NA	NA	NA	NA
					66	NA	NA	NA	NA	NA	NA	NA	NA	NA	NA	NA	NA	4.16	171.239	4.16	145.041	NA	NA	NA	NA	NA	NA	4.16	152.214	NA	NA	NA	NA	NA	NA	NA	NA	NA	NA	NA	NA	NA	NA	NA	NA	NA	NA	NA	NA
					67	NA	NA	NA	NA	NA	NA	NA	NA	NA	NA	NA	NA	4.224	180.736	4.224	143.699	NA	NA	NA	NA	NA	NA	4.224	149.761	NA	NA	NA	NA	NA	NA	NA	NA	NA	NA	NA	NA	NA	NA	NA	NA	NA	NA	NA	NA
					68	NA	NA	NA	NA	NA	NA	NA	NA	NA	NA	NA	NA	4.288	189.502	4.288	152.835	NA	NA	NA	NA	NA	NA	4.288	168.095	NA	NA	NA	NA	NA	NA	NA	NA	NA	NA	NA	NA	NA	NA	NA	NA	NA	NA	NA	NA
					69	NA	NA	NA	NA	NA	NA	NA	NA	NA	NA	NA	NA	4.352	201.865	4.352	171.785	NA	NA	NA	NA	NA	NA	4.352	174.061	NA	NA	NA	NA	NA	NA	NA	NA	NA	NA	NA	NA	NA	NA	NA	NA	NA	NA	NA	NA
					70	NA	NA	NA	NA	NA	NA	NA	NA	NA	NA	NA	NA	4.416	229.118	4.416	168.754	NA	NA	NA	NA	NA	NA	4.416	164.925	NA	NA	NA	NA	NA	NA	NA	NA	NA	NA	NA	NA	NA	NA	NA	NA	NA	NA	NA	NA
					71	NA	NA	NA	NA	NA	NA	NA	NA	NA	NA	NA	NA	4.48	249.874	4.48	140.925	NA	NA	NA	NA	NA	NA	4.48	164.128	NA	NA	NA	NA	NA	NA	NA	NA	NA	NA	NA	NA	NA	NA	NA	NA	NA	NA	NA	NA
					72	NA	NA	NA	NA	NA	NA	NA	NA	NA	NA	NA	NA	4.544	251.913	4.544	137.253	NA	NA	NA	NA	NA	NA	4.544	158.298	NA	NA	NA	NA	NA	NA	NA	NA	NA	NA	NA	NA	NA	NA	NA	NA	NA	NA	NA	NA
					73	NA	NA	NA	NA	NA	NA	NA	NA	NA	NA	NA	NA	4.608	250.495	4.608	146.395	NA	NA	NA	NA	NA	NA	4.608	180.72	NA	NA	NA	NA	NA	NA	NA	NA	NA	NA	NA	NA	NA	NA	NA	NA	NA	NA	NA	NA
					74	NA	NA	NA	NA	NA	NA	NA	NA	NA	NA	NA	NA	4.672	250.117	4.672	153.396	NA	NA	NA	NA	NA	NA	4.672	182.412	NA	NA	NA	NA	NA	NA	NA	NA	NA	NA	NA	NA	NA	NA	NA	NA	NA	NA	NA	NA
					75	NA	NA	NA	NA	NA	NA	NA	NA	NA	NA	NA	NA	4.736	243.732	4.736	157.815	NA	NA	NA	NA	NA	NA	NA	NA	NA	NA	NA	NA	NA	NA	NA	NA	NA	NA	NA	NA	NA	NA	NA	NA	NA	NA	NA	NA
					76	NA	NA	NA	NA	NA	NA	NA	NA	NA	NA	NA	NA	4.8	242.088	4.8	162.061	NA	NA	NA	NA	NA	NA	NA	NA	NA	NA	NA	NA	NA	NA	NA	NA	NA	NA	NA	NA	NA	NA	NA	NA	NA	NA	NA	NA
					77	NA	NA	NA	NA	NA	NA	NA	NA	NA	NA	NA	NA	4.864	242.888	4.864	148.451	NA	NA	NA	NA	NA	NA	NA	NA	NA	NA	NA	NA	NA	NA	NA	NA	NA	NA	NA	NA	NA	NA	NA	NA	NA	NA	NA	NA
					78	NA	NA	NA	NA	NA	NA	NA	NA	NA	NA	NA	NA	4.928	240.396	NA	NA	NA	NA	NA	NA	NA	NA	NA	NA	NA	NA	NA	NA	NA	NA	NA	NA	NA	NA	NA	NA	NA	NA	NA	NA	NA	NA	NA	NA
					79	NA	NA	NA	NA	NA	NA	NA	NA	NA	NA	NA	NA	4.992	251.02	NA	NA	NA	NA	NA	NA	NA	NA	NA	NA	NA	NA	NA	NA	NA	NA	NA	NA	NA	NA	NA	NA	NA	NA	NA	NA	NA	NA	NA	NA
					80	NA	NA	NA	NA	NA	NA	NA	NA	NA	NA	NA	NA	5.056	258.634	NA	NA	NA	NA	NA	NA	NA	NA	NA	NA	NA	NA	NA	NA	NA	NA	NA	NA	NA	NA	NA	NA	NA	NA	NA	NA	NA	NA	NA	NA
					81	NA	NA	NA	NA	NA	NA	NA	NA	NA	NA	NA	NA	5.12	259.842	NA	NA	NA	NA	NA	NA	NA	NA	NA	NA	NA	NA	NA	NA	NA	NA	NA	NA	NA	NA	NA	NA	NA	NA	NA	NA	NA	NA	NA	NA
					82	NA	NA	NA	NA	NA	NA	NA	NA	NA	NA	NA	NA	5.184	237.466	NA	NA	NA	NA	NA	NA	NA	NA	NA	NA	NA	NA	NA	NA	NA	NA	NA	NA	NA	NA	NA	NA	NA	NA	NA	NA	NA	NA	NA	NA
					83	NA	NA	NA	NA	NA	NA	NA	NA	NA	NA	NA	NA	5.248	225.663	NA	NA	NA	NA	NA	NA	NA	NA	NA	NA	NA	NA	NA	NA	NA	NA	NA	NA	NA	NA	NA	NA	NA	NA	NA	NA	NA	NA	NA	NA
					84	NA	NA	NA	NA	NA	NA	NA	NA	NA	NA	NA	NA	5.312	214.171	NA	NA	NA	NA	NA	NA	NA	NA	NA	NA	NA	NA	NA	NA	NA	NA	NA	NA	NA	NA	NA	NA	NA	NA	NA	NA	NA	NA	NA	NA
					85	NA	NA	NA	NA	NA	NA	NA	NA	NA	NA	NA	NA	5.376	231.183	NA	NA	NA	NA	NA	NA	NA	NA	NA	NA	NA	NA	NA	NA	NA	NA	NA	NA	NA	NA	NA	NA	NA	NA	NA	NA	NA	NA	NA	NA
					86	NA	NA	NA	NA	NA	NA	NA	NA	NA	NA	NA	NA	5.44	213.481	NA	NA	NA	NA	NA	NA	NA	NA	NA	NA	NA	NA	NA	NA	NA	NA	NA	NA	NA	NA	NA	NA	NA	NA	NA	NA	NA	NA	NA	NA
					87	NA	NA	NA	NA	NA	NA	NA	NA	NA	NA	NA	NA	5.504	213.424	NA	NA	NA	NA	NA	NA	NA	NA	NA	NA	NA	NA	NA	NA	NA	NA	NA	NA	NA	NA	NA	NA	NA	NA	NA	NA	NA	NA	NA	NA
					88	NA	NA	NA	NA	NA	NA	NA	NA	NA	NA	NA	NA	5.568	235.474	NA	NA	NA	NA	NA	NA	NA	NA	NA	NA	NA	NA	NA	NA	NA	NA	NA	NA	NA	NA	NA	NA	NA	NA	NA	NA	NA	NA	NA	NA
					89	NA	NA	NA	NA	NA	NA	NA	NA	NA	NA	NA	NA	5.632	229.514	NA	NA	NA	NA	NA	NA	NA	NA	NA	NA	NA	NA	NA	NA	NA	NA	NA	NA	NA	NA	NA	NA	NA	NA	NA	NA	NA	NA	NA	NA
					90	NA	NA	NA	NA	NA	NA	NA	NA	NA	NA	NA	NA	5.696	228.936	NA	NA	NA	NA	NA	NA	NA	NA	NA	NA	NA	NA	NA	NA	NA	NA	NA	NA	NA	NA	NA	NA	NA	NA	NA	NA	NA	NA	NA	NA
					91	NA	NA	NA	NA	NA	NA	NA	NA	NA	NA	NA	NA	5.76	237.111	NA	NA	NA	NA	NA	NA	NA	NA	NA	NA	NA	NA	NA	NA	NA	NA	NA	NA	NA	NA	NA	NA	NA	NA	NA	NA	NA	NA	NA	NA
					92	NA	NA	NA	NA	NA	NA	NA	NA	NA	NA	NA	NA	5.824	275.046	NA	NA	NA	NA	NA	NA	NA	NA	NA	NA	NA	NA	NA	NA	NA	NA	NA	NA	NA	NA	NA	NA	NA	NA	NA	NA	NA	NA	NA	NA
					93	NA	NA	NA	NA	NA	NA	NA	NA	NA	NA	NA	NA	5.888	312.5	NA	NA	NA	NA	NA	NA	NA	NA	NA	NA	NA	NA	NA	NA	NA	NA	NA	NA	NA	NA	NA	NA	NA	NA	NA	NA	NA	NA	NA	NA
					94	NA	NA	NA	NA	NA	NA	NA	NA	NA	NA	NA	NA	5.952	315.924	NA	NA	NA	NA	NA	NA	NA	NA	NA	NA	NA	NA	NA	NA	NA	NA	NA	NA	NA	NA	NA	NA	NA	NA	NA	NA	NA	NA	NA	NA
					95	NA	NA	NA	NA	NA	NA	NA	NA	NA	NA	NA	NA	6.016	339.285	NA	NA	NA	NA	NA	NA	NA	NA	NA	NA	NA	NA	NA	NA	NA	NA	NA	NA	NA	NA	NA	NA	NA	NA	NA	NA	NA	NA	NA	NA
					96	NA	NA	NA	NA	NA	NA	NA	NA	NA	NA	NA	NA	6.08	352.524	NA	NA	NA	NA	NA	NA	NA	NA	NA	NA	NA	NA	NA	NA	NA	NA	NA	NA	NA	NA	NA	NA	NA	NA	NA	NA	NA	NA	NA	NA
					97	NA	NA	NA	NA	NA	NA	NA	NA	NA	NA	NA	NA	6.144	331.463	NA	NA	NA	NA	NA	NA	NA	NA	NA	NA	NA	NA	NA	NA	NA	NA	NA	NA	NA	NA	NA	NA	NA	NA	NA	NA	NA	NA	NA	NA
[truncated: 156 more columns]

## Sheet: Ulp1
Ulp1-GFP						1								2								3								4								5								6
						Ic				Ir		Ibg		Ic				Ir		Ibg		Ic				Ir		Ibg		Ic				Ir		Ibg		Ic				Ir		Ibg		Ic
							160.557				221.795		141.058		178.205				226.157		147.234		181.05				219.132		149.13		225.35				300.185		164.304		175.692				239.912		155.22		228.207
							19.4982								30.9712								31.9207								61.0457								20.4719								71.5289
	average	median	SEM	n		Relative accumulation (RA)					80.7371			Relative accumulation (RA)					78.9233			Relative accumulation (RA)					70.0027			Relative accumulation (RA)					135.881			Relative accumulation (RA)					84.6925			Relative accumulation (RA)
RA:	0.393047	0.361365	0.0396693	29		0.241502								0.392421								0.455992								0.449258								0.241721								0.679336
	p-value
	2.27754e-12
						141119_VisSt_Ulp1_01_02Crop_1.tifGFP_x_lc	141119_VisSt_Ulp1_01_02Crop_1.tifGFP_y_lc	141119_VisSt_Ulp1_01_02Crop_1.tifmCh_x_cap	141119_VisSt_Ulp1_01_02Crop_1.tifmCh_y_cap	141119_VisSt_Ulp1_01_02Crop_1.tifGFP_x_lr	141119_VisSt_Ulp1_01_02Crop_1.tifGFP_y_lr	141119_VisSt_Ulp1_01_02Crop_1.tifGFP_x_bg	141119_VisSt_Ulp1_01_02Crop_1.tifGFP_y_bg	141119_VisSt_Ulp1_01_04Crop_1.tifGFP_x_lc	141119_VisSt_Ulp1_01_04Crop_1.tifGFP_y_lc	141119_VisSt_Ulp1_01_04Crop_1.tifmCh_x_cap	141119_VisSt_Ulp1_01_04Crop_1.tifmCh_y_cap	141119_VisSt_Ulp1_01_04Crop_1.tifGFP_x_lr	141119_VisSt_Ulp1_01_04Crop_1.tifGFP_y_lr	141119_VisSt_Ulp1_01_04Crop_1.tifGFP_x_bg	141119_VisSt_Ulp1_01_04Crop_1.tifGFP_y_bg	141119_VisSt_Ulp1_01_05Crop_1.tifGFP_x_lc	141119_VisSt_Ulp1_01_05Crop_1.tifGFP_y_lc	141119_VisSt_Ulp1_01_05Crop_1.tifmCh_x_cap	141119_VisSt_Ulp1_01_05Crop_1.tifmCh_y_cap	141119_VisSt_Ulp1_01_05Crop_1.tifGFP_x_lr	141119_VisSt_Ulp1_01_05Crop_1.tifGFP_y_lr	141119_VisSt_Ulp1_01_05Crop_1.tifGFP_x_bg	141119_VisSt_Ulp1_01_05Crop_1.tifGFP_y_bg	141119_VisSt_Ulp1_01_06Crop_1.tifGFP_x_lc	141119_VisSt_Ulp1_01_06Crop_1.tifGFP_y_lc	141119_VisSt_Ulp1_01_06Crop_1.tifmCh_x_cap	141119_VisSt_Ulp1_01_06Crop_1.tifmCh_y_cap	141119_VisSt_Ulp1_01_06Crop_1.tifGFP_x_lr	141119_VisSt_Ulp1_01_06Crop_1.tifGFP_y_lr	141119_VisSt_Ulp1_01_06Crop_1.tifGFP_x_bg	141119_VisSt_Ulp1_01_06Crop_1.tifGFP_y_bg	141119_VisSt_Ulp1_01_07Crop_1.tifGFP_x_lc	141119_VisSt_Ulp1_01_07Crop_1.tifGFP_y_lc	141119_VisSt_Ulp1_01_07Crop_1.tifmCh_x_cap	141119_VisSt_Ulp1_01_07Crop_1.tifmCh_y_cap	141119_VisSt_Ulp1_01_07Crop_1.tifGFP_x_lr	141119_VisSt_Ulp1_01_07Crop_1.tifGFP_y_lr	141119_VisSt_Ulp1_01_07Crop_1.tifGFP_x_bg	141119_VisSt_Ulp1_01_07Crop_1.tifGFP_y_bg	141119_VisSt_Ulp1_01_09Crop_1.tifGFP_x_lc	141119_VisSt_Ulp1_01_09Crop_1.tifGFP_y_lc	141119_VisSt_Ulp1_01_09Crop_1.tifmCh_x_cap	141119_VisSt_Ulp1_01_09Crop_1.tifmCh_y_cap
					1	0	202	0	369	0	202	0	145	0	188	0	495	0	241	0	145	0	164	0	583	0	183	0	137	0	313	0	1158	0	195	0	159	0	245	0	341	0	298	0	159	0	249	0	1116
					2	0.064	197.694	0.064	512.373	0.064	194.065	0.064	141.484	0.064	196.748	0.064	688.047	0.064	237.505	0.064	147.25	0.064	168.695	0.064	640.212	0.064	175.884	0.064	149.463	0.064	256	0.064	1696.29	0.064	190.5	0.064	162.136	0.064	191	0.064	397	0.064	286.32	0.064	148.03	0.064	220.308	0.064	1455.8
					3	0.128	176.923	0.128	673.63	0.128	205.255	0.128	144.885	0.128	223.023	0.128	843.583	0.128	225.928	0.128	154.039	0.128	175.402	0.128	670.906	0.128	170.791	0.128	159.924	0.128	253	0.128	2139.65	0.128	211.298	0.128	160.455	0.128	162	0.128	391	0.128	268.24	0.128	141.148	0.128	196.66	0.128	1743.7
					4	0.192	165.742	0.192	845.515	0.192	220.467	0.192	140.844	0.192	235.289	0.192	875.95	0.192	224.653	0.192	157.369	0.192	183.487	0.192	688.366	0.192	180.286	0.192	161.037	0.192	232	0.192	2326.93	0.192	244.067	0.192	141.561	0.192	161	0.192	401	0.192	261.96	0.192	152.133	0.192	197.235	0.192	2006.66
					5	0.256	160.388	0.256	1005.84	0.256	227.289	0.256	139.953	0.256	241.588	0.256	916.49	0.256	229.225	0.256	151.581	0.256	176.301	0.256	732.075	0.256	189.485	0.256	152.163	0.256	225	0.256	2312.24	0.256	271.214	0.256	142.939	0.256	164	0.256	385	0.256	259.76	0.256	169.227	0.256	210.925	0.256	2210.93
					6	0.32	146.65	0.32	1121.25	0.32	240.799	0.32	137.784	0.32	226.899	0.32	907.223	0.32	234.787	0.32	153.411	0.32	168.29	0.32	784.849	0.32	191.652	0.32	146.343	0.32	203	0.32	2185.07	0.32	253.86	0.32	164.592	0.32	167	0.32	356	0.32	268	0.32	181.674	0.32	241.023	0.32	2323.06
					7	0.384	137.86	0.384	1160.31	0.384	241.76	0.384	132.545	0.384	203.623	0.384	769.204	0.384	234.797	0.384	153.523	0.384	169.41	0.384	868.728	0.384	196.574	0.384	143.739	0.384	182	0.384	2116.94	0.384	235.579	0.384	162.886	0.384	167.72	0.384	358.68	0.384	283.723	0.384	182.38	0.384	271.001	0.384	2352.86
					8	0.448	133.93	0.448	1119.48	0.448	226.459	0.448	130.238	0.448	170.228	0.448	650.718	0.448	216.649	0.448	148.083	0.448	174.52	0.448	885.957	0.448	223.224	0.448	140.139	0.448	176	0.448	2202.95	0.448	196.881	0.448	170.621	0.448	163.36	0.448	389.68	0.448	263.947	0.448	178.716	0.448	270.112	0.448	2236.1
					9	0.512	143.267	0.512	973.87	0.512	210.808	0.512	131.496	0.512	162.348	0.512	566.134	0.512	208.734	0.512	142.172	0.512	163.711	0.512	933.172	0.512	212.901	0.512	140.072	0.512	171	0.512	2308.22	0.512	190.511	0.512	170.945	0.512	159.2	0.512	454.32	0.512	232.16	0.512	177.385	0.512	280.726	0.512	2075.36
					10	0.576	143.484	0.576	753.45	0.576	199.947	0.576	140.189	0.576	163.758	0.576	482.283	0.576	221.001	0.576	138.476	0.576	155.542	0.576	1005.76	0.576	220.861	0.576	138.836	0.576	162	0.576	2307.38	0.576	225.585	0.576	168.021	0.576	170.52	0.576	447.96	0.576	205.766	0.576	172.678	0.576	262.16	0.576	1896.06
					11	0.64	136.346	0.64	539.62	0.64	198.203	0.64	147.955	0.64	157.969	0.64	398.696	0.64	220.19	0.64	135.941	0.64	159.341	0.64	1027.91	0.64	223.696	0.64	139.128	0.64	151	0.64	2201.74	0.64	271.725	0.64	180.905	0.64	182	0.64	396	0.64	192.312	0.64	168.113	0.64	220.87	0.64	1644.76
					12	0.704	140.049	0.704	382.297	0.704	202.083	0.704	140.995	0.704	160.524	NA	NA	0.704	219.665	0.704	142.375	0.704	169.184	0.704	1072	0.704	217.786	0.704	152.84	0.704	159.811	0.704	2127.51	0.704	312.004	0.704	170.713	0.704	169.17	0.704	409.016	0.704	202.024	0.704	156.697	0.704	193.34	0.704	1322.37
					13	0.768	146.988	0.768	297.803	0.768	196.497	0.768	130.025	0.768	156.271	NA	NA	0.768	218.35	0.768	142.691	0.768	184.946	0.768	1088.18	0.768	217.092	0.768	159.352	0.768	173.62	0.768	2193.57	0.768	318.622	0.768	157.116	0.768	171.717	0.768	431.287	0.768	220.684	0.768	158.242	0.768	194.64	0.768	977.692
					14	0.832	149.466	0.832	258.203	0.832	195.543	0.832	125.975	0.832	145.006	NA	NA	0.832	209.725	0.832	136.911	0.832	201.169	0.832	1023.37	0.832	205.479	0.832	163.479	0.832	180.357	0.832	2384.95	0.832	289.121	0.832	173.433	0.832	171.667	0.832	420.801	0.832	241.325	0.832	173.104	0.832	199.55	NA	NA
					15	0.896	160.446	0.896	225.847	0.896	199.148	0.896	125.263	0.896	140.258	NA	NA	0.896	215.46	0.896	138.072	0.896	196.512	0.896	962.097	0.896	213.795	0.896	172.499	0.896	212.096	0.896	2443.87	0.896	251.841	0.896	189.658	0.896	179.112	0.896	384.073	0.896	259.064	0.896	170.676	0.896	210.01	NA	NA
					16	0.96	171.899	0.96	201.382	0.96	212.37	0.96	126.373	0.96	144.56	NA	NA	0.96	231.361	0.96	133.671	0.96	191.985	0.96	891.927	0.96	226.65	0.96	164.001	0.96	223.082	0.96	2438.33	0.96	221.189	0.96	181.369	0.96	179.324	0.96	326.59	0.96	257.409	0.96	161.27	0.96	233.75	NA	NA
					17	1.024	184.512	NA	NA	1.024	225.581	1.024	133.611	1.024	164.809	NA	NA	1.024	210.4	1.024	133.782	1.024	199.904	1.024	798.134	1.024	201.109	1.024	149.186	1.024	210.352	1.024	2339.14	1.024	224.813	1.024	178.187	1.024	182.973	1.024	258.994	1.024	241.877	1.024	163.766	NA	NA	NA	NA
					18	1.088	192.373	NA	NA	1.088	232.81	1.088	138.629	1.088	169.666	NA	NA	1.088	192	1.088	141.07	1.088	203.34	1.088	705.219	1.088	181.32	1.088	146.229	1.088	209.573	1.088	2252.35	1.088	260.274	1.088	176.467	NA	NA	NA	NA	1.088	238.989	1.088	164.282	NA	NA	NA	NA
					19	NA	NA	NA	NA	1.152	240.548	1.152	136.521	1.152	161.264	NA	NA	1.152	199.4	1.152	146.483	1.152	207.581	1.152	586.251	1.152	186.8	1.152	145.246	1.152	234.393	1.152	2211.86	1.152	303.743	1.152	167.403	NA	NA	NA	NA	1.152	233.135	1.152	165.649	NA	NA	NA	NA
					20	NA	NA	NA	NA	1.216	228.556	1.216	136.686	1.216	152.271	NA	NA	1.216	208.497	1.216	144.836	1.216	209.32	1.216	472.6	1.216	206.6	1.216	138.364	1.216	228.256	1.216	2142.29	1.216	373.583	1.216	153.444	NA	NA	NA	NA	1.216	252.181	1.216	163.797	NA	NA	NA	NA
					21	NA	NA	NA	NA	1.28	208.648	1.28	142.931	NA	NA	NA	NA	1.28	208.487	1.28	150.191	1.28	196.61	1.28	403.78	1.28	234.04	1.28	131.42	1.28	192.299	1.28	2057.84	1.28	415.721	1.28	149.465	NA	NA	NA	NA	1.28	257.765	1.28	152.473	NA	NA	NA	NA
					22	NA	NA	NA	NA	1.344	209.289	1.344	151.755	NA	NA	NA	NA	1.344	199.773	1.344	141.39	1.344	176.93	1.344	373	1.344	245.48	1.344	126.781	1.344	184.726	1.344	1934.21	1.344	393.189	1.344	153.916	NA	NA	NA	NA	1.344	239.54	1.344	144.292	NA	NA	NA	NA
					23	NA	NA	NA	NA	1.408	219.96	1.408	157.763	NA	NA	NA	NA	1.408	188.854	1.408	136.904	1.408	172.01	NA	NA	1.408	230.64	1.408	131.902	1.408	203.281	1.408	1727.09	1.408	334.658	1.408	159.865	NA	NA	NA	NA	1.408	240.754	1.408	138.879	NA	NA	NA	NA
					24	NA	NA	NA	NA	1.472	225.445	1.472	150.462	NA	NA	NA	NA	1.472	181.625	1.472	142.381	1.472	177.02	NA	NA	1.472	210.916	1.472	139.161	1.472	216.394	1.472	1485.77	1.472	280.036	1.472	172.242	NA	NA	NA	NA	1.472	238.826	1.472	146.031	NA	NA	NA	NA
					25	NA	NA	NA	NA	1.536	239.764	1.536	131.424	NA	NA	NA	NA	1.536	180.908	1.536	142.538	NA	NA	NA	NA	1.536	193.269	1.536	144.38	1.536	225.883	1.536	1168.88	1.536	292.367	1.536	176.663	NA	NA	NA	NA	1.536	237.038	1.536	156.931	NA	NA	NA	NA
					26	NA	NA	NA	NA	1.6	252.408	1.6	134.277	NA	NA	NA	NA	1.6	199.515	1.6	143.817	NA	NA	NA	NA	1.6	198.05	1.6	153.129	1.6	220.606	NA	NA	1.6	349.236	1.6	174.839	NA	NA	NA	NA	1.6	241.358	1.6	157.707	NA	NA	NA	NA
					27	NA	NA	NA	NA	1.664	232.332	1.664	137.75	NA	NA	NA	NA	1.664	237.617	1.664	143.236	NA	NA	NA	NA	1.664	192.011	1.664	152.426	1.664	204.974	NA	NA	1.664	379.567	1.664	165.561	NA	NA	NA	NA	1.664	230.547	1.664	161.306	NA	NA	NA	NA
					28	NA	NA	NA	NA	1.728	225.687	1.728	134.819	NA	NA	NA	NA	1.728	260.732	1.728	139.185	NA	NA	NA	NA	1.728	189.963	1.728	158.068	1.728	190.327	NA	NA	1.728	402.511	1.728	150.288	NA	NA	NA	NA	1.728	216.942	1.728	157.37	NA	NA	NA	NA
					29	NA	NA	NA	NA	1.792	225.186	1.792	138.173	NA	NA	NA	NA	1.792	268.36	1.792	142.747	NA	NA	NA	NA	1.792	183.341	1.792	162.391	1.792	182.138	NA	NA	1.792	417.276	1.792	144.228	NA	NA	NA	NA	1.792	219.3	1.792	148.193	NA	NA	NA	NA
					30	NA	NA	NA	NA	1.856	215.26	1.856	135.926	NA	NA	NA	NA	1.856	293.175	1.856	150.053	NA	NA	NA	NA	1.856	170.552	1.856	160.967	1.856	191.07	NA	NA	1.856	421.005	1.856	155.66	NA	NA	NA	NA	1.856	228.377	1.856	162.645	NA	NA	NA	NA
					31	NA	NA	NA	NA	1.92	217.924	1.92	135.548	NA	NA	NA	NA	1.92	320.012	1.92	153.84	NA	NA	NA	NA	1.92	182.139	1.92	155.362	1.92	193.625	NA	NA	1.92	383.668	1.92	149.644	NA	NA	NA	NA	1.92	233.552	1.92	162.306	NA	NA	NA	NA
					32	NA	NA	NA	NA	1.984	219.387	1.984	136.7	NA	NA	NA	NA	1.984	314.584	1.984	157.319	NA	NA	NA	NA	1.984	215.787	1.984	148.792	1.984	170.646	NA	NA	1.984	344.143	1.984	137.805	NA	NA	NA	NA	1.984	243.422	1.984	150.145	NA	NA	NA	NA
					33	NA	NA	NA	NA	2.048	203.332	2.048	131.011	NA	NA	NA	NA	2.048	279.994	2.048	161.097	NA	NA	NA	NA	2.048	254.09	2.048	146.039	2.048	174.154	NA	NA	2.048	339.124	2.048	138.515	NA	NA	NA	NA	2.048	240.06	2.048	150.331	NA	NA	NA	NA
					34	NA	NA	NA	NA	2.112	217.36	2.112	136.117	NA	NA	NA	NA	2.112	259.966	2.112	150.785	NA	NA	NA	NA	2.112	290.741	2.112	148.345	2.112	214.724	NA	NA	2.112	321.418	2.112	156.845	NA	NA	NA	NA	2.112	235.772	2.112	159.842	NA	NA	NA	NA
					35	NA	NA	NA	NA	2.176	244.226	2.176	137.933	NA	NA	NA	NA	2.176	248.93	2.176	143.068	NA	NA	NA	NA	2.176	278.557	2.176	152.523	2.176	214.993	NA	NA	2.176	281.91	2.176	179.739	NA	NA	NA	NA	2.176	223.254	2.176	153.9	NA	NA	NA	NA
					36	NA	NA	NA	NA	2.24	273.98	2.24	132.67	NA	NA	NA	NA	2.24	221.151	2.24	133.284	NA	NA	NA	NA	2.24	246.372	2.24	158.414	2.24	216.036	NA	NA	2.24	268.686	2.24	173.458	NA	NA	NA	NA	2.24	220.79	2.24	143.9	NA	NA	NA	NA
					37	NA	NA	NA	NA	2.304	288.808	2.304	135.3	NA	NA	NA	NA	2.304	211.175	2.304	133.909	NA	NA	NA	NA	2.304	225.022	2.304	163.706	2.304	217.925	NA	NA	2.304	303.851	2.304	173.977	NA	NA	NA	NA	2.304	220.163	2.304	143.91	NA	NA	NA	NA
					38	NA	NA	NA	NA	2.368	269.409	2.368	136.019	NA	NA	NA	NA	2.368	209.268	2.368	150.786	NA	NA	NA	NA	2.368	227.603	2.368	167.438	2.368	198.282	NA	NA	2.368	307.348	2.368	203.272	NA	NA	NA	NA	2.368	242.267	2.368	144	NA	NA	NA	NA
					39	NA	NA	NA	NA	2.432	270.667	2.432	133.503	NA	NA	NA	NA	2.432	199.214	2.432	157.069	NA	NA	NA	NA	2.432	221.814	2.432	172.682	2.432	190.894	NA	NA	2.432	285.971	2.432	200.621	NA	NA	NA	NA	2.432	269.349	2.432	148.55	NA	NA	NA	NA
					40	NA	NA	NA	NA	2.496	260.729	2.496	133.49	NA	NA	NA	NA	2.496	163.623	2.496	149.029	NA	NA	NA	NA	2.496	239.577	2.496	176.969	2.496	244.692	NA	NA	2.496	276.559	2.496	183.324	NA	NA	NA	NA	2.496	262.725	2.496	161.74	NA	NA	NA	NA
					41	NA	NA	NA	NA	2.56	238.263	2.56	125.376	NA	NA	NA	NA	NA	NA	2.56	139.197	NA	NA	NA	NA	2.56	269.697	2.56	167.819	2.56	346.962	NA	NA	2.56	297.461	2.56	165.045	NA	NA	NA	NA	2.56	235.319	2.56	165.73	NA	NA	NA	NA
					42	NA	NA	NA	NA	2.624	210.123	2.624	121.667	NA	NA	NA	NA	NA	NA	2.624	139.509	NA	NA	NA	NA	2.624	261.757	2.624	158.745	2.624	411.823	NA	NA	2.624	325.378	2.624	160.19	NA	NA	NA	NA	2.624	223.727	2.624	168.203	NA	NA	NA	NA
					43	NA	NA	NA	NA	2.688	186.055	2.688	135.975	NA	NA	NA	NA	NA	NA	2.688	140.641	NA	NA	NA	NA	2.688	226.367	2.688	157.277	2.688	416.119	NA	NA	2.688	310.252	2.688	156.634	NA	NA	NA	NA	2.688	226.639	2.688	163.105	NA	NA	NA	NA
					44	NA	NA	NA	NA	2.752	179.066	2.752	151.478	NA	NA	NA	NA	NA	NA	2.752	156.297	NA	NA	NA	NA	2.752	214.512	2.752	143.138	2.752	446.991	NA	NA	2.752	287.273	2.752	159.42	NA	NA	NA	NA	2.752	238.983	2.752	148.313	NA	NA	NA	NA
					45	NA	NA	NA	NA	2.816	190.926	2.816	141.784	NA	NA	NA	NA	NA	NA	2.816	165.899	NA	NA	NA	NA	2.816	231.627	2.816	131.516	2.816	411.065	NA	NA	2.816	274.801	2.816	163.536	NA	NA	NA	NA	2.816	225.834	2.816	141.122	NA	NA	NA	NA
					46	NA	NA	NA	NA	2.88	217.778	2.88	133.486	NA	NA	NA	NA	NA	NA	2.88	160.679	NA	NA	NA	NA	2.88	246.31	2.88	130.735	2.88	311.577	NA	NA	2.88	275.337	2.88	164.397	NA	NA	NA	NA	2.88	198.128	2.88	142.921	NA	NA	NA	NA
					47	NA	NA	NA	NA	2.944	228.525	2.944	135.339	NA	NA	NA	NA	NA	NA	2.944	161.928	NA	NA	NA	NA	2.944	235.561	2.944	138.737	2.944	222.296	NA	NA	2.944	278.671	2.944	167.579	NA	NA	NA	NA	2.944	194.999	2.944	140.737	NA	NA	NA	NA
					48	NA	NA	NA	NA	3.008	229.826	3.008	146.27	NA	NA	NA	NA	NA	NA	3.008	161.061	NA	NA	NA	NA	3.008	250.673	3.008	151.128	3.008	178.904	NA	NA	3.008	298.245	3.008	150.748	NA	NA	NA	NA	3.008	202.448	3.008	134.034	NA	NA	NA	NA
					49	NA	NA	NA	NA	3.072	214.726	3.072	154.53	NA	NA	NA	NA	NA	NA	3.072	151.933	NA	NA	NA	NA	3.072	275.294	3.072	157.477	3.072	165.654	NA	NA	3.072	330.68	3.072	141.643	NA	NA	NA	NA	3.072	202.641	3.072	135.038	NA	NA	NA	NA
					50	NA	NA	NA	NA	3.136	203.942	3.136	148.1	NA	NA	NA	NA	NA	NA	3.136	151.34	NA	NA	NA	NA	3.136	289.876	3.136	162.514	3.136	152.885	NA	NA	3.136	364.193	3.136	146.799	NA	NA	NA	NA	3.136	215.837	3.136	144.793	NA	NA	NA	NA
					51	NA	NA	NA	NA	3.2	192.348	3.2	141.26	NA	NA	NA	NA	NA	NA	3.2	145.274	NA	NA	NA	NA	NA	NA	3.2	169.255	NA	NA	NA	NA	3.2	427.498	3.2	160.271	NA	NA	NA	NA	3.2	231.875	3.2	148.713	NA	NA	NA	NA
					52	NA	NA	NA	NA	NA	NA	3.264	140.79	NA	NA	NA	NA	NA	NA	3.264	142.98	NA	NA	NA	NA	NA	NA	3.264	173.293	NA	NA	NA	NA	NA	NA	3.264	166.537	NA	NA	NA	NA	3.264	239.095	3.264	152.211	NA	NA	NA	NA
					53	NA	NA	NA	NA	NA	NA	3.328	144.95	NA	NA	NA	NA	NA	NA	3.328	142.98	NA	NA	NA	NA	NA	NA	3.328	158.846	NA	NA	NA	NA	NA	NA	3.328	161.565	NA	NA	NA	NA	3.328	224.876	3.328	153.115	NA	NA	NA	NA
					54	NA	NA	NA	NA	NA	NA	3.392	146	NA	NA	NA	NA	NA	NA	3.392	144.102	NA	NA	NA	NA	NA	NA	3.392	142.508	NA	NA	NA	NA	NA	NA	3.392	161.645	NA	NA	NA	NA	3.392	207.191	3.392	142.497	NA	NA	NA	NA
					55	NA	NA	NA	NA	NA	NA	3.456	142.05	NA	NA	NA	NA	NA	NA	3.456	140.112	NA	NA	NA	NA	NA	NA	3.456	138.371	NA	NA	NA	NA	NA	NA	3.456	149.495	NA	NA	NA	NA	3.456	196.003	3.456	141.197	NA	NA	NA	NA
					56	NA	NA	NA	NA	NA	NA	3.52	141.79	NA	NA	NA	NA	NA	NA	3.52	136.738	NA	NA	NA	NA	NA	NA	3.52	135.395	NA	NA	NA	NA	NA	NA	3.52	152.925	NA	NA	NA	NA	3.52	197.919	3.52	154.274	NA	NA	NA	NA
					57	NA	NA	NA	NA	NA	NA	3.584	155.43	NA	NA	NA	NA	NA	NA	3.584	134.608	NA	NA	NA	NA	NA	NA	3.584	134.047	NA	NA	NA	NA	NA	NA	3.584	145.814	NA	NA	NA	NA	3.584	210.785	3.584	158.127	NA	NA	NA	NA
					58	NA	NA	NA	NA	NA	NA	3.648	170.06	NA	NA	NA	NA	NA	NA	3.648	140.53	NA	NA	NA	NA	NA	NA	3.648	133.626	NA	NA	NA	NA	NA	NA	3.648	135.312	NA	NA	NA	NA	3.648	233.029	3.648	148.525	NA	NA	NA	NA
					59	NA	NA	NA	NA	NA	NA	3.712	166.68	NA	NA	NA	NA	NA	NA	3.712	151.044	NA	NA	NA	NA	NA	NA	3.712	142.384	NA	NA	NA	NA	NA	NA	3.712	158.801	NA	NA	NA	NA	3.712	257.213	3.712	142.055	NA	NA	NA	NA
					60	NA	NA	NA	NA	NA	NA	3.776	165	NA	NA	NA	NA	NA	NA	3.776	159.331	NA	NA	NA	NA	NA	NA	3.776	158.392	NA	NA	NA	NA	NA	NA	3.776	177.794	NA	NA	NA	NA	3.776	267.88	3.776	142.568	NA	NA	NA	NA
					61	NA	NA	NA	NA	NA	NA	3.84	177.64	NA	NA	NA	NA	NA	NA	3.84	159.626	NA	NA	NA	NA	NA	NA	3.84	167.901	NA	NA	NA	NA	NA	NA	3.84	182.677	NA	NA	NA	NA	3.84	280.854	3.84	155.906	NA	NA	NA	NA
					62	NA	NA	NA	NA	NA	NA	3.904	169.94	NA	NA	NA	NA	NA	NA	3.904	149.996	NA	NA	NA	NA	NA	NA	3.904	152.585	NA	NA	NA	NA	NA	NA	3.904	162.712	NA	NA	NA	NA	3.904	275.31	3.904	172.264	NA	NA	NA	NA
					63	NA	NA	NA	NA	NA	NA	NA	NA	NA	NA	NA	NA	NA	NA	3.968	149.644	NA	NA	NA	NA	NA	NA	3.968	136.549	NA	NA	NA	NA	NA	NA	3.968	160.489	NA	NA	NA	NA	3.968	272.498	3.968	168.852	NA	NA	NA	NA
					64	NA	NA	NA	NA	NA	NA	NA	NA	NA	NA	NA	NA	NA	NA	4.032	158.046	NA	NA	NA	NA	NA	NA	4.032	132.554	NA	NA	NA	NA	NA	NA	4.032	178.397	NA	NA	NA	NA	4.032	293.248	4.032	152.369	NA	NA	NA	NA
					65	NA	NA	NA	NA	NA	NA	NA	NA	NA	NA	NA	NA	NA	NA	4.096	159.125	NA	NA	NA	NA	NA	NA	4.096	138.226	NA	NA	NA	NA	NA	NA	4.096	178.511	NA	NA	NA	NA	4.096	283.221	4.096	143.065	NA	NA	NA	NA
					66	NA	NA	NA	NA	NA	NA	NA	NA	NA	NA	NA	NA	NA	NA	4.16	154.462	NA	NA	NA	NA	NA	NA	4.16	140.575	NA	NA	NA	NA	NA	NA	4.16	173.074	NA	NA	NA	NA	4.16	270.68	4.16	145.556	NA	NA	NA	NA
					67	NA	NA	NA	NA	NA	NA	NA	NA	NA	NA	NA	NA	NA	NA	4.224	150.54	NA	NA	NA	NA	NA	NA	4.224	138.901	NA	NA	NA	NA	NA	NA	4.224	188.22	NA	NA	NA	NA	4.224	259.227	4.224	145.708	NA	NA	NA	NA
					68	NA	NA	NA	NA	NA	NA	NA	NA	NA	NA	NA	NA	NA	NA	4.288	149.818	NA	NA	NA	NA	NA	NA	4.288	141.624	NA	NA	NA	NA	NA	NA	4.288	170.664	NA	NA	NA	NA	NA	NA	4.288	144.778	NA	NA	NA	NA
					69	NA	NA	NA	NA	NA	NA	NA	NA	NA	NA	NA	NA	NA	NA	4.352	152.338	NA	NA	NA	NA	NA	NA	4.352	146.833	NA	NA	NA	NA	NA	NA	NA	NA	NA	NA	NA	NA	NA	NA	4.352	143.974	NA	NA	NA	NA
					70	NA	NA	NA	NA	NA	NA	NA	NA	NA	NA	NA	NA	NA	NA	NA	NA	NA	NA	NA	NA	NA	NA	4.416	135.203	NA	NA	NA	NA	NA	NA	NA	NA	NA	NA	NA	NA	NA	NA	4.416	149.952	NA	NA	NA	NA
					71	NA	NA	NA	NA	NA	NA	NA	NA	NA	NA	NA	NA	NA	NA	NA	NA	NA	NA	NA	NA	NA	NA	4.48	122.124	NA	NA	NA	NA	NA	NA	NA	NA	NA	NA	NA	NA	NA	NA	4.48	156.197	NA	NA	NA	NA
					72	NA	NA	NA	NA	NA	NA	NA	NA	NA	NA	NA	NA	NA	NA	NA	NA	NA	NA	NA	NA	NA	NA	NA	NA	NA	NA	NA	NA	NA	NA	NA	NA	NA	NA	NA	NA	NA	NA	4.544	154.7	NA	NA	NA	NA
					73	NA	NA	NA	NA	NA	NA	NA	NA	NA	NA	NA	NA	NA	NA	NA	NA	NA	NA	NA	NA	NA	NA	NA	NA	NA	NA	NA	NA	NA	NA	NA	NA	NA	NA	NA	NA	NA	NA	4.608	146.795	NA	NA	NA	NA
					74	NA	NA	NA	NA	NA	NA	NA	NA	NA	NA	NA	NA	NA	NA	NA	NA	NA	NA	NA	NA	NA	NA	NA	NA	NA	NA	NA	NA	NA	NA	NA	NA	NA	NA	NA	NA	NA	NA	4.672	146.577	NA	NA	NA	NA
					75	NA	NA	NA	NA	NA	NA	NA	NA	NA	NA	NA	NA	NA	NA	NA	NA	NA	NA	NA	NA	NA	NA	NA	NA	NA	NA	NA	NA	NA	NA	NA	NA	NA	NA	NA	NA	NA	NA	4.736	158.774	NA	NA	NA	NA
					76	NA	NA	NA	NA	NA	NA	NA	NA	NA	NA	NA	NA	NA	NA	NA	NA	NA	NA	NA	NA	NA	NA	NA	NA	NA	NA	NA	NA	NA	NA	NA	NA	NA	NA	NA	NA	NA	NA	4.8	167.9	NA	NA	NA	NA
					77	NA	NA	NA	NA	NA	NA	NA	NA	NA	NA	NA	NA	NA	NA	NA	NA	NA	NA	NA	NA	NA	NA	NA	NA	NA	NA	NA	NA	NA	NA	NA	NA	NA	NA	NA	NA	NA	NA	4.864	170.579	NA	NA	NA	NA
					78	NA	NA	NA	NA	NA	NA	NA	NA	NA	NA	NA	NA	NA	NA	NA	NA	NA	NA	NA	NA	NA	NA	NA	NA	NA	NA	NA	NA	NA	NA	NA	NA	NA	NA	NA	NA	NA	NA	4.928	164.302	NA	NA	NA	NA
					79	NA	NA	NA	NA	NA	NA	NA	NA	NA	NA	NA	NA	NA	NA	NA	NA	NA	NA	NA	NA	NA	NA	NA	NA	NA	NA	NA	NA	NA	NA	NA	NA	NA	NA	NA	NA	NA	NA	4.992	154.404	NA	NA	NA	NA
					80	NA	NA	NA	NA	NA	NA	NA	NA	NA	NA	NA	NA	NA	NA	NA	NA	NA	NA	NA	NA	NA	NA	NA	NA	NA	NA	NA	NA	NA	NA	NA	NA	NA	NA	NA	NA	NA	NA	5.056	154.531	NA	NA	NA	NA
					81	NA	NA	NA	NA	NA	NA	NA	NA	NA	NA	NA	NA	NA	NA	NA	NA	NA	NA	NA	NA	NA	NA	NA	NA	NA	NA	NA	NA	NA	NA	NA	NA	NA	NA	NA	NA	NA	NA	5.12	155.942	NA	NA	NA	NA
[truncated: 188 more columns]

## Sheet: Dbp5
Dbp5-GFP						1								2								3								4								5								6
						Ic				Ir		Ibg		Ic				Ir		Ibg		Ic				Ir		Ibg		Ic				Ir		Ibg		Ic				Ir		Ibg		Ic
							249.195				898.527		227.138		623.052				536.879		164.876		184.296				600.19		183.564		317.539				330.012		170.832		288.781				510.189		178.934		386.895
							22.0571								458.176								0.732204								146.708								109.847								202.639
	average	median	SEM	n		Relative accumulation (RA)					671.389			Relative accumulation (RA)					372.003			Relative accumulation (RA)					416.626			Relative accumulation (RA)					159.18			Relative accumulation (RA)					331.255			Relative accumulation (RA)
RA:	0.725759	0.746331	0.084808	26		0.0328529								1.23165								0.00175746								0.921644								0.331609								0.803024
	p-value
	0.00452653
						180530_15369_Dpb5_01_01_Crop_1GFP_x_lc	180530_15369_Dpb5_01_01_Crop_1GFP_y_lc	180530_15369_Dpb5_01_01_Crop_1mCh_x_cap	180530_15369_Dpb5_01_01_Crop_1mCh_y_cap	180530_15369_Dpb5_01_01_Crop_1GFP_x_lr	180530_15369_Dpb5_01_01_Crop_1GFP_y_lr	180530_15369_Dpb5_01_01_Crop_1GFP_x_bg	180530_15369_Dpb5_01_01_Crop_1GFP_y_bg	180530_15369_Dpb5_01_02_Crop_1GFP_x_lc	180530_15369_Dpb5_01_02_Crop_1GFP_y_lc	180530_15369_Dpb5_01_02_Crop_1mCh_x_cap	180530_15369_Dpb5_01_02_Crop_1mCh_y_cap	180530_15369_Dpb5_01_02_Crop_1GFP_x_lr	180530_15369_Dpb5_01_02_Crop_1GFP_y_lr	180530_15369_Dpb5_01_02_Crop_1GFP_x_bg	180530_15369_Dpb5_01_02_Crop_1GFP_y_bg	180530_15369_Dpb5_01_03_Crop_1GFP_x_lc	180530_15369_Dpb5_01_03_Crop_1GFP_y_lc	180530_15369_Dpb5_01_03_Crop_1mCh_x_cap	180530_15369_Dpb5_01_03_Crop_1mCh_y_cap	180530_15369_Dpb5_01_03_Crop_1GFP_x_lr	180530_15369_Dpb5_01_03_Crop_1GFP_y_lr	180530_15369_Dpb5_01_03_Crop_1GFP_x_bg	180530_15369_Dpb5_01_03_Crop_1GFP_y_bg	180530_15369_Dpb5_01_03_Crop_2GFP_x_lc	180530_15369_Dpb5_01_03_Crop_2GFP_y_lc	180530_15369_Dpb5_01_03_Crop_2mCh_x_cap	180530_15369_Dpb5_01_03_Crop_2mCh_y_cap	180530_15369_Dpb5_01_03_Crop_2GFP_x_lr	180530_15369_Dpb5_01_03_Crop_2GFP_y_lr	180530_15369_Dpb5_01_03_Crop_2GFP_x_bg	180530_15369_Dpb5_01_03_Crop_2GFP_y_bg	180530_15369_Dpb5_01_04_Crop_1GFP_x_lc	180530_15369_Dpb5_01_04_Crop_1GFP_y_lc	180530_15369_Dpb5_01_04_Crop_1mCh_x_cap	180530_15369_Dpb5_01_04_Crop_1mCh_y_cap	180530_15369_Dpb5_01_04_Crop_1GFP_x_lr	180530_15369_Dpb5_01_04_Crop_1GFP_y_lr	180530_15369_Dpb5_01_04_Crop_1GFP_x_bg	180530_15369_Dpb5_01_04_Crop_1GFP_y_bg	180530_15369_Dpb5_01_05_Crop_2GFP_x_lc	180530_15369_Dpb5_01_05_Crop_2GFP_y_lc	180530_15369_Dpb5_01_05_Crop_2mCh_x_cap	180530_15369_Dpb5_01_05_Crop_2mCh_y_cap
					1	0	167	0	71	0	847	0	238	0	630	0	173	0	799	0	146	0	228	0	217	0	500	0	213	0	258	0	97	0	441	0	147	0	318	0	102	0	329	0	158	0	727	0	57
					2	0.064	157.633	0.064	137.612	0.064	1003.51	0.064	229.214	0.064	574.679	0.064	236.209	0.064	816	0.064	158.179	0.064	223.65	0.064	318.15	0.064	686	0.064	201.193	0.064	311.969	0.064	99.636	0.064	455.806	0.064	151.05	0.064	272.101	0.064	123.521	0.064	380.035	0.064	174.261	0.064	618.8	0.064	157
					3	0.128	155.211	0.128	283.82	0.128	1199.08	0.128	230.265	0.128	466.675	0.128	323.376	0.128	756	0.128	165.042	0.128	221.192	0.128	402.167	0.128	718	0.128	175.324	0.128	304.472	0.128	112.554	0.128	424.046	0.128	146.237	0.128	234.817	0.128	145.459	0.128	441.974	0.128	181.904	0.128	509.64	0.128	377
					4	0.192	169.731	0.192	551.855	0.192	1506.21	0.192	226.816	0.192	379.006	0.192	429.674	0.192	741	0.192	179.92	0.192	206.076	0.192	469.637	0.192	629	0.192	169.308	0.192	256.061	0.192	140.573	0.192	406.473	0.192	143.678	0.192	258.183	0.192	171.123	0.192	542.026	0.192	183.177	0.192	369.08	0.192	772
					5	0.256	181.908	0.256	1054.12	0.256	1917.37	0.256	221.014	0.256	345.053	0.256	584.575	0.256	654	0.256	169.738	0.256	188.34	0.256	508.932	0.256	551	0.256	174.015	0.256	240.196	0.256	225.831	0.256	373.996	0.256	142.229	0.256	317.396	0.256	210.868	0.256	665.456	0.256	189.382	0.256	240.16	0.256	1233
					6	0.32	183.57	0.32	1775.55	0.32	1934.94	0.32	222.726	0.32	306.68	0.32	750.646	0.32	536	0.32	163.894	0.32	175.528	0.32	485.025	0.32	591.979	0.32	172.034	0.32	269.915	0.32	369.166	0.32	363.01	0.32	140.13	0.32	374.834	0.32	281.016	0.32	852.317	0.32	185.729	0.32	184	0.32	1563
					7	0.384	177.392	0.384	2586.14	0.384	1519.47	0.384	227.97	0.384	303.062	0.384	885.964	0.384	469	0.384	163.728	0.384	166.412	0.384	491.984	0.384	533.533	0.384	170.553	0.384	273.825	0.384	550.024	0.384	359.238	0.384	143.969	0.384	369.308	0.384	391.952	0.384	928.509	0.384	179.812	0.384	206.8	0.384	1733
					8	0.448	174.396	0.448	3269.13	0.448	1041.12	0.448	231.229	0.448	335.701	0.448	982.782	0.448	427	0.448	165.156	0.448	159.605	0.448	519.788	0.448	523.984	0.448	185.324	0.448	269.074	0.448	540.277	0.448	333.079	0.448	136.862	0.448	316.959	0.448	604.918	0.448	797.144	0.448	173.636	0.448	213.16	0.448	1707
					9	0.512	177.275	0.512	3680.95	0.512	793.883	0.512	241.943	0.512	358.072	0.512	1028.94	0.512	441	0.512	158.287	0.512	160.245	0.512	513.894	0.512	548.351	0.512	196.14	0.512	280.1	0.512	399.071	0.512	312.419	0.512	141.388	0.512	259.065	0.512	924.1	0.512	618.39	0.512	172.977	0.512	213.12	0.512	1708
					10	0.576	177.171	0.576	3849.66	0.576	768.49	0.576	244.669	0.576	345.028	0.576	1062.22	0.576	502	0.576	157.14	0.576	166.661	0.576	544.332	0.576	603.332	0.576	192.534	0.576	324.346	0.576	264.511	0.576	280.63	0.576	151.859	0.576	233.68	0.576	1215.29	0.576	523.201	0.576	176.789	0.576	226.48	0.576	1706
					11	0.64	198.19	0.64	3668.38	0.64	760.637	0.64	223.936	0.64	355.273	0.64	1113	0.64	534	0.64	164.254	0.64	169.987	0.64	496.39	0.64	653.964	0.64	182.112	0.64	414.415	0.64	174.469	0.64	271.012	0.64	152.541	0.64	249.331	0.64	1383.77	0.64	465.53	0.64	184.525	0.64	258	0.64	1684
					12	0.704	237.593	0.704	3207.89	0.704	740.093	0.704	212.23	0.704	364.047	0.704	1161.83	0.704	522	0.704	164.748	0.704	178.193	0.704	461.267	0.704	669.224	0.704	176.042	0.704	465.109	0.704	122.827	0.704	309.091	0.704	146.212	0.704	255.852	0.704	1389.66	0.704	374.811	0.704	192.01	0.704	361.12	0.704	1749
					13	0.768	264.584	0.768	2758.77	0.768	715.019	0.768	215.171	0.768	421.795	0.768	1297.13	0.768	479	0.768	164.365	0.768	178.352	0.768	580.908	0.768	693.345	0.768	166.151	0.768	460.528	0.768	98.135	0.768	377.739	0.768	148.939	0.768	268.414	0.768	1228.09	0.768	348.867	0.768	200.701	0.768	452.24	0.768	1618.34
					14	0.832	269.03	0.832	2549.41	0.832	704.485	0.832	221.543	0.832	512.443	0.832	1381.76	0.832	466	0.832	162.461	0.832	177.968	0.832	656.794	0.832	778.655	0.832	169.245	NA	NA	NA	NA	0.832	382.9	0.832	153.787	0.832	315	0.832	957.871	0.832	338.878	0.832	210.065	0.832	513	0.832	1689.11
					15	0.896	270.558	0.896	2495.31	0.896	692.258	0.896	228.004	0.896	541.113	0.896	1368.71	0.896	506	0.896	169.203	0.896	190.276	0.896	618.088	0.896	834.585	0.896	172.531	NA	NA	NA	NA	0.896	403.042	0.896	162.361	NA	NA	0.896	713.031	0.896	339.084	0.896	205.744	0.896	544.72	0.896	1787.09
					16	0.96	269.972	0.96	2533.4	0.96	598.742	0.96	242.891	0.96	529.135	0.96	1342.04	0.96	551	0.96	156.617	0.96	203.284	0.96	591.147	0.96	956.546	0.96	183.082	NA	NA	NA	NA	0.96	428.68	0.96	171.617	NA	NA	0.96	517.141	0.96	353.236	0.96	196.805	0.96	553	0.96	1947.93
					17	1.024	262.494	1.024	2613.57	1.024	525.935	1.024	225.701	1.024	489.81	1.024	1173.47	1.024	569	1.024	162.882	1.024	210.764	1.024	517.579	1.024	954.479	1.024	189.184	NA	NA	NA	NA	1.024	422.743	1.024	173.086	NA	NA	1.024	385.223	1.024	379.913	1.024	202.436	NA	NA	1.024	1973.45
					18	1.088	235.446	1.088	2594.41	1.088	510.901	1.088	226.217	1.088	421.982	1.088	1074.59	1.088	522	1.088	168.204	1.088	197.561	1.088	382.27	1.088	1016.64	1.088	182.471	NA	NA	NA	NA	1.088	382	1.088	164.25	NA	NA	1.088	290.943	1.088	450.109	1.088	204.126	NA	NA	1.088	1638.68
					19	1.152	232.692	1.152	2293.98	1.152	516.57	1.152	230.06	1.152	319.697	1.152	1037.25	1.152	486	1.152	159.631	1.152	188.157	1.152	320.011	1.152	1142.78	1.152	168.232	NA	NA	NA	NA	1.152	353	1.152	164.981	NA	NA	1.152	222.128	1.152	537.464	1.152	188.24	NA	NA	1.152	1051.15
					20	1.216	264.638	1.216	1680.24	1.216	549.801	1.216	213.559	1.216	285.364	1.216	981.387	1.216	420	1.216	151.879	1.216	178.063	1.216	340.225	1.216	1072.74	1.216	170.44	NA	NA	NA	NA	1.216	324	1.216	174.273	NA	NA	NA	NA	1.216	626.116	1.216	194.166	NA	NA	1.216	576.313
					21	1.28	321.082	1.28	983.148	1.28	566.709	1.28	219.213	1.28	325.037	1.28	936.552	1.28	369	1.28	149.648	1.28	172.621	1.28	454.795	1.28	920.262	1.28	177.391	NA	NA	NA	NA	1.28	320.5	1.28	182.211	NA	NA	NA	NA	1.28	633.377	1.28	185.396	NA	NA	1.28	303.211
					22	1.344	378.491	1.344	453.24	1.344	580.679	1.344	225.387	1.344	441.579	1.344	876.63	1.344	342	1.344	150.563	1.344	177.797	1.344	535.08	1.344	775.831	1.344	177.494	NA	NA	NA	NA	1.344	313.5	1.344	193.824	NA	NA	NA	NA	1.344	558.42	1.344	182.628	NA	NA	1.344	168.825
					23	1.408	406.284	1.408	263.72	1.408	559.317	1.408	223.2	1.408	573.225	1.408	773.411	1.408	321	1.408	158.953	1.408	192.778	1.408	549.411	1.408	658.744	1.408	178.741	NA	NA	NA	NA	1.408	288	1.408	180.465	NA	NA	NA	NA	1.408	542.816	1.408	185.065	NA	NA	1.408	117.66
					24	1.472	434.995	NA	NA	1.472	549.894	1.472	223.548	1.472	682.795	1.472	625.734	1.472	322.651	1.472	160.243	1.472	197.967	1.472	521.89	1.472	635.966	1.472	196.956	NA	NA	NA	NA	1.472	282.091	1.472	183.675	NA	NA	NA	NA	1.472	591.073	1.472	188.612	NA	NA	1.472	103.049
					25	1.536	462.532	NA	NA	1.536	584.63	1.536	230.736	1.536	828.131	1.536	442.523	1.536	302.32	1.536	155.933	1.536	201.167	1.536	443.794	1.536	714.823	1.536	185.316	NA	NA	NA	NA	1.536	295.433	1.536	185.306	NA	NA	NA	NA	1.536	623.785	1.536	186.877	NA	NA	1.536	100.365
					26	NA	NA	NA	NA	1.6	712.3	1.6	230.553	1.6	936.966	1.6	272.256	1.6	296.491	1.6	147.87	1.6	194.67	1.6	373.548	1.6	799.479	1.6	167.212	NA	NA	NA	NA	1.6	284.302	1.6	174.451	NA	NA	NA	NA	1.6	612.109	1.6	187.334	NA	NA	1.6	91.821
					27	NA	NA	NA	NA	1.664	840.709	1.664	222.049	1.664	976.652	1.664	148.972	1.664	334.802	1.664	121.995	1.664	173.156	1.664	340.493	1.664	807.024	1.664	171.41	NA	NA	NA	NA	1.664	260.895	1.664	182.345	NA	NA	NA	NA	1.664	618	1.664	194.069	NA	NA	1.664	83.214
					28	NA	NA	NA	NA	1.728	904.367	1.728	199.16	1.728	895.798	NA	NA	1.728	423.824	1.728	121.706	1.728	160.284	1.728	297.956	1.728	640.021	1.728	179.653	NA	NA	NA	NA	1.728	274.671	1.728	199.279	NA	NA	NA	NA	1.728	600.835	1.728	185.947	NA	NA	NA	NA
					29	NA	NA	NA	NA	1.792	960.785	1.792	199.271	1.792	829.195	NA	NA	1.792	528.987	1.792	147.72	1.792	161.877	1.792	235.765	1.792	525.908	1.792	180.046	NA	NA	NA	NA	1.792	276.662	1.792	185.374	NA	NA	NA	NA	1.792	505.871	1.792	184.157	NA	NA	NA	NA
					30	NA	NA	NA	NA	1.856	1074.44	1.856	213.21	1.856	793.208	NA	NA	1.856	599.19	1.856	160	1.856	163.839	1.856	179.499	1.856	509.317	1.856	184.802	NA	NA	NA	NA	1.856	296.737	1.856	173.6	NA	NA	NA	NA	1.856	412.302	1.856	186.931	NA	NA	NA	NA
					31	NA	NA	NA	NA	1.92	1237.83	1.92	201.278	1.92	870.972	NA	NA	1.92	629.197	1.92	152.559	1.92	163.704	1.92	143.457	1.92	520.507	1.92	186.686	NA	NA	NA	NA	1.92	340.484	1.92	180.631	NA	NA	NA	NA	1.92	392.865	1.92	172.066	NA	NA	NA	NA
					32	NA	NA	NA	NA	1.984	1368.02	1.984	202.516	1.984	1059.81	NA	NA	1.984	588.173	1.984	154.978	1.984	169.307	1.984	118.474	1.984	489.824	1.984	171.503	NA	NA	NA	NA	1.984	387.824	1.984	188.321	NA	NA	NA	NA	1.984	401.475	1.984	164.194	NA	NA	NA	NA
					33	NA	NA	NA	NA	2.048	1384.08	2.048	216.232	2.048	1235.92	NA	NA	2.048	508.686	2.048	166.81	NA	NA	NA	NA	2.048	433.516	2.048	152.889	NA	NA	NA	NA	2.048	419.824	2.048	191.841	NA	NA	NA	NA	2.048	396.48	2.048	174.277	NA	NA	NA	NA
					34	NA	NA	NA	NA	2.112	1303.26	2.112	221.651	2.112	1098.6	NA	NA	2.112	475.483	2.112	161.797	NA	NA	NA	NA	2.112	432.198	2.112	164.846	NA	NA	NA	NA	2.112	449.536	2.112	187.431	NA	NA	NA	NA	2.112	392.236	2.112	173.53	NA	NA	NA	NA
					35	NA	NA	NA	NA	2.176	1174.18	2.176	213.255	2.176	889.792	NA	NA	2.176	492.912	2.176	146.455	NA	NA	NA	NA	2.176	491.546	2.176	178.448	NA	NA	NA	NA	2.176	471.391	2.176	178.918	NA	NA	NA	NA	2.176	329.312	2.176	169.231	NA	NA	NA	NA
					36	NA	NA	NA	NA	2.24	1100.11	2.24	202.46	2.24	795.357	NA	NA	2.24	537.995	2.24	144.47	NA	NA	NA	NA	2.24	650.708	2.24	176.925	NA	NA	NA	NA	2.24	435.216	2.24	177.983	NA	NA	NA	NA	2.24	287.196	2.24	168.11	NA	NA	NA	NA
					37	NA	NA	NA	NA	2.304	1098.82	2.304	202.86	2.304	772.771	NA	NA	2.304	564.859	2.304	147.876	NA	NA	NA	NA	2.304	783.917	2.304	174.135	NA	NA	NA	NA	2.304	363.815	2.304	160.963	NA	NA	NA	NA	2.304	316.582	2.304	173.561	NA	NA	NA	NA
					38	NA	NA	NA	NA	2.368	1039.66	2.368	212.691	2.368	751.574	NA	NA	2.368	531.813	2.368	149.26	NA	NA	NA	NA	2.368	788.511	2.368	170.127	NA	NA	NA	NA	2.368	310.16	2.368	181.31	NA	NA	NA	NA	2.368	417.468	2.368	179.836	NA	NA	NA	NA
					39	NA	NA	NA	NA	2.432	974.94	2.432	212.478	2.432	679.813	NA	NA	2.432	468.88	2.432	162.236	NA	NA	NA	NA	2.432	658.7	2.432	166.965	NA	NA	NA	NA	2.432	287.285	2.432	183.486	NA	NA	NA	NA	2.432	474.98	2.432	172.188	NA	NA	NA	NA
					40	NA	NA	NA	NA	2.496	1023.78	2.496	207.571	2.496	610.136	NA	NA	2.496	460.11	2.496	165.51	NA	NA	NA	NA	2.496	474.314	2.496	172.94	NA	NA	NA	NA	2.496	272.265	2.496	190.991	NA	NA	NA	NA	2.496	455.022	2.496	157.314	NA	NA	NA	NA
					41	NA	NA	NA	NA	2.56	1159.9	2.56	199.437	2.56	583.384	NA	NA	2.56	467.78	2.56	167.164	NA	NA	NA	NA	2.56	326.208	2.56	173.013	NA	NA	NA	NA	2.56	253.02	2.56	192.062	NA	NA	NA	NA	2.56	404.485	2.56	163.525	NA	NA	NA	NA
					42	NA	NA	NA	NA	2.624	1156.4	2.624	205.58	2.624	585.12	NA	NA	2.624	475.23	2.624	190.344	NA	NA	NA	NA	2.624	241.771	2.624	179.364	NA	NA	NA	NA	2.624	252.235	2.624	188.424	NA	NA	NA	NA	2.624	375.97	2.624	180.228	NA	NA	NA	NA
					43	NA	NA	NA	NA	2.688	1227.44	2.688	209.345	2.688	619.372	NA	NA	2.688	442.38	2.688	197.333	NA	NA	NA	NA	2.688	215.881	2.688	196.134	NA	NA	NA	NA	2.688	272.838	2.688	190.149	NA	NA	NA	NA	2.688	377.98	2.688	179.25	NA	NA	NA	NA
					44	NA	NA	NA	NA	2.752	1344.24	2.752	200.472	2.752	684.239	NA	NA	2.752	389.97	2.752	198.736	NA	NA	NA	NA	2.752	232.195	2.752	206.711	NA	NA	NA	NA	2.752	309.779	2.752	180.838	NA	NA	NA	NA	2.752	369.09	2.752	175.701	NA	NA	NA	NA
					45	NA	NA	NA	NA	2.816	1204.56	2.816	186.367	2.816	725.047	NA	NA	2.816	335.174	2.816	203.942	NA	NA	NA	NA	2.816	265.166	2.816	200.411	NA	NA	NA	NA	2.816	360.658	2.816	184.543	NA	NA	NA	NA	2.816	327.42	2.816	174.882	NA	NA	NA	NA
					46	NA	NA	NA	NA	2.88	983.209	2.88	185.788	2.88	702.109	NA	NA	2.88	286.842	2.88	201.178	NA	NA	NA	NA	2.88	300.589	2.88	193.592	NA	NA	NA	NA	2.88	418.052	2.88	203.71	NA	NA	NA	NA	2.88	270.57	2.88	172.026	NA	NA	NA	NA
					47	NA	NA	NA	NA	2.944	807.387	2.944	200.523	2.944	664.653	NA	NA	2.944	267.125	2.944	198.619	NA	NA	NA	NA	2.944	335.069	2.944	191.479	NA	NA	NA	NA	2.944	452.966	2.944	191.517	NA	NA	NA	NA	2.944	247.23	2.944	169.868	NA	NA	NA	NA
					48	NA	NA	NA	NA	3.008	669.89	3.008	207.672	3.008	614.265	NA	NA	3.008	299.826	3.008	193.876	NA	NA	NA	NA	3.008	362.75	3.008	184.286	NA	NA	NA	NA	3.008	460.659	3.008	172.725	NA	NA	NA	NA	3.008	268.78	3.008	157.215	NA	NA	NA	NA
					49	NA	NA	NA	NA	3.072	586.097	3.072	213.052	3.072	562.52	NA	NA	3.072	393.892	3.072	191.586	NA	NA	NA	NA	3.072	397.351	3.072	171.061	NA	NA	NA	NA	3.072	479.766	3.072	170.124	NA	NA	NA	NA	3.072	332.36	3.072	153.29	NA	NA	NA	NA
					50	NA	NA	NA	NA	3.136	584.251	3.136	230.244	3.136	597.52	NA	NA	3.136	528.4	3.136	178.609	NA	NA	NA	NA	3.136	500.232	3.136	172.484	NA	NA	NA	NA	3.136	506.841	3.136	181.796	NA	NA	NA	NA	3.136	459.746	3.136	151.059	NA	NA	NA	NA
					51	NA	NA	NA	NA	3.2	663.732	3.2	232.063	3.2	669.56	NA	NA	3.2	661.857	3.2	156.741	NA	NA	NA	NA	3.2	606.742	3.2	187.679	NA	NA	NA	NA	3.2	493.018	3.2	190.084	NA	NA	NA	NA	3.2	632.347	3.2	163.975	NA	NA	NA	NA
					52	NA	NA	NA	NA	3.264	769.4	3.264	229.226	3.264	735.44	NA	NA	3.264	776.96	3.264	156.711	NA	NA	NA	NA	3.264	641.82	3.264	187.663	NA	NA	NA	NA	3.264	413.542	3.264	190.709	NA	NA	NA	NA	3.264	832.172	3.264	173.518	NA	NA	NA	NA
					53	NA	NA	NA	NA	3.328	874.32	3.328	239.728	3.328	773.2	NA	NA	3.328	833.251	3.328	174.578	NA	NA	NA	NA	3.328	607.968	3.328	177.637	NA	NA	NA	NA	3.328	386.391	3.328	195.743	NA	NA	NA	NA	3.328	948.73	3.328	163.98	NA	NA	NA	NA
					54	NA	NA	NA	NA	3.392	918.112	3.392	256.282	3.392	740.48	NA	NA	3.392	799.888	3.392	185.711	NA	NA	NA	NA	3.392	581.218	3.392	171.986	NA	NA	NA	NA	3.392	397.814	3.392	192.722	NA	NA	NA	NA	3.392	914.574	3.392	153.339	NA	NA	NA	NA
					55	NA	NA	NA	NA	3.456	997.743	3.456	254.364	3.456	679	NA	NA	3.456	786.265	3.456	185.559	NA	NA	NA	NA	3.456	543.42	3.456	165.04	NA	NA	NA	NA	3.456	393.952	3.456	186.778	NA	NA	NA	NA	3.456	771.261	3.456	156.348	NA	NA	NA	NA
					56	NA	NA	NA	NA	3.52	1103.55	3.52	244.024	NA	NA	NA	NA	3.52	869.199	3.52	169.29	NA	NA	NA	NA	3.52	491.598	3.52	161.694	NA	NA	NA	NA	3.52	365.393	3.52	187.498	NA	NA	NA	NA	3.52	663.863	3.52	170.97	NA	NA	NA	NA
					57	NA	NA	NA	NA	3.584	1293.34	3.584	237.988	NA	NA	NA	NA	3.584	840.671	3.584	160.628	NA	NA	NA	NA	3.584	419.181	3.584	164.539	NA	NA	NA	NA	3.584	330.726	3.584	174.437	NA	NA	NA	NA	3.584	699.654	3.584	185.67	NA	NA	NA	NA
					58	NA	NA	NA	NA	3.648	1390.29	3.648	233.031	NA	NA	NA	NA	3.648	727.448	3.648	165.29	NA	NA	NA	NA	3.648	372.612	3.648	168.286	NA	NA	NA	NA	3.648	298.983	3.648	157.178	NA	NA	NA	NA	3.648	666.108	3.648	193.004	NA	NA	NA	NA
					59	NA	NA	NA	NA	3.712	1368.32	3.712	223.413	NA	NA	NA	NA	3.712	620.725	3.712	172.122	NA	NA	NA	NA	NA	NA	3.712	184.917	NA	NA	NA	NA	3.712	252.512	3.712	155.878	NA	NA	NA	NA	3.712	627.888	3.712	186.028	NA	NA	NA	NA
					60	NA	NA	NA	NA	3.776	1164.19	3.776	210.171	NA	NA	NA	NA	3.776	528.454	3.776	157.388	NA	NA	NA	NA	NA	NA	3.776	189.742	NA	NA	NA	NA	3.776	224.952	3.776	158.607	NA	NA	NA	NA	3.776	604.423	3.776	186.384	NA	NA	NA	NA
					61	NA	NA	NA	NA	3.84	832.862	3.84	205.189	NA	NA	NA	NA	3.84	500.791	3.84	145.911	NA	NA	NA	NA	NA	NA	3.84	173.305	NA	NA	NA	NA	3.84	221.987	3.84	154.73	NA	NA	NA	NA	3.84	579.118	NA	NA	NA	NA	NA	NA
					62	NA	NA	NA	NA	3.904	601.221	3.904	201.177	NA	NA	NA	NA	3.904	487.794	3.904	154.237	NA	NA	NA	NA	NA	NA	3.904	178.755	NA	NA	NA	NA	3.904	218.706	3.904	149.657	NA	NA	NA	NA	3.904	528.355	NA	NA	NA	NA	NA	NA
					63	NA	NA	NA	NA	3.968	490.262	3.968	198.618	NA	NA	NA	NA	3.968	510.306	3.968	174.154	NA	NA	NA	NA	NA	NA	3.968	196.859	NA	NA	NA	NA	3.968	220.901	3.968	149.243	NA	NA	NA	NA	3.968	479.454	NA	NA	NA	NA	NA	NA
					64	NA	NA	NA	NA	4.032	462.331	4.032	194.156	NA	NA	NA	NA	4.032	519.357	4.032	182.803	NA	NA	NA	NA	NA	NA	4.032	203.683	NA	NA	NA	NA	4.032	215.791	4.032	144.847	NA	NA	NA	NA	4.032	416.27	NA	NA	NA	NA	NA	NA
					65	NA	NA	NA	NA	4.096	542.402	4.096	201.819	NA	NA	NA	NA	4.096	530.505	4.096	170.484	NA	NA	NA	NA	NA	NA	4.096	204.287	NA	NA	NA	NA	4.096	216.221	4.096	141.198	NA	NA	NA	NA	NA	NA	NA	NA	NA	NA	NA	NA
					66	NA	NA	NA	NA	4.16	664.603	4.16	219.775	NA	NA	NA	NA	4.16	964.948	4.16	158.292	NA	NA	NA	NA	NA	NA	4.16	198.427	NA	NA	NA	NA	4.16	228.161	NA	NA	NA	NA	NA	NA	NA	NA	NA	NA	NA	NA	NA	NA
					67	NA	NA	NA	NA	4.224	664.37	4.224	229.955	NA	NA	NA	NA	4.224	849.005	4.224	159.638	NA	NA	NA	NA	NA	NA	4.224	204.94	NA	NA	NA	NA	4.224	208.814	NA	NA	NA	NA	NA	NA	NA	NA	NA	NA	NA	NA	NA	NA
					68	NA	NA	NA	NA	4.288	565.433	4.288	239.755	NA	NA	NA	NA	4.288	721.005	4.288	167.199	NA	NA	NA	NA	NA	NA	4.288	198.516	NA	NA	NA	NA	4.288	211.405	NA	NA	NA	NA	NA	NA	NA	NA	NA	NA	NA	NA	NA	NA
					69	NA	NA	NA	NA	4.352	468.468	4.352	223.976	NA	NA	NA	NA	4.352	615.319	4.352	172.203	NA	NA	NA	NA	NA	NA	4.352	201.857	NA	NA	NA	NA	4.352	252.167	NA	NA	NA	NA	NA	NA	NA	NA	NA	NA	NA	NA	NA	NA
					70	NA	NA	NA	NA	4.416	412.795	4.416	209.806	NA	NA	NA	NA	4.416	510.668	4.416	162.088	NA	NA	NA	NA	NA	NA	4.416	214.788	NA	NA	NA	NA	4.416	255.585	NA	NA	NA	NA	NA	NA	NA	NA	NA	NA	NA	NA	NA	NA
					71	NA	NA	NA	NA	4.48	406.301	4.48	206.684	NA	NA	NA	NA	4.48	436.914	4.48	163.805	NA	NA	NA	NA	NA	NA	4.48	218.878	NA	NA	NA	NA	4.48	249.572	NA	NA	NA	NA	NA	NA	NA	NA	NA	NA	NA	NA	NA	NA
					72	NA	NA	NA	NA	4.544	432.477	4.544	207.875	NA	NA	NA	NA	4.544	455.263	4.544	174.723	NA	NA	NA	NA	NA	NA	4.544	202.605	NA	NA	NA	NA	4.544	248.326	NA	NA	NA	NA	NA	NA	NA	NA	NA	NA	NA	NA	NA	NA
					73	NA	NA	NA	NA	NA	NA	4.608	206.394	NA	NA	NA	NA	4.608	489.623	4.608	179.527	NA	NA	NA	NA	NA	NA	4.608	191.796	NA	NA	NA	NA	4.608	242.414	NA	NA	NA	NA	NA	NA	NA	NA	NA	NA	NA	NA	NA	NA
					74	NA	NA	NA	NA	NA	NA	4.672	200.492	NA	NA	NA	NA	4.672	525.633	4.672	173.188	NA	NA	NA	NA	NA	NA	4.672	193.198	NA	NA	NA	NA	4.672	236.077	NA	NA	NA	NA	NA	NA	NA	NA	NA	NA	NA	NA	NA	NA
					75	NA	NA	NA	NA	NA	NA	4.736	200.114	NA	NA	NA	NA	4.736	523.059	4.736	169.018	NA	NA	NA	NA	NA	NA	4.736	200.822	NA	NA	NA	NA	4.736	232.962	NA	NA	NA	NA	NA	NA	NA	NA	NA	NA	NA	NA	NA	NA
					76	NA	NA	NA	NA	NA	NA	4.8	204.138	NA	NA	NA	NA	NA	NA	4.8	173.627	NA	NA	NA	NA	NA	NA	4.8	200.262	NA	NA	NA	NA	4.8	232.296	NA	NA	NA	NA	NA	NA	NA	NA	NA	NA	NA	NA	NA	NA
					77	NA	NA	NA	NA	NA	NA	4.864	207.019	NA	NA	NA	NA	NA	NA	4.864	176.668	NA	NA	NA	NA	NA	NA	4.864	194.528	NA	NA	NA	NA	4.864	239.496	NA	NA	NA	NA	NA	NA	NA	NA	NA	NA	NA	NA	NA	NA
					78	NA	NA	NA	NA	NA	NA	4.928	204.751	NA	NA	NA	NA	NA	NA	4.928	173.304	NA	NA	NA	NA	NA	NA	4.928	189.374	NA	NA	NA	NA	4.928	274.78	NA	NA	NA	NA	NA	NA	NA	NA	NA	NA	NA	NA	NA	NA
					79	NA	NA	NA	NA	NA	NA	4.992	205.992	NA	NA	NA	NA	NA	NA	4.992	177.71	NA	NA	NA	NA	NA	NA	NA	NA	NA	NA	NA	NA	4.992	349.38	NA	NA	NA	NA	NA	NA	NA	NA	NA	NA	NA	NA	NA	NA
					80	NA	NA	NA	NA	NA	NA	5.056	208.026	NA	NA	NA	NA	NA	NA	5.056	181.039	NA	NA	NA	NA	NA	NA	NA	NA	NA	NA	NA	NA	5.056	402.88	NA	NA	NA	NA	NA	NA	NA	NA	NA	NA	NA	NA	NA	NA
					81	NA	NA	NA	NA	NA	NA	5.12	214.682	NA	NA	NA	NA	NA	NA	5.12	166.566	NA	NA	NA	NA	NA	NA	NA	NA	NA	NA	NA	NA	5.12	414.46	NA	NA	NA	NA	NA	NA	NA	NA	NA	NA	NA	NA	NA	NA
					82	NA	NA	NA	NA	NA	NA	5.184	216.562	NA	NA	NA	NA	NA	NA	5.184	157.804	NA	NA	NA	NA	NA	NA	NA	NA	NA	NA	NA	NA	NA	NA	NA	NA	NA	NA	NA	NA	NA	NA	NA	NA	NA	NA	NA	NA
					83	NA	NA	NA	NA	NA	NA	5.248	201.82	NA	NA	NA	NA	NA	NA	5.248	161.158	NA	NA	NA	NA	NA	NA	NA	NA	NA	NA	NA	NA	NA	NA	NA	NA	NA	NA	NA	NA	NA	NA	NA	NA	NA	NA	NA	NA
					84	NA	NA	NA	NA	NA	NA	5.312	229.262	NA	NA	NA	NA	NA	NA	5.312	165.166	NA	NA	NA	NA	NA	NA	NA	NA	NA	NA	NA	NA	NA	NA	NA	NA	NA	NA	NA	NA	NA	NA	NA	NA	NA	NA	NA	NA
					85	NA	NA	NA	NA	NA	NA	5.376	222.863	NA	NA	NA	NA	NA	NA	5.376	167.377	NA	NA	NA	NA	NA	NA	NA	NA	NA	NA	NA	NA	NA	NA	NA	NA	NA	NA	NA	NA	NA	NA	NA	NA	NA	NA	NA	NA
					86	NA	NA	NA	NA	NA	NA	5.44	236.501	NA	NA	NA	NA	NA	NA	5.44	168.281	NA	NA	NA	NA	NA	NA	NA	NA	NA	NA	NA	NA	NA	NA	NA	NA	NA	NA	NA	NA	NA	NA	NA	NA	NA	NA	NA	NA
					87	NA	NA	NA	NA	NA	NA	5.504	250.258	NA	NA	NA	NA	NA	NA	5.504	164.849	NA	NA	NA	NA	NA	NA	NA	NA	NA	NA	NA	NA	NA	NA	NA	NA	NA	NA	NA	NA	NA	NA	NA	NA	NA	NA	NA	NA
					88	NA	NA	NA	NA	NA	NA	5.568	225.059	NA	NA	NA	NA	NA	NA	5.568	168.931	NA	NA	NA	NA	NA	NA	NA	NA	NA	NA	NA	NA	NA	NA	NA	NA	NA	NA	NA	NA	NA	NA	NA	NA	NA	NA	NA	NA
					89	NA	NA	NA	NA	NA	NA	5.632	218.704	NA	NA	NA	NA	NA	NA	5.632	181.374	NA	NA	NA	NA	NA	NA	NA	NA	NA	NA	NA	NA	NA	NA	NA	NA	NA	NA	NA	NA	NA	NA	NA	NA	NA	NA	NA	NA
					90	NA	NA	NA	NA	NA	NA	5.696	224.178	NA	NA	NA	NA	NA	NA	5.696	181.985	NA	NA	NA	NA	NA	NA	NA	NA	NA	NA	NA	NA	NA	NA	NA	NA	NA	NA	NA	NA	NA	NA	NA	NA	NA	NA	NA	NA
					91	NA	NA	NA	NA	NA	NA	5.76	241.691	NA	NA	NA	NA	NA	NA	5.76	167.011	NA	NA	NA	NA	NA	NA	NA	NA	NA	NA	NA	NA	NA	NA	NA	NA	NA	NA	NA	NA	NA	NA	NA	NA	NA	NA	NA	NA
					92	NA	NA	NA	NA	NA	NA	5.824	261.168	NA	NA	NA	NA	NA	NA	5.824	153.602	NA	NA	NA	NA	NA	NA	NA	NA	NA	NA	NA	NA	NA	NA	NA	NA	NA	NA	NA	NA	NA	NA	NA	NA	NA	NA	NA	NA
					93	NA	NA	NA	NA	NA	NA	5.888	258.603	NA	NA	NA	NA	NA	NA	5.888	148.44	NA	NA	NA	NA	NA	NA	NA	NA	NA	NA	NA	NA	NA	NA	NA	NA	NA	NA	NA	NA	NA	NA	NA	NA	NA	NA	NA	NA
					94	NA	NA	NA	NA	NA	NA	5.952	262.645	NA	NA	NA	NA	NA	NA	5.952	159.406	NA	NA	NA	NA	NA	NA	NA	NA	NA	NA	NA	NA	NA	NA	NA	NA	NA	NA	NA	NA	NA	NA	NA	NA	NA	NA	NA	NA
					95	NA	NA	NA	NA	NA	NA	6.016	272.424	NA	NA	NA	NA	NA	NA	6.016	165.21	NA	NA	NA	NA	NA	NA	NA	NA	NA	NA	NA	NA	NA	NA	NA	NA	NA	NA	NA	NA	NA	NA	NA	NA	NA	NA	NA	NA
					96	NA	NA	NA	NA	NA	NA	6.08	278.588	NA	NA	NA	NA	NA	NA	6.08	159.573	NA	NA	NA	NA	NA	NA	NA	NA	NA	NA	NA	NA	NA	NA	NA	NA	NA	NA	NA	NA	NA	NA	NA	NA	NA	NA	NA	NA
					97	NA	NA	NA	NA	NA	NA	6.144	283.049	NA	NA	NA	NA	NA	NA	6.144	156.705	NA	NA	NA	NA	NA	NA	NA	NA	NA	NA	NA	NA	NA	NA	NA	NA	NA	NA	NA	NA	NA	NA	NA	NA	NA	NA	NA	NA
					98	NA	NA	NA	NA	NA	NA	6.208	281.045	NA	NA	NA	NA	NA	NA	6.208	151.357	NA	NA	NA	NA	NA	NA	NA	NA	NA	NA	NA	NA	NA	NA	NA	NA	NA	NA	NA	NA	NA	NA	NA	NA	NA	NA	NA	NA
					99	NA	NA	NA	NA	NA	NA	6.272	272.023	NA	NA	NA	NA	NA	NA	6.272	146.767	NA	NA	NA	NA	NA	NA	NA	NA	NA	NA	NA	NA	NA	NA	NA	NA	NA	NA	NA	NA	NA	NA	NA	NA	NA	NA	NA	NA
					100	NA	NA	NA	NA	NA	NA	6.336	268.823	NA	NA	NA	NA	NA	NA	6.336	140.262	NA	NA	NA	NA	NA	NA	NA	NA	NA	NA	NA	NA	NA	NA	NA	NA	NA	NA	NA	NA	NA	NA	NA	NA	NA	NA	NA	NA
					101	NA	NA	NA	NA	NA	NA	6.4	278.648	NA	NA	NA	NA	NA	NA	6.4	149.242	NA	NA	NA	NA	NA	NA	NA	NA	NA	NA	NA	NA	NA	NA	NA	NA	NA	NA	NA	NA	NA	NA	NA	NA	NA	NA	NA	NA
					102	NA	NA	NA	NA	NA	NA	6.464	288.808	NA	NA	NA	NA	NA	NA	6.464	170.658	NA	NA	NA	NA	NA	NA	NA	NA	NA	NA	NA	NA	NA	NA	NA	NA	NA	NA	NA	NA	NA	NA	NA	NA	NA	NA	NA	NA
					103	NA	NA	NA	NA	NA	NA	6.528	219.951	NA	NA	NA	NA	NA	NA	6.528	162.215	NA	NA	NA	NA	NA	NA	NA	NA	NA	NA	NA	NA	NA	NA	NA	NA	NA	NA	NA	NA	NA	NA	NA	NA	NA	NA	NA	NA
					104	NA	NA	NA	NA	NA	NA	6.592	225.009	NA	NA	NA	NA	NA	NA	6.592	167.426	NA	NA	NA	NA	NA	NA	NA	NA	NA	NA	NA	NA	NA	NA	NA	NA	NA	NA	NA	NA	NA	NA	NA	NA	NA	NA	NA	NA
					105	NA	NA	NA	NA	NA	NA	6.656	239.987	NA	NA	NA	NA	NA	NA	6.656	161.551	NA	NA	NA	NA	NA	NA	NA	NA	NA	NA	NA	NA	NA	NA	NA	NA	NA	NA	NA	NA	NA	NA	NA	NA	NA	NA	NA	NA
					106	NA	NA	NA	NA	NA	NA	6.72	239.465	NA	NA	NA	NA	NA	NA	6.72	160.984	NA	NA	NA	NA	NA	NA	NA	NA	NA	NA	NA	NA	NA	NA	NA	NA	NA	NA	NA	NA	NA	NA	NA	NA	NA	NA	NA	NA
					107	NA	NA	NA	NA	NA	NA	6.784	211.527	NA	NA	NA	NA	NA	NA	NA	NA	NA	NA	NA	NA	NA	NA	NA	NA	NA	NA	NA	NA	NA	NA	NA	NA	NA	NA	NA	NA	NA	NA	NA	NA	NA	NA	NA	NA
					108	NA	NA	NA	NA	NA	NA	6.848	205.742	NA	NA	NA	NA	NA	NA	NA	NA	NA	NA	NA	NA	NA	NA	NA	NA	NA	NA	NA	NA	NA	NA	NA	NA	NA	NA	NA	NA	NA	NA	NA	NA	NA	NA	NA	NA
					109	NA	NA	NA	NA	NA	NA	6.912	210.534	NA	NA	NA	NA	NA	NA	NA	NA	NA	NA	NA	NA	NA	NA	NA	NA	NA	NA	NA	NA	NA	NA	NA	NA	NA	NA	NA	NA	NA	NA	NA	NA	NA	NA	NA	NA
					110	NA	NA	NA	NA	NA	NA	6.976	231.487	NA	NA	NA	NA	NA	NA	NA	NA	NA	NA	NA	NA	NA	NA	NA	NA	NA	NA	NA	NA	NA	NA	NA	NA	NA	NA	NA	NA	NA	NA	NA	NA	NA	NA	NA	NA
					111	NA	NA	NA	NA	NA	NA	7.04	257.669	NA	NA	NA	NA	NA	NA	NA	NA	NA	NA	NA	NA	NA	NA	NA	NA	NA	NA	NA	NA	NA	NA	NA	NA	NA	NA	NA	NA	NA	NA	NA	NA	NA	NA	NA	NA
					112	NA	NA	NA	NA	NA	NA	7.104	251.73	NA	NA	NA	NA	NA	NA	NA	NA	NA	NA	NA	NA	NA	NA	NA	NA	NA	NA	NA	NA	NA	NA	NA	NA	NA	NA	NA	NA	NA	NA	NA	NA	NA	NA	NA	NA
					113	NA	NA	NA	NA	NA	NA	7.168	234.088	NA	NA	NA	NA	NA	NA	NA	NA	NA	NA	NA	NA	NA	NA	NA	NA	NA	NA	NA	NA	NA	NA	NA	NA	NA	NA	NA	NA	NA	NA	NA	NA	NA	NA	NA	NA
					114	NA	NA	NA	NA	NA	NA	7.232	231.202	NA	NA	NA	NA	NA	NA	NA	NA	NA	NA	NA	NA	NA	NA	NA	NA	NA	NA	NA	NA	NA	NA	NA	NA	NA	NA	NA	NA	NA	NA	NA	NA	NA	NA	NA	NA
					115	NA	NA	NA	NA	NA	NA	7.296	250.729	NA	NA	NA	NA	NA	NA	NA	NA	NA	NA	NA	NA	NA	NA	NA	NA	NA	NA	NA	NA	NA	NA	NA	NA	NA	NA	NA	NA	NA	NA	NA	NA	NA	NA	NA	NA
					116	NA	NA	NA	NA	NA	NA	7.36	251.244	NA	NA	NA	NA	NA	NA	NA	NA	NA	NA	NA	NA	NA	NA	NA	NA	NA	NA	NA	NA	NA	NA	NA	NA	NA	NA	NA	NA	NA	NA	NA	NA	NA	NA	NA	NA
					117	NA	NA	NA	NA	NA	NA	7.424	235.729	NA	NA	NA	NA	NA	NA	NA	NA	NA	NA	NA	NA	NA	NA	NA	NA	NA	NA	NA	NA	NA	NA	NA	NA	NA	NA	NA	NA	NA	NA	NA	NA	NA	NA	NA	NA
					118	NA	NA	NA	NA	NA	NA	7.488	251.672	NA	NA	NA	NA	NA	NA	NA	NA	NA	NA	NA	NA	NA	NA	NA	NA	NA	NA	NA	NA	NA	NA	NA	NA	NA	NA	NA	NA	NA	NA	NA	NA	NA	NA	NA	NA
					119	NA	NA	NA	NA	NA	NA	7.552	261.122	NA	NA	NA	NA	NA	NA	NA	NA	NA	NA	NA	NA	NA	NA	NA	NA	NA	NA	NA	NA	NA	NA	NA	NA	NA	NA	NA	NA	NA	NA	NA	NA	NA	NA	NA	NA
					120	NA	NA	NA	NA	NA	NA	7.616	261.998	NA	NA	NA	NA	NA	NA	NA	NA	NA	NA	NA	NA	NA	NA	NA	NA	NA	NA	NA	NA	NA	NA	NA	NA	NA	NA	NA	NA	NA	NA	NA	NA	NA	NA	NA	NA
					121	NA	NA	NA	NA	NA	NA	7.68	256.307	NA	NA	NA	NA	NA	NA	NA	NA	NA	NA	NA	NA	NA	NA	NA	NA	NA	NA	NA	NA	NA	NA	NA	NA	NA	NA	NA	NA	NA	NA	NA	NA	NA	NA	NA	NA
					122	NA	NA	NA	NA	NA	NA	7.744	246.495	NA	NA	NA	NA	NA	NA	NA	NA	NA	NA	NA	NA	NA	NA	NA	NA	NA	NA	NA	NA	NA	NA	NA	NA	NA	NA	NA	NA	NA	NA	NA	NA	NA	NA	NA	NA
					123	NA	NA	NA	NA	NA	NA	7.808	241.238	NA	NA	NA	NA	NA	NA	NA	NA	NA	NA	NA	NA	NA	NA	NA	NA	NA	NA	NA	NA	NA	NA	NA	NA	NA	NA	NA	NA	NA	NA	NA	NA	NA	NA	NA	NA
					124	NA	NA	NA	NA	NA	NA	7.872	230.219	NA	NA	NA	NA	NA	NA	NA	NA	NA	NA	NA	NA	NA	NA	NA	NA	NA	NA	NA	NA	NA	NA	NA	NA	NA	NA	NA	NA	NA	NA	NA	NA	NA	NA	NA	NA
					125	NA	NA	NA	NA	NA	NA	7.936	227.068	NA	NA	NA	NA	NA	NA	NA	NA	NA	NA	NA	NA	NA	NA	NA	NA	NA	NA	NA	NA	NA	NA	NA	NA	NA	NA	NA	NA	NA	NA	NA	NA	NA	NA	NA	NA
					126	NA	NA	NA	NA	NA	NA	8	230.043	NA	NA	NA	NA	NA	NA	NA	NA	NA	NA	NA	NA	NA	NA	NA	NA	NA	NA	NA	NA	NA	NA	NA	NA	NA	NA	NA	NA	NA	NA	NA	NA	NA	NA	NA	NA
					127	NA	NA	NA	NA	NA	NA	8.064	235.369	NA	NA	NA	NA	NA	NA	NA	NA	NA	NA	NA	NA	NA	NA	NA	NA	NA	NA	NA	NA	NA	NA	NA	NA	NA	NA	NA	NA	NA	NA	NA	NA	NA	NA	NA	NA
					128	NA	NA	NA	NA	NA	NA	8.128	241.698	NA	NA	NA	NA	NA	NA	NA	NA	NA	NA	NA	NA	NA	NA	NA	NA	NA	NA	NA	NA	NA	NA	NA	NA	NA	NA	NA	NA	NA	NA	NA	NA	NA	NA	NA	NA
					129	NA	NA	NA	NA	NA	NA	8.192	233.249	NA	NA	NA	NA	NA	NA	NA	NA	NA	NA	NA	NA	NA	NA	NA	NA	NA	NA	NA	NA	NA	NA	NA	NA	NA	NA	NA	NA	NA	NA	NA	NA	NA	NA	NA	NA
					130	NA	NA	NA	NA	NA	NA	8.256	220.958	NA	NA	NA	NA	NA	NA	NA	NA	NA	NA	NA	NA	NA	NA	NA	NA	NA	NA	NA	NA	NA	NA	NA	NA	NA	NA	NA	NA	NA	NA	NA	NA	NA	NA	NA	NA
					131	NA	NA	NA	NA	NA	NA	NA	NA	NA	NA	NA	NA	NA	NA	NA	NA	NA	NA	NA	NA	NA	NA	NA	NA	NA	NA	NA	NA	NA	NA	NA	NA	NA	NA	NA	NA	NA	NA	NA	NA	NA	NA	NA	NA
					132	NA	NA	NA	NA	NA	NA	NA	NA	NA	NA	NA	NA	NA	NA	NA	NA	NA	NA	NA	NA	NA	NA	NA	NA	NA	NA	NA	NA	NA	NA	NA	NA	NA	NA	NA	NA	NA	NA	NA	NA	NA	NA	NA	NA
					133	NA	NA	NA	NA	NA	NA	NA	NA	NA	NA	NA	NA	NA	NA	NA	NA	NA	NA	NA	NA	NA	NA	NA	NA	NA	NA	NA	NA	NA	NA	NA	NA	NA	NA	NA	NA	NA	NA	NA	NA	NA	NA	NA	NA
					134	NA	NA	NA	NA	NA	NA	NA	NA	NA	NA	NA	NA	NA	NA	NA	NA	NA	NA	NA	NA	NA	NA	NA	NA	NA	NA	NA	NA	NA	NA	NA	NA	NA	NA	NA	NA	NA	NA	NA	NA	NA	NA	NA	NA
					135	NA	NA	NA	NA	NA	NA	NA	NA	NA	NA	NA	NA	NA	NA	NA	NA	NA	NA	NA	NA	NA	NA	NA	NA	NA	NA	NA	NA	NA	NA	NA	NA	NA	NA	NA	NA	NA	NA	NA	NA	NA	NA	NA	NA
					136	NA	NA	NA	NA	NA	NA	NA	NA	NA	NA	NA	NA	NA	NA	NA	NA	NA	NA	NA	NA	NA	NA	NA	NA	NA	NA	NA	NA	NA	NA	NA	NA	NA	NA	NA	NA	NA	NA	NA	NA	NA	NA	NA	NA
					137	NA	NA	NA	NA	NA	NA	NA	NA	NA	NA	NA	NA	NA	NA	NA	NA	NA	NA	NA	NA	NA	NA	NA	NA	NA	NA	NA	NA	NA	NA	NA	NA	NA	NA	NA	NA	NA	NA	NA	NA	NA	NA	NA	NA
					138	NA	NA	NA	NA	NA	NA	NA	NA	NA	NA	NA	NA	NA	NA	NA	NA	NA	NA	NA	NA	NA	NA	NA	NA	NA	NA	NA	NA	NA	NA	NA	NA	NA	NA	NA	NA	NA	NA	NA	NA	NA	NA	NA	NA
					139	NA	NA	NA	NA	NA	NA	NA	NA	NA	NA	NA	NA	NA	NA	NA	NA	NA	NA	NA	NA	NA	NA	NA	NA	NA	NA	NA	NA	NA	NA	NA	NA	NA	NA	NA	NA	NA	NA	NA	NA	NA	NA	NA	NA
					140	NA	NA	NA	NA	NA	NA	NA	NA	NA	NA	NA	NA	NA	NA	NA	NA	NA	NA	NA	NA	NA	NA	NA	NA	NA	NA	NA	NA	NA	NA	NA	NA	NA	NA	NA	NA	NA	NA	NA	NA	NA	NA	NA	NA
					141	NA	NA	NA	NA	NA	NA	NA	NA	NA	NA	NA	NA	NA	NA	NA	NA	NA	NA	NA	NA	NA	NA	NA	NA	NA	NA	NA	NA	NA	NA	NA	NA	NA	NA	NA	NA	NA	NA	NA	NA	NA	NA	NA	NA
					142	NA	NA	NA	NA	NA	NA	NA	NA	NA	NA	NA	NA	NA	NA	NA	NA	NA	NA	NA	NA	NA	NA	NA	NA	NA	NA	NA	NA	NA	NA	NA	NA	NA	NA	NA	NA	NA	NA	NA	NA	NA	NA	NA	NA
					143	NA	NA	NA	NA	NA	NA	NA	NA	NA	NA	NA	NA	NA	NA	NA	NA	NA	NA	NA	NA	NA	NA	NA	NA	NA	NA	NA	NA	NA	NA	NA	NA	NA	NA	NA	NA	NA	NA	NA	NA	NA	NA	NA	NA
					144	NA	NA	NA	NA	NA	NA	NA	NA	NA	NA	NA	NA	NA	NA	NA	NA	NA	NA	NA	NA	NA	NA	NA	NA	NA	NA	NA	NA	NA	NA	NA	NA	NA	NA	NA	NA	NA	NA	NA	NA	NA	NA	NA	NA
					145	NA	NA	NA	NA	NA	NA	NA	NA	NA	NA	NA	NA	NA	NA	NA	NA	NA	NA	NA	NA	NA	NA	NA	NA	NA	NA	NA	NA	NA	NA	NA	NA	NA	NA	NA	NA	NA	NA	NA	NA	NA	NA	NA	NA
					146	NA	NA	NA	NA	NA	NA	NA	NA	NA	NA	NA	NA	NA	NA	NA	NA	NA	NA	NA	NA	NA	NA	NA	NA	NA	NA	NA	NA	NA	NA	NA	NA	NA	NA	NA	NA	NA	NA	NA	NA	NA	NA	NA	NA
					147	NA	NA	NA	NA	NA	NA	NA	NA	NA	NA	NA	NA	NA	NA	NA	NA	NA	NA	NA	NA	NA	NA	NA	NA	NA	NA	NA	NA	NA	NA	NA	NA	NA	NA	NA	NA	NA	NA	NA	NA	NA	NA	NA	NA
					148	NA	NA	NA	NA	NA	NA	NA	NA	NA	NA	NA	NA	NA	NA	NA	NA	NA	NA	NA	NA	NA	NA	NA	NA	NA	NA	NA	NA	NA	NA	NA	NA	NA	NA	NA	NA	NA	NA	NA	NA	NA	NA	NA	NA
					149	NA	NA	NA	NA	NA	NA	NA	NA	NA	NA	NA	NA	NA	NA	NA	NA	NA	NA	NA	NA	NA	NA	NA	NA	NA	NA	NA	NA	NA	NA	NA	NA	NA	NA	NA	NA	NA	NA	NA	NA	NA	NA	NA	NA
					150	NA	NA	NA	NA	NA	NA	NA	NA	NA	NA	NA	NA	NA	NA	NA	NA	NA	NA	NA	NA	NA	NA	NA	NA	NA	NA	NA	NA	NA	NA	NA	NA	NA	NA	NA	NA	NA	NA	NA	NA	NA	NA	NA	NA
					151	NA	NA	NA	NA	NA	NA	NA	NA	NA	NA	NA	NA	NA	NA	NA	NA	NA	NA	NA	NA	NA	NA	NA	NA	NA	NA	NA	NA	NA	NA	NA	NA	NA	NA	NA	NA	NA	NA	NA	NA	NA	NA	NA	NA
					152	NA	NA	NA	NA	NA	NA	NA	NA	NA	NA	NA	NA	NA	NA	NA	NA	NA	NA	NA	NA	NA	NA	NA	NA	NA	NA	NA	NA	NA	NA	NA	NA	NA	NA	NA	NA	NA	NA	NA	NA	NA	NA	NA	NA
					153	NA	NA	NA	NA	NA	NA	NA	NA	NA	NA	NA	NA	NA	NA	NA	NA	NA	NA	NA	NA	NA	NA	NA	NA	NA	NA	NA	NA	NA	NA	NA	NA	NA	NA	NA	NA	NA	NA	NA	NA	NA	NA	NA	NA
[truncated: 164 more columns]

## Sheet: Mtr2
Mtr2-GFP						1								2								3								4								5								6
						Ic				Ir		Ibg		Ic				Ir		Ibg		Ic				Ir		Ibg		Ic				Ir		Ibg		Ic				Ir		Ibg		Ic
							807.669				681.148		257.241		614.56				435.712		250.589		509.841				438.815		207.755		510.239				510.703		226.052		655.44				433.863		188.098		411.095
							550.429								363.971								302.086								284.187								467.342								198.101
	average	median	SEM	n		Relative accumulation (RA)					423.908			Relative accumulation (RA)					185.123			Relative accumulation (RA)					231.06			Relative accumulation (RA)					284.651			Relative accumulation (RA)					245.765			Relative accumulation (RA)
RA:	1.2096	1.07373	0.0797124	58		1.29846								1.96611								1.30739								0.998367								1.90158								1.15481
	p-value
	0.160313
						180531_Mtr2GFP_15365_TR87b1.3_01_01_Crop_1GFP_x_lc	180531_Mtr2GFP_15365_TR87b1.3_01_01_Crop_1GFP_y_lc	180531_Mtr2GFP_15365_TR87b1.3_01_01_Crop_1mCh_x_cap	180531_Mtr2GFP_15365_TR87b1.3_01_01_Crop_1mCh_y_cap	180531_Mtr2GFP_15365_TR87b1.3_01_01_Crop_1GFP_x_lr	180531_Mtr2GFP_15365_TR87b1.3_01_01_Crop_1GFP_y_lr	180531_Mtr2GFP_15365_TR87b1.3_01_01_Crop_1GFP_x_bg	180531_Mtr2GFP_15365_TR87b1.3_01_01_Crop_1GFP_y_bg	180531_Mtr2GFP_15365_TR87b1.3_01_01_Crop_2GFP_x_lc	180531_Mtr2GFP_15365_TR87b1.3_01_01_Crop_2GFP_y_lc	180531_Mtr2GFP_15365_TR87b1.3_01_01_Crop_2mCh_x_cap	180531_Mtr2GFP_15365_TR87b1.3_01_01_Crop_2mCh_y_cap	180531_Mtr2GFP_15365_TR87b1.3_01_01_Crop_2GFP_x_lr	180531_Mtr2GFP_15365_TR87b1.3_01_01_Crop_2GFP_y_lr	180531_Mtr2GFP_15365_TR87b1.3_01_01_Crop_2GFP_x_bg	180531_Mtr2GFP_15365_TR87b1.3_01_01_Crop_2GFP_y_bg	180531_Mtr2GFP_15365_TR87b1.3_01_02_Crop_1GFP_x_lc	180531_Mtr2GFP_15365_TR87b1.3_01_02_Crop_1GFP_y_lc	180531_Mtr2GFP_15365_TR87b1.3_01_02_Crop_1mCh_x_cap	180531_Mtr2GFP_15365_TR87b1.3_01_02_Crop_1mCh_y_cap	180531_Mtr2GFP_15365_TR87b1.3_01_02_Crop_1GFP_x_lr	180531_Mtr2GFP_15365_TR87b1.3_01_02_Crop_1GFP_y_lr	180531_Mtr2GFP_15365_TR87b1.3_01_02_Crop_1GFP_x_bg	180531_Mtr2GFP_15365_TR87b1.3_01_02_Crop_1GFP_y_bg	180531_Mtr2GFP_15365_TR87b1.3_01_03_Crop_1GFP_x_lc	180531_Mtr2GFP_15365_TR87b1.3_01_03_Crop_1GFP_y_lc	180531_Mtr2GFP_15365_TR87b1.3_01_03_Crop_1mCh_x_cap	180531_Mtr2GFP_15365_TR87b1.3_01_03_Crop_1mCh_y_cap	180531_Mtr2GFP_15365_TR87b1.3_01_03_Crop_1GFP_x_lr	180531_Mtr2GFP_15365_TR87b1.3_01_03_Crop_1GFP_y_lr	180531_Mtr2GFP_15365_TR87b1.3_01_03_Crop_1GFP_x_bg	180531_Mtr2GFP_15365_TR87b1.3_01_03_Crop_1GFP_y_bg	180531_Mtr2GFP_15365_TR87b1.3_01_04_Crop_1GFP_x_lc	180531_Mtr2GFP_15365_TR87b1.3_01_04_Crop_1GFP_y_lc	180531_Mtr2GFP_15365_TR87b1.3_01_04_Crop_1mCh_x_cap	180531_Mtr2GFP_15365_TR87b1.3_01_04_Crop_1mCh_y_cap	180531_Mtr2GFP_15365_TR87b1.3_01_04_Crop_1GFP_x_lr	180531_Mtr2GFP_15365_TR87b1.3_01_04_Crop_1GFP_y_lr	180531_Mtr2GFP_15365_TR87b1.3_01_04_Crop_1GFP_x_bg	180531_Mtr2GFP_15365_TR87b1.3_01_04_Crop_1GFP_y_bg	180531_Mtr2GFP_15365_TR87b1.3_01_04_Crop_2GFP_x_lc	180531_Mtr2GFP_15365_TR87b1.3_01_04_Crop_2GFP_y_lc	180531_Mtr2GFP_15365_TR87b1.3_01_04_Crop_2mCh_x_cap	180531_Mtr2GFP_15365_TR87b1.3_01_04_Crop_2mCh_y_cap
					1	0	691	0	800	0	564	0	291	0	503	0	630	0	426	0	240	0	327	0	1429	0	480	0	261	0	244	0	66	0	247	0	239	0	434	0	220	0	315	0	228	0	430	0	490
					2	0.064	650.581	0.064	1768.12	0.064	627.989	0.064	303.328	0.064	583.567	0.064	879.386	0.064	439.332	0.064	240.047	0.064	327.753	0.064	1669.51	0.064	483.405	0.064	262.354	0.064	306.753	0.064	223.763	0.064	305.538	0.064	256.366	0.064	460.073	0.064	566.176	0.064	370	0.064	225.433	0.064	432.185	0.064	654.22
					3	0.128	631.459	0.128	3043.03	0.128	652.149	0.128	309.544	0.128	636.313	0.128	1135.59	0.128	427.777	0.128	247.395	0.128	318.881	0.128	1748.91	0.128	418.107	0.128	253.249	0.128	368.057	0.128	587.443	0.128	420.631	0.128	255.73	0.128	437.849	0.128	1132.01	0.128	447	0.128	230.309	0.128	417.228	0.128	866.326
					4	0.192	639.576	0.192	4090.11	0.192	633.732	0.192	276.266	0.192	665.959	0.192	1433.78	0.192	416.622	0.192	256.15	0.192	311.504	0.192	1853.32	0.192	365.365	0.192	239.279	0.192	431.759	0.192	1155.79	0.192	507.035	0.192	242.61	0.192	366.583	0.192	1831.7	0.192	516	0.192	223.497	0.192	414.306	0.192	1170.65
					5	0.256	667.206	0.256	4506.25	0.256	598.309	0.256	260.39	0.256	672.573	0.256	1718.36	0.256	437.893	0.256	265.566	0.256	327.974	0.256	2028.4	0.256	381.011	0.256	225.202	0.256	472.352	0.256	1641.65	0.256	582.86	0.256	223.388	0.256	304.004	0.256	2541.8	0.256	549	0.256	198.168	0.256	408.214	0.256	1481.38
					6	0.32	681.938	0.32	4558.11	0.32	511.868	0.32	253.772	0.32	636.909	0.32	1908.65	0.32	462.31	0.32	269.501	0.32	370.127	0.32	2123.26	0.32	411.448	0.32	224.597	0.32	498.002	0.32	1979.69	0.32	671.405	0.32	204.116	0.32	274.331	0.32	3199.76	0.32	475.024	0.32	168.174	0.32	429.489	0.32	1824.61
					7	0.384	751.033	0.384	4555.51	0.384	455.619	0.384	244.902	0.384	581.887	0.384	2001.36	0.384	456.086	0.384	262.36	0.384	412.981	0.384	2066.23	0.384	418.145	0.384	228.473	0.384	451.128	0.384	2109.03	0.384	683.045	0.384	193.498	0.384	270.821	0.384	3809.2	0.384	422.334	0.384	168.135	0.384	445.126	0.384	2240.01
					8	0.448	763.228	0.448	4471.17	0.448	433.001	0.448	260.709	0.448	569.611	0.448	2126.7	0.448	415.749	0.448	261.082	0.448	537.643	0.448	1905.61	0.448	401.757	0.448	218.175	0.448	401.341	0.448	2195.81	0.448	699.456	0.448	185.374	0.448	281.225	0.448	4333.63	0.448	423.218	0.448	178.808	0.448	473.72	0.448	2481.28
					9	0.512	821.663	0.512	4544.03	0.512	441.529	0.512	276.683	0.512	621.019	0.512	2189.11	0.512	383.276	0.512	266.112	0.512	676.098	0.512	1687.17	0.512	401.144	0.512	208.309	0.512	378.38	0.512	2281.07	0.512	690.511	0.512	193.192	0.512	323.287	0.512	4788.3	0.512	453.428	0.512	184.24	0.512	524.929	0.512	2528.07
					10	0.576	902.249	0.576	4598.05	0.576	500.504	0.576	280.391	0.576	694.671	0.576	2175.8	0.576	398.952	0.576	267.539	0.576	799.25	0.576	1495.1	0.576	391.326	0.576	206.035	0.576	412.594	0.576	2338.99	0.576	735.235	0.576	206.286	0.576	403.18	0.576	4975.89	0.576	514.27	0.576	191.003	0.576	489.847	0.576	2663.11
					11	0.64	918.084	0.64	4474.14	0.64	559.816	0.64	293.575	0.64	727.348	0.64	1976.3	0.64	431.765	0.64	259.508	0.64	796.374	0.64	1323.4	0.64	387.854	0.64	214.312	0.64	481.28	0.64	2504.58	0.64	773.523	0.64	233.712	0.64	559.463	0.64	4754.53	0.64	596.613	0.64	181.847	0.64	432.571	0.64	2838.15
					12	0.704	948.281	0.704	4154.68	0.704	577.559	0.704	303.69	0.704	725.288	0.704	1547.25	0.704	462.3	0.704	252.655	0.704	810.867	0.704	1124.39	0.704	383.818	0.704	214.127	0.704	481.08	0.704	2632.82	0.704	752.121	0.704	250.114	0.704	687.421	0.704	4156.19	0.704	613.879	0.704	168.404	0.704	406.125	0.704	2916.22
					13	0.768	1015.92	0.768	3648.43	0.768	566.455	0.768	295.642	0.768	651.556	0.768	1010.25	0.768	489.87	0.768	255.726	0.768	916.362	0.768	948.69	0.768	338.835	0.768	218.002	0.768	454.64	0.768	2469.24	0.768	700.758	0.768	258.256	0.768	774.693	0.768	3462.01	0.768	478.413	0.768	171.803	0.768	362.107	0.768	2947.05
					14	0.832	1026.84	0.832	3242.51	0.832	515.404	0.832	271.265	0.832	567.622	0.832	553.3	0.832	517.68	0.832	248.722	0.832	990.715	0.832	756.385	0.832	322.021	0.832	229.267	0.832	476.88	0.832	2267.96	0.832	640.876	0.832	240.511	0.832	819.698	0.832	2864.64	0.832	358.724	0.832	180.717	0.832	357.719	0.832	3041.48
					15	0.896	1059.53	0.896	2974.62	0.896	490.712	0.896	256.554	0.896	548.797	NA	NA	0.896	502.75	0.896	248.562	0.896	922.476	0.896	507.731	0.896	289.281	0.896	207.82	0.896	462.207	0.896	2193.63	0.896	496.113	0.896	223.028	0.896	832.178	0.896	2344.56	0.896	299.405	0.896	177.937	0.896	404.313	0.896	3025.65
					16	0.96	1045.65	0.96	2762.93	0.96	492.94	0.96	247.409	0.96	548.696	NA	NA	0.96	459.12	0.96	260.167	0.96	735.559	NA	NA	0.96	294.124	0.96	190.557	0.96	449.869	0.96	2112.59	0.96	412.904	0.96	213.175	0.96	778.339	0.96	2040.2	0.96	298.602	0.96	179.795	0.96	469.424	0.96	3091.3
					17	1.024	960.206	1.024	2632.81	1.024	503.236	1.024	249.074	1.024	512.707	NA	NA	1.024	457.881	1.024	267.699	1.024	605.573	NA	NA	1.024	338.767	1.024	184.19	1.024	447.51	1.024	2073.25	1.024	364.866	1.024	218.322	1.024	754.493	1.024	1849.37	1.024	327.914	1.024	190.128	1.024	507.469	1.024	2882.91
					18	1.088	857.093	1.088	2461.84	1.088	512.706	1.088	237.047	NA	NA	NA	NA	1.088	452.383	1.088	261.789	1.088	520.635	NA	NA	1.088	430.378	1.088	179.195	1.088	457.161	1.088	2020.04	1.088	360.374	1.088	223.482	1.088	753.598	1.088	1721	1.088	379.669	1.088	197.577	1.088	488.603	1.088	2374.27
					19	1.152	764.294	1.152	2102.78	1.152	566.622	1.152	243.337	NA	NA	NA	NA	1.152	458.976	1.152	245.065	1.152	498.841	NA	NA	1.152	527.256	1.152	182.948	1.152	471.723	1.152	1874.02	1.152	359.317	1.152	230.247	1.152	676.889	1.152	1516.09	1.152	446.438	1.152	190.634	1.152	478.633	1.152	1844.29
					20	1.216	637.99	1.216	1695.09	1.216	623.66	1.216	255.365	NA	NA	NA	NA	1.216	479.888	1.216	231.484	1.216	459.431	NA	NA	1.216	592.412	1.216	192.945	1.216	490.156	1.216	1335.59	1.216	402.262	1.216	245.127	1.216	564.766	1.216	1234.78	1.216	490.593	1.216	182.639	1.216	515.472	1.216	1277.21
					21	1.28	527.241	1.28	1168	1.28	633.189	1.28	273.66	NA	NA	NA	NA	1.28	471.97	1.28	233.449	1.28	389.927	NA	NA	1.28	602.347	1.28	196.941	1.28	514.088	1.28	793.78	1.28	467.092	1.28	240.038	1.28	586.598	1.28	984.231	1.28	476.664	1.28	184.62	1.28	528.301	1.28	729.976
					22	NA	NA	1.344	732.987	1.344	674.32	1.344	289.999	NA	NA	NA	NA	1.344	460.911	1.344	240.078	1.344	357.486	NA	NA	1.344	555.799	1.344	187.609	1.344	528.863	1.344	379.815	1.344	567.96	1.344	227.611	1.344	705.696	1.344	776.091	1.344	460.913	1.344	187.092	1.344	541.712	1.344	377.892
					23	NA	NA	NA	NA	1.408	756.276	1.408	286.989	NA	NA	NA	NA	1.408	473.489	1.408	234.587	1.408	348.674	NA	NA	1.408	485.343	1.408	198.822	1.408	562.692	NA	NA	1.408	666.84	1.408	226.464	1.408	866.227	1.408	653.3	1.408	438.631	1.408	183.277	1.408	550.384	1.408	189.123
					24	NA	NA	NA	NA	1.472	815.487	1.472	285.078	NA	NA	NA	NA	1.472	485.315	1.472	231.435	1.472	325.415	NA	NA	1.472	429.93	1.472	214.628	1.472	600.261	NA	NA	1.472	684.32	1.472	230.951	1.472	1024.81	NA	NA	1.472	422.663	1.472	180.875	1.472	522.25	1.472	91.542
					25	NA	NA	NA	NA	1.536	806.121	1.536	279.246	NA	NA	NA	NA	1.536	498.721	1.536	231.421	1.536	300.754	NA	NA	1.536	441.56	1.536	198.994	1.536	719.215	NA	NA	1.536	639.84	1.536	229.104	1.536	1123.87	NA	NA	1.536	391.721	1.536	181.913	1.536	427.026	NA	NA
					26	NA	NA	NA	NA	1.6	768.942	1.6	275.179	NA	NA	NA	NA	1.6	507.154	1.6	241.421	1.6	309.921	NA	NA	1.6	573.905	1.6	189.219	1.6	840.702	NA	NA	1.6	564.96	1.6	232.956	1.6	1055.07	NA	NA	1.6	422.983	1.6	181.966	1.6	337.657	NA	NA
					27	NA	NA	NA	NA	1.664	714.097	1.664	285.201	NA	NA	NA	NA	1.664	496.709	1.664	253.799	1.664	361.611	NA	NA	1.664	706.219	1.664	197.505	1.664	843.714	NA	NA	1.664	525.64	1.664	230.706	1.664	973.655	NA	NA	1.664	425.648	1.664	184.387	1.664	280.159	NA	NA
					28	NA	NA	NA	NA	1.728	636.999	1.728	283.291	NA	NA	NA	NA	1.728	463.375	1.728	251.648	1.728	421.132	NA	NA	1.728	802.302	1.728	206.559	1.728	843.5	NA	NA	1.728	481.789	1.728	217.867	1.728	916.93	NA	NA	1.728	369.878	1.728	177.447	1.728	260.129	NA	NA
					29	NA	NA	NA	NA	1.792	560.346	1.792	272.161	NA	NA	NA	NA	1.792	421.737	1.792	241.954	1.792	533.42	NA	NA	1.792	813.595	1.792	220.381	1.792	751.198	NA	NA	1.792	406.415	1.792	215.641	1.792	871.775	NA	NA	1.792	357.522	1.792	184.323	1.792	249.395	NA	NA
					30	NA	NA	NA	NA	1.856	509.217	1.856	264.735	NA	NA	NA	NA	1.856	412.799	1.856	242.373	1.856	579.787	NA	NA	1.856	643.5	1.856	213.222	1.856	641.667	NA	NA	1.856	367.592	1.856	237.385	1.856	781.679	NA	NA	1.856	381.398	1.856	197.151	1.856	244.786	NA	NA
					31	NA	NA	NA	NA	1.92	538.49	1.92	240.307	NA	NA	NA	NA	1.92	439.237	1.92	245.659	1.92	557.829	NA	NA	1.92	490.65	1.92	214.268	1.92	566.096	NA	NA	1.92	406.092	1.92	263.52	NA	NA	NA	NA	1.92	379.904	1.92	185.455	1.92	268.795	NA	NA
					32	NA	NA	NA	NA	1.984	560.738	1.984	241.744	NA	NA	NA	NA	1.984	432.483	1.984	245.429	1.984	638.011	NA	NA	1.984	395.638	1.984	216.126	1.984	482.153	NA	NA	1.984	432.693	1.984	244.505	NA	NA	NA	NA	1.984	360.898	1.984	180.356	1.984	302.338	NA	NA
					33	NA	NA	NA	NA	2.048	607.527	2.048	255.305	NA	NA	NA	NA	2.048	391.612	2.048	237.098	2.048	730.716	NA	NA	2.048	368.046	2.048	190.807	2.048	430.297	NA	NA	2.048	435.855	2.048	218.29	NA	NA	NA	NA	2.048	350.304	2.048	192.984	2.048	358.475	NA	NA
					34	NA	NA	NA	NA	2.112	610	2.112	263.389	NA	NA	NA	NA	2.112	374.4	2.112	232.975	2.112	708.141	NA	NA	2.112	386.575	2.112	172.157	2.112	437.468	NA	NA	2.112	436.286	2.112	214.836	NA	NA	NA	NA	2.112	340.561	2.112	201.353	2.112	408.211	NA	NA
					35	NA	NA	NA	NA	2.176	547.475	2.176	262.285	NA	NA	NA	NA	2.176	406.3	2.176	247.186	2.176	640.468	NA	NA	2.176	443.068	2.176	176.639	2.176	459.568	NA	NA	2.176	427.604	2.176	222.77	NA	NA	NA	NA	2.176	319.718	2.176	200.178	2.176	441.335	NA	NA
					36	NA	NA	NA	NA	2.24	542.787	2.24	247.331	NA	NA	NA	NA	2.24	442.4	2.24	260.911	2.24	634.636	NA	NA	2.24	474.189	2.24	181.911	NA	NA	NA	NA	2.24	391.919	2.24	226.853	NA	NA	NA	NA	2.24	310.889	2.24	199.493	2.24	481.747	NA	NA
					37	NA	NA	NA	NA	2.304	518.866	2.304	246.654	NA	NA	NA	NA	2.304	474.8	2.304	256.422	2.304	660.204	NA	NA	2.304	457.912	2.304	183.795	NA	NA	NA	NA	2.304	438.382	2.304	221.46	NA	NA	NA	NA	2.304	339.439	2.304	204.332	2.304	517.86	NA	NA
					38	NA	NA	NA	NA	2.368	620.32	2.368	233.457	NA	NA	NA	NA	2.368	506.8	2.368	250.751	2.368	679.031	NA	NA	2.368	447.14	2.368	188.379	NA	NA	NA	NA	2.368	447.811	2.368	211.131	NA	NA	NA	NA	2.368	344.741	2.368	196.463	2.368	546.695	NA	NA
					39	NA	NA	NA	NA	2.432	778.533	2.432	213.325	NA	NA	NA	NA	2.432	491.89	2.432	248.087	2.432	618.348	NA	NA	2.432	408.443	2.432	196.861	NA	NA	NA	NA	2.432	436.801	2.432	215.104	NA	NA	NA	NA	2.432	355.022	2.432	190.796	2.432	538.57	NA	NA
					40	NA	NA	NA	NA	2.496	901.869	2.496	204.463	NA	NA	NA	NA	2.496	464.257	2.496	270.73	2.496	529.91	NA	NA	2.496	377.319	2.496	201.38	NA	NA	NA	NA	2.496	469.776	2.496	233.137	NA	NA	NA	NA	2.496	411.448	2.496	181.019	2.496	505.178	NA	NA
					41	NA	NA	NA	NA	2.56	1038.43	2.56	197.88	NA	NA	NA	NA	2.56	437.576	2.56	287.737	2.56	430.012	NA	NA	2.56	360.892	2.56	187.479	NA	NA	NA	NA	2.56	483.247	2.56	226.589	NA	NA	NA	NA	2.56	473.008	2.56	181.044	2.56	441.138	NA	NA
					42	NA	NA	NA	NA	2.624	1166.84	2.624	207.292	NA	NA	NA	NA	2.624	454.651	2.624	278.021	2.624	341.857	NA	NA	2.624	346.225	2.624	189.424	NA	NA	NA	NA	2.624	482.173	2.624	208.014	NA	NA	NA	NA	2.624	489.298	2.624	189.395	2.624	337	NA	NA
					43	NA	NA	NA	NA	2.688	1099.85	2.688	230.827	NA	NA	NA	NA	2.688	500.622	2.688	269.12	2.688	291.115	NA	NA	2.688	363.57	2.688	210.241	NA	NA	NA	NA	2.688	453.915	2.688	194.997	NA	NA	NA	NA	2.688	488.861	2.688	176.317	2.688	253.646	NA	NA
					44	NA	NA	NA	NA	2.752	881.737	2.752	244.861	NA	NA	NA	NA	2.752	507.17	2.752	269.899	2.752	264.122	NA	NA	2.752	379.21	2.752	213.78	NA	NA	NA	NA	2.752	424.448	2.752	177.048	NA	NA	NA	NA	2.752	467.009	2.752	162.255	2.752	227.379	NA	NA
					45	NA	NA	NA	NA	2.816	689.276	2.816	248.031	NA	NA	NA	NA	2.816	519.503	2.816	266.859	2.816	245.136	NA	NA	2.816	412.97	2.816	207.376	NA	NA	NA	NA	2.816	404.894	2.816	189.043	NA	NA	NA	NA	2.816	457.614	2.816	171.875	2.816	239.907	NA	NA
					46	NA	NA	NA	NA	2.88	632.434	2.88	239.54	NA	NA	NA	NA	2.88	516.799	2.88	258.297	2.88	247.695	NA	NA	2.88	446.395	2.88	201.323	NA	NA	NA	NA	2.88	437.135	2.88	213.412	NA	NA	NA	NA	2.88	500.982	2.88	178.894	2.88	285.769	NA	NA
					47	NA	NA	NA	NA	2.944	697.144	2.944	223.473	NA	NA	NA	NA	2.944	498.004	2.944	263.972	2.944	260.509	NA	NA	2.944	474.363	2.944	202.428	NA	NA	NA	NA	2.944	518.7	2.944	223.882	NA	NA	NA	NA	2.944	568.076	NA	NA	2.944	344.355	NA	NA
					48	NA	NA	NA	NA	3.008	780.113	3.008	218.135	NA	NA	NA	NA	3.008	461.586	3.008	267.268	3.008	338.552	NA	NA	3.008	474.07	3.008	208.968	NA	NA	NA	NA	3.008	625.86	3.008	233.632	NA	NA	NA	NA	3.008	603.816	NA	NA	3.008	403.417	NA	NA
					49	NA	NA	NA	NA	3.072	733.627	3.072	222.263	NA	NA	NA	NA	3.072	442.186	3.072	259.32	3.072	439.638	NA	NA	3.072	421.685	3.072	202.074	NA	NA	NA	NA	3.072	669.6	3.072	244.336	NA	NA	NA	NA	3.072	620.102	NA	NA	3.072	418.937	NA	NA
					50	NA	NA	NA	NA	3.136	713.458	3.136	229.513	NA	NA	NA	NA	3.136	405.448	3.136	259.292	3.136	548.574	NA	NA	3.136	388.708	3.136	215.414	NA	NA	NA	NA	3.136	632.75	3.136	233.89	NA	NA	NA	NA	3.136	685.84	NA	NA	3.136	404.702	NA	NA
					51	NA	NA	NA	NA	3.2	686.122	3.2	243.723	NA	NA	NA	NA	3.2	376.994	3.2	263.271	3.2	603.201	NA	NA	3.2	395.694	3.2	212.305	NA	NA	NA	NA	3.2	601.66	3.2	233.969	NA	NA	NA	NA	3.2	687.149	NA	NA	NA	NA	NA	NA
					52	NA	NA	NA	NA	3.264	635.537	NA	NA	NA	NA	NA	NA	3.264	372.537	3.264	253.371	NA	NA	NA	NA	3.264	410.889	3.264	215.085	NA	NA	NA	NA	3.264	536.95	3.264	237.718	NA	NA	NA	NA	3.264	540.046	NA	NA	NA	NA	NA	NA
					53	NA	NA	NA	NA	3.328	601.866	NA	NA	NA	NA	NA	NA	3.328	391.788	3.328	239.022	NA	NA	NA	NA	3.328	439.808	3.328	212.2	NA	NA	NA	NA	3.328	443.71	3.328	234.605	NA	NA	NA	NA	3.328	383.177	NA	NA	NA	NA	NA	NA
					54	NA	NA	NA	NA	3.392	587.527	NA	NA	NA	NA	NA	NA	3.392	420.425	3.392	235.959	NA	NA	NA	NA	3.392	494.747	3.392	207.584	NA	NA	NA	NA	3.392	412.98	3.392	242.552	NA	NA	NA	NA	3.392	294.03	NA	NA	NA	NA	NA	NA
					55	NA	NA	NA	NA	3.456	627.644	NA	NA	NA	NA	NA	NA	3.456	458.019	3.456	234.294	NA	NA	NA	NA	3.456	528.545	3.456	213.009	NA	NA	NA	NA	3.456	459.17	3.456	247.637	NA	NA	NA	NA	3.456	286.613	NA	NA	NA	NA	NA	NA
					56	NA	NA	NA	NA	3.52	692.651	NA	NA	NA	NA	NA	NA	3.52	475.498	3.52	233.867	NA	NA	NA	NA	3.52	498.352	3.52	220.746	NA	NA	NA	NA	NA	NA	3.52	243.461	NA	NA	NA	NA	3.52	314.229	NA	NA	NA	NA	NA	NA
					57	NA	NA	NA	NA	3.584	755.102	NA	NA	NA	NA	NA	NA	3.584	465.034	3.584	238.662	NA	NA	NA	NA	3.584	447.992	3.584	220.851	NA	NA	NA	NA	NA	NA	3.584	230.641	NA	NA	NA	NA	NA	NA	NA	NA	NA	NA	NA	NA
					58	NA	NA	NA	NA	3.648	825.805	NA	NA	NA	NA	NA	NA	3.648	473.114	3.648	229.254	NA	NA	NA	NA	3.648	424.048	3.648	217.012	NA	NA	NA	NA	NA	NA	3.648	215.688	NA	NA	NA	NA	NA	NA	NA	NA	NA	NA	NA	NA
					59	NA	NA	NA	NA	3.712	871.752	NA	NA	NA	NA	NA	NA	3.712	462.067	3.712	222.382	NA	NA	NA	NA	3.712	420.122	3.712	210.819	NA	NA	NA	NA	NA	NA	3.712	214.059	NA	NA	NA	NA	NA	NA	NA	NA	NA	NA	NA	NA
					60	NA	NA	NA	NA	3.776	931.319	NA	NA	NA	NA	NA	NA	3.776	459.849	3.776	224.38	NA	NA	NA	NA	3.776	396.344	3.776	210.934	NA	NA	NA	NA	NA	NA	3.776	224.794	NA	NA	NA	NA	NA	NA	NA	NA	NA	NA	NA	NA
					61	NA	NA	NA	NA	3.84	945.895	NA	NA	NA	NA	NA	NA	3.84	442.801	3.84	227.163	NA	NA	NA	NA	3.84	382.089	NA	NA	NA	NA	NA	NA	NA	NA	3.84	237.159	NA	NA	NA	NA	NA	NA	NA	NA	NA	NA	NA	NA
					62	NA	NA	NA	NA	3.904	933.796	NA	NA	NA	NA	NA	NA	3.904	417.631	NA	NA	NA	NA	NA	NA	3.904	420.094	NA	NA	NA	NA	NA	NA	NA	NA	3.904	230.185	NA	NA	NA	NA	NA	NA	NA	NA	NA	NA	NA	NA
					63	NA	NA	NA	NA	3.968	967.558	NA	NA	NA	NA	NA	NA	3.968	421.937	NA	NA	NA	NA	NA	NA	3.968	466.273	NA	NA	NA	NA	NA	NA	NA	NA	3.968	224.247	NA	NA	NA	NA	NA	NA	NA	NA	NA	NA	NA	NA
					64	NA	NA	NA	NA	4.032	1037.09	NA	NA	NA	NA	NA	NA	4.032	437.377	NA	NA	NA	NA	NA	NA	4.032	488.833	NA	NA	NA	NA	NA	NA	NA	NA	4.032	223.714	NA	NA	NA	NA	NA	NA	NA	NA	NA	NA	NA	NA
					65	NA	NA	NA	NA	4.096	1054.08	NA	NA	NA	NA	NA	NA	4.096	428.095	NA	NA	NA	NA	NA	NA	4.096	485.831	NA	NA	NA	NA	NA	NA	NA	NA	4.096	221.385	NA	NA	NA	NA	NA	NA	NA	NA	NA	NA	NA	NA
					66	NA	NA	NA	NA	4.16	903.011	NA	NA	NA	NA	NA	NA	4.16	425.704	NA	NA	NA	NA	NA	NA	4.16	455.19	NA	NA	NA	NA	NA	NA	NA	NA	4.16	224.435	NA	NA	NA	NA	NA	NA	NA	NA	NA	NA	NA	NA
					67	NA	NA	NA	NA	4.224	741.113	NA	NA	NA	NA	NA	NA	4.224	429.099	NA	NA	NA	NA	NA	NA	4.224	415.617	NA	NA	NA	NA	NA	NA	NA	NA	4.224	225.568	NA	NA	NA	NA	NA	NA	NA	NA	NA	NA	NA	NA
					68	NA	NA	NA	NA	4.288	597.113	NA	NA	NA	NA	NA	NA	4.288	434.54	NA	NA	NA	NA	NA	NA	4.288	416.136	NA	NA	NA	NA	NA	NA	NA	NA	4.288	223.071	NA	NA	NA	NA	NA	NA	NA	NA	NA	NA	NA	NA
					69	NA	NA	NA	NA	4.352	477.908	NA	NA	NA	NA	NA	NA	4.352	408.583	NA	NA	NA	NA	NA	NA	4.352	453.248	NA	NA	NA	NA	NA	NA	NA	NA	4.352	221.99	NA	NA	NA	NA	NA	NA	NA	NA	NA	NA	NA	NA
					70	NA	NA	NA	NA	4.416	445.182	NA	NA	NA	NA	NA	NA	4.416	388.288	NA	NA	NA	NA	NA	NA	4.416	451.955	NA	NA	NA	NA	NA	NA	NA	NA	NA	NA	NA	NA	NA	NA	NA	NA	NA	NA	NA	NA	NA	NA
					71	NA	NA	NA	NA	NA	NA	NA	NA	NA	NA	NA	NA	4.48	395.097	NA	NA	NA	NA	NA	NA	4.48	419.599	NA	NA	NA	NA	NA	NA	NA	NA	NA	NA	NA	NA	NA	NA	NA	NA	NA	NA	NA	NA	NA	NA
					72	NA	NA	NA	NA	NA	NA	NA	NA	NA	NA	NA	NA	4.544	380.024	NA	NA	NA	NA	NA	NA	4.544	358.726	NA	NA	NA	NA	NA	NA	NA	NA	NA	NA	NA	NA	NA	NA	NA	NA	NA	NA	NA	NA	NA	NA
					73	NA	NA	NA	NA	NA	NA	NA	NA	NA	NA	NA	NA	4.608	350.704	NA	NA	NA	NA	NA	NA	4.608	309.9	NA	NA	NA	NA	NA	NA	NA	NA	NA	NA	NA	NA	NA	NA	NA	NA	NA	NA	NA	NA	NA	NA
					74	NA	NA	NA	NA	NA	NA	NA	NA	NA	NA	NA	NA	4.672	338.627	NA	NA	NA	NA	NA	NA	4.672	325.849	NA	NA	NA	NA	NA	NA	NA	NA	NA	NA	NA	NA	NA	NA	NA	NA	NA	NA	NA	NA	NA	NA
					75	NA	NA	NA	NA	NA	NA	NA	NA	NA	NA	NA	NA	4.736	330.573	NA	NA	NA	NA	NA	NA	4.736	372.077	NA	NA	NA	NA	NA	NA	NA	NA	NA	NA	NA	NA	NA	NA	NA	NA	NA	NA	NA	NA	NA	NA
					76	NA	NA	NA	NA	NA	NA	NA	NA	NA	NA	NA	NA	4.8	321.976	NA	NA	NA	NA	NA	NA	4.8	392.991	NA	NA	NA	NA	NA	NA	NA	NA	NA	NA	NA	NA	NA	NA	NA	NA	NA	NA	NA	NA	NA	NA
					77	NA	NA	NA	NA	NA	NA	NA	NA	NA	NA	NA	NA	4.864	322.024	NA	NA	NA	NA	NA	NA	4.864	409.892	NA	NA	NA	NA	NA	NA	NA	NA	NA	NA	NA	NA	NA	NA	NA	NA	NA	NA	NA	NA	NA	NA
					78	NA	NA	NA	NA	NA	NA	NA	NA	NA	NA	NA	NA	4.928	327.629	NA	NA	NA	NA	NA	NA	4.928	432.224	NA	NA	NA	NA	NA	NA	NA	NA	NA	NA	NA	NA	NA	NA	NA	NA	NA	NA	NA	NA	NA	NA
					79	NA	NA	NA	NA	NA	NA	NA	NA	NA	NA	NA	NA	4.992	331.419	NA	NA	NA	NA	NA	NA	4.992	377.712	NA	NA	NA	NA	NA	NA	NA	NA	NA	NA	NA	NA	NA	NA	NA	NA	NA	NA	NA	NA	NA	NA
					80	NA	NA	NA	NA	NA	NA	NA	NA	NA	NA	NA	NA	5.056	332.986	NA	NA	NA	NA	NA	NA	5.056	330.017	NA	NA	NA	NA	NA	NA	NA	NA	NA	NA	NA	NA	NA	NA	NA	NA	NA	NA	NA	NA	NA	NA
					81	NA	NA	NA	NA	NA	NA	NA	NA	NA	NA	NA	NA	NA	NA	NA	NA	NA	NA	NA	NA	5.12	362.341	NA	NA	NA	NA	NA	NA	NA	NA	NA	NA	NA	NA	NA	NA	NA	NA	NA	NA	NA	NA	NA	NA
					82	NA	NA	NA	NA	NA	NA	NA	NA	NA	NA	NA	NA	NA	NA	NA	NA	NA	NA	NA	NA	5.184	460.234	NA	NA	NA	NA	NA	NA	NA	NA	NA	NA	NA	NA	NA	NA	NA	NA	NA	NA	NA	NA	NA	NA
					83	NA	NA	NA	NA	NA	NA	NA	NA	NA	NA	NA	NA	NA	NA	NA	NA	NA	NA	NA	NA	5.248	550.229	NA	NA	NA	NA	NA	NA	NA	NA	NA	NA	NA	NA	NA	NA	NA	NA	NA	NA	NA	NA	NA	NA
					84	NA	NA	NA	NA	NA	NA	NA	NA	NA	NA	NA	NA	NA	NA	NA	NA	NA	NA	NA	NA	NA	NA	NA	NA	NA	NA	NA	NA	NA	NA	NA	NA	NA	NA	NA	NA	NA	NA	NA	NA	NA	NA	NA	NA
					85	NA	NA	NA	NA	NA	NA	NA	NA	NA	NA	NA	NA	NA	NA	NA	NA	NA	NA	NA	NA	NA	NA	NA	NA	NA	NA	NA	NA	NA	NA	NA	NA	NA	NA	NA	NA	NA	NA	NA	NA	NA	NA	NA	NA
					86	NA	NA	NA	NA	NA	NA	NA	NA	NA	NA	NA	NA	NA	NA	NA	NA	NA	NA	NA	NA	NA	NA	NA	NA	NA	NA	NA	NA	NA	NA	NA	NA	NA	NA	NA	NA	NA	NA	NA	NA	NA	NA	NA	NA
					87	NA	NA	NA	NA	NA	NA	NA	NA	NA	NA	NA	NA	NA	NA	NA	NA	NA	NA	NA	NA	NA	NA	NA	NA	NA	NA	NA	NA	NA	NA	NA	NA	NA	NA	NA	NA	NA	NA	NA	NA	NA	NA	NA	NA
					88	NA	NA	NA	NA	NA	NA	NA	NA	NA	NA	NA	NA	NA	NA	NA	NA	NA	NA	NA	NA	NA	NA	NA	NA	NA	NA	NA	NA	NA	NA	NA	NA	NA	NA	NA	NA	NA	NA	NA	NA	NA	NA	NA	NA
					89	NA	NA	NA	NA	NA	NA	NA	NA	NA	NA	NA	NA	NA	NA	NA	NA	NA	NA	NA	NA	NA	NA	NA	NA	NA	NA	NA	NA	NA	NA	NA	NA	NA	NA	NA	NA	NA	NA	NA	NA	NA	NA	NA	NA
					90	NA	NA	NA	NA	NA	NA	NA	NA	NA	NA	NA	NA	NA	NA	NA	NA	NA	NA	NA	NA	NA	NA	NA	NA	NA	NA	NA	NA	NA	NA	NA	NA	NA	NA	NA	NA	NA	NA	NA	NA	NA	NA	NA	NA
					91	NA	NA	NA	NA	NA	NA	NA	NA	NA	NA	NA	NA	NA	NA	NA	NA	NA	NA	NA	NA	NA	NA	NA	NA	NA	NA	NA	NA	NA	NA	NA	NA	NA	NA	NA	NA	NA	NA	NA	NA	NA	NA	NA	NA
					92	NA	NA	NA	NA	NA	NA	NA	NA	NA	NA	NA	NA	NA	NA	NA	NA	NA	NA	NA	NA	NA	NA	NA	NA	NA	NA	NA	NA	NA	NA	NA	NA	NA	NA	NA	NA	NA	NA	NA	NA	NA	NA	NA	NA
					93	NA	NA	NA	NA	NA	NA	NA	NA	NA	NA	NA	NA	NA	NA	NA	NA	NA	NA	NA	NA	NA	NA	NA	NA	NA	NA	NA	NA	NA	NA	NA	NA	NA	NA	NA	NA	NA	NA	NA	NA	NA	NA	NA	NA
					94	NA	NA	NA	NA	NA	NA	NA	NA	NA	NA	NA	NA	NA	NA	NA	NA	NA	NA	NA	NA	NA	NA	NA	NA	NA	NA	NA	NA	NA	NA	NA	NA	NA	NA	NA	NA	NA	NA	NA	NA	NA	NA	NA	NA
					95	NA	NA	NA	NA	NA	NA	NA	NA	NA	NA	NA	NA	NA	NA	NA	NA	NA	NA	NA	NA	NA	NA	NA	NA	NA	NA	NA	NA	NA	NA	NA	NA	NA	NA	NA	NA	NA	NA	NA	NA	NA	NA	NA	NA
					96	NA	NA	NA	NA	NA	NA	NA	NA	NA	NA	NA	NA	NA	NA	NA	NA	NA	NA	NA	NA	NA	NA	NA	NA	NA	NA	NA	NA	NA	NA	NA	NA	NA	NA	NA	NA	NA	NA	NA	NA	NA	NA	NA	NA
					97	NA	NA	NA	NA	NA	NA	NA	NA	NA	NA	NA	NA	NA	NA	NA	NA	NA	NA	NA	NA	NA	NA	NA	NA	NA	NA	NA	NA	NA	NA	NA	NA	NA	NA	NA	NA	NA	NA	NA	NA	NA	NA	NA	NA
					98	NA	NA	NA	NA	NA	NA	NA	NA	NA	NA	NA	NA	NA	NA	NA	NA	NA	NA	NA	NA	NA	NA	NA	NA	NA	NA	NA	NA	NA	NA	NA	NA	NA	NA	NA	NA	NA	NA	NA	NA	NA	NA	NA	NA
					99	NA	NA	NA	NA	NA	NA	NA	NA	NA	NA	NA	NA	NA	NA	NA	NA	NA	NA	NA	NA	NA	NA	NA	NA	NA	NA	NA	NA	NA	NA	NA	NA	NA	NA	NA	NA	NA	NA	NA	NA	NA	NA	NA	NA
[truncated: 500 more columns]

## Sheet: Crm1
Crm1-GFP						1								2								3								4								5								6
						Ic				Ir		Ibg		Ic				Ir		Ibg		Ic				Ir		Ibg		Ic				Ir		Ibg		Ic				Ir		Ibg		Ic
							1007.85				713.035		129.412		991.414				400.222		149.998		450.303				488.286		168.507		1005.62				718.458		153.609		840.938				507.375		173.91		567.599
							878.443								841.415								281.795								852.014								667.028								415.251
	average	median	SEM	n		Relative accumulation (RA)					583.623			Relative accumulation (RA)					250.224			Relative accumulation (RA)					319.779			Relative accumulation (RA)					564.849			Relative accumulation (RA)					333.465			Relative accumulation (RA)
RA:	2.95594	3.07983	0.257298	34		1.50515								3.36265								0.88122								1.50839								2.0003								2.25992
	p-value
	7.99573e-08
						180530_15370_Crm1_01_02_Crop_1GFP_x_lc	180530_15370_Crm1_01_02_Crop_1GFP_y_lc	180530_15370_Crm1_01_02_Crop_1mCh_x_cap	180530_15370_Crm1_01_02_Crop_1mCh_y_cap	180530_15370_Crm1_01_02_Crop_1GFP_x_lr	180530_15370_Crm1_01_02_Crop_1GFP_y_lr	180530_15370_Crm1_01_02_Crop_1GFP_x_bg	180530_15370_Crm1_01_02_Crop_1GFP_y_bg	180530_15370_Crm1_01_02_Crop_2GFP_x_lc	180530_15370_Crm1_01_02_Crop_2GFP_y_lc	180530_15370_Crm1_01_02_Crop_2mCh_x_cap	180530_15370_Crm1_01_02_Crop_2mCh_y_cap	180530_15370_Crm1_01_02_Crop_2GFP_x_lr	180530_15370_Crm1_01_02_Crop_2GFP_y_lr	180530_15370_Crm1_01_02_Crop_2GFP_x_bg	180530_15370_Crm1_01_02_Crop_2GFP_y_bg	180530_15370_Crm1_01_02_Crop_3GFP_x_lc	180530_15370_Crm1_01_02_Crop_3GFP_y_lc	180530_15370_Crm1_01_02_Crop_3mCh_x_cap	180530_15370_Crm1_01_02_Crop_3mCh_y_cap	180530_15370_Crm1_01_02_Crop_3GFP_x_lr	180530_15370_Crm1_01_02_Crop_3GFP_y_lr	180530_15370_Crm1_01_02_Crop_3GFP_x_bg	180530_15370_Crm1_01_02_Crop_3GFP_y_bg	180530_15370_Crm1_01_04_Crop_1GFP_x_lc	180530_15370_Crm1_01_04_Crop_1GFP_y_lc	180530_15370_Crm1_01_04_Crop_1mCh_x_cap	180530_15370_Crm1_01_04_Crop_1mCh_y_cap	180530_15370_Crm1_01_04_Crop_1GFP_x_lr	180530_15370_Crm1_01_04_Crop_1GFP_y_lr	180530_15370_Crm1_01_04_Crop_1GFP_x_bg	180530_15370_Crm1_01_04_Crop_1GFP_y_bg	180530_15370_Crm1_01_04_Crop_2GFP_x_lc	180530_15370_Crm1_01_04_Crop_2GFP_y_lc	180530_15370_Crm1_01_04_Crop_2mCh_x_cap	180530_15370_Crm1_01_04_Crop_2mCh_y_cap	180530_15370_Crm1_01_04_Crop_2GFP_x_lr	180530_15370_Crm1_01_04_Crop_2GFP_y_lr	180530_15370_Crm1_01_04_Crop_2GFP_x_bg	180530_15370_Crm1_01_04_Crop_2GFP_y_bg	180530_15370_Crm1_01_04_Crop_4GFP_x_lc	180530_15370_Crm1_01_04_Crop_4GFP_y_lc	180530_15370_Crm1_01_04_Crop_4mCh_x_cap	180530_15370_Crm1_01_04_Crop_4mCh_y_cap
					1	0	1141	0	308	0	980	0	138	0	581	0	898	0	460	0	151	0	317	0	99	0	336	0	133	0	1359	0	43	0	633	0	186	0	2181	0	90	0	668	0	178	0	428	0	118
					2	0.064	1259.92	0.064	643.926	0.064	1132.43	0.064	132.081	0.064	595.219	0.064	1144.48	0.064	444.37	0.064	152.153	0.064	272.466	0.064	109.217	0.064	335.127	0.064	145.476	0.064	1492.94	0.064	38.554	0.064	638.042	0.064	178.372	0.064	3129.07	0.064	84.14	0.064	631.915	0.064	182.3	0.064	469.116	0.064	108
					3	0.128	1364.79	0.128	1063.53	0.128	1427.86	0.128	140.757	0.128	624.85	0.128	1307.45	0.128	432.504	0.128	141.426	0.128	266.769	0.128	153.657	0.128	324.823	0.128	150.944	0.128	1734.45	0.128	33.23	0.128	663.193	0.128	182.809	0.128	3280.79	0.128	83.261	0.128	613.161	0.128	170.354	0.128	521.787	0.128	109
					4	0.192	1337.04	0.192	1397.75	0.192	1995.19	0.192	135.78	0.192	703.264	0.192	1217.62	0.192	429.86	0.192	136.79	0.192	288.705	0.192	204.21	0.192	319.573	0.192	157.2	0.192	1804.77	0.192	24.275	0.192	714.936	0.192	178.756	0.192	2350.19	0.192	96.167	0.192	605.472	0.192	159.467	0.192	552.346	0.192	119
					5	0.256	1201.41	0.256	1618.1	0.256	2387.86	0.256	134.774	0.256	889.021	0.256	1060.65	0.256	421.679	0.256	132.72	0.256	344.433	0.256	264.391	0.256	315.764	0.256	168.059	0.256	1721.02	0.256	19.459	0.256	746.003	0.256	180.906	0.256	1316.14	0.256	117.251	0.256	597.829	0.256	158.328	0.256	574.151	0.256	145
					6	0.32	1139.1	0.32	1711.06	0.32	2340.21	0.32	125.267	0.32	1148.71	0.32	873.742	0.32	390.564	0.32	123.83	0.32	385.939	0.32	372.911	0.32	282.137	0.32	172.136	0.32	1541.97	0.32	15.062	0.32	724.782	0.32	186.181	0.32	722.726	0.32	150.49	0.32	606.938	0.32	177.427	0.32	597.79	0.32	175
					7	0.384	1094.47	0.384	1775.96	0.384	2411.21	0.384	115.886	0.384	1357.7	0.384	665.909	0.384	357.635	0.384	125.445	0.384	438.46	0.384	599.08	0.384	258.361	0.384	170.094	0.384	1269	0.384	14.6	0.384	642.842	0.384	176.544	0.384	467.385	0.384	184.966	0.384	587.068	0.384	189.272	0.384	724.299	0.384	215
					8	0.448	1029.29	0.448	1760.96	0.448	1922.32	0.448	110.067	0.448	1393.13	0.448	527.753	0.448	300.098	0.448	133.771	0.448	470.56	0.448	1037.35	0.448	281.588	0.448	173.121	0.448	1028.71	0.448	15.46	0.448	610.151	0.448	160.978	0.448	422.32	0.448	224.266	0.448	562.253	0.448	160.94	0.448	767.591	0.448	232
					9	0.512	887.201	0.512	1664.79	0.512	1322.14	0.512	115.2	0.512	1281	0.512	436.434	0.512	243.82	0.512	142.971	0.512	486.96	0.512	1483.92	0.512	327.951	0.512	185.241	0.512	868.745	0.512	17.872	0.512	593.063	0.512	156.493	0.512	427.92	0.512	270.249	0.512	570.52	0.512	147.608	0.512	780.385	0.512	185.28
					10	0.576	704.825	0.576	1546.91	0.576	1138.75	0.576	127.532	0.576	1234.75	0.576	442.038	0.576	217.343	0.576	141.263	0.576	476.145	0.576	1823.41	0.576	354.932	0.576	188.873	0.576	864.241	0.576	21.466	0.576	574.222	0.576	173	0.576	466.457	0.576	318.045	0.576	567.092	0.576	142.136	0.576	836.31	0.576	156.4
					11	0.64	538.711	0.64	1457.87	0.64	1210.95	0.64	140.293	0.64	1283.28	0.64	483.042	0.64	218.276	0.64	132.338	0.64	486.041	0.64	1967.67	0.64	391.02	0.64	160.068	0.64	903.725	0.64	25.385	0.64	542.749	0.64	170.621	0.64	535.189	0.64	389.118	0.64	614.546	0.64	130.989	0.64	901.412	0.64	135.84
					12	0.704	423.709	0.704	1410.77	0.704	1410.87	0.704	156.41	0.704	1220.01	0.704	620.664	0.704	234.709	0.704	131.406	0.704	515.504	0.704	1742.96	0.704	422.122	0.704	150.622	0.704	953.144	0.704	36.839	0.704	523.248	0.704	158.794	0.704	547.599	0.704	445.263	0.704	615.039	0.704	137.407	0.704	961.083	0.704	128
					13	0.768	344.336	0.768	1335.43	0.768	1567.54	0.768	145.711	0.768	908.536	0.768	755.408	0.768	245.213	0.768	135.865	0.768	554.948	0.768	1274.25	0.768	411.529	0.768	152.761	0.768	973.579	0.768	49.689	0.768	547.391	0.768	158.985	0.768	526.194	0.768	451.529	0.768	629.836	0.768	152.027	0.768	974.324	NA	NA
					14	0.832	365.28	0.832	1240.69	0.832	1582.64	0.832	119.256	0.832	659.328	0.832	810.167	0.832	243.164	0.832	144.412	0.832	567.892	0.832	847.057	0.832	431.482	0.832	162.095	0.832	869.846	0.832	58.752	0.832	584.986	0.832	148.414	0.832	500.214	0.832	440.339	0.832	690.707	0.832	151.343	0.832	945.378	NA	NA
					15	0.896	429.05	0.896	1084.81	0.896	1474.74	0.896	114.588	NA	NA	NA	NA	0.896	222.874	0.896	152.837	0.896	516.181	0.896	514.889	0.896	474.673	0.896	165.953	0.896	737.739	0.896	60.813	0.896	626.564	0.896	146.506	0.896	459.437	0.896	503.157	0.896	786.625	0.896	150.959	0.896	869.671	NA	NA
					16	0.96	515.39	0.96	757.825	0.96	1217.38	0.96	118.951	NA	NA	NA	NA	0.96	215.082	0.96	152.995	0.96	428.5	0.96	292.189	0.96	494.973	0.96	167.86	0.96	691.752	0.96	65.191	0.96	702.179	0.96	145.162	0.96	402.291	0.96	518.837	0.96	763.706	0.96	160.023	0.96	721.568	NA	NA
					17	1.024	641.19	1.024	414.823	1.024	937.3	1.024	118.534	NA	NA	NA	NA	1.024	226.321	1.024	146.947	1.024	483.737	1.024	266.566	1.024	519.007	1.024	173.2	1.024	754.537	1.024	64.415	1.024	682.665	1.024	145.977	1.024	358.527	1.024	475.048	1.024	729.81	1.024	150.405	1.024	581.34	NA	NA
					18	1.088	821.54	NA	NA	1.088	713.58	1.088	119.256	NA	NA	NA	NA	1.088	245.546	1.088	145.539	1.088	534.023	1.088	243.572	1.088	513.639	1.088	160.386	1.088	866.435	1.088	66.009	1.088	725.066	1.088	134.757	1.088	338.758	1.088	386.82	1.088	711.663	1.088	144.788	1.088	451.939	NA	NA
					19	1.152	1048.16	NA	NA	1.152	585.26	1.152	110.741	NA	NA	NA	NA	1.152	281.737	1.152	143.352	1.152	578.539	1.152	206.279	1.152	383.803	1.152	144.31	1.152	1006.32	1.152	71.858	1.152	778.306	1.152	120.972	1.152	330.29	1.152	324.996	1.152	693.136	1.152	140.552	1.152	388.756	NA	NA
					20	1.216	1105.44	NA	NA	1.216	569.242	1.216	101.783	NA	NA	NA	NA	1.216	337.896	1.216	148.815	1.216	593.25	1.216	170.059	1.216	290.833	1.216	148.693	1.216	1206.05	1.216	88.614	1.216	779.963	1.216	137.374	1.216	355.401	1.216	254.988	1.216	695.664	1.216	129.423	1.216	328.238	NA	NA
					21	1.28	1418.4	NA	NA	1.28	633.3	1.28	102.821	NA	NA	NA	NA	1.28	366.189	1.28	161.937	NA	NA	NA	NA	1.28	260.503	1.28	161.539	1.28	1411.2	1.28	109.049	1.28	769.1	1.28	164.916	1.28	383.966	1.28	187.706	1.28	689.555	1.28	125.647	1.28	265.162	NA	NA
					22	1.344	1623.28	NA	NA	1.344	676.815	1.344	110.074	NA	NA	NA	NA	1.344	386.917	1.344	165.877	NA	NA	NA	NA	1.344	281.333	1.344	157.607	1.344	1481.53	1.344	125.112	1.344	746.332	1.344	147.593	1.344	430.787	1.344	152.439	1.344	711.963	1.344	133.653	1.344	247.236	NA	NA
					23	1.408	1663.99	NA	NA	1.408	716.837	1.408	112.498	NA	NA	NA	NA	1.408	396.98	1.408	153.2	NA	NA	NA	NA	1.408	314.671	1.408	172.711	1.408	1462.73	1.408	136.938	1.408	758.493	1.408	128.484	1.408	463.371	1.408	147.749	1.408	743.694	1.408	135.039	1.408	245.448	NA	NA
					24	1.472	1601.93	NA	NA	1.472	697.291	1.472	115.259	NA	NA	NA	NA	1.472	430.762	1.472	140.969	NA	NA	NA	NA	1.472	295.826	1.472	184.435	1.472	1325.93	1.472	139.704	1.472	778.197	1.472	131.949	1.472	491.578	1.472	148.346	1.472	738.397	1.472	142.136	1.472	251	NA	NA
					25	1.536	1496.91	NA	NA	1.536	648.205	1.536	117.279	NA	NA	NA	NA	1.536	549.152	1.536	146.666	NA	NA	NA	NA	1.536	300.918	1.536	176.154	1.536	1099.83	1.536	126.076	1.536	762.526	1.536	127.056	1.536	545.173	1.536	147.236	1.536	695.545	1.536	151.282	1.536	269.109	NA	NA
					26	NA	NA	NA	NA	1.6	636.212	1.6	125.201	NA	NA	NA	NA	1.6	713.791	1.6	144.672	NA	NA	NA	NA	1.6	344.405	1.6	170.031	1.6	1004.44	1.6	105.957	1.6	730.556	1.6	121.112	1.6	606.194	1.6	139.506	1.6	569.407	1.6	151.673	1.6	280.28	NA	NA
					27	NA	NA	NA	NA	1.664	566.526	1.664	138.73	NA	NA	NA	NA	1.664	725.684	1.664	147.161	NA	NA	NA	NA	1.664	400.319	1.664	168.673	1.664	903.389	1.664	96.564	1.664	706.866	1.664	122.042	1.664	666.351	1.664	132.96	1.664	503.044	1.664	143.759	1.664	296.432	NA	NA
					28	NA	NA	NA	NA	1.728	530.282	1.728	135.704	NA	NA	NA	NA	1.728	633.164	1.728	161.981	NA	NA	NA	NA	1.728	493	1.728	180.742	1.728	810.939	1.728	91.379	1.728	744.465	1.728	125.066	NA	NA	NA	NA	1.728	444.269	1.728	152.765	1.728	325.922	NA	NA
					29	NA	NA	NA	NA	1.792	504.21	1.792	122.327	NA	NA	NA	NA	1.792	558.034	1.792	158.004	NA	NA	NA	NA	1.792	487.114	1.792	186.182	1.792	680.424	1.792	92.573	1.792	797.225	1.792	130.31	NA	NA	NA	NA	1.792	377.545	1.792	157.746	1.792	365.307	NA	NA
					30	NA	NA	NA	NA	1.856	492.208	1.856	121.653	NA	NA	NA	NA	1.856	527.86	1.856	154.464	NA	NA	NA	NA	1.856	436.856	1.856	195.748	1.856	551.847	1.856	108.706	1.856	829.843	1.856	138.333	NA	NA	NA	NA	1.856	343.522	1.856	159.177	1.856	402.027	NA	NA
					31	NA	NA	NA	NA	1.92	494.671	1.92	120.64	NA	NA	NA	NA	1.92	509.628	1.92	158.299	NA	NA	NA	NA	1.92	424.277	1.92	191.586	1.92	480.275	1.92	131.47	1.92	845.28	1.92	140.801	NA	NA	NA	NA	1.92	334.578	1.92	157.972	1.92	422.58	NA	NA
					32	NA	NA	NA	NA	1.984	553.323	1.984	112.85	NA	NA	NA	NA	1.984	532.68	1.984	165.703	NA	NA	NA	NA	1.984	388.836	1.984	194.269	1.984	438.782	1.984	128.59	1.984	998.17	1.984	133.537	NA	NA	NA	NA	1.984	347.288	1.984	161.717	1.984	425.701	NA	NA
					33	NA	NA	NA	NA	2.048	550.71	2.048	108.51	NA	NA	NA	NA	2.048	522.917	2.048	165.041	NA	NA	NA	NA	2.048	336.102	2.048	203.455	2.048	446.992	2.048	119.59	2.048	1115.49	2.048	139.291	NA	NA	NA	NA	2.048	363.618	2.048	162.359	2.048	453.074	NA	NA
					34	NA	NA	NA	NA	2.112	499.383	2.112	109.32	NA	NA	NA	NA	2.112	520.339	2.112	166.742	NA	NA	NA	NA	2.112	327.542	2.112	206.78	2.112	518.576	2.112	108.63	2.112	1146.42	2.112	148.685	NA	NA	NA	NA	2.112	372.779	2.112	156.435	2.112	533.542	NA	NA
					35	NA	NA	NA	NA	2.176	456.784	2.176	113.439	NA	NA	NA	NA	2.176	523.356	2.176	160.987	NA	NA	NA	NA	2.176	303.781	2.176	201.128	2.176	608.461	2.176	99.55	2.176	1119.61	2.176	140.771	NA	NA	NA	NA	2.176	373.704	2.176	157.617	2.176	640.11	NA	NA
					36	NA	NA	NA	NA	2.24	458.351	2.24	113.727	NA	NA	NA	NA	2.24	558.6	2.24	151.1	NA	NA	NA	NA	2.24	265.38	2.24	185.398	2.24	725.375	2.24	96.365	2.24	1034.87	2.24	136.844	NA	NA	NA	NA	2.24	382.774	2.24	159.798	2.24	675.04	NA	NA
					37	NA	NA	NA	NA	2.304	489.931	2.304	103.173	NA	NA	NA	NA	2.304	528.992	2.304	153.369	NA	NA	NA	NA	2.304	243.206	2.304	172.35	2.304	820.834	2.304	98.494	2.304	881.819	2.304	144.716	NA	NA	NA	NA	2.304	395.982	2.304	171.861	2.304	672.495	NA	NA
					38	NA	NA	NA	NA	2.368	525.971	2.368	96.414	NA	NA	NA	NA	2.368	478.187	2.368	154.846	NA	NA	NA	NA	2.368	234.609	2.368	165.922	2.368	794.168	2.368	104.231	2.368	751.788	2.368	144.147	NA	NA	NA	NA	2.368	400.16	2.368	178.045	2.368	695.776	NA	NA
					39	NA	NA	NA	NA	2.432	518.019	2.432	101.401	NA	NA	NA	NA	2.432	399.262	2.432	152.264	NA	NA	NA	NA	2.432	246.216	2.432	163.885	NA	NA	2.432	106.216	2.432	647.502	2.432	123.309	NA	NA	NA	NA	2.432	384.388	2.432	186.447	2.432	701.218	NA	NA
					40	NA	NA	NA	NA	2.496	557.487	2.496	104.526	NA	NA	NA	NA	2.496	358.268	2.496	152.396	NA	NA	NA	NA	2.496	257.834	2.496	161.124	NA	NA	2.496	106.121	2.496	592.361	2.496	123.104	NA	NA	NA	NA	2.496	347.122	2.496	186.097	2.496	744.424	NA	NA
					41	NA	NA	NA	NA	2.56	735.507	2.56	105.223	NA	NA	NA	NA	2.56	324.8	2.56	151.351	NA	NA	NA	NA	2.56	272.657	2.56	161.746	NA	NA	2.56	118.714	2.56	589.049	2.56	139.799	NA	NA	NA	NA	2.56	329.863	2.56	173.197	2.56	780.241	NA	NA
					42	NA	NA	NA	NA	2.624	988.15	2.624	111.176	NA	NA	NA	NA	2.624	297	2.624	144.372	NA	NA	NA	NA	2.624	286.565	2.624	155.185	NA	NA	2.624	131.087	2.624	561.56	2.624	136.631	NA	NA	NA	NA	2.624	346.617	2.624	165.243	2.624	721.871	NA	NA
					43	NA	NA	NA	NA	2.688	1453.39	2.688	114.271	NA	NA	NA	NA	2.688	290.92	2.688	139.058	NA	NA	NA	NA	2.688	330.653	2.688	148.745	NA	NA	2.688	124.441	2.688	506.63	2.688	126.221	NA	NA	NA	NA	2.688	336.713	2.688	179.986	2.688	642.076	NA	NA
					44	NA	NA	NA	NA	2.752	2086.77	2.752	115.358	NA	NA	NA	NA	2.752	307.6	2.752	141.367	NA	NA	NA	NA	2.752	363.508	2.752	151.972	NA	NA	2.752	131.407	2.752	528.934	2.752	122.557	NA	NA	NA	NA	2.752	342.918	2.752	205.018	2.752	542.804	NA	NA
					45	NA	NA	NA	NA	2.816	2275.6	2.816	114.745	NA	NA	NA	NA	NA	NA	2.816	142.595	NA	NA	NA	NA	2.816	416.561	2.816	153.635	NA	NA	2.816	139.259	2.816	579.669	2.816	122.45	NA	NA	NA	NA	2.816	364.405	2.816	201.629	NA	NA	NA	NA
					46	NA	NA	NA	NA	2.88	1958.41	2.88	111.352	NA	NA	NA	NA	NA	NA	2.88	136.106	NA	NA	NA	NA	2.88	495.462	2.88	154.691	NA	NA	2.88	130.596	2.88	623.214	2.88	121.678	NA	NA	NA	NA	2.88	410.227	2.88	188.901	NA	NA	NA	NA
					47	NA	NA	NA	NA	2.944	1287.17	2.944	104.416	NA	NA	NA	NA	NA	NA	2.944	150.053	NA	NA	NA	NA	2.944	587.088	2.944	154.619	NA	NA	2.944	122.919	2.944	655.612	2.944	121.225	NA	NA	NA	NA	2.944	421.968	2.944	185.18	NA	NA	NA	NA
					48	NA	NA	NA	NA	3.008	929.021	3.008	106.824	NA	NA	NA	NA	NA	NA	3.008	155.138	NA	NA	NA	NA	3.008	669.919	3.008	147.053	NA	NA	3.008	117.325	3.008	668.289	3.008	126.205	NA	NA	NA	NA	3.008	397.225	3.008	190.84	NA	NA	NA	NA
					49	NA	NA	NA	NA	3.072	757.112	3.072	110.586	NA	NA	NA	NA	NA	NA	3.072	160.101	NA	NA	NA	NA	3.072	758.536	3.072	153.637	NA	NA	3.072	115.919	3.072	668.306	3.072	135.594	NA	NA	NA	NA	3.072	385.23	3.072	196.117	NA	NA	NA	NA
					50	NA	NA	NA	NA	3.136	662.452	3.136	112.231	NA	NA	NA	NA	NA	NA	3.136	163.946	NA	NA	NA	NA	3.136	861.938	3.136	163.418	NA	NA	3.136	106.367	3.136	700.589	3.136	146.15	NA	NA	NA	NA	3.136	360.041	3.136	211.483	NA	NA	NA	NA
					51	NA	NA	NA	NA	3.2	604.009	3.2	103.877	NA	NA	NA	NA	NA	NA	3.2	159.607	NA	NA	NA	NA	3.2	894.745	3.2	164.867	NA	NA	3.2	96.912	3.2	756.583	3.2	159.404	NA	NA	NA	NA	3.2	300.853	3.2	215.773	NA	NA	NA	NA
					52	NA	NA	NA	NA	3.264	565.154	3.264	102.868	NA	NA	NA	NA	NA	NA	3.264	159.426	NA	NA	NA	NA	3.264	1059	3.264	135.316	NA	NA	3.264	95.391	3.264	819.855	3.264	158.215	NA	NA	NA	NA	3.264	257.618	3.264	207.801	NA	NA	NA	NA
					53	NA	NA	NA	NA	3.328	551.858	3.328	114.247	NA	NA	NA	NA	NA	NA	3.328	151.785	NA	NA	NA	NA	3.328	1232.79	3.328	123.962	NA	NA	3.328	91.032	3.328	818.704	3.328	148.967	NA	NA	NA	NA	3.328	325.839	3.328	200.866	NA	NA	NA	NA
					54	NA	NA	NA	NA	3.392	515.057	3.392	129.064	NA	NA	NA	NA	NA	NA	3.392	153.818	NA	NA	NA	NA	3.392	1272.18	3.392	138.628	NA	NA	3.392	83.978	3.392	761.695	3.392	145.159	NA	NA	NA	NA	3.392	384.62	3.392	195.18	NA	NA	NA	NA
					55	NA	NA	NA	NA	3.456	545.906	3.456	139.257	NA	NA	NA	NA	NA	NA	3.456	164.617	NA	NA	NA	NA	3.456	1235.38	3.456	167.749	NA	NA	3.456	74.245	3.456	670.351	3.456	150.774	NA	NA	NA	NA	3.456	433.184	3.456	194.54	NA	NA	NA	NA
					56	NA	NA	NA	NA	3.52	580.896	3.52	147.783	NA	NA	NA	NA	NA	NA	3.52	166.52	NA	NA	NA	NA	3.52	1088.97	3.52	182.841	NA	NA	3.52	71.499	3.52	628.791	3.52	156.136	NA	NA	NA	NA	3.52	494.039	3.52	188.706	NA	NA	NA	NA
					57	NA	NA	NA	NA	3.584	556.233	3.584	153.68	NA	NA	NA	NA	NA	NA	3.584	145.347	NA	NA	NA	NA	3.584	940.916	3.584	170.795	NA	NA	3.584	79.609	3.584	663.152	3.584	151.878	NA	NA	NA	NA	3.584	538.736	3.584	180.474	NA	NA	NA	NA
					58	NA	NA	NA	NA	3.648	518.584	3.648	138.976	NA	NA	NA	NA	NA	NA	3.648	135.66	NA	NA	NA	NA	3.648	741.543	3.648	159.827	NA	NA	3.648	84.515	3.648	677.568	3.648	142.742	NA	NA	NA	NA	3.648	543.706	3.648	175.56	NA	NA	NA	NA
					59	NA	NA	NA	NA	3.712	471.385	3.712	128.463	NA	NA	NA	NA	NA	NA	3.712	151.908	NA	NA	NA	NA	3.712	661.971	3.712	155.949	NA	NA	3.712	82.878	3.712	687.196	3.712	138.299	NA	NA	NA	NA	3.712	551.21	3.712	167.066	NA	NA	NA	NA
					60	NA	NA	NA	NA	3.776	455.361	3.776	122.566	NA	NA	NA	NA	NA	NA	3.776	159.744	NA	NA	NA	NA	3.776	545.85	3.776	145.881	NA	NA	3.776	89.026	3.776	718.124	3.776	126.108	NA	NA	NA	NA	3.776	548.043	3.776	167.879	NA	NA	NA	NA
					61	NA	NA	NA	NA	3.84	429.129	3.84	130.621	NA	NA	NA	NA	NA	NA	3.84	156.097	NA	NA	NA	NA	3.84	439.676	3.84	149.601	NA	NA	3.84	107.588	3.84	751.813	3.84	127.561	NA	NA	NA	NA	3.84	496.089	3.84	179.641	NA	NA	NA	NA
					62	NA	NA	NA	NA	3.904	382.937	3.904	130.561	NA	NA	NA	NA	NA	NA	3.904	155.937	NA	NA	NA	NA	3.904	384.576	3.904	160.317	NA	NA	NA	NA	NA	NA	3.904	130.475	NA	NA	NA	NA	3.904	482.02	3.904	194.284	NA	NA	NA	NA
					63	NA	NA	NA	NA	3.968	331.827	3.968	125.574	NA	NA	NA	NA	NA	NA	3.968	163	NA	NA	NA	NA	3.968	413.401	3.968	169.808	NA	NA	NA	NA	NA	NA	3.968	127.222	NA	NA	NA	NA	3.968	453.139	3.968	196.404	NA	NA	NA	NA
					64	NA	NA	NA	NA	4.032	283.899	4.032	127.753	NA	NA	NA	NA	NA	NA	4.032	155.914	NA	NA	NA	NA	4.032	397.973	4.032	158.902	NA	NA	NA	NA	NA	NA	4.032	135.424	NA	NA	NA	NA	NA	NA	4.032	186.98	NA	NA	NA	NA
					65	NA	NA	NA	NA	4.096	252.295	4.096	129.054	NA	NA	NA	NA	NA	NA	4.096	154.882	NA	NA	NA	NA	4.096	341.223	4.096	169.626	NA	NA	NA	NA	NA	NA	4.096	147.348	NA	NA	NA	NA	NA	NA	4.096	172.57	NA	NA	NA	NA
					66	NA	NA	NA	NA	4.16	236.225	4.16	140.652	NA	NA	NA	NA	NA	NA	NA	NA	NA	NA	NA	NA	4.16	300.759	4.16	176.598	NA	NA	NA	NA	NA	NA	4.16	137.784	NA	NA	NA	NA	NA	NA	4.16	169.365	NA	NA	NA	NA
					67	NA	NA	NA	NA	4.224	254.442	4.224	161.869	NA	NA	NA	NA	NA	NA	NA	NA	NA	NA	NA	NA	4.224	303.019	4.224	190.483	NA	NA	NA	NA	NA	NA	4.224	141.041	NA	NA	NA	NA	NA	NA	4.224	173.304	NA	NA	NA	NA
					68	NA	NA	NA	NA	4.288	269.329	4.288	172.909	NA	NA	NA	NA	NA	NA	NA	NA	NA	NA	NA	NA	4.288	321.613	4.288	200.022	NA	NA	NA	NA	NA	NA	4.288	148.747	NA	NA	NA	NA	NA	NA	4.288	171.844	NA	NA	NA	NA
					69	NA	NA	NA	NA	4.352	261.093	4.352	169.916	NA	NA	NA	NA	NA	NA	NA	NA	NA	NA	NA	NA	4.352	355.068	4.352	190.916	NA	NA	NA	NA	NA	NA	4.352	148.653	NA	NA	NA	NA	NA	NA	4.352	174.649	NA	NA	NA	NA
					70	NA	NA	NA	NA	4.416	248.166	4.416	159.768	NA	NA	NA	NA	NA	NA	NA	NA	NA	NA	NA	NA	4.416	382.296	4.416	181.302	NA	NA	NA	NA	NA	NA	4.416	155.091	NA	NA	NA	NA	NA	NA	4.416	180.728	NA	NA	NA	NA
					71	NA	NA	NA	NA	4.48	248.966	4.48	153.297	NA	NA	NA	NA	NA	NA	NA	NA	NA	NA	NA	NA	4.48	384.661	4.48	187.354	NA	NA	NA	NA	NA	NA	4.48	162.176	NA	NA	NA	NA	NA	NA	4.48	186.123	NA	NA	NA	NA
					72	NA	NA	NA	NA	4.544	272.74	4.544	146.122	NA	NA	NA	NA	NA	NA	NA	NA	NA	NA	NA	NA	4.544	366.757	4.544	196.329	NA	NA	NA	NA	NA	NA	4.544	164.872	NA	NA	NA	NA	NA	NA	4.544	192.248	NA	NA	NA	NA
					73	NA	NA	NA	NA	4.608	318.686	4.608	146.259	NA	NA	NA	NA	NA	NA	NA	NA	NA	NA	NA	NA	4.608	382.14	4.608	206.936	NA	NA	NA	NA	NA	NA	4.608	148.097	NA	NA	NA	NA	NA	NA	4.608	201.32	NA	NA	NA	NA
					74	NA	NA	NA	NA	4.672	374.398	4.672	149.801	NA	NA	NA	NA	NA	NA	NA	NA	NA	NA	NA	NA	4.672	430.62	4.672	197.648	NA	NA	NA	NA	NA	NA	4.672	146.846	NA	NA	NA	NA	NA	NA	4.672	203.275	NA	NA	NA	NA
					75	NA	NA	NA	NA	4.736	414.954	4.736	139.261	NA	NA	NA	NA	NA	NA	NA	NA	NA	NA	NA	NA	4.736	485.021	4.736	181.732	NA	NA	NA	NA	NA	NA	4.736	155.81	NA	NA	NA	NA	NA	NA	4.736	188.323	NA	NA	NA	NA
					76	NA	NA	NA	NA	4.8	432.465	4.8	130.721	NA	NA	NA	NA	NA	NA	NA	NA	NA	NA	NA	NA	4.8	524.142	4.8	176.334	NA	NA	NA	NA	NA	NA	4.8	154.108	NA	NA	NA	NA	NA	NA	4.8	189.749	NA	NA	NA	NA
					77	NA	NA	NA	NA	4.864	427.706	4.864	130.175	NA	NA	NA	NA	NA	NA	NA	NA	NA	NA	NA	NA	4.864	514.043	4.864	182.883	NA	NA	NA	NA	NA	NA	4.864	161.975	NA	NA	NA	NA	NA	NA	4.864	196.316	NA	NA	NA	NA
					78	NA	NA	NA	NA	4.928	405.065	4.928	134.465	NA	NA	NA	NA	NA	NA	NA	NA	NA	NA	NA	NA	4.928	452.548	4.928	197.213	NA	NA	NA	NA	NA	NA	4.928	155.902	NA	NA	NA	NA	NA	NA	4.928	198.806	NA	NA	NA	NA
					79	NA	NA	NA	NA	4.992	408.168	4.992	131.763	NA	NA	NA	NA	NA	NA	NA	NA	NA	NA	NA	NA	4.992	427.241	4.992	187.897	NA	NA	NA	NA	NA	NA	4.992	166.875	NA	NA	NA	NA	NA	NA	4.992	196.365	NA	NA	NA	NA
					80	NA	NA	NA	NA	5.056	434.027	5.056	136.604	NA	NA	NA	NA	NA	NA	NA	NA	NA	NA	NA	NA	5.056	392.883	5.056	173.07	NA	NA	NA	NA	NA	NA	5.056	179.751	NA	NA	NA	NA	NA	NA	5.056	170.743	NA	NA	NA	NA
					81	NA	NA	NA	NA	5.12	444.544	5.12	143.633	NA	NA	NA	NA	NA	NA	NA	NA	NA	NA	NA	NA	5.12	389.138	5.12	166.726	NA	NA	NA	NA	NA	NA	5.12	170.772	NA	NA	NA	NA	NA	NA	5.12	160.536	NA	NA	NA	NA
					82	NA	NA	NA	NA	5.184	464.407	5.184	147.705	NA	NA	NA	NA	NA	NA	NA	NA	NA	NA	NA	NA	5.184	403.349	5.184	166.58	NA	NA	NA	NA	NA	NA	5.184	159.023	NA	NA	NA	NA	NA	NA	5.184	173.72	NA	NA	NA	NA
					83	NA	NA	NA	NA	5.248	485.078	5.248	162.665	NA	NA	NA	NA	NA	NA	NA	NA	NA	NA	NA	NA	5.248	364.199	5.248	170.256	NA	NA	NA	NA	NA	NA	5.248	166.302	NA	NA	NA	NA	NA	NA	5.248	193.571	NA	NA	NA	NA
					84	NA	NA	NA	NA	5.312	457.503	5.312	157.056	NA	NA	NA	NA	NA	NA	NA	NA	NA	NA	NA	NA	5.312	291.998	5.312	188.877	NA	NA	NA	NA	NA	NA	5.312	175.046	NA	NA	NA	NA	NA	NA	5.312	206.758	NA	NA	NA	NA
					85	NA	NA	NA	NA	5.376	451.634	5.376	150.562	NA	NA	NA	NA	NA	NA	NA	NA	NA	NA	NA	NA	5.376	285.942	5.376	183.481	NA	NA	NA	NA	NA	NA	5.376	165.179	NA	NA	NA	NA	NA	NA	5.376	193.58	NA	NA	NA	NA
					86	NA	NA	NA	NA	5.44	511.91	5.44	151.703	NA	NA	NA	NA	NA	NA	NA	NA	NA	NA	NA	NA	5.44	413.171	5.44	181.971	NA	NA	NA	NA	NA	NA	5.44	146.498	NA	NA	NA	NA	NA	NA	5.44	176.129	NA	NA	NA	NA
					87	NA	NA	NA	NA	5.504	576.94	5.504	158.22	NA	NA	NA	NA	NA	NA	NA	NA	NA	NA	NA	NA	5.504	771.363	5.504	183.729	NA	NA	NA	NA	NA	NA	5.504	140.235	NA	NA	NA	NA	NA	NA	5.504	182.666	NA	NA	NA	NA
					88	NA	NA	NA	NA	5.568	646.701	5.568	141.344	NA	NA	NA	NA	NA	NA	NA	NA	NA	NA	NA	NA	5.568	1481.46	5.568	180.316	NA	NA	NA	NA	NA	NA	5.568	148.755	NA	NA	NA	NA	NA	NA	5.568	183.172	NA	NA	NA	NA
					89	NA	NA	NA	NA	5.632	708.508	5.632	115.643	NA	NA	NA	NA	NA	NA	NA	NA	NA	NA	NA	NA	5.632	1981.6	5.632	175.1	NA	NA	NA	NA	NA	NA	5.632	157.313	NA	NA	NA	NA	NA	NA	5.632	185.861	NA	NA	NA	NA
					90	NA	NA	NA	NA	5.696	752.014	5.696	106.462	NA	NA	NA	NA	NA	NA	NA	NA	NA	NA	NA	NA	5.696	1673.22	5.696	182.691	NA	NA	NA	NA	NA	NA	5.696	166.397	NA	NA	NA	NA	NA	NA	5.696	199.697	NA	NA	NA	NA
					91	NA	NA	NA	NA	5.76	728.155	5.76	117.878	NA	NA	NA	NA	NA	NA	NA	NA	NA	NA	NA	NA	5.76	1076.09	5.76	169.289	NA	NA	NA	NA	NA	NA	5.76	180.911	NA	NA	NA	NA	NA	NA	5.76	210.696	NA	NA	NA	NA
					92	NA	NA	NA	NA	5.824	609.968	5.824	126.88	NA	NA	NA	NA	NA	NA	NA	NA	NA	NA	NA	NA	5.824	596.098	5.824	176.469	NA	NA	NA	NA	NA	NA	5.824	178.901	NA	NA	NA	NA	NA	NA	NA	NA	NA	NA	NA	NA
					93	NA	NA	NA	NA	5.888	524.57	5.888	135.67	NA	NA	NA	NA	NA	NA	NA	NA	NA	NA	NA	NA	5.888	332.261	5.888	170.632	NA	NA	NA	NA	NA	NA	5.888	179.605	NA	NA	NA	NA	NA	NA	NA	NA	NA	NA	NA	NA
					94	NA	NA	NA	NA	5.952	481.01	5.952	141.012	NA	NA	NA	NA	NA	NA	NA	NA	NA	NA	NA	NA	5.952	228.553	5.952	138.741	NA	NA	NA	NA	NA	NA	5.952	180.166	NA	NA	NA	NA	NA	NA	NA	NA	NA	NA	NA	NA
					95	NA	NA	NA	NA	6.016	407.06	6.016	139.78	NA	NA	NA	NA	NA	NA	NA	NA	NA	NA	NA	NA	6.016	220.174	6.016	130.019	NA	NA	NA	NA	NA	NA	6.016	176.112	NA	NA	NA	NA	NA	NA	NA	NA	NA	NA	NA	NA
					96	NA	NA	NA	NA	6.08	329.06	6.08	139	NA	NA	NA	NA	NA	NA	NA	NA	NA	NA	NA	NA	6.08	263.722	6.08	129.122	NA	NA	NA	NA	NA	NA	6.08	167.364	NA	NA	NA	NA	NA	NA	NA	NA	NA	NA	NA	NA
					97	NA	NA	NA	NA	6.144	251.79	6.144	131.884	NA	NA	NA	NA	NA	NA	NA	NA	NA	NA	NA	NA	6.144	297.88	6.144	140.567	NA	NA	NA	NA	NA	NA	6.144	173.479	NA	NA	NA	NA	NA	NA	NA	NA	NA	NA	NA	NA
					98	NA	NA	NA	NA	6.208	200.34	6.208	127.337	NA	NA	NA	NA	NA	NA	NA	NA	NA	NA	NA	NA	6.208	329.965	6.208	143.132	NA	NA	NA	NA	NA	NA	6.208	169.402	NA	NA	NA	NA	NA	NA	NA	NA	NA	NA	NA	NA
					99	NA	NA	NA	NA	6.272	189.73	6.272	135.99	NA	NA	NA	NA	NA	NA	NA	NA	NA	NA	NA	NA	6.272	344.814	6.272	157.135	NA	NA	NA	NA	NA	NA	6.272	161.395	NA	NA	NA	NA	NA	NA	NA	NA	NA	NA	NA	NA
					100	NA	NA	NA	NA	6.336	197.755	6.336	136.222	NA	NA	NA	NA	NA	NA	NA	NA	NA	NA	NA	NA	6.336	362.474	6.336	168.708	NA	NA	NA	NA	NA	NA	6.336	155.468	NA	NA	NA	NA	NA	NA	NA	NA	NA	NA	NA	NA
					101	NA	NA	NA	NA	6.4	217.154	6.4	131.828	NA	NA	NA	NA	NA	NA	NA	NA	NA	NA	NA	NA	6.4	381.439	6.4	160.4	NA	NA	NA	NA	NA	NA	6.4	158.276	NA	NA	NA	NA	NA	NA	NA	NA	NA	NA	NA	NA
					102	NA	NA	NA	NA	6.464	255.506	6.464	142.522	NA	NA	NA	NA	NA	NA	NA	NA	NA	NA	NA	NA	NA	NA	NA	NA	NA	NA	NA	NA	NA	NA	6.464	163.579	NA	NA	NA	NA	NA	NA	NA	NA	NA	NA	NA	NA
					103	NA	NA	NA	NA	6.528	318.357	6.528	149.926	NA	NA	NA	NA	NA	NA	NA	NA	NA	NA	NA	NA	NA	NA	NA	NA	NA	NA	NA	NA	NA	NA	6.528	164.119	NA	NA	NA	NA	NA	NA	NA	NA	NA	NA	NA	NA
					104	NA	NA	NA	NA	6.592	366.265	6.592	149.386	NA	NA	NA	NA	NA	NA	NA	NA	NA	NA	NA	NA	NA	NA	NA	NA	NA	NA	NA	NA	NA	NA	6.592	168.725	NA	NA	NA	NA	NA	NA	NA	NA	NA	NA	NA	NA
					105	NA	NA	NA	NA	6.656	362.287	6.656	151.027	NA	NA	NA	NA	NA	NA	NA	NA	NA	NA	NA	NA	NA	NA	NA	NA	NA	NA	NA	NA	NA	NA	6.656	169.086	NA	NA	NA	NA	NA	NA	NA	NA	NA	NA	NA	NA
					106	NA	NA	NA	NA	6.72	340.094	6.72	154.234	NA	NA	NA	NA	NA	NA	NA	NA	NA	NA	NA	NA	NA	NA	NA	NA	NA	NA	NA	NA	NA	NA	6.72	170.153	NA	NA	NA	NA	NA	NA	NA	NA	NA	NA	NA	NA
					107	NA	NA	NA	NA	6.784	297.86	6.784	160.944	NA	NA	NA	NA	NA	NA	NA	NA	NA	NA	NA	NA	NA	NA	NA	NA	NA	NA	NA	NA	NA	NA	6.784	161.342	NA	NA	NA	NA	NA	NA	NA	NA	NA	NA	NA	NA
					108																									NA	NA	NA	NA	NA	NA	6.848	157.823	NA	NA	NA	NA	NA	NA	NA	NA	NA	NA	NA	NA
					109																									NA	NA	NA	NA	NA	NA	6.912	161.076	NA	NA	NA	NA	NA	NA	NA	NA	NA	NA	NA	NA
					110																									NA	NA	NA	NA	NA	NA	6.976	167.336	NA	NA	NA	NA	NA	NA	NA	NA	NA	NA	NA	NA
					111																									NA	NA	NA	NA	NA	NA	7.04	182.315	NA	NA	NA	NA	NA	NA	NA	NA	NA	NA	NA	NA
					112																									NA	NA	NA	NA	NA	NA	7.104	179.581	NA	NA	NA	NA	NA	NA	NA	NA	NA	NA	NA	NA
					113																									NA	NA	NA	NA	NA	NA	7.168	164.699	NA	NA	NA	NA	NA	NA	NA	NA	NA	NA	NA	NA
					114																									NA	NA	NA	NA	NA	NA	7.232	160.6	NA	NA	NA	NA	NA	NA	NA	NA	NA	NA	NA	NA
					115																									NA	NA	NA	NA	NA	NA	7.296	162.188	NA	NA	NA	NA	NA	NA	NA	NA	NA	NA	NA	NA
					116																									NA	NA	NA	NA	NA	NA	7.36	165.606	NA	NA	NA	NA	NA	NA	NA	NA	NA	NA	NA	NA
					117																									NA	NA	NA	NA	NA	NA	7.424	180.538	NA	NA	NA	NA	NA	NA	NA	NA	NA	NA	NA	NA
					118																									NA	NA	NA	NA	NA	NA	7.488	190.706	NA	NA	NA	NA	NA	NA	NA	NA	NA	NA	NA	NA
					119																									NA	NA	NA	NA	NA	NA	7.552	177.668	NA	NA	NA	NA	NA	NA	NA	NA	NA	NA	NA	NA
					120																									NA	NA	NA	NA	NA	NA	7.616	174.145	NA	NA	NA	NA	NA	NA	NA	NA	NA	NA	NA	NA
					121																									NA	NA	NA	NA	NA	NA	7.68	177.238	NA	NA	NA	NA	NA	NA	NA	NA	NA	NA	NA	NA
					122																									NA	NA	NA	NA	NA	NA	NA	NA	NA	NA	NA	NA	NA	NA	NA	NA	NA	NA	NA	NA
					123																									NA	NA	NA	NA	NA	NA	NA	NA	NA	NA	NA	NA	NA	NA	NA	NA	NA	NA	NA	NA
					124																									NA	NA	NA	NA	NA	NA	NA	NA	NA	NA	NA	NA	NA	NA	NA	NA	NA	NA	NA	NA
					125																									NA	NA	NA	NA	NA	NA	NA	NA	NA	NA	NA	NA	NA	NA	NA	NA	NA	NA	NA	NA
					126																									NA	NA	NA	NA	NA	NA	NA	NA	NA	NA	NA	NA	NA	NA	NA	NA	NA	NA	NA	NA
					127																									NA	NA	NA	NA	NA	NA	NA	NA	NA	NA	NA	NA	NA	NA	NA	NA	NA	NA	NA	NA
					128																									NA	NA	NA	NA	NA	NA	NA	NA	NA	NA	NA	NA	NA	NA	NA	NA	NA	NA	NA	NA
					129																									NA	NA	NA	NA	NA	NA	NA	NA	NA	NA	NA	NA	NA	NA	NA	NA	NA	NA	NA	NA
					130																									NA	NA	NA	NA	NA	NA	NA	NA	NA	NA	NA	NA	NA	NA	NA	NA	NA	NA	NA	NA
					131																									NA	NA	NA	NA	NA	NA	NA	NA	NA	NA	NA	NA	NA	NA	NA	NA	NA	NA	NA	NA
					132																									NA	NA	NA	NA	NA	NA	NA	NA	NA	NA	NA	NA	NA	NA	NA	NA	NA	NA	NA	NA
					133																									NA	NA	NA	NA	NA	NA	NA	NA	NA	NA	NA	NA	NA	NA	NA	NA	NA	NA	NA	NA
					134																									NA	NA	NA	NA	NA	NA	NA	NA	NA	NA	NA	NA	NA	NA	NA	NA	NA	NA	NA	NA
					135																									NA	NA	NA	NA	NA	NA	NA	NA	NA	NA	NA	NA	NA	NA	NA	NA	NA	NA	NA	NA
					136																									NA	NA	NA	NA	NA	NA	NA	NA	NA	NA	NA	NA	NA	NA	NA	NA	NA	NA	NA	NA
					137																									NA	NA	NA	NA	NA	NA	NA	NA	NA	NA	NA	NA	NA	NA	NA	NA	NA	NA	NA	NA
					138																									NA	NA	NA	NA	NA	NA	NA	NA	NA	NA	NA	NA	NA	NA	NA	NA	NA	NA	NA	NA
					139																									NA	NA	NA	NA	NA	NA	NA	NA	NA	NA	NA	NA	NA	NA	NA	NA	NA	NA	NA	NA
					140																									NA	NA	NA	NA	NA	NA	NA	NA	NA	NA	NA	NA	NA	NA	NA	NA	NA	NA	NA	NA
					141																									NA	NA	NA	NA	NA	NA	NA	NA	NA	NA	NA	NA	NA	NA	NA	NA	NA	NA	NA	NA
					142																									NA	NA	NA	NA	NA	NA	NA	NA	NA	NA	NA	NA	NA	NA	NA	NA	NA	NA	NA	NA
					143																									NA	NA	NA	NA	NA	NA	NA	NA	NA	NA	NA	NA	NA	NA	NA	NA	NA	NA	NA	NA
					144																									NA	NA	NA	NA	NA	NA	NA	NA	NA	NA	NA	NA	NA	NA	NA	NA	NA	NA	NA	NA
					145																									NA	NA	NA	NA	NA	NA	NA	NA	NA	NA	NA	NA	NA	NA	NA	NA	NA	NA	NA	NA
					146																									NA	NA	NA	NA	NA	NA	NA	NA	NA	NA	NA	NA	NA	NA	NA	NA	NA	NA	NA	NA
					147																									NA	NA	NA	NA	NA	NA	NA	NA	NA	NA	NA	NA	NA	NA	NA	NA	NA	NA	NA	NA
					148																									NA	NA	NA	NA	NA	NA	NA	NA	NA	NA	NA	NA	NA	NA	NA	NA	NA	NA	NA	NA
					149																									NA	NA	NA	NA	NA	NA	NA	NA	NA	NA	NA	NA	NA	NA	NA	NA	NA	NA	NA	NA
					150																									NA	NA	NA	NA	NA	NA	NA	NA	NA	NA	NA	NA	NA	NA	NA	NA	NA	NA	NA	NA
					151																									NA	NA	NA	NA	NA	NA	NA	NA	NA	NA	NA	NA	NA	NA	NA	NA	NA	NA	NA	NA
					152																									NA	NA	NA	NA	NA	NA	NA	NA	NA	NA	NA	NA	NA	NA	NA	NA	NA	NA	NA	NA
					153																									NA	NA	NA	NA	NA	NA	NA	NA	NA	NA	NA	NA	NA	NA	NA	NA	NA	NA	NA	NA
					154																									NA	NA	NA	NA	NA	NA	NA	NA	NA	NA	NA	NA	NA	NA	NA	NA	NA	NA	NA	NA
					155																									NA	NA	NA	NA	NA	NA	NA	NA	NA	NA	NA	NA	NA	NA	NA	NA	NA	NA	NA	NA
					156																									NA	NA	NA	NA	NA	NA	NA	NA	NA	NA	NA	NA	NA	NA	NA	NA	NA	NA	NA	NA
					157																									NA	NA	NA	NA	NA	NA	NA	NA	NA	NA	NA	NA	NA	NA	NA	NA	NA	NA	NA	NA
					158																									NA	NA	NA	NA	NA	NA	NA	NA	NA	NA	NA	NA	NA	NA	NA	NA	NA	NA	NA	NA
					159																									NA	NA	NA	NA	NA	NA	NA	NA	NA	NA	NA	NA	NA	NA	NA	NA	NA	NA	NA	NA
					160																									NA	NA	NA	NA	NA	NA	NA	NA	NA	NA	NA	NA	NA	NA	NA	NA	NA	NA	NA	NA
					161																									NA	NA	NA	NA	NA	NA	NA	NA	NA	NA	NA	NA	NA	NA	NA	NA	NA	NA	NA	NA
					162																									NA	NA	NA	NA	NA	NA	NA	NA	NA	NA	NA	NA	NA	NA	NA	NA	NA	NA	NA	NA
					163																									NA	NA	NA	NA	NA	NA	NA	NA	NA	NA	NA	NA	NA	NA	NA	NA	NA	NA	NA	NA
					164																									NA	NA	NA	NA	NA	NA	NA	NA	NA	NA	NA	NA	NA	NA	NA	NA	NA	NA	NA	NA
					165																									NA	NA	NA	NA	NA	NA	NA	NA	NA	NA	NA	NA	NA	NA	NA	NA	NA	NA	NA	NA
					166																									NA	NA	NA	NA	NA	NA	NA	NA	NA	NA	NA	NA	NA	NA	NA	NA	NA	NA	NA	NA
					167																									NA	NA	NA	NA	NA	NA	NA	NA	NA	NA	NA	NA	NA	NA	NA	NA	NA	NA	NA	NA
					168																									NA	NA	NA	NA	NA	NA	NA	NA	NA	NA	NA	NA	NA	NA	NA	NA	NA	NA	NA	NA
					169																									NA	NA	NA	NA	NA	NA	NA	NA	NA	NA	NA	NA	NA	NA	NA	NA	NA	NA	NA	NA
					170																									NA	NA	NA	NA	NA	NA	NA	NA	NA	NA	NA	NA	NA	NA	NA	NA	NA	NA	NA	NA
					171																									NA	NA	NA	NA	NA	NA	NA	NA	NA	NA	NA	NA	NA	NA	NA	NA	NA	NA	NA	NA
[truncated: 228 more columns]

## Sheet: Msn5
Msn5-GFP						1								2								3								4								5								6
						Ic				Ir		Ibg		Ic				Ir		Ibg		Ic				Ir		Ibg		Ic				Ir		Ibg		Ic				Ir		Ibg		Ic
							269.975				175.057		165.916		252.331				200.134		162.282		237.397				216.949		157.923		294.562				232.275		160.716		336.907				220.558		164.075		227.296
							104.059								90.0486								79.474								133.846								172.832								41.8023
	average	median	SEM	n		Relative accumulation (RA)					9.14084			Relative accumulation (RA)					37.8522			Relative accumulation (RA)					59.0265			Relative accumulation (RA)					71.5595			Relative accumulation (RA)					56.4829			Relative accumulation (RA)
RA:	3.05922	2.72581	0.412294	23		11.3839								2.37895								1.34641								1.87041								3.0599								3.12823
	p-value
	6.85489e-10
						180530_15370_Msn5_01_03_Crop_1GFP_x_lc	180530_15370_Msn5_01_03_Crop_1GFP_y_lc	180530_15370_Msn5_01_03_Crop_1mCh_x_cap	180530_15370_Msn5_01_03_Crop_1mCh_y_cap	180530_15370_Msn5_01_03_Crop_1GFP_x_lr	180530_15370_Msn5_01_03_Crop_1GFP_y_lr	180530_15370_Msn5_01_03_Crop_1GFP_x_bg	180530_15370_Msn5_01_03_Crop_1GFP_y_bg	180530_15370_Msn5_01_04_Crop_1GFP_x_lc	180530_15370_Msn5_01_04_Crop_1GFP_y_lc	180530_15370_Msn5_01_04_Crop_1mCh_x_cap	180530_15370_Msn5_01_04_Crop_1mCh_y_cap	180530_15370_Msn5_01_04_Crop_1GFP_x_lr	180530_15370_Msn5_01_04_Crop_1GFP_y_lr	180530_15370_Msn5_01_04_Crop_1GFP_x_bg	180530_15370_Msn5_01_04_Crop_1GFP_y_bg	180530_15370_Msn5_01_05_Crop_1GFP_x_lc	180530_15370_Msn5_01_05_Crop_1GFP_y_lc	180530_15370_Msn5_01_05_Crop_1mCh_x_cap	180530_15370_Msn5_01_05_Crop_1mCh_y_cap	180530_15370_Msn5_01_05_Crop_1GFP_x_lr	180530_15370_Msn5_01_05_Crop_1GFP_y_lr	180530_15370_Msn5_01_05_Crop_1GFP_x_bg	180530_15370_Msn5_01_05_Crop_1GFP_y_bg	180530_15370_Msn5_01_06_Crop_1GFP_x_lc	180530_15370_Msn5_01_06_Crop_1GFP_y_lc	180530_15370_Msn5_01_06_Crop_1mCh_x_cap	180530_15370_Msn5_01_06_Crop_1mCh_y_cap	180530_15370_Msn5_01_06_Crop_1GFP_x_lr	180530_15370_Msn5_01_06_Crop_1GFP_y_lr	180530_15370_Msn5_01_06_Crop_1GFP_x_bg	180530_15370_Msn5_01_06_Crop_1GFP_y_bg	180530_15370_Msn5_01_07_Crop_1GFP_x_lc	180530_15370_Msn5_01_07_Crop_1GFP_y_lc	180530_15370_Msn5_01_07_Crop_1mCh_x_cap	180530_15370_Msn5_01_07_Crop_1mCh_y_cap	180530_15370_Msn5_01_07_Crop_1GFP_x_lr	180530_15370_Msn5_01_07_Crop_1GFP_y_lr	180530_15370_Msn5_01_07_Crop_1GFP_x_bg	180530_15370_Msn5_01_07_Crop_1GFP_y_bg	180530_15370_Msn5_01_08_Crop_1GFP_x_lc	180530_15370_Msn5_01_08_Crop_1GFP_y_lc	180530_15370_Msn5_01_08_Crop_1mCh_x_cap	180530_15370_Msn5_01_08_Crop_1mCh_y_cap
					1	0	184	0	1752	0	181	0	163	0	218	0	235	0	193	0	151	0	252	0	18	0	163	0	163	0	208	0	2910	0	193	0	168	0	316	0	1856	0	269	0	151	0	232	0	823
					2	0.064	199.48	0.064	2672.19	0.064	184.971	0.064	165.521	0.064	219.218	0.064	409.846	0.064	178.983	0.064	165.283	0.064	256.604	0.064	25.226	0.064	181.069	0.064	148.287	0.064	240.87	0.064	3582.58	0.064	200.865	0.064	174.171	0.064	319.782	0.064	3014.7	0.064	235.48	0.064	152.232	0.064	220	0.064	932
					3	0.128	215.28	0.128	3370.57	0.128	187.642	0.128	160.152	0.128	235.225	0.128	604.37	0.128	178.784	0.128	179.199	0.128	253.09	0.128	50.829	0.128	195.75	0.128	151.585	0.128	277.343	0.128	3945.92	0.128	191.988	0.128	166.473	0.128	302.938	0.128	3939.2	0.128	222.251	0.128	161.354	0.128	212	0.128	1050
					4	0.192	237.04	0.192	3799.78	0.192	188.964	0.192	165.7	0.192	240.341	0.192	722.631	0.192	185.761	0.192	176.063	0.192	248.999	0.192	126.652	0.192	200.599	0.192	171.296	0.192	315.813	0.192	4052.97	0.192	180.161	0.192	173.897	0.192	329.726	0.192	4398.82	0.192	231.663	0.192	173.138	0.192	205	0.192	1108
					5	0.256	252.92	0.256	3790.38	0.256	188.342	0.256	170.234	0.256	236.238	0.256	853.751	0.256	196.505	0.256	164.475	0.256	251.014	0.256	366.554	0.256	191.85	0.256	163.744	0.256	334.084	0.256	3952.95	0.256	178.144	0.256	179.91	0.256	388.015	0.256	4473.34	0.256	233.919	0.256	164.842	0.256	213	0.256	1031
					6	0.32	270	0.32	3606	0.32	182.435	0.32	174.812	0.32	234.013	0.32	866.628	0.32	206.77	0.32	150.86	0.32	233.584	0.32	903.868	0.32	186.584	0.32	154.188	0.32	333.713	0.32	3817.77	0.32	197.096	0.32	159.984	0.32	397.265	0.32	4634.76	0.32	227.791	0.32	154.795	0.32	234	0.32	940
					7	0.384	278.28	0.384	3428.36	0.384	180.387	0.384	159.55	0.384	218.347	0.384	789.287	0.384	217.364	0.384	146.161	0.384	205.223	0.384	1679.72	0.384	186.475	0.384	144.856	0.384	338.136	0.384	3675.84	0.384	218.516	0.384	158.581	0.384	417.433	0.384	4760.09	0.384	236.655	0.384	161.564	0.384	249	0.384	860
					8	0.448	279.52	0.448	3389.26	0.448	182.406	0.448	161.058	0.448	206.429	0.448	737.353	0.448	222.57	0.448	146.595	0.448	211.799	0.448	2479.2	0.448	198.346	0.448	148.265	0.448	361.759	0.448	3469.46	0.448	211.022	0.448	153.198	0.448	497.257	0.448	4790.27	0.448	258.661	0.448	165.14	0.448	224	0.448	763
					9	0.512	270.12	0.512	3628.93	0.512	186.839	0.512	182.779	0.512	202.836	0.512	704.013	0.512	229.562	0.512	150.699	0.512	221.883	0.512	3033.26	0.512	187.219	0.512	162.809	0.512	375.187	0.512	3092.43	0.512	205.44	0.512	148.413	0.512	505.401	0.512	4776.91	0.512	271.686	0.512	172.291	0.512	251.64	0.512	852.56
					10	0.576	246.52	0.576	3857.91	0.576	188.867	0.576	187.809	0.576	197.518	0.576	714.843	0.576	207.78	0.576	168.578	0.576	227.311	0.576	3311.62	0.576	174.016	0.576	176.521	0.576	360.132	0.576	2682.07	0.576	203.725	0.576	147.769	0.576	441.598	0.576	4464.91	0.576	242.927	0.576	171.806	0.576	264.92	0.576	844.48
					11	0.64	207	0.64	4090.59	0.64	180.218	0.64	179.378	0.64	207.327	0.64	799.654	0.64	195.279	0.64	177.193	0.64	236.533	0.64	3413.17	0.64	179.377	0.64	177.46	0.64	329.8	0.64	2190.9	0.64	196.036	0.64	143.219	0.64	364.898	0.64	4201.75	0.64	237.987	0.64	182.932	0.64	255.44	0.64	799.2
					12	0.704	176.938	0.704	4117.65	0.704	185.406	0.704	172.279	0.704	227.928	0.704	861.841	0.704	205.876	0.704	173.151	0.704	232.516	0.704	3464.06	0.704	191.837	0.704	171.284	0.704	299.6	0.704	1803	0.704	185.376	0.704	157.611	0.704	309.056	0.704	4267.74	0.704	235.028	0.704	185.646	0.704	246.92	0.704	735.48
					13	0.768	164.896	0.768	4157.82	0.768	183.979	0.768	175.115	0.768	245.815	0.768	952.313	0.768	217.458	0.768	164.529	0.768	231.209	0.768	3595.26	0.768	191.966	0.768	163.744	0.768	281	0.768	1766.2	0.768	184.496	0.768	155.042	0.768	281.359	0.768	4296.28	0.768	230.431	0.768	171.718	0.768	230	0.768	628
					14	0.832	184.519	0.832	4102.65	0.832	181.397	0.832	174.686	0.832	259.359	0.832	1002.96	0.832	199.395	0.832	154.483	0.832	234.767	0.832	3668.06	0.832	185.987	0.832	151.638	0.832	292.2	0.832	1825.6	0.832	205.438	0.832	142.931	0.832	243.85	0.832	4171.37	0.832	226.711	0.832	159.102	0.832	232.636	0.832	665.261
					15	0.896	213.263	0.896	4038.58	0.896	171.836	0.896	190.233	0.896	259.849	0.896	984.106	0.896	185.742	0.896	154.642	0.896	232.817	0.896	3694.73	0.896	179.262	0.896	150.598	0.896	307.4	0.896	1772.6	0.896	228.2	0.896	141.288	0.896	229.167	0.896	3898.94	0.896	228.406	0.896	176.363	0.896	241.397	0.896	721.713
					16	0.96	232.248	0.96	4256.16	0.96	173.811	0.96	196.511	0.96	255.769	0.96	935.322	0.96	181.634	0.96	166.033	0.96	235.128	0.96	3674.83	0.96	176.536	0.96	152.093	0.96	293	0.96	1544.4	0.96	241.309	0.96	145.594	0.96	225.399	0.96	3527.73	0.96	226.389	0.96	180.025	0.96	230.57	0.96	788.834
					17	1.024	262.687	1.024	4303.79	1.024	169.166	1.024	173.861	1.024	255.418	1.024	887.505	1.024	193.215	1.024	170.739	1.024	238.549	1.024	3631.64	1.024	175.518	1.024	151.468	1.024	269.8	1.024	1216.4	1.024	242.508	1.024	156.296	1.024	225.052	1.024	3117.51	1.024	245.77	1.024	179.389	1.024	219.427	1.024	782.445
					18	1.088	290.441	1.088	4239.44	1.088	154.172	1.088	162.198	1.088	269.303	1.088	923.249	1.088	198.892	1.088	163.727	1.088	234.809	1.088	3657.53	1.088	184.984	1.088	151.191	1.088	250	1.088	815.2	1.088	224.213	1.088	150.691	1.088	239.518	1.088	2566.65	1.088	256.022	1.088	174.731	1.088	217.66	1.088	703.231
					19	1.152	309.432	1.152	4149.65	1.152	151.309	1.152	161.819	1.152	289.077	1.152	990.196	1.152	195.456	1.152	163.98	1.152	236.333	1.152	3893.27	1.152	220.24	1.152	155.822	1.152	220.4	1.152	459.2	1.152	212.79	1.152	151.733	1.152	268.109	1.152	2047.28	1.152	248.129	1.152	155.188	1.152	199.887	1.152	714.942
					20	1.216	322.094	1.216	4012.16	1.216	159.889	1.216	163.778	1.216	312.924	1.216	959.323	1.216	190.312	1.216	166.659	1.216	241.582	1.216	4110.68	1.216	224.713	1.216	166.404	1.216	203	1.216	235.6	1.216	227.03	1.216	152.552	1.216	305.155	1.216	1757.99	1.216	229.245	1.216	151.347	1.216	192.006	1.216	853.513
					21	1.28	358.501	1.28	3716.2	1.28	156.813	1.28	168.145	1.28	343.26	1.28	880.531	1.28	192.429	1.28	155.854	1.28	245.679	1.28	4243.41	1.28	238.114	1.28	163.927	NA	NA	NA	NA	1.28	236.927	1.28	157.464	1.28	326.858	1.28	1658.21	1.28	217.334	1.28	153.777	1.28	201.712	1.28	782.717
					22	1.344	362.236	1.344	3555.56	1.344	158.104	1.344	179.077	1.344	357.572	1.344	761.688	1.344	194.125	1.344	154.756	1.344	256.048	1.344	4267.07	1.344	236.385	1.344	151.345	NA	NA	NA	NA	1.344	213.37	1.344	165.683	1.344	354.781	1.344	1583.79	1.344	222.943	1.344	153.701	NA	NA	NA	NA
					23	1.408	364.702	1.408	3468.8	1.408	167.892	1.408	183.98	1.408	330.605	1.408	717.37	1.408	193.261	1.408	146.579	1.408	257.584	1.408	4139.09	1.408	226.764	1.408	151.674	NA	NA	NA	NA	1.408	223.276	1.408	153.106	1.408	372.661	1.408	1397.73	1.408	249.785	1.408	151.099	NA	NA	NA	NA
					24	1.472	387.242	1.472	3379.4	1.472	161.228	1.472	177.48	1.472	302.379	1.472	657.534	1.472	193.347	1.472	158.419	1.472	251.311	1.472	3627.81	1.472	227.049	1.472	161.788	NA	NA	NA	NA	1.472	228.443	1.472	144.149	1.472	382.075	1.472	1138.31	1.472	270.229	1.472	159.943	NA	NA	NA	NA
					25	1.536	387.325	1.536	3156.8	1.536	158.701	1.536	162.455	1.536	297.662	1.536	548.429	1.536	194.915	1.536	172.156	1.536	234.607	1.536	2797.46	1.536	235.978	1.536	168.54	NA	NA	NA	NA	1.536	217.63	1.536	141.613	1.536	379.313	1.536	894.674	1.536	251.727	1.536	171.664	NA	NA	NA	NA
					26	1.6	372.851	1.6	2881.2	1.6	172.756	1.6	159.676	1.6	308.774	1.6	423.199	1.6	198.735	1.6	180.169	1.6	226.176	1.6	1871.76	1.6	252.04	1.6	167.264	NA	NA	NA	NA	1.6	216.631	1.6	142.331	NA	NA	NA	NA	1.6	228.932	1.6	159.783	NA	NA	NA	NA
					27	1.664	339.397	1.664	2713.2	1.664	181.217	1.664	156.79	1.664	295.456	1.664	307.335	1.664	215.107	1.664	177.711	1.664	216.858	1.664	983.81	1.664	262.48	1.664	161.512	NA	NA	NA	NA	1.664	228.94	1.664	155.421	NA	NA	NA	NA	1.664	226.311	1.664	148.324	NA	NA	NA	NA
					28	1.728	300.759	1.728	2566.8	1.728	180.019	1.728	154.797	1.728	272.791	1.728	185.235	1.728	237.457	1.728	166.307	1.728	220.649	1.728	436.759	1.728	249.32	1.728	162.233	NA	NA	NA	NA	1.728	257.025	1.728	159.802	NA	NA	NA	NA	1.728	237.16	1.728	165.769	NA	NA	NA	NA
					29	1.792	246.597	1.792	2205.8	1.792	174.301	1.792	159.244	1.792	250.789	1.792	113.202	1.792	241.717	1.792	160.691	1.792	238.436	NA	NA	1.792	269.72	1.792	155.735	NA	NA	NA	NA	1.792	271.167	1.792	163.051	NA	NA	NA	NA	1.792	239.404	1.792	173.448	NA	NA	NA	NA
					30	1.856	182.96	1.856	1520.4	1.856	172.697	1.856	158.107	1.856	246.193	1.856	88.199	1.856	243.815	1.856	169.315	1.856	258.804	NA	NA	1.856	286.2	1.856	151.448	NA	NA	NA	NA	1.856	290.646	1.856	165.503	NA	NA	NA	NA	1.856	250.784	1.856	183.432	NA	NA	NA	NA
					31	NA	NA	1.92	NA	1.92	175	1.92	155.051	1.92	219.511	NA	NA	1.92	234.746	1.92	179.803	NA	NA	NA	NA	1.92	269.56	1.92	158.216	NA	NA	NA	NA	1.92	294.278	1.92	156.559	NA	NA	NA	NA	1.92	241.565	1.92	194.096	NA	NA	NA	NA
					32	NA	NA	1.984	NA	1.984	186.315	1.984	158.915	1.984	197.498	NA	NA	1.984	220.648	1.984	191.373	NA	NA	NA	NA	1.984	263.56	1.984	159.528	NA	NA	NA	NA	1.984	280.639	1.984	156.998	NA	NA	NA	NA	1.984	230.727	1.984	182.476	NA	NA	NA	NA
					33	NA	NA	2.048	NA	2.048	193.761	2.048	172.033	2.048	187.364	NA	NA	2.048	203.933	2.048	175.9	NA	NA	NA	NA	2.048	253.48	2.048	147.378	NA	NA	NA	NA	2.048	263.666	2.048	161.449	NA	NA	NA	NA	2.048	220.46	2.048	171.978	NA	NA	NA	NA
					34	NA	NA	2.112	NA	2.112	180.45	2.112	183.715	2.112	204.24	NA	NA	2.112	196.678	2.112	168.01	NA	NA	NA	NA	2.112	252.25	2.112	151.319	NA	NA	NA	NA	2.112	252.29	2.112	165.142	NA	NA	NA	NA	2.112	236.192	2.112	175.346	NA	NA	NA	NA
					35	NA	NA	2.176	NA	2.176	178.852	2.176	175.099	2.176	226.54	NA	NA	2.176	193.595	2.176	163.64	NA	NA	NA	NA	2.176	261	2.176	157.522	NA	NA	NA	NA	2.176	240.497	2.176	164.955	NA	NA	NA	NA	2.176	250.842	2.176	166.957	NA	NA	NA	NA
					36	NA	NA	2.24	NA	2.24	190.461	2.24	159.075	NA	NA	NA	NA	2.24	181.169	2.24	162.34	NA	NA	NA	NA	2.24	245.4	2.24	162.029	NA	NA	NA	NA	2.24	235.29	2.24	158.797	NA	NA	NA	NA	2.24	225	2.24	143.197	NA	NA	NA	NA
					37	NA	NA	2.304	NA	2.304	184.432	2.304	161.774	NA	NA	NA	NA	2.304	186.233	2.304	169.03	NA	NA	NA	NA	2.304	238.95	2.304	164.267	NA	NA	NA	NA	2.304	243.921	2.304	156.268	NA	NA	NA	NA	2.304	247.969	2.304	137.829	NA	NA	NA	NA
					38	NA	NA	2.368	NA	2.368	176.185	2.368	169.867	NA	NA	NA	NA	2.368	186.812	2.368	165.97	NA	NA	NA	NA	2.368	243.25	2.368	164.248	NA	NA	NA	NA	2.368	251.698	2.368	155.369	NA	NA	NA	NA	2.368	243.763	2.368	146.321	NA	NA	NA	NA
					39	NA	NA	2.432	NA	2.432	172.336	2.432	170.647	NA	NA	NA	NA	2.432	184.987	2.432	154.29	NA	NA	NA	NA	2.432	242.4	2.432	166.746	NA	NA	NA	NA	2.432	243.623	2.432	159.91	NA	NA	NA	NA	2.432	219.484	2.432	148.705	NA	NA	NA	NA
					40	NA	NA	2.496	NA	2.496	170.34	2.496	166.762	NA	NA	NA	NA	2.496	184.221	2.496	157.37	NA	NA	NA	NA	2.496	241.65	2.496	168.441	NA	NA	NA	NA	2.496	214.946	2.496	169.486	NA	NA	NA	NA	2.496	196.49	2.496	150.786	NA	NA	NA	NA
					41	NA	NA	2.56	NA	2.56	156.833	2.56	164.618	NA	NA	NA	NA	2.56	175.407	2.56	155.012	NA	NA	NA	NA	2.56	232.9	2.56	163.874	NA	NA	NA	NA	2.56	193.559	2.56	163.216	NA	NA	NA	NA	2.56	210.468	2.56	155.582	NA	NA	NA	NA
					42	NA	NA	2.624	NA	2.624	157.883	2.624	167.724	NA	NA	NA	NA	2.624	164.126	2.624	159.574	NA	NA	NA	NA	2.624	215	2.624	148.196	NA	NA	NA	NA	2.624	193	2.624	165.268	NA	NA	NA	NA	2.624	216.208	2.624	162.358	NA	NA	NA	NA
					43	NA	NA	2.688	NA	2.688	164.9	2.688	170.832	NA	NA	NA	NA	2.688	166.11	2.688	166.296	NA	NA	NA	NA	2.688	202.15	2.688	150.519	NA	NA	NA	NA	2.688	213.391	2.688	153.289	NA	NA	NA	NA	2.688	212.561	2.688	177.452	NA	NA	NA	NA
					44	NA	NA	2.752	NA	2.752	176.718	2.752	172.445	NA	NA	NA	NA	2.752	182.06	2.752	168.312	NA	NA	NA	NA	2.752	202.25	2.752	156.186	NA	NA	NA	NA	2.752	209.485	2.752	152.822	NA	NA	NA	NA	2.752	223.919	2.752	180.366	NA	NA	NA	NA
					45	NA	NA	2.816	NA	2.816	183.981	2.816	164.801	NA	NA	NA	NA	2.816	185.318	2.816	171.855	NA	NA	NA	NA	2.816	215.256	2.816	159.196	NA	NA	NA	NA	2.816	208.099	2.816	167.394	NA	NA	NA	NA	2.816	215.346	2.816	168.506	NA	NA	NA	NA
					46	NA	NA	2.88	NA	2.88	180.238	2.88	153.861	NA	NA	NA	NA	2.88	191.275	2.88	176.918	NA	NA	NA	NA	2.88	208.066	2.88	158.649	NA	NA	NA	NA	2.88	238.466	2.88	180.726	NA	NA	NA	NA	2.88	172.946	2.88	175.983	NA	NA	NA	NA
					47	NA	NA	2.944	NA	2.944	171.893	2.944	149.004	NA	NA	NA	NA	2.944	197.517	2.944	179.899	NA	NA	NA	NA	2.944	206.865	2.944	162.077	NA	NA	NA	NA	2.944	240.124	2.944	172.848	NA	NA	NA	NA	2.944	149.446	2.944	184.762	NA	NA	NA	NA
					48	NA	NA	3.008	NA	3.008	170.044	3.008	152.177	NA	NA	NA	NA	3.008	192.616	3.008	177.396	NA	NA	NA	NA	3.008	205.085	3.008	168.09	NA	NA	NA	NA	3.008	241.75	3.008	164.441	NA	NA	NA	NA	3.008	165.779	3.008	181.688	NA	NA	NA	NA
					49	NA	NA	3.072	NA	3.072	166.101	3.072	153.65	NA	NA	NA	NA	3.072	193.487	3.072	176.511	NA	NA	NA	NA	3.072	198.141	3.072	160.957	NA	NA	NA	NA	3.072	256.709	3.072	169.688	NA	NA	NA	NA	3.072	185.994	3.072	169.802	NA	NA	NA	NA
					50	NA	NA	3.136	NA	3.136	160.223	3.136	157.03	NA	NA	NA	NA	3.136	194.949	3.136	173.784	NA	NA	NA	NA	3.136	201.013	3.136	146.349	NA	NA	NA	NA	3.136	268.903	3.136	171.861	NA	NA	NA	NA	3.136	197.881	3.136	157.875	NA	NA	NA	NA
					51	NA	NA	3.2	NA	3.2	156.66	3.2	163.449	NA	NA	NA	NA	3.2	185.58	3.2	155.297	NA	NA	NA	NA	3.2	211.554	3.2	139.246	NA	NA	NA	NA	3.2	260.503	3.2	171.418	NA	NA	NA	NA	3.2	203.982	3.2	150.109	NA	NA	NA	NA
					52	NA	NA	3.264	NA	3.264	171.25	3.264	160.777	NA	NA	NA	NA	3.264	176.659	3.264	142.681	NA	NA	NA	NA	3.264	223.066	3.264	147.748	NA	NA	NA	NA	3.264	239.35	3.264	168.305	NA	NA	NA	NA	3.264	213.691	3.264	146.38	NA	NA	NA	NA
					53	NA	NA	3.328	NA	3.328	181.057	3.328	149.595	NA	NA	NA	NA	3.328	179.891	3.328	141.558	NA	NA	NA	NA	3.328	234.531	3.328	156.895	NA	NA	NA	NA	3.328	224.75	3.328	166.055	NA	NA	NA	NA	3.328	223.496	3.328	149.629	NA	NA	NA	NA
					54	NA	NA	3.392	NA	3.392	178.799	3.392	148.721	NA	NA	NA	NA	3.392	191.465	3.392	163.044	NA	NA	NA	NA	3.392	228.847	3.392	167.453	NA	NA	NA	NA	3.392	223.26	3.392	171.165	NA	NA	NA	NA	3.392	215.48	3.392	156.892	NA	NA	NA	NA
					55	NA	NA	3.456	NA	3.456	190.722	3.456	167.223	NA	NA	NA	NA	3.456	202.542	3.456	173.42	NA	NA	NA	NA	3.456	206.212	3.456	172.639	NA	NA	NA	NA	3.456	232.641	3.456	174.902	NA	NA	NA	NA	3.456	190.306	3.456	161.526	NA	NA	NA	NA
					56	NA	NA	3.52	NA	3.52	202.052	3.52	179.547	NA	NA	NA	NA	3.52	210.541	3.52	160.967	NA	NA	NA	NA	3.52	200.94	3.52	168.009	NA	NA	NA	NA	3.52	244.695	3.52	172.597	NA	NA	NA	NA	3.52	183.135	3.52	153.655	NA	NA	NA	NA
					57	NA	NA	3.584	NA	3.584	196.938	3.584	183.029	NA	NA	NA	NA	3.584	218.087	3.584	160.231	NA	NA	NA	NA	3.584	208.419	3.584	158.616	NA	NA	NA	NA	3.584	254.123	3.584	166.113	NA	NA	NA	NA	3.584	202.012	3.584	151.749	NA	NA	NA	NA
					58	NA	NA	3.648	NA	3.648	184.958	3.648	176.687	NA	NA	NA	NA	3.648	201.633	3.648	165.496	NA	NA	NA	NA	3.648	227.075	3.648	147.216	NA	NA	NA	NA	3.648	277.59	3.648	155.726	NA	NA	NA	NA	3.648	227.854	3.648	163.591	NA	NA	NA	NA
					59	NA	NA	3.712	NA	3.712	174	3.712	169.282	NA	NA	NA	NA	3.712	206.515	3.712	172.161	NA	NA	NA	NA	3.712	224.97	3.712	146.395	NA	NA	NA	NA	3.712	292.706	3.712	153.44	NA	NA	NA	NA	3.712	238.591	3.712	176.438	NA	NA	NA	NA
					60	NA	NA	3.776	NA	3.776	167	3.776	172.011	NA	NA	NA	NA	3.776	216.027	3.776	162.077	NA	NA	NA	NA	3.776	218.223	3.776	155.416	NA	NA	NA	NA	3.776	283.539	3.776	162.311	NA	NA	NA	NA	3.776	217.968	3.776	173.298	NA	NA	NA	NA
					61	NA	NA	3.84	NA	3.84	171	3.84	180.171	NA	NA	NA	NA	3.84	210.008	3.84	154.124	NA	NA	NA	NA	3.84	203.084	3.84	159.134	NA	NA	NA	NA	3.84	265.06	3.84	160.666	NA	NA	NA	NA	3.84	210.181	3.84	158.25	NA	NA	NA	NA
					62	NA	NA	3.904	NA	3.904	181	3.904	187.415	NA	NA	NA	NA	3.904	205.689	3.904	147.947	NA	NA	NA	NA	3.904	203.308	3.904	156.958	NA	NA	NA	NA	3.904	244.046	3.904	159.277	NA	NA	NA	NA	3.904	226.083	3.904	151.575	NA	NA	NA	NA
					63	NA	NA	3.968	NA	3.968	191	3.968	173.14	NA	NA	NA	NA	3.968	208.529	3.968	154.286	NA	NA	NA	NA	3.968	219.966	3.968	148.689	NA	NA	NA	NA	3.968	233.931	3.968	170.646	NA	NA	NA	NA	3.968	219.914	3.968	161.513	NA	NA	NA	NA
					64	NA	NA	4.032	NA	4.032	190.5	4.032	163.225	NA	NA	NA	NA	4.032	202.639	4.032	155.137	NA	NA	NA	NA	NA	NA	4.032	138.793	NA	NA	NA	NA	4.032	234.839	4.032	172.787	NA	NA	NA	NA	4.032	204.036	4.032	177.673	NA	NA	NA	NA
					65	NA	NA	4.096	NA	4.096	179	4.096	158.444	NA	NA	NA	NA	4.096	196.046	4.096	151.027	NA	NA	NA	NA	NA	NA	4.096	133.297	NA	NA	NA	NA	4.096	230.408	4.096	162.83	NA	NA	NA	NA	4.096	198.325	4.096	187.514	NA	NA	NA	NA
					66	NA	NA	4.16	NA	4.16	175	4.16	156.623	NA	NA	NA	NA	4.16	203.443	4.16	160.557	NA	NA	NA	NA	NA	NA	4.16	142.115	NA	NA	NA	NA	4.16	225.726	4.16	166.14	NA	NA	NA	NA	4.16	215.7	4.16	183.225	NA	NA	NA	NA
					67	NA	NA	4.224	NA	4.224	180.5	4.224	158.404	NA	NA	NA	NA	4.224	206.543	4.224	166.178	NA	NA	NA	NA	NA	NA	4.224	166.191	NA	NA	NA	NA	4.224	223.257	4.224	176.122	NA	NA	NA	NA	4.224	199.329	4.224	174.907	NA	NA	NA	NA
					68	NA	NA	4.288	NA	4.288	186.5	4.288	170.866	NA	NA	NA	NA	4.288	200.018	4.288	159.8	NA	NA	NA	NA	NA	NA	4.288	155.361	NA	NA	NA	NA	4.288	218.819	4.288	172.403	NA	NA	NA	NA	4.288	188.397	4.288	176.057	NA	NA	NA	NA
					69	NA	NA	4.352	NA	4.352	185	4.352	171.039	NA	NA	NA	NA	4.352	205.424	4.352	154.263	NA	NA	NA	NA	NA	NA	4.352	143.931	NA	NA	NA	NA	4.352	228.186	4.352	166.805	NA	NA	NA	NA	4.352	219.052	4.352	168.216	NA	NA	NA	NA
					70	NA	NA	4.416	NA	4.416	176.5	4.416	177.553	NA	NA	NA	NA	4.416	216.309	4.416	152.908	NA	NA	NA	NA	NA	NA	4.416	141.794	NA	NA	NA	NA	4.416	231.101	4.416	162.419	NA	NA	NA	NA	4.416	223.095	4.416	161.106	NA	NA	NA	NA
					71	NA	NA	4.48	NA	4.48	169	4.48	174.598	NA	NA	NA	NA	4.48	225.386	4.48	144.193	NA	NA	NA	NA	NA	NA	4.48	152.359	NA	NA	NA	NA	4.48	230.6	4.48	152.666	NA	NA	NA	NA	4.48	209.081	4.48	162.669	NA	NA	NA	NA
					72	NA	NA	4.544	NA	4.544	165	4.544	157.576	NA	NA	NA	NA	4.544	226.4	4.544	142.222	NA	NA	NA	NA	NA	NA	4.544	158.783	NA	NA	NA	NA	4.544	242.062	4.544	145.948	NA	NA	NA	NA	4.544	228.584	4.544	172.464	NA	NA	NA	NA
					73	NA	NA	4.608	NA	4.608	169.521	4.608	133.577	NA	NA	NA	NA	4.608	214.573	4.608	148.311	NA	NA	NA	NA	NA	NA	4.608	164.347	NA	NA	NA	NA	4.608	257.552	4.608	146.25	NA	NA	NA	NA	4.608	227.057	4.608	180.388	NA	NA	NA	NA
					74	NA	NA	4.672	NA	4.672	171.453	4.672	127.84	NA	NA	NA	NA	4.672	191.263	4.672	153.33	NA	NA	NA	NA	NA	NA	4.672	174.987	NA	NA	NA	NA	4.672	273.338	4.672	145.8	NA	NA	NA	NA	4.672	185.546	4.672	167.197	NA	NA	NA	NA
					75	NA	NA	4.736	NA	4.736	165.323	4.736	144.091	NA	NA	NA	NA	4.736	177.795	4.736	165.044	NA	NA	NA	NA	NA	NA	4.736	173.636	NA	NA	NA	NA	4.736	258.682	4.736	157.65	NA	NA	NA	NA	4.736	161.855	4.736	139.496	NA	NA	NA	NA
					76	NA	NA	4.8	NA	4.8	159.747	4.8	151.991	NA	NA	NA	NA	4.8	183.173	4.8	173.453	NA	NA	NA	NA	NA	NA	4.8	158.899	NA	NA	NA	NA	4.8	224.423	4.8	168.95	NA	NA	NA	NA	4.8	184.148	4.8	152.907	NA	NA	NA	NA
					77	NA	NA	4.864	NA	4.864	161.796	4.864	155.439	NA	NA	NA	NA	4.864	180.016	4.864	175.607	NA	NA	NA	NA	NA	NA	4.864	157.893	NA	NA	NA	NA	4.864	234.281	4.864	161.05	NA	NA	NA	NA	4.864	199.198	4.864	163.622	NA	NA	NA	NA
					78	NA	NA	4.928	NA	4.928	165.166	4.928	161.468	NA	NA	NA	NA	4.928	188.68	4.928	192.248	NA	NA	NA	NA	NA	NA	4.928	158.046	NA	NA	NA	NA	NA	NA	4.928	151.05	NA	NA	NA	NA	4.928	204.49	4.928	166.796	NA	NA	NA	NA
					79	NA	NA	4.992	NA	4.992	156.476	4.992	161.32	NA	NA	NA	NA	4.992	200.992	4.992	168.745	NA	NA	NA	NA	NA	NA	4.992	154.421	NA	NA	NA	NA	NA	NA	4.992	153.7	NA	NA	NA	NA	4.992	207.592	4.992	173.367	NA	NA	NA	NA
					80	NA	NA	5.056	NA	5.056	163.812	5.056	166.409	NA	NA	NA	NA	5.056	215.147	5.056	144.108	NA	NA	NA	NA	NA	NA	5.056	150.73	NA	NA	NA	NA	NA	NA	5.056	155	NA	NA	NA	NA	5.056	210.482	5.056	165.65	NA	NA	NA	NA
					81	NA	NA	5.12	NA	5.12	175.97	5.12	173.585	NA	NA	NA	NA	5.12	227.671	5.12	149.178	NA	NA	NA	NA	NA	NA	5.12	156.799	NA	NA	NA	NA	NA	NA	5.12	156.05	NA	NA	NA	NA	5.12	219.957	5.12	170.445	NA	NA	NA	NA
					82	NA	NA	5.184	NA	5.184	177.903	5.184	165.474	NA	NA	NA	NA	5.184	235.186	5.184	158.421	NA	NA	NA	NA	NA	NA	5.184	170.42	NA	NA	NA	NA	NA	NA	5.184	153.45	NA	NA	NA	NA	5.184	197.293	5.184	185.32	NA	NA	NA	NA
					83	NA	NA	5.248	NA	5.248	165.429	5.248	155.448	NA	NA	NA	NA	NA	NA	5.248	153.581	NA	NA	NA	NA	NA	NA	5.248	171.346	NA	NA	NA	NA	NA	NA	5.248	143.25	NA	NA	NA	NA	5.248	207.377	5.248	178.019	NA	NA	NA	NA
					84	NA	NA	5.312	NA	5.312	NA	5.312	150.356	NA	NA	NA	NA	NA	NA	5.312	148.28	NA	NA	NA	NA	NA	NA	5.312	168.257	NA	NA	NA	NA	NA	NA	5.312	147.7	NA	NA	NA	NA	5.312	211.765	5.312	166.006	NA	NA	NA	NA
					85	NA	NA	5.376	NA	5.376	NA	5.376	151.333	NA	NA	NA	NA	NA	NA	5.376	150.976	NA	NA	NA	NA	NA	NA	5.376	149.758	NA	NA	NA	NA	NA	NA	5.376	166.9	NA	NA	NA	NA	NA	NA	5.376	172.719	NA	NA	NA	NA
					86	NA	NA	5.44	NA	5.44	NA	5.44	159.548	NA	NA	NA	NA	NA	NA	5.44	146.102	NA	NA	NA	NA	NA	NA	5.44	148.895	NA	NA	NA	NA	NA	NA	5.44	170.75	NA	NA	NA	NA	NA	NA	5.44	169.901	NA	NA	NA	NA
					87	NA	NA	5.504	NA	5.504	NA	5.504	164.919	NA	NA	NA	NA	NA	NA	NA	NA	NA	NA	NA	NA	NA	NA	5.504	155.08	NA	NA	NA	NA	NA	NA	5.504	157.5	NA	NA	NA	NA	NA	NA	5.504	151.675	NA	NA	NA	NA
					88	NA	NA	5.568	NA	5.568	NA	5.568	165.597	NA	NA	NA	NA	NA	NA	NA	NA	NA	NA	NA	NA	NA	NA	5.568	166.348	NA	NA	NA	NA	NA	NA	5.568	151.35	NA	NA	NA	NA	NA	NA	5.568	152.852	NA	NA	NA	NA
					89	NA	NA	5.632	NA	5.632	NA	5.632	165.337	NA	NA	NA	NA	NA	NA	NA	NA	NA	NA	NA	NA	NA	NA	5.632	168.146	NA	NA	NA	NA	NA	NA	5.632	157.6	NA	NA	NA	NA	NA	NA	5.632	158.259	NA	NA	NA	NA
					90	NA	NA	5.696	NA	5.696	NA	5.696	170.876	NA	NA	NA	NA	NA	NA	NA	NA	NA	NA	NA	NA	NA	NA	5.696	158.376	NA	NA	NA	NA	NA	NA	5.696	170.45	NA	NA	NA	NA	NA	NA	5.696	142.675	NA	NA	NA	NA
					91	NA	NA	5.76	NA	5.76	NA	5.76	168.066	NA	NA	NA	NA	NA	NA	NA	NA	NA	NA	NA	NA	NA	NA	5.76	159.477	NA	NA	NA	NA	NA	NA	5.76	172.55	NA	NA	NA	NA	NA	NA	5.76	138.679	NA	NA	NA	NA
					92	NA	NA	5.824	NA	5.824	NA	5.824	168.287	NA	NA	NA	NA	NA	NA	NA	NA	NA	NA	NA	NA	NA	NA	5.824	160.484	NA	NA	NA	NA	NA	NA	5.824	166.6	NA	NA	NA	NA	NA	NA	5.824	163.354	NA	NA	NA	NA
					93	NA	NA	5.888	NA	5.888	NA	5.888	168.985	NA	NA	NA	NA	NA	NA	NA	NA	NA	NA	NA	NA	NA	NA	NA	NA	NA	NA	NA	NA	NA	NA	5.888	164.7	NA	NA	NA	NA	NA	NA	5.888	157.102	NA	NA	NA	NA
					94	NA	NA	5.952	NA	5.952	NA	5.952	174.33	NA	NA	NA	NA	NA	NA	NA	NA	NA	NA	NA	NA	NA	NA	NA	NA	NA	NA	NA	NA	NA	NA	5.952	164.87	NA	NA	NA	NA	NA	NA	5.952	149.702	NA	NA	NA	NA
					95	NA	NA	6.016	NA	6.016	NA	6.016	176.102	NA	NA	NA	NA	NA	NA	NA	NA	NA	NA	NA	NA	NA	NA	NA	NA	NA	NA	NA	NA	NA	NA	6.016	163.098	NA	NA	NA	NA	NA	NA	6.016	155.649	NA	NA	NA	NA
					96	NA	NA	6.08	NA	6.08	NA	6.08	168.522	NA	NA	NA	NA	NA	NA	NA	NA	NA	NA	NA	NA	NA	NA	NA	NA	NA	NA	NA	NA	NA	NA	6.08	160.025	NA	NA	NA	NA	NA	NA	6.08	156.702	NA	NA	NA	NA
					97	NA	NA	6.144	NA	6.144	NA	6.144	174.377	NA	NA	NA	NA	NA	NA	NA	NA	NA	NA	NA	NA	NA	NA	NA	NA	NA	NA	NA	NA	NA	NA	6.144	159.237	NA	NA	NA	NA	NA	NA	6.144	149.098	NA	NA	NA	NA
					98	NA	NA	6.208	NA	6.208	NA	6.208	172.158	NA	NA	NA	NA	NA	NA	NA	NA	NA	NA	NA	NA	NA	NA	NA	NA	NA	NA	NA	NA	NA	NA	6.208	157.657	NA	NA	NA	NA	NA	NA	6.208	143.053	NA	NA	NA	NA
					99	NA	NA	6.272	NA	6.272	NA	6.272	164.948	NA	NA	NA	NA	NA	NA	NA	NA	NA	NA	NA	NA	NA	NA	NA	NA	NA	NA	NA	NA	NA	NA	6.272	163.177	NA	NA	NA	NA	NA	NA	6.272	157.509	NA	NA	NA	NA
					100	NA	NA	6.336	NA	6.336	NA	6.336	170.736	NA	NA	NA	NA	NA	NA	NA	NA	NA	NA	NA	NA	NA	NA	NA	NA	NA	NA	NA	NA	NA	NA	6.336	162.324	NA	NA	NA	NA	NA	NA	6.336	180.557	NA	NA	NA	NA
					101	NA	NA	6.4	NA	6.4	NA	6.4	179.315	NA	NA	NA	NA	NA	NA	NA	NA	NA	NA	NA	NA	NA	NA	NA	NA	NA	NA	NA	NA	NA	NA	6.4	162.589	NA	NA	NA	NA	NA	NA	6.4	192.333	NA	NA	NA	NA
					102	NA	NA	6.464	NA	6.464	NA	6.464	170.629	NA	NA	NA	NA	NA	NA	NA	NA	NA	NA	NA	NA	NA	NA	NA	NA	NA	NA	NA	NA	NA	NA	6.464	164.463	NA	NA	NA	NA	NA	NA	6.464	186.119	NA	NA	NA	NA
					103	NA	NA	6.528	NA	6.528	NA	6.528	160.954	NA	NA	NA	NA	NA	NA	NA	NA	NA	NA	NA	NA	NA	NA	NA	NA	NA	NA	NA	NA	NA	NA	6.528	167.948	NA	NA	NA	NA	NA	NA	6.528	171.32	NA	NA	NA	NA
					104	NA	NA	6.592	NA	6.592	NA	6.592	160.56	NA	NA	NA	NA	NA	NA	NA	NA	NA	NA	NA	NA	NA	NA	NA	NA	NA	NA	NA	NA	NA	NA	6.592	158.68	NA	NA	NA	NA	NA	NA	6.592	166.486	NA	NA	NA	NA
					105	NA	NA	6.656	NA	6.656	NA	6.656	165.196	NA	NA	NA	NA	NA	NA	NA	NA	NA	NA	NA	NA	NA	NA	NA	NA	NA	NA	NA	NA	NA	NA	6.656	163.128	NA	NA	NA	NA	NA	NA	6.656	156.358	NA	NA	NA	NA
					106	NA	NA	6.72	NA	6.72	NA	6.72	169.518	NA	NA	NA	NA	NA	NA	NA	NA	NA	NA	NA	NA	NA	NA	NA	NA	NA	NA	NA	NA	NA	NA	6.72	178.232	NA	NA	NA	NA	NA	NA	6.72	142.145	NA	NA	NA	NA
					107	NA	NA	6.784	NA	6.784	NA	6.784	159.66	NA	NA	NA	NA	NA	NA	NA	NA	NA	NA	NA	NA	NA	NA	NA	NA	NA	NA	NA	NA	NA	NA	6.784	165.134	NA	NA	NA	NA	NA	NA	6.784	128.834	NA	NA	NA	NA
					108	NA	NA	6.848	NA	6.848	NA	6.848	149.218	NA	NA	NA	NA	NA	NA	NA	NA	NA	NA	NA	NA	NA	NA	NA	NA	NA	NA	NA	NA	NA	NA	6.848	148.011	NA	NA	NA	NA	NA	NA	6.848	123.075	NA	NA	NA	NA
					109	NA	NA	6.912	NA	6.912	NA	6.912	146.921	NA	NA	NA	NA	NA	NA	NA	NA	NA	NA	NA	NA	NA	NA	NA	NA	NA	NA	NA	NA	NA	NA	6.912	146.966	NA	NA	NA	NA	NA	NA	6.912	140.368	NA	NA	NA	NA
					110	NA	NA	6.976	NA	6.976	NA	6.976	155.263	NA	NA	NA	NA	NA	NA	NA	NA	NA	NA	NA	NA	NA	NA	NA	NA	NA	NA	NA	NA	NA	NA	6.976	155.988	NA	NA	NA	NA	NA	NA	6.976	160.169	NA	NA	NA	NA
					111	NA	NA	7.04	NA	7.04	NA	7.04	162.405	NA	NA	NA	NA	NA	NA	NA	NA	NA	NA	NA	NA	NA	NA	NA	NA	NA	NA	NA	NA	NA	NA	7.04	166.288	NA	NA	NA	NA	NA	NA	7.04	165.625	NA	NA	NA	NA
					112	NA	NA	7.104	NA	7.104	NA	7.104	164.807	NA	NA	NA	NA	NA	NA	NA	NA	NA	NA	NA	NA	NA	NA	NA	NA	NA	NA	NA	NA	NA	NA	7.104	173.641	NA	NA	NA	NA	NA	NA	7.104	173.186	NA	NA	NA	NA
					113	NA	NA	7.168	NA	7.168	NA	7.168	177.476	NA	NA	NA	NA	NA	NA	NA	NA	NA	NA	NA	NA	NA	NA	NA	NA	NA	NA	NA	NA	NA	NA	7.168	159.849	NA	NA	NA	NA	NA	NA	7.168	184.285	NA	NA	NA	NA
					114	NA	NA	7.232	NA	7.232	NA	7.232	176.016	NA	NA	NA	NA	NA	NA	NA	NA	NA	NA	NA	NA	NA	NA	NA	NA	NA	NA	NA	NA	NA	NA	7.232	149.486	NA	NA	NA	NA	NA	NA	7.232	186.154	NA	NA	NA	NA
					115	NA	NA	7.296	NA	7.296	NA	7.296	171.13	NA	NA	NA	NA	NA	NA	NA	NA	NA	NA	NA	NA	NA	NA	NA	NA	NA	NA	NA	NA	NA	NA	7.296	165.747	NA	NA	NA	NA	NA	NA	7.296	167.409	NA	NA	NA	NA
					116	NA	NA	7.36	NA	7.36	NA	7.36	161.779	NA	NA	NA	NA	NA	NA	NA	NA	NA	NA	NA	NA	NA	NA	NA	NA	NA	NA	NA	NA	NA	NA	7.36	179.768	NA	NA	NA	NA	NA	NA	NA	NA	NA	NA	NA	NA
					117	NA	NA	7.424	NA	7.424	NA	7.424	159.576	NA	NA	NA	NA	NA	NA	NA	NA	NA	NA	NA	NA	NA	NA	NA	NA	NA	NA	NA	NA	NA	NA	7.424	176.462	NA	NA	NA	NA	NA	NA	NA	NA	NA	NA	NA	NA
					118	NA	NA	7.488	NA	7.488	NA	7.488	162.375	NA	NA	NA	NA	NA	NA	NA	NA	NA	NA	NA	NA	NA	NA	NA	NA	NA	NA	NA	NA	NA	NA	NA	NA	NA	NA	NA	NA	NA	NA	NA	NA	NA	NA	NA	NA
					119	NA	NA	7.552	NA	7.552	NA	7.552	173.573	NA	NA	NA	NA	NA	NA	NA	NA	NA	NA	NA	NA	NA	NA	NA	NA	NA	NA	NA	NA	NA	NA	NA	NA	NA	NA	NA	NA	NA	NA	NA	NA	NA	NA	NA	NA
					120	NA	NA	7.616	NA	7.616	NA	7.616	169.23	NA	NA	NA	NA	NA	NA	NA	NA	NA	NA	NA	NA	NA	NA	NA	NA	NA	NA	NA	NA	NA	NA	NA	NA	NA	NA	NA	NA	NA	NA	NA	NA	NA	NA	NA	NA
					121	NA	NA	7.68	NA	7.68	NA	7.68	153.123	NA	NA	NA	NA	NA	NA	NA	NA	NA	NA	NA	NA	NA	NA	NA	NA	NA	NA	NA	NA	NA	NA	NA	NA	NA	NA	NA	NA	NA	NA	NA	NA	NA	NA	NA	NA
					122	NA	NA	NA	NA	NA	NA	7.744	161.896	NA	NA	NA	NA	NA	NA	NA	NA	NA	NA	NA	NA	NA	NA	NA	NA	NA	NA	NA	NA	NA	NA	NA	NA	NA	NA	NA	NA	NA	NA	NA	NA	NA	NA	NA	NA
					123	NA	NA	NA	NA	NA	NA	7.808	175.568	NA	NA	NA	NA	NA	NA	NA	NA	NA	NA	NA	NA	NA	NA	NA	NA	NA	NA	NA	NA	NA	NA	NA	NA	NA	NA	NA	NA	NA	NA	NA	NA	NA	NA	NA	NA
					124	NA	NA	NA	NA	NA	NA	7.872	167.78	NA	NA	NA	NA	NA	NA	NA	NA	NA	NA	NA	NA	NA	NA	NA	NA	NA	NA	NA	NA	NA	NA	NA	NA	NA	NA	NA	NA	NA	NA	NA	NA	NA	NA	NA	NA
					125	NA	NA	NA	NA	NA	NA	7.936	159.373	NA	NA	NA	NA	NA	NA	NA	NA	NA	NA	NA	NA	NA	NA	NA	NA	NA	NA	NA	NA	NA	NA	NA	NA	NA	NA	NA	NA	NA	NA	NA	NA	NA	NA	NA	NA
					126	NA	NA	NA	NA	NA	NA	8	165.912	NA	NA	NA	NA	NA	NA	NA	NA	NA	NA	NA	NA	NA	NA	NA	NA	NA	NA	NA	NA	NA	NA	NA	NA	NA	NA	NA	NA	NA	NA	NA	NA	NA	NA	NA	NA
					127	NA	NA	NA	NA	NA	NA	8.064	180.787	NA	NA	NA	NA	NA	NA	NA	NA	NA	NA	NA	NA	NA	NA	NA	NA	NA	NA	NA	NA	NA	NA	NA	NA	NA	NA	NA	NA	NA	NA	NA	NA	NA	NA	NA	NA
					128	NA	NA	NA	NA	NA	NA	8.128	167.447	NA	NA	NA	NA	NA	NA	NA	NA	NA	NA	NA	NA	NA	NA	NA	NA	NA	NA	NA	NA	NA	NA	NA	NA	NA	NA	NA	NA	NA	NA	NA	NA	NA	NA	NA	NA
					129	NA	NA	NA	NA	NA	NA	NA	NA	NA	NA	NA	NA	NA	NA	NA	NA	NA	NA	NA	NA	NA	NA	NA	NA	NA	NA	NA	NA	NA	NA	NA	NA	NA	NA	NA	NA	NA	NA	NA	NA	NA	NA	NA	NA
					130	NA	NA	NA	NA	NA	NA	NA	NA	NA	NA	NA	NA	NA	NA	NA	NA	NA	NA	NA	NA	NA	NA	NA	NA	NA	NA	NA	NA	NA	NA	NA	NA	NA	NA	NA	NA	NA	NA	NA	NA	NA	NA	NA	NA
					131	NA	NA	NA	NA	NA	NA	NA	NA	NA	NA	NA	NA	NA	NA	NA	NA	NA	NA	NA	NA	NA	NA	NA	NA	NA	NA	NA	NA	NA	NA	NA	NA	NA	NA	NA	NA	NA	NA	NA	NA	NA	NA	NA	NA
					132	NA	NA	NA	NA	NA	NA	NA	NA	NA	NA	NA	NA	NA	NA	NA	NA	NA	NA	NA	NA	NA	NA	NA	NA	NA	NA	NA	NA	NA	NA	NA	NA	NA	NA	NA	NA	NA	NA	NA	NA	NA	NA	NA	NA
					133	NA	NA	NA	NA	NA	NA	NA	NA	NA	NA	NA	NA	NA	NA	NA	NA	NA	NA	NA	NA	NA	NA	NA	NA	NA	NA	NA	NA	NA	NA	NA	NA	NA	NA	NA	NA	NA	NA	NA	NA	NA	NA	NA	NA
					134	NA	NA	NA	NA	NA	NA	NA	NA	NA	NA	NA	NA	NA	NA	NA	NA	NA	NA	NA	NA	NA	NA	NA	NA	NA	NA	NA	NA	NA	NA	NA	NA	NA	NA	NA	NA	NA	NA	NA	NA	NA	NA	NA	NA
					135	NA	NA	NA	NA	NA	NA	NA	NA	NA	NA	NA	NA	NA	NA	NA	NA	NA	NA	NA	NA	NA	NA	NA	NA	NA	NA	NA	NA	NA	NA	NA	NA	NA	NA	NA	NA	NA	NA	NA	NA	NA	NA	NA	NA
					136	NA	NA	NA	NA	NA	NA	NA	NA	NA	NA	NA	NA	NA	NA	NA	NA	NA	NA	NA	NA	NA	NA	NA	NA	NA	NA	NA	NA	NA	NA	NA	NA	NA	NA	NA	NA	NA	NA	NA	NA	NA	NA	NA	NA
					137	NA	NA	NA	NA	NA	NA	NA	NA	NA	NA	NA	NA	NA	NA	NA	NA	NA	NA	NA	NA	NA	NA	NA	NA	NA	NA	NA	NA	NA	NA	NA	NA	NA	NA	NA	NA	NA	NA	NA	NA	NA	NA	NA	NA
					138	NA	NA	NA	NA	NA	NA	NA	NA	NA	NA	NA	NA	NA	NA	NA	NA	NA	NA	NA	NA	NA	NA	NA	NA	NA	NA	NA	NA	NA	NA	NA	NA	NA	NA	NA	NA	NA	NA	NA	NA	NA	NA	NA	NA
					139	NA	NA	NA	NA	NA	NA	NA	NA	NA	NA	NA	NA	NA	NA	NA	NA	NA	NA	NA	NA	NA	NA	NA	NA	NA	NA	NA	NA	NA	NA	NA	NA	NA	NA	NA	NA	NA	NA	NA	NA	NA	NA	NA	NA
					140	NA	NA	NA	NA	NA	NA	NA	NA	NA	NA	NA	NA	NA	NA	NA	NA	NA	NA	NA	NA	NA	NA	NA	NA	NA	NA	NA	NA	NA	NA	NA	NA	NA	NA	NA	NA	NA	NA	NA	NA	NA	NA	NA	NA
					141	NA	NA	NA	NA	NA	NA	NA	NA	NA	NA	NA	NA	NA	NA	NA	NA	NA	NA	NA	NA	NA	NA	NA	NA	NA	NA	NA	NA	NA	NA	NA	NA	NA	NA	NA	NA	NA	NA	NA	NA	NA	NA	NA	NA
					142	NA	NA	NA	NA	NA	NA	NA	NA	NA	NA	NA	NA	NA	NA	NA	NA	NA	NA	NA	NA	NA	NA	NA	NA	NA	NA	NA	NA	NA	NA	NA	NA	NA	NA	NA	NA	NA	NA	NA	NA	NA	NA	NA	NA
					143	NA	NA	NA	NA	NA	NA	NA	NA	NA	NA	NA	NA	NA	NA	NA	NA	NA	NA	NA	NA	NA	NA	NA	NA	NA	NA	NA	NA	NA	NA	NA	NA	NA	NA	NA	NA	NA	NA	NA	NA	NA	NA	NA	NA
					144	NA	NA	NA	NA	NA	NA	NA	NA	NA	NA	NA	NA	NA	NA	NA	NA	NA	NA	NA	NA	NA	NA	NA	NA	NA	NA	NA	NA	NA	NA	NA	NA	NA	NA	NA	NA	NA	NA	NA	NA	NA	NA	NA	NA
					145	NA	NA	NA	NA	NA	NA	NA	NA	NA	NA	NA	NA	NA	NA	NA	NA	NA	NA	NA	NA	NA	NA	NA	NA	NA	NA	NA	NA	NA	NA	NA	NA	NA	NA	NA	NA	NA	NA	NA	NA	NA	NA	NA	NA
					146	NA	NA	NA	NA	NA	NA	NA	NA	NA	NA	NA	NA	NA	NA	NA	NA	NA	NA	NA	NA	NA	NA	NA	NA	NA	NA	NA	NA	NA	NA	NA	NA	NA	NA	NA	NA	NA	NA	NA	NA	NA	NA	NA	NA
					147	NA	NA	NA	NA	NA	NA	NA	NA	NA	NA	NA	NA	NA	NA	NA	NA	NA	NA	NA	NA	NA	NA	NA	NA	NA	NA	NA	NA	NA	NA	NA	NA	NA	NA	NA	NA	NA	NA	NA	NA	NA	NA	NA	NA
					148	NA	NA	NA	NA	NA	NA	NA	NA	NA	NA	NA	NA	NA	NA	NA	NA	NA	NA	NA	NA	NA	NA	NA	NA	NA	NA	NA	NA	NA	NA	NA	NA	NA	NA	NA	NA	NA	NA	NA	NA	NA	NA	NA	NA
					149	NA	NA	NA	NA	NA	NA	NA	NA	NA	NA	NA	NA	NA	NA	NA	NA	NA	NA	NA	NA	NA	NA	NA	NA	NA	NA	NA	NA	NA	NA	NA	NA	NA	NA	NA	NA	NA	NA	NA	NA	NA	NA	NA	NA
					150	NA	NA	NA	NA	NA	NA	NA	NA	NA	NA	NA	NA	NA	NA	NA	NA	NA	NA	NA	NA	NA	NA	NA	NA	NA	NA	NA	NA	NA	NA	NA	NA	NA	NA	NA	NA	NA	NA	NA	NA	NA	NA	NA	NA
					151	NA	NA	NA	NA	NA	NA	NA	NA	NA	NA	NA	NA	NA	NA	NA	NA	NA	NA	NA	NA	NA	NA	NA	NA	NA	NA	NA	NA	NA	NA	NA	NA	NA	NA	NA	NA	NA	NA	NA	NA	NA	NA	NA	NA
					152	NA	NA	NA	NA	NA	NA	NA	NA	NA	NA	NA	NA	NA	NA	NA	NA	NA	NA	NA	NA	NA	NA	NA	NA	NA	NA	NA	NA	NA	NA	NA	NA	NA	NA	NA	NA	NA	NA	NA	NA	NA	NA	NA	NA
					153	NA	NA	NA	NA	NA	NA	NA	NA	NA	NA	NA	NA	NA	NA	NA	NA	NA	NA	NA	NA	NA	NA	NA	NA	NA	NA	NA	NA	NA	NA	NA	NA	NA	NA	NA	NA	NA	NA	NA	NA	NA	NA	NA	NA
					154	NA	NA	NA	NA	NA	NA	NA	NA	NA	NA	NA	NA	NA	NA	NA	NA	NA	NA	NA	NA	NA	NA	NA	NA	NA	NA	NA	NA	NA	NA	NA	NA	NA	NA	NA	NA	NA	NA	NA	NA	NA	NA	NA	NA
					155	NA	NA	NA	NA	NA	NA	NA	NA	NA	NA	NA	NA	NA	NA	NA	NA	NA	NA	NA	NA	NA	NA	NA	NA	NA	NA	NA	NA	NA	NA	NA	NA	NA	NA	NA	NA	NA	NA	NA	NA	NA	NA	NA	NA
					156	NA	NA	NA	NA	NA	NA	NA	NA	NA	NA	NA	NA	NA	NA	NA	NA	NA	NA	NA	NA	NA	NA	NA	NA	NA	NA	NA	NA	NA	NA	NA	NA	NA	NA	NA	NA	NA	NA	NA	NA	NA	NA	NA	NA
					157	NA	NA	NA	NA	NA	NA	NA	NA	NA	NA	NA	NA	NA	NA	NA	NA	NA	NA	NA	NA	NA	NA	NA	NA	NA	NA	NA	NA	NA	NA	NA	NA	NA	NA	NA	NA	NA	NA	NA	NA	NA	NA	NA	NA
					158	NA	NA	NA	NA	NA	NA	NA	NA	NA	NA	NA	NA	NA	NA	NA	NA	NA	NA	NA	NA	NA	NA	NA	NA	NA	NA	NA	NA	NA	NA	NA	NA	NA	NA	NA	NA	NA	NA	NA	NA	NA	NA	NA	NA
					159	NA	NA	NA	NA	NA	NA	NA	NA	NA	NA	NA	NA	NA	NA	NA	NA	NA	NA	NA	NA	NA	NA	NA	NA	NA	NA	NA	NA	NA	NA	NA	NA	NA	NA	NA	NA	NA	NA	NA	NA	NA	NA	NA	NA
					160	NA	NA	NA	NA	NA	NA	NA	NA	NA	NA	NA	NA	NA	NA	NA	NA	NA	NA	NA	NA	NA	NA	NA	NA	NA	NA	NA	NA	NA	NA	NA	NA	NA	NA	NA	NA	NA	NA	NA	NA	NA	NA	NA	NA
					161	NA	NA	NA	NA	NA	NA	NA	NA	NA	NA	NA	NA	NA	NA	NA	NA	NA	NA	NA	NA	NA	NA	NA	NA	NA	NA	NA	NA	NA	NA	NA	NA	NA	NA	NA	NA	NA	NA	NA	NA	NA	NA	NA	NA
					162	NA	NA	NA	NA	NA	NA	NA	NA	NA	NA	NA	NA	NA	NA	NA	NA	NA	NA	NA	NA	NA	NA	NA	NA	NA	NA	NA	NA	NA	NA	NA	NA	NA	NA	NA	NA	NA	NA	NA	NA	NA	NA	NA	NA
					163	NA	NA	NA	NA	NA	NA	NA	NA	NA	NA	NA	NA	NA	NA	NA	NA	NA	NA	NA	NA	NA	NA	NA	NA	NA	NA	NA	NA	NA	NA	NA	NA	NA	NA	NA	NA	NA	NA	NA	NA	NA	NA	NA	NA
					164	NA	NA	NA	NA	NA	NA	NA	NA	NA	NA	NA	NA	NA	NA	NA	NA	NA	NA	NA	NA	NA	NA	NA	NA	NA	NA	NA	NA	NA	NA	NA	NA	NA	NA	NA	NA	NA	NA	NA	NA	NA	NA	NA	NA
					165	NA	NA	NA	NA	NA	NA	NA	NA	NA	NA	NA	NA	NA	NA	NA	NA	NA	NA	NA	NA	NA	NA	NA	NA	NA	NA	NA	NA	NA	NA	NA	NA	NA	NA	NA	NA	NA	NA	NA	NA	NA	NA	NA	NA
					166	NA	NA	NA	NA	NA	NA	NA	NA	NA	NA	NA	NA	NA	NA	NA	NA	NA	NA	NA	NA	NA	NA	NA	NA	NA	NA	NA	NA	NA	NA	NA	NA	NA	NA	NA	NA	NA	NA	NA	NA	NA	NA	NA	NA
					167	NA	NA	NA	NA	NA	NA	NA	NA	NA	NA	NA	NA	NA	NA	NA	NA	NA	NA	NA	NA	NA	NA	NA	NA	NA	NA	NA	NA	NA	NA	NA	NA	NA	NA	NA	NA	NA	NA	NA	NA	NA	NA	NA	NA
					168	NA	NA	NA	NA	NA	NA	NA	NA	NA	NA	NA	NA	NA	NA	NA	NA	NA	NA	NA	NA	NA	NA	NA	NA	NA	NA	NA	NA	NA	NA	NA	NA	NA	NA	NA	NA	NA	NA	NA	NA	NA	NA	NA	NA
					169	NA	NA	NA	NA	NA	NA	NA	NA	NA	NA	NA	NA	NA	NA	NA	NA	NA	NA	NA	NA	NA	NA	NA	NA	NA	NA	NA	NA	NA	NA	NA	NA	NA	NA	NA	NA	NA	NA	NA	NA	NA	NA	NA	NA
					170	NA	NA	NA	NA	NA	NA	NA	NA	NA	NA	NA	NA	NA	NA	NA	NA	NA	NA	NA	NA	NA	NA	NA	NA	NA	NA	NA	NA	NA	NA	NA	NA	NA	NA	NA	NA	NA	NA	NA	NA	NA	NA	NA	NA
					171	NA	NA	NA	NA	NA	NA	NA	NA	NA	NA	NA	NA	NA	NA	NA	NA	NA	NA	NA	NA	NA	NA	NA	NA	NA	NA	NA	NA	NA	NA	NA	NA	NA	NA	NA	NA	NA	NA	NA	NA	NA	NA	NA	NA
					172	NA	NA	NA	NA	NA	NA	NA	NA	NA	NA	NA	NA	NA	NA	NA	NA	NA	NA	NA	NA	NA	NA	NA	NA	NA	NA	NA	NA	NA	NA	NA	NA	NA	NA	NA	NA	NA	NA	NA	NA	NA	NA	NA	NA
[truncated: 140 more columns]

[truncated: 11 more sheets: Kap104, Kap108, Kap109, Kap111, Kap120, Kap121, Kap122, Kap123, Los1, Yra1, Nab2]
