# Supplementary material for: DNA circles promote yeast ageing in part through stimulating the reorganization of nuclear pore complexes
Source: eLife. 2022 Apr 4;11:e71196. doi: 10.7554/eLife.71196 (PMC9020822; doi:10.7554/eLife.71196)
Supplement: Figure 6—source data 1. [file elife-71196-fig6-data1.xlsx]

## Sheet: FLIP_Kap60
YYB 15634
		Nuclear						At Plasmid						Control nuclei
1	0.277	166.378	122	215		1	0.277	192.324	113	255		1	0.277	137.757	66	205				1	1	1	1	1	1	1	1	1	1	1	1	1	1	1	1	1	1	1	1	1	1	1	1	1	1	1	1	1	1
2	0.277	147.054	93	210		2	0.277	178.297	127	254		2	0.277	127.838	71	183				0.778518	0.778153	0.706867	0.891844	0.873842	0.877149	0.865436	0.906132	0.793561	0.947551	1.03128	0.712948	0.807909	0.910735	0.861894	0.878885	0.819943	0.730795	0.901506	0.991412	1.03561	0.767234	0.871561	0.769408	0.951338	0.997368	0.8704	0.894169	0.915935	0.848469
3	0.277	154.243	103	212	1	3	0.277	183.162	120	242	1	3	0.277	131.108	76	211	1			0.827934	0.781385	0.770688	0.91322	0.904037	0.856931	0.800285	0.847371	0.800697	0.81032	0.886882	0.740258	0.905134	0.876782	0.882575	0.960444	0.806181	0.872953	0.981834	1.00481	0.978635	0.775313	0.835814	0.852606	1.03295	1.0687	0.987444	0.93825	0.842806	0.86096
4	0.277	120.081	74	178	0.778518	4	0.277	151.946	113	213	0.829572	4	0.277	120.865	69	171	0.921874			0.784651	0.856347	0.833842	0.832383	0.875954	0.878272	0.838464	0.890038	0.817582	0.948054	0.924667	0.772911	0.922954	0.862482	0.858038	0.950507	0.858988	0.824693	0.923673	1.13162	1.0245	0.751789	0.835442	0.871972	0.922993	0.975051	0.995957	0.916282	0.882267	0.955663
5	0.277	127.703	82	162	0.827934	5	0.277	165.865	107	236	0.905564	5	0.277	123.784	65	183	0.944138			0.727352	0.64365	0.656912	0.822291	0.810898	0.773811	0.721411	0.78203	0.717713	0.759131	0.845852	0.65166	0.763753	0.751373	0.791104	0.786811	0.800418	0.746222	0.787007	1.00825	0.957457	0.785264	0.718725	0.692131	0.928731	0.897737	1.03929	0.745136	0.868113	0.781738
6	0.277	121.027	64	174	0.784651	6	0.277	163.919	94	238	0.89494	6	0.277	117.486	73	163	0.896101			0.760469	0.771338	0.650748	0.764938	0.832769	0.790588	0.752644	0.727655	0.730088	0.816182	0.928253	0.675325	0.808433	0.78202	0.807937	0.892048	0.790449	0.742287	0.883341	1.15465	0.991169	0.913877	0.763219	0.821231	0.860538	0.801092	0.945734	0.764879	0.870472	0.844595
7	0.277	112.189	77	156	0.727352	7	0.277	159.216	107	225	0.869263	7	0.277	120.73	69	180	0.920844			0.753635	0.704803	0.676055	0.771109	0.870592	0.799082	0.781356	0.821284	0.781916	0.930792	0.875113	0.71028	0.808695	0.701239	0.804985	0.872954	0.836377	0.846691	0.844257	0.918563	1.00503	0.852421	0.727479	0.706471	0.891186	0.890355	0.874041	0.75746	0.814932	0.845029
8	0.277	117.297	79	172	0.760469	8	0.277	158.811	103	209	0.867052	8	0.277	116.351	74	167	0.887444			0.667427	0.593253	0.615759	0.712708	0.701241	0.738644	0.686074	0.748869	0.647693	0.825067	0.801793	0.624956	0.77227	0.711141	0.745116	0.803133	0.737359	0.625747	0.768538	0.709282	0.936565	0.746295	0.65339	0.623814	0.809572	0.771746	0.887815	0.684431	0.736226	0.70684
9	0.277	116.243	70	166	0.753635	9	0.277	157.243	118	212	0.858491	9	0.277	123	79	184	0.938158			0.685302	0.651719	0.661529	0.744772	0.710981	0.731345	0.758639	0.717663	0.698355	0.744719	0.820517	0.565605	0.744496	0.653305	0.757065	0.8274	0.750277	0.742615	0.902738	0.727836	0.92403	0.718005	0.649664	0.644252	0.836014	0.716573	0.953418	0.636633	0.789624	0.874303
10	0.277	102.946	49	171	0.667427	10	0.277	145.595	103	216	0.794897	10	0.277	119.189	76	167	0.90909			0.697043	0.701758	0.736791	0.740557	0.709573	0.747489	0.768579	0.758137	0.674917	0.732909	0.811214	0.618035	0.844995	0.74257	0.671764	0.841848	0.711657	0.626403	0.79685	0.713406	0.923084	0.714894	0.678144	0.694284	0.889655	0.777193	0.980966	0.670479	0.855459	0.854931
11	0.277	105.703	52	175	0.685302	11	0.277	134.892	72	182	0.736463	11	0.277	125.973	61	191	0.960834			0.615911	0.57263	0.528829	0.682824	0.71112	0.697368	0.628178	0.704128	0.640558	0.714728	0.821188	0.525791	0.73296	0.705796	0.658272	0.7581	0.670365	0.584374	0.664202	0.655676	0.949099	0.65012	0.547466	0.576476	0.839848	0.678087	0.913328	0.67241	0.735792	0.749892
12	0.277	107.514	68	153	0.697043	12	0.277	145.946	108	213	0.796814	12	0.277	122.297	71	186	0.932796			0.626077	0.607964	0.591991	0.667018	0.657499	0.71583	0.683705	0.642568	0.631385	0.713468	0.746748	0.579806	0.693524	0.68678	0.637078	0.817329	0.677526	0.624751	0.632496	0.585573	0.854236	0.558294	0.621369	0.585622	0.830262	0.622211	0.906033	0.609918	0.804637	0.708127
13	0.277	95	60	146	0.615911	13	0.277	131.216	75	181	0.716393	13	0.277	111	47	157	0.84663			0.650253	0.673961	0.596168	0.682222	0.68699	0.742858	0.689226	0.696448	0.677101	0.659764	0.791256	0.602987	0.743836	0.752002	0.61755	0.799009	0.700845	0.600457	0.726381	0.566668	0.863637	0.600272	0.594935	0.627217	0.825669	0.681781	0.968812	0.681312	0.73515	0.80111
14	0.277	96.568	62	133	0.626077	14	0.277	140.973	98	219	0.769663	14	0.277	113.649	60	172	0.866835			0.592254	0.549498	0.59353	0.661376	0.612194	0.645768	0.557663	0.633429	0.590331	0.714306	0.861326	0.494599	0.626965	0.600184	0.613179	0.744999	0.66039	0.635586	0.645124	0.58694	0.913872	0.366254	0.481944	0.469249	0.729117	0.614127	0.863507	0.570433	0.706625	0.757206
15	0.277	100.297	61	152	0.650253	15	0.277	138.459	81	195	0.755937	15	0.277	113.027	68	167	0.862091			0.535136	0.570121	0.59353	0.612898	0.635759	0.695122	0.603879	0.672555	0.608818	0.710456	0.808072	0.533077	0.729299	0.632408	0.596479	0.74216	0.630477	0.626075	0.645428	0.598285	0.918333	0.42927	0.510238	0.563385	0.738317	0.708311	0.884977	0.686059	0.77397	0.693497
16	0.277	91.351	49	134	0.592254	16	0.277	140.351	89	212	0.766267	16	0.277	121.054	77	157	0.923315			0.598212	0.588953	0.669671	0.657835	0.685157	0.688167	0.649156	0.591368	0.511863	0.69127	0.740025	0.571548	0.730085	0.638534	0.618835	0.769777	0.650982	0.603749	0.652502	0.606183	0.89127	0.440979	0.498695	0.547786	0.704593	0.722019	0.858246	0.659192	0.728073	0.64572
17	0.277	82.541	47	121	0.535136	17	0.277	123.595	78	175	0.674785	17	0.277	120.892	82	157	0.92208			0.559662	0.470588	0.504401	0.53282	0.598222	0.584412	0.529739	0.567841	0.540105	0.611512	0.716367	0.475181	0.642425	0.535121	0.545474	0.713702	0.616432	0.474722	0.601415	0.560487	0.863546	0.438905	0.517684	0.453287	0.775476	0.577406	0.961931	0.550841	0.652368	0.64744
18	0.277	92.27	60	158	0.598212	18	0.277	132.919	82	189	0.725691	18	0.277	104.838	56	160	0.799631			0.555286	0.517574	0.541816	0.538311	0.637315	0.585535	0.61508	0.599048	0.527589	0.54105	0.763677	0.523847	0.733485	0.582426	0.670602	0.748035	0.592695	0.534474	0.606648	0.564261	0.836198	0.388956	0.468727	0.514797	0.716855	0.632756	0.942495	0.628617	0.579031	0.65088
19	0.277	86.324	51	136	0.559662	19	0.277	140.405	86	189	0.766562	19	0.277	104.486	72	131	0.796946			0.539862	0.569942	0.558761	0.593479	0.580583	0.655385	0.657047	0.57576	0.550879	0.563838	0.718612	0.553832	0.72825	0.635236	0.614979	0.697447	0.639609	0.627059	0.67651	0.607223	0.833156	0.384499	0.450854	0.558723	0.688124	0.711474	0.859464	0.663348	0.653444	0.705554
20	0.277	85.649	53	140	0.555286	20	0.277	128	68	188	0.698835	20	0.277	119.73	69	175	0.913217			0.553704	0.488345	0.452028	0.570152	0.545158	0.556055	0.592684	0.492499	0.474595	0.481565	0.641592	0.527128	0.594997	0.624234	0.563202	0.631632	0.552529	0.479641	0.602023	0.536769	0.805717	0.421084	0.412697	0.410256	0.753255	0.591639	0.861887	0.558411	0.610982	0.67972
21	0.277	83.27	57	120	0.539862	21	0.277	127	82	191	0.693375	21	0.277	111.486	68	160	0.850337			0.557737	0.486367	0.488116	0.547945	0.559416	0.6351	0.702318	0.477992	0.498764	0.536026	0.6861	0.503098	0.615691	0.603019	0.561022	0.718931	0.603513	0.552524	0.643588	0.578013	0.788909	0.3418	0.389052	0.46979	0.605752	0.573186	0.916567	0.546685	0.662663	0.656041
22	0.277	85.405	48	132	0.553704	22	0.277	123.378	81	149	0.6736	22	0.277	105.703	53	146	0.806228			0.518312	0.495339	0.5603	0.541773	0.623343	0.638185	0.639852	0.516879	0.486241	0.518851	0.702018	0.596067	0.695233	0.542824	0.631032	0.64957	0.620083	0.502296	0.599254	0.540204	0.829361	0.322417	0.440619	0.479291	0.622221	0.632756	0.870802	0.579191	0.609264	0.683161
23	0.277	86.027	38	125	0.557737	23	0.277	125.892	85	171	0.687326	23	0.277	98.216	55	150	0.749123			0.513754	0.398851	0.458843	0.527171	0.543471	0.53731	0.52532	0.503473	0.481148	0.545154	0.581842	0.531009	0.673345	0.492062	0.573742	0.622207	0.58062	0.518391	0.600791	0.485909	0.797359	0.445436	0.391662	0.372783	0.706897	0.60868	0.926687	0.504376	0.546005	0.622892
24	0.277	79.946	41	119	0.518312	24	0.277	123.865	73	178	0.676259	24	0.277	104.622	41	159	0.797983			0.531979	0.436693	0.500216	0.512497	0.560259	0.556405	0.530842	0.476653	0.472123	0.479305	0.643945	0.531863	0.697321	0.552097	0.627442	0.605497	0.548453	0.552864	0.652502	0.587629	0.792613	0.369471	0.394823	0.462974	0.684676	0.704446	0.806805	0.484194	0.550072	0.730954
25	0.277	79.243	43	115	0.513754	25	0.277	122.676	72	177	0.669768	25	0.277	107.216	74	160	0.817769			0.569303	0.461444	0.530368	0.55841	0.558287	0.54089	0.554347	0.463972	0.437469	0.503179	0.589912	0.541328	0.63823	0.537009	0.620625	0.622078	0.56264	0.526262	0.591252	0.660829	0.857655	0.372784	0.368389	0.425315	0.661297	0.62836	0.864725	0.495178	0.558442	0.697806
26	0.277	82.054	39	128	0.531979	26	0.277	112.297	71	203	0.613102	26	0.277	112.054	60	175	0.854669			0.44472	0.386655	0.493181	0.499925	0.539944	0.452928	0.518853	0.398392	0.387973	0.467494	0.64832	0.457217	0.62277	0.435642	0.647094	0.562591	0.489748	0.42351	0.576175	0.488667	0.8173	0.575193	0.314411	0.383002	0.585821	0.589703	0.894293	0.441589	0.50912	0.677132
27	0.277	87.811	58	134	0.569303	27	0.277	118.135	72	177	0.644975	27	0.277	110.189	69	163	0.840445			0.467146	0.402441	0.470512	0.490965	0.493796	0.488028	0.488723	0.453493	0.410104	0.458193	0.66704	0.489622	0.623692	0.485935	0.533011	0.594399	0.525283	0.488837	0.625422	0.575256	0.795934	0.56296	0.357782	0.398601	0.634869	0.649621	0.85743	0.427047	0.53807	0.72536
28	0.277	68.595	31	98	0.44472	28	0.277	117.622	82	148	0.642175	28	0.277	113.622	55	163	0.866629			0.481688	0.381273	0.48415	0.475538	0.521593	0.52762	0.544722	0.505299	0.454213	0.463639	0.629487	0.514624	0.654874	0.555085	0.589795	0.59808	0.520788	0.519703	0.53309	0.559798	0.788716	0.452175	0.313102	0.47104	0.614179	0.632579	0.850549	0.499629	0.491314	0.597926
29	0.277	72.054	36	108	0.467146	29	0.277	110.27	63	147	0.602035	29	0.277	109.216	72	218	0.833023
30	0.277	74.297	29	112	0.481688	30	0.277	108.405	59	161	0.591853	30	0.277	105.135	55	139	0.801896
																				1	1	1	1	1	1	1	1	1	1	1	1	1	1	1	1	1	1	1	1	1	1	1	1	1	1	1	1	1	1
																				0.829572	0.845544	0.935211	0.761117	0.989493	0.948294	0.891247	0.803605	0.715234	0.876403	0.993518	0.700764	0.89212	0.866099	0.860656	0.982508	0.82137	1.0596	0.973483	0.829891	0.975725	0.688651	0.738402	0.991477	0.948899	0.956565	1.02527	0.711649	0.806101	0.791716
1	0.277	165.838	112	246		1	0.277	194.135	98	255		1	0.277	142	91	195				0.905564	0.775618	0.848426	0.819956	0.980952	0.950439	0.890177	0.871189	0.786801	0.995551	1.00242	0.753971	0.90323	0.86973	0.989494	0.968902	0.835822	1.03246	1.02834	0.837639	0.916845	0.658397	0.761407	0.957381	0.905157	1.03089	0.964908	0.683264	0.832025	0.803759
2	0.277	160.378	104	216		2	0.277	193	119	255		2	0.277	140.838	93	189				0.89494	0.795916	0.888131	0.831826	0.984271	0.924972	0.984245	0.872625	0.746803	0.979845	0.966334	0.807814	0.856102	0.874788	1.01503	0.980352	0.902008	0.997553	0.995618	0.81536	0.929543	0.668042	0.757152	0.950891	0.932135	0.97622	0.954678	0.681279	0.856672	0.831096
3	0.277	150.703	96	238	1	3	0.277	194.405	129	255	1	3	0.277	145.892	85	224	1			0.869263	0.662869	0.84655	0.688577	0.944206	0.86106	0.775312	0.725955	0.666219	0.950796	0.964691	0.55162	0.86103	0.782666	0.868609	0.927148	0.74796	0.965711	1.0462	0.749512	0.896305	0.471711	0.75483	0.928291	0.826666	0.993071	0.940059	0.609058	0.694361	0.774617
4	0.277	117.27	70	170	0.778153	4	0.277	164.378	87	255	0.845544	4	0.277	144.081	105	195	0.987587			0.867052	0.612541	0.781489	0.730709	0.941831	0.862875	0.922299	0.736471	0.662157	0.8869	0.938669	0.638978	0.8837	0.735954	0.874957	0.916118	0.823005	0.893448	1.03593	0.761781	0.917346	0.485013	0.72912	0.87723	0.840148	0.966858	0.803259	0.628054	0.72558	0.810498
5	0.277	117.757	80	164	0.781385	5	0.277	150.784	77	240	0.775618	5	0.277	130.162	75	191	0.892181			0.858491	0.634228	0.7827	0.77474	0.947053	0.853781	0.86372	0.754033	0.648622	0.919645	0.920002	0.673206	0.871515	0.762165	0.895893	0.907768	0.85924	0.966935	1.08009	0.792763	0.838792	0.477242	0.681939	0.872692	0.85569	0.982212	0.882203	0.57608	0.744933	0.855571
6	0.277	129.054	67	201	0.856347	6	0.277	154.73	75	237	0.795916	6	0.277	129.351	82	194	0.886622			0.794897	0.560963	0.819317	0.646024	0.897629	0.740045	0.694861	0.711195	0.643362	0.885556	0.916324	0.457829	0.824116	0.711953	0.754873	0.890326	0.712073	0.885692	1.02267	0.680118	0.864314	0.404929	0.646752	0.862685	0.713411	0.936904	0.740185	0.527448	0.672084	0.831219
7	0.277	97	54	136	0.64365	7	0.277	128.865	63	204	0.662869	7	0.277	130.622	77	191	0.895334			0.736463	0.582789	0.745809	0.667584	0.901766	0.810845	0.709846	0.684552	0.637799	0.885388	0.892626	0.497222	0.792487	0.768393	0.811555	0.881977	0.786412	0.85814	1.09346	0.760168	0.879499	0.421224	0.655254	0.842276	0.807032	0.863697	0.824353	0.535171	0.766294	0.849232
8	0.277	116.243	88	152	0.771338	8	0.277	119.081	69	212	0.612541	8	0.277	140.946	90	187	0.966098			0.796814	0.598081	0.696311	0.676853	0.912677	0.84339	0.711686	0.713086	0.672682	0.837193	0.939056	0.56814	0.869456	0.801352	0.7262	0.913071	0.812517	0.747298	1.10233	0.760816	0.809789	0.410077	0.730086	0.760714	0.782512	0.90788	0.743105	0.53705	0.758084	0.882262
9	0.277	106.216	51	142	0.704803	9	0.277	123.297	67	189	0.634228	9	0.277	122.135	77	176	0.83716			0.716393	0.537466	0.706104	0.588022	0.857222	0.797399	0.716887	0.63097	0.578411	0.80428	0.889145	0.418996	0.801093	0.669135	0.71139	0.923626	0.738172	0.737095	1.00353	0.669143	0.80294	0.368681	0.610591	0.816861	0.687655	0.821382	0.817251	0.460135	0.623882	0.834327
10	0.277	89.405	50	185	0.593253	10	0.277	109.054	45	210	0.560963	10	0.277	133.108	101	189	0.912374			0.769663	0.561518	0.619988	0.610846	0.882171	0.80422	0.629701	0.611596	0.562772	0.813179	0.92948	0.4703	0.736581	0.65408	0.760053	0.916273	0.728967	0.804456	1.00246	0.662043	0.791983	0.34826	0.614651	0.843057	0.810712	0.850028	0.771508	0.471615	0.619866	0.764513
11	0.277	98.216	58	168	0.651719	11	0.277	113.297	76	185	0.582789	11	0.277	123.459	79	172	0.846236			0.755937	0.558463	0.659157	0.602909	0.82285	0.772004	0.653254	0.583517	0.605025	0.81209	0.865447	0.493807	0.767041	0.725575	0.783687	0.860863	0.766024	0.823232	1.05154	0.734663	0.797338	0.371206	0.634571	0.809509	0.863858	0.781128	0.718042	0.472765	0.657664	0.733421
12	0.277	105.757	61	142	0.701758	12	0.277	116.27	59	243	0.598081	12	0.277	109.811	69	166	0.752687			0.766267	0.427916	0.69108	0.523493	0.829901	0.761737	0.644539	0.496405	0.512255	0.799744	0.841263	0.381909	0.733354	0.674062	0.67878	0.842374	0.622699	0.818534	0.990375	0.693024	0.76298	0.290465	0.535386	0.805598	0.63492	0.74986	0.886379	0.432479	0.624975	0.722537
13	0.277	86.297	54	120	0.57263	13	0.277	104.486	50	184	0.537466	13	0.277	125.73	77	182	0.861802			0.674785	0.486171	0.645742	0.537115	0.819256	0.72718	0.680786	0.519032	0.511051	0.798406	0.834104	0.391358	0.676552	0.667057	0.655141	0.837122	0.649968	0.81262	1.00556	0.606521	0.791609	0.33121	0.579659	0.796217	0.713823	0.799105	0.808057	0.472137	0.551218	0.633685
14	0.277	91.622	49	121	0.607964	14	0.277	109.162	72	176	0.561518	14	0.277	130.514	78	209	0.894593			0.725691	0.504936	0.602682	0.553333	0.803932	0.72608	0.644998	0.51775	0.536309	0.796894	0.807504	0.443216	0.725293	0.637341	0.635513	0.819894	0.665463	0.705245	1.03967	0.713679	0.793603	0.283254	0.577727	0.79997	0.719961	0.816515	0.734125	0.497286	0.539714	0.615026
15	0.277	101.568	65	155	0.673961	15	0.277	108.568	43	172	0.558463	15	0.277	128.784	74	193	0.882735			0.766562	0.405118	0.623746	0.521032	0.773831	0.751933	0.730497	0.477105	0.481731	0.77624	0.816599	0.370394	0.633722	0.673542	0.530022	0.788905	0.584595	0.650746	0.981073	0.588446	0.780906	0.30948	0.525909	0.896309	0.585453	0.675717	0.789469	0.413691	0.520907	0.569563
16	0.277	82.811	45	121	0.549498	16	0.277	83.189	33	133	0.427916	16	0.277	123.459	82	202	0.846236			0.698835	0.414156	0.584845	0.544345	0.776407	0.755441	0.626798	0.455157	0.456625	0.749619	0.837007	0.379527	0.707822	0.592319	0.613339	0.752979	0.560825	0.680548	0.998504	0.614269	0.78464	0.295053	0.575209	0.821318	0.681929	0.748364	0.778404	0.393449	0.548109	0.53679
17	0.277	85.919	37	136	0.570121	17	0.277	94.514	58	176	0.486171	17	0.277	118.892	76	186	0.814932			0.693375	0.451691	0.558148	0.547368	0.755255	0.782462	0.622055	0.493073	0.552848	0.75105	0.837973	0.389531	0.692051	0.576362	0.606332	0.812276	0.612329	0.64626	1.05464	0.660418	0.716051	0.291213	0.573277	0.874103	0.793948	0.755293	0.763784	0.441351	0.542815	0.566712
18	0.277	88.757	58	116	0.588953	18	0.277	98.162	48	158	0.504936	18	0.277	137	90	191	0.939051			0.6736	0.356179	0.585113	0.48508	0.754917	0.671776	0.591467	0.419433	0.463386	0.741311	0.79522	0.324493	0.651193	0.558196	0.55862	0.753714	0.587624	0.626253	1.02203	0.664622	0.661645	0.27782	0.55723	0.858305	0.590354	0.749301	0.82581	0.416927	0.482748	0.540678
19	0.277	70.919	30	123	0.470588	19	0.277	78.757	40	171	0.405118	19	0.277	143.243	88	201	0.981843			0.687326	0.439876	0.536821	0.473985	0.801152	0.743939	0.621597	0.413383	0.504733	0.692276	0.811279	0.337438	0.600838	0.522514	0.498651	0.723356	0.590306	0.645232	1.00717	0.662679	0.686547	0.280723	0.537318	0.836957	0.596079	0.737128	0.730363	0.384784	0.548294	0.532512
20	0.277	78	48	118	0.517574	20	0.277	80.514	38	120	0.414156	20	0.277	130.946	91	170	0.897554			0.676259	0.42305	0.536419	0.518223	0.761154	0.723806	0.602474	0.430183	0.465794	0.752475	0.798217	0.336166	0.648509	0.623331	0.452983	0.748622	0.633534	0.721785	1.04149	0.612974	0.740818	0.287934	0.601122	0.862136	0.673761	0.651937	0.746445	0.415154	0.532227	0.613867
21	0.277	85.892	53	119	0.569942	21	0.277	87.811	52	151	0.451691	21	0.277	117.892	61	157	0.808077			0.669768	0.341164	0.496044	0.448498	0.76163	0.690484	0.526001	0.362747	0.4055	0.690341	0.736022	0.288596	0.614816	0.580513	0.469907	0.680967	0.562459	0.646667	1.02428	0.595865	0.729988	0.228739	0.537318	0.838913	0.564597	0.653622	0.74833	0.335732	0.512874	0.572415
22	0.277	73.595	31	121	0.488345	22	0.277	69.243	20	131	0.356179	22	0.277	115.108	73	174	0.788995			0.613102	0.336576	0.524751	0.454323	0.723051	0.623645	0.516975	0.381369	0.399037	0.754572	0.756817	0.32862	0.715704	0.587906	0.483403	0.714372	0.542649	0.626661	1.03465	0.532924	0.695256	0.275666	0.527265	0.76994	0.534749	0.646511	0.761279	0.376747	0.481286	0.563993
23	0.277	73.297	36	120	0.486367	23	0.277	85.514	49	135	0.439876	23	0.277	126.486	69	207	0.866984			0.644975	0.372861	0.52086	0.429606	0.722441	0.646767	0.478124	0.356919	0.414524	0.700838	0.765815	0.312104	0.598062	0.519785	0.479462	0.701241	0.541949	0.648503	1.02331	0.556158	0.720159	0.309103	0.506379	0.783705	0.567055	0.695001	0.691729	0.367044	0.496807	0.567614
24	0.277	74.649	37	123	0.495339	24	0.277	82.243	38	144	0.42305	24	0.277	110.865	68	164	0.759911			0.642175	0.309745	0.505569	0.420618	0.718375	0.583693	0.464819	0.338075	0.358139	0.654074	0.698781	0.283355	0.627811	0.502532	0.482527	0.67703	0.48602	0.629312	0.963219	0.501613	0.690655	0.247657	0.448763	0.770331	0.516352	0.610376	0.755639	0.370589	0.464126	0.547284
25	0.277	60.108	30	84	0.398851	25	0.277	66.324	33	116	0.341164	25	0.277	116.622	75	153	0.799372			0.602035	0.351452	0.51885	0.423634	0.734985	0.550309	0.486387	0.352458	0.394829	0.646768	0.69172	0.279305	0.633722	0.487608	0.506821	0.678816	0.461433	0.591345	0.970063	0.623949	0.704346	0.239418	0.511405	0.749454	0.522489	0.564124	0.748537	0.339596	0.419395	0.542103
26	0.277	65.811	32	93	0.436693	26	0.277	65.432	25	128	0.336576	26	0.277	105.135	71	151	0.720636			0.591853	0.354235	0.583639	0.429044	0.698577	0.548751	0.515752	0.329524	0.38746	0.661796	0.704101	0.269775	0.649672	0.544962	0.480483	0.663214	0.501397	0.54828	0.978404	0.544217	0.689654	0.272387	0.49652	0.713561	0.567055	0.606251	0.712195	0.345648	0.417017	0.530707
27	0.277	69.541	33	99	0.461444	27	0.277	72.486	41	124	0.372861	27	0.277	111.595	68	191	0.764915
28	0.277	58.27	12	97	0.386655	28	0.277	60.216	25	90	0.309745	28	0.277	122.703	58	186	0.841054
29	0.277	60.649	28	105	0.402441	29	0.277	68.324	31	130	0.351452	29	0.277	128.378	81	176	0.879952			1	1	1	1	1	1	1	1	1	1	1	1	1	1	1	1	1	1	1	1	1	1	1	1	1	1	1	1	1	1
30	0.277	57.459	27	93	0.381273	30	0.277	68.865	36	118	0.354235	30	0.277	128.108	80	205	0.878102			0.921874	0.987587	0.9328	0.928292	1.06647	1.03643	0.974848	1.0651	1.01837	1.00142	0.960979	1.03446	0.987201	0.977088	0.857359	0.954018	1.02463	1.0818	0.921698	0.936711	1.1495	0.867048	0.966653	1.04771	0.856302	0.944055	0.957614	0.93323	1.0603	0.909056
																				0.944138	0.892181	0.993962	0.967123	1.00509	1.01861	0.927819	1.04535	1.01774	0.985605	0.880643	1.06642	0.959667	0.908159	0.897603	0.967661	1.05861	1.00556	0.954923	0.988017	1.10169	0.992673	0.888329	0.989354	0.899633	0.959803	0.913658	1.01734	0.982657	0.892978
																				0.896101	0.886622	0.899615	0.925315	0.887991	0.985535	0.982143	0.996201	1.01837	0.877549	0.9926	1.1029	0.960059	0.913458	0.91704	0.964739	1.00069	1.0416	1.02788	0.913115	0.993721	0.929581	0.964459	1.0095	0.938574	0.829457	0.984301	0.9889	0.908549	0.948032
1	0.277	121.595	73	190		1	0.277	205.973	115	255		1	0.277	104.243	63	155				0.920844	0.895334	1.00055	0.943755	0.908902	0.993826	0.907085	1.0117	0.962335	0.901875	1.01046	1.06107	0.945066	0.948868	0.910012	0.950308	0.997742	1.03235	0.995361	1.00862	1.03396	0.953061	1.00153	1.01575	0.916448	0.822518	0.978549	0.959419	0.854559	1.00816
2	0.277	124.486	89	191		2	0.277	202.054	130	255		2	0.277	99.622	56	142				0.887444	0.966098	1.05321	1.00756	0.956789	0.959253	0.938182	1.00014	0.917198	0.896399	0.919911	1.03748	0.913001	0.949818	0.869493	0.943682	0.973289	0.858599	0.921698	0.92697	1.06478	1.00569	0.994296	0.903201	0.863251	0.824873	0.965991	0.981965	0.985813	0.974016
3	0.277	122.811	74	169	1	3	0.277	201.486	136	255	1	3	0.277	98.541	61	159	1			0.938158	0.83716	0.991496	0.960068	0.986927	1.01006	0.859473	1.07738	0.973853	0.922656	0.930369	0.963693	0.939375	1.10339	0.919931	0.945102	0.97849	0.985227	0.922398	1.08315	1.0347	0.951406	1.01404	0.892784	0.86343	0.773272	0.984829	0.890217	1.0205	0.892542
4	0.277	86.811	41	143	0.706867	4	0.277	188.432	138	244	0.935211	4	0.277	91.919	41	151	0.9328			0.90909	0.912374	0.925391	0.913597	0.987342	0.942057	0.87598	0.966946	1.01898	0.87552	0.939807	1.00218	0.899176	0.995076	0.902015	0.908661	1.03225	1.03929	0.876391	0.889519	1.0574	0.941684	0.915751	0.939329	0.906402	0.886693	0.879121	0.943463	1.10208	0.930192
5	0.277	94.649	57	140	0.770688	5	0.277	170.946	113	226	0.848426	5	0.277	97.946	46	148	0.993962			0.960834	0.846236	0.919638	0.948513	0.973582	0.924505	0.881549	0.890576	0.892448	0.852509	0.876557	0.996485	0.961094	0.874074	0.901739	0.978072	1.02445	0.934856	0.926349	0.916107	1.04134	0.846509	0.980474	0.894398	0.900183	0.855078	1.03663	0.949708	1.05755	0.893868
6	0.277	102.405	63	160	0.833842	6	0.277	178.946	114	255	0.888131	6	0.277	88.649	53	129	0.899615			0.932796	0.752687	0.993688	0.940017	0.928855	0.966572	0.850068	1.00366	0.894626	0.82828	0.96557	0.967874	0.849923	0.939028	0.915385	0.895965	0.985432	0.990305	0.952144	0.897006	1.0203	0.918953	0.900391	0.860594	0.848816	0.861305	1.03244	0.914496	1.06584	0.938999
7	0.277	80.676	32	109	0.656912	7	0.277	170.568	100	246	0.84655	7	0.277	98.595	56	159	1.00055			0.84663	0.861802	0.918816	0.947242	0.997797	0.975925	0.813402	1.0572	0.975408	0.870449	0.952303	0.992141	0.88767	0.881839	0.895672	0.906452	0.991499	1.05223	0.92705	0.8824	0.991141	0.81955	0.905883	0.883054	0.897073	0.873293	0.896917	0.941898	1.09499	0.963676
8	0.277	79.919	49	123	0.650748	8	0.277	157.459	103	225	0.781489	8	0.277	103.784	61	150	1.05321			0.866835	0.894593	0.956384	0.949791	0.976886	1.00962	0.8086	1.02106	0.906926	0.809731	0.96378	0.968378	0.979833	0.92918	0.847298	0.975782	1.00329	0.960264	0.974447	0.883151	0.993721	0.900607	0.913779	0.863605	0.807123	0.848498	0.913658	0.981788	0.986992	0.931518
9	0.277	83.027	43	128	0.676055	9	0.277	157.703	92	225	0.7827	9	0.277	97.703	67	141	0.991496			0.862091	0.882735	0.936362	0.912408	0.917849	0.978125	0.800922	0.987712	0.872369	0.924173	0.87171	1.0537	0.897624	0.865551	0.800721	0.941	0.954038	0.970437	0.913808	0.911994	1.01772	0.880259	0.928256	0.89394	0.813892	0.840035	1.03035	0.978321	1.05283	0.914776
10	0.277	75.622	42	102	0.615759	10	0.277	165.081	78	221	0.819317	10	0.277	91.189	52	131	0.925391			0.923315	0.846236	0.851889	0.86576	0.837485	0.906157	0.83778	0.995904	0.908795	0.944653	0.944655	0.94429	0.887929	0.92274	0.753725	0.938318	0.987683	0.978285	0.93657	0.914987	1.09247	0.925732	0.953485	0.876334	0.859053	0.797482	0.912615	0.904262	0.96925	0.915874
11	0.277	81.243	53	115	0.661529	11	0.277	150.27	87	206	0.745809	11	0.277	90.622	42	142	0.919638			0.92208	0.814932	0.931978	0.867031	0.910003	0.933585	0.786524	0.94836	0.973696	0.955096	0.905635	0.911328	0.880945	0.91365	0.835316	0.887761	0.969472	0.926068	0.942841	0.808988	0.989845	0.942423	0.936374	0.91941	0.991592	0.813942	0.904766	0.894383	1.01103	0.904
12	0.277	90.486	44	133	0.736791	12	0.277	140.297	61	187	0.696311	12	0.277	97.919	60	144	0.993688			0.799631	0.939051	0.850245	0.901363	0.9473	0.965784	0.809368	1.00132	0.919999	0.969588	0.931902	0.893426	0.912483	0.923115	0.763786	0.912529	0.942769	0.962111	0.946562	0.925098	0.944994	0.925363	0.965114	0.886522	0.827598	0.778561	0.971743	0.915018	0.981876	0.945835
13	0.277	64.946	24	103	0.528829	13	0.277	142.27	84	222	0.706104	13	0.277	90.541	50	123	0.918816			0.796946	0.981843	0.829127	0.906542	0.907529	0.932879	0.762523	0.96372	0.881553	0.911199	0.851823	0.983941	0.858067	0.933346	0.744625	0.9593	0.939994	0.951493	0.872452	0.743076	0.938904	1.03246	0.857396	0.918953	0.809682	0.837094	0.970173	0.887793	1.00669	0.802905
14	0.277	72.703	46	108	0.591991	14	0.277	124.919	58	184	0.619988	14	0.277	94.243	43	154	0.956384			0.913217	0.897554	0.880141	0.930501	0.882068	0.90219	0.811477	0.945872	0.799532	0.823824	0.85488	0.940604	0.872025	0.95815	0.782529	0.878214	0.931319	0.976439	0.932161	0.744578	0.990952	0.946461	0.866822	0.892314	0.873668	0.838385	0.990053	0.899751	1.03862	0.875592
15	0.277	73.216	25	124	0.596168	15	0.277	132.811	58	186	0.659157	15	0.277	92.27	41	134	0.936362			0.850337	0.808077	0.893851	0.857434	0.925143	0.911011	0.786524	1.03672	0.849024	0.807094	0.78322	0.952985	0.92877	0.893012	0.888921	0.914106	0.941727	1.04437	0.834576	0.761426	1.0203	0.886669	0.874286	0.866615	0.892684	0.878935	1.12506	0.925773	0.998023	0.889682
16	0.277	72.892	41	105	0.59353	16	0.277	139.243	84	190	0.69108	16	0.277	83.946	45	137	0.851889			0.806228	0.788995	0.900437	0.857774	0.86198	0.861708	0.722213	0.976888	0.88171	0.8812	0.802602	0.908982	0.941052	0.941295	0.844959	0.924594	0.943636	0.929299	0.918218	0.778286	0.937243	0.92335	0.953052	0.917327	0.896702	0.837567	0.92098	0.914328	1.07293	0.892315
17	0.277	72.892	47	107	0.59353	17	0.277	130.108	86	176	0.645742	17	0.277	91.838	44	135	0.931978			0.749123	0.866984	0.981622	0.917329	0.872028	0.903601	0.808792	1.04535	0.812447	0.900357	0.793669	0.872683	0.829498	0.900202	0.829382	0.957564	0.989766	0.884485	0.853399	0.783519	0.945371	0.974696	0.913558	0.810569	0.837836	0.843089	0.979592	0.975022	1.05872	0.887258
18	0.277	82.243	43	117	0.669671	18	0.277	121.432	56	180	0.602682	18	0.277	83.784	31	123	0.850245			0.797983	0.759911	0.905369	0.905271	0.963398	0.944788	0.783257	0.996928	0.919068	0.870855	0.825803	0.961355	0.841129	0.87824	0.834346	0.899353	1.05411	0.916835	0.910087	0.799259	0.911041	0.941136	0.93747	0.816819	0.838386	0.819584	0.967033	0.881027	0.985813	0.858187
19	0.277	61.946	30	107	0.504401	19	0.277	125.676	54	230	0.623746	19	0.277	81.703	52	118	0.829127			0.817769	0.799372	0.884799	0.895497	0.936285	0.892397	0.719329	0.907554	0.809646	0.869743	0.792649	0.880371	0.874871	0.959474	0.819597	0.899587	0.867153	0.91174	0.908927	0.817609	0.935028	1.0244	0.853664	0.925203	0.768002	0.825458	0.967033	0.985777	0.982657	0.874929
20	0.277	66.541	29	101	0.541816	20	0.277	117.838	71	173	0.584845	20	0.277	86.73	43	124	0.880141			0.854669	0.720636	0.845577	0.898304	0.975505	0.872024	0.768667	0.993272	0.859611	0.841052	0.937007	0.897778	0.868663	0.831466	0.817258	0.881685	0.890914	0.930684	0.936111	0.738211	1.06847	0.945723	0.877575	0.850165	0.823951	0.784676	0.920465	0.901494	0.990929	0.918526
21	0.277	68.622	45	93	0.558761	21	0.277	112.459	43	198	0.558148	21	0.277	88.081	54	123	0.893851			0.840445	0.764915	0.870815	0.88437	0.90519	0.910746	0.740255	1.04433	0.877197	0.895084	0.870186	0.969717	0.909255	0.833174	0.828422	0.891623	0.92386	0.913125	0.938661	0.626966	0.9533	0.926102	0.901708	0.884438	0.848624	0.799485	0.892722	0.937219	0.964533	0.919852
22	0.277	55.514	22	100	0.452028	22	0.277	117.892	49	177	0.585113	22	0.277	88.73	62	119	0.900437			0.866629	0.841054	0.873007	0.88785	0.916061	0.889227	0.677094	0.962553	0.843264	0.734415	0.841108	0.867828	0.896589	0.882789	0.84124	0.857151	0.879988	0.870157	0.893354	0.735206	0.950532	0.823219	0.935277	0.913859	0.813342	0.808766	1.01466	0.914151	0.990548	0.951119
23	0.277	59.946	28	101	0.488116	23	0.277	108.162	50	157	0.536821	23	0.277	96.73	58	136	0.981622			0.833023	0.879952	0.908109	0.868309	0.90175	0.932796	0.660011	0.96372	0.895249	0.865686	0.851309	0.896601	0.932784	0.894145	0.849371	0.883262	0.90565	0.89695	0.93053	0.689885	1.00369	0.904825	0.880211	0.904357	0.826139	0.762574	1.03349	0.856049	0.934564	0.940551
24	0.277	68.811	36	114	0.5603	24	0.277	108.081	70	146	0.536419	24	0.277	89.216	53	122	0.905369			0.801896	0.878102	0.905643	0.855055	0.893905	0.854563	0.716069	0.975568	0.838128	0.818753	0.743686	0.874518	0.891933	0.820109	0.835725	0.912289	0.906349	0.901583	1.01069	0.722103	1.00166	0.895473	0.865947	0.799212	0.787748	0.760226	0.946625	0.898717	1.04138	0.820973
25	0.277	56.351	25	88	0.458843	25	0.277	99.946	53	136	0.496044	25	0.277	87.189	58	119	0.884799
26	0.277	61.432	34	104	0.500216	26	0.277	105.73	59	176	0.524751	26	0.277	83.324	46	144	0.845577
27	0.277	65.135	30	95	0.530368	27	0.277	104.946	55	143	0.52086	27	0.277	85.811	50	119	0.870815
28	0.277	60.568	32	98	0.493181	28	0.277	101.865	49	152	0.505569	28	0.277	86.027	51	157	0.873007
29	0.277	57.784	34	86	0.470512	29	0.277	104.541	57	155	0.51885	29	0.277	89.486	47	126	0.908109
30	0.277	59.459	28	101	0.48415	30	0.277	117.595	68	188	0.583639	30	0.277	89.243	50	135	0.905643
1	0.599	177.9	121	234		1	0.599	188.688	113	247		1	0.599	156.825	100	232
2	0.599	184.05	110	255		2	0.599	173.712	89	255		2	0.599	145.2	84	209
3	0.599	166.075	102	220	1	3	0.599	178.012	126	255	1	3	0.599	147.125	85	212	1
4	0.599	148.113	90	222	0.891844	4	0.599	135.488	77	234	0.761117	4	0.599	136.575	79	221	0.928292
5	0.599	151.663	89	235	0.91322	5	0.599	145.962	85	253	0.819956	5	0.599	142.288	87	207	0.967123
6	0.599	138.238	88	216	0.832383	6	0.599	148.075	70	226	0.831826	6	0.599	136.137	71	183	0.925315
7	0.599	136.562	82	209	0.822291	7	0.599	122.575	69	206	0.688577	7	0.599	138.85	94	191	0.943755
8	0.599	127.037	63	192	0.764938	8	0.599	130.075	64	243	0.730709	8	0.599	148.238	92	227	1.00756
9	0.599	128.062	87	181	0.771109	9	0.599	137.913	73	235	0.77474	9	0.599	141.25	92	208	0.960068
10	0.599	118.363	75	173	0.712708	10	0.599	115	61	224	0.646024	10	0.599	134.413	72	202	0.913597
11	0.599	123.688	80	180	0.744772	11	0.599	118.838	73	190	0.667584	11	0.599	139.55	89	224	0.948513
12	0.599	122.988	61	183	0.740557	12	0.599	120.488	53	228	0.676853	12	0.599	138.3	99	202	0.940017
13	0.599	113.4	73	188	0.682824	13	0.599	104.675	50	196	0.588022	13	0.599	139.363	85	208	0.947242
14	0.599	110.775	72	173	0.667018	14	0.599	108.738	71	172	0.610846	14	0.599	139.738	87	189	0.949791
15	0.599	113.3	50	184	0.682222	15	0.599	107.325	46	198	0.602909	15	0.599	134.238	83	207	0.912408
16	0.599	109.838	67	158	0.661376	16	0.599	93.188	52	164	0.523493	16	0.599	127.375	72	174	0.86576
17	0.599	101.787	51	141	0.612898	17	0.599	95.613	43	169	0.537115	17	0.599	127.562	75	199	0.867031
18	0.599	109.25	55	154	0.657835	18	0.599	98.5	46	191	0.553333	18	0.599	132.613	56	198	0.901363
19	0.599	88.488	47	133	0.53282	19	0.599	92.75	44	226	0.521032	19	0.599	133.375	88	192	0.906542
20	0.599	89.4	48	144	0.538311	20	0.599	96.9	50	174	0.544345	20	0.599	136.9	91	192	0.930501
21	0.599	98.562	51	165	0.593479	21	0.599	97.438	55	178	0.547368	21	0.599	126.15	83	180	0.857434
22	0.599	94.688	58	136	0.570152	22	0.599	86.35	45	161	0.48508	22	0.599	126.2	64	198	0.857774
23	0.599	91	47	139	0.547945	23	0.599	84.375	41	155	0.473985	23	0.599	134.962	84	197	0.917329
24	0.599	89.975	40	150	0.541773	24	0.599	92.25	45	187	0.518223	24	0.599	133.188	74	204	0.905271
25	0.599	87.55	48	144	0.527171	25	0.599	79.838	33	131	0.448498	25	0.599	131.75	84	202	0.895497
26	0.599	85.113	41	141	0.512497	26	0.599	80.875	24	165	0.454323	26	0.599	132.163	80	201	0.898304
27	0.599	92.738	51	137	0.55841	27	0.599	76.475	37	168	0.429606	27	0.599	130.113	74	178	0.88437
28	0.599	83.025	42	143	0.499925	28	0.599	74.875	22	146	0.420618	28	0.599	130.625	61	191	0.88785
29	0.599	81.537	42	142	0.490965	29	0.599	75.412	38	159	0.423634	29	0.599	127.75	87	192	0.868309
30	0.599	78.975	35	139	0.475538	30	0.599	76.375	34	127	0.429044	30	0.599	125.8	71	218	0.855055
1	0.434	137.845	84	200		1	0.434	255	255	255		1	0.434	149.845	92	207
2	0.434	129.5	76	213		2	0.434	254.638	234	255		2	0.434	131.207	52	198
3	0.434	122.172	74	211	1	3	0.434	254.31	241	255	1	3	0.434	125.293	89	189	1
4	0.434	106.759	54	145	0.873842	4	0.434	251.638	167	255	0.989493	4	0.434	133.621	81	197	1.06647
5	0.434	110.448	75	152	0.904037	5	0.434	249.466	190	255	0.980952	5	0.434	125.931	77	183	1.00509
6	0.434	107.017	50	172	0.875954	6	0.434	250.31	181	255	0.984271	6	0.434	111.259	61	192	0.887991
7	0.434	99.069	62	146	0.810898	7	0.434	240.121	163	255	0.944206	7	0.434	113.879	57	178	0.908902
8	0.434	101.741	64	151	0.832769	8	0.434	239.517	155	255	0.941831	8	0.434	119.879	73	159	0.956789
9	0.434	106.362	72	160	0.870592	9	0.434	240.845	161	255	0.947053	9	0.434	123.655	67	178	0.986927
10	0.434	85.672	51	123	0.701241	10	0.434	228.276	114	255	0.897629	10	0.434	123.707	81	172	0.987342
11	0.434	86.862	40	131	0.710981	11	0.434	229.328	128	255	0.901766	11	0.434	121.983	68	190	0.973582
12	0.434	86.69	41	135	0.709573	12	0.434	232.103	131	255	0.912677	12	0.434	116.379	78	181	0.928855
13	0.434	86.879	53	138	0.71112	13	0.434	218	70	255	0.857222	13	0.434	125.017	68	177	0.997797
14	0.434	80.328	46	112	0.657499	14	0.434	224.345	110	255	0.882171	14	0.434	122.397	73	173	0.976886
15	0.434	83.931	54	127	0.68699	15	0.434	209.259	103	255	0.82285	15	0.434	115	65	169	0.917849
16	0.434	74.793	34	114	0.612194	16	0.434	211.052	108	255	0.829901	16	0.434	104.931	47	174	0.837485
17	0.434	77.672	52	114	0.635759	17	0.434	208.345	67	255	0.819256	17	0.434	114.017	62	164	0.910003
18	0.434	83.707	49	140	0.685157	18	0.434	204.448	74	255	0.803932	18	0.434	118.69	58	183	0.9473
19	0.434	73.086	43	111	0.598222	19	0.434	196.793	96	255	0.773831	19	0.434	113.707	59	179	0.907529
20	0.434	77.862	30	103	0.637315	20	0.434	197.448	88	255	0.776407	20	0.434	110.517	39	185	0.882068
21	0.434	70.931	31	119	0.580583	21	0.434	192.069	75	255	0.755255	21	0.434	115.914	71	181	0.925143
22	0.434	66.603	27	119	0.545158	22	0.434	191.983	78	255	0.754917	22	0.434	108	63	161	0.86198
23	0.434	68.345	40	109	0.559416	23	0.434	203.741	78	255	0.801152	23	0.434	109.259	64	162	0.872028
24	0.434	76.155	46	123	0.623343	24	0.434	193.569	95	255	0.761154	24	0.434	120.707	77	190	0.963398
25	0.434	66.397	34	108	0.543471	25	0.434	193.69	70	255	0.76163	25	0.434	117.31	47	177	0.936285
26	0.434	68.448	31	131	0.560259	26	0.434	183.879	65	255	0.723051	26	0.434	122.224	64	192	0.975505
27	0.434	68.207	32	124	0.558287	27	0.434	183.724	67	255	0.722441	27	0.434	113.414	57	188	0.90519
28	0.434	65.966	33	102	0.539944	28	0.434	182.69	62	255	0.718375	28	0.434	114.776	76	167	0.916061
29	0.434	60.328	19	94	0.493796	29	0.434	186.914	76	255	0.734985	29	0.434	112.983	66	192	0.90175
30	0.434	63.724	33	110	0.521593	30	0.434	177.655	65	255	0.698577	30	0.434	112	64	167	0.893905
1	0.644	176	90	255		1	0.644	199.128	104	255		1	0.644	141.919	83	205
2	0.644	165.36	50	255		2	0.644	181.802	50	255		2	0.644	132.965	83	206
3	0.644	165.64	106	255	1	3	0.644	179.012	68	255	1	3	0.644	131.837	91	187	1
4	0.644	145.291	79	245	0.877149	4	0.644	169.756	59	255	0.948294	4	0.644	136.64	85	217	1.03643
5	0.644	141.942	76	251	0.856931	5	0.644	170.14	76	255	0.950439	5	0.644	134.291	82	225	1.01861
6	0.644	145.477	68	255	0.878272	6	0.644	165.581	76	255	0.924972	6	0.644	129.93	88	183	0.985535
7	0.644	128.174	54	211	0.773811	7	0.644	154.14	67	255	0.86106	7	0.644	131.023	67	187	0.993826
8	0.644	130.953	66	232	0.790588	8	0.644	154.465	68	255	0.862875	8	0.644	126.465	77	193	0.959253
9	0.644	132.36	65	210	0.799082	9	0.644	152.837	52	255	0.853781	9	0.644	133.163	78	211	1.01006
10	0.644	122.349	51	214	0.738644	10	0.644	132.477	51	248	0.740045	10	0.644	124.198	72	178	0.942057
11	0.644	121.14	54	208	0.731345	11	0.644	145.151	54	255	0.810845	11	0.644	121.884	76	205	0.924505
12	0.644	123.814	41	215	0.747489	12	0.644	150.977	41	255	0.84339	12	0.644	127.43	72	201	0.966572
13	0.644	115.512	62	186	0.697368	13	0.644	142.744	36	255	0.797399	13	0.644	128.663	72	204	0.975925
14	0.644	118.57	55	223	0.71583	14	0.644	143.965	62	255	0.80422	14	0.644	133.105	77	199	1.00962
15	0.644	123.047	62	232	0.742858	15	0.644	138.198	62	255	0.772004	15	0.644	128.953	76	195	0.978125
16	0.644	106.965	58	189	0.645768	16	0.644	136.36	47	250	0.761737	16	0.644	119.465	76	172	0.906157
17	0.644	115.14	61	202	0.695122	17	0.644	130.174	57	237	0.72718	17	0.644	123.081	66	167	0.933585
18	0.644	113.988	55	189	0.688167	18	0.644	129.977	55	239	0.72608	18	0.644	127.326	69	191	0.965784
19	0.644	96.802	35	175	0.584412	19	0.644	134.605	35	230	0.751933	19	0.644	122.988	72	192	0.932879
20	0.644	96.988	39	203	0.585535	20	0.644	135.233	47	254	0.755441	20	0.644	118.942	76	187	0.90219
21	0.644	108.558	43	187	0.655385	21	0.644	140.07	43	255	0.782462	21	0.644	120.105	57	171	0.911011
22	0.644	92.105	37	188	0.556055	22	0.644	120.256	37	245	0.671776	22	0.644	113.605	76	177	0.861708
23	0.644	105.198	42	209	0.6351	23	0.644	133.174	52	255	0.743939	23	0.644	119.128	80	196	0.903601
24	0.644	105.709	46	202	0.638185	24	0.644	129.57	58	255	0.723806	24	0.644	124.558	64	187	0.944788
25	0.644	89	45	154	0.53731	25	0.644	123.605	37	255	0.690484	25	0.644	117.651	70	169	0.892397
26	0.644	92.163	49	142	0.556405	26	0.644	111.64	29	234	0.623645	26	0.644	114.965	65	177	0.872024
27	0.644	89.593	49	150	0.54089	27	0.644	115.779	25	255	0.646767	27	0.644	120.07	72	171	0.910746
28	0.644	75.023	34	160	0.452928	28	0.644	104.488	37	244	0.583693	28	0.644	117.233	34	198	0.889227
29	0.644	80.837	39	150	0.488028	29	0.644	98.512	41	220	0.550309	29	0.644	122.977	84	186	0.932796
30	0.644	87.395	32	135	0.52762	30	0.644	98.233	29	202	0.548751	30	0.644	112.663	64	198	0.854563
1	0.277	180.162	109	232		1	0.277	178.973	106	253		1	0.277	140.541	95	199
2	0.277	176.405	130	247		2	0.277	177.297	111	251		2	0.277	153.378	91	221
3	0.277	171.324	116	223	1	3	0.277	176.703	88	245	1	3	0.277	140.784	82	217	1
4	0.277	148.27	101	207	0.865436	4	0.277	157.486	73	239	0.891247	4	0.277	137.243	86	196	0.974848
5	0.277	137.108	97	169	0.800285	5	0.277	157.297	77	226	0.890177	5	0.277	130.622	98	179	0.927819
6	0.277	143.649	83	181	0.838464	6	0.277	173.919	107	255	0.984245	6	0.277	138.27	89	215	0.982143
7	0.277	123.595	84	187	0.721411	7	0.277	137	65	200	0.775312	7	0.277	127.703	79	186	0.907085
8	0.277	128.946	62	178	0.752644	8	0.277	162.973	83	244	0.922299	8	0.277	132.081	68	204	0.938182
9	0.277	133.865	85	198	0.781356	9	0.277	152.622	91	218	0.86372	9	0.277	121	74	182	0.859473
10	0.277	117.541	80	162	0.686074	10	0.277	122.784	73	176	0.694861	10	0.277	123.324	67	173	0.87598
11	0.277	129.973	88	177	0.758639	11	0.277	125.432	69	181	0.709846	11	0.277	124.108	92	174	0.881549
12	0.277	131.676	73	187	0.768579	12	0.277	125.757	69	189	0.711686	12	0.277	119.676	64	176	0.850068
13	0.277	107.622	51	142	0.628178	13	0.277	126.676	62	213	0.716887	13	0.277	114.514	62	189	0.813402
14	0.277	117.135	71	167	0.683705	14	0.277	111.27	69	178	0.629701	14	0.277	113.838	55	178	0.8086
15	0.277	118.081	70	181	0.689226	15	0.277	115.432	60	201	0.653254	15	0.277	112.757	50	163	0.800922
16	0.277	95.541	53	141	0.557663	16	0.277	113.892	43	178	0.644539	16	0.277	117.946	62	175	0.83778
17	0.277	103.459	46	152	0.603879	17	0.277	120.297	46	198	0.680786	17	0.277	110.73	51	146	0.786524
18	0.277	111.216	68	152	0.649156	18	0.277	113.973	56	168	0.644998	18	0.277	113.946	62	201	0.809368
19	0.277	90.757	46	133	0.529739	19	0.277	129.081	71	191	0.730497	19	0.277	107.351	49	236	0.762523
20	0.277	105.378	53	205	0.61508	20	0.277	110.757	43	164	0.626798	20	0.277	114.243	55	255	0.811477
21	0.277	112.568	71	162	0.657047	21	0.277	109.919	61	184	0.622055	21	0.277	110.73	57	255	0.786524
22	0.277	101.541	59	133	0.592684	22	0.277	104.514	48	153	0.591467	22	0.277	101.676	55	223	0.722213
23	0.277	120.324	61	199	0.702318	23	0.277	109.838	59	176	0.621597	23	0.277	113.865	54	255	0.808792
24	0.277	109.622	59	189	0.639852	24	0.277	106.459	60	153	0.602474	24	0.277	110.27	53	212	0.783257
25	0.277	90	46	165	0.52532	25	0.277	92.946	51	145	0.526001	25	0.277	101.27	48	173	0.719329
26	0.277	90.946	57	129	0.530842	26	0.277	91.351	47	153	0.516975	26	0.277	108.216	57	180	0.768667
27	0.277	94.973	42	155	0.554347	27	0.277	84.486	41	150	0.478124	27	0.277	104.216	39	174	0.740255
28	0.277	88.892	48	135	0.518853	28	0.277	82.135	40	145	0.464819	28	0.277	95.324	52	163	0.677094
29	0.277	83.73	37	166	0.488723	29	0.277	85.946	51	124	0.486387	29	0.277	92.919	44	133	0.660011
30	0.277	93.324	54	193	0.544722	30	0.277	91.135	40	153	0.515752	30	0.277	100.811	46	182	0.716069
1	0.524	125.186	72	186		1	0.524	193.643	115	255		1	0.524	114.329	62	157
2	0.524	117.814	71	168		2	0.524	179.686	96	255		2	0.524	101.5	54	169
3	0.524	117.186	80	169	1	3	0.524	188.757	116	255	1	3	0.524	97.657	49	151	1
4	0.524	106.186	63	166	0.906132	4	0.524	151.686	95	214	0.803605	4	0.524	104.014	61	154	1.0651
5	0.524	99.3	52	149	0.847371	5	0.524	164.443	93	236	0.871189	5	0.524	102.086	43	177	1.04535
6	0.524	104.3	45	159	0.890038	6	0.524	164.714	107	255	0.872625	6	0.524	97.286	60	153	0.996201
7	0.524	91.643	48	140	0.78203	7	0.524	137.029	75	239	0.725955	7	0.524	98.8	58	141	1.0117
8	0.524	85.271	46	141	0.727655	8	0.524	139.014	55	248	0.736471	8	0.524	97.671	46	146	1.00014
9	0.524	96.243	63	143	0.821284	9	0.524	142.329	75	221	0.754033	9	0.524	105.214	54	155	1.07738
10	0.524	87.757	46	132	0.748869	10	0.524	134.243	71	243	0.711195	10	0.524	94.429	49	147	0.966946
11	0.524	84.1	40	124	0.717663	11	0.524	129.214	68	234	0.684552	11	0.524	86.971	56	130	0.890576
12	0.524	88.843	61	130	0.758137	12	0.524	134.6	74	235	0.713086	12	0.524	98.014	57	166	1.00366
13	0.524	82.514	48	130	0.704128	13	0.524	119.1	57	188	0.63097	13	0.524	103.243	52	149	1.0572
14	0.524	75.3	41	121	0.642568	14	0.524	115.443	67	182	0.611596	14	0.524	99.714	42	171	1.02106
15	0.524	81.614	43	139	0.696448	15	0.524	110.143	50	203	0.583517	15	0.524	96.457	64	151	0.987712
16	0.524	74.229	31	128	0.633429	16	0.524	93.7	46	156	0.496405	16	0.524	97.257	50	159	0.995904
17	0.524	78.814	37	132	0.672555	17	0.524	97.971	45	165	0.519032	17	0.524	92.614	50	141	0.94836
18	0.524	69.3	39	118	0.591368	18	0.524	97.729	40	179	0.51775	18	0.524	97.786	53	152	1.00132
19	0.524	66.543	29	115	0.567841	19	0.524	90.057	52	148	0.477105	19	0.524	94.114	41	161	0.96372
20	0.524	70.2	20	115	0.599048	20	0.524	85.914	36	127	0.455157	20	0.524	92.371	51	149	0.945872
21	0.524	67.471	33	116	0.57576	21	0.524	93.071	50	140	0.493073	21	0.524	101.243	53	162	1.03672
22	0.524	57.714	24	106	0.492499	22	0.524	79.171	34	134	0.419433	22	0.524	95.4	44	180	0.976888
23	0.524	56.014	13	110	0.477992	23	0.524	78.029	32	131	0.413383	23	0.524	102.086	52	174	1.04535
24	0.524	60.571	35	94	0.516879	24	0.524	81.2	44	139	0.430183	24	0.524	97.357	48	152	0.996928
25	0.524	59	21	96	0.503473	25	0.524	68.471	26	107	0.362747	25	0.524	88.629	36	179	0.907554
26	0.524	55.857	26	108	0.476653	26	0.524	71.986	33	115	0.381369	26	0.524	97	48	159	0.993272
27	0.524	54.371	26	90	0.463972	27	0.524	67.371	30	143	0.356919	27	0.524	101.986	51	156	1.04433
28	0.524	46.686	19	91	0.398392	28	0.524	63.814	31	103	0.338075	28	0.524	94	59	141	0.962553
29	0.524	53.143	27	93	0.453493	29	0.524	66.529	26	159	0.352458	29	0.524	94.114	33	165	0.96372
30	0.524	59.214	27	95	0.505299	30	0.524	62.2	26	109	0.329524	30	0.524	95.271	55	163	0.975568
1	0.329	159.091	110	221		1	0.329	155.773	87	221		1	0.329	156.409	88	220
2	0.329	153.045	113	214		2	0.329	156.409	108	208		2	0.329	148.295	104	182
3	0.329	156.114	107	225	1	3	0.329	151.159	105	196	1	3	0.329	146.023	98	223	1
4	0.329	123.886	75	170	0.793561	4	0.329	108.114	70	158	0.715234	4	0.329	148.705	86	198	1.01837
5	0.329	125	75	177	0.800697	5	0.329	118.932	84	170	0.786801	5	0.329	148.614	86	196	1.01774
6	0.329	127.636	74	174	0.817582	6	0.329	112.886	79	179	0.746803	6	0.329	148.705	77	198	1.01837
7	0.329	112.045	63	165	0.717713	7	0.329	100.705	59	158	0.666219	7	0.329	140.523	92	189	0.962335
8	0.329	113.977	78	160	0.730088	8	0.329	100.091	70	144	0.662157	8	0.329	133.932	95	202	0.917198
9	0.329	122.068	73	180	0.781916	9	0.329	98.045	52	146	0.648622	9	0.329	142.205	94	204	0.973853
10	0.329	101.114	58	143	0.647693	10	0.329	97.25	45	143	0.643362	10	0.329	148.795	77	207	1.01898
11	0.329	109.023	71	165	0.698355	11	0.329	96.409	54	144	0.637799	11	0.329	130.318	96	175	0.892448
12	0.329	105.364	69	139	0.674917	12	0.329	101.682	76	156	0.672682	12	0.329	130.636	88	185	0.894626
13	0.329	100	58	132	0.640558	13	0.329	87.432	39	138	0.578411	13	0.329	142.432	87	213	0.975408
14	0.329	98.568	47	149	0.631385	14	0.329	85.068	49	140	0.562772	14	0.329	132.432	91	176	0.906926
15	0.329	105.705	49	163	0.677101	15	0.329	91.455	54	135	0.605025	15	0.329	127.386	76	181	0.872369
16	0.329	92.159	59	129	0.590331	16	0.329	77.432	45	142	0.512255	16	0.329	132.705	76	192	0.908795
17	0.329	95.045	62	128	0.608818	17	0.329	77.25	44	120	0.511051	17	0.329	142.182	100	193	0.973696
18	0.329	79.909	51	120	0.511863	18	0.329	81.068	52	114	0.536309	18	0.329	134.341	99	217	0.919999
19	0.329	84.318	51	128	0.540105	19	0.329	72.818	44	107	0.481731	19	0.329	128.727	77	197	0.881553
20	0.329	82.364	46	128	0.527589	20	0.329	69.023	36	105	0.456625	20	0.329	116.75	53	171	0.799532
21	0.329	86	54	123	0.550879	21	0.329	83.568	54	127	0.552848	21	0.329	123.977	76	176	0.849024
22	0.329	74.091	37	117	0.474595	22	0.329	70.045	45	107	0.463386	22	0.329	128.75	81	188	0.88171
23	0.329	77.864	48	115	0.498764	23	0.329	76.295	21	118	0.504733	23	0.329	118.636	64	165	0.812447
24	0.329	75.909	39	118	0.486241	24	0.329	70.409	38	116	0.465794	24	0.329	134.205	62	190	0.919068
25	0.329	75.114	46	115	0.481148	25	0.329	61.295	35	96	0.4055	25	0.329	118.227	64	162	0.809646
26	0.329	73.705	39	96	0.472123	26	0.329	60.318	22	94	0.399037	26	0.329	125.523	75	177	0.859611
27	0.329	68.295	34	106	0.437469	27	0.329	62.659	33	122	0.414524	27	0.329	128.091	82	198	0.877197
28	0.329	60.568	31	92	0.387973	28	0.329	54.136	28	93	0.358139	28	0.329	123.136	86	160	0.843264
29	0.329	64.023	32	109	0.410104	29	0.329	59.682	30	100	0.394829	29	0.329	130.727	99	173	0.895249
30	0.329	70.909	44	113	0.454213	30	0.329	58.568	27	101	0.38746	30	0.329	122.386	66	171	0.838128
1	0.516	195.145	98	255		1	0.516	191.623	83	255		1	0.516	156.942	90	252
2	0.516	180.435	96	255		2	0.516	173.058	69	255		2	0.516	134.913	74	255
3	0.516	172.986	103	255	1	3	0.516	172.609	71	255	1	3	0.516	142.971	60	246	1
4	0.516	163.913	89	247	0.947551	4	0.516	151.275	46	255	0.876403	4	0.516	143.174	65	250	1.00142
5	0.516	140.174	75	227	0.81032	5	0.516	171.841	76	255	0.995551	5	0.516	140.913	67	247	0.985605
6	0.516	164	99	253	0.948054	6	0.516	169.13	52	255	0.979845	6	0.516	125.464	44	227	0.877549
7	0.516	131.319	68	221	0.759131	7	0.516	164.116	70	255	0.950796	7	0.516	128.942	64	255	0.901875
8	0.516	141.188	79	226	0.816182	8	0.516	153.087	50	255	0.8869	8	0.516	128.159	45	254	0.896399
9	0.516	161.014	74	255	0.930792	9	0.516	158.739	76	255	0.919645	9	0.516	131.913	68	255	0.922656
10	0.516	142.725	80	243	0.825067	10	0.516	152.855	64	255	0.885556	10	0.516	125.174	56	200	0.87552
11	0.516	128.826	75	225	0.744719	11	0.516	152.826	71	255	0.885388	11	0.516	121.884	56	240	0.852509
12	0.516	126.783	67	230	0.732909	12	0.516	144.507	39	255	0.837193	12	0.516	118.42	52	240	0.82828
13	0.516	123.638	62	194	0.714728	13	0.516	138.826	64	255	0.80428	13	0.516	124.449	67	232	0.870449
14	0.516	123.42	61	201	0.713468	14	0.516	140.362	54	255	0.813179	14	0.516	115.768	43	209	0.809731
15	0.516	114.13	64	204	0.659764	15	0.516	140.174	55	255	0.81209	15	0.516	132.13	50	255	0.924173
16	0.516	123.565	67	228	0.714306	16	0.516	138.043	52	254	0.799744	16	0.516	135.058	66	255	0.944653
17	0.516	122.899	68	206	0.710456	17	0.516	137.812	62	255	0.798406	17	0.516	136.551	59	230	0.955096
18	0.516	119.58	59	197	0.69127	18	0.516	137.551	52	255	0.796894	18	0.516	138.623	79	234	0.969588
19	0.516	105.783	43	198	0.611512	19	0.516	133.986	57	255	0.77624	19	0.516	130.275	67	217	0.911199
20	0.516	93.594	40	215	0.54105	20	0.516	129.391	48	254	0.749619	20	0.516	117.783	42	242	0.823824
21	0.516	97.536	27	184	0.563838	21	0.516	129.638	57	246	0.75105	21	0.516	115.391	60	218	0.807094
22	0.516	83.304	31	152	0.481565	22	0.516	127.957	45	248	0.741311	22	0.516	125.986	37	233	0.8812
23	0.516	92.725	36	179	0.536026	23	0.516	119.493	59	235	0.692276	23	0.516	128.725	66	241	0.900357
24	0.516	89.754	35	148	0.518851	24	0.516	129.884	58	235	0.752475	24	0.516	124.507	75	229	0.870855
25	0.516	94.304	33	162	0.545154	25	0.516	119.159	49	231	0.690341	25	0.516	124.348	50	255	0.869743
26	0.516	82.913	30	158	0.479305	26	0.516	130.246	45	255	0.754572	26	0.516	120.246	66	194	0.841052
27	0.516	87.043	31	152	0.503179	27	0.516	120.971	29	244	0.700838	27	0.516	127.971	56	207	0.895084
28	0.516	80.87	29	166	0.467494	28	0.516	112.899	45	252	0.654074	28	0.516	105	62	167	0.734415
29	0.516	79.261	26	150	0.458193	29	0.516	111.638	42	194	0.646768	29	0.516	123.768	64	221	0.865686
30	0.516	80.203	23	180	0.463639	30	0.516	114.232	45	255	0.661796	30	0.516	117.058	62	214	0.818753
1	0.329	213.841	142	255		1	0.329	246.432	202	255		1	0.269	130.306	92	209
2	0.329	203.159	143	255		2	0.329	239.591	188	255		2	0.269	120.056	87	175
3	0.329	202.727	135	255	1	3	0.329	234.955	147	255	1	3	0.269	108.917	55	169	1
4	0.329	209.068	120	255	1.03128	4	0.329	233.432	156	255	0.993518	4	0.269	104.667	59	174	0.960979
5	0.329	179.795	114	255	0.886882	5	0.329	235.523	179	255	1.00242	5	0.269	95.917	55	127	0.880643
6	0.329	187.455	117	255	0.924667	6	0.329	227.045	167	255	0.966334	6	0.269	108.111	66	167	0.9926
7	0.329	171.477	98	227	0.845852	7	0.329	226.659	136	255	0.964691	7	0.269	110.056	71	168	1.01046
8	0.329	188.182	100	255	0.928253	8	0.329	220.545	165	255	0.938669	8	0.269	100.194	60	131	0.919911
9	0.329	177.409	109	244	0.875113	9	0.329	216.159	123	255	0.920002	9	0.269	101.333	46	141	0.930369
10	0.329	162.545	99	229	0.801793	10	0.329	215.295	120	255	0.916324	10	0.269	102.361	58	162	0.939807
11	0.329	166.341	85	232	0.820517	11	0.329	209.727	138	255	0.892626	11	0.269	95.472	68	137	0.876557
12	0.329	164.455	75	233	0.811214	12	0.329	220.636	114	255	0.939056	12	0.269	105.167	54	157	0.96557
13	0.329	166.477	78	250	0.821188	13	0.329	208.909	150	255	0.889145	13	0.269	103.722	60	186	0.952303
14	0.329	151.386	93	220	0.746748	14	0.329	218.386	152	255	0.92948	14	0.269	104.972	67	151	0.96378
15	0.329	160.409	97	233	0.791256	15	0.329	203.341	103	255	0.865447	15	0.269	94.944	56	127	0.87171
16	0.329	174.614	107	253	0.861326	16	0.329	197.659	115	255	0.841263	16	0.269	102.889	49	153	0.944655
17	0.329	163.818	87	252	0.808072	17	0.329	195.977	123	255	0.834104	17	0.269	98.639	59	151	0.905635
18	0.329	150.023	97	225	0.740025	18	0.329	189.727	127	255	0.807504	18	0.269	101.5	65	153	0.931902
19	0.329	145.227	93	224	0.716367	19	0.329	191.864	124	255	0.816599	19	0.269	92.778	46	124	0.851823
20	0.329	154.818	83	255	0.763677	20	0.329	196.659	133	250	0.837007	20	0.269	93.111	50	147	0.85488
21	0.329	145.682	78	237	0.718612	21	0.329	196.886	114	255	0.837973	21	0.269	85.306	49	136	0.78322
22	0.329	130.068	78	233	0.641592	22	0.329	186.841	129	245	0.79522	22	0.269	87.417	48	135	0.802602
23	0.329	139.091	79	227	0.6861	23	0.329	190.614	130	255	0.811279	23	0.269	86.444	41	133	0.793669
24	0.329	142.318	76	221	0.702018	24	0.329	187.545	132	248	0.798217	24	0.269	89.944	52	141	0.825803
25	0.329	117.955	78	194	0.581842	25	0.329	172.932	103	233	0.736022	25	0.269	86.333	42	120	0.792649
26	0.329	130.545	78	220	0.643945	26	0.329	177.818	116	255	0.756817	26	0.269	102.056	50	142	0.937007
27	0.329	119.591	58	182	0.589912	27	0.329	179.932	109	255	0.765815	27	0.269	94.778	69	138	0.870186
28	0.329	131.432	65	218	0.64832	28	0.329	164.182	88	252	0.698781	28	0.269	91.611	63	138	0.841108
29	0.329	135.227	57	245	0.66704	29	0.329	162.523	81	255	0.69172	29	0.269	92.722	60	139	0.851309
30	0.329	127.614	81	188	0.629487	30	0.329	165.432	110	243	0.704101	30	0.269	81	51	116	0.743686
1	0.382	171.294	82	255		1	0.382	252.196	231	255		1	0.382	139.569	79	199
2	0.382	153.275	79	218		2	0.382	249.314	199	255		2	0.382	121.941	74	186
3	0.382	161.549	80	244	1	3	0.382	246.902	191	255	1	3	0.382	117.196	76	182	1
4	0.382	115.176	70	166	0.712948	4	0.382	173.02	92	244	0.700764	4	0.382	121.235	70	160	1.03446
5	0.382	119.588	66	190	0.740258	5	0.382	186.157	111	254	0.753971	5	0.382	124.98	62	173	1.06642
6	0.382	124.863	76	195	0.772911	6	0.382	199.451	135	255	0.807814	6	0.382	129.255	58	218	1.1029
7	0.382	105.275	64	185	0.65166	7	0.382	136.196	88	239	0.55162	7	0.382	124.353	92	181	1.06107
8	0.382	109.098	59	193	0.675325	8	0.382	157.765	104	252	0.638978	8	0.382	121.588	74	173	1.03748
9	0.382	114.745	42	166	0.71028	9	0.382	166.216	81	238	0.673206	9	0.382	112.941	78	168	0.963693
10	0.382	100.961	50	174	0.624956	10	0.382	113.039	68	183	0.457829	10	0.382	117.451	58	172	1.00218
11	0.382	91.373	43	167	0.565605	11	0.382	122.765	79	195	0.497222	11	0.382	116.784	57	168	0.996485
12	0.382	99.843	39	150	0.618035	12	0.382	140.275	77	204	0.56814	12	0.382	113.431	69	192	0.967874
13	0.382	84.941	44	139	0.525791	13	0.382	103.451	45	162	0.418996	13	0.382	116.275	64	174	0.992141
14	0.382	93.667	49	160	0.579806	14	0.382	116.118	65	175	0.4703	14	0.382	113.49	67	164	0.968378
15	0.382	97.412	50	157	0.602987	15	0.382	121.922	61	179	0.493807	15	0.382	123.49	58	197	1.0537
16	0.382	79.902	37	137	0.494599	16	0.382	94.294	34	158	0.381909	16	0.382	110.667	73	172	0.94429
17	0.382	86.118	48	164	0.533077	17	0.382	96.627	55	141	0.391358	17	0.382	106.804	61	138	0.911328
18	0.382	92.333	43	144	0.571548	18	0.382	109.431	63	173	0.443216	18	0.382	104.706	58	169	0.893426
19	0.382	76.765	36	128	0.475181	19	0.382	91.451	46	154	0.370394	19	0.382	115.314	60	179	0.983941
20	0.382	84.627	38	135	0.523847	20	0.382	93.706	51	141	0.379527	20	0.382	110.235	54	166	0.940604
21	0.382	89.471	30	166	0.553832	21	0.382	96.176	55	171	0.389531	21	0.382	111.686	45	177	0.952985
22	0.382	85.157	43	146	0.527128	22	0.382	80.118	42	139	0.324493	22	0.382	106.529	59	153	0.908982
23	0.382	81.275	39	141	0.503098	23	0.382	83.314	36	132	0.337438	23	0.382	102.275	68	157	0.872683
24	0.382	96.294	43	164	0.596067	24	0.382	83	49	118	0.336166	24	0.382	112.667	73	178	0.961355
25	0.382	85.784	38	146	0.531009	25	0.382	71.255	35	117	0.288596	25	0.382	103.176	59	149	0.880371
26	0.382	85.922	43	138	0.531863	26	0.382	81.137	37	139	0.32862	26	0.382	105.216	63	168	0.897778
27	0.382	87.451	38	147	0.541328	27	0.382	77.059	43	117	0.312104	27	0.382	113.647	64	170	0.969717
28	0.382	73.863	34	141	0.457217	28	0.382	69.961	32	112	0.283355	28	0.382	101.706	58	157	0.867828
29	0.382	79.098	35	164	0.489622	29	0.382	68.961	19	123	0.279305	29	0.382	105.078	41	170	0.896601
30	0.382	83.137	34	148	0.514624	30	0.382	66.608	30	122	0.269775	30	0.382	102.49	61	142	0.874518
1	0.516	124.217	63	196		1	0.516	164.275	67	255		1	0.516	116.797	57	159
2	0.516	113.029	49	176		2	0.516	170.435	70	255		2	0.516	114.899	61	190
3	0.516	110.609	39	179	1	3	0.516	161.754	79	255	1	3	0.516	112.116	70	171	1
4	0.516	89.362	29	176	0.807909	4	0.516	144.304	64	248	0.89212	4	0.516	110.681	55	190	0.987201
5	0.516	100.116	62	162	0.905134	5	0.516	146.101	54	255	0.90323	5	0.516	107.594	57	165	0.959667
6	0.516	102.087	53	176	0.922954	6	0.516	138.478	61	247	0.856102	6	0.516	107.638	54	174	0.960059
7	0.516	84.478	31	143	0.763753	7	0.516	139.275	64	215	0.86103	7	0.516	105.957	51	155	0.945066
8	0.516	89.42	41	139	0.808433	8	0.516	142.942	75	244	0.8837	8	0.516	102.362	31	159	0.913001
9	0.516	89.449	29	141	0.808695	9	0.516	140.971	69	229	0.871515	9	0.516	105.319	52	155	0.939375
10	0.516	85.42	29	136	0.77227	10	0.516	133.304	69	219	0.824116	10	0.516	100.812	60	147	0.899176
11	0.516	82.348	48	128	0.744496	11	0.516	128.188	63	222	0.792487	11	0.516	107.754	64	192	0.961094
12	0.516	93.464	53	172	0.844995	12	0.516	140.638	81	245	0.869456	12	0.516	95.29	43	154	0.849923
13	0.516	81.072	37	150	0.73296	13	0.516	129.58	61	241	0.801093	13	0.516	99.522	44	161	0.88767
14	0.516	76.71	39	121	0.693524	14	0.516	119.145	55	236	0.736581	14	0.516	109.855	66	167	0.979833
15	0.516	82.275	38	120	0.743836	15	0.516	124.072	41	214	0.767041	15	0.516	100.638	60	163	0.897624
16	0.516	69.348	25	111	0.626965	16	0.516	118.623	49	226	0.733354	16	0.516	99.551	46	171	0.887929
17	0.516	80.667	33	116	0.729299	17	0.516	109.435	37	201	0.676552	17	0.516	98.768	56	150	0.880945
18	0.516	80.754	29	132	0.730085	18	0.516	117.319	40	232	0.725293	18	0.516	102.304	55	153	0.912483
19	0.516	71.058	38	133	0.642425	19	0.516	102.507	45	226	0.633722	19	0.516	96.203	44	160	0.858067
20	0.516	81.13	42	175	0.733485	20	0.516	114.493	32	205	0.707822	20	0.516	97.768	57	150	0.872025
21	0.516	80.551	35	154	0.72825	21	0.516	111.942	44	225	0.692051	21	0.516	104.13	48	157	0.92877
22	0.516	65.812	35	139	0.594997	22	0.516	105.333	33	203	0.651193	22	0.516	105.507	47	155	0.941052
23	0.516	68.101	36	116	0.615691	23	0.516	97.188	27	198	0.600838	23	0.516	93	49	158	0.829498
24	0.516	76.899	34	129	0.695233	24	0.516	104.899	36	206	0.648509	24	0.516	94.304	44	149	0.841129
25	0.516	74.478	35	113	0.673345	25	0.516	99.449	24	180	0.614816	25	0.516	98.087	55	148	0.874871
26	0.516	77.13	33	138	0.697321	26	0.516	115.768	37	201	0.715704	26	0.516	97.391	46	161	0.868663
27	0.516	70.594	33	118	0.63823	27	0.516	96.739	46	171	0.598062	27	0.516	101.942	48	158	0.909255
28	0.516	68.884	26	112	0.62277	28	0.516	101.551	40	202	0.627811	28	0.516	100.522	60	162	0.896589
29	0.516	68.986	20	114	0.623692	29	0.516	102.507	45	187	0.633722	29	0.516	104.58	57	159	0.932784
30	0.516	72.435	39	114	0.654874	30	0.516	105.087	35	216	0.649672	30	0.516	100	52	161	0.891933
1	0.329	165.295	98	255		1	0.329	189.636	127	238		1	0.329	125.341	74	180
2	0.329	148.409	97	213		2	0.329	176.841	125	230		2	0.329	113.273	70	161
3	0.329	144.614	87	204	1	3	0.329	175.159	109	225	1	3	0.329	120.023	60	184	1
4	0.329	131.705	83	202	0.910735	4	0.329	151.705	81	220	0.866099	4	0.329	117.273	71	179	0.977088
5	0.329	126.795	67	187	0.876782	5	0.329	152.341	104	197	0.86973	5	0.329	109	58	195	0.908159
6	0.329	124.727	69	171	0.862482	6	0.329	153.227	104	242	0.874788	6	0.329	109.636	60	165	0.913458
7	0.329	108.659	56	155	0.751373	7	0.329	137.091	77	224	0.782666	7	0.329	113.886	66	157	0.948868
8	0.329	113.091	62	174	0.78202	8	0.329	128.909	85	191	0.735954	8	0.329	114	59	164	0.949818
9	0.329	101.409	52	156	0.701239	9	0.329	133.5	84	193	0.762165	9	0.329	132.432	95	179	1.10339
10	0.329	102.841	63	178	0.711141	10	0.329	124.705	63	178	0.711953	10	0.329	119.432	79	171	0.995076
11	0.329	94.477	53	148	0.653305	11	0.329	134.591	79	187	0.768393	11	0.329	104.909	62	151	0.874074
12	0.329	107.386	46	164	0.74257	12	0.329	140.364	96	206	0.801352	12	0.329	112.705	62	150	0.939028
13	0.329	102.068	51	145	0.705796	13	0.329	117.205	74	180	0.669135	13	0.329	105.841	50	171	0.881839
14	0.329	99.318	48	153	0.68678	14	0.329	114.568	64	169	0.65408	14	0.329	111.523	58	182	0.92918
15	0.329	108.75	72	150	0.752002	15	0.329	127.091	74	212	0.725575	15	0.329	103.886	67	166	0.865551
16	0.329	86.795	36	147	0.600184	16	0.329	118.068	76	175	0.674062	16	0.329	110.75	67	171	0.92274
17	0.329	91.455	57	141	0.632408	17	0.329	116.841	65	172	0.667057	17	0.329	109.659	73	162	0.91365
18	0.329	92.341	52	143	0.638534	18	0.329	111.636	66	163	0.637341	18	0.329	110.795	68	169	0.923115
19	0.329	77.386	39	125	0.535121	19	0.329	117.977	70	191	0.673542	19	0.329	112.023	50	162	0.933346
20	0.329	84.227	53	160	0.582426	20	0.329	103.75	61	168	0.592319	20	0.329	115	61	182	0.95815
21	0.329	91.864	25	192	0.635236	21	0.329	100.955	44	155	0.576362	21	0.329	107.182	53	159	0.893012
22	0.329	90.273	47	166	0.624234	22	0.329	97.773	53	156	0.558196	22	0.329	112.977	72	186	0.941295
23	0.329	87.205	41	158	0.603019	23	0.329	91.523	53	131	0.522514	23	0.329	108.045	58	162	0.900202
24	0.329	78.5	44	127	0.542824	24	0.329	109.182	66	172	0.623331	24	0.329	105.409	71	165	0.87824
25	0.329	71.159	27	128	0.492062	25	0.329	101.682	64	169	0.580513	25	0.329	115.159	64	158	0.959474
26	0.329	79.841	36	168	0.552097	26	0.329	102.977	31	138	0.587906	26	0.329	99.795	63	149	0.831466
27	0.329	77.659	26	140	0.537009	27	0.329	91.045	41	132	0.519785	27	0.329	100	56	160	0.833174
28	0.329	63	31	106	0.435642	28	0.329	88.023	44	150	0.502532	28	0.329	105.955	64	152	0.882789
29	0.329	70.273	38	124	0.485935	29	0.329	85.409	31	150	0.487608	29	0.329	107.318	60	166	0.894145
30	0.329	80.273	44	162	0.555085	30	0.329	95.455	40	182	0.544962	30	0.329	98.432	35	198	0.820109
1	0.516	127.551	77	210		1	0.516	219.058	152	255		1	0.516	103.899	49	192
2	0.516	115.71	67	202		2	0.516	202.464	138	255		2	0.516	94.855	52	172
3	0.516	112.812	66	176	1	3	0.516	198.652	109	255	1	3	0.516	105.159	52	167	1
4	0.516	97.232	52	180	0.861894	4	0.516	170.971	95	255	0.860656	4	0.516	90.159	56	139	0.857359
5	0.516	99.565	57	181	0.882575	5	0.516	196.565	127	255	0.989494	5	0.516	94.391	57	131	0.897603
6	0.516	96.797	53	168	0.858038	6	0.516	201.638	100	255	1.01503	6	0.516	96.435	55	139	0.91704
7	0.516	89.246	39	146	0.791104	7	0.516	172.551	90	255	0.868609	7	0.516	95.696	48	167	0.910012
8	0.516	91.145	27	164	0.807937	8	0.516	173.812	97	255	0.874957	8	0.516	91.435	47	133	0.869493
9	0.516	90.812	41	147	0.804985	9	0.516	177.971	106	255	0.895893	9	0.516	96.739	54	150	0.919931
10	0.516	84.058	38	130	0.745116	10	0.516	149.957	75	246	0.754873	10	0.516	94.855	39	147	0.902015
11	0.516	85.406	38	161	0.757065	11	0.516	161.217	92	241	0.811555	11	0.516	94.826	60	144	0.901739
12	0.516	75.783	32	129	0.671764	12	0.516	144.261	57	255	0.7262	12	0.516	96.261	55	156	0.915385
13	0.516	74.261	24	130	0.658272	13	0.516	141.319	63	251	0.71139	13	0.516	94.188	40	150	0.895672
14	0.516	71.87	32	132	0.637078	14	0.516	150.986	68	255	0.760053	14	0.516	89.101	50	142	0.847298
15	0.516	69.667	28	111	0.61755	15	0.516	155.681	76	233	0.783687	15	0.516	84.203	45	163	0.800721
16	0.516	69.174	27	125	0.613179	16	0.516	134.841	50	240	0.67878	16	0.516	79.261	45	133	0.753725
17	0.516	67.29	23	121	0.596479	17	0.516	130.145	54	246	0.655141	17	0.516	87.841	42	141	0.835316
18	0.516	69.812	31	138	0.618835	18	0.516	126.246	65	226	0.635513	18	0.516	80.319	39	126	0.763786
19	0.516	61.536	17	119	0.545474	19	0.516	105.29	35	195	0.530022	19	0.516	78.304	36	138	0.744625
20	0.516	75.652	37	189	0.670602	20	0.516	121.841	63	251	0.613339	20	0.516	82.29	47	130	0.782529
21	0.516	69.377	23	236	0.614979	21	0.516	120.449	56	220	0.606332	21	0.516	93.478	25	139	0.888921
22	0.516	63.536	30	134	0.563202	22	0.516	110.971	41	206	0.55862	22	0.516	88.855	45	141	0.844959
23	0.516	63.29	22	169	0.561022	23	0.516	99.058	49	207	0.498651	23	0.516	87.217	39	155	0.829382
24	0.516	71.188	37	165	0.631032	24	0.516	89.986	40	178	0.452983	24	0.516	87.739	34	142	0.834346
25	0.516	64.725	18	145	0.573742	25	0.516	93.348	41	196	0.469907	25	0.516	86.188	46	124	0.819597
26	0.516	70.783	37	172	0.627442	26	0.516	96.029	38	183	0.483403	26	0.516	85.942	47	129	0.817258
27	0.516	70.014	26	220	0.620625	27	0.516	95.246	31	186	0.479462	27	0.516	87.116	60	124	0.828422
28	0.516	73	29	162	0.647094	28	0.516	95.855	37	188	0.482527	28	0.516	88.464	47	150	0.84124
29	0.516	60.13	28	107	0.533011	29	0.516	100.681	36	206	0.506821	29	0.516	89.319	35	144	0.849371
30	0.516	66.536	33	130	0.589795	30	0.516	95.449	41	167	0.480483	30	0.516	87.884	53	139	0.835725
1	0.599	212.9	150	255		1	0.599	252.1	225	255		1	0.599	169.8	91	255
2	0.599	207.613	135	255		2	0.599	248.988	203	255		2	0.599	161.613	88	255
3	0.599	193.725	102	255	1	3	0.599	237.988	174	255	1	3	0.599	158.475	97	252	1
4	0.599	170.262	101	255	0.878885	4	0.599	233.825	122	255	0.982508	4	0.599	151.188	87	245	0.954018
5	0.599	186.062	103	240	0.960444	5	0.599	230.587	167	255	0.968902	5	0.599	153.35	76	253	0.967661
6	0.599	184.137	128	254	0.950507	6	0.599	233.312	171	255	0.980352	6	0.599	152.887	58	255	0.964739
7	0.599	152.425	76	235	0.786811	7	0.599	220.65	137	255	0.927148	7	0.599	150.6	96	253	0.950308
8	0.599	172.812	96	244	0.892048	8	0.599	218.025	131	255	0.916118	8	0.599	149.55	71	255	0.943682
9	0.599	169.113	94	228	0.872954	9	0.599	216.038	136	255	0.907768	9	0.599	149.775	98	255	0.945102
10	0.599	155.587	101	223	0.803133	10	0.599	211.887	127	255	0.890326	10	0.599	144	85	216	0.908661
11	0.599	160.288	82	251	0.8274	11	0.599	209.9	101	255	0.881977	11	0.599	155	93	255	0.978072
12	0.599	163.087	96	242	0.841848	12	0.599	217.3	141	255	0.913071	12	0.599	141.988	67	249	0.895965
13	0.599	146.863	92	220	0.7581	13	0.599	219.812	154	255	0.923626	13	0.599	143.65	77	237	0.906452
14	0.599	158.337	102	241	0.817329	14	0.599	218.062	158	255	0.916273	14	0.599	154.637	80	255	0.975782
15	0.599	154.788	103	237	0.799009	15	0.599	204.875	139	255	0.860863	15	0.599	149.125	79	235	0.941
16	0.599	144.325	95	210	0.744999	16	0.599	200.475	130	255	0.842374	16	0.599	148.7	72	255	0.938318
17	0.599	143.775	82	205	0.74216	17	0.599	199.225	136	255	0.837122	17	0.599	140.688	66	236	0.887761
18	0.599	149.125	81	219	0.769777	18	0.599	195.125	121	255	0.819894	18	0.599	144.613	79	244	0.912529
19	0.599	138.262	79	219	0.713702	19	0.599	187.75	117	249	0.788905	19	0.599	152.025	65	250	0.9593
20	0.599	144.913	91	220	0.748035	20	0.599	179.2	114	255	0.752979	20	0.599	139.175	66	255	0.878214
21	0.599	135.113	85	225	0.697447	21	0.599	193.312	107	255	0.812276	21	0.599	144.863	68	238	0.914106
22	0.599	122.363	70	191	0.631632	22	0.599	179.375	111	255	0.753714	22	0.599	146.525	79	254	0.924594
23	0.599	139.275	59	217	0.718931	23	0.599	172.15	102	255	0.723356	23	0.599	151.75	96	255	0.957564
24	0.599	125.838	64	199	0.64957	24	0.599	178.163	117	254	0.748622	24	0.599	142.525	86	255	0.899353
25	0.599	120.537	80	179	0.622207	25	0.599	162.062	76	227	0.680967	25	0.599	142.562	67	251	0.899587
26	0.599	117.3	59	172	0.605497	26	0.599	170.012	113	229	0.714372	26	0.599	139.725	54	224	0.881685
27	0.599	120.512	72	186	0.622078	27	0.599	166.887	83	255	0.701241	27	0.599	141.3	59	250	0.891623
28	0.599	108.988	65	153	0.562591	28	0.599	161.125	87	250	0.67703	28	0.599	135.837	55	214	0.857151
29	0.599	115.15	36	190	0.594399	29	0.599	161.55	97	255	0.678816	29	0.599	139.975	54	245	0.883262
30	0.599	115.863	66	176	0.59808	30	0.599	157.837	80	255	0.663214	30	0.599	144.575	80	243	0.912289
1	0.314	186.667	104	236		1	0.314	213.548	153	255		1	0.314	162.024	99	209
2	0.314	160.357	112	203		2	0.314	194.524	127	253		2	0.314	146.048	80	223
3	0.314	169.524	105	215	1	3	0.314	204.333	150	249	1	3	0.314	137.286	100	184	1
4	0.314	139	84	181	0.819943	4	0.314	167.833	112	233	0.82137	4	0.314	140.667	100	183	1.02463
5	0.314	136.667	84	183	0.806181	5	0.314	170.786	113	228	0.835822	5	0.314	145.333	95	222	1.05861
6	0.314	145.619	91	197	0.858988	6	0.314	184.31	120	254	0.902008	6	0.314	137.381	93	170	1.00069
7	0.314	135.69	89	188	0.800418	7	0.314	152.833	88	221	0.74796	7	0.314	136.976	89	212	0.997742
8	0.314	134	92	190	0.790449	8	0.314	168.167	122	215	0.823005	8	0.314	133.619	84	189	0.973289
9	0.314	141.786	104	188	0.836377	9	0.314	175.571	110	243	0.85924	9	0.314	134.333	81	184	0.97849
10	0.314	125	56	194	0.737359	10	0.314	145.5	92	217	0.712073	10	0.314	141.714	97	211	1.03225
11	0.314	127.19	87	171	0.750277	11	0.314	160.69	94	200	0.786412	11	0.314	140.643	98	204	1.02445
12	0.314	120.643	86	194	0.711657	12	0.314	166.024	127	223	0.812517	12	0.314	135.286	89	199	0.985432
13	0.314	113.643	61	172	0.670365	13	0.314	150.833	91	202	0.738172	13	0.314	136.119	78	183	0.991499
14	0.314	114.857	78	167	0.677526	14	0.314	148.952	99	232	0.728967	14	0.314	137.738	64	198	1.00329
15	0.314	118.81	70	171	0.700845	15	0.314	156.524	106	229	0.766024	15	0.314	130.976	92	186	0.954038
16	0.314	111.952	77	163	0.66039	16	0.314	127.238	83	181	0.622699	16	0.314	135.595	92	196	0.987683
17	0.314	106.881	60	168	0.630477	17	0.314	132.81	91	180	0.649968	17	0.314	133.095	77	191	0.969472
18	0.314	110.357	63	167	0.650982	18	0.314	135.976	87	213	0.665463	18	0.314	129.429	83	179	0.942769
19	0.314	104.5	74	196	0.616432	19	0.314	119.452	84	171	0.584595	19	0.314	129.048	64	174	0.939994
20	0.314	100.476	64	148	0.592695	20	0.314	114.595	64	151	0.560825	20	0.314	127.857	74	184	0.931319
21	0.314	108.429	61	150	0.639609	21	0.314	125.119	84	151	0.612329	21	0.314	129.286	62	188	0.941727
22	0.314	93.667	51	133	0.552529	22	0.314	120.071	85	167	0.587624	22	0.314	129.548	81	187	0.943636
23	0.314	102.31	61	154	0.603513	23	0.314	120.619	79	184	0.590306	23	0.314	135.881	68	194	0.989766
24	0.314	105.119	51	159	0.620083	24	0.314	129.452	89	189	0.633534	24	0.314	144.714	88	204	1.05411
25	0.314	98.429	56	138	0.58062	25	0.314	114.929	74	158	0.562459	25	0.314	119.048	82	160	0.867153
26	0.314	92.976	57	140	0.548453	26	0.314	110.881	57	156	0.542649	26	0.314	122.31	85	189	0.890914
27	0.314	95.381	55	148	0.56264	27	0.314	110.738	75	163	0.541949	27	0.314	126.833	65	217	0.92386
28	0.314	83.024	37	138	0.489748	28	0.314	99.31	51	153	0.48602	28	0.314	120.81	67	160	0.879988
29	0.314	89.048	60	127	0.525283	29	0.314	94.286	52	135	0.461433	29	0.314	124.333	78	183	0.90565
30	0.314	88.286	43	134	0.520788	30	0.314	102.452	56	159	0.501397	30	0.314	124.429	81	175	0.906349
1	0.277	86.676	42	142		1	0.277	158.73	96	212		1	0.277	76.054	38	129
2	0.277	77.108	53	103		2	0.277	139.514	68	217		2	0.277	69.216	33	138
3	0.277	82.324	40	118	1	3	0.277	132.405	73	200	1	3	0.277	58.486	39	83	1
4	0.277	60.162	31	95	0.730795	4	0.277	140.297	89	221	1.0596	4	0.277	63.27	25	96	1.0818
5	0.277	71.865	40	120	0.872953	5	0.277	136.703	64	199	1.03246	5	0.277	58.811	25	92	1.00556
6	0.277	67.892	36	122	0.824693	6	0.277	132.081	69	222	0.997553	6	0.277	60.919	37	103	1.0416
7	0.277	61.432	32	115	0.746222	7	0.277	127.865	63	208	0.965711	7	0.277	60.378	25	108	1.03235
8	0.277	61.108	27	95	0.742287	8	0.277	118.297	63	166	0.893448	8	0.277	50.216	23	95	0.858599
9	0.277	69.703	41	113	0.846691	9	0.277	128.027	84	180	0.966935	9	0.277	57.622	31	91	0.985227
10	0.277	51.514	22	85	0.625747	10	0.277	117.27	64	207	0.885692	10	0.277	60.784	37	96	1.03929
11	0.277	61.135	32	107	0.742615	11	0.277	113.622	56	186	0.85814	11	0.277	54.676	30	97	0.934856
12	0.277	51.568	18	79	0.626403	12	0.277	98.946	51	171	0.747298	12	0.277	57.919	33	97	0.990305
13	0.277	48.108	24	88	0.584374	13	0.277	97.595	46	161	0.737095	13	0.277	61.541	40	96	1.05223
14	0.277	51.432	16	76	0.624751	14	0.277	106.514	50	173	0.804456	14	0.277	56.162	36	86	0.960264
15	0.277	49.432	29	76	0.600457	15	0.277	109	54	153	0.823232	15	0.277	56.757	33	93	0.970437
16	0.277	52.324	20	84	0.635586	16	0.277	108.378	61	154	0.818534	16	0.277	57.216	15	96	0.978285
17	0.277	51.541	30	87	0.626075	17	0.277	107.595	46	147	0.81262	17	0.277	54.162	20	81	0.926068
18	0.277	49.703	19	74	0.603749	18	0.277	93.378	36	161	0.705245	18	0.277	56.27	27	125	0.962111
19	0.277	39.081	19	64	0.474722	19	0.277	86.162	40	118	0.650746	19	0.277	55.649	22	92	0.951493
20	0.277	44	19	85	0.534474	20	0.277	90.108	44	136	0.680548	20	0.277	57.108	27	92	0.976439
21	0.277	51.622	29	90	0.627059	21	0.277	85.568	42	138	0.64626	21	0.277	61.081	23	98	1.04437
22	0.277	39.486	12	70	0.479641	22	0.277	82.919	52	128	0.626253	22	0.277	54.351	16	84	0.929299
23	0.277	45.486	18	72	0.552524	23	0.277	85.432	47	129	0.645232	23	0.277	51.73	29	88	0.884485
24	0.277	41.351	13	66	0.502296	24	0.277	95.568	62	136	0.721785	24	0.277	53.622	27	103	0.916835
25	0.277	42.676	21	66	0.518391	25	0.277	85.622	31	166	0.646667	25	0.277	53.324	24	80	0.91174
26	0.277	45.514	14	76	0.552864	26	0.277	82.973	35	122	0.626661	26	0.277	54.432	22	92	0.930684
27	0.277	43.324	23	84	0.526262	27	0.277	85.865	44	159	0.648503	27	0.277	53.405	27	103	0.913125
28	0.277	34.865	15	75	0.42351	28	0.277	83.324	51	144	0.629312	28	0.277	50.892	31	84	0.870157
29	0.277	40.243	14	68	0.488837	29	0.277	78.297	48	133	0.591345	29	0.277	52.459	31	109	0.89695
30	0.277	42.784	22	78	0.519703	30	0.277	72.595	43	134	0.54828	30	0.277	52.73	30	91	0.901583
1	0.389	70.558	34	119		1	0.389	220.365	144	255		1	0.389	95.25	55	161
2	0.389	66.962	32	143		2	0.389	188.788	72	255		2	0.389	87.058	51	123
3	0.389	62.481	24	96	1	3	0.389	179.846	47	255	1	3	0.389	82.769	30	139	1
4	0.389	56.327	20	101	0.901506	4	0.389	175.077	53	255	0.973483	4	0.389	76.288	35	103	0.921698
5	0.389	61.346	25	124	0.981834	5	0.389	184.942	60	255	1.02834	5	0.389	79.038	40	119	0.954923
6	0.389	57.712	25	111	0.923673	6	0.389	179.058	54	255	0.995618	6	0.389	85.077	49	138	1.02788
7	0.389	49.173	16	108	0.787007	7	0.389	188.154	66	255	1.0462	7	0.389	82.385	45	130	0.995361
8	0.389	55.192	23	104	0.883341	8	0.389	186.308	70	255	1.03593	8	0.389	76.288	31	154	0.921698
9	0.389	52.75	12	101	0.844257	9	0.389	194.25	84	255	1.08009	9	0.389	76.346	31	116	0.922398
10	0.389	48.019	5	106	0.768538	10	0.389	183.923	52	255	1.02267	10	0.389	72.538	40	130	0.876391
11	0.389	56.404	21	132	0.902738	11	0.389	196.654	99	255	1.09346	11	0.389	76.673	44	123	0.926349
12	0.389	49.788	23	92	0.79685	12	0.389	198.25	68	255	1.10233	12	0.389	78.808	34	126	0.952144
13	0.389	41.5	16	70	0.664202	13	0.389	180.481	60	255	1.00353	13	0.389	76.731	35	148	0.92705
14	0.389	39.519	8	66	0.632496	14	0.389	180.288	40	255	1.00246	14	0.389	80.654	36	123	0.974447
15	0.389	45.385	13	91	0.726381	15	0.389	189.115	69	255	1.05154	15	0.389	75.635	48	118	0.913808
16	0.389	40.308	11	80	0.645124	16	0.389	178.115	62	255	0.990375	16	0.389	77.519	42	128	0.93657
17	0.389	40.327	23	66	0.645428	17	0.389	180.846	74	255	1.00556	17	0.389	78.038	37	114	0.942841
18	0.389	40.769	11	68	0.652502	18	0.389	186.981	67	255	1.03967	18	0.389	78.346	50	114	0.946562
19	0.389	37.577	17	74	0.601415	19	0.389	176.442	52	255	0.981073	19	0.389	72.212	26	98	0.872452
20	0.389	37.904	21	61	0.606648	20	0.389	179.577	55	255	0.998504	20	0.389	77.154	29	135	0.932161
21	0.389	42.269	15	84	0.67651	21	0.389	189.673	71	255	1.05464	21	0.389	69.077	34	103	0.834576
22	0.389	37.615	13	64	0.602023	22	0.389	183.808	69	255	1.02203	22	0.389	76	32	116	0.918218
23	0.389	40.212	16	86	0.643588	23	0.389	181.135	66	255	1.00717	23	0.389	70.635	33	113	0.853399
24	0.389	37.442	10	74	0.599254	24	0.389	187.308	55	255	1.04149	24	0.389	75.327	38	120	0.910087
25	0.389	37.538	10	75	0.600791	25	0.389	184.212	75	255	1.02428	25	0.389	75.231	38	110	0.908927
26	0.389	40.769	17	81	0.652502	26	0.389	186.077	81	255	1.03465	26	0.389	77.481	53	117	0.936111
27	0.389	36.942	14	66	0.591252	27	0.389	184.038	61	255	1.02331	27	0.389	77.692	41	111	0.938661
28	0.389	36	3	64	0.576175	28	0.389	173.231	55	255	0.963219	28	0.389	73.942	44	136	0.893354
29	0.389	39.077	15	69	0.625422	29	0.389	174.462	58	255	0.970063	29	0.389	77.019	28	131	0.93053
30	0.389	33.308	15	61	0.53309	30	0.389	175.962	51	255	0.978404	30	0.389	83.654	42	150	1.01069
1	0.254	98.882	62	149		1	0.254	104.824	70	166		1	0.254	82.735	55	115
2	0.254	94.676	63	131		2	0.254	87.441	49	148		2	0.254	79.559	51	115
3	0.254	85.588	51	138	1	3	0.254	91.118	52	128	1	3	0.254	78.529	46	114	1
4	0.254	84.853	43	136	0.991412	4	0.254	75.618	45	124	0.829891	4	0.254	73.559	47	120	0.936711
5	0.254	86	37	152	1.00481	5	0.254	76.324	42	138	0.837639	5	0.254	77.588	40	122	0.988017
6	0.254	96.853	27	255	1.13162	6	0.254	74.294	38	116	0.81536	6	0.254	71.706	27	101	0.913115
7	0.254	86.294	32	175	1.00825	7	0.254	68.294	38	122	0.749512	7	0.254	79.206	46	153	1.00862
8	0.254	98.824	26	226	1.15465	8	0.254	69.412	43	103	0.761781	8	0.254	72.794	42	114	0.92697
9	0.254	78.618	32	136	0.918563	9	0.254	72.235	38	128	0.792763	9	0.254	85.059	59	149	1.08315
10	0.254	60.706	30	97	0.709282	10	0.254	61.971	28	100	0.680118	10	0.254	69.853	25	124	0.889519
11	0.254	62.294	34	91	0.727836	11	0.254	69.265	39	109	0.760168	11	0.254	71.941	36	125	0.916107
12	0.254	61.059	30	107	0.713406	12	0.254	69.324	33	106	0.760816	12	0.254	70.441	37	131	0.897006
13	0.254	56.118	36	91	0.655676	13	0.254	60.971	32	99	0.669143	13	0.254	69.294	33	96	0.8824
14	0.254	50.118	24	77	0.585573	14	0.254	60.324	27	101	0.662043	14	0.254	69.353	30	108	0.883151
15	0.254	48.5	24	89	0.566668	15	0.254	66.941	36	99	0.734663	15	0.254	71.618	30	114	0.911994
16	0.254	50.235	17	79	0.58694	16	0.254	63.147	26	118	0.693024	16	0.254	71.853	43	121	0.914987
17	0.254	51.206	17	104	0.598285	17	0.254	55.265	23	86	0.606521	17	0.254	63.529	37	103	0.808988
18	0.254	51.882	25	87	0.606183	18	0.254	65.029	34	109	0.713679	18	0.254	72.647	35	114	0.925098
19	0.254	47.971	22	73	0.560487	19	0.254	53.618	19	83	0.588446	19	0.254	58.353	34	91	0.743076
20	0.254	48.294	19	68	0.564261	20	0.254	55.971	21	95	0.614269	20	0.254	58.471	21	84	0.744578
21	0.254	51.971	16	82	0.607223	21	0.254	60.176	24	99	0.660418	21	0.254	59.794	33	99	0.761426
22	0.254	45.941	21	67	0.536769	22	0.254	60.559	26	91	0.664622	22	0.254	61.118	37	102	0.778286
23	0.254	49.471	23	80	0.578013	23	0.254	60.382	17	88	0.662679	23	0.254	61.529	33	98	0.783519
24	0.254	46.235	21	73	0.540204	24	0.254	55.853	30	96	0.612974	24	0.254	62.765	33	94	0.799259
25	0.254	41.588	16	74	0.485909	25	0.254	54.294	21	92	0.595865	25	0.254	64.206	32	100	0.817609
26	0.254	50.294	9	84	0.587629	26	0.254	48.559	16	83	0.532924	26	0.254	57.971	18	93	0.738211
27	0.254	56.559	27	83	0.660829	27	0.254	50.676	22	83	0.556158	27	0.254	49.235	25	83	0.626966
28	0.254	41.824	18	70	0.488667	28	0.254	45.706	20	84	0.501613	28	0.254	57.735	24	89	0.735206
29	0.254	49.235	26	79	0.575256	29	0.254	56.853	19	104	0.623949	29	0.254	54.176	33	78	0.689885
30	0.254	47.912	18	85	0.559798	30	0.254	49.588	15	73	0.544217	30	0.254	56.706	29	90	0.722103
1	0.449	201.083	126	255		1	0.449	152	84	255		1	0.449	109.367	60	161
2	0.449	192.667	95	255		2	0.449	136.067	71	255		2	0.449	106	67	168
3	0.449	175.517	102	255	1	3	0.449	133.883	75	255	1	3	0.449	90.3	47	161	1
4	0.449	181.767	115	255	1.03561	4	0.449	130.633	68	255	0.975725	4	0.449	103.8	60	171	1.1495
5	0.449	171.767	75	255	0.978635	5	0.449	122.75	55	254	0.916845	5	0.449	99.483	55	180	1.10169
6	0.449	179.817	78	255	1.0245	6	0.449	124.45	50	255	0.929543	6	0.449	89.733	38	159	0.993721
7	0.449	168.05	111	255	0.957457	7	0.449	120	60	248	0.896305	7	0.449	93.367	52	156	1.03396
8	0.449	173.967	81	255	0.991169	8	0.449	122.817	58	255	0.917346	8	0.449	96.15	35	140	1.06478
9	0.449	176.4	90	255	1.00503	9	0.449	112.3	37	227	0.838792	9	0.449	93.433	55	148	1.0347
10	0.449	164.383	92	255	0.936565	10	0.449	115.717	43	232	0.864314	10	0.449	95.483	41	138	1.0574
11	0.449	162.183	75	255	0.92403	11	0.449	117.75	51	232	0.879499	11	0.449	94.033	41	158	1.04134
12	0.449	162.017	85	246	0.923084	12	0.449	108.417	45	235	0.809789	12	0.449	92.133	55	134	1.0203
13	0.449	166.583	80	255	0.949099	13	0.449	107.5	46	205	0.80294	13	0.449	89.5	49	136	0.991141
14	0.449	149.933	85	245	0.854236	14	0.449	106.033	48	194	0.791983	14	0.449	89.733	44	137	0.993721
15	0.449	151.583	74	236	0.863637	15	0.449	106.75	45	211	0.797338	15	0.449	91.9	49	135	1.01772
16	0.449	160.4	82	255	0.913872	16	0.449	102.15	46	249	0.76298	16	0.449	98.65	52	155	1.09247
17	0.449	161.183	79	255	0.918333	17	0.449	105.983	46	209	0.791609	17	0.449	89.383	37	131	0.989845
18	0.449	156.433	73	244	0.89127	18	0.449	106.25	50	190	0.793603	18	0.449	85.333	43	163	0.944994
19	0.449	151.567	71	255	0.863546	19	0.449	104.55	47	220	0.780906	19	0.449	84.783	45	144	0.938904
20	0.449	146.767	82	232	0.836198	20	0.449	105.05	44	237	0.78464	20	0.449	89.483	45	142	0.990952
21	0.449	146.233	82	223	0.833156	21	0.449	95.867	46	214	0.716051	21	0.449	92.133	41	165	1.0203
22	0.449	141.417	79	213	0.805717	22	0.449	88.583	32	190	0.661645	22	0.449	84.633	45	130	0.937243
23	0.449	138.467	80	227	0.788909	23	0.449	91.917	40	191	0.686547	23	0.449	85.367	52	158	0.945371
24	0.449	145.567	73	255	0.829361	24	0.449	99.183	43	220	0.740818	24	0.449	82.267	43	140	0.911041
25	0.449	139.95	77	234	0.797359	25	0.449	97.733	27	199	0.729988	25	0.449	84.433	45	121	0.935028
26	0.449	139.117	50	227	0.792613	26	0.449	93.083	32	221	0.695256	26	0.449	96.483	59	161	1.06847
27	0.449	150.533	68	254	0.857655	27	0.449	96.417	42	205	0.720159	27	0.449	86.083	35	140	0.9533
28	0.449	143.45	68	245	0.8173	28	0.449	92.467	29	198	0.690655	28	0.449	85.833	49	137	0.950532
29	0.449	139.7	80	206	0.795934	29	0.449	94.3	42	207	0.704346	29	0.449	90.633	49	140	1.00369
30	0.449	138.433	59	236	0.788716	30	0.449	92.333	23	225	0.689654	30	0.449	90.45	57	156	1.00166
1	0.456	144.82	69	250		1	0.456	171.426	94	224		1	0.456	102.869	64	168
2	0.456	122.328	63	206		2	0.456	165.459	114	231		2	0.456	87.82	53	144
3	0.456	158.18	88	255	1	3	0.456	175.016	97	255	1	3	0.456	89.393	57	138	1
4	0.456	121.361	55	249	0.767234	4	0.456	120.525	83	172	0.688651	4	0.456	77.508	40	127	0.867048
5	0.456	122.639	66	255	0.775313	5	0.456	115.23	65	162	0.658397	5	0.456	88.738	51	147	0.992673
6	0.456	118.918	56	209	0.751789	6	0.456	116.918	69	180	0.668042	6	0.456	83.098	43	132	0.929581
7	0.456	124.213	46	255	0.785264	7	0.456	82.557	45	126	0.471711	7	0.456	85.197	46	117	0.953061
8	0.456	144.557	53	255	0.913877	8	0.456	84.885	40	125	0.485013	8	0.456	89.902	56	153	1.00569
9	0.456	134.836	47	255	0.852421	9	0.456	83.525	47	116	0.477242	9	0.456	85.049	45	133	0.951406
10	0.456	118.049	47	255	0.746295	10	0.456	70.869	33	126	0.404929	10	0.456	84.18	51	133	0.941684
11	0.456	113.574	52	255	0.718005	11	0.456	73.721	35	124	0.421224	11	0.456	75.672	40	125	0.846509
12	0.456	113.082	44	255	0.714894	12	0.456	71.77	34	112	0.410077	12	0.456	82.148	38	122	0.918953
13	0.456	102.836	29	255	0.65012	13	0.456	64.525	29	119	0.368681	13	0.456	73.262	41	109	0.81955
14	0.456	88.311	29	252	0.558294	14	0.456	60.951	31	94	0.34826	14	0.456	80.508	44	135	0.900607
15	0.456	94.951	36	241	0.600272	15	0.456	64.967	26	98	0.371206	15	0.456	78.689	44	122	0.880259
16	0.456	57.934	11	113	0.366254	16	0.456	50.836	29	91	0.290465	16	0.456	82.754	42	133	0.925732
17	0.456	67.902	23	174	0.42927	17	0.456	57.967	20	99	0.33121	17	0.456	84.246	48	127	0.942423
18	0.456	69.754	27	218	0.440979	18	0.456	49.574	20	95	0.283254	18	0.456	82.721	47	145	0.925363
19	0.456	69.426	21	216	0.438905	19	0.456	54.164	26	110	0.30948	19	0.456	92.295	46	143	1.03246
20	0.456	61.525	19	163	0.388956	20	0.456	51.639	20	84	0.295053	20	0.456	84.607	43	128	0.946461
21	0.456	60.82	23	142	0.384499	21	0.456	50.967	21	81	0.291213	21	0.456	79.262	44	126	0.886669
22	0.456	66.607	25	195	0.421084	22	0.456	48.623	14	84	0.27782	22	0.456	82.541	43	124	0.92335
23	0.456	54.066	17	113	0.3418	23	0.456	49.131	17	85	0.280723	23	0.456	87.131	48	137	0.974696
24	0.456	51	17	104	0.322417	24	0.456	50.393	18	96	0.287934	24	0.456	84.131	43	138	0.941136
25	0.456	70.459	26	212	0.445436	25	0.456	40.033	13	71	0.228739	25	0.456	91.574	41	153	1.0244
26	0.456	58.443	17	123	0.369471	26	0.456	48.246	25	75	0.275666	26	0.456	84.541	43	154	0.945723
27	0.456	58.967	16	164	0.372784	27	0.456	54.098	28	97	0.309103	27	0.456	82.787	37	143	0.926102
28	0.456	90.984	22	255	0.575193	28	0.456	43.344	11	80	0.247657	28	0.456	73.59	38	109	0.823219
29	0.456	89.049	15	255	0.56296	29	0.456	41.902	13	71	0.239418	29	0.456	80.885	27	128	0.904825
30	0.456	71.525	18	255	0.452175	30	0.456	47.672	16	93	0.272387	30	0.456	80.049	51	125	0.895473
1	0.277	163.676	97	222		1	0.314	117.881	83	164		1	0.314	111.976	68	183
2	0.277	160.189	93	247		2	0.314	115.929	69	180		2	0.314	108.571	67	174
3	0.277	145.189	89	188	1	3	0.314	123.143	75	177	1	3	0.314	108.524	68	170	1
4	0.277	126.541	71	183	0.871561	4	0.314	90.929	43	151	0.738402	4	0.314	104.905	48	162	0.966653
5	0.277	121.351	69	179	0.835814	5	0.314	93.762	52	138	0.761407	5	0.314	96.405	56	158	0.888329
6	0.277	121.297	55	165	0.835442	6	0.314	93.238	44	143	0.757152	6	0.314	104.667	47	163	0.964459
7	0.277	104.351	54	150	0.718725	7	0.314	92.952	49	188	0.75483	7	0.314	108.69	68	155	1.00153
8	0.277	110.811	67	156	0.763219	8	0.314	89.786	45	142	0.72912	8	0.314	107.905	57	177	0.994296
9	0.277	105.622	54	162	0.727479	9	0.314	83.976	44	130	0.681939	9	0.314	110.048	58	152	1.01404
10	0.277	94.865	43	159	0.65339	10	0.314	79.643	43	117	0.646752	10	0.314	99.381	28	141	0.915751
11	0.277	94.324	50	160	0.649664	11	0.314	80.69	33	122	0.655254	11	0.314	106.405	56	166	0.980474
12	0.277	98.459	56	158	0.678144	12	0.314	89.905	48	164	0.730086	12	0.314	97.714	62	155	0.900391
13	0.277	79.486	43	126	0.547466	13	0.314	75.19	52	133	0.610591	13	0.314	98.31	48	131	0.905883
14	0.277	90.216	54	151	0.621369	14	0.314	75.69	34	133	0.614651	14	0.314	99.167	64	154	0.913779
15	0.277	86.378	44	155	0.594935	15	0.314	78.143	38	121	0.634571	15	0.314	100.738	63	184	0.928256
16	0.277	69.973	32	105	0.481944	16	0.314	65.929	27	110	0.535386	16	0.314	103.476	49	172	0.953485
17	0.277	74.081	34	139	0.510238	17	0.314	71.381	31	108	0.579659	17	0.314	101.619	41	149	0.936374
18	0.277	72.405	21	120	0.498695	18	0.314	71.143	33	118	0.577727	18	0.314	104.738	51	148	0.965114
19	0.277	75.162	50	101	0.517684	19	0.314	64.762	35	100	0.525909	19	0.314	93.048	41	129	0.857396
20	0.277	68.054	38	109	0.468727	20	0.314	70.833	33	117	0.575209	20	0.314	94.071	56	147	0.866822
21	0.277	65.459	37	96	0.450854	21	0.314	70.595	43	100	0.573277	21	0.314	94.881	60	143	0.874286
22	0.277	59.919	27	105	0.412697	22	0.314	68.619	44	103	0.55723	22	0.314	103.429	78	150	0.953052
23	0.277	56.486	22	88	0.389052	23	0.314	66.167	40	108	0.537318	23	0.314	99.143	51	135	0.913558
24	0.277	63.973	33	105	0.440619	24	0.314	74.024	28	134	0.601122	24	0.314	101.738	60	146	0.93747
25	0.277	56.865	16	93	0.391662	25	0.314	66.167	33	125	0.537318	25	0.314	92.643	49	147	0.853664
26	0.277	57.324	26	112	0.394823	26	0.314	64.929	25	123	0.527265	26	0.314	95.238	56	152	0.877575
27	0.277	53.486	23	90	0.368389	27	0.314	62.357	27	111	0.506379	27	0.314	97.857	63	149	0.901708
28	0.277	45.649	18	88	0.314411	28	0.314	55.262	30	117	0.448763	28	0.314	101.5	52	163	0.935277
29	0.277	51.946	18	92	0.357782	29	0.314	62.976	32	101	0.511405	29	0.314	95.524	46	139	0.880211
30	0.277	45.459	22	75	0.313102	30	0.314	61.143	35	104	0.49652	30	0.314	93.976	61	139	0.865947
1	0.389	117.615	74	166		1	0.389	249.096	190	255		1	0.389	91.827	54	143
2	0.389	114	69	165		2	0.389	237.712	113	255		2	0.389	88.5	56	135
3	0.389	107.25	48	169	1	3	0.389	245.923	163	255	1	3	0.389	83.038	48	123	1
4	0.389	82.519	41	119	0.769408	4	0.389	243.827	142	255	0.991477	4	0.389	87	44	171	1.04771
5	0.389	91.442	51	126	0.852606	5	0.389	235.442	81	255	0.957381	5	0.389	82.154	39	126	0.989354
6	0.389	93.519	55	133	0.871972	6	0.389	233.846	89	255	0.950891	6	0.389	83.827	52	119	1.0095
7	0.389	74.231	34	105	0.692131	7	0.389	228.288	65	255	0.928291	7	0.389	84.346	39	133	1.01575
8	0.389	88.077	50	151	0.821231	8	0.389	215.731	67	255	0.87723	8	0.389	75	41	105	0.903201
9	0.389	75.769	39	139	0.706471	9	0.389	214.615	30	255	0.872692	9	0.389	74.135	25	134	0.892784
10	0.389	66.904	38	94	0.623814	10	0.389	212.154	45	255	0.862685	10	0.389	78	37	137	0.939329
11	0.389	69.096	46	115	0.644252	11	0.389	207.135	41	255	0.842276	11	0.389	74.269	38	125	0.894398
12	0.389	74.462	42	123	0.694284	12	0.389	187.077	43	255	0.760714	12	0.389	71.462	35	117	0.860594
13	0.389	61.827	26	109	0.576476	13	0.389	200.885	45	255	0.816861	13	0.389	73.327	39	108	0.883054
14	0.389	62.808	25	104	0.585622	14	0.389	207.327	57	255	0.843057	14	0.389	71.712	36	104	0.863605
15	0.389	67.269	29	114	0.627217	15	0.389	199.077	44	255	0.809509	15	0.389	74.231	38	121	0.89394
16	0.389	50.327	24	92	0.469249	16	0.389	198.115	47	255	0.805598	16	0.389	72.769	40	107	0.876334
17	0.389	60.423	22	112	0.563385	17	0.389	195.808	56	255	0.796217	17	0.389	76.346	50	119	0.91941
18	0.389	58.75	37	108	0.547786	18	0.389	196.731	46	255	0.79997	18	0.389	73.615	32	101	0.886522
19	0.389	48.615	23	80	0.453287	19	0.389	220.423	87	255	0.896309	19	0.389	76.308	32	125	0.918953
20	0.389	55.212	31	96	0.514797	20	0.389	201.981	34	255	0.821318	20	0.389	74.096	35	112	0.892314
21	0.389	59.923	24	120	0.558723	21	0.389	214.962	82	255	0.874103	21	0.389	71.962	31	112	0.866615
22	0.389	44	23	68	0.410256	22	0.389	211.077	70	255	0.858305	22	0.389	76.173	38	133	0.917327
23	0.389	50.385	11	86	0.46979	23	0.389	205.827	72	255	0.836957	23	0.389	67.308	37	111	0.810569
24	0.389	51.404	21	88	0.479291	24	0.389	212.019	69	255	0.862136	24	0.389	67.827	30	105	0.816819
25	0.389	39.981	16	67	0.372783	25	0.389	206.308	66	255	0.838913	25	0.389	76.827	46	124	0.925203
26	0.389	49.654	24	96	0.462974	26	0.389	189.346	39	255	0.76994	26	0.389	70.596	32	97	0.850165
27	0.389	45.615	26	79	0.425315	27	0.389	192.731	52	255	0.783705	27	0.389	73.442	37	114	0.884438
28	0.389	41.077	2	71	0.383002	28	0.389	189.442	50	255	0.770331	28	0.389	75.885	35	131	0.913859
29	0.389	42.75	16	80	0.398601	29	0.389	184.308	32	255	0.749454	29	0.389	75.096	45	125	0.904357
30	0.389	50.519	19	99	0.47104	30	0.389	175.481	34	255	0.713561	30	0.389	66.365	40	105	0.799212
1	0.269	78.333	40	118		1	0.269	77.889	42	125		1	0.524	90.943	41	165
2	0.269	78.056	48	140		2	0.269	74.917	36	124		2	0.524	80.043	43	125
3	0.269	72.5	32	118	1	3	0.269	67.944	40	102	1	3	0.524	78.143	38	126	1
4	0.269	68.972	41	123	0.951338	4	0.269	64.472	28	118	0.948899	4	0.524	66.914	20	110	0.856302
5	0.269	74.889	22	130	1.03295	5	0.269	61.5	23	94	0.905157	5	0.524	70.3	32	113	0.899633
6	0.269	66.917	26	120	0.922993	6	0.269	63.333	31	95	0.932135	6	0.524	73.343	28	116	0.938574
7	0.269	67.333	29	113	0.928731	7	0.269	56.167	26	88	0.826666	7	0.524	71.614	29	124	0.916448
8	0.269	62.389	38	112	0.860538	8	0.269	57.083	22	98	0.840148	8	0.524	67.457	27	130	0.863251
9	0.269	64.611	27	109	0.891186	9	0.269	58.139	16	102	0.85569	9	0.524	67.471	38	104	0.86343
10	0.269	58.694	29	94	0.809572	10	0.269	48.472	26	90	0.713411	10	0.524	70.829	35	119	0.906402
11	0.269	60.611	25	111	0.836014	11	0.269	54.833	21	91	0.807032	11	0.524	70.343	31	139	0.900183
12	0.269	64.5	31	130	0.889655	12	0.269	53.167	21	76	0.782512	12	0.524	66.329	27	122	0.848816
13	0.269	60.889	20	99	0.839848	13	0.269	46.722	15	94	0.687655	13	0.524	70.1	27	123	0.897073
14	0.269	60.194	28	101	0.830262	14	0.269	55.083	18	101	0.810712	14	0.524	63.071	29	106	0.807123
15	0.269	59.861	35	94	0.825669	15	0.269	58.694	26	109	0.863858	15	0.524	63.6	21	109	0.813892
16	0.269	52.861	20	97	0.729117	16	0.269	43.139	17	99	0.63492	16	0.524	67.129	28	113	0.859053
17	0.269	53.528	20	85	0.738317	17	0.269	48.5	16	105	0.713823	17	0.524	77.486	37	137	0.991592
18	0.269	51.083	23	83	0.704593	18	0.269	48.917	16	117	0.719961	18	0.524	64.671	32	128	0.827598
19	0.269	56.222	17	95	0.775476	19	0.269	39.778	14	77	0.585453	19	0.524	63.271	13	104	0.809682
20	0.269	51.972	20	73	0.716855	20	0.269	46.333	21	77	0.681929	20	0.524	68.271	25	129	0.873668
21	0.269	49.889	20	89	0.688124	21	0.269	53.944	22	118	0.793948	21	0.524	69.757	35	120	0.892684
22	0.269	54.611	26	102	0.753255	22	0.269	40.111	15	74	0.590354	22	0.524	70.071	29	115	0.896702
23	0.269	43.917	22	77	0.605752	23	0.269	40.5	11	68	0.596079	23	0.524	65.471	25	108	0.837836
24	0.269	45.111	23	87	0.622221	24	0.269	45.778	17	103	0.673761	24	0.524	65.514	23	117	0.838386
25	0.269	51.25	18	86	0.706897	25	0.269	38.361	10	59	0.564597	25	0.524	60.014	31	100	0.768002
26	0.269	49.639	26	78	0.684676	26	0.269	36.333	16	66	0.534749	26	0.524	64.386	25	101	0.823951
27	0.269	47.944	25	82	0.661297	27	0.269	38.528	13	90	0.567055	27	0.524	66.314	24	122	0.848624
28	0.269	42.472	17	102	0.585821	28	0.269	35.083	12	86	0.516352	28	0.524	63.557	33	120	0.813342
29	0.269	46.028	13	88	0.634869	29	0.269	35.5	10	55	0.522489	29	0.524	64.557	27	109	0.826139
30	0.269	44.528	22	86	0.614179	30	0.269	38.528	3	66	0.567055	30	0.524	61.557	17	103	0.787748
1	0.269	189.222	111	247		1	0.269	175.972	87	255		1	0.449	149.983	86	212
2	0.269	183.056	85	247		2	0.269	155.139	62	248		2	0.449	135.1	76	226
3	0.269	158.083	85	244	1	3	0.269	148.361	76	251	1	3	0.449	141.8	72	205	1
4	0.269	157.667	81	244	0.997368	4	0.269	141.917	63	230	0.956565	4	0.449	133.867	68	219	0.944055
5	0.269	168.944	89	245	1.0687	5	0.269	152.944	76	255	1.03089	5	0.449	136.1	78	196	0.959803
6	0.269	154.139	88	224	0.975051	6	0.269	144.833	38	234	0.97622	6	0.449	117.617	51	169	0.829457
7	0.269	141.917	69	214	0.897737	7	0.269	147.333	61	222	0.993071	7	0.449	116.633	61	195	0.822518
8	0.269	126.639	51	227	0.801092	8	0.269	143.444	66	255	0.966858	8	0.449	116.967	68	157	0.824873
9	0.269	140.75	69	218	0.890355	9	0.269	145.722	62	255	0.982212	9	0.449	109.65	62	184	0.773272
10	0.269	122	39	216	0.771746	10	0.269	139	50	254	0.936904	10	0.449	125.733	71	199	0.886693
11	0.269	113.278	56	197	0.716573	11	0.269	128.139	58	255	0.863697	11	0.449	121.25	61	180	0.855078
12	0.269	122.861	69	192	0.777193	12	0.269	134.694	66	248	0.90788	12	0.449	122.133	61	215	0.861305
13	0.269	107.194	35	186	0.678087	13	0.269	121.861	47	255	0.821382	13	0.449	123.833	57	179	0.873293
14	0.269	98.361	49	161	0.622211	14	0.269	126.111	50	238	0.850028	14	0.449	120.317	68	187	0.848498
15	0.269	107.778	27	194	0.681781	15	0.269	115.889	48	211	0.781128	15	0.449	119.117	62	164	0.840035
16	0.269	97.083	49	162	0.614127	16	0.269	111.25	48	215	0.74986	16	0.449	113.083	71	209	0.797482
17	0.269	111.972	46	230	0.708311	17	0.269	118.556	42	234	0.799105	17	0.449	115.417	58	172	0.813942
18	0.269	114.139	66	202	0.722019	18	0.269	121.139	49	243	0.816515	18	0.449	110.4	47	174	0.778561
19	0.269	91.278	51	157	0.577406	19	0.269	100.25	48	236	0.675717	19	0.449	118.7	66	191	0.837094
20	0.269	100.028	49	170	0.632756	20	0.269	111.028	48	205	0.748364	20	0.449	118.883	62	187	0.838385
21	0.269	112.472	61	187	0.711474	21	0.269	112.056	51	196	0.755293	21	0.449	124.633	69	213	0.878935
22	0.269	93.528	51	160	0.591639	22	0.269	111.167	48	221	0.749301	22	0.449	118.767	64	207	0.837567
23	0.269	90.611	54	154	0.573186	23	0.269	109.361	52	208	0.737128	23	0.449	119.55	59	171	0.843089
24	0.269	100.028	40	202	0.632756	24	0.269	96.722	44	198	0.651937	24	0.449	116.217	55	161	0.819584
25	0.269	96.222	47	150	0.60868	25	0.269	96.972	31	193	0.653622	25	0.449	117.05	42	185	0.825458
26	0.269	111.361	69	191	0.704446	26	0.269	95.917	42	185	0.646511	26	0.449	111.267	56	165	0.784676
27	0.269	99.333	47	187	0.62836	27	0.269	103.111	42	183	0.695001	27	0.449	113.367	54	174	0.799485
28	0.269	93.222	49	180	0.589703	28	0.269	90.556	33	245	0.610376	28	0.449	114.683	60	176	0.808766
29	0.269	102.694	49	176	0.649621	29	0.269	83.694	20	145	0.564124	29	0.449	108.133	55	209	0.762574
30	0.269	100	45	171	0.632579	30	0.269	89.944	30	179	0.606251	30	0.449	107.8	39	205	0.760226
1	0.232	91.968	47	149		1	0.232	179.194	101	254		1	0.18	79.292	44	128
2	0.232	88.355	56	143		2	0.232	178.29	101	255		2	0.18	85.917	54	120
3	0.232	79.645	39	125	1	3	0.232	154.452	89	237	1	3	0.18	79.625	45	120	1
4	0.232	69.323	36	121	0.8704	4	0.232	158.355	100	229	1.02527	4	0.18	76.25	47	104	0.957614
5	0.232	78.645	39	111	0.987444	5	0.232	149.032	40	231	0.964908	5	0.18	72.75	33	100	0.913658
6	0.232	79.323	39	122	0.995957	6	0.232	147.452	81	255	0.954678	6	0.18	78.375	47	111	0.984301
7	0.232	82.774	51	110	1.03929	7	0.232	145.194	69	233	0.940059	7	0.18	77.917	44	119	0.978549
8	0.232	75.323	42	107	0.945734	8	0.232	124.065	74	208	0.803259	8	0.18	76.917	49	110	0.965991
9	0.232	69.613	40	97	0.874041	9	0.232	136.258	62	216	0.882203	9	0.18	78.417	48	112	0.984829
10	0.232	70.71	35	117	0.887815	10	0.232	114.323	70	165	0.740185	10	0.18	70	40	101	0.879121
11	0.232	75.935	38	125	0.953418	11	0.232	127.323	55	206	0.824353	11	0.18	82.542	59	116	1.03663
12	0.232	78.129	42	113	0.980966	12	0.232	114.774	48	174	0.743105	12	0.18	82.208	50	121	1.03244
13	0.232	72.742	36	117	0.913328	13	0.232	126.226	71	198	0.817251	13	0.18	71.417	50	105	0.896917
14	0.232	72.161	38	109	0.906033	14	0.232	119.161	70	172	0.771508	14	0.18	72.75	48	106	0.913658
15	0.232	77.161	30	116	0.968812	15	0.232	110.903	75	165	0.718042	15	0.18	82.042	53	117	1.03035
16	0.232	68.774	30	108	0.863507	16	0.232	136.903	65	213	0.886379	16	0.18	72.667	51	110	0.912615
17	0.232	70.484	42	114	0.884977	17	0.232	124.806	80	190	0.808057	17	0.18	72.042	33	109	0.904766
18	0.232	68.355	30	114	0.858246	18	0.232	113.387	78	146	0.734125	18	0.18	77.375	39	141	0.971743
19	0.232	76.613	47	109	0.961931	19	0.232	121.935	59	176	0.789469	19	0.18	77.25	47	138	0.970173
20	0.232	75.065	37	125	0.942495	20	0.232	120.226	66	179	0.778404	20	0.18	78.833	44	119	0.990053
21	0.232	68.452	32	95	0.859464	21	0.232	117.968	80	159	0.763784	21	0.18	89.583	66	128	1.12506
22	0.232	68.645	42	97	0.861887	22	0.232	127.548	62	197	0.82581	22	0.18	73.333	46	95	0.92098
23	0.232	73	45	118	0.916567	23	0.232	112.806	75	183	0.730363	23	0.18	78	61	114	0.979592
24	0.232	69.355	42	108	0.870802	24	0.232	115.29	73	169	0.746445	24	0.18	77	38	107	0.967033
25	0.232	73.806	38	114	0.926687	25	0.232	115.581	41	229	0.74833	25	0.18	77	44	106	0.967033
26	0.232	64.258	33	90	0.806805	26	0.232	117.581	73	171	0.761279	26	0.18	73.292	45	102	0.920465
27	0.232	68.871	44	125	0.864725	27	0.232	106.839	63	185	0.691729	27	0.18	71.083	29	95	0.892722
28	0.232	71.226	46	95	0.894293	28	0.232	116.71	59	177	0.755639	28	0.18	80.792	47	121	1.01466
29	0.232	68.29	43	117	0.85743	29	0.232	115.613	59	172	0.748537	29	0.18	82.292	55	117	1.03349
30	0.232	67.742	33	112	0.850549	30	0.232	110	52	170	0.712195	30	0.18	75.375	43	105	0.946625
1	0.382	138.51	91	189		1	0.382	185.902	115	255		1	0.382	114.686	59	178
2	0.382	132.902	85	205		2	0.382	184.137	92	255		2	0.382	115.176	72	169
3	0.382	132.098	73	208	1	3	0.382	187.882	125	255	1	3	0.382	113.059	62	170	1
4	0.382	118.118	65	161	0.894169	4	0.382	133.706	70	241	0.711649	4	0.382	105.51	58	162	0.93323
5	0.382	123.941	82	176	0.93825	5	0.382	128.373	76	201	0.683264	5	0.382	115.02	74	162	1.01734
6	0.382	121.039	75	175	0.916282	6	0.382	128	65	180	0.681279	6	0.382	111.804	61	151	0.9889
7	0.382	98.431	51	137	0.745136	7	0.382	114.431	67	194	0.609058	7	0.382	108.471	74	166	0.959419
8	0.382	101.039	66	146	0.764879	8	0.382	118	58	197	0.628054	8	0.382	111.02	63	162	0.981965
9	0.382	100.059	58	154	0.75746	9	0.382	108.235	48	226	0.57608	9	0.382	100.647	56	152	0.890217
10	0.382	90.412	45	129	0.684431	10	0.382	99.098	56	158	0.527448	10	0.382	106.667	54	148	0.943463
11	0.382	84.098	27	137	0.636633	11	0.382	100.549	53	201	0.535171	11	0.382	107.373	49	165	0.949708
12	0.382	88.569	53	144	0.670479	12	0.382	100.902	54	166	0.53705	12	0.382	103.392	59	145	0.914496
13	0.382	88.824	50	158	0.67241	13	0.382	86.451	45	200	0.460135	13	0.382	106.49	69	160	0.941898
14	0.382	80.569	46	133	0.609918	14	0.382	88.608	40	141	0.471615	14	0.382	111	71	174	0.981788
15	0.382	90	45	152	0.681312	15	0.382	88.824	49	160	0.472765	15	0.382	110.608	66	171	0.978321
16	0.382	75.353	40	120	0.570433	16	0.382	81.255	35	137	0.432479	16	0.382	102.235	66	163	0.904262
17	0.382	90.627	55	161	0.686059	17	0.382	88.706	52	164	0.472137	17	0.382	101.118	61	136	0.894383
18	0.382	87.078	40	153	0.659192	18	0.382	93.431	46	160	0.497286	18	0.382	103.451	58	148	0.915018
19	0.382	72.765	38	120	0.550841	19	0.382	77.725	41	121	0.413691	19	0.382	100.373	55	152	0.887793
20	0.382	83.039	49	111	0.628617	20	0.382	73.922	47	151	0.393449	20	0.382	101.725	61	132	0.899751
21	0.382	87.627	49	126	0.663348	21	0.382	82.922	39	145	0.441351	21	0.382	104.667	64	148	0.925773
22	0.382	73.765	39	123	0.558411	22	0.382	78.333	19	152	0.416927	22	0.382	103.373	65	143	0.914328
23	0.382	72.216	32	129	0.546685	23	0.382	72.294	25	128	0.384784	23	0.382	110.235	75	145	0.975022
24	0.382	76.51	43	120	0.579191	24	0.382	78	27	122	0.415154	24	0.382	99.608	69	137	0.881027
25	0.382	66.627	25	95	0.504376	25	0.382	63.078	32	126	0.335732	25	0.382	111.451	74	154	0.985777
26	0.382	63.961	36	116	0.484194	26	0.382	70.784	30	108	0.376747	26	0.382	101.922	54	150	0.901494
27	0.382	65.412	32	120	0.495178	27	0.382	68.961	32	115	0.367044	27	0.382	105.961	53	149	0.937219
28	0.382	58.333	18	139	0.441589	28	0.382	69.627	17	111	0.370589	28	0.382	103.353	68	170	0.914151
29	0.382	56.412	30	86	0.427047	29	0.382	63.804	28	110	0.339596	29	0.382	96.784	57	140	0.856049
30	0.382	66	25	123	0.499629	30	0.382	64.941	29	102	0.345648	30	0.382	101.608	52	154	0.898717
1	0.329	130.864	70	205		1	0.329	118.227	63	177		1	0.329	65.705	24	106
2	0.329	118.5	59	175		2	0.329	117.341	77	165		2	0.329	60.455	12	100
3	0.329	105.977	44	154	1	3	0.329	124.477	80	195	1	3	0.329	57.659	28	85	1
4	0.329	97.068	52	146	0.915935	4	0.329	100.341	52	162	0.806101	4	0.329	61.136	26	120	1.0603
5	0.329	89.318	55	145	0.842806	5	0.329	103.568	64	153	0.832025	5	0.329	56.659	30	83	0.982657
6	0.329	93.5	60	139	0.882267	6	0.329	106.636	58	156	0.856672	6	0.329	52.386	14	89	0.908549
7	0.329	92	47	149	0.868113	7	0.329	86.432	41	123	0.694361	7	0.329	49.273	23	97	0.854559
8	0.329	92.25	53	134	0.870472	8	0.329	90.318	43	148	0.72558	8	0.329	56.841	18	95	0.985813
9	0.329	86.364	45	154	0.814932	9	0.329	92.727	50	154	0.744933	9	0.329	58.841	28	93	1.0205
10	0.329	78.023	43	125	0.736226	10	0.329	83.659	46	121	0.672084	10	0.329	63.545	32	93	1.10208
11	0.329	83.682	50	142	0.789624	11	0.329	95.386	45	154	0.766294	11	0.329	60.977	22	103	1.05755
12	0.329	90.659	47	175	0.855459	12	0.329	94.364	56	146	0.758084	12	0.329	61.455	27	101	1.06584
13	0.329	77.977	35	132	0.735792	13	0.329	77.659	42	118	0.623882	13	0.329	63.136	35	107	1.09499
14	0.329	85.273	34	146	0.804637	14	0.329	77.159	42	131	0.619866	14	0.329	56.909	30	93	0.986992
15	0.329	77.909	23	168	0.73515	15	0.329	81.864	55	124	0.657664	15	0.329	60.705	25	110	1.05283
16	0.329	74.886	38	139	0.706625	16	0.329	77.795	41	118	0.624975	16	0.329	55.886	23	84	0.96925
17	0.329	82.023	50	143	0.77397	17	0.329	68.614	27	106	0.551218	17	0.329	58.295	19	91	1.01103
18	0.329	77.159	41	132	0.728073	18	0.329	67.182	31	103	0.539714	18	0.329	56.614	30	98	0.981876
19	0.329	69.136	37	114	0.652368	19	0.329	64.841	33	108	0.520907	19	0.329	58.045	29	111	1.00669
20	0.329	61.364	23	118	0.579031	20	0.329	68.227	39	112	0.548109	20	0.329	59.886	25	97	1.03862
21	0.329	69.25	30	111	0.653444	21	0.329	67.568	37	99	0.542815	21	0.329	57.545	23	97	0.998023
22	0.329	64.75	29	112	0.610982	22	0.329	60.091	31	95	0.482748	22	0.329	61.864	35	92	1.07293
23	0.329	70.227	34	117	0.662663	23	0.329	68.25	30	108	0.548294	23	0.329	61.045	30	124	1.05872
24	0.329	64.568	26	106	0.609264	24	0.329	66.25	35	120	0.532227	24	0.329	56.841	28	114	0.985813
25	0.329	57.864	27	95	0.546005	25	0.329	63.841	21	93	0.512874	25	0.329	56.659	25	90	0.982657
26	0.329	58.295	24	105	0.550072	26	0.329	59.909	30	96	0.481286	26	0.329	57.136	34	85	0.990929
27	0.329	59.182	34	98	0.558442	27	0.329	61.841	19	97	0.496807	27	0.329	55.614	17	99	0.964533
28	0.329	53.955	28	93	0.50912	28	0.329	57.773	25	100	0.464126	28	0.329	57.114	26	81	0.990548
29	0.329	57.023	22	106	0.53807	29	0.329	52.205	22	88	0.419395	29	0.329	53.886	16	81	0.934564
30	0.329	52.068	23	91	0.491314	30	0.329	51.909	21	89	0.417017	30	0.329	60.045	30	100	1.04138
1	0.269	77.389	31	128		1	0.644	94.849	31	156		1	0.644	59.93	26	94
2	0.269	68.222	20	102		2	0.644	87.802	33	131		2	0.644	52.523	20	100
3	0.269	64.528	32	104	1	3	0.644	89.767	37	153	1	3	0.644	52.802	19	89	1
4	0.269	54.75	21	84	0.848469	4	0.644	71.07	27	115	0.791716	4	0.644	48	19	84	0.909056
5	0.269	55.556	30	89	0.86096	5	0.644	72.151	26	132	0.803759	5	0.644	47.151	16	83	0.892978
6	0.269	61.667	25	110	0.955663	6	0.644	74.605	30	132	0.831096	6	0.644	50.058	21	97	0.948032
7	0.269	50.444	29	80	0.781738	7	0.644	69.535	29	139	0.774617	7	0.644	53.233	20	95	1.00816
8	0.269	54.5	27	89	0.844595	8	0.644	72.756	37	133	0.810498	8	0.644	51.43	20	95	0.974016
9	0.269	54.528	26	88	0.845029	9	0.644	76.802	29	120	0.855571	9	0.644	47.128	20	76	0.892542
10	0.269	45.611	23	74	0.70684	10	0.644	74.616	22	130	0.831219	10	0.644	49.116	12	98	0.930192
11	0.269	56.417	27	105	0.874303	11	0.644	76.233	35	133	0.849232	11	0.644	47.198	18	81	0.893868
12	0.269	55.167	30	88	0.854931	12	0.644	79.198	35	169	0.882262	12	0.644	49.581	18	94	0.938999
13	0.269	48.389	19	82	0.749892	13	0.644	74.895	34	133	0.834327	13	0.644	50.884	24	100	0.963676
14	0.269	45.694	17	83	0.708127	14	0.644	68.628	16	115	0.764513	14	0.644	49.186	18	89	0.931518
15	0.269	51.694	27	88	0.80111	15	0.644	65.837	31	118	0.733421	15	0.644	48.302	8	88	0.914776
16	0.269	48.861	21	86	0.757206	16	0.644	64.86	28	120	0.722537	16	0.644	48.36	25	109	0.915874
17	0.269	44.75	21	76	0.693497	17	0.644	56.884	16	106	0.633685	17	0.644	47.733	20	80	0.904
18	0.269	41.667	11	64	0.64572	18	0.644	55.209	19	101	0.615026	18	0.644	49.942	21	103	0.945835
19	0.269	41.778	15	76	0.64744	19	0.644	51.128	23	96	0.569563	19	0.644	42.395	19	66	0.802905
20	0.269	42	21	77	0.65088	20	0.644	48.186	17	115	0.53679	20	0.644	46.233	16	84	0.875592
21	0.269	45.528	16	92	0.705554	21	0.644	50.872	26	89	0.566712	21	0.644	46.977	22	86	0.889682
22	0.269	43.861	23	76	0.67972	22	0.644	48.535	13	86	0.540678	22	0.644	47.116	21	77	0.892315
23	0.269	42.333	21	84	0.656041	23	0.644	47.802	21	82	0.532512	23	0.644	46.849	16	88	0.887258
24	0.269	44.083	18	80	0.683161	24	0.644	55.105	22	96	0.613867	24	0.644	45.314	21	85	0.858187
25	0.269	40.194	9	57	0.622892	25	0.644	51.384	16	85	0.572415	25	0.644	46.198	13	79	0.874929
26	0.269	47.167	24	77	0.730954	26	0.644	50.628	18	94	0.563993	26	0.644	48.5	11	89	0.918526
27	0.269	45.028	4	84	0.697806	27	0.644	50.953	20	93	0.567614	27	0.644	48.57	15	79	0.919852
28	0.269	43.694	15	71	0.677132	28	0.644	49.128	20	88	0.547284	28	0.644	50.221	15	93	0.951119
29	0.269	46.806	22	82	0.72536	29	0.644	48.663	13	108	0.542103	29	0.644	49.663	11	99	0.940551
30	0.269	38.583	11	65	0.597926	30	0.644	47.64	18	93	0.530707	30	0.644	43.349	13	72	0.820973
1	0.329	103.614	65	164		1	0.329	222.909	118	255		1	0.329	87	50	135
2	0.329	93	59	137		2	0.329	217	78	255		2	0.329	86.636	51	120
3	0.329	95.705	53	133	1	3	0.329	219.295	48	255	1	3	0.329	86.364	53	138	1
4	0.329	68.455	43	126	0.715271	4	0.329	204.795	68	255	0.933879	4	0.329	83.955	46	133	0.972106
5	0.329	77.727	39	120	0.812152	5	0.329	210.523	116	255	0.959999	5	0.329	90.023	40	136	1.04237
6	0.329	73.159	37	106	0.764422	6	0.329	210.182	84	255	0.958444	6	0.329	83.795	44	126	0.970254
7	0.329	65	22	119	0.67917	7	0.329	193.818	79	255	0.883823	7	0.329	79.341	38	129	0.918681
8	0.329	66.477	35	109	0.694603	8	0.329	170.477	40	255	0.777387	8	0.329	82.273	45	126	0.952631
9	0.329	70.909	40	110	0.740912	9	0.329	188.25	29	255	0.858433	9	0.329	73.659	38	127	0.85289
10	0.329	60.182	35	97	0.628828	10	0.329	152.682	30	255	0.69624	10	0.329	76.864	48	126	0.89
11	0.329	64.091	21	127	0.669672	11	0.329	127.614	34	255	0.581928	11	0.329	76.591	35	124	0.886839
12	0.329	63.795	32	110	0.66658	12	0.329	134.409	35	255	0.612914	12	0.329	75.841	35	127	0.878155
13	0.329	52.068	28	77	0.544047	13	0.329	126.682	32	255	0.577678	13	0.329	74.318	27	130	0.860521
14	0.329	53.432	32	81	0.558299	14	0.329	120.045	17	255	0.547413	14	0.329	71.455	33	121	0.82737
15	0.329	63.182	40	90	0.660174	15	0.329	133.455	21	255	0.608564	15	0.329	67.977	14	101	0.787099
16	0.329	49.523	10	96	0.517455	16	0.329	122.568	28	255	0.558918	16	0.329	74.205	31	110	0.859212
17	0.329	50.477	20	78	0.527423	17	0.329	133.295	24	255	0.607834	17	0.329	75.182	42	109	0.870525
18	0.329	51.523	22	92	0.538352	18	0.329	111.773	23	255	0.509692	18	0.329	76.886	42	117	0.890255
19	0.329	48.682	28	74	0.508667	19	0.329	94.068	22	234	0.428956	19	0.329	70.636	33	111	0.817887
20	0.329	48.614	17	85	0.507957	20	0.329	94.636	15	177	0.431547	20	0.329	72.591	34	112	0.840524
21	0.329	52.318	20	83	0.546659	21	0.329	81.159	20	197	0.370091	21	0.329	75.5	28	127	0.874207
22	0.329	44.636	17	80	0.466392	22	0.329	81.909	18	167	0.373511	22	0.329	78.932	39	167	0.913946
23	0.329	52.25	31	88	0.545948	23	0.329	85.659	21	216	0.390611	23	0.329	82.045	38	130	0.949991
24	0.329	53.614	21	96	0.560201	24	0.329	86.682	14	177	0.395276	24	0.329	81.045	30	159	0.938412
25	0.329	43.568	22	71	0.455232	25	0.329	70.705	16	160	0.32242	25	0.329	78.682	28	134	0.911051
26	0.329	47.114	23	77	0.492284	26	0.329	75.477	16	146	0.34418	26	0.329	77.773	31	134	0.900526
27	0.329	49.136	15	85	0.513411	27	0.329	95.909	30	217	0.437352	27	0.329	75.727	38	120	0.876835
28	0.329	37.409	12	73	0.390878	28	0.329	77.273	23	145	0.35237	28	0.329	74.636	28	116	0.864203
29	0.329	39.864	17	73	0.41653	29	0.329	70.273	18	156	0.32045	29	0.329	74.386	48	113	0.861308
30	0.329	44.341	11	70	0.463309	30	0.329	83.636	17	166	0.381386	30	0.329	78.273	41	121	0.906315
1	0.389	133.346	81	205		1	0.389	190.481	112	255
2	0.389	122.25	70	170		2	0.389	178.442	65	255
3	0.389	126.404	72	204		3	0.389	159.75	80	255
4	0.389	86.423	46	133		4	0.389	150.712	45	255
5	0.389	89.923	55	137		5	0.389	142.538	61	255
6	0.389	92.75	56	147		6	0.389	151.865	65	255
7	0.389	77.192	33	129		7	0.389	141.962	63	255
8	0.389	80.769	38	146		8	0.389	120	43	255
9	0.389	86.635	45	136		9	0.389	138.538	48	255
10	0.389	73.173	38	110		10	0.389	123.038	29	255
11	0.389	81.712	31	127		11	0.389	133.865	46	255
12	0.389	83.942	41	136		12	0.389	141.365	51	255
13	0.389	66.404	33	114		13	0.389	133.731	44	255
14	0.389	68.154	29	110		14	0.389	131.923	40	255
15	0.389	72.981	37	114		15	0.389	124.865	30	255
16	0.389	62.135	35	129		16	0.389	104.827	21	255
17	0.389	71.615	23	194		17	0.389	77.019	20	255
18	0.389	68.615	25	217		18	0.389	66.135	14	255
19	0.389	60.538	28	235		19	0.389	56.288	15	245
20	0.389	63.135	22	160		20	0.389	43	6	92
21	0.389	66.327	19	193		21	0.389	48.519	14	102
22	0.389	61.712	26	195		22	0.389	39.692	11	80
23	0.389	62.865	24	150		23	0.389	43.923	13	118
24	0.389	60.981	24	134		24	0.389	45.942	9	117
25	0.389	52.058	20	121		25	0.389	39.077	10	83
26	0.389	53.077	20	129		26	0.389	39.346	5	95
27	0.389	55.827	13	100		27	0.389	34.769	12	80
28	0.389	57.808	9	155		28	0.389	29.654	3	71
29	0.389	64.269	25	218		29	0.389	31.769	9	66
30	0.389	70.385	15	249		30	0.389	32.981	9	80
1	0.329	128.364	68	172		1	0.329	104.455	66	163		1	0.778	96.808	53	151
2	0.329	113.136	71	177		2	0.329	103.841	60	159		2	0.778	89.279	50	131
3	0.329	104.455	44	168	1	3	0.329	102.591	46	146	1	3	0.778	80.144	24	133	1
4	0.329	89.932	51	157	0.860964	4	0.329	83.477	26	117	0.813687	4	0.778	84.404	45	129	1.05315
5	0.329	100.25	67	148	0.959743	5	0.329	83.068	30	122	0.809701	5	0.778	79.817	47	141	0.99592
6	0.329	87.432	48	142	0.83703	6	0.329	84.955	43	122	0.828094	6	0.778	82.356	31	144	1.0276
7	0.329	82.705	48	119	0.791776	7	0.329	76.682	8	124	0.747453	7	0.778	81.769	39	148	1.02028
8	0.329	76.477	42	130	0.732153	8	0.329	81.045	33	135	0.789982	8	0.778	79.192	34	131	0.988121
9	0.329	77.682	49	115	0.743689	9	0.329	84.045	45	146	0.819224	9	0.778	78.144	42	135	0.975045
10	0.329	79.386	38	119	0.760002	10	0.329	71.5	35	136	0.696942	10	0.778	70.26	22	114	0.876672
11	0.329	79.477	41	130	0.760873	11	0.329	68.25	30	106	0.665263	11	0.778	75	48	111	0.935816
12	0.329	82.864	39	132	0.793299	12	0.329	72.364	35	136	0.705364	12	0.778	78.875	34	122	0.984166
13	0.329	71.409	29	114	0.683634	13	0.329	66.364	33	100	0.646879	13	0.778	73.596	33	118	0.918297
14	0.329	74.955	46	112	0.717582	14	0.329	64.636	28	126	0.630036	14	0.778	74.067	37	124	0.924174
15	0.329	70.386	38	97	0.67384	15	0.329	67.205	24	144	0.655077	15	0.778	74.24	33	115	0.926333
16	0.329	70.773	39	113	0.677545	16	0.329	56.091	21	99	0.546744	16	0.778	75.683	35	134	0.944338
17	0.329	69.659	31	109	0.66688	17	0.329	59.364	33	102	0.578647	17	0.778	71.538	29	130	0.892618
18	0.329	73.75	40	126	0.706046	18	0.329	61.045	17	95	0.595033	18	0.778	72.115	33	125	0.899818
19	0.329	65.091	36	108	0.623149	19	0.329	54.205	25	94	0.52836	19	0.778	69.548	30	112	0.867788
20	0.329	65.114	38	90	0.623369	20	0.329	58.114	24	100	0.566463	20	0.778	76.346	35	127	0.95261
21	0.329	65.568	28	123	0.627715	21	0.329	55.318	23	121	0.539209	21	0.778	75.856	39	122	0.946496
22	0.329	58.341	22	104	0.558528	22	0.329	47.205	26	76	0.460128	22	0.778	75.875	44	114	0.946733
23	0.329	55.295	30	86	0.529367	23	0.329	52.091	26	101	0.507754	23	0.778	76.067	39	123	0.949129
24	0.329	62.841	35	95	0.601608	24	0.329	48.591	11	87	0.473638	24	0.778	77.635	24	152	0.968694
25	0.329	62.659	26	106	0.599866	25	0.329	44.182	19	82	0.430662	25	0.778	75.202	26	124	0.938336
26	0.329	56.386	23	101	0.539811	26	0.329	47.341	18	86	0.461454	26	0.778	75.308	38	124	0.939659
27	0.329	59.318	35	106	0.567881	27	0.329	48.477	10	82	0.472527	27	0.778	71.279	40	123	0.889387
28	0.329	54.795	25	106	0.52458	28	0.329	46.136	13	77	0.449708	28	0.778	71.154	29	119	0.887827
29	0.329	55.386	18	97	0.530238	29	0.329	46.023	18	91	0.448607	29	0.778	78.298	37	115	0.976966
30	0.329	53.432	28	94	0.511531	30	0.329	49.886	26	99	0.486261	30	0.778	74.865	30	124	0.934131
1	0.195	124.654	76	183		1	0.195	108.346	60	150		1	0.195	119.192	68	156
2	0.195	113.346	51	163		2	0.195	95.538	49	138		2	0.195	106.423	53	160
3	0.195	98.577	58	146	1	3	0.195	95.192	59	165	1	3	0.195	97.308	64	136	1
4	0.195	71.962	48	108	0.730008	4	0.195	77.385	48	130	0.812936	4	0.195	97.346	44	142	1.00039
5	0.195	74.538	47	124	0.75614	5	0.195	82.385	48	106	0.865461	5	0.195	92.385	60	124	0.949408
6	0.195	75.923	30	143	0.77019	6	0.195	83.308	43	127	0.875158	6	0.195	88.115	49	150	0.905527
7	0.195	77.846	42	127	0.789697	7	0.195	66.154	28	99	0.694953	7	0.195	95.231	58	139	0.978655
8	0.195	75.038	51	118	0.761212	8	0.195	69.462	27	112	0.729704	8	0.195	93.577	55	134	0.961658
9	0.195	75.077	35	107	0.761608	9	0.195	72.538	28	110	0.762018	9	0.195	83.654	51	144	0.859683
10	0.195	65.038	36	86	0.659769	10	0.195	60.038	42	88	0.630704	10	0.195	86.769	53	146	0.891694
11	0.195	63.038	33	113	0.63948	11	0.195	67.385	26	97	0.707885	11	0.195	100.808	56	156	1.03597
12	0.195	64.962	39	101	0.658998	12	0.195	68.769	44	99	0.722424	12	0.195	82.385	37	131	0.846642
13	0.195	62.038	38	81	0.629335	13	0.195	60.577	31	101	0.636367	13	0.195	94.846	65	147	0.974699
14	0.195	64.269	32	104	0.651967	14	0.195	56.769	28	94	0.596363	14	0.195	91.154	46	139	0.936758
15	0.195	54.308	24	82	0.55092	15	0.195	56.923	30	90	0.597981	15	0.195	86.308	49	118	0.886957
16	0.195	55.269	35	95	0.560668	16	0.195	52.269	22	84	0.54909	16	0.195	83.308	66	113	0.856127
17	0.195	53.385	18	87	0.541556	17	0.195	52	18	82	0.546264	17	0.195	85.385	48	118	0.877472
18	0.195	51.154	24	93	0.518924	18	0.195	54.269	28	94	0.5701	18	0.195	87.538	52	115	0.899597
19	0.195	44.654	19	82	0.452986	19	0.195	46.731	22	75	0.490913	19	0.195	88.962	47	157	0.914231
20	0.195	56.385	30	84	0.571989	20	0.195	46.962	24	78	0.49334	20	0.195	96.231	57	164	0.988932
21	0.195	47.808	15	100	0.484981	21	0.195	49.115	24	75	0.515957	21	0.195	87.769	61	116	0.901971
22	0.195	37.269	23	70	0.37807	22	0.195	40.846	7	84	0.429091	22	0.195	93.885	64	143	0.964823
23	0.195	40.269	11	83	0.408503	23	0.195	42.615	9	85	0.447674	23	0.195	91.038	53	126	0.935565
24	0.195	37.923	14	67	0.384704	24	0.195	46.577	24	65	0.489295	24	0.195	88.192	40	117	0.906318
25	0.195	38.577	17	58	0.391339	25	0.195	35.962	11	68	0.377784	25	0.195	94.038	49	145	0.966395
26	0.195	39.077	13	55	0.396411	26	0.195	37.192	11	63	0.390705	26	0.195	87.385	52	151	0.898025
27	0.195	39.923	20	71	0.404993	27	0.195	36.423	9	58	0.382627	27	0.195	97.231	53	135	0.999209
28	0.195	32.5	13	58	0.329692	28	0.195	31.538	5	69	0.331309	28	0.195	88.769	29	130	0.912248
29	0.195	39.308	15	64	0.398754	29	0.195	36.808	18	70	0.386671	29	0.195	90.615	52	126	0.931218
30	0.195	41.115	14	79	0.417085	30	0.195	44.154	16	77	0.463841	30	0.195	82.038	47	120	0.843076
[truncated: 3 more columns]

## Sheet: FLIP_Kap123
YYB 15641
		Nuclear						At Plasmid						Control nuclei
1	0.277	50830	40023	60182		1	0.277	55933.6	39213	65535		1	0.277	56523.3	44514	65535
2	0.277	51664.5	37510	65535		2	0.277	53324.8	38114	65535		2	0.277	52509.2	34429	65535
3	0.277	47472.6	33230	61799	1	3	0.277	54163.6	38471	65535	1	3	0.277	56211.3	45814	65535	1				1	1	1	1	1	1	1	1	1	1	1	1	1	1	1	1	1	1	1	1	1	1	1	1	1	1	1	1	1
4	0.277	38353.4	25150	49853	0.807906	4	0.277	43324.2	32453	59992	0.799877	4	0.277	54425.8	41671	64214	0.968235				0.807906	0.909175	0.939961	0.72603	0.899307	0.700497	0.68786	0.659504	0.82159	0.609481	0.597745	0.644426	0.601353	0.907927	0.915176	0.943829	0.828025	0.859683	0.756658	0.968533	0.831813	0.717945	0.784581	0.714515	0.84509	0.97209	0.885709	0.845545	0.844159
5	0.277	42932.2	27970	53442	0.904357	5	0.277	40900.7	29035	52754	0.755132	5	0.277	52297.7	40329	64216	0.930377				0.904357	0.878791	0.956821	0.798409	0.893468	0.707581	0.729966	0.814517	0.887275	0.628626	0.571714	0.692568	0.622797	0.923547	0.850717	0.929485	0.864147	0.898763	0.810516	0.981137	0.879666	0.833029	0.85405	0.760373	0.883785	0.937625	0.913677	0.90361	0.923084
6	0.277	40396.5	28301	50518	0.850943	6	0.277	47413.1	33722	60048	0.875368	6	0.277	52910.2	34757	65535	0.941274				0.850943	0.919337	0.991069	0.798409	0.911711	0.781311	0.779845	0.826169	0.892477	0.561512	0.567018	0.706365	0.596119	0.931955	0.92077	0.90906	0.876588	0.89865	0.827023	0.981886	0.861875	0.840703	0.911734	0.778992	0.936292	0.964116	0.92282	0.908048	0.886317
7	0.277	35811.2	25709	48979	0.754354	7	0.277	36498.2	20344	50443	0.67385	7	0.277	51507.2	35993	63153	0.916313				0.754354	0.831559	0.830651	0.586584	0.817951	0.575449	0.560874	0.617717	0.750923	0.369635	0.342817	0.471284	0.37235	0.860205	0.770704	0.885157	0.760515	0.771283	0.683827	0.843976	0.71998	0.67791	0.739432	0.628215	0.67697	0.897935	0.784455	0.81306	0.83465
8	0.277	39105.1	19146	58244	0.823739	8	0.277	36885	24763	44937	0.680992	8	0.277	50490.6	32968	60417	0.898228				0.823739	0.843103	0.84168	0.63054	0.747901	0.57373	0.669261	0.65318	0.743551	0.368861	0.34805	0.465932	0.377459	0.86517	0.769025	0.891352	0.806852	0.82365	0.71148	0.869094	0.767048	0.751747	0.764345	0.690889	0.781451	0.869141	0.844832	0.848812	0.814157
9	0.277	37587.6	21241	51917	0.791773	9	0.277	37998.7	20488	62375	0.701554	9	0.277	51823.9	35944	65069	0.921948				0.791773	0.786559	0.920627	0.685482	0.832055	0.563579	0.665203	0.705628	0.735964	0.369245	0.342008	0.481703	0.38639	0.867686	0.795658	0.889611	0.805647	0.826125	0.716922	0.877216	0.793428	0.764361	0.809198	0.709618	0.794193	0.906707	0.848059	0.901157	0.849758
10	0.277	31281.4	21286	39887	0.658936	10	0.277	33637.5	21256	51839	0.621035	10	0.277	51015.1	34968	63194	0.907559				0.658936	0.713603	0.742734	0.521784	0.718474	0.433361	0.505579	0.536294	0.611533	0.248747	0.245676	0.358669	0.261423	0.738679	0.741943	0.856149	0.703408	0.705967	0.595507	0.643698	0.631377	0.619264	0.693069	0.523513	0.657927	0.867367	0.779752	0.79285	0.743052
11	0.277	32409.4	21741	45717	0.682695	11	0.277	35677.7	20088	54524	0.658701	11	0.277	49932.7	37340	65535	0.888303				0.682695	0.730054	0.776875	0.534674	0.731969	0.449254	0.566117	0.590576	0.648169	0.282789	0.24299	0.344311	0.252873	0.753244	0.685432	0.858649	0.795894	0.742229	0.656684	0.665545	0.677649	0.659222	0.729538	0.602149	0.717206	0.85027	0.779885	0.757098	0.756045
12	0.277	33828.5	19188	49670	0.712589	12	0.277	36068	13908	57008	0.665908	12	0.277	51967.2	38044	64761	0.924498				0.712589	0.726229	0.788637	0.558161	0.732701	0.511108	0.620055	0.621377	0.742249	0.274662	0.233996	0.354169	0.249935	0.783624	0.68297	0.871469	0.741667	0.738175	0.66936	0.688796	0.731465	0.702677	0.767138	0.599593	0.763481	0.886593	0.799515	0.779411	0.803588
13	0.277	29288.8	18331	41950	0.616962	13	0.277	28676.3	19084	39920	0.529438	13	0.277	50155.8	35504	63508	0.892271				0.616962	0.605454	0.668647	0.431605	0.63298	0.374567	0.514881	0.509654	0.649685	0.192459	0.159802	0.252534	0.182026	0.742785	0.645479	0.810409	0.645557	0.606646	0.565899	0.535388	0.57949	0.552948	0.641725	0.464248	0.608906	0.784265	0.737528	0.707907	0.683465
14	0.277	31339.2	21141	44684	0.660154	14	0.277	31104.7	17651	45386	0.574273	14	0.277	52159.6	37732	63093	0.927919				0.660154	0.623486	0.709841	0.449411	0.656452	0.35312	0.51894	0.533129	0.725126	0.198066	0.169194	0.259007	0.174878	0.777664	0.593552	0.822469	0.671837	0.648875	0.605635	0.597761	0.670464	0.565863	0.693746	0.55182	0.669124	0.82378	0.741698	0.732212	0.69984
15	0.277	30751.3	18996	45218	0.647768	15	0.277	30859.6	16334	48633	0.569747	15	0.277	50642.5	38271	62134	0.90093				0.647768	0.558793	0.762774	0.483515	0.671532	0.408847	0.594523	0.575753	0.608281	0.247391	0.16597	0.274777	0.175516	0.769128	0.654992	0.817794	0.691338	0.615879	0.608865	0.639404	0.66985	0.650335	0.666493	0.548201	0.64988	0.808097	0.743445	0.702187	0.700261
16	0.277	26006.4	17409	36637	0.547819	16	0.277	26270.6	16721	33663	0.485024	16	0.277	48662.3	36928	62381	0.865702				0.547819	0.544932	0.610196	0.365665	0.592364	0.36844	0.467538	0.469529	0.634512	0.149515	0.11727	0.201297	0.114248	0.72875	0.5846	0.764232	0.613054	0.559571	0.498684	0.449392	0.586066	0.474172	0.581092	0.451267	0.568	0.786389	0.639639	0.668538	0.604438
17	0.277	29159.8	21460	41314	0.614243	17	0.277	27806.9	18235	44775	0.513387	17	0.277	53626.9	41176	65535	0.954024				0.614243	0.522987	0.662288	0.419855	0.582027	0.357912	0.49476	0.507326	0.637544	0.16983	0.124512	0.205797	0.12331	0.710747	0.552929	0.802369	0.654566	0.641329	0.538247	0.513631	0.591234	0.522561	0.60586	0.486806	0.572223	0.794276	0.703243	0.663743	0.682405
18	0.277	27603.9	19710	39830	0.581469	18	0.277	29675.6	19671	50623	0.547888	18	0.277	49768.5	38765	65535	0.885382				0.581469	0.527949	0.646959	0.387649	0.589445	0.37208	0.567296	0.533465	0.622371	0.183174	0.129075	0.202986	0.130076	0.733254	0.59557	0.786615	0.690223	0.603942	0.527526	0.510082	0.636373	0.528487	0.630097	0.497873	0.607094	0.837776	0.702168	0.756866	0.647646
19	0.277	27216.6	10456	46809	0.573312	19	0.277	26217.2	17557	43776	0.484037	19	0.277	52274.2	37485	61662	0.929959				0.573312	0.447487	0.623622	0.316786	0.556003	0.325546	0.407173	0.424406	0.561021	0.123018	0.0841293	0.147804	0.0910152	0.627744	0.562777	0.767275	0.626427	0.583896	0.458351	0.390102	0.509551	0.44538	0.533375	0.375187	0.505567	0.767164	0.635741	0.618297	0.561753
20	0.277	25851.4	14047	38775	0.544554	20	0.277	26709.7	14338	39323	0.49313	20	0.277	50850.7	34794	60236	0.904634				0.544554	0.472741	0.647895	0.349756	0.540312	0.328991	0.449612	0.441557	0.585736	0.127078	0.0889574	0.150622	0.0975253	0.614376	0.529206	0.741523	0.670909	0.555517	0.476048	0.428851	0.554425	0.501746	0.561086	0.409238	0.573429	0.798261	0.608715	0.623435	0.598201
21	0.277	26296.6	18553	40896	0.553932	21	0.277	26099.6	12662	37730	0.481866	21	0.277	46661.6	35469	64347	0.83011				0.553932	0.425295	0.698237	0.347858	0.602577	0.334544	0.476667	0.417581	0.637978	0.134623	0.0889574	0.154277	0.089609	0.660906	0.520816	0.740112	0.634043	0.546058	0.500126	0.432678	0.565821	0.507672	0.616582	0.423071	0.595159	0.790466	0.681863	0.652177	0.601162
22	0.277	21176.2	11315	31887	0.446071	22	0.277	20992.4	8556	33879	0.387573	22	0.277	48247.9	34817	65535	0.85833				0.446071	0.422522	0.584462	0.268283	0.51198	0.32593	0.357455	0.356309	0.523957	0.0978695	0.0634633	0.125845	0.0645886	0.578634	0.505709	0.714472	0.518525	0.489525	0.421084	0.342016	0.488957	0.371241	0.51291	0.342094	0.484644	0.765395	0.578729	0.580911	0.496881
23	0.277	20797.5	12426	29923	0.438094	23	0.277	21211.5	7637	38361	0.391618	23	0.277	48349.9	26241	62929	0.860145				0.438094	0.426985	0.612316	0.290261	0.503951	0.335124	0.445553	0.412589	0.530675	0.108318	0.0664146	0.113736	0.0684209	0.588298	0.504252	0.687961	0.581389	0.522408	0.431464	0.361345	0.538037	0.440977	0.549004	0.42062	0.528567	0.741825	0.640044	0.597147	0.54728
24	0.277	24780.8	15538	34356	0.522001	24	0.277	24289.2	13997	34586	0.44844	24	0.277	47964	33911	60239	0.853281				0.522001	0.400234	0.609159	0.302386	0.525356	0.319804	0.453499	0.388943	0.517233	0.103483	0.0711101	0.124439	0.0681649	0.597894	0.505148	0.698609	0.57582	0.525787	0.491193	0.370588	0.548466	0.435205	0.566447	0.398277	0.552841	0.747229	0.59446	0.632086	0.569254
25	0.277	20394	13737	32560	0.429595	25	0.277	21054.2	11788	33255	0.388714	25	0.277	46960.1	30410	59923	0.83542				0.429595	0.393676	0.516863	0.236452	0.465886	0.254694	0.358472	0.32351	0.50596	0.0777534	0.0579654	0.0912162	0.0634429	0.549839	0.476501	0.69274	0.512862	0.430179	0.402537	0.261345	0.458371	0.370633	0.449938	0.311662	0.472034	0.708866	0.574964	0.545391	0.466874
26	0.277	21134.3	13401	31196	0.445189	26	0.277	22816	11845	32485	0.421241	26	0.277	48197.6	37827	62446	0.857435				0.445189	0.36294	0.543679	0.249718	0.485712	0.260437	0.411059	0.363305	0.54325	0.0733093	0.0598422	0.101635	0.0663768	0.551761	0.435987	0.653413	0.514067	0.455292	0.408833	0.287396	0.471514	0.384611	0.498187	0.336561	0.498391	0.745193	0.569047	0.589436	0.547701
27	0.277	20545.6	11027	37404	0.432789	27	0.277	23170.9	16043	32637	0.427795	27	0.277	47111.1	33746	63307	0.838106				0.432789	0.359318	0.579327	0.252368	0.494954	0.289352	0.388569	0.354477	0.426839	0.0785333	0.060512	0.105014	0.0696969	0.56586	0.448636	0.693392	0.591142	0.5018	0.406448	0.284314	0.536898	0.406869	0.500828	0.318684	0.522601	0.722512	0.616378	0.626127	0.524139
28	0.277	18697.6	12078	31933	0.39386	28	0.277	20702.5	11354	29978	0.382222	28	0.277	47449.9	35244	58651	0.844134				0.39386	0.28553	0.45746	0.194388	0.456769	0.254499	0.3791	0.303195	0.442445	0.0630594	0.0554118	0.0768581	0.0633127	0.527336	0.466653	0.643849	0.450182	0.419933	0.357696	0.222224	0.395092	0.324523	0.423967	0.298466	0.402292	0.660492	0.517951	0.527515	0.486424
29	0.277	20779.7	13463	28839	0.437719	29	0.277	21060	12359	33145	0.388822	29	0.277	46143.4	27048	62113	0.820892				0.437719	0.321386	0.506163	0.217124	0.434148	0.266375	0.364054	0.301031	0.434859	0.0653743	0.050179	0.0715068	0.066507	0.505492	0.424125	0.630053	0.475346	0.451462	0.377013	0.253129	0.46319	0.369339	0.487694	0.27059	0.49812	0.723309	0.532607	0.587802	0.51495
30	0.277	20577.4	9678	29634	0.433458	30	0.277	21342.2	12162	31445	0.394033	30	0.277	45526.6	32384	60910	0.809919				0.433458	0.315089	0.505966	0.228116	0.497629	0.260821	0.395163	0.345653	0.452636	0.0686671	0.045616	0.0785473	0.073399	0.546199	0.459823	0.595609	0.478411	0.418354	0.381773	0.253314	0.485276	0.385067	0.485954	0.293043	0.473176	0.696906	0.580342	0.528686	0.532274
1	0.239	51273.2	36390	63538		1	0.239	57239.3	40740	65535		1	0.195	45678.7	30371	58715					1	1	1	1	1	1	1	1	1	1	1	1	1	1	1	1	1	1	1	1	1	1	1	1	1	1	1	1	1
2	0.239	50817.3	33884	63397		2	0.239	56596.3	45460	65535		2	0.195	42135.5	28830	54781					0.799877	0.848711	0.978392	0.71991	0.914662	0.727708	0.666296	0.759389	0.837551	0.63648	0.559504	0.761885	0.596509	0.908007	0.902798	0.95618	0.905094	0.776468	0.768933	0.966478	0.733896	0.831089	0.839388	0.751719	0.81068	0.92359	0.952022	0.981591	0.825298
3	0.239	48499.8	36683	61119	1	3	0.239	52155.7	36291	65535	1	3	0.195	43665.3	34280	56064	1				0.755132	0.946656	0.985766	0.798623	0.907106	0.856851	0.717075	0.763164	0.799628	0.604693	0.584743	0.764097	0.596271	0.910906	0.887365	0.946186	0.892458	0.818134	0.794267	0.977216	0.83224	0.781302	0.871892	0.784468	0.874729	0.910683	0.957107	0.96336	0.859962
4	0.239	44094.8	23240	53756	0.909175	4	0.239	44265.1	29259	56898	0.848711	4	0.195	44360	29770	58557	1.01591				0.875368	1.0076	0.998321	0.758979	0.915516	0.861083	0.736114	0.863784	0.855992	0.611346	0.597987	0.743821	0.599596	0.900293	0.888269	0.94607	0.8707	0.856861	0.842254	0.981792	0.821457	0.793112	0.944299	0.815737	0.873141	0.956978	0.937724	0.930329	0.869346
5	0.239	42621.1	26881	58271	0.878791	5	0.239	49373.5	36561	62391	0.946656	5	0.195	36214.6	25800	54098	0.829368				0.67385	0.665038	0.931368	0.578281	0.840424	0.683348	0.626944	0.693622	0.760052	0.35317	0.343534	0.545523	0.399334	0.809165	0.778739	0.857621	0.860062	0.728187	0.669738	0.809337	0.631167	0.705342	0.74836	0.626741	0.751054	0.879537	0.925767	0.820877	0.767919
6	0.239	44587.6	33345	60501	0.919337	6	0.239	52552	34738	65535	1.0076	6	0.195	38654.4	27950	55812	0.885243				0.680992	0.777694	0.958967	0.616201	0.793368	0.682619	0.617104	0.694829	0.735393	0.335056	0.36078	0.503503	0.375118	0.854393	0.762605	0.848788	0.864338	0.743748	0.728469	0.863678	0.730916	0.746591	0.7917	0.668957	0.793682	0.925088	0.905971	0.935975	0.771442
7	0.239	40330.4	28364	54249	0.831559	7	0.239	34685.5	24645	46187	0.665038	7	0.195	35990.6	25351	47750	0.824237				0.701554	0.818749	0.925353	0.614482	0.816165	0.680431	0.660901	0.712478	0.719646	0.317687	0.359521	0.538145	0.390192	0.852788	0.764104	0.85332	0.895973	0.781737	0.748971	0.886741	0.744586	0.725969	0.779185	0.679812	0.785391	0.924714	0.929203	0.907568	0.783063
8	0.239	40890.3	24953	54044	0.843103	8	0.239	40561.2	25792	54274	0.777694	8	0.195	42688.5	32617	52977	0.97763				0.621035	0.634934	0.900062	0.517379	0.715346	0.620166	0.538243	0.606731	0.632411	0.220108	0.228987	0.419092	0.250354	0.754873	0.711193	0.814269	0.775414	0.622546	0.600895	0.697573	0.624247	0.598308	0.648635	0.572927	0.668486	0.825198	0.838192	0.841878	0.729948
9	0.239	38147.9	27493	48164	0.786559	9	0.239	42702.4	31140	55497	0.818749	9	0.195	36606	24009	45896	0.838332				0.658701	0.703309	0.909289	0.52169	0.775811	0.572304	0.533005	0.654096	0.750521	0.237477	0.236981	0.427938	0.260444	0.760118	0.701978	0.804856	0.794509	0.658086	0.632137	0.731278	0.653957	0.609848	0.719135	0.597513	0.760587	0.844841	0.758455	0.806721	0.730803
10	0.239	34609.6	22879	47201	0.713603	10	0.239	33115.4	22454	50898	0.634934	10	0.195	39142.8	31972	58048	0.896429				0.665908	0.672325	0.912084	0.519392	0.791051	0.581934	0.606	0.668125	0.682138	0.22491	0.234694	0.425355	0.25368	0.787756	0.665601	0.800672	0.769144	0.694238	0.671171	0.732588	0.672015	0.625931	0.706242	0.648635	0.781729	0.862515	0.789527	0.826983	0.733046
11	0.239	35407.4	27911	43579	0.730054	11	0.239	36681.6	19083	53721	0.703309	11	0.195	40435.6	28604	55120	0.926034				0.529438	0.546464	0.873448	0.396439	0.677069	0.438641	0.458584	0.55046	0.714878	0.159858	0.153149	0.280498	0.176518	0.707551	0.659887	0.770105	0.657894	0.596075	0.559625	0.575165	0.585593	0.544791	0.675338	0.484414	0.599807	0.809766	0.735223	0.743434	0.676409
12	0.239	35221.9	22216	48166	0.726229	12	0.239	35065.6	21274	61730	0.672325	12	0.195	42022.7	30786	52364	0.962383				0.574273	0.628461	0.827521	0.462512	0.667561	0.432365	0.528721	0.588779	0.619562	0.17372	0.153268	0.326578	0.175453	0.756414	0.627417	0.685608	0.640128	0.611886	0.611369	0.615686	0.626347	0.567962	0.658554	0.51039	0.63995	0.826229	0.773853	0.761476	0.680141
13	0.239	29364.4	21678	41729	0.605454	13	0.239	28501.2	15028	40643	0.546464	13	0.195	41180.1	31440	61508	0.943085				0.569747	0.60909	0.875536	0.445565	0.673169	0.476431	0.546018	0.600089	0.602985	0.175571	0.162289	0.332107	0.181741	0.781217	0.647563	0.68898	0.584077	0.643504	0.615489	0.61242	0.623982	0.586498	0.693654	0.541567	0.686037	0.838013	0.786637	0.754165	0.688675
14	0.239	30238.9	20887	42332	0.623486	14	0.239	32777.8	20655	46613	0.628461	14	0.195	40155.2	28945	53325	0.919612				0.485024	0.483957	0.791851	0.35019	0.591246	0.435282	0.436848	0.557551	0.580815	0.107189	0.112379	0.225208	0.118471	0.678492	0.568897	0.608086	0.554436	0.540806	0.481467	0.48422	0.517489	0.504086	0.589427	0.415011	0.581425	0.747572	0.719548	0.793303	0.610179
15	0.239	27101.3	15772	42360	0.558793	15	0.239	31767.5	23075	54908	0.60909	15	0.195	38146.4	21360	49171	0.873608				0.513387	0.510244	0.787684	0.37633	0.619286	0.425652	0.498255	0.54639	0.607128	0.123079	0.109523	0.263177	0.129155	0.687747	0.539333	0.654229	0.584457	0.568869	0.516024	0.544353	0.543783	0.503908	0.621169	0.486267	0.620812	0.804061	0.694807	0.697168	0.624999
16	0.239	26429.1	12313	38453	0.544932	16	0.239	25241.1	7591	33956	0.483957	16	0.195	41324.5	28979	56572	0.946393				0.547888	0.437706	0.796078	0.381785	0.630013	0.420254	0.487146	0.544425	0.585993	0.112547	0.104499	0.240689	0.133667	0.686265	0.553363	0.646325	0.626639	0.569119	0.533928	0.517553	0.552545	0.5	0.586068	0.485528	0.647344	0.821268	0.737009	0.717065	0.622655
17	0.239	25364.8	16810	35068	0.522987	17	0.239	26612.1	17708	34578	0.510244	17	0.195	40650	30440	59368	0.930946				0.484037	0.396124	0.744648	0.307958	0.55187	0.364514	0.40828	0.432795	0.571075	0.0833501	0.0788016	0.176554	0.0936613	0.615929	0.526709	0.576359	0.613911	0.478555	0.472962	0.402333	0.472699	0.457204	0.482147	0.385509	0.535617	0.732699	0.713777	0.655721	0.564528
18	0.239	25605.4	13901	40652	0.527949	18	0.239	22828.8	13646	32806	0.437706	18	0.195	38399.5	26826	53377	0.879404				0.49313	0.467372	0.700429	0.323761	0.587955	0.392238	0.442717	0.405342	0.604229	0.091665	0.0799477	0.171396	0.0821464	0.626725	0.521096	0.588447	0.657137	0.498039	0.474754	0.448741	0.496098	0.446483	0.544482	0.40555	0.573828	0.763004	0.632663	0.654611	0.566018
19	0.239	21703	12672	28413	0.447487	19	0.239	20660.1	13643	30862	0.396124	19	0.195	39727.9	22847	56814	0.909828				0.481866	0.450532	0.772637	0.29848	0.566742	0.378519	0.453664	0.463269	0.60174	0.0951778	0.0728628	0.17398	0.0580469	0.632957	0.504561	0.619594	0.64583	0.516788	0.502686	0.417369	0.546326	0.46538	0.573859	0.431526	0.571064	0.720351	0.610808	0.699855	0.604204
20	0.239	22927.8	11460	30944	0.472741	20	0.239	24376.1	7559	37895	0.467372	20	0.195	37387.8	23615	45004	0.856237				0.387573	0.370402	0.675756	0.245332	0.555895	0.326133	0.3656	0.437323	0.498548	0.076697	0.0603023	0.144123	0.0481949	0.577431	0.457964	0.540098	0.543417	0.448162	0.416116	0.320729	0.443509	0.443395	0.5161	0.361849	0.477233	0.672281	0.588262	0.614546	0.490506
21	0.239	20626.7	12725	29333	0.425295	21	0.239	23497.8	16004	34269	0.450532	21	0.195	37309.2	29993	51424	0.854436				0.391618	0.415678	0.67755	0.253666	0.532609	0.301619	0.38813	0.427967	0.524246	0.0750352	0.0608724	0.135277	0.0510443	0.593719	0.445636	0.554857	0.569923	0.495219	0.441003	0.337722	0.473136	0.477923	0.515184	0.363146	0.476473	0.779087	0.615621	0.646095	0.545755
22	0.239	20492.2	8048	32782	0.422522	22	0.239	19318.6	8966	34862	0.370402	22	0.195	39932.2	22137	51079	0.914507				0.44844	0.384371	0.679279	0.264867	0.559915	0.326862	0.443192	0.420881	0.534192	0.0663477	0.0581287	0.136383	0.0580469	0.585141	0.421085	0.527778	0.54465	0.533579	0.468488	0.369655	0.492682	0.439034	0.532578	0.421322	0.50266	0.692761	0.61328	0.647671	0.54597
23	0.239	20708.7	12116	31332	0.426985	23	0.239	21680	10845	32763	0.415678	23	0.195	38938.7	31689	51307	0.891753				0.388714	0.369073	0.631745	0.221776	0.536265	0.28411	0.399713	0.34711	0.477828	0.0585828	0.0449981	0.105049	0.0529453	0.545656	0.394528	0.442817	0.569258	0.397795	0.393821	0.28422	0.376544	0.372344	0.513736	0.309612	0.435706	0.688739	0.597333	0.560419	0.467791
24	0.239	19411.2	12260	30022	0.400234	24	0.239	20047.2	13029	35609	0.384371	24	0.195	41032.6	25559	60824	0.939707				0.421241	0.361021	0.582218	0.22235	0.533098	0.266304	0.36512	0.37004	0.428306	0.0700439	0.04694	0.11095	0.0586402	0.562684	0.389316	0.502092	0.534296	0.459189	0.431511	0.300933	0.460689	0.39206	0.494125	0.326127	0.471219	0.694726	0.546878	0.558476	0.519625
25	0.239	19093.2	10156	31130	0.393676	25	0.239	19249.3	10359	31738	0.369073	25	0.195	36505.7	26061	45730	0.836034				0.427795	0.387521	0.601229	0.214017	0.529194	0.27579	0.40384	0.336403	0.39764	0.0733675	0.0443151	0.107633	0.0585232	0.547691	0.417677	0.484775	0.590063	0.45821	0.430976	0.293745	0.46411	0.425403	0.472076	0.348861	0.483314	0.707915	0.570251	0.597059	0.484214
26	0.239	17602.5	6788	25712	0.36294	26	0.239	18829.3	11514	28222	0.361021	26	0.195	37085.2	23323	48791	0.849306				0.382222	0.316136	0.551771	0.179259	0.457758	0.270392	0.288795	0.327198	0.425407	0.056921	0.0414586	0.103572	0.0568603	0.510117	0.420887	0.451998	0.54883	0.407843	0.373948	0.235294	0.380053	0.348262	0.453302	0.261274	0.380639	0.645157	0.524196	0.574947	0.467898
27	0.239	17426.8	8476	27690	0.359318	27	0.239	20211.4	7753	36293	0.387521	27	0.195	39068.9	22326	53086	0.894736				0.388822	0.305468	0.548123	0.186728	0.44447	0.305414	0.354491	0.373965	0.422089	0.0576602	0.0411141	0.08994	0.0551975	0.50222	0.385912	0.447697	0.490881	0.413846	0.380126	0.256024	0.403805	0.361618	0.46719	0.306365	0.432527	0.653761	0.522137	0.539879	0.493711
28	0.239	13848.2	6667	24127	0.28553	28	0.239	16488.3	9403	27648	0.316136	28	0.195	36928.7	20795	51687	0.845721				0.394033	0.324302	0.505272	0.188167	0.443376	0.274624	0.379406	0.338663	0.447577	0.0609838	0.0396294	0.0943632	0.0751438	0.52073	0.44273	0.44212	0.506176	0.391174	0.405101	0.25042	0.424401	0.361532	0.480773	0.301912	0.426588	0.710624	0.568188	0.572355	0.515146
29	0.239	15587.2	6642	25618	0.321386	29	0.239	15931.9	8116	24874	0.305468	29	0.195	40105.6	26519	50472	0.918478
30	0.239	15281.8	5494	26081	0.315089	30	0.239	16914.2	8402	31955	0.324302	30	0.195	40183.8	30230	55415	0.920269
																					1	1	1	1	1	1	1	1	1	1	1	1	1	1	1	1	1	1	1	1	1	1	1	1	1	1	1	1	1
																					0.968235	1.01591	1.00607	1.00755	0.962957	0.949327	0.924649	1.01327	0.959604	0.924461	1.00893	1.03899	0.958568	0.99871	0.99852	0.945464	0.953079	0.996865	0.987283	1.00563	0.977544	0.97803	0.978666	0.984005	1.0436	0.935251	0.93679	1.00856	1.0091
1	0.269	64842.7	58515	65535		1	0.269	65461.4	64247	65535		1	0.269	51416.2	36060	63462					0.930377	0.829368	1.00609	0.981118	0.977118	0.904448	0.975134	0.975406	0.984727	0.927217	1.04109	1.05643	0.969009	1.01312	0.962749	0.954148	0.912063	0.995606	0.974402	1.00809	0.970608	0.986123	0.953257	0.976722	1.0367	0.942224	0.935873	0.954439	0.987586
2	0.269	64794.4	59567	65535		2	0.269	65242.6	59819	65535		2	0.269	50932.1	37497	65535					0.941274	0.885243	0.955231	1.04003	1.0151	0.871356	0.968768	0.979476	1.05172	0.930697	1.06162	1.01554	1.02055	0.973856	0.930913	0.93504	0.972235	0.97	0.987928	1.00405	1.00256	0.9768	0.943946	0.920597	1.03237	0.973479	0.937092	1.00081	0.962759
3	0.269	64105.9	47936	65535	1	3	0.269	65260.4	59107	65535	1	3	0.269	47767.5	30592	61548	1				0.916313	0.824237	0.960133	1.01624	0.9242	0.934644	0.988175	0.99328	1.09754	0.883864	0.960875	0.969195	0.966192	0.98121	0.942236	0.940018	0.938396	0.95594	0.994006	0.998914	0.978122	0.985584	0.991055	0.964605	1.01526	0.944594	0.950496	0.965957	1.06482
4	0.269	60257.1	49866	65535	0.939961	4	0.269	63850.2	49732	65535	0.978392	4	0.269	48057.3	27776	64172	1.00607				0.898228	0.97763	1.03557	0.974695	0.981479	0.918098	0.994541	0.973282	1.0298	0.892855	1.0066	0.984192	0.946138	0.972161	0.947322	0.950211	0.912864	0.942633	0.983555	0.986867	1.00182	0.981884	0.981605	0.930627	0.987379	1.00723	0.905711	0.992911	0.975033
5	0.269	61337.9	44848	65535	0.956821	5	0.269	64331.5	49554	65535	0.985766	5	0.269	48058.4	29780	62025	1.00609				0.921948	0.838332	0.952738	0.950526	0.983654	0.903	0.946026	0.961427	0.966008	0.890243	1.02822	0.976281	0.994365	0.972758	0.963568	0.952756	0.985001	0.953929	0.986715	1.00879	0.97531	0.966315	0.97466	0.982302	0.967051	0.956424	0.927041	0.955843	0.893513
6	0.269	63533.4	55637	65535	0.991069	6	0.269	65150.9	61865	65535	0.998321	6	0.269	45629	32493	59776	0.955231				0.907559	0.896429	0.91949	0.981873	1.0084	0.860189	0.888871	0.98036	1.05936	0.847182	0.969272	0.986646	0.941331	1.03211	0.96193	0.934115	0.953402	0.963344	0.966707	0.951618	1.03558	0.975643	0.994848	0.972932	0.997947	0.967502	0.972582	0.956211	0.935031
7	0.269	53249.7	34283	65311	0.830651	7	0.269	60781.4	48492	65535	0.931368	7	0.269	45863.2	34099	59566	0.960133				0.888303	0.926034	0.933334	1.00076	1.03922	0.891003	0.938753	0.999643	1.05641	0.895463	0.977493	0.940844	0.931386	0.988269	0.950112	0.952178	1.00431	0.903594	1.00697	0.97324	1.0289	0.955525	0.989622	0.941794	1.03383	0.945714	0.895962	0.965957	0.97269
8	0.269	53956.6	35993	65535	0.84168	8	0.269	62582.6	52374	65535	0.958967	8	0.269	49466.6	38940	57782	1.03557				0.924498	0.962383	0.923367	0.970924	0.98241	0.91892	0.931624	0.973464	1.12783	0.859505	0.969987	0.970013	0.940334	1.00447	0.957007	0.957854	0.893076	0.907481	0.983475	1.00227	1.03757	0.971633	0.980815	0.937064	1.01805	0.957045	0.850723	0.946242	1.02165
9	0.269	59017.6	38388	65535	0.920627	9	0.269	60388.9	45140	65535	0.925353	9	0.269	45509.9	33097	59651	0.952738				0.892271	0.943085	0.958251	1.00076	1.01914	0.876524	0.899789	0.968504	1.09606	0.836019	0.939259	0.977099	0.904537	0.955361	0.891857	1.00012	0.901853	0.918155	0.975291	0.959024	0.988936	0.989671	0.956404	0.968202	1.04521	0.895035	0.928103	0.988406	0.964136
10	0.269	47613.7	28814	60625	0.742734	10	0.269	58738.4	39435	65535	0.900062	10	0.269	43921.8	32369	61029	0.91949				0.927919	0.919612	0.976091	0.961861	1.01183	0.962153	0.929351	0.987969	1.0101	0.832683	0.948195	0.926665	0.897082	0.981107	0.996715	0.983209	0.920363	0.962842	0.94038	0.963271	0.990998	0.991134	0.968861	1.00029	0.996773	0.956916	1.05118	0.909325	0.93131
11	0.269	49802.3	37795	60859	0.776875	11	0.269	59340.6	38679	65535	0.909289	11	0.269	44583.1	30585	60774	0.933334				0.90093	0.873608	0.919964	0.965631	0.880775	0.958012	0.908278	0.991507	0.937933	0.861389	0.93676	0.928844	0.837421	0.981807	0.957497	0.962601	0.822216	0.931207	0.940949	0.994866	0.999834	0.975872	0.989765	0.945677	0.991414	0.945714	1.01645	0.948165	0.988136
12	0.269	50556.3	32254	65535	0.788637	12	0.269	59523	41193	65535	0.912084	12	0.269	44106.9	30823	60141	0.923367				0.865702	0.946393	0.85683	0.975456	0.898519	0.936712	0.898423	0.985314	1.04483	0.853269	0.944442	0.89995	0.899403	0.960924	0.941745	0.964568	0.871848	0.885265	0.916889	0.94293	0.977955	0.983348	0.971726	0.91009	0.981729	1.04657	0.908304	0.979913	0.951173
13	0.269	42864.2	30307	55350	0.668647	13	0.269	57001.6	36915	65535	0.873448	13	0.269	45773.2	32674	58000	0.958251				0.954024	0.930946	0.938309	0.90974	0.824746	0.809516	0.924196	0.949401	0.990394	0.82326	0.920328	0.904857	0.89178	0.953474	0.930751	0.94025	0.863871	0.922047	0.926446	0.954977	0.97655	0.964697	0.985038	0.941892	0.922943	0.974599	0.951257	0.958869	0.917242
14	0.269	45505	29340	65458	0.709841	14	0.269	54004.4	42918	65535	0.827521	14	0.269	46625.4	32845	61489	0.976091				0.885382	0.879404	1.00978	0.923716	0.837197	0.906516	0.92283	0.898797	1.0532	0.852402	0.939445	0.873228	0.892771	0.937462	0.957826	0.966192	0.875998	0.921917	0.936412	0.948263	0.971348	0.98813	0.990338	0.987416	0.949659	0.970863	0.928103	0.93864	1.00275
15	0.269	48898.3	37091	65535	0.762774	15	0.269	57137.9	39828	65535	0.875536	15	0.269	43944.4	28528	55675	0.919964				0.929959	0.909828	0.913454	0.930888	0.780855	0.92885	0.842026	0.949401	1.0399	0.876468	0.895852	0.931029	0.891278	0.941242	0.904823	0.96677	0.89052	0.955815	0.923207	0.959024	0.969369	0.996607	0.956191	0.939432	0.963157	1.00561	0.939529	0.931108	0.884966
16	0.269	39117.2	23390	48561	0.610196	16	0.269	51676.5	34048	63031	0.791851	16	0.269	40928.6	28608	58811	0.85683				0.904634	0.856237	0.926534	0.89577	0.658678	0.959875	0.85749	0.961076	0.994333	0.85095	0.915684	0.855784	0.913158	0.92593	0.904495	0.954148	0.890042	0.920036	0.927988	0.98578	0.96334	0.997531	0.990694	0.976815	0.948555	0.953555	0.89642	0.961678	0.820964
17	0.269	42456.6	27255	57989	0.662288	17	0.269	51404.6	29316	65535	0.787684	17	0.269	44820.7	33131	65535	0.938309				0.83011	0.854436	0.893176	0.85536	0.699144	0.997933	0.90934	0.954174	1.04902	0.875888	0.892099	0.854416	0.919125	0.955758	0.888905	0.992708	0.857965	0.972132	0.922638	0.951423	0.980928	0.979342	0.93264	0.959211	0.936888	0.951315	0.930238	0.969502	0.902756
18	0.269	41473.9	23339	52708	0.646959	18	0.269	51952.4	41276	65535	0.796078	18	0.269	48234.8	35623	57746	1.00978				0.85833	0.914507	0.924521	0.816846	0.656498	0.863494	0.864613	0.939312	0.967487	0.837467	0.867631	0.840244	0.867083	0.977732	0.906299	0.937473	0.908075	0.950668	0.918022	0.949544	0.977622	0.985355	0.940726	0.947473	0.941068	0.991408	0.928864	0.951709	0.929927
19	0.269	39977.9	25495	53692	0.623622	19	0.269	48596	32813	65535	0.744648	19	0.269	43633.4	29089	61251	0.913454				0.860145	0.891753	0.980812	0.820616	0.664123	0.889555	0.881593	0.901452	0.998277	0.847182	0.874059	0.879502	0.769805	0.975639	0.940103	0.942683	0.885092	0.933469	0.90263	0.949843	0.983568	0.941958	0.989261	0.955234	0.926611	0.992405	0.881037	0.932881	0.906893
20	0.269	41533.9	29427	52220	0.647895	20	0.269	45710.3	27470	60938	0.700429	20	0.269	44258.2	29277	63432	0.926534				0.853281	0.939707	0.901503	0.829305	0.611205	0.926782	0.893876	0.968504	0.990394	0.856461	0.925688	0.856602	0.767483	0.930108	0.933212	0.948009	0.862431	0.962466	0.904172	0.95863	0.98398	0.949206	0.971869	0.91009	0.90834	0.963268	0.925364	0.93561	0.856272
21	0.269	44761.1	31044	59015	0.698237	21	0.269	50422.6	31513	65535	0.772637	21	0.269	42664.8	30780	60418	0.893176				0.83542	0.836034	0.971432	0.841764	0.596732	0.935467	0.922227	0.943207	1.00961	0.841526	0.850122	0.823886	0.698542	1.00328	0.949131	0.988308	0.891959	0.910245	0.923611	0.934242	0.950709	0.92986	0.96163	0.972273	0.933731	0.937245	0.924755	0.883629	0.783173
22	0.269	37467.5	26818	55690	0.584462	22	0.269	44100.1	31333	60003	0.675756	22	0.269	44162.1	29513	63023	0.924521				0.857435	0.849306	0.911102	0.893885	0.645602	0.991519	0.850665	0.989209	0.952464	0.82326	0.83708	0.852512	0.60109	0.993243	0.952245	0.93145	0.866743	0.93874	0.932684	0.936117	0.992982	0.938954	0.918463	1.00341	0.906724	0.921679	0.948361	0.956654	0.769375
23	0.269	39253.1	25592	56517	0.612316	23	0.269	44217.2	25706	62899	0.67755	23	0.269	46850.9	31623	60637	0.980812				0.838106	0.894736	0.979838	0.902568	0.669727	0.866595	0.899789	0.923391	0.946796	0.816588	0.848877	0.864506	0.6228	1.01323	0.943879	0.943377	0.959307	0.922925	0.927339	0.932169	1.00553	0.953828	0.924905	0.990256	0.968883	0.950072	0.834882	0.927635	0.805789
24	0.269	39050.7	26122	52052	0.609159	24	0.269	44330.1	24441	65535	0.679279	24	0.269	43062.5	30818	58977	0.901503				0.844134	0.845721	0.941134	0.89426	0.653227	0.890384	0.809887	0.921619	0.957632	0.819488	0.85459	0.788442	0.557342	1.0004	0.934689	0.965378	0.868814	0.945898	0.949533	0.95705	0.964001	0.930706	0.949889	1.00218	0.92375	0.963145	0.905711	0.915305	0.778207
25	0.269	33134	24108	44204	0.516863	25	0.269	41227.9	20906	52929	0.631745	25	0.269	46402.9	32068	57928	0.971432				0.820892	0.918478	0.933535	0.856495	0.637817	0.888936	0.842479	0.898089	0.996548	0.807165	0.832974	0.77181	0.530656	0.989463	0.892514	0.965378	0.899297	0.906227	0.934062	0.971166	0.979522	0.93718	0.944593	0.970757	0.914136	0.97423	0.923229	0.906813	0.760272
26	0.269	34853	24219	46396	0.543679	26	0.269	37995.8	19976	54071	0.582218	26	0.269	43521.1	27710	56292	0.911102				0.809919	0.920269	0.953624	0.923716	0.681401	0.921614	0.82368	0.94126	0.951477	0.847618	0.861018	0.800436	0.55999	0.983096	0.896619	0.982515	0.954041	0.87723	0.929121	0.962379	0.988358	0.922997	0.972225	0.969526	0.949217	0.878226	0.951106	0.946685	0.79517
27	0.269	37138.3	23548	48488	0.579327	27	0.269	39236.4	27717	53111	0.601229	27	0.269	46804.4	31716	60442	0.979838
28	0.269	29325.9	16369	42003	0.45746	28	0.269	36008.8	22254	50961	0.551771	28	0.269	44955.6	31101	57893	0.941134
29	0.269	32448	22998	44429	0.506163	29	0.269	35770.7	20787	50257	0.548123	29	0.269	44592.6	30727	58323	0.933535
30	0.269	32435.4	17928	47426	0.505966	30	0.269	32974.3	17591	51109	0.505272	30	0.269	45552.2	32317	58718	0.953624
1	0.479	168.812	148	190		1	0.479	214.875	170	255		1	0.479	173	153	197
2	0.479	164.625	148	190		2	0.479	207.25	175	247		2	0.479	169.875	145	191
3	0.479	164.938	145	194	1	3	0.479	217.562	179	255	1	3	0.479	165.5	139	190	1
4	0.479	119.75	105	131	0.72603	4	0.479	156.625	130	196	0.71991	4	0.479	166.75	144	191	1.00755
5	0.479	131.688	117	151	0.798409	5	0.479	173.75	133	220	0.798623	5	0.479	162.375	140	187	0.981118
6	0.479	131.688	120	157	0.798409	6	0.479	165.125	119	217	0.758979	6	0.479	172.125	144	197	1.04003
7	0.479	96.75	79	112	0.586584	7	0.479	125.812	93	174	0.578281	7	0.479	168.188	153	185	1.01624
8	0.479	104	94	121	0.63054	8	0.479	134.062	91	172	0.616201	8	0.479	161.312	148	180	0.974695
9	0.479	113.062	101	123	0.685482	9	0.479	133.688	91	161	0.614482	9	0.479	157.312	140	173	0.950526
10	0.479	86.062	71	99	0.521784	10	0.479	112.562	94	136	0.517379	10	0.479	162.5	148	188	0.981873
11	0.479	88.188	75	101	0.534674	11	0.479	113.5	86	137	0.52169	11	0.479	165.625	151	186	1.00076
12	0.479	92.062	82	99	0.558161	12	0.479	113	93	148	0.519392	12	0.479	160.688	135	184	0.970924
13	0.479	71.188	60	84	0.431605	13	0.479	86.25	74	103	0.396439	13	0.479	165.625	150	186	1.00076
14	0.479	74.125	64	93	0.449411	14	0.479	100.625	80	131	0.462512	14	0.479	159.188	138	178	0.961861
15	0.479	79.75	71	88	0.483515	15	0.479	96.938	79	121	0.445565	15	0.479	159.812	140	186	0.965631
16	0.479	60.312	52	68	0.365665	16	0.479	76.188	64	99	0.35019	16	0.479	161.438	140	182	0.975456
17	0.479	69.25	61	79	0.419855	17	0.479	81.875	58	99	0.37633	17	0.479	150.562	128	176	0.90974
18	0.479	63.938	55	83	0.387649	18	0.479	83.062	70	106	0.381785	18	0.479	152.875	131	169	0.923716
19	0.479	52.25	41	62	0.316786	19	0.479	67	48	81	0.307958	19	0.479	154.062	143	180	0.930888
20	0.479	57.688	49	67	0.349756	20	0.479	70.438	56	93	0.323761	20	0.479	148.25	131	178	0.89577
21	0.479	57.375	51	65	0.347858	21	0.479	64.938	53	78	0.29848	21	0.479	141.562	127	173	0.85536
22	0.479	44.25	35	53	0.268283	22	0.479	53.375	46	65	0.245332	22	0.479	135.188	117	150	0.816846
23	0.479	47.875	38	55	0.290261	23	0.479	55.188	45	78	0.253666	23	0.479	135.812	112	163	0.820616
24	0.479	49.875	40	59	0.302386	24	0.479	57.625	45	72	0.264867	24	0.479	137.25	116	161	0.829305
25	0.479	39	31	47	0.236452	25	0.479	48.25	36	62	0.221776	25	0.479	139.312	116	158	0.841764
26	0.479	41.188	32	51	0.249718	26	0.479	48.375	42	62	0.22235	26	0.479	147.938	125	179	0.893885
27	0.479	41.625	33	48	0.252368	27	0.479	46.562	34	61	0.214017	27	0.479	149.375	105	178	0.902568
28	0.479	32.062	25	40	0.194388	28	0.479	39	31	51	0.179259	28	0.479	148	125	176	0.89426
29	0.479	35.812	27	45	0.217124	29	0.479	40.625	26	54	0.186728	29	0.479	141.75	127	159	0.856495
30	0.479	37.625	32	45	0.228116	30	0.479	40.938	27	57	0.188167	30	0.479	152.875	132	175	0.923716
1	0.254	250.059	234	255		1	0.254	251.824	225	255		1	0.254	206.618	160	253
2	0.254	247.147	226	255		2	0.254	243.147	189	255		2	0.254	190.382	130	243
3	0.254	241.853	199	255	1	3	0.254	241.265	192	255	1	3	0.254	188.971	101	244	1
4	0.254	217.5	163	255	0.899307	4	0.254	220.676	168	255	0.914662	4	0.254	181.971	121	231	0.962957
5	0.254	216.088	166	255	0.893468	5	0.254	218.853	170	255	0.907106	5	0.254	184.647	119	242	0.977118
6	0.254	220.5	164	255	0.911711	6	0.254	220.882	148	255	0.915516	6	0.254	191.824	127	244	1.0151
7	0.254	197.824	154	234	0.817951	7	0.254	202.765	142	252	0.840424	7	0.254	174.647	128	252	0.9242
8	0.254	180.882	125	240	0.747901	8	0.254	191.412	150	235	0.793368	8	0.254	185.471	137	238	0.981479
9	0.254	201.235	146	240	0.832055	9	0.254	196.912	161	247	0.816165	9	0.254	185.882	112	244	0.983654
10	0.254	173.765	130	224	0.718474	10	0.254	172.588	118	243	0.715346	10	0.254	190.559	149	244	1.0084
11	0.254	177.029	132	226	0.731969	11	0.254	187.176	123	243	0.775811	11	0.254	196.382	145	255	1.03922
12	0.254	177.206	138	234	0.732701	12	0.254	190.853	147	252	0.791051	12	0.254	185.647	117	239	0.98241
13	0.254	153.088	103	192	0.63298	13	0.254	163.353	115	205	0.677069	13	0.254	192.588	132	253	1.01914
14	0.254	158.765	115	214	0.656452	14	0.254	161.059	110	229	0.667561	14	0.254	191.206	124	243	1.01183
15	0.254	162.412	112	205	0.671532	15	0.254	162.412	104	236	0.673169	15	0.254	166.441	92	241	0.880775
16	0.254	143.265	96	211	0.592364	16	0.254	142.647	79	229	0.591246	16	0.254	169.794	89	241	0.898519
17	0.254	140.765	98	208	0.582027	17	0.254	149.412	96	207	0.619286	17	0.254	155.853	73	242	0.824746
18	0.254	142.559	83	192	0.589445	18	0.254	152	88	223	0.630013	18	0.254	158.206	89	238	0.837197
19	0.254	134.471	84	200	0.556003	19	0.254	133.147	93	194	0.55187	19	0.254	147.559	65	230	0.780855
20	0.254	130.676	80	197	0.540312	20	0.254	141.853	89	189	0.587955	20	0.254	124.471	66	183	0.658678
21	0.254	145.735	97	206	0.602577	21	0.254	136.735	81	198	0.566742	21	0.254	132.118	77	208	0.699144
22	0.254	123.824	76	171	0.51198	22	0.254	134.118	69	182	0.555895	22	0.254	124.059	68	206	0.656498
23	0.254	121.882	87	192	0.503951	23	0.254	128.5	89	166	0.532609	23	0.254	125.5	74	231	0.664123
24	0.254	127.059	77	171	0.525356	24	0.254	135.088	82	207	0.559915	24	0.254	115.5	49	205	0.611205
25	0.254	112.676	78	158	0.465886	25	0.254	129.382	77	186	0.536265	25	0.254	112.765	48	189	0.596732
26	0.254	117.471	76	168	0.485712	26	0.254	128.618	99	175	0.533098	26	0.254	122	57	208	0.645602
27	0.254	119.706	88	170	0.494954	27	0.254	127.676	83	187	0.529194	27	0.254	126.559	72	198	0.669727
28	0.254	110.471	73	165	0.456769	28	0.254	110.441	71	158	0.457758	28	0.254	123.441	66	229	0.653227
29	0.254	105	63	152	0.434148	29	0.254	107.235	64	172	0.44447	29	0.254	120.529	53	201	0.637817
30	0.254	120.353	77	160	0.497629	30	0.254	106.971	63	147	0.443376	30	0.254	128.765	65	252	0.681401
1	0.254	163.971	95	210		1	0.254	221.824	117	255		1	0.254	153.265	110	191
2	0.254	157.765	94	218		2	0.254	214.029	136	255		2	0.254	144.118	100	184
3	0.254	153.588	91	207	1	3	0.254	201.559	99	255	1	3	0.254	142.206	103	185	1
4	0.254	107.588	73	150	0.700497	4	0.254	146.676	94	219	0.727708	4	0.254	135	96	180	0.949327
5	0.254	108.676	65	160	0.707581	5	0.254	172.706	89	246	0.856851	5	0.254	128.618	86	181	0.904448
6	0.254	120	74	177	0.781311	6	0.254	173.559	93	255	0.861083	6	0.254	123.912	84	168	0.871356
7	0.254	88.382	64	141	0.575449	7	0.254	137.735	87	222	0.683348	7	0.254	132.912	77	193	0.934644
8	0.254	88.118	51	120	0.57373	8	0.254	137.588	69	212	0.682619	8	0.254	130.559	80	190	0.918098
9	0.254	86.559	43	131	0.563579	9	0.254	137.147	76	203	0.680431	9	0.254	128.412	76	170	0.903
10	0.254	66.559	28	107	0.433361	10	0.254	125	72	198	0.620166	10	0.254	122.324	86	175	0.860189
11	0.254	69	41	106	0.449254	11	0.254	115.353	57	194	0.572304	11	0.254	126.706	96	173	0.891003
12	0.254	78.5	44	110	0.511108	12	0.254	117.294	71	197	0.581934	12	0.254	130.676	92	204	0.91892
13	0.254	57.529	24	82	0.374567	13	0.254	88.412	51	137	0.438641	13	0.254	124.647	74	168	0.876524
14	0.254	54.235	24	82	0.35312	14	0.254	87.147	40	152	0.432365	14	0.254	136.824	92	200	0.962153
15	0.254	62.794	37	102	0.408847	15	0.254	96.029	47	155	0.476431	15	0.254	136.235	83	203	0.958012
16	0.254	56.588	31	86	0.36844	16	0.254	87.735	49	135	0.435282	16	0.254	133.206	96	183	0.936712
17	0.254	54.971	22	85	0.357912	17	0.254	85.794	45	148	0.425652	17	0.254	115.118	75	161	0.809516
18	0.254	57.147	24	97	0.37208	18	0.254	84.706	54	147	0.420254	18	0.254	128.912	95	182	0.906516
19	0.254	50	23	83	0.325546	19	0.254	73.471	40	124	0.364514	19	0.254	132.088	62	169	0.92885
20	0.254	50.529	26	74	0.328991	20	0.254	79.059	38	138	0.392238	20	0.254	136.5	74	186	0.959875
21	0.254	51.382	24	99	0.334544	21	0.254	76.294	30	137	0.378519	21	0.254	141.912	92	209	0.997933
22	0.254	50.059	27	94	0.32593	22	0.254	65.735	25	145	0.326133	22	0.254	122.794	88	181	0.863494
23	0.254	51.471	22	90	0.335124	23	0.254	60.794	24	114	0.301619	23	0.254	126.5	100	181	0.889555
24	0.254	49.118	19	92	0.319804	24	0.254	65.882	23	126	0.326862	24	0.254	131.794	78	181	0.926782
25	0.254	39.118	16	59	0.254694	25	0.254	57.265	29	93	0.28411	25	0.254	133.029	77	177	0.935467
26	0.254	40	17	80	0.260437	26	0.254	53.676	22	75	0.266304	26	0.254	141	67	201	0.991519
27	0.254	44.441	10	79	0.289352	27	0.254	55.588	13	96	0.27579	27	0.254	123.235	64	200	0.866595
28	0.254	39.088	12	58	0.254499	28	0.254	54.5	27	98	0.270392	28	0.254	126.618	97	183	0.890384
29	0.254	40.912	25	76	0.266375	29	0.254	61.559	19	92	0.305414	29	0.254	126.412	86	187	0.888936
30	0.254	40.059	20	67	0.260821	30	0.254	55.353	22	92	0.274624	30	0.254	131.059	79	216	0.921614
1	0.254	193.235	153	236		1	0.254	191.559	148	254		1	0.254	192.618	146	241
2	0.254	191.912	124	243		2	0.254	184.676	117	255		2	0.254	171.265	133	219
3	0.254	173.941	130	240	1	3	0.254	185.353	94	247	1	3	0.254	194	141	255	1
4	0.254	119.647	75	189	0.68786	4	0.254	123.5	71	151	0.666296	4	0.254	179.382	128	248	0.924649
5	0.254	126.971	88	171	0.729966	5	0.254	132.912	98	190	0.717075	5	0.254	189.176	158	232	0.975134
6	0.254	135.647	88	182	0.779845	6	0.254	136.441	86	183	0.736114	6	0.254	187.941	134	239	0.968768
7	0.254	97.559	55	147	0.560874	7	0.254	116.206	52	216	0.626944	7	0.254	191.706	141	255	0.988175
8	0.254	116.412	82	164	0.669261	8	0.254	114.382	76	166	0.617104	8	0.254	192.941	135	238	0.994541
9	0.254	115.706	82	141	0.665203	9	0.254	122.5	67	165	0.660901	9	0.254	183.529	114	217	0.946026
10	0.254	87.941	42	156	0.505579	10	0.254	99.765	47	196	0.538243	10	0.254	172.441	101	230	0.888871
11	0.254	98.471	62	147	0.566117	11	0.254	98.794	51	159	0.533005	11	0.254	182.118	132	232	0.938753
12	0.254	107.853	75	144	0.620055	12	0.254	112.324	59	158	0.606	12	0.254	180.735	126	238	0.931624
13	0.254	89.559	59	148	0.514881	13	0.254	85	36	106	0.458584	13	0.254	174.559	107	244	0.899789
14	0.254	90.265	42	124	0.51894	14	0.254	98	48	152	0.528721	14	0.254	180.294	121	217	0.929351
15	0.254	103.412	81	160	0.594523	15	0.254	101.206	55	158	0.546018	15	0.254	176.206	126	240	0.908278
16	0.254	81.324	53	122	0.467538	16	0.254	80.971	40	151	0.436848	16	0.254	174.294	122	230	0.898423
17	0.254	86.059	51	130	0.49476	17	0.254	92.353	52	134	0.498255	17	0.254	179.294	121	226	0.924196
18	0.254	98.676	67	152	0.567296	18	0.254	90.294	55	143	0.487146	18	0.254	179.029	132	253	0.92283
19	0.254	70.824	43	114	0.407173	19	0.254	75.676	37	118	0.40828	19	0.254	163.353	93	216	0.842026
20	0.254	78.206	40	110	0.449612	20	0.254	82.059	56	116	0.442717	20	0.254	166.353	101	238	0.85749
21	0.254	82.912	55	116	0.476667	21	0.254	84.088	41	127	0.453664	21	0.254	176.412	97	225	0.90934
22	0.254	62.176	35	111	0.357455	22	0.254	67.765	38	100	0.3656	22	0.254	167.735	112	215	0.864613
23	0.254	77.5	39	107	0.445553	23	0.254	71.941	43	100	0.38813	23	0.254	171.029	115	229	0.881593
24	0.254	78.882	36	129	0.453499	24	0.254	82.147	39	131	0.443192	24	0.254	173.412	109	226	0.893876
25	0.254	62.353	40	97	0.358472	25	0.254	74.088	43	114	0.399713	25	0.254	178.912	114	235	0.922227
26	0.254	71.5	45	111	0.411059	26	0.254	67.676	35	107	0.36512	26	0.254	165.029	128	218	0.850665
27	0.254	67.588	39	117	0.388569	27	0.254	74.853	32	110	0.40384	27	0.254	174.559	116	236	0.899789
28	0.254	65.941	41	99	0.3791	28	0.254	53.529	27	74	0.288795	28	0.254	157.118	89	211	0.809887
29	0.254	63.324	26	103	0.364054	29	0.254	65.706	30	107	0.354491	29	0.254	163.441	100	236	0.842479
30	0.254	68.735	32	98	0.395163	30	0.254	70.324	33	103	0.379406	30	0.254	159.794	112	233	0.82368
1	0.239	186.656	128	223		1	0.239	215.969	159	255		1	0.239	182.469	135	252
2	0.239	192.062	132	246		2	0.239	205.969	142	255		2	0.239	170.75	122	220
3	0.239	187.688	128	255	1	3	0.239	207.156	147	255	1	3	0.239	176.625	94	233	1
4	0.239	123.781	81	165	0.659504	4	0.239	157.312	94	205	0.759389	4	0.239	178.969	130	224	1.01327
5	0.239	152.875	106	201	0.814517	5	0.239	158.094	76	224	0.763164	5	0.239	172.281	114	255	0.975406
6	0.239	155.062	125	202	0.826169	6	0.239	178.938	117	247	0.863784	6	0.239	173	111	224	0.979476
7	0.239	115.938	75	158	0.617717	7	0.239	143.688	86	235	0.693622	7	0.239	175.438	118	244	0.99328
8	0.239	122.594	96	178	0.65318	8	0.239	143.938	90	206	0.694829	8	0.239	171.906	108	212	0.973282
9	0.239	132.438	91	182	0.705628	9	0.239	147.594	106	220	0.712478	9	0.239	169.812	121	208	0.961427
10	0.239	100.656	70	164	0.536294	10	0.239	125.688	61	194	0.606731	10	0.239	173.156	130	226	0.98036
11	0.239	110.844	84	158	0.590576	11	0.239	135.5	81	176	0.654096	11	0.239	176.562	130	246	0.999643
12	0.239	116.625	79	156	0.621377	12	0.239	138.406	85	205	0.668125	12	0.239	171.938	121	230	0.973464
13	0.239	95.656	66	138	0.509654	13	0.239	114.031	58	194	0.55046	13	0.239	171.062	129	212	0.968504
14	0.239	100.062	75	125	0.533129	14	0.239	121.969	68	178	0.588779	14	0.239	174.5	137	216	0.987969
15	0.239	108.062	61	176	0.575753	15	0.239	124.312	86	170	0.600089	15	0.239	175.125	131	228	0.991507
16	0.239	88.125	48	178	0.469529	16	0.239	115.5	61	178	0.557551	16	0.239	174.031	130	237	0.985314
17	0.239	95.219	59	152	0.507326	17	0.239	113.188	70	172	0.54639	17	0.239	167.688	106	233	0.949401
18	0.239	100.125	71	133	0.533465	18	0.239	112.781	75	179	0.544425	18	0.239	158.75	108	207	0.898797
19	0.239	79.656	45	128	0.424406	19	0.239	89.656	48	136	0.432795	19	0.239	167.688	101	222	0.949401
20	0.239	82.875	44	123	0.441557	20	0.239	83.969	56	131	0.405342	20	0.239	169.75	119	231	0.961076
21	0.239	78.375	32	111	0.417581	21	0.239	95.969	57	156	0.463269	21	0.239	168.531	89	215	0.954174
22	0.239	66.875	37	101	0.356309	22	0.239	90.594	49	154	0.437323	22	0.239	165.906	120	213	0.939312
23	0.239	77.438	40	132	0.412589	23	0.239	88.656	57	126	0.427967	23	0.239	159.219	110	230	0.901452
24	0.239	73	35	121	0.388943	24	0.239	87.188	46	127	0.420881	24	0.239	171.062	121	247	0.968504
25	0.239	60.719	29	92	0.32351	25	0.239	71.906	43	119	0.34711	25	0.239	166.594	118	215	0.943207
26	0.239	68.188	47	112	0.363305	26	0.239	76.656	43	113	0.37004	26	0.239	174.719	116	223	0.989209
27	0.239	66.531	46	100	0.354477	27	0.239	69.688	39	130	0.336403	27	0.239	163.094	104	220	0.923391
28	0.239	56.906	30	100	0.303195	28	0.239	67.781	31	109	0.327198	28	0.239	162.781	113	217	0.921619
29	0.239	56.5	26	109	0.301031	29	0.239	77.469	33	133	0.373965	29	0.239	158.625	120	193	0.898089
30	0.239	64.875	32	100	0.345653	30	0.239	70.156	37	105	0.338663	30	0.239	166.25	112	203	0.94126
1	0.195	191.192	155	255		1	0.195	222.5	170	255		1	0.195	179.769	132	232
2	0.195	185.769	117	245		2	0.195	189.731	138	254		2	0.195	169.346	121	208
3	0.195	177.423	128	217	1	3	0.195	185.615	122	237	1	3	0.195	156.154	119	196	1
4	0.195	145.769	105	206	0.82159	4	0.195	155.462	95	214	0.837551	4	0.195	149.846	77	206	0.959604
5	0.195	157.423	108	223	0.887275	5	0.195	148.423	90	197	0.799628	5	0.195	153.769	113	191	0.984727
6	0.195	158.346	115	205	0.892477	6	0.195	158.885	128	204	0.855992	6	0.195	164.231	113	199	1.05172
7	0.195	133.231	87	186	0.750923	7	0.195	141.077	95	205	0.760052	7	0.195	171.385	127	228	1.09754
8	0.195	131.923	75	190	0.743551	8	0.195	136.5	69	180	0.735393	8	0.195	160.808	109	209	1.0298
9	0.195	130.577	82	179	0.735964	9	0.195	133.577	95	187	0.719646	9	0.195	150.846	109	208	0.966008
10	0.195	108.5	68	151	0.611533	10	0.195	117.385	73	156	0.632411	10	0.195	165.423	108	222	1.05936
11	0.195	115	78	170	0.648169	11	0.195	139.308	96	202	0.750521	11	0.195	164.962	113	228	1.05641
12	0.195	131.692	82	189	0.742249	12	0.195	126.615	91	190	0.682138	12	0.195	176.115	131	244	1.12783
13	0.195	115.269	70	167	0.649685	13	0.195	132.692	84	220	0.714878	13	0.195	171.154	124	218	1.09606
14	0.195	128.654	61	204	0.725126	14	0.195	115	80	169	0.619562	14	0.195	157.731	115	225	1.0101
15	0.195	107.923	60	148	0.608281	15	0.195	111.923	69	148	0.602985	15	0.195	146.462	100	198	0.937933
16	0.195	112.577	65	175	0.634512	16	0.195	107.808	61	164	0.580815	16	0.195	163.154	97	213	1.04483
17	0.195	113.115	53	169	0.637544	17	0.195	112.692	63	147	0.607128	17	0.195	154.654	111	207	0.990394
18	0.195	110.423	83	154	0.622371	18	0.195	108.769	77	151	0.585993	18	0.195	164.462	118	249	1.0532
19	0.195	99.538	49	132	0.561021	19	0.195	106	51	167	0.571075	19	0.195	162.385	133	194	1.0399
20	0.195	103.923	69	153	0.585736	20	0.195	112.154	66	148	0.604229	20	0.195	155.269	109	204	0.994333
21	0.195	113.192	77	153	0.637978	21	0.195	111.692	85	155	0.60174	21	0.195	163.808	101	212	1.04902
22	0.195	92.962	42	144	0.523957	22	0.195	92.538	52	129	0.498548	22	0.195	151.077	108	184	0.967487
23	0.195	94.154	57	137	0.530675	23	0.195	97.308	55	147	0.524246	23	0.195	155.885	107	204	0.998277
24	0.195	91.769	46	132	0.517233	24	0.195	99.154	48	148	0.534192	24	0.195	154.654	125	206	0.990394
25	0.195	89.769	55	121	0.50596	25	0.195	88.692	47	134	0.477828	25	0.195	157.654	110	198	1.00961
26	0.195	96.385	41	145	0.54325	26	0.195	79.5	41	123	0.428306	26	0.195	148.731	93	225	0.952464
27	0.195	75.731	40	130	0.426839	27	0.195	73.808	56	101	0.39764	27	0.195	147.846	59	196	0.946796
28	0.195	78.5	46	125	0.442445	28	0.195	78.962	53	125	0.425407	28	0.195	149.538	115	203	0.957632
29	0.195	77.154	49	136	0.434859	29	0.195	78.346	48	117	0.422089	29	0.195	155.615	108	207	0.996548
30	0.195	80.308	39	118	0.452636	30	0.195	83.077	39	118	0.447577	30	0.195	148.577	106	212	0.951477
1	0.239	179.906	148	210		1	0.239	201.375	151	250		1	0.239	202.469	168	219
2	0.239	168.656	138	191		2	0.239	219.062	125	255		2	0.239	197.219	177	220
3	0.239	161.562	110	199	1	3	0.239	169.094	137	218	1	3	0.239	215.531	194	234	1
4	0.239	98.469	69	118	0.609481	4	0.239	107.625	84	134	0.63648	4	0.239	199.25	175	220	0.924461
5	0.239	101.562	75	134	0.628626	5	0.239	102.25	68	127	0.604693	5	0.239	199.844	178	225	0.927217
6	0.239	90.719	65	110	0.561512	6	0.239	103.375	67	128	0.611346	6	0.239	200.594	182	219	0.930697
7	0.239	59.719	45	78	0.369635	7	0.239	59.719	43	80	0.35317	7	0.239	190.5	169	203	0.883864
8	0.239	59.594	42	79	0.368861	8	0.239	56.656	43	74	0.335056	8	0.239	192.438	173	214	0.892855
9	0.239	59.656	43	74	0.369245	9	0.239	53.719	44	71	0.317687	9	0.239	191.875	171	214	0.890243
10	0.239	40.188	28	54	0.248747	10	0.239	37.219	28	50	0.220108	10	0.239	182.594	145	203	0.847182
11	0.239	45.688	33	66	0.282789	11	0.239	40.156	29	50	0.237477	11	0.239	193	167	224	0.895463
12	0.239	44.375	31	59	0.274662	12	0.239	38.031	27	46	0.22491	12	0.239	185.25	157	207	0.859505
13	0.239	31.094	19	40	0.192459	13	0.239	27.031	21	35	0.159858	13	0.239	180.188	158	202	0.836019
14	0.239	32	19	45	0.198066	14	0.239	29.375	24	36	0.17372	14	0.239	179.469	144	211	0.832683
15	0.239	39.969	31	52	0.247391	15	0.239	29.688	22	40	0.175571	15	0.239	185.656	157	208	0.861389
16	0.239	24.156	16	32	0.149515	16	0.239	18.125	11	25	0.107189	16	0.239	183.906	159	209	0.853269
17	0.239	27.438	21	34	0.16983	17	0.239	20.812	14	28	0.123079	17	0.239	177.438	142	209	0.82326
18	0.239	29.594	22	39	0.183174	18	0.239	19.031	13	27	0.112547	18	0.239	183.719	156	214	0.852402
19	0.239	19.875	12	26	0.123018	19	0.239	14.094	9	21	0.0833501	19	0.239	188.906	161	211	0.876468
20	0.239	20.531	14	30	0.127078	20	0.239	15.5	12	23	0.091665	20	0.239	183.406	151	211	0.85095
21	0.239	21.75	14	26	0.134623	21	0.239	16.094	9	27	0.0951778	21	0.239	188.781	167	222	0.875888
22	0.239	15.812	10	21	0.0978695	22	0.239	12.969	7	21	0.076697	22	0.239	180.5	144	209	0.837467
23	0.239	17.5	13	23	0.108318	23	0.239	12.688	7	23	0.0750352	23	0.239	182.594	153	209	0.847182
24	0.239	16.719	12	23	0.103483	24	0.239	11.219	5	16	0.0663477	24	0.239	184.594	156	202	0.856461
25	0.239	12.562	8	19	0.0777534	25	0.239	9.906	6	15	0.0585828	25	0.239	181.375	145	208	0.841526
26	0.239	11.844	4	17	0.0733093	26	0.239	11.844	7	19	0.0700439	26	0.239	177.438	135	214	0.82326
27	0.239	12.688	9	20	0.0785333	27	0.239	12.406	5	19	0.0733675	27	0.239	176	147	213	0.816588
28	0.239	10.188	5	14	0.0630594	28	0.239	9.625	5	14	0.056921	28	0.239	176.625	142	208	0.819488
29	0.239	10.562	5	16	0.0653743	29	0.239	9.75	5	15	0.0576602	29	0.239	173.969	143	190	0.807165
30	0.239	11.094	7	18	0.0686671	30	0.239	10.312	6	16	0.0609838	30	0.239	182.688	164	205	0.847618
1	0.389	140.308	112	174		1	0.389	174.654	136	206		1	0.389	114.5	96	138
2	0.389	136.865	116	173		2	0.389	169	116	190		2	0.389	111.577	94	126
3	0.389	143.327	121	171	1	3	0.389	168.385	143	185	1	3	0.389	107.654	88	129	1
4	0.389	85.673	72	104	0.597745	4	0.389	94.212	75	128	0.559504	4	0.389	108.615	92	129	1.00893
5	0.389	81.942	64	98	0.571714	5	0.389	98.462	74	115	0.584743	5	0.389	112.077	97	126	1.04109
6	0.389	81.269	57	101	0.567018	6	0.389	100.692	80	116	0.597987	6	0.389	114.288	90	135	1.06162
7	0.389	49.135	34	68	0.342817	7	0.389	57.846	40	70	0.343534	7	0.389	103.442	85	129	0.960875
8	0.389	49.885	33	67	0.34805	8	0.389	60.75	49	77	0.36078	8	0.389	108.365	88	130	1.0066
9	0.389	49.019	36	60	0.342008	9	0.389	60.538	51	74	0.359521	9	0.389	110.692	93	123	1.02822
10	0.389	35.212	20	51	0.245676	10	0.389	38.558	27	52	0.228987	10	0.389	104.346	90	130	0.969272
11	0.389	34.827	23	44	0.24299	11	0.389	39.904	33	50	0.236981	11	0.389	105.231	86	124	0.977493
12	0.389	33.538	23	45	0.233996	12	0.389	39.519	31	53	0.234694	12	0.389	104.423	90	119	0.969987
13	0.389	22.904	15	30	0.159802	13	0.389	25.788	19	37	0.153149	13	0.389	101.115	88	117	0.939259
14	0.389	24.25	19	30	0.169194	14	0.389	25.808	20	34	0.153268	14	0.389	102.077	87	115	0.948195
15	0.389	23.788	17	30	0.16597	15	0.389	27.327	19	37	0.162289	15	0.389	100.846	84	116	0.93676
16	0.389	16.808	10	23	0.11727	16	0.389	18.923	12	27	0.112379	16	0.389	101.673	82	116	0.944442
17	0.389	17.846	11	24	0.124512	17	0.389	18.442	13	23	0.109523	17	0.389	99.077	83	117	0.920328
18	0.389	18.5	10	26	0.129075	18	0.389	17.596	13	23	0.104499	18	0.389	101.135	86	119	0.939445
19	0.389	12.058	6	22	0.0841293	19	0.389	13.269	9	20	0.0788016	19	0.389	96.442	74	111	0.895852
20	0.389	12.75	6	19	0.0889574	20	0.389	13.462	6	24	0.0799477	20	0.389	98.577	84	118	0.915684
21	0.389	12.75	6	20	0.0889574	21	0.389	12.269	9	17	0.0728628	21	0.389	96.038	80	115	0.892099
22	0.389	9.096	4	13	0.0634633	22	0.389	10.154	6	16	0.0603023	22	0.389	93.404	75	109	0.867631
23	0.389	9.519	5	15	0.0664146	23	0.389	10.25	6	15	0.0608724	23	0.389	94.096	76	116	0.874059
24	0.389	10.192	6	16	0.0711101	24	0.389	9.788	6	16	0.0581287	24	0.389	99.654	82	116	0.925688
25	0.389	8.308	4	12	0.0579654	25	0.389	7.577	4	11	0.0449981	25	0.389	91.519	73	107	0.850122
26	0.389	8.577	5	14	0.0598422	26	0.389	7.904	4	12	0.04694	26	0.389	90.115	70	102	0.83708
27	0.389	8.673	5	15	0.060512	27	0.389	7.462	4	12	0.0443151	27	0.389	91.385	81	109	0.848877
28	0.389	7.942	4	12	0.0554118	28	0.389	6.981	3	11	0.0414586	28	0.389	92	76	107	0.85459
29	0.389	7.192	3	12	0.050179	29	0.389	6.923	4	11	0.0411141	29	0.389	89.673	76	106	0.832974
30	0.389	6.538	3	13	0.045616	30	0.389	6.673	3	11	0.0396294	30	0.389	92.692	79	108	0.861018
1	0.18	154.25	138	177		1	0.18	129.917	87	157		1	0.18	165.625	146	186
2	0.18	151.25	132	170		2	0.18	118.833	83	154		2	0.18	162.208	122	189
3	0.18	148	118	171	1	3	0.18	113.042	86	138	1	3	0.18	152.833	127	177	1
4	0.18	95.375	69	108	0.644426	4	0.18	86.125	70	103	0.761885	4	0.18	158.792	117	184	1.03899
5	0.18	102.5	82	116	0.692568	5	0.18	86.375	64	106	0.764097	5	0.18	161.458	131	187	1.05643
6	0.18	104.542	87	123	0.706365	6	0.18	84.083	67	100	0.743821	6	0.18	155.208	125	175	1.01554
7	0.18	69.75	62	80	0.471284	7	0.18	61.667	48	74	0.545523	7	0.18	148.125	116	171	0.969195
8	0.18	68.958	57	80	0.465932	8	0.18	56.917	42	81	0.503503	8	0.18	150.417	110	172	0.984192
9	0.18	71.292	61	82	0.481703	9	0.18	60.833	41	77	0.538145	9	0.18	149.208	117	179	0.976281
10	0.18	53.083	46	62	0.358669	10	0.18	47.375	31	56	0.419092	10	0.18	150.792	102	181	0.986646
11	0.18	50.958	38	65	0.344311	11	0.18	48.375	34	59	0.427938	11	0.18	143.792	107	169	0.940844
12	0.18	52.417	45	68	0.354169	12	0.18	48.083	36	64	0.425355	12	0.18	148.25	104	192	0.970013
13	0.18	37.375	31	44	0.252534	13	0.18	31.708	23	44	0.280498	13	0.18	149.333	114	187	0.977099
14	0.18	38.333	31	48	0.259007	14	0.18	36.917	26	47	0.326578	14	0.18	141.625	104	168	0.926665
15	0.18	40.667	31	47	0.274777	15	0.18	37.542	28	48	0.332107	15	0.18	141.958	97	177	0.928844
16	0.18	29.792	23	41	0.201297	16	0.18	25.458	18	36	0.225208	16	0.18	137.542	92	162	0.89995
17	0.18	30.458	25	36	0.205797	17	0.18	29.75	22	37	0.263177	17	0.18	138.292	102	156	0.904857
18	0.18	30.042	22	39	0.202986	18	0.18	27.208	22	36	0.240689	18	0.18	133.458	104	155	0.873228
19	0.18	21.875	16	29	0.147804	19	0.18	19.958	14	27	0.176554	19	0.18	142.292	105	164	0.931029
20	0.18	22.292	18	28	0.150622	20	0.18	19.375	15	29	0.171396	20	0.18	130.792	92	158	0.855784
21	0.18	22.833	15	30	0.154277	21	0.18	19.667	13	26	0.17398	21	0.18	130.583	95	148	0.854416
22	0.18	18.625	14	27	0.125845	22	0.18	16.292	11	23	0.144123	22	0.18	128.417	108	146	0.840244
23	0.18	16.833	12	24	0.113736	23	0.18	15.292	11	20	0.135277	23	0.18	134.417	100	159	0.879502
24	0.18	18.417	14	27	0.124439	24	0.18	15.417	8	21	0.136383	24	0.18	130.917	93	159	0.856602
25	0.18	13.5	8	17	0.0912162	25	0.18	11.875	8	16	0.105049	25	0.18	125.917	90	152	0.823886
26	0.18	15.042	9	21	0.101635	26	0.18	12.542	8	18	0.11095	26	0.18	130.292	102	155	0.852512
27	0.18	15.542	11	20	0.105014	27	0.18	12.167	8	18	0.107633	27	0.18	132.125	101	161	0.864506
28	0.18	11.375	7	18	0.0768581	28	0.18	11.708	6	16	0.103572	28	0.18	120.5	94	146	0.788442
29	0.18	10.583	6	17	0.0715068	29	0.18	10.167	7	15	0.08994	29	0.18	117.958	90	143	0.77181
30	0.18	11.625	8	18	0.0785473	30	0.18	10.667	6	15	0.0943632	30	0.18	122.333	96	149	0.800436
1	0.254	240.324	225	255		1	0.254	246.059	230	255		1	0.254	185.265	155	216
2	0.254	231.088	209	248		2	0.254	241.353	217	255		2	0.254	183.735	169	209
3	0.254	230.412	203	251	1	3	0.254	247.765	230	255	1	3	0.254	177.471	155	212	1
4	0.254	138.559	119	156	0.601353	4	0.254	147.794	133	163	0.596509	4	0.254	170.118	132	197	0.958568
5	0.254	143.5	125	166	0.622797	5	0.254	147.735	129	166	0.596271	5	0.254	171.971	141	194	0.969009
6	0.254	137.353	114	162	0.596119	6	0.254	148.559	135	163	0.599596	6	0.254	181.118	140	215	1.02055
7	0.254	85.794	70	96	0.37235	7	0.254	98.941	75	116	0.399334	7	0.254	171.471	142	220	0.966192
8	0.254	86.971	76	108	0.377459	8	0.254	92.941	82	103	0.375118	8	0.254	167.912	144	194	0.946138
9	0.254	89.029	73	106	0.38639	9	0.254	96.676	79	117	0.390192	9	0.254	176.471	132	209	0.994365
10	0.254	60.235	46	75	0.261423	10	0.254	62.029	50	74	0.250354	10	0.254	167.059	135	188	0.941331
11	0.254	58.265	49	73	0.252873	11	0.254	64.529	55	76	0.260444	11	0.254	165.294	134	194	0.931386
12	0.254	57.588	49	74	0.249935	12	0.254	62.853	47	72	0.25368	12	0.254	166.882	149	208	0.940334
13	0.254	41.941	32	51	0.182026	13	0.254	43.735	36	54	0.176518	13	0.254	160.529	136	192	0.904537
14	0.254	40.294	32	56	0.174878	14	0.254	43.471	33	51	0.175453	14	0.254	159.206	130	188	0.897082
15	0.254	40.441	26	54	0.175516	15	0.254	45.029	36	56	0.181741	15	0.254	148.618	128	174	0.837421
16	0.254	26.324	20	33	0.114248	16	0.254	29.353	22	37	0.118471	16	0.254	159.618	118	188	0.899403
17	0.254	28.412	21	36	0.12331	17	0.254	32	25	42	0.129155	17	0.254	158.265	128	182	0.89178
18	0.254	29.971	23	39	0.130076	18	0.254	33.118	21	42	0.133667	18	0.254	158.441	125	182	0.892771
19	0.254	20.971	14	29	0.0910152	19	0.254	23.206	14	33	0.0936613	19	0.254	158.176	128	183	0.891278
20	0.254	22.471	14	31	0.0975253	20	0.254	20.353	12	29	0.0821464	20	0.254	162.059	142	191	0.913158
21	0.254	20.647	12	30	0.089609	21	0.254	14.382	9	24	0.0580469	21	0.254	163.118	147	178	0.919125
22	0.254	14.882	10	19	0.0645886	22	0.254	11.941	7	18	0.0481949	22	0.254	153.882	117	175	0.867083
23	0.254	15.765	11	19	0.0684209	23	0.254	12.647	9	19	0.0510443	23	0.254	136.618	102	168	0.769805
24	0.254	15.706	12	22	0.0681649	24	0.254	14.382	7	21	0.0580469	24	0.254	136.206	96	186	0.767483
25	0.254	14.618	8	21	0.0634429	25	0.254	13.118	7	22	0.0529453	25	0.254	123.971	84	178	0.698542
26	0.254	15.294	11	22	0.0663768	26	0.254	14.529	9	20	0.0586402	26	0.254	106.676	79	153	0.60109
27	0.254	16.059	11	22	0.0696969	27	0.254	14.5	5	22	0.0585232	27	0.254	110.529	86	151	0.6228
28	0.254	14.588	8	22	0.0633127	28	0.254	14.088	10	19	0.0568603	28	0.254	98.912	72	138	0.557342
29	0.254	15.324	8	22	0.066507	29	0.254	13.676	5	24	0.0551975	29	0.254	94.176	64	146	0.530656
30	0.254	16.912	2	37	0.073399	30	0.254	18.618	2	42	0.0751438	30	0.254	99.382	63	161	0.55999
1	0.516	235.101	177	255		1	0.516	244.145	190	255		1	0.516	163.928	98	221
2	0.516	227.522	154	255		2	0.516	233.696	152	255		2	0.516	150.739	96	205
3	0.516	218.957	138	255	1	3	0.516	234.899	192	255	1	3	0.516	145.768	80	213	1
4	0.516	198.797	137	248	0.907927	4	0.516	213.29	171	253	0.908007	4	0.516	145.58	95	182	0.99871
5	0.516	202.217	124	255	0.923547	5	0.516	213.971	139	255	0.910906	5	0.516	147.681	94	197	1.01312
6	0.516	204.058	146	255	0.931955	6	0.516	211.478	138	255	0.900293	6	0.516	141.957	100	204	0.973856
7	0.516	188.348	130	252	0.860205	7	0.516	190.072	107	244	0.809165	7	0.516	143.029	91	192	0.98121
8	0.516	189.435	118	247	0.86517	8	0.516	200.696	160	247	0.854393	8	0.516	141.71	69	207	0.972161
9	0.516	189.986	120	255	0.867686	9	0.516	200.319	126	255	0.852788	9	0.516	141.797	70	204	0.972758
10	0.516	161.739	100	231	0.738679	10	0.516	177.319	130	248	0.754873	10	0.516	150.449	87	202	1.03211
11	0.516	164.928	111	214	0.753244	11	0.516	178.551	110	255	0.760118	11	0.516	144.058	95	205	0.988269
12	0.516	171.58	99	231	0.783624	12	0.516	185.043	127	247	0.787756	12	0.516	146.42	83	204	1.00447
13	0.516	162.638	109	236	0.742785	13	0.516	166.203	115	255	0.707551	13	0.516	139.261	94	213	0.955361
14	0.516	170.275	95	247	0.777664	14	0.516	177.681	95	241	0.756414	14	0.516	143.014	96	193	0.981107
15	0.516	168.406	107	247	0.769128	15	0.516	183.507	112	244	0.781217	15	0.516	143.116	95	191	0.981807
16	0.516	159.565	91	227	0.72875	16	0.516	159.377	95	236	0.678492	16	0.516	140.072	95	199	0.960924
17	0.516	155.623	84	221	0.710747	17	0.516	161.551	119	228	0.687747	17	0.516	138.986	83	226	0.953474
18	0.516	160.551	72	221	0.733254	18	0.516	161.203	107	204	0.686265	18	0.516	136.652	87	239	0.937462
19	0.516	137.449	83	196	0.627744	19	0.516	144.681	97	217	0.615929	19	0.516	137.203	103	180	0.941242
20	0.516	134.522	82	185	0.614376	20	0.516	147.217	92	201	0.626725	20	0.516	134.971	79	201	0.92593
21	0.516	144.71	84	201	0.660906	21	0.516	148.681	94	205	0.632957	21	0.516	139.319	73	202	0.955758
22	0.516	126.696	84	198	0.578634	22	0.516	135.638	87	197	0.577431	22	0.516	142.522	77	201	0.977732
23	0.516	128.812	67	224	0.588298	23	0.516	139.464	98	199	0.593719	23	0.516	142.217	87	207	0.975639
24	0.516	130.913	74	207	0.597894	24	0.516	137.449	81	191	0.585141	24	0.516	135.58	80	196	0.930108
25	0.516	120.391	65	189	0.549839	25	0.516	128.174	76	184	0.545656	25	0.516	146.246	75	226	1.00328
26	0.516	120.812	70	189	0.551761	26	0.516	132.174	88	201	0.562684	26	0.516	144.783	91	191	0.993243
27	0.516	123.899	87	177	0.56586	27	0.516	128.652	69	173	0.547691	27	0.516	147.696	87	207	1.01323
28	0.516	115.464	72	173	0.527336	28	0.516	119.826	63	172	0.510117	28	0.516	145.826	112	214	1.0004
29	0.516	110.681	54	157	0.505492	29	0.516	117.971	71	165	0.50222	29	0.516	144.232	87	203	0.989463
30	0.516	119.594	67	176	0.546199	30	0.516	122.319	65	185	0.52073	30	0.516	143.304	95	208	0.983096
1	0.329	221.659	173	255		1	0.329	240.023	198	255		1	0.195	241.423	199	255
2	0.329	210.25	132	253		2	0.329	223.455	161	255		2	0.195	235.154	196	255
3	0.329	203.091	140	251	1	3	0.329	226.795	134	255	1	3	0.195	234.385	179	255	1
4	0.329	185.864	129	240	0.915176	4	0.329	204.75	128	255	0.902798	4	0.195	234.038	206	255	0.99852
5	0.329	172.773	119	237	0.850717	5	0.329	201.25	128	255	0.887365	5	0.195	225.654	170	255	0.962749
6	0.329	187	137	236	0.92077	6	0.329	201.455	137	255	0.888269	6	0.195	218.192	169	245	0.930913
7	0.329	156.523	112	231	0.770704	7	0.329	176.614	128	229	0.778739	7	0.195	220.846	162	255	0.942236
8	0.329	156.182	94	223	0.769025	8	0.329	172.955	125	241	0.762605	8	0.195	222.038	145	255	0.947322
9	0.329	161.591	103	214	0.795658	9	0.329	173.295	119	245	0.764104	9	0.195	225.846	160	255	0.963568
10	0.329	150.682	94	220	0.741943	10	0.329	161.295	100	237	0.711193	10	0.195	225.462	160	255	0.96193
11	0.329	139.205	91	193	0.685432	11	0.329	159.205	99	244	0.701978	11	0.195	222.692	164	255	0.950112
12	0.329	138.705	93	188	0.68297	12	0.329	150.955	99	188	0.665601	12	0.195	224.308	163	255	0.957007
13	0.329	131.091	90	195	0.645479	13	0.329	149.659	102	200	0.659887	13	0.195	209.038	168	247	0.891857
14	0.329	120.545	70	165	0.593552	14	0.329	142.295	94	193	0.627417	14	0.195	233.615	190	255	0.996715
15	0.329	133.023	99	182	0.654992	15	0.329	146.864	88	212	0.647563	15	0.195	224.423	163	255	0.957497
16	0.329	118.727	82	216	0.5846	16	0.329	129.023	79	198	0.568897	16	0.195	220.731	157	255	0.941745
17	0.329	112.295	61	178	0.552929	17	0.329	122.318	65	225	0.539333	17	0.195	218.154	174	249	0.930751
18	0.329	120.955	80	175	0.59557	18	0.329	125.5	67	192	0.553363	18	0.195	224.5	180	255	0.957826
19	0.329	114.295	56	167	0.562777	19	0.329	119.455	75	164	0.526709	19	0.195	212.077	149	255	0.904823
20	0.329	107.477	73	155	0.529206	20	0.329	118.182	66	185	0.521096	20	0.195	212	154	255	0.904495
21	0.329	105.773	74	168	0.520816	21	0.329	114.432	65	166	0.504561	21	0.195	208.346	156	255	0.888905
22	0.329	102.705	61	161	0.505709	22	0.329	103.864	62	165	0.457964	22	0.195	212.423	169	248	0.906299
23	0.329	102.409	65	171	0.504252	23	0.329	101.068	64	167	0.445636	23	0.195	220.346	183	255	0.940103
24	0.329	102.591	63	157	0.505148	24	0.329	95.5	46	150	0.421085	24	0.195	218.731	153	255	0.933212
25	0.329	96.773	55	145	0.476501	25	0.329	89.477	58	149	0.394528	25	0.195	222.462	166	255	0.949131
26	0.329	88.545	46	144	0.435987	26	0.329	88.295	42	131	0.389316	26	0.195	223.192	191	255	0.952245
27	0.329	91.114	65	130	0.448636	27	0.329	94.727	64	123	0.417677	27	0.195	221.231	176	255	0.943879
28	0.329	94.773	48	148	0.466653	28	0.329	95.455	46	146	0.420887	28	0.195	219.077	164	255	0.934689
29	0.329	86.136	46	124	0.424125	29	0.329	87.523	29	145	0.385912	29	0.195	209.192	150	255	0.892514
30	0.329	93.386	54	157	0.459823	30	0.329	100.409	58	156	0.44273	30	0.195	210.154	149	255	0.896619
1	0.277	253.324	230	255		1	0.277	250.162	216	255		1	0.277	239.649	192	255
2	0.277	247.892	215	255		2	0.277	239.649	155	255		2	0.277	235.865	192	255
3	0.277	248.757	220	255	1	3	0.277	232.541	171	255	1	3	0.277	233.405	205	255	1
4	0.277	234.784	199	255	0.943829	4	0.277	222.351	152	255	0.95618	4	0.277	220.676	140	255	0.945464
5	0.277	231.216	179	255	0.929485	5	0.277	220.027	172	255	0.946186	5	0.277	222.703	180	255	0.954148
6	0.277	226.135	144	255	0.90906	6	0.277	220	159	255	0.94607	6	0.277	218.243	157	255	0.93504
7	0.277	220.189	176	255	0.885157	7	0.277	199.432	143	255	0.857621	7	0.277	219.405	161	251	0.940018
8	0.277	221.73	163	255	0.891352	8	0.277	197.378	120	247	0.848788	8	0.277	221.784	165	255	0.950211
9	0.277	221.297	166	255	0.889611	9	0.277	198.432	133	255	0.85332	9	0.277	222.378	189	255	0.952756
10	0.277	212.973	172	255	0.856149	10	0.277	189.351	101	255	0.814269	10	0.277	218.027	162	255	0.934115
11	0.277	213.595	146	255	0.858649	11	0.277	187.162	100	255	0.804856	11	0.277	222.243	157	255	0.952178
12	0.277	216.784	156	255	0.871469	12	0.277	186.189	101	255	0.800672	12	0.277	223.568	172	255	0.957854
13	0.277	201.595	150	255	0.810409	13	0.277	179.081	81	251	0.770105	13	0.277	233.432	191	255	1.00012
14	0.277	204.595	137	255	0.822469	14	0.277	159.432	78	239	0.685608	14	0.277	229.486	185	255	0.983209
15	0.277	203.432	140	247	0.817794	15	0.277	160.216	94	240	0.68898	15	0.277	224.676	176	255	0.962601
16	0.277	190.108	121	250	0.764232	16	0.277	141.405	58	231	0.608086	16	0.277	225.135	160	255	0.964568
17	0.277	199.595	150	246	0.802369	17	0.277	152.135	73	234	0.654229	17	0.277	219.459	151	255	0.94025
18	0.277	195.676	140	244	0.786615	18	0.277	150.297	99	250	0.646325	18	0.277	225.514	166	255	0.966192
19	0.277	190.865	148	239	0.767275	19	0.277	134.027	79	223	0.576359	19	0.277	225.649	203	255	0.96677
20	0.277	184.459	133	231	0.741523	20	0.277	136.838	54	196	0.588447	20	0.277	222.703	194	255	0.954148
21	0.277	184.108	149	237	0.740112	21	0.277	144.081	77	219	0.619594	21	0.277	231.703	188	255	0.992708
22	0.277	177.73	116	218	0.714472	22	0.277	125.595	61	223	0.540098	22	0.277	218.811	164	255	0.937473
23	0.277	171.135	122	242	0.687961	23	0.277	129.027	73	207	0.554857	23	0.277	220.027	188	255	0.942683
24	0.277	173.784	130	228	0.698609	24	0.277	122.73	53	190	0.527778	24	0.277	221.27	152	255	0.948009
25	0.277	172.324	118	234	0.69274	25	0.277	102.973	61	183	0.442817	25	0.277	230.676	187	255	0.988308
26	0.277	162.541	115	230	0.653413	26	0.277	116.757	63	207	0.502092	26	0.277	217.405	176	255	0.93145
27	0.277	172.486	102	236	0.693392	27	0.277	112.73	61	177	0.484775	27	0.277	220.189	178	255	0.943377
28	0.277	160.162	110	226	0.643849	28	0.277	105.108	42	188	0.451998	28	0.277	225.324	163	255	0.965378
29	0.277	156.73	110	205	0.630053	29	0.277	104.108	56	177	0.447697	29	0.277	225.324	171	255	0.965378
30	0.277	148.162	100	198	0.595609	30	0.277	102.811	61	161	0.44212	30	0.277	229.324	187	255	0.982515
1	0.329	251.409	226	255		1	0.329	239.409	166	255		1	0.329	146.773	97	229
2	0.329	246.75	204	255		2	0.329	240.5	155	255		2	0.329	140.705	89	186
3	0.329	244.75	222	255	1	3	0.329	239.227	200	255	1	3	0.329	142.409	80	212	1
4	0.329	202.659	129	252	0.828025	4	0.329	216.523	134	255	0.905094	4	0.329	135.727	84	194	0.953079
5	0.329	211.5	150	250	0.864147	5	0.329	213.5	136	255	0.892458	5	0.329	129.886	87	175	0.912063
6	0.329	214.545	158	255	0.876588	6	0.329	208.295	118	255	0.8707	6	0.329	138.455	98	183	0.972235
7	0.329	186.136	134	241	0.760515	7	0.329	205.75	146	255	0.860062	7	0.329	133.636	84	197	0.938396
8	0.329	197.477	129	247	0.806852	8	0.329	206.773	127	255	0.864338	8	0.329	130	84	190	0.912864
9	0.329	197.182	124	251	0.805647	9	0.329	214.341	131	255	0.895973	9	0.329	140.273	95	196	0.985001
10	0.329	172.159	122	214	0.703408	10	0.329	185.5	95	255	0.775414	10	0.329	135.773	88	209	0.953402
11	0.329	194.795	131	247	0.795894	11	0.329	190.068	117	255	0.794509	11	0.329	143.023	64	199	1.00431
12	0.329	181.523	126	236	0.741667	12	0.329	184	63	255	0.769144	12	0.329	127.182	83	176	0.893076
13	0.329	158	110	252	0.645557	13	0.329	157.386	64	255	0.657894	13	0.329	128.432	77	180	0.901853
14	0.329	164.432	115	213	0.671837	14	0.329	153.136	76	255	0.640128	14	0.329	131.068	100	199	0.920363
15	0.329	169.205	120	217	0.691338	15	0.329	139.727	45	255	0.584077	15	0.329	117.091	72	154	0.822216
16	0.329	150.045	91	228	0.613054	16	0.329	132.636	78	242	0.554436	16	0.329	124.159	66	173	0.871848
17	0.329	160.205	91	214	0.654566	17	0.329	139.818	53	229	0.584457	17	0.329	123.023	86	181	0.863871
18	0.329	168.932	103	218	0.690223	18	0.329	149.909	73	239	0.626639	18	0.329	124.75	71	182	0.875998
19	0.329	153.318	113	218	0.626427	19	0.329	146.864	69	225	0.613911	19	0.329	126.818	81	183	0.89052
20	0.329	164.205	99	237	0.670909	20	0.329	157.205	54	253	0.657137	20	0.329	126.75	87	179	0.890042
21	0.329	155.182	108	200	0.634043	21	0.329	154.5	89	255	0.64583	21	0.329	122.182	49	165	0.857965
22	0.329	126.909	80	165	0.518525	22	0.329	130	74	226	0.543417	22	0.329	129.318	65	179	0.908075
23	0.329	142.295	90	216	0.581389	23	0.329	136.341	78	234	0.569923	23	0.329	126.045	80	179	0.885092
24	0.329	140.932	94	200	0.57582	24	0.329	130.295	57	196	0.54465	24	0.329	122.818	82	181	0.862431
25	0.329	125.523	78	169	0.512862	25	0.329	136.182	82	191	0.569258	25	0.329	127.023	84	195	0.891959
26	0.329	125.818	81	175	0.514067	26	0.329	127.818	69	197	0.534296	26	0.329	123.432	76	173	0.866743
27	0.329	144.682	98	196	0.591142	27	0.329	141.159	98	217	0.590063	27	0.329	136.614	84	184	0.959307
28	0.329	110.182	55	169	0.450182	28	0.329	131.295	72	221	0.54883	28	0.329	123.727	88	166	0.868814
29	0.329	116.341	59	198	0.475346	29	0.329	117.432	59	176	0.490881	29	0.329	128.068	75	187	0.899297
30	0.329	117.091	80	191	0.478411	30	0.329	121.091	66	201	0.506176	30	0.329	135.864	94	184	0.954041
1	0.277	252.838	232	255		1	0.277	242.216	189	255		1	0.277	238.459	214	255
2	0.277	243.784	195	255		2	0.277	222.243	166	255		2	0.277	224.189	163	255
3	0.277	240	198	255	1	3	0.277	220.541	147	255	1	3	0.277	215.297	155	255	1
4	0.277	206.324	144	255	0.859683	4	0.277	171.243	128	233	0.776468	4	0.277	214.622	167	255	0.996865
5	0.277	215.703	156	255	0.898763	5	0.277	180.432	139	251	0.818134	5	0.277	214.351	151	255	0.995606
6	0.277	215.676	165	255	0.89865	6	0.277	188.973	139	244	0.856861	6	0.277	208.838	173	255	0.97
7	0.277	185.108	121	237	0.771283	7	0.277	160.595	107	200	0.728187	7	0.277	205.811	146	255	0.95594
8	0.277	197.676	153	240	0.82365	8	0.277	164.027	119	220	0.743748	8	0.277	202.946	143	241	0.942633
9	0.277	198.27	152	255	0.826125	9	0.277	172.405	121	245	0.781737	9	0.277	205.378	147	252	0.953929
10	0.277	169.432	123	230	0.705967	10	0.277	137.297	90	204	0.622546	10	0.277	207.405	156	253	0.963344
11	0.277	178.135	124	235	0.742229	11	0.277	145.135	114	180	0.658086	11	0.277	194.541	150	244	0.903594
12	0.277	177.162	102	229	0.738175	12	0.277	153.108	109	208	0.694238	12	0.277	195.378	137	249	0.907481
13	0.277	145.595	100	199	0.606646	13	0.277	131.459	91	175	0.596075	13	0.277	197.676	139	238	0.918155
14	0.277	155.73	121	242	0.648875	14	0.277	134.946	102	178	0.611886	14	0.277	207.297	156	236	0.962842
15	0.277	147.811	103	207	0.615879	15	0.277	141.919	95	193	0.643504	15	0.277	200.486	131	242	0.931207
16	0.277	134.297	96	168	0.559571	16	0.277	119.27	83	158	0.540806	16	0.277	190.595	138	238	0.885265
17	0.277	153.919	109	236	0.641329	17	0.277	125.459	72	199	0.568869	17	0.277	198.514	145	242	0.922047
18	0.277	144.946	112	202	0.603942	18	0.277	125.514	75	176	0.569119	18	0.277	198.486	135	248	0.921917
19	0.277	140.135	102	185	0.583896	19	0.277	105.541	60	154	0.478555	19	0.277	205.784	148	255	0.955815
20	0.277	133.324	75	178	0.555517	20	0.277	109.838	75	161	0.498039	20	0.277	198.081	125	248	0.920036
21	0.277	131.054	76	204	0.546058	21	0.277	113.973	63	162	0.516788	21	0.277	209.297	159	255	0.972132
22	0.277	117.486	63	175	0.489525	22	0.277	98.838	57	150	0.448162	22	0.277	204.676	147	248	0.950668
23	0.277	125.378	69	178	0.522408	23	0.277	109.216	60	158	0.495219	23	0.277	200.973	126	255	0.933469
24	0.277	126.189	81	170	0.525787	24	0.277	117.676	50	167	0.533579	24	0.277	207.216	146	247	0.962466
25	0.277	103.243	61	130	0.430179	25	0.277	87.73	60	132	0.397795	25	0.277	195.973	152	242	0.910245
26	0.277	109.27	67	153	0.455292	26	0.277	101.27	61	162	0.459189	26	0.277	202.108	144	255	0.93874
27	0.277	120.432	71	166	0.5018	27	0.277	101.054	67	140	0.45821	27	0.277	198.703	144	245	0.922925
28	0.277	100.784	67	137	0.419933	28	0.277	89.946	50	125	0.407843	28	0.277	203.649	140	255	0.945898
29	0.277	108.351	67	155	0.451462	29	0.277	91.27	54	148	0.413846	29	0.277	195.108	131	251	0.906227
30	0.277	100.405	66	152	0.418354	30	0.277	86.27	51	138	0.391174	30	0.277	188.865	120	246	0.87723
1	0.389	239.635	197	255		1	0.389	233.788	171	255		1	0.389	249.519	215	255
2	0.389	231.577	183	255		2	0.389	217.731	139	255		2	0.389	244.154	199	255
3	0.389	226.019	160	255	1	3	0.389	214.808	162	253	1	3	0.389	237.404	179	255	1
4	0.389	171.019	117	234	0.756658	4	0.389	165.173	102	225	0.768933	4	0.389	234.385	177	255	0.987283
5	0.389	183.192	119	234	0.810516	5	0.389	170.615	107	235	0.794267	5	0.389	231.327	177	255	0.974402
6	0.389	186.923	99	236	0.827023	6	0.389	180.923	113	239	0.842254	6	0.389	234.538	182	255	0.987928
7	0.389	154.558	122	196	0.683827	7	0.389	143.865	92	221	0.669738	7	0.389	235.981	174	255	0.994006
8	0.389	160.808	104	221	0.71148	8	0.389	156.481	113	226	0.728469	8	0.389	233.5	195	255	0.983555
9	0.389	162.038	116	209	0.716922	9	0.389	160.885	101	233	0.748971	9	0.389	234.25	189	255	0.986715
10	0.389	134.596	97	194	0.595507	10	0.389	129.077	73	208	0.600895	10	0.389	229.5	171	255	0.966707
11	0.389	148.423	106	199	0.656684	11	0.389	135.788	76	187	0.632137	11	0.389	239.058	194	255	1.00697
12	0.389	151.288	76	207	0.66936	12	0.389	144.173	107	197	0.671171	12	0.389	233.481	185	255	0.983475
13	0.389	127.904	56	170	0.565899	13	0.389	120.212	78	181	0.559625	13	0.389	231.538	146	255	0.975291
14	0.389	136.885	83	194	0.605635	14	0.389	131.327	85	192	0.611369	14	0.389	223.25	183	255	0.94038
15	0.389	137.615	70	213	0.608865	15	0.389	132.212	78	181	0.615489	15	0.389	223.385	160	255	0.940949
16	0.389	112.712	70	167	0.498684	16	0.389	103.423	68	157	0.481467	16	0.389	217.673	153	255	0.916889
17	0.389	121.654	83	171	0.538247	17	0.389	110.846	68	155	0.516024	17	0.389	219.942	150	255	0.926446
18	0.389	119.231	66	166	0.527526	18	0.389	114.692	69	171	0.533928	18	0.389	222.308	161	255	0.936412
19	0.389	103.596	50	144	0.458351	19	0.389	101.596	58	142	0.472962	19	0.389	219.173	132	255	0.923207
20	0.389	107.596	61	160	0.476048	20	0.389	101.981	66	180	0.474754	20	0.389	220.308	152	255	0.927988
21	0.389	113.038	63	154	0.500126	21	0.389	107.981	56	168	0.502686	21	0.389	219.038	173	255	0.922638
22	0.389	95.173	54	147	0.421084	22	0.389	89.385	50	130	0.416116	22	0.389	217.942	146	255	0.918022
23	0.389	97.519	59	140	0.431464	23	0.389	94.731	49	144	0.441003	23	0.389	214.288	155	255	0.90263
24	0.389	111.019	72	184	0.491193	24	0.389	100.635	49	160	0.468488	24	0.389	214.654	158	255	0.904172
25	0.389	90.981	54	121	0.402537	25	0.389	84.596	31	124	0.393821	25	0.389	219.269	172	255	0.923611
26	0.389	92.404	51	125	0.408833	26	0.389	92.692	55	146	0.431511	26	0.389	221.423	168	255	0.932684
27	0.389	91.865	50	148	0.406448	27	0.389	92.577	61	144	0.430976	27	0.389	220.154	133	255	0.927339
28	0.389	80.846	41	119	0.357696	28	0.389	80.327	51	129	0.373948	28	0.389	225.423	154	255	0.949533
29	0.389	85.212	50	145	0.377013	29	0.389	81.654	38	119	0.380126	29	0.389	221.75	126	255	0.934062
30	0.389	86.288	51	116	0.381773	30	0.389	87.019	43	145	0.405101	30	0.389	220.577	145	255	0.929121
1	0.314	255	255	255		1	0.314	255	255	255		1	0.314	252.024	223	255
2	0.314	255	255	255		2	0.314	255	255	255		2	0.314	248.071	206	255
3	0.314	255	255	255	1	3	0.314	255	255	255	1	3	0.314	241.143	194	255	1
4	0.314	246.976	209	255	0.968533	4	0.314	246.452	192	255	0.966478	4	0.314	242.5	154	255	1.00563
5	0.314	250.19	219	255	0.981137	5	0.314	249.19	197	255	0.977216	5	0.314	243.095	202	255	1.00809
6	0.314	250.381	209	255	0.981886	6	0.314	250.357	203	255	0.981792	6	0.314	242.119	203	255	1.00405
7	0.314	215.214	145	255	0.843976	7	0.314	206.381	126	255	0.809337	7	0.314	240.881	204	255	0.998914
8	0.314	221.619	164	255	0.869094	8	0.314	220.238	164	255	0.863678	8	0.314	237.976	189	255	0.986867
9	0.314	223.69	165	255	0.877216	9	0.314	226.119	150	255	0.886741	9	0.314	243.262	198	255	1.00879
10	0.314	164.143	93	225	0.643698	10	0.314	177.881	117	230	0.697573	10	0.314	229.476	180	255	0.951618
11	0.314	169.714	112	233	0.665545	11	0.314	186.476	135	241	0.731278	11	0.314	234.69	180	255	0.97324
12	0.314	175.643	107	244	0.688796	12	0.314	186.81	133	246	0.732588	12	0.314	241.69	206	255	1.00227
13	0.314	136.524	96	192	0.535388	13	0.314	146.667	94	208	0.575165	13	0.314	231.262	191	255	0.959024
14	0.314	152.429	105	248	0.597761	14	0.314	157	88	218	0.615686	14	0.314	232.286	194	255	0.963271
15	0.314	163.048	116	222	0.639404	15	0.314	156.167	109	204	0.61242	15	0.314	239.905	207	255	0.994866
16	0.314	114.595	73	158	0.449392	16	0.314	123.476	78	166	0.48422	16	0.314	227.381	163	255	0.94293
17	0.314	130.976	71	200	0.513631	17	0.314	138.81	82	204	0.544353	17	0.314	230.286	163	255	0.954977
18	0.314	130.071	78	194	0.510082	18	0.314	131.976	81	191	0.517553	18	0.314	228.667	177	255	0.948263
19	0.314	99.476	49	139	0.390102	19	0.314	102.595	54	150	0.402333	19	0.314	231.262	189	255	0.959024
20	0.314	109.357	53	160	0.428851	20	0.314	114.429	57	160	0.448741	20	0.314	237.714	193	255	0.98578
21	0.314	110.333	57	209	0.432678	21	0.314	106.429	64	160	0.417369	21	0.314	229.429	171	255	0.951423
22	0.314	87.214	48	134	0.342016	22	0.314	81.786	44	120	0.320729	22	0.314	228.976	190	255	0.949544
23	0.314	92.143	47	128	0.361345	23	0.314	86.119	55	126	0.337722	23	0.314	229.048	167	255	0.949843
24	0.314	94.5	59	133	0.370588	24	0.314	94.262	53	132	0.369655	24	0.314	231.167	182	255	0.95863
25	0.314	66.643	34	107	0.261345	25	0.314	72.476	27	103	0.28422	25	0.314	225.286	154	255	0.934242
26	0.314	73.286	39	105	0.287396	26	0.314	76.738	39	111	0.300933	26	0.314	225.738	181	255	0.936117
27	0.314	72.5	41	131	0.284314	27	0.314	74.905	44	107	0.293745	27	0.314	224.786	158	255	0.932169
28	0.314	56.667	26	102	0.222224	28	0.314	60	31	108	0.235294	28	0.314	230.786	175	255	0.95705
29	0.314	64.548	32	98	0.253129	29	0.314	65.286	25	110	0.256024	29	0.314	234.19	180	255	0.971166
30	0.314	64.595	36	103	0.253314	30	0.314	63.857	27	105	0.25042	30	0.314	232.071	162	255	0.962379
1	0.419	227.125	166	255		1	0.419	215.446	155	251		1	0.419	235.357	132	255
2	0.419	215.339	151	255		2	0.419	208.732	163	247		2	0.419	225.143	126	255
3	0.419	203.75	160	255	1	3	0.419	203.732	144	254	1	3	0.419	216.286	144	255	1
4	0.419	169.482	120	241	0.831813	4	0.419	149.518	94	195	0.733896	4	0.419	211.429	154	255	0.977544
5	0.419	179.232	106	249	0.879666	5	0.419	169.554	105	237	0.83224	5	0.419	209.929	136	255	0.970608
6	0.419	175.607	118	215	0.861875	6	0.419	167.357	105	239	0.821457	6	0.419	216.839	138	255	1.00256
7	0.419	146.696	101	221	0.71998	7	0.419	128.589	64	184	0.631167	7	0.419	211.554	126	255	0.978122
8	0.419	156.286	107	223	0.767048	8	0.419	148.911	101	207	0.730916	8	0.419	216.679	137	255	1.00182
9	0.419	161.661	108	219	0.793428	9	0.419	151.696	106	209	0.744586	9	0.419	210.946	126	255	0.97531
10	0.419	128.643	72	197	0.631377	10	0.419	127.179	81	184	0.624247	10	0.419	223.982	133	255	1.03558
11	0.419	138.071	81	178	0.677649	11	0.419	133.232	91	202	0.653957	11	0.419	222.536	147	255	1.0289
12	0.419	149.036	87	220	0.731465	12	0.419	136.911	72	171	0.672015	12	0.419	224.411	148	255	1.03757
13	0.419	118.071	57	167	0.57949	13	0.419	119.304	83	169	0.585593	13	0.419	213.893	132	255	0.988936
14	0.419	136.607	91	224	0.670464	14	0.419	127.607	84	173	0.626347	14	0.419	214.339	121	255	0.990998
15	0.419	136.482	95	188	0.66985	15	0.419	127.125	86	179	0.623982	15	0.419	216.25	135	255	0.999834
16	0.419	119.411	75	185	0.586066	16	0.419	105.429	64	145	0.517489	16	0.419	211.518	137	255	0.977955
17	0.419	120.464	78	209	0.591234	17	0.419	110.786	73	155	0.543783	17	0.419	211.214	133	255	0.97655
18	0.419	129.661	71	181	0.636373	18	0.419	112.571	66	158	0.552545	18	0.419	210.089	139	255	0.971348
19	0.419	103.821	67	164	0.509551	19	0.419	96.304	51	140	0.472699	19	0.419	209.661	116	255	0.969369
20	0.419	112.964	63	172	0.554425	20	0.419	101.071	60	155	0.496098	20	0.419	208.357	119	255	0.96334
21	0.419	115.286	67	160	0.565821	21	0.419	111.304	78	156	0.546326	21	0.419	212.161	105	255	0.980928
22	0.419	99.625	61	166	0.488957	22	0.419	90.357	55	135	0.443509	22	0.419	211.446	124	255	0.977622
23	0.419	109.625	68	171	0.538037	23	0.419	96.393	54	175	0.473136	23	0.419	212.732	137	255	0.983568
24	0.419	111.75	51	159	0.548466	24	0.419	100.375	54	136	0.492682	24	0.419	212.821	116	255	0.98398
25	0.419	93.393	53	146	0.458371	25	0.419	76.714	40	122	0.376544	25	0.419	205.625	121	255	0.950709
26	0.419	96.071	50	155	0.471514	26	0.419	93.857	54	144	0.460689	26	0.419	214.768	154	255	0.992982
27	0.419	109.393	60	158	0.536898	27	0.419	94.554	55	147	0.46411	27	0.419	217.482	144	255	1.00553
28	0.419	80.5	52	124	0.395092	28	0.419	77.429	46	105	0.380053	28	0.419	208.5	110	255	0.964001
29	0.419	94.375	48	137	0.46319	29	0.419	82.268	47	124	0.403805	29	0.419	211.857	131	255	0.979522
30	0.419	98.875	58	170	0.485276	30	0.419	86.464	43	128	0.424401	30	0.419	213.768	110	255	0.988358
1	0.419	245.661	189	255		1	0.419	204.804	87	255		1	0.419	244.964	206	255
2	0.419	236.268	198	255		2	0.419	194.679	112	255		2	0.419	229.143	203	255
3	0.419	235.071	168	255	1	3	0.419	196.536	98	255	1	3	0.419	231.679	174	255	1
4	0.419	168.768	117	240	0.717945	4	0.419	163.339	73	249	0.831089	4	0.419	226.589	185	255	0.97803
5	0.419	195.821	140	250	0.833029	5	0.419	153.554	69	240	0.781302	5	0.419	228.464	173	255	0.986123
6	0.419	197.625	149	246	0.840703	6	0.419	155.875	57	244	0.793112	6	0.419	226.304	170	255	0.9768
7	0.419	159.357	106	209	0.67791	7	0.419	138.625	68	223	0.705342	7	0.419	228.339	160	255	0.985584
8	0.419	176.714	112	237	0.751747	8	0.419	146.732	75	236	0.746591	8	0.419	227.482	127	255	0.981884
9	0.419	179.679	105	236	0.764361	9	0.419	142.679	64	209	0.725969	9	0.419	223.875	178	255	0.966315
10	0.419	145.571	97	205	0.619264	10	0.419	117.589	60	191	0.598308	10	0.419	226.036	178	255	0.975643
11	0.419	154.964	104	208	0.659222	11	0.419	119.857	57	196	0.609848	11	0.419	221.375	172	255	0.955525
12	0.419	165.179	103	213	0.702677	12	0.419	123.018	47	204	0.625931	12	0.419	225.107	169	255	0.971633
13	0.419	129.982	80	193	0.552948	13	0.419	107.071	55	179	0.544791	13	0.419	229.286	181	255	0.989671
14	0.419	133.018	80	204	0.565863	14	0.419	111.625	43	196	0.567962	14	0.419	229.625	160	255	0.991134
15	0.419	152.875	112	213	0.650335	15	0.419	115.268	54	181	0.586498	15	0.419	226.089	157	255	0.975872
16	0.419	111.464	74	160	0.474172	16	0.419	99.071	45	150	0.504086	16	0.419	227.821	164	255	0.983348
17	0.419	122.839	71	182	0.522561	17	0.419	99.036	27	177	0.503908	17	0.419	223.5	160	255	0.964697
18	0.419	124.232	82	192	0.528487	18	0.419	98.268	54	164	0.5	18	0.419	228.929	173	255	0.98813
19	0.419	104.696	57	150	0.44538	19	0.419	89.857	34	157	0.457204	19	0.419	230.893	187	255	0.996607
20	0.419	117.946	63	153	0.501746	20	0.419	87.75	32	188	0.446483	20	0.419	231.107	181	255	0.997531
21	0.419	119.339	85	175	0.507672	21	0.419	91.464	38	179	0.46538	21	0.419	226.893	170	255	0.979342
22	0.419	87.268	45	144	0.371241	22	0.419	87.143	38	141	0.443395	22	0.419	228.286	186	255	0.985355
23	0.419	103.661	69	167	0.440977	23	0.419	93.929	47	157	0.477923	23	0.419	218.232	156	255	0.941958
24	0.419	102.304	62	163	0.435205	24	0.419	86.286	28	142	0.439034	24	0.419	219.911	165	255	0.949206
25	0.419	87.125	45	134	0.370633	25	0.419	73.179	39	131	0.372344	25	0.419	215.429	160	255	0.92986
26	0.419	90.411	48	144	0.384611	26	0.419	77.054	27	137	0.39206	26	0.419	217.536	169	255	0.938954
27	0.419	95.643	53	136	0.406869	27	0.419	83.607	33	126	0.425403	27	0.419	220.982	162	255	0.953828
28	0.419	76.286	42	124	0.324523	28	0.419	68.446	17	118	0.348262	28	0.419	215.625	162	255	0.930706
29	0.419	86.821	52	133	0.369339	29	0.419	71.071	22	132	0.361618	29	0.419	217.125	171	255	0.93718
30	0.419	90.518	45	129	0.385067	30	0.419	71.054	25	111	0.361532	30	0.419	213.839	140	255	0.922997
1	0.516	203.638	124	253		1	0.516	202.42	79	255		1	0.516	217.42	163	255
2	0.516	194.145	119	251		2	0.516	191.348	79	255		2	0.516	206.899	153	253
3	0.516	191.942	133	250	1	3	0.516	189.942	103	255	1	3	0.516	202.449	152	255	1
4	0.516	150.594	82	204	0.784581	4	0.516	159.435	57	253	0.839388	4	0.516	198.13	132	251	0.978666
5	0.516	163.928	119	240	0.85405	5	0.516	165.609	87	241	0.871892	5	0.516	192.986	136	250	0.953257
6	0.516	175	118	238	0.911734	6	0.516	179.362	69	255	0.944299	6	0.516	191.101	128	236	0.943946
7	0.516	141.928	106	214	0.739432	7	0.516	142.145	63	216	0.74836	7	0.516	200.638	139	255	0.991055
8	0.516	146.71	106	206	0.764345	8	0.516	150.377	46	232	0.7917	8	0.516	198.725	108	255	0.981605
9	0.516	155.319	114	219	0.809198	9	0.516	148	77	220	0.779185	9	0.516	197.319	123	251	0.97466
10	0.516	133.029	75	190	0.693069	10	0.516	123.203	31	196	0.648635	10	0.516	201.406	147	255	0.994848
11	0.516	140.029	96	200	0.729538	11	0.516	136.594	63	221	0.719135	11	0.516	200.348	138	255	0.989622
12	0.516	147.246	104	193	0.767138	12	0.516	134.145	40	222	0.706242	12	0.516	198.565	135	241	0.980815
13	0.516	123.174	77	181	0.641725	13	0.516	128.275	51	226	0.675338	13	0.516	193.623	130	250	0.956404
14	0.516	133.159	63	202	0.693746	14	0.516	125.087	58	221	0.658554	14	0.516	196.145	146	245	0.968861
15	0.516	127.928	83	184	0.666493	15	0.516	131.754	64	204	0.693654	15	0.516	200.377	140	255	0.989765
16	0.516	111.536	59	152	0.581092	16	0.516	111.957	61	203	0.589427	16	0.516	196.725	137	244	0.971726
17	0.516	116.29	64	170	0.60586	17	0.516	117.986	38	185	0.621169	17	0.516	199.42	146	255	0.985038
18	0.516	120.942	70	162	0.630097	18	0.516	111.319	49	177	0.586068	18	0.516	200.493	149	252	0.990338
19	0.516	102.377	67	150	0.533375	19	0.516	91.58	34	165	0.482147	19	0.516	193.58	142	253	0.956191
20	0.516	107.696	64	157	0.561086	20	0.516	103.42	34	180	0.544482	20	0.516	200.565	138	253	0.990694
21	0.516	118.348	78	192	0.616582	21	0.516	109	50	201	0.573859	21	0.516	188.812	119	252	0.93264
22	0.516	98.449	55	166	0.51291	22	0.516	98.029	38	185	0.5161	22	0.516	190.449	117	253	0.940726
23	0.516	105.377	60	150	0.549004	23	0.516	97.855	33	153	0.515184	23	0.516	200.275	131	251	0.989261
24	0.516	108.725	62	155	0.566447	24	0.516	101.159	38	176	0.532578	24	0.516	196.754	107	249	0.971869
25	0.516	86.362	56	134	0.449938	25	0.516	97.58	38	150	0.513736	25	0.516	194.681	92	255	0.96163
26	0.516	95.623	54	145	0.498187	26	0.516	93.855	37	148	0.494125	26	0.516	185.942	92	250	0.918463
27	0.516	96.13	59	196	0.500828	27	0.516	89.667	32	147	0.472076	27	0.516	187.246	121	245	0.924905
28	0.516	81.377	39	121	0.423967	28	0.516	86.101	29	156	0.453302	28	0.516	192.304	135	248	0.949889
29	0.516	93.609	53	162	0.487694	29	0.516	88.739	46	149	0.46719	29	0.516	191.232	108	253	0.944593
30	0.516	93.275	53	147	0.485954	30	0.516	91.319	37	141	0.480773	30	0.516	196.826	130	239	0.972225
1	0.389	197.135	123	255		1	0.389	221.769	148	255		1	0.389	231.385	176	255
2	0.389	181.808	115	238		2	0.389	215.481	143	255		2	0.389	219.885	160	255
3	0.389	180.731	127	240	1	3	0.389	207.269	141	255	1	3	0.389	203.192	117	253	1
4	0.389	129.135	86	175	0.714515	4	0.389	155.808	117	220	0.751719	4	0.389	199.942	131	255	0.984005
5	0.389	137.423	84	228	0.760373	5	0.389	162.596	87	210	0.784468	5	0.389	198.462	121	252	0.976722
6	0.389	140.788	92	225	0.778992	6	0.389	169.077	102	246	0.815737	6	0.389	187.058	122	255	0.920597
7	0.389	113.538	64	183	0.628215	7	0.389	129.904	92	216	0.626741	7	0.389	196	139	250	0.964605
8	0.389	124.865	63	200	0.690889	8	0.389	138.654	84	189	0.668957	8	0.389	189.096	127	237	0.930627
9	0.389	128.25	85	188	0.709618	9	0.389	140.904	86	195	0.679812	9	0.389	199.596	146	247	0.982302
10	0.389	94.615	53	132	0.523513	10	0.389	118.75	70	181	0.572927	10	0.389	197.692	104	255	0.972932
11	0.389	108.827	60	160	0.602149	11	0.389	123.846	70	167	0.597513	11	0.389	191.365	134	248	0.941794
12	0.389	108.365	69	170	0.599593	12	0.389	134.442	82	219	0.648635	12	0.389	190.404	114	252	0.937064
13	0.389	83.904	38	121	0.464248	13	0.389	100.404	59	145	0.484414	13	0.389	196.731	126	255	0.968202
14	0.389	99.731	61	151	0.55182	14	0.389	105.788	66	173	0.51039	14	0.389	203.25	135	253	1.00029
15	0.389	99.077	45	148	0.548201	15	0.389	112.25	71	160	0.541567	15	0.389	192.154	118	249	0.945677
16	0.389	81.558	47	142	0.451267	16	0.389	86.019	42	136	0.415011	16	0.389	184.923	111	241	0.91009
17	0.389	87.981	43	133	0.486806	17	0.389	100.788	57	144	0.486267	17	0.389	191.385	136	255	0.941892
18	0.389	89.981	51	134	0.497873	18	0.389	100.635	46	163	0.485528	18	0.389	200.635	136	255	0.987416
19	0.389	67.808	27	110	0.375187	19	0.389	79.904	39	127	0.385509	19	0.389	190.885	118	254	0.939432
20	0.389	73.962	34	117	0.409238	20	0.389	84.058	35	145	0.40555	20	0.389	198.481	142	255	0.976815
21	0.389	76.462	29	131	0.423071	21	0.389	89.442	52	134	0.431526	21	0.389	194.904	151	244	0.959211
22	0.389	61.827	25	110	0.342094	22	0.389	75	47	127	0.361849	22	0.389	192.519	105	241	0.947473
23	0.389	76.019	32	114	0.42062	23	0.389	75.269	37	108	0.363146	23	0.389	194.096	141	246	0.955234
24	0.389	71.981	32	130	0.398277	24	0.389	87.327	52	139	0.421322	24	0.389	184.923	115	248	0.91009
25	0.389	56.327	26	86	0.311662	25	0.389	64.173	27	141	0.309612	25	0.389	197.558	136	241	0.972273
26	0.389	60.827	38	99	0.336561	26	0.389	67.596	26	125	0.326127	26	0.389	203.885	124	255	1.00341
27	0.389	57.596	31	108	0.318684	27	0.389	72.308	31	112	0.348861	27	0.389	201.212	144	251	0.990256
28	0.389	53.942	28	81	0.298466	28	0.389	54.154	29	102	0.261274	28	0.389	203.635	120	255	1.00218
29	0.389	48.904	16	88	0.27059	29	0.389	63.5	28	95	0.306365	29	0.389	197.25	149	247	0.970757
30	0.389	52.962	22	74	0.293043	30	0.389	62.577	35	94	0.301912	30	0.389	197	130	255	0.969526
1	0.479	248.891	212	255		1	0.479	244.031	191	255		1	0.479	243.5	208	255
2	0.479	237.688	189	255		2	0.479	234.469	167	255		2	0.479	231.5	179	255
3	0.479	233	173	255	1	3	0.479	226.141	178	255	1	3	0.479	212.906	151	255	1
4	0.479	196.906	151	253	0.84509	4	0.479	183.328	142	238	0.81068	4	0.479	222.188	173	255	1.0436
5	0.479	205.922	163	255	0.883785	5	0.479	197.812	111	251	0.874729	5	0.479	220.719	166	255	1.0367
6	0.479	218.156	167	255	0.936292	6	0.479	197.453	139	247	0.873141	6	0.479	219.797	156	255	1.03237
7	0.479	157.734	102	210	0.67697	7	0.479	169.844	89	229	0.751054	7	0.479	216.156	164	255	1.01526
8	0.479	182.078	124	255	0.781451	8	0.479	179.484	138	231	0.793682	8	0.479	210.219	161	255	0.987379
9	0.479	185.047	126	243	0.794193	9	0.479	177.609	118	255	0.785391	9	0.479	205.891	144	255	0.967051
10	0.479	153.297	89	222	0.657927	10	0.479	151.172	90	202	0.668486	10	0.479	212.469	156	255	0.997947
11	0.479	167.109	118	231	0.717206	11	0.479	172	103	248	0.760587	11	0.479	220.109	158	255	1.03383
12	0.479	177.891	131	234	0.763481	12	0.479	176.781	90	255	0.781729	12	0.479	216.75	155	255	1.01805
13	0.479	141.875	105	198	0.608906	13	0.479	135.641	78	201	0.599807	13	0.479	222.531	142	255	1.04521
14	0.479	155.906	95	207	0.669124	14	0.479	144.719	99	197	0.63995	14	0.479	212.219	147	255	0.996773
15	0.479	151.422	84	204	0.64988	15	0.479	155.141	90	213	0.686037	15	0.479	211.078	113	255	0.991414
16	0.479	132.344	91	181	0.568	16	0.479	131.484	74	193	0.581425	16	0.479	209.016	142	255	0.981729
17	0.479	133.328	85	204	0.572223	17	0.479	140.391	97	204	0.620812	17	0.479	196.5	144	249	0.922943
18	0.479	141.453	85	228	0.607094	18	0.479	146.391	93	214	0.647344	18	0.479	202.188	146	255	0.949659
19	0.479	117.797	60	177	0.505567	19	0.479	121.125	65	184	0.535617	19	0.479	205.062	137	255	0.963157
20	0.479	133.609	78	184	0.573429	20	0.479	129.766	82	212	0.573828	20	0.479	201.953	142	255	0.948555
21	0.479	138.672	90	198	0.595159	21	0.479	129.141	59	189	0.571064	21	0.479	199.469	130	253	0.936888
22	0.479	112.922	71	165	0.484644	22	0.479	107.922	59	175	0.477233	22	0.479	200.359	120	255	0.941068
23	0.479	123.156	84	171	0.528567	23	0.479	107.75	61	170	0.476473	23	0.479	197.281	115	248	0.926611
24	0.479	128.812	67	176	0.552841	24	0.479	113.672	66	154	0.50266	24	0.479	193.391	124	255	0.90834
25	0.479	109.984	60	157	0.472034	25	0.479	98.531	49	148	0.435706	25	0.479	198.797	134	255	0.933731
26	0.479	116.125	61	167	0.498391	26	0.479	106.562	67	174	0.471219	26	0.479	193.047	133	255	0.906724
27	0.479	121.766	77	206	0.522601	27	0.479	109.297	69	185	0.483314	27	0.479	206.281	150	249	0.968883
28	0.479	93.734	53	141	0.402292	28	0.479	86.078	49	149	0.380639	28	0.479	196.672	142	251	0.92375
29	0.479	116.062	51	158	0.49812	29	0.479	97.812	56	144	0.432527	29	0.479	194.625	124	255	0.914136
30	0.479	110.25	55	197	0.473176	30	0.479	96.469	49	169	0.426588	30	0.479	202.094	122	255	0.949217
1	0.389	230.288	183	255		1	0.389	214.788	157	255		1	0.389	172.231	112	234
2	0.389	216.096	168	255		2	0.389	212.712	166	255		2	0.389	153.135	86	221
3	0.389	217.058	152	255	1	3	0.389	205.615	152	255	1	3	0.389	154.442	97	219	1
4	0.389	211	151	255	0.97209	4	0.389	189.904	128	251	0.92359	4	0.389	144.442	86	192	0.935251
5	0.389	203.519	132	249	0.937625	5	0.389	187.25	116	255	0.910683	5	0.389	145.519	55	207	0.942224
6	0.389	209.269	137	252	0.964116	6	0.389	196.769	123	255	0.956978	6	0.389	150.346	86	204	0.973479
7	0.389	194.904	136	247	0.897935	7	0.389	180.846	112	246	0.879537	7	0.389	145.885	87	205	0.944594
8	0.389	188.654	132	255	0.869141	8	0.389	190.212	137	252	0.925088	8	0.389	155.558	105	217	1.00723
9	0.389	196.808	140	255	0.906707	9	0.389	190.135	146	243	0.924714	9	0.389	147.712	79	222	0.956424
10	0.389	188.269	125	248	0.867367	10	0.389	169.673	122	212	0.825198	10	0.389	149.423	82	218	0.967502
11	0.389	184.558	126	254	0.85027	11	0.389	173.712	104	230	0.844841	11	0.389	146.058	83	227	0.945714
12	0.389	192.442	139	255	0.886593	12	0.389	177.346	123	240	0.862515	12	0.389	147.808	90	216	0.957045
13	0.389	170.231	116	219	0.784265	13	0.389	166.5	117	228	0.809766	13	0.389	138.231	77	222	0.895035
14	0.389	178.808	110	251	0.82378	14	0.389	169.885	119	230	0.826229	14	0.389	147.788	97	220	0.956916
15	0.389	175.404	130	235	0.808097	15	0.389	172.308	108	249	0.838013	15	0.389	146.058	81	196	0.945714
16	0.389	170.692	116	223	0.786389	16	0.389	153.712	90	237	0.747572	16	0.389	161.635	91	208	1.04657
17	0.389	172.404	121	223	0.794276	17	0.389	165.327	103	216	0.804061	17	0.389	150.519	82	199	0.974599
18	0.389	181.846	106	255	0.837776	18	0.389	168.865	106	230	0.821268	18	0.389	149.942	94	227	0.970863
19	0.389	166.519	109	232	0.767164	19	0.389	150.654	79	232	0.732699	19	0.389	155.308	116	235	1.00561
20	0.389	173.269	119	241	0.798261	20	0.389	156.885	87	246	0.763004	20	0.389	147.269	93	209	0.953555
21	0.389	171.577	114	246	0.790466	21	0.389	148.115	98	196	0.720351	21	0.389	146.923	95	199	0.951315
22	0.389	166.135	115	217	0.765395	22	0.389	138.231	88	203	0.672281	22	0.389	153.115	91	213	0.991408
23	0.389	161.019	111	216	0.741825	23	0.389	160.192	104	244	0.779087	23	0.389	153.269	89	225	0.992405
24	0.389	162.192	100	227	0.747229	24	0.389	142.442	98	214	0.692761	24	0.389	148.769	91	211	0.963268
25	0.389	153.865	91	221	0.708866	25	0.389	141.615	80	187	0.688739	25	0.389	144.75	80	249	0.937245
26	0.389	161.75	98	222	0.745193	26	0.389	142.846	91	221	0.694726	26	0.389	142.346	80	199	0.921679
27	0.389	156.827	115	212	0.722512	27	0.389	145.558	79	185	0.707915	27	0.389	146.731	91	207	0.950072
28	0.389	143.365	96	202	0.660492	28	0.389	132.654	97	176	0.645157	28	0.389	148.75	74	197	0.963145
29	0.389	157	99	220	0.723309	29	0.389	134.423	88	191	0.653761	29	0.389	150.462	93	212	0.97423
30	0.389	151.269	98	199	0.696906	30	0.389	146.115	79	200	0.710624	30	0.389	135.635	87	186	0.878226
1	0.239	238.844	181	255		1	0.239	237.562	181	255		1	0.239	214.094	165	255
2	0.239	226.875	184	255		2	0.239	227.406	154	255		2	0.239	208.406	141	243
3	0.239	232.406	188	255	1	3	0.239	227.312	170	255	1	3	0.239	205.156	166	255	1
4	0.239	205.844	137	255	0.885709	4	0.239	216.406	157	255	0.952022	4	0.239	192.188	146	248	0.93679
5	0.239	212.344	159	255	0.913677	5	0.239	217.562	138	255	0.957107	5	0.239	192	140	247	0.935873
6	0.239	214.469	146	255	0.92282	6	0.239	213.156	133	255	0.937724	6	0.239	192.25	130	250	0.937092
7	0.239	182.312	133	235	0.784455	7	0.239	210.438	114	250	0.925767	7	0.239	195	153	252	0.950496
8	0.239	196.344	139	247	0.844832	8	0.239	205.938	107	255	0.905971	8	0.239	185.812	132	236	0.905711
9	0.239	197.094	157	255	0.848059	9	0.239	211.219	157	255	0.929203	9	0.239	190.188	141	251	0.927041
10	0.239	181.219	127	254	0.779752	10	0.239	190.531	129	255	0.838192	10	0.239	199.531	143	224	0.972582
11	0.239	181.25	135	234	0.779885	11	0.239	172.406	97	255	0.758455	11	0.239	183.812	118	255	0.895962
12	0.239	185.812	125	255	0.799515	12	0.239	179.469	91	239	0.789527	12	0.239	174.531	115	220	0.850723
13	0.239	171.406	133	251	0.737528	13	0.239	167.125	115	213	0.735223	13	0.239	190.406	121	250	0.928103
14	0.239	172.375	127	255	0.741698	14	0.239	175.906	114	249	0.773853	14	0.239	215.656	182	255	1.05118
15	0.239	172.781	119	255	0.743445	15	0.239	178.812	121	249	0.786637	15	0.239	208.531	158	247	1.01645
16	0.239	148.656	104	180	0.639639	16	0.239	163.562	101	228	0.719548	16	0.239	186.344	129	228	0.908304
17	0.239	163.438	109	213	0.703243	17	0.239	157.938	79	228	0.694807	17	0.239	195.156	152	241	0.951257
18	0.239	163.188	127	229	0.702168	18	0.239	167.531	107	225	0.737009	18	0.239	190.406	139	236	0.928103
19	0.239	147.75	103	197	0.635741	19	0.239	162.25	86	246	0.713777	19	0.239	192.75	154	239	0.939529
20	0.239	141.469	87	203	0.608715	20	0.239	143.812	100	226	0.632663	20	0.239	183.906	147	235	0.89642
21	0.239	158.469	91	235	0.681863	21	0.239	138.844	59	193	0.610808	21	0.239	190.844	116	255	0.930238
22	0.239	134.5	77	212	0.578729	22	0.239	133.719	91	221	0.588262	22	0.239	190.562	109	253	0.928864
23	0.239	148.75	111	192	0.640044	23	0.239	139.938	87	185	0.615621	23	0.239	180.75	125	244	0.881037
24	0.239	138.156	95	200	0.59446	24	0.239	139.406	75	180	0.61328	24	0.239	189.844	132	252	0.925364
25	0.239	133.625	92	201	0.574964	25	0.239	135.781	73	210	0.597333	25	0.239	189.719	138	255	0.924755
26	0.239	132.25	65	202	0.569047	26	0.239	124.312	64	199	0.546878	26	0.239	194.562	150	250	0.948361
27	0.239	143.25	95	191	0.616378	27	0.239	129.625	52	198	0.570251	27	0.239	171.281	119	212	0.834882
28	0.239	120.375	78	158	0.517951	28	0.239	119.156	82	196	0.524196	28	0.239	185.812	123	241	0.905711
29	0.239	123.781	84	190	0.532607	29	0.239	118.688	66	190	0.522137	29	0.239	189.406	157	234	0.923229
30	0.239	134.875	96	189	0.580342	30	0.239	129.156	81	181	0.568188	30	0.239	195.125	149	255	0.951106
1	0.449	160.967	95	230		1	0.449	194.45	133	255		1	0.449	236.3	166	255
2	0.449	152.717	102	221		2	0.449	179.167	93	255		2	0.449	227.65	182	255
3	0.449	142.65	94	200	1	3	0.449	180.133	110	255	1	3	0.449	225.717	174	255	1
4	0.449	120.617	72	190	0.845545	4	0.449	176.817	102	255	0.981591	4	0.449	227.65	169	255	1.00856
5	0.449	128.9	82	178	0.90361	5	0.449	173.533	100	255	0.96336	5	0.449	215.433	164	255	0.954439
6	0.449	129.533	73	184	0.908048	6	0.449	167.583	96	254	0.930329	6	0.449	225.9	158	255	1.00081
7	0.449	115.983	59	163	0.81306	7	0.449	147.867	59	246	0.820877	7	0.449	218.033	147	255	0.965957
8	0.449	121.083	73	180	0.848812	8	0.449	168.6	86	252	0.935975	8	0.449	224.117	170	255	0.992911
9	0.449	128.55	84	175	0.901157	9	0.449	163.483	89	231	0.907568	9	0.449	215.75	145	255	0.955843
10	0.449	113.1	77	159	0.79285	10	0.449	151.65	80	250	0.841878	10	0.449	215.833	148	255	0.956211
11	0.449	108	64	162	0.757098	11	0.449	145.317	76	235	0.806721	11	0.449	218.033	151	255	0.965957
12	0.449	111.183	51	172	0.779411	12	0.449	148.967	86	215	0.826983	12	0.449	213.583	157	255	0.946242
13	0.449	100.983	51	141	0.707907	13	0.449	133.917	79	202	0.743434	13	0.449	223.1	164	255	0.988406
14	0.449	104.45	55	146	0.732212	14	0.449	137.167	67	233	0.761476	14	0.449	205.25	137	255	0.909325
15	0.449	100.167	51	172	0.702187	15	0.449	135.85	57	205	0.754165	15	0.449	214.017	155	255	0.948165
16	0.449	95.367	59	146	0.668538	16	0.449	142.9	56	217	0.793303	16	0.449	221.183	148	255	0.979913
17	0.449	94.683	44	133	0.663743	17	0.449	125.583	74	202	0.697168	17	0.449	216.433	151	255	0.958869
18	0.449	107.967	66	154	0.756866	18	0.449	129.167	81	189	0.717065	18	0.449	211.867	135	255	0.93864
19	0.449	88.2	38	148	0.618297	19	0.449	118.117	70	189	0.655721	19	0.449	210.167	138	255	0.931108
20	0.449	88.933	34	131	0.623435	20	0.449	117.917	66	185	0.654611	20	0.449	217.067	136	255	0.961678
21	0.449	93.033	49	151	0.652177	21	0.449	126.067	60	203	0.699855	21	0.449	218.833	148	255	0.969502
22	0.449	82.867	44	132	0.580911	22	0.449	110.7	56	187	0.614546	22	0.449	214.817	150	255	0.951709
23	0.449	85.183	41	131	0.597147	23	0.449	116.383	63	188	0.646095	23	0.449	210.567	171	255	0.932881
24	0.449	90.167	45	145	0.632086	24	0.449	116.667	56	232	0.647671	24	0.449	211.183	155	255	0.93561
25	0.449	77.8	32	126	0.545391	25	0.449	100.95	41	183	0.560419	25	0.449	199.45	96	255	0.883629
26	0.449	84.083	44	131	0.589436	26	0.449	100.6	51	187	0.558476	26	0.449	215.933	163	255	0.956654
27	0.449	89.317	55	137	0.626127	27	0.449	107.55	63	170	0.597059	27	0.449	209.383	147	254	0.927635
28	0.449	75.25	51	107	0.527515	28	0.449	103.567	52	180	0.574947	28	0.449	206.6	143	255	0.915305
29	0.449	83.85	38	141	0.587802	29	0.449	97.25	33	169	0.539879	29	0.449	204.683	144	255	0.906813
30	0.449	75.417	34	126	0.528686	30	0.449	103.1	40	190	0.572355	30	0.449	213.683	146	255	0.946685
1	0.359	219.396	172	255		1	0.359	219.438	172	255		1	0.359	179.625	112	247
2	0.359	207.708	140	255		2	0.359	203.458	138	250		2	0.359	168.062	119	222
3	0.359	197.188	140	243	1	3	0.359	195.333	145	229	1	3	0.359	151.042	72	219	1
4	0.359	166.458	111	227	0.844159	4	0.359	161.208	107	232	0.825298	4	0.359	152.417	99	219	1.0091
5	0.359	182.021	130	244	0.923084	5	0.359	167.979	121	226	0.859962	5	0.359	149.167	107	194	0.987586
6	0.359	174.771	114	237	0.886317	6	0.359	169.812	114	218	0.869346	6	0.359	145.417	94	215	0.962759
7	0.359	164.583	109	210	0.83465	7	0.359	150	94	202	0.767919	7	0.359	160.833	103	208	1.06482
8	0.359	160.542	102	208	0.814157	8	0.359	150.688	99	198	0.771442	8	0.359	147.271	79	195	0.975033
9	0.359	167.562	105	223	0.849758	9	0.359	152.958	79	222	0.783063	9	0.359	134.958	81	194	0.893513
10	0.359	146.521	103	206	0.743052	10	0.359	142.583	86	201	0.729948	10	0.359	141.229	85	202	0.935031
11	0.359	149.083	100	193	0.756045	11	0.359	142.75	89	189	0.730803	11	0.359	146.917	76	216	0.97269
12	0.359	158.458	106	211	0.803588	12	0.359	143.188	95	198	0.733046	12	0.359	154.312	102	208	1.02165
13	0.359	134.771	107	169	0.683465	13	0.359	132.125	84	171	0.676409	13	0.359	145.625	86	226	0.964136
14	0.359	138	102	187	0.69984	14	0.359	132.854	93	187	0.680141	14	0.359	140.667	77	216	0.93131
15	0.359	138.083	81	181	0.700261	15	0.359	134.521	89	178	0.688675	15	0.359	149.25	89	199	0.988136
16	0.359	119.188	64	176	0.604438	16	0.359	119.188	83	168	0.610179	16	0.359	143.667	87	214	0.951173
17	0.359	134.562	90	213	0.682405	17	0.359	122.083	62	177	0.624999	17	0.359	138.542	87	206	0.917242
18	0.359	127.708	78	222	0.647646	18	0.359	121.625	71	176	0.622655	18	0.359	151.458	100	241	1.00275
19	0.359	110.771	59	155	0.561753	19	0.359	110.271	73	166	0.564528	19	0.359	133.667	64	222	0.884966
20	0.359	117.958	43	172	0.598201	20	0.359	110.562	43	172	0.566018	20	0.359	124	73	172	0.820964
21	0.359	118.542	79	174	0.601162	21	0.359	118.021	71	156	0.604204	21	0.359	136.354	85	188	0.902756
22	0.359	97.979	59	146	0.496881	22	0.359	95.812	65	128	0.490506	22	0.359	140.458	94	192	0.929927
23	0.359	107.917	69	153	0.54728	23	0.359	106.604	69	165	0.545755	23	0.359	136.979	78	178	0.906893
24	0.359	112.25	68	164	0.569254	24	0.359	106.646	59	164	0.54597	24	0.359	129.333	71	220	0.856272
25	0.359	92.062	60	142	0.466874	25	0.359	91.375	60	124	0.467791	25	0.359	118.292	75	174	0.783173
26	0.359	108	73	162	0.547701	26	0.359	101.5	58	151	0.519625	26	0.359	116.208	71	172	0.769375
27	0.359	103.354	61	166	0.524139	27	0.359	94.583	55	151	0.484214	27	0.359	121.708	67	170	0.805789
28	0.359	95.917	62	149	0.486424	28	0.359	91.396	60	136	0.467898	28	0.359	117.542	68	195	0.778207
29	0.359	101.542	54	159	0.51495	29	0.359	96.438	45	143	0.493711	29	0.359	114.833	66	179	0.760272
30	0.359	104.958	58	137	0.532274	30	0.359	100.625	58	137	0.515146	30	0.359	120.104	73	174	0.79517
1	0.277	153.324	110	198		1	0.277	218.73	133	255		1	0.157	163.667	127	200
2	0.277	144.838	92	204		2	0.277	206.108	111	255		2	0.157	166.857	115	207
3	0.277	144.703	90	205	1	3	0.277	199.189	108	255	1	3	0.157	137.952	113	193	1
4	0.277	125.351	94	190	0.866264	4	0.277	176.649	91	255	0.886841	4	0.157	155.286	93	201	1.12565
5	0.277	119.027	73	165	0.822561	5	0.277	179.784	107	232	0.90258	5	0.157	157.619	111	223	1.14256
6	0.277	124.054	94	158	0.857301	6	0.277	176.432	93	243	0.885752	6	0.157	155.762	107	202	1.1291
7	0.277	106.541	53	146	0.736274	7	0.277	153.568	58	244	0.770966	7	0.157	154.667	89	229	1.12117
8	0.277	112.108	44	150	0.774746	8	0.277	159.243	82	237	0.799457	8	0.157	155.619	90	191	1.12807
9	0.277	109	80	147	0.753267	9	0.277	151.324	84	243	0.759701	9	0.157	172.048	136	245	1.24716
10	0.277	96.757	68	137	0.668659	10	0.277	138.378	57	253	0.694707	10	0.157	164.381	108	222	1.19158
11	0.277	96.946	61	150	0.669965	11	0.277	121.486	70	206	0.609903	11	0.157	159.143	133	234	1.15361
12	0.277	97.919	68	131	0.676689	12	0.277	121.432	70	193	0.609632	12	0.157	154.952	125	203	1.12323
13	0.277	85.297	50	130	0.589463	13	0.277	110.73	49	196	0.555904	13	0.157	150.381	97	184	1.0901
14	0.277	94.135	49	140	0.650539	14	0.277	111.622	59	189	0.560382	14	0.157	153.762	109	200	1.11461
15	0.277	87.541	54	122	0.60497	15	0.277	113.486	57	183	0.56974	15	0.157	152.857	98	242	1.10804
16	0.277	82.189	41	133	0.567984	16	0.277	101.162	68	164	0.507869	16	0.157	151.048	96	192	1.09493
17	0.277	87.216	52	118	0.602724	17	0.277	108.703	60	184	0.545728	17	0.157	143.143	108	182	1.03763
18	0.277	86.676	45	129	0.598992	18	0.277	105.351	67	175	0.5289	18	0.157	136.619	104	177	0.990337
19	0.277	72.622	44	127	0.501869	19	0.277	106.73	53	205	0.535823	19	0.157	141.143	82	181	1.02313
20	0.277	79.946	37	170	0.552483	20	0.277	99.054	53	187	0.497286	20	0.157	151.19	110	204	1.09596
21	0.277	70.649	42	104	0.488235	21	0.277	99.865	47	167	0.501358	21	0.157	146.571	101	222	1.06248
22	0.277	73.108	33	112	0.505228	22	0.277	89.919	49	133	0.451426	22	0.157	145.429	99	173	1.0542
23	0.277	75.243	43	123	0.519982	23	0.277	81.946	44	163	0.411398	23	0.157	145.095	111	172	1.05178
24	0.277	69.459	25	107	0.480011	24	0.277	83.216	47	136	0.417774	24	0.157	136.286	97	167	0.987923
25	0.277	65.703	41	96	0.454054	25	0.277	76	37	121	0.381547	25	0.157	139.524	113	173	1.0114
26	0.277	68	31	106	0.469928	26	0.277	74.162	45	98	0.37232	26	0.157	131.857	88	159	0.955818
27	0.277	63.162	42	85	0.436494	27	0.277	72.703	38	123	0.364995	27	0.157	144.19	111	193	1.04522
28	0.277	64.135	32	110	0.443218	28	0.277	76.595	37	133	0.384534	28	0.157	140.905	92	196	1.02141
29	0.277	63.568	26	103	0.4393	29	0.277	69.919	41	117	0.351018	29	0.157	130.905	94	169	0.948917
30	0.277	61.919	29	131	0.427904	30	0.277	68.189	40	102	0.342333	30	0.157	135.286	91	175	0.980674
1	0.239	176.656	143	236		1	0.239	220.375	152	255		1	0.239	232	175	255
2	0.239	165.938	117	211		2	0.239	198.344	137	255		2	0.239	210.031	133	255
3	0.239	157.75	118	217	1	3	0.239	172.344	85	241	1	3	0.239	208.906	147	255	1
4	0.239	133.906	84	192	0.848849	4	0.239	165.5	93	235	0.960289	4	0.239	209.562	148	255	1.00314
5	0.239	126.062	75	212	0.799125	5	0.239	170.5	107	211	0.9893	5	0.239	187.156	125	255	0.895886
6	0.239	127.125	64	188	0.805864	6	0.239	165.156	107	212	0.958293	6	0.239	200.312	129	250	0.958862
7	0.239	114.406	64	162	0.725236	7	0.239	136.625	92	193	0.792746	7	0.239	201.406	162	251	0.964099
8	0.239	121.188	74	176	0.768228	8	0.239	153.625	100	212	0.891386	8	0.239	203.031	152	255	0.971877
9	0.239	119.125	76	162	0.755151	9	0.239	138.906	98	206	0.805981	9	0.239	202.906	141	249	0.971279
10	0.239	111.219	57	190	0.705033	10	0.239	116.312	77	162	0.674883	10	0.239	201.969	157	245	0.966794
11	0.239	125.688	56	171	0.796754	11	0.239	131.25	71	183	0.761558	11	0.239	197.625	118	241	0.946
12	0.239	106.406	70	183	0.674523	12	0.239	122.281	71	192	0.709517	12	0.239	195.906	146	247	0.937771
13	0.239	108.25	66	151	0.686212	13	0.239	117.562	56	198	0.682136	13	0.239	187.062	117	247	0.895436
14	0.239	120.219	76	180	0.762086	14	0.239	122.125	68	182	0.708612	14	0.239	188.281	116	246	0.901271
15	0.239	109.938	61	153	0.696913	15	0.239	130.594	87	183	0.757752	15	0.239	192	99	245	0.919074
16	0.239	100.812	38	167	0.639062	16	0.239	124.156	70	175	0.720396	16	0.239	200.469	124	252	0.959613
17	0.239	99.312	57	159	0.629553	17	0.239	129.531	73	173	0.751584	17	0.239	188.312	148	229	0.90142
18	0.239	106.25	63	186	0.673534	18	0.239	125.719	81	177	0.729465	18	0.239	192.531	154	236	0.921615
19	0.239	86.5	58	136	0.548336	19	0.239	112.625	67	161	0.65349	19	0.239	188.75	140	245	0.903516
20	0.239	85.188	33	120	0.540019	20	0.239	114.812	77	173	0.666179	20	0.239	191.938	141	246	0.918777
21	0.239	83.688	43	121	0.53051	21	0.239	119.5	55	162	0.693381	21	0.239	194.031	134	253	0.928796
22	0.239	82.031	39	122	0.520006	22	0.239	110.656	52	148	0.642065	22	0.239	185.094	128	244	0.886016
23	0.239	96.438	53	139	0.611334	23	0.239	105.719	61	163	0.613419	23	0.239	184.656	119	244	0.883919
24	0.239	91.375	47	120	0.579239	24	0.239	105.719	52	138	0.613419	24	0.239	186.781	143	232	0.894091
25	0.239	93.094	58	127	0.590136	25	0.239	108.188	52	158	0.627745	25	0.239	191.5	131	242	0.91668
26	0.239	85	52	122	0.538827	26	0.239	102.75	51	162	0.596191	26	0.239	193.75	152	240	0.927451
27	0.239	89.875	48	134	0.569731	27	0.239	109.594	41	176	0.635903	27	0.239	184.906	126	232	0.885116
28	0.239	83.906	59	113	0.531892	28	0.239	90.594	52	136	0.525658	28	0.239	192.031	135	238	0.919222
29	0.239	81.875	35	136	0.519017	29	0.239	92.406	46	159	0.536172	29	0.239	205.438	152	249	0.983399
30	0.239	88.156	49	141	0.558834	30	0.239	92.812	46	148	0.538528	30	0.239	196.406	155	237	0.940164
1	0.591	198.582	141	255		1	0.591	198.025	146	255		1	0.591	190.481	128	233
2	0.591	178.127	114	244		2	0.591	186.316	136	243		2	0.591	175.139	123	238
3	0.591	163.797	110	226	1	3	0.591	181.595	96	244	1	3	0.591	173.241	105	251	1
4	0.591	143.962	92	195	0.878905	4	0.591	149.582	86	237	0.823712	4	0.591	162.557	101	243	0.938329
5	0.591	152.975	89	226	0.93393	5	0.591	157.329	88	216	0.866373	5	0.591	173.43	130	229	1.00109
6	0.591	144.835	93	213	0.884235	6	0.591	164.266	110	228	0.904573	6	0.591	168.861	112	227	0.974717
7	0.591	129.089	75	189	0.788104	7	0.591	132.443	78	186	0.729332	7	0.591	167.405	121	238	0.966313
8	0.591	130.367	66	194	0.795906	8	0.591	143.646	87	214	0.791024	8	0.591	156.709	90	224	0.904572
9	0.591	140.62	96	223	0.858502	9	0.591	146.19	83	227	0.805033	9	0.591	160.38	100	207	0.925762
10	0.591	123.785	57	182	0.755722	10	0.591	129.848	67	200	0.715042	10	0.591	155.582	93	215	0.898067
11	0.591	131.38	42	190	0.80209	11	0.591	131.987	81	202	0.726821	11	0.591	155.835	84	230	0.899527
12	0.591	136.392	56	204	0.832689	12	0.591	136.873	91	224	0.753727	12	0.591	159.823	108	221	0.922547
13	0.591	112.646	63	207	0.687717	13	0.591	126.81	82	193	0.698312	13	0.591	156.671	106	245	0.904353
14	0.591	113.886	60	162	0.695287	14	0.591	133.506	83	194	0.735185	14	0.591	155.772	102	212	0.899164
15	0.591	126.418	67	195	0.771797	15	0.591	125.797	81	179	0.692734	15	0.591	158.57	94	220	0.915315
16	0.591	109.19	72	152	0.666618	16	0.591	116.835	49	173	0.643382	16	0.591	166.658	107	228	0.962001
17	0.591	118.544	65	172	0.723725	17	0.591	125.848	73	177	0.693015	17	0.591	154.481	83	234	0.891712
18	0.591	121.316	66	197	0.740648	18	0.591	127.316	82	197	0.701099	18	0.591	165.215	118	241	0.953671
19	0.591	104.418	55	148	0.637484	19	0.591	111.709	66	179	0.615155	19	0.591	160.962	104	232	0.929122
20	0.591	107.165	64	162	0.654255	20	0.591	113.329	56	155	0.624076	20	0.591	158.544	89	203	0.915164
21	0.591	116.013	67	183	0.708273	21	0.591	119.063	73	180	0.655651	21	0.591	155.924	102	220	0.900041
22	0.591	98.582	53	150	0.601855	22	0.591	103.937	46	166	0.572356	22	0.591	157.81	75	218	0.910928
23	0.591	104.304	57	158	0.636788	23	0.591	113.747	66	169	0.626377	23	0.591	162.62	103	220	0.938692
24	0.591	112.025	66	203	0.683926	24	0.591	105.481	69	145	0.580859	24	0.591	159.228	119	216	0.919113
25	0.591	100.025	53	139	0.610664	25	0.591	94.139	52	155	0.518401	25	0.591	157.848	108	253	0.911147
26	0.591	102.835	45	148	0.62782	26	0.591	101.608	61	151	0.559531	26	0.591	157.57	100	207	0.909542
27	0.591	104.418	63	175	0.637484	27	0.591	102.329	55	143	0.563501	27	0.591	146.025	102	227	0.842901
28	0.591	92.722	36	154	0.566079	28	0.591	93.114	32	143	0.512756	28	0.591	151.937	105	200	0.877027
29	0.591	96.835	59	152	0.591189	29	0.591	104.899	46	161	0.577654	29	0.591	149.608	97	199	0.863583
30	0.591	102.532	45	157	0.62597	30	0.591	100.152	61	146	0.551513	30	0.591	158.532	110	227	0.915095
1	0.329	156.318	116	196		1	0.329	197.727	107	244		1	0.329	167.455	120	223
2	0.329	155.455	101	210		2	0.329	189.136	107	244		2	0.329	166.25	91	207
3	0.329	149.205	114	205	1	3	0.329	202.432	125	255	1	3	0.329	157.273	105	208	1
4	0.329	141.409	92	205	0.94775	4	0.329	183.045	125	238	0.90423	4	0.329	157.773	120	208	1.00318
5	0.329	139.364	91	209	0.934044	5	0.329	186.318	132	250	0.920398	5	0.329	165.977	99	215	1.05534
6	0.329	147.636	99	202	0.989484	6	0.329	172.75	98	247	0.853373	6	0.329	162.795	124	216	1.03511
7	0.329	128.545	73	185	0.861533	7	0.329	156.364	89	235	0.772427	7	0.329	155.5	105	239	0.988727
8	0.329	123.682	77	172	0.82894	8	0.329	167.455	110	221	0.827216	8	0.329	156.273	110	195	0.993642
9	0.329	133	75	174	0.891391	9	0.329	165.909	98	225	0.819579	9	0.329	145.364	102	197	0.924278
10	0.329	117.273	79	194	0.785986	10	0.329	149.25	96	199	0.737285	10	0.329	159.273	102	205	1.01272
11	0.329	121.205	59	178	0.812339	11	0.329	165.068	113	218	0.815424	11	0.329	154.182	120	208	0.980346
12	0.329	124.091	85	165	0.831681	12	0.329	180.659	124	241	0.892443	12	0.329	148.864	93	200	0.946532
13	0.329	111.773	74	169	0.749124	13	0.329	153.818	67	221	0.75985	13	0.329	151.568	103	209	0.963725
14	0.329	105.841	49	143	0.709366	14	0.329	159.523	109	250	0.788033	14	0.329	153.955	101	223	0.978903
15	0.329	114.795	74	164	0.769378	15	0.329	157.636	112	224	0.778711	15	0.329	149.841	101	192	0.952745
16	0.329	101.864	53	156	0.682712	16	0.329	135.5	84	203	0.669361	16	0.329	154.159	110	210	0.9802
17	0.329	106.568	65	146	0.714239	17	0.329	150.636	82	206	0.744131	17	0.329	154.159	99	220	0.9802
18	0.329	107.045	66	147	0.717436	18	0.329	143.091	102	186	0.70686	18	0.329	162.795	90	215	1.03511
19	0.329	97.568	52	155	0.653919	19	0.329	133	87	165	0.657011	19	0.329	157.182	96	219	0.999421
20	0.329	106.75	66	170	0.715459	20	0.329	132.614	55	228	0.655104	20	0.329	152.023	109	229	0.966619
21	0.329	110.818	64	156	0.742723	21	0.329	144.659	91	209	0.714605	21	0.329	147.886	111	215	0.940314
22	0.329	95.068	50	139	0.637164	22	0.329	114.909	62	184	0.567642	22	0.329	154.75	82	214	0.983958
23	0.329	100.795	49	152	0.675547	23	0.329	138.568	73	203	0.684516	23	0.329	147.545	99	205	0.938146
24	0.329	108.864	53	164	0.729627	24	0.329	130.068	73	174	0.642527	24	0.329	148.341	97	197	0.943207
25	0.329	89.75	36	154	0.601521	25	0.329	118.091	76	201	0.583361	25	0.329	148.341	88	209	0.943207
26	0.329	99.523	64	158	0.667022	26	0.329	119.205	53	199	0.588864	26	0.329	149.136	97	205	0.948262
27	0.329	92.682	42	167	0.621172	27	0.329	116.955	76	159	0.57775	27	0.329	150.614	107	192	0.95766
28	0.329	91.705	53	141	0.614624	28	0.329	121.909	75	196	0.602222	28	0.329	161.455	107	209	1.02659
29	0.329	92.636	55	151	0.620864	29	0.329	123.523	73	221	0.610195	29	0.329	152.864	100	219	0.971966
30	0.329	88.182	52	151	0.591012	30	0.329	125.068	81	206	0.617827	30	0.329	155.091	115	201	0.986126
[truncated: 4 more columns]

## Sheet: NLS-3xGFP
YYB 5552		24h ageing background substracted in FIJI
			0h									24h
			Mean				N/C					Mean				N/C
Nucleus	1	44	1590.66	1008	2037		2.64389		Nucleus	1	51	1333.33	923	1701		4.02366
Cytoplasm	2	44	601.636	393	868				Cytoplasm	2	51	331.373	92	599
Nucleus	3	21	1694.95	1392	1984		3.20436		Nucleus	3	51	3952.8	2825	4705		5.6065
Cytoplasm	4	21	528.952	144	757				Cytoplasm	4	51	705.039	336	1556
Nucleus	5	21	1064.67	795	1267		2.28213		Nucleus	5	70	1933.79	1246	2437		5.01241
Cytoplasm	6	21	466.524	266	669				Cytoplasm	6	70	385.8	53	718
Nucleus	7	21	1362.57	1105	1594		3.31718		Nucleus	7	70	2023.83	1352	2528		5.9026
Cytoplasm	8	21	410.762	164	652				Cytoplasm	8	70	342.871	60	572
Nucleus	9	58	1300.1	696	1665		3.11724		Nucleus	9	68	1119.25	388	1745		2.9744
Cytoplasm	10	58	417.069	109	620				Cytoplasm	10	68	376.294	101	636
Nucleus	11	36	1097.64	803	1539		1.9354		Nucleus	11	80	3129.54	1889	3841		5.25002
Cytoplasm	12	36	567.139	354	854				Cytoplasm	12	80	596.1	339	954
Nucleus	13	52	1127.33	610	1612		2.79921		Nucleus	13	86	1590.26	1007	2106		3.9841
Cytoplasm	14	52	402.731	83	787				Cytoplasm	14	86	399.151	79	966
Nucleus	15	44	753.818	423	1090		2.21017		Nucleus	15	51	832.118	497	1136		3.26096
Cytoplasm	16	44	341.068	85	567				Cytoplasm	16	51	255.176	0	482
Nucleus	17	44	881.659	422	1225		2.03147		Nucleus	1	37	1091.95	704	1523		2.97161
Cytoplasm	18	44	434	141	959				Cytoplasm	2	37	367.459	101	606
Nucleus	1	44	1072.07	728	1461		4.89428		Nucleus	1	122	1562.95	461	2196		4.29514
Cytoplasm	2	44	219.045	0	493				Cytoplasm	2	98	363.888	133	585
Nucleus	1	44	1186.02	818	1460		3.61317		Nucleus	3	44	792.045	445	1196		3.33653
Cytoplasm	2	44	328.25	102	566				Cytoplasm	4	44	237.386	23	600
Nucleus	3	44	1269.61	951	1641		3.40795		Nucleus	5	172	4105.23	1665	5518		5.42316
Cytoplasm	4	44	372.545	64	567				Cytoplasm	6	51	756.98	367	1390
Nucleus	1	44	1113.84	700	1549		3.02974		Nucleus	1	70	1521.8	953	2121		3.44931
Cytoplasm	2	44	367.636	99	657				Cytoplasm	2	42	441.19	143	860
Nucleus	3	44	1249.77	675	1788		3.26311		Nucleus	1	97	3473.79	2226	4312		3.75579
Cytoplasm	4	44	383	125	668				Cytoplasm	2	97	924.918	363	2252
Nucleus	5	42	1311.64	880	1626		2.76704		Nucleus	3	58	1327.74	583	1792		3.64972
Cytoplasm	6	42	474.024	134	1025				Cytoplasm	4	58	363.793	116	627
Nucleus	7	32	1499.34	1021	1950		3.46419		Nucleus	5	86	1950.74	1233	2829		5.85747
Cytoplasm	8	32	432.812	75	819				Cytoplasm	6	86	333.035	0	624
Nucleus	9	37	1558.57	1169	1918		2.30539		Nucleus	7	86	1818.98	1180	2449		4.49711
Cytoplasm	10	37	676.054	397	955				Cytoplasm	8	86	404.477	80	725
Nucleus	11	37	1075.84	633	1478		3.32965		Nucleus	9	97	3209.74	1617	4218		6.51963
Cytoplasm	12	37	323.108	130	645				Cytoplasm	10	97	492.32	118	912
Nucleus	13	37	1917.16	1526	2406		2.72021		Nucleus	11	51	1279.78	949	1563		3.53512
Cytoplasm	14	37	704.784	409	1210				Cytoplasm	12	51	362.02	37	610
Nucleus	15	32	1695.78	1367	2092		2.96968		Nucleus	1	72	1597.25	806	2106		3.05556
Cytoplasm	16	32	571.031	234	811				Cytoplasm	2	72	522.736	149	1152
Nucleus	1	26	1402.81	1057	1696		2.25601		Nucleus	3	36	939.556	387	1314		3.61136
Cytoplasm	2	26	621.808	254	896				Cytoplasm	4	36	260.167	103	466
Nucleus	3	26	1308.35	946	1594		2.77599		Nucleus	1	37	1081.32	558	1523		3.05552
Cytoplasm	4	26	471.308	164	759				Cytoplasm	2	37	353.892	101	606
Nucleus	5	37	1646.78	1275	2037		2.66621		Nucleus	1	70	972.5	568	1379		2.63887
Cytoplasm	6	37	617.649	421	868				Cytoplasm	2	70	368.529	69	605
Nucleus	7	37	1970.54	1439	2348		2.66406		Nucleus	3	70	1803.11	1003	2303		3.93117
Cytoplasm	8	37	739.676	465	1169				Cytoplasm	4	70	458.671	119	960
Nucleus	9	34	1326.09	884	1696		2.08225		Nucleus	5	58	861.276	488	1206		1.94344
Cytoplasm	10	34	636.853	339	896				Cytoplasm	6	58	443.172	158	761
Nucleus	11	34	1291.18	715	1697		2.6398		Nucleus	7	36	1603.11	717	2408		3.1977
Cytoplasm	12	34	489.118	140	781				Cytoplasm	8	36	501.333	296	797
Nucleus	13	34	1177.77	733	1648		2.23149		Nucleus	9	32	833.406	618	1032		2.21026
Cytoplasm	14	34	527.794	107	1019				Cytoplasm	10	32	377.062	52	597
Nucleus	15	34	1655.12	1060	2069		2.79234		Nucleus	1	80	2086.86	1403	2651		5.7235
Cytoplasm	16	34	592.735	383	889				Cytoplasm	2	80	364.613	76	648
Nucleus	17	34	1501.27	1011	1888		2.71001		Nucleus	3	70	1270.27	704	1611		4.23889
Cytoplasm	18	34	553.971	193	750				Cytoplasm	4	70	299.671	71	500
Nucleus	19	69	1228.54	902	1635		3.1189		Nucleus	1	86	941.244	332	1450		4.04998
Cytoplasm	20	20	393.9	161	628				Cytoplasm	2	86	232.407	0	561
Nucleus	21	44	1163.91	735	1513		3.76698		Nucleus	3	58	924.81	543	1258		3.56169
Cytoplasm	22	44	308.977	0	536				Cytoplasm	4	58	259.655	0	520
Nucleus	23	44	848.932	374	1163		3.16203		Nucleus	5	58	1618.57	835	2194		5.81859
Cytoplasm	24	44	268.477	0	524				Cytoplasm	6	58	278.172	113	509
Nucleus	25	44	787	326	1075		2.14574		Nucleus	7	58	1662.5	709	2184		3.07468
Cytoplasm	26	44	366.773	136	582				Cytoplasm	8	58	540.707	187	1162
Nucleus	1	44	1846.16	1276	2417		3.08875		Nucleus	9	61	2427.21	1328	3297		4.28576
Cytoplasm	2	44	597.705	375	809				Cytoplasm	10	61	566.344	287	896
Nucleus	3	34	1443.21	963	1722		2.67888		Nucleus	11	52	640.635	394	1029		2.08872
Cytoplasm	4	34	538.735	271	825				Cytoplasm	12	52	306.712	115	483
Nucleus	5	26	1399	880	1804		2.17353		Nucleus	1	96	2088.59	1150	2704		5.41169
Cytoplasm	6	26	643.654	349	1038				Cytoplasm	2	51	385.941	90	639
Nucleus	7	34	1574.77	1160	2052		2.144		Nucleus	3	79	2281.41	1207	2979		4.70712
Cytoplasm	8	34	734.5	510	922				Cytoplasm	4	79	484.671	233	888
Nucleus	9	37	1567.65	776	2056		2.2326		Nucleus	5	52	893.346	505	1258		3.24808
Cytoplasm	10	37	702.162	239	1286				Cytoplasm	6	52	275.038	60	491
Nucleus	11	37	2045.27	1712	2402		2.47441		Nucleus	7	102	2299.71	1355	2939		3.78912
Cytoplasm	12	37	826.568	333	1374				Cytoplasm	8	26	606.923	271	1293
Nucleus	13	32	994.969	488	1363		2.04845		Nucleus	1	80	2257.05	1406	2965		4.48885
Cytoplasm	14	32	485.719	304	774				Cytoplasm	2	80	502.812	222	1326
Nucleus	15	26	900.654	519	1077		1.79016		Nucleus	3	60	2788.2	1285	3583		5.22559
Cytoplasm	16	26	503.115	203	720				Cytoplasm	4	60	533.567	236	840
Nucleus	17	36	1402.28	867	1749		3.30228		Nucleus	5	60	934	493	1329		2.28781
Cytoplasm	18	36	424.639	84	909				Cytoplasm	6	60	408.25	117	668
Nucleus	19	36	1299.75	782	1704		2.08256		Nucleus	7	70	767.571	507	1024		1.69602
Cytoplasm	20	36	624.111	359	1064				Cytoplasm	8	70	452.571	295	697
Nucleus	21	36	1395.53	964	1824		3.02452		Nucleus	9	52	859.077	383	1177		3.11194
Cytoplasm	22	37	461.405	130	818				Cytoplasm	10	52	276.058	78	505
Nucleus	23	31	1603.87	774	1941		3.01699		Nucleus	11	44	1830.43	1389	2296		3.4538
Cytoplasm	24	31	531.613	235	775				Cytoplasm	12	44	529.977	309	992
Nucleus	1	52	1302.5	871	1797		3.42434		Nucleus	13	44	1479.5	816	2172		3.55824
Cytoplasm	2	52	380.365	0	765				Cytoplasm	14	44	415.795	97	727
Nucleus	3	52	944.962	664	1342		2.41334		Nucleus	15	79	1996.68	1193	2650		5.27887
Cytoplasm	4	52	391.558	154	574				Cytoplasm	16	79	378.241	124	630
Nucleus	5	34	959.5	618	1217		3.32514		Nucleus	17	79	1314.21	556	1843		3.38054
Cytoplasm	6	34	288.559	112	454				Cytoplasm	18	79	388.759	188	984
Nucleus	7	36	973.444	695	1316		3.58836		Nucleus	19	60	1211.77	891	1579		3.66056
Cytoplasm	8	36	271.278	47	449				Cytoplasm	20	60	331.033	1	534
Nucleus	9	36	764.667	457	974		2.8438		Nucleus	1	70	1188.29	555	1626		3.39927
Cytoplasm	10	36	268.889	137	505				Cytoplasm	2	70	349.571	120	610
Nucleus	11	36	1335.11	726	1980		3.02442		Nucleus
Cytoplasm	12	36	441.444	142	835				Cytoplasm
Nucleus
Cytoplasm
Nucleus
Cytoplasm
Nucleus		0H							24H
Cytoplasm		Nucleus	1590.66						NucleusK	1333.33
Nucleus		Nucleus	1694.95						Nucleus	3952.8
Cytoplasm		Nucleus	1064.67						Nucleus	1933.79
Nucleus		Nucleus	1362.57						Nucleus	2023.83
Cytoplasm		Nucleus	1300.1						Nucleus	1119.25
Nucleus		Nucleus	1097.64						Nucleus	3129.54
Cytoplasm		Nucleus	1127.33						Nucleus	1590.26
Nucleus		Nucleus	753.818						Nucleus	832.118
Cytoplasm		Nucleus	881.659						Nucleus	1091.95
Nucleus		Nucleus	1072.07						Nucleus	1562.95
Cytoplasm		Nucleus	1186.02						Nucleus	792.045
Nucleus		Nucleus	1269.61						Nucleus	4105.23
Cytoplasm		Nucleus	1113.84						Nucleus	1521.8
Nucleus		Nucleus	1249.77						Nucleus	3473.79
Cytoplasm		Nucleus	1311.64						Nucleus	1327.74
Nucleus		Nucleus	1499.34						Nucleus	1950.74
Cytoplasm		Nucleus	1558.57						Nucleus	1818.98
Nucleus		Nucleus	1075.84						Nucleus	3209.74
Cytoplasm		Nucleus	1917.16						Nucleus	1279.78
Nucleus		Nucleus	1695.78						Nucleus	1597.25
Cytoplasm		Nucleus	1402.81						Nucleus	939.556
Nucleus		Nucleus	1308.35						Nucleus	1081.32
Cytoplasm		Nucleus	1646.78						Nucleus	972.5
Nucleus		Nucleus	1970.54						Nucleus	1803.11
Cytoplasm		Nucleus	1326.09						Nucleus	861.276
Nucleus		Nucleus	1291.18						Nucleus	1603.11
Cytoplasm		Nucleus	1177.77						Nucleus	833.406
Nucleus		Nucleus	1655.12						Nucleus	2086.86
Cytoplasm		Nucleus	1501.27						Nucleus	1270.27
Nucleus		Nucleus	1228.54						Nucleus	941.244
Cytoplasm		Nucleus	1163.91						Nucleus	924.81
Nucleus		Nucleus	848.932						Nucleus	1618.57
Cytoplasm		Nucleus	787						Nucleus	1662.5
Nucleus		Nucleus	1846.16						Nucleus	2427.21
Cytoplasm		Nucleus	1443.21						Nucleus	640.635
Nucleus		Nucleus	1399						Nucleus	2088.59
Cytoplasm		Nucleus	1574.77						Nucleus	2281.41
Nucleus		Nucleus	1567.65						Nucleus	893.346
Cytoplasm		Nucleus	2045.27						Nucleus	2299.71
Nucleus		Nucleus	994.969						Nucleus	2257.05
Cytoplasm		Nucleus	900.654						Nucleus	2788.2
Nucleus		Nucleus	1402.28						Nucleus	934
Cytoplasm		Nucleus	1299.75						Nucleus	767.571
Nucleus		Nucleus	1395.53						Nucleus	859.077
Cytoplasm		Nucleus	1603.87						Nucleus	1830.43
Nucleus		Nucleus	1302.5						Nucleus	1479.5
Cytoplasm		Nucleus	944.962						Nucleus	1996.68
Nucleus		Nucleus	959.5						Nucleus	1314.21
Cytoplasm		Nucleus	973.444						Nucleus	1211.77
Nucleus		Nucleus	764.667						Nucleus	1188.29
Cytoplasm		Nucleus	1335.11
Nucleus		0H							24H
Cytoplasm		Cytoplasm	601.636						Cytoplasm	331.373
Nucleus		Cytoplasm	528.952						Cytoplasm	705.039
Cytoplasm		Cytoplasm	466.524						Cytoplasm	385.8
Nucleus		Cytoplasm	410.762						Cytoplasm	342.871
Cytoplasm		Cytoplasm	417.069						Cytoplasm	376.294
Nucleus		Cytoplasm	567.139						Cytoplasm	596.1
Cytoplasm		Cytoplasm	402.731						Cytoplasm	399.151
Nucleus		Cytoplasm	341.068						Cytoplasm	255.176
Cytoplasm		Cytoplasm	434						Cytoplasm	367.459
Nucleus		Cytoplasm	219.045						Cytoplasm	363.888
Cytoplasm		Cytoplasm	328.25						Cytoplasm	237.386
Nucleus		Cytoplasm	372.545						Cytoplasm	756.98
Cytoplasm		Cytoplasm	367.636						Cytoplasm	441.19
Nucleus		Cytoplasm	383						Cytoplasm	924.918
Cytoplasm		Cytoplasm	474.024						Cytoplasm	363.793
Nucleus		Cytoplasm	432.812						Cytoplasm	333.035
Cytoplasm		Cytoplasm	676.054						Cytoplasm	404.477
Nucleus		Cytoplasm	323.108						Cytoplasm	492.32
Cytoplasm		Cytoplasm	704.784						Cytoplasm	362.02
Nucleus		Cytoplasm	571.031						Cytoplasm	522.736
Cytoplasm		Cytoplasm	621.808						Cytoplasm	260.167
Nucleus		Cytoplasm	471.308						Cytoplasm	353.892
Cytoplasm		Cytoplasm	617.649						Cytoplasm	368.529
Nucleus		Cytoplasm	739.676						Cytoplasm	458.671
Cytoplasm		Cytoplasm	636.853						Cytoplasm	443.172
Nucleus		Cytoplasm	489.118						Cytoplasm	501.333
Cytoplasm		Cytoplasm	527.794						Cytoplasm	377.062
Nucleus		Cytoplasm	592.735						Cytoplasm	364.613
Cytoplasm		Cytoplasm	553.971						Cytoplasm	299.671
Nucleus		Cytoplasm	393.9						Cytoplasm	232.407
Cytoplasm		Cytoplasm	308.977						Cytoplasm	259.655
Nucleus		Cytoplasm	268.477						Cytoplasm	278.172
Cytoplasm		Cytoplasm	366.773						Cytoplasm	540.707
Nucleus		Cytoplasm	597.705						Cytoplasm	566.344
Cytoplasm		Cytoplasm	538.735						Cytoplasm	306.712
Nucleus		Cytoplasm	643.654						Cytoplasm	385.941
Cytoplasm		Cytoplasm	734.5						Cytoplasm	484.671
Nucleus		Cytoplasm	702.162						Cytoplasm	275.038
Cytoplasm		Cytoplasm	826.568						Cytoplasm	606.923
Nucleus		Cytoplasm	485.719						Cytoplasm	502.812
Cytoplasm		Cytoplasm	503.115						Cytoplasm	533.567
Nucleus		Cytoplasm	424.639						Cytoplasm	408.25
Cytoplasm		Cytoplasm	624.111						Cytoplasm	452.571
Nucleus		Cytoplasm	461.405						Cytoplasm	276.058
Cytoplasm		Cytoplasm	531.613						Cytoplasm	529.977
Nucleus		Cytoplasm	380.365						Cytoplasm	415.795
Cytoplasm		Cytoplasm	391.558						Cytoplasm	378.241
Nucleus		Cytoplasm	288.559						Cytoplasm	388.759
Cytoplasm		Cytoplasm	271.278						Cytoplasm	331.033
Nucleus		Cytoplasm	268.889						Cytoplasm	349.571
Cytoplasm		CytoplKasm	441.444
Nucleus
Cytoplasm
Nucleus
Cytoplasm
Nucleus
Cytoplasm
