# Supplementary material for: DNA circles promote yeast ageing in part through stimulating the reorganization of nuclear pore complexes
Source: eLife. 2022 Apr 4;11:e71196. doi: 10.7554/eLife.71196 (PMC9020822; doi:10.7554/eLife.71196)
Supplement: Figure 7—source data 1. [file elife-71196-fig7-data1.xlsx]

## Sheet: Overview
Relative accumulation of proteins in NPC cap (RA)
Median RA	2.09377	2.44182	2.0895	1.57589	2.47356	1.34293	0.414382
n	19	7	20	10	41	36	53
Strain	Nup60KR_Nup116GFP	Nup60KR_Gle2GFP	Nup60KR_Nup42GFP	Nup60KR_Gle1GFP	Nup170GFP_Nup60KR	Nup60GFP_Nup60KR	Nup60KR_Mlp1GFP
	1.91009	3.65895	2.04561	0.841446	2.7322	1.1085	0.489032
	2.58042	1.79223	1.83379	2.13853	4.82141	0.512565	0.244979
	1.60234	2.5126	1.59857	1.08376	4.2168	1.3441	0.772466
	4.63488	1.22144	2.65604	1.74808	1.55548	0.770056	0.62899
	1.65684	2.53576	1.39516	1.20735	2.40322	1.31284	0.197827
	3.01049	2.44182	2.6563	1.46871	2.70525	0.789153	1.3752
	3.69212	0.847776	0.942388	1.50065	2.75424	1.59164	0.962939
	2.00284		4.00591	4.32281	3.7705	1.21765	0.388944
	1.74619		2.13338	3.2753	2.47356	0.88007	0.249164
	0.835169		1.84213	1.65114	1.69774	0.645767	0.0496342
	2.56882		0.85148		1.36353	0.821105	0.888231
	2.02998		0.878628		4.96982	1.05947	0.346235
	0.985359		8.74911		1.82429	1.07904	0.369688
	5.21158		5.00113		2.22314	0.226989	0.466044
	2.65788		3.15485		2.90174	1.53462	0.318934
	2.25695		10.3625		2.27404	2.28732	0.58041
	0.976387		2.6526		2.79878	1.95791	0.379637
	2.09377		0.311451		2.43561	2.77128	0.237078
	2.60322		4.30623		2.29206	2.05234	0.455979
			1.82132		1.94061	0.282151	0.414382
					3.08221	4.58854	0.499866
					2.43002	1.91635	0.103878
					3.22567	1.32664	0.290416
					2.41988	1.65395	0.370849
					2.67984	1.10487	0.442565
					2.48385	4.56404	0.339099
					1.41248	1.13345	0.0648572
					3.11517	2.56091	0.395447
					3.51109	1.71287	0.547749
					1.36383	1.40217	0.428015
					2.28539	2.46272	0.261385
					3.40895	1.58204	0.563133
					3.89637	1.04745	0.655544
					3.0916	1.34176	0.270788
					4.45127	2.30782	0.564449
					2.32044	2.05606	0.499581
					1.68352		0.560377
					1.01635		0.33849
					1.41696		0.729723
					3.38192		0.579725
					1.6448		0.204187
							0.536134
							0.166268
							0.185347
							0.357146
							0.635124
							0.697183
							0.858556
							0.523584
							0.118973
							0.611761
							0.237475
							0.373286

## Sheet: Nup170_KR
Nup170-GFP						1								2								3								4								5								6
Nup60K467R						Ic				Ir		Ibg		Ic				Ir		Ibg		Ic				Ir		Ibg		Ic				Ir		Ibg		Ic				Ir		Ibg		Ic
							511.193				282.863		151.047		866.009				285.774		133.936		621.507				256.575		143.129		473.547				357.342		148.145		365.881				238.015		146.891		409.97
							360.146								732.074								478.379								325.402								218.989								246.04
	average	median	SEM	n		Relative accumulation (RA)					131.815			Relative accumulation (RA)					151.838			Relative accumulation (RA)					113.446			Relative accumulation (RA)					209.197			Relative accumulation (RA)					91.1234			Relative accumulation (RA)
RA:	2.64575	2.47356	0.149631	41		2.7322								4.82141								4.2168								1.55548								2.40322								2.70525
	p-value
	3.12425e-13
						171122_TR81.1.1_Nup60KR_Nup170GFP_01_01Crop_1.tifGFP_x_lc	171122_TR81.1.1_Nup60KR_Nup170GFP_01_01Crop_1.tifGFP_y_lc	171122_TR81.1.1_Nup60KR_Nup170GFP_01_01Crop_1.tifmCh_x_cap	171122_TR81.1.1_Nup60KR_Nup170GFP_01_01Crop_1.tifmCh_y_cap	171122_TR81.1.1_Nup60KR_Nup170GFP_01_01Crop_1.tifGFP_x_lr	171122_TR81.1.1_Nup60KR_Nup170GFP_01_01Crop_1.tifGFP_y_lr	171122_TR81.1.1_Nup60KR_Nup170GFP_01_01Crop_1.tifGFP_x_bg	171122_TR81.1.1_Nup60KR_Nup170GFP_01_01Crop_1.tifGFP_y_bg	171122_TR81.1.1_Nup60KR_Nup170GFP_01_01Crop_2.tifGFP_x_lc	171122_TR81.1.1_Nup60KR_Nup170GFP_01_01Crop_2.tifGFP_y_lc	171122_TR81.1.1_Nup60KR_Nup170GFP_01_01Crop_2.tifmCh_x_cap	171122_TR81.1.1_Nup60KR_Nup170GFP_01_01Crop_2.tifmCh_y_cap	171122_TR81.1.1_Nup60KR_Nup170GFP_01_01Crop_2.tifGFP_x_lr	171122_TR81.1.1_Nup60KR_Nup170GFP_01_01Crop_2.tifGFP_y_lr	171122_TR81.1.1_Nup60KR_Nup170GFP_01_01Crop_2.tifGFP_x_bg	171122_TR81.1.1_Nup60KR_Nup170GFP_01_01Crop_2.tifGFP_y_bg	171122_TR81.1.1_Nup60KR_Nup170GFP_01_02Crop_1.tifGFP_x_lc	171122_TR81.1.1_Nup60KR_Nup170GFP_01_02Crop_1.tifGFP_y_lc	171122_TR81.1.1_Nup60KR_Nup170GFP_01_02Crop_1.tifmCh_x_cap	171122_TR81.1.1_Nup60KR_Nup170GFP_01_02Crop_1.tifmCh_y_cap	171122_TR81.1.1_Nup60KR_Nup170GFP_01_02Crop_1.tifGFP_x_lr	171122_TR81.1.1_Nup60KR_Nup170GFP_01_02Crop_1.tifGFP_y_lr	171122_TR81.1.1_Nup60KR_Nup170GFP_01_02Crop_1.tifGFP_x_bg	171122_TR81.1.1_Nup60KR_Nup170GFP_01_02Crop_1.tifGFP_y_bg	171122_TR81.1.1_Nup60KR_Nup170GFP_01_03Crop_1.tifGFP_x_lc	171122_TR81.1.1_Nup60KR_Nup170GFP_01_03Crop_1.tifGFP_y_lc	171122_TR81.1.1_Nup60KR_Nup170GFP_01_03Crop_1.tifmCh_x_cap	171122_TR81.1.1_Nup60KR_Nup170GFP_01_03Crop_1.tifmCh_y_cap	171122_TR81.1.1_Nup60KR_Nup170GFP_01_03Crop_1.tifGFP_x_lr	171122_TR81.1.1_Nup60KR_Nup170GFP_01_03Crop_1.tifGFP_y_lr	171122_TR81.1.1_Nup60KR_Nup170GFP_01_03Crop_1.tifGFP_x_bg	171122_TR81.1.1_Nup60KR_Nup170GFP_01_03Crop_1.tifGFP_y_bg	171122_TR81.1.1_Nup60KR_Nup170GFP_01_03Crop_2.tifGFP_x_lc	171122_TR81.1.1_Nup60KR_Nup170GFP_01_03Crop_2.tifGFP_y_lc	171122_TR81.1.1_Nup60KR_Nup170GFP_01_03Crop_2.tifmCh_x_cap	171122_TR81.1.1_Nup60KR_Nup170GFP_01_03Crop_2.tifmCh_y_cap	171122_TR81.1.1_Nup60KR_Nup170GFP_01_03Crop_2.tifGFP_x_lr	171122_TR81.1.1_Nup60KR_Nup170GFP_01_03Crop_2.tifGFP_y_lr	171122_TR81.1.1_Nup60KR_Nup170GFP_01_03Crop_2.tifGFP_x_bg	171122_TR81.1.1_Nup60KR_Nup170GFP_01_03Crop_2.tifGFP_y_bg	171122_TR81.1.1_Nup60KR_Nup170GFP_01_03Crop_3.tifGFP_x_lc	171122_TR81.1.1_Nup60KR_Nup170GFP_01_03Crop_3.tifGFP_y_lc	171122_TR81.1.1_Nup60KR_Nup170GFP_01_03Crop_3.tifmCh_x_cap	171122_TR81.1.1_Nup60KR_Nup170GFP_01_03Crop_3.tifmCh_y_cap
					1	0	279	0	96	0	285	0	169	0	285	0	301	0	248	0	139	0	536	0	339	0	217	0	149	0	279	0	54	0	469	0	162	0	247	0	47	0	234	0	155	0	491	0	177
					2	0.064	371.545	0.064	92.375	0.064	278.963	0.064	156.034	0.064	332.167	0.064	620.212	0.064	223.645	0.064	140.859	0.064	653.009	0.064	511.16	0.064	207.697	0.064	163.14	0.064	318.989	0.064	85.624	0.064	608.878	0.064	136.095	0.064	280.577	0.064	52.036	0.064	247.835	0.064	146.572	0.064	451.263	0.064	255.13
					3	0.128	472.562	0.128	102.123	0.128	283.931	0.128	151.364	0.128	494.997	0.128	1021.65	0.128	214.481	0.128	142.46	0.128	707.816	0.128	650.675	0.128	205.065	0.128	148.028	0.128	337.41	0.128	136.563	0.128	686.062	0.128	129.322	0.128	331.581	0.128	68.483	0.128	272.517	0.128	133.015	0.128	441.311	0.128	360.294
					4	0.192	547.761	0.192	150.729	0.192	271.542	0.192	155.152	0.192	766.925	0.192	1407.63	0.192	225.999	0.192	139.266	0.192	711.021	0.192	705.195	0.192	234.793	0.192	140.768	0.192	343.283	0.192	218.132	0.192	651.807	0.192	137.153	0.192	389.717	0.192	121.709	0.192	279.583	0.192	132.167	0.192	437.791	0.192	499.876
					5	0.256	614.071	0.256	290.793	0.256	256.74	0.256	154.929	0.256	983.833	0.256	1709.74	0.256	226.895	0.256	132.717	0.256	642.215	0.256	808.817	0.256	272.401	0.256	146.178	0.256	386.438	0.256	323.967	0.256	519.656	0.256	148.552	0.256	456.956	0.256	227.887	0.256	253.262	0.256	133.872	0.256	434.472	0.256	643.105
					6	0.32	623.014	0.32	638.979	0.32	232.04	0.32	146.906	0.32	1054.07	0.32	1944.6	0.32	244.427	0.32	127.521	0.32	559.4	0.32	1016.99	0.32	275.868	0.32	148.455	0.32	466.939	0.32	463.258	0.32	366.308	0.32	154.105	0.32	472.203	0.32	405.149	0.32	257.576	0.32	138.222	0.32	404.603	0.32	725.363
					7	0.384	617.727	0.384	1239.5	0.384	206.233	0.384	153.37	0.384	1058.15	0.384	2278.93	0.384	259.754	0.384	125.522	0.384	704.598	0.384	1337.16	0.384	294.569	0.384	141.547	0.384	550.405	0.384	575.629	0.384	271.336	0.384	150.092	0.384	499.194	0.384	626.205	0.384	260.164	0.384	142.599	0.384	352.86	0.384	808.732
					8	0.448	628.945	0.448	1978.17	0.448	212.508	0.448	155.359	0.448	1091.45	0.448	2514.26	0.448	287.147	0.448	121.213	0.448	838.728	0.448	1768.21	0.448	306.262	0.448	130.82	0.448	601.591	0.448	654.705	0.448	236.369	0.448	147.499	0.448	527.727	0.448	816.106	0.448	229.398	0.448	136.473	0.448	360.161	0.448	896.675
					9	0.512	612.494	0.512	2677.91	0.512	239.981	0.512	155.959	0.512	1079.99	0.512	2692.39	0.512	369.216	0.512	121.88	0.512	840.821	0.512	2191.03	0.512	293.993	0.512	131.711	0.512	584.136	0.512	780.754	0.512	234.595	0.512	136.095	0.512	621.772	0.512	966.15	0.512	222.102	0.512	131.585	0.512	395.07	0.512	988.07
					10	0.576	565.705	0.576	3105.14	0.576	272.316	0.576	154.98	0.576	1047.37	0.576	2762.07	0.576	437.458	0.576	122.525	0.576	835.394	0.576	2492.7	0.576	266.231	0.576	135.753	0.576	523.824	0.576	1019.94	0.576	239.301	0.576	128.913	0.576	693.274	0.576	1087.96	0.576	217.799	0.576	135.853	0.576	377.522	0.576	1036.85
					11	0.64	593.569	0.64	3267.05	0.64	286.885	0.64	151.198	0.64	1074.77	0.64	2676.81	0.64	464.124	0.64	124.45	0.64	799.16	0.64	2662.4	0.64	235.289	0.64	135.813	0.64	434.812	0.64	1343.69	0.64	243.848	0.64	137.851	0.64	656.511	0.64	1041.84	0.64	198.404	0.64	144.725	0.64	395.9	0.64	1081.71
					12	0.704	613.242	0.704	3141.81	0.704	288.372	0.704	140.018	0.704	1219.4	0.704	2672.14	0.704	472.059	0.704	135.208	0.704	720.315	0.704	2741.25	0.704	215.719	0.704	146.805	0.704	352.547	0.704	1724.2	0.704	255.455	0.704	137.567	0.704	597.32	0.704	1004.34	0.704	172.151	0.704	157.009	0.704	455.5	0.704	1098.43
					13	0.768	570.712	0.768	2869.58	0.768	294.302	0.768	134.339	0.768	1330.05	0.768	2806.79	0.768	476.67	0.768	134.059	0.768	694.681	0.768	2744.15	0.768	218.123	0.768	171.227	0.768	366.654	0.768	2005.68	0.768	278.04	0.768	130.646	0.768	532.144	0.768	931.66	0.768	174.525	0.768	153.836	0.768	498.8	0.768	1053.83
					14	0.832	485.56	0.832	2552	0.832	313.695	0.832	146.375	0.832	1310.39	0.832	2924.18	0.832	442.8	0.832	130.702	0.832	667.545	0.832	2569	0.832	229.863	0.832	159.393	0.832	485.095	0.832	2224.43	0.832	281.02	0.832	134.59	0.832	468.058	0.832	852.52	0.832	178.493	0.832	158.056	0.832	462.916	0.832	1031.45
					15	0.896	391.48	0.896	2265.05	0.896	343.667	0.896	144.767	0.896	1310.76	0.896	3022.94	0.896	380.914	0.896	134.129	0.896	644	0.896	2458.09	0.896	247.155	0.896	136.032	0.896	614.958	0.896	2324.13	0.896	271.604	0.896	148.432	0.896	414.432	0.896	903.763	0.896	181.436	0.896	151.456	0.896	406.345	0.896	1067.07
					16	0.96	342.86	0.96	1975.67	0.96	352.856	0.96	155.471	0.96	1313.62	0.96	3048.81	0.96	327.103	0.96	138.743	0.96	577.443	0.96	2332.16	0.96	256.733	0.96	131.222	0.96	695.999	0.96	2175.47	0.96	274.091	0.96	157.08	0.96	386.526	0.96	1014.87	0.96	190.139	0.96	161.511	0.96	371.785	0.96	1098.86
					17	1.024	360.04	1.024	1607.7	1.024	343.414	1.024	159.177	1.024	1198.76	1.024	2687.14	1.024	330.695	1.024	138.376	1.024	555.173	1.024	2205.52	1.024	232.659	1.024	133.4	1.024	750.272	1.024	1740.33	1.024	282.165	1.024	150.951	1.024	335.814	1.024	1119.62	1.024	195.85	1.024	161.316	1.024	350.623	1.024	1123.1
					18	NA	NA	1.088	1144.84	1.088	311.34	1.088	141.71	1.088	1096.14	1.088	2180.07	1.088	324.714	1.088	133.826	1.088	492.488	1.088	2044.7	1.088	203.64	1.088	131.841	1.088	686.078	1.088	1252.55	1.088	283.645	1.088	138.536	1.088	272.968	1.088	1203.43	1.088	204.749	1.088	151.318	1.088	327.1	1.088	1072.06
					19	NA	NA	1.152	725.755	1.152	275.285	1.152	154.744	1.152	964.931	NA	NA	1.152	329.498	1.152	133.354	1.152	430.654	1.152	1768.55	1.152	212.359	1.152	134.868	1.152	728.431	1.152	781.195	1.152	282.758	1.152	138.936	1.152	246.278	1.152	1165.73	1.152	231.022	1.152	141.815	1.152	305.301	1.152	920.874
					20	NA	NA	1.216	409.715	1.216	261.729	1.216	161.871	1.216	835.996	NA	NA	1.216	343.828	1.216	138.945	1.216	406.983	1.216	1579.95	1.216	244.933	1.216	131.719	1.216	715.302	1.216	439.621	1.216	286.199	1.216	137.493	1.216	237.647	1.216	1017.36	1.216	255.399	1.216	138.741	1.216	354.767	1.216	758.789
					21	NA	NA	1.28	220.806	1.28	281.533	1.28	161.052	1.28	905.388	NA	NA	1.28	349.99	1.28	145.377	1.28	505.731	1.28	1448.11	1.28	274.131	1.28	130.128	1.28	632.531	1.28	262.377	1.28	281.608	1.28	130.411	1.28	228.901	1.28	778.232	1.28	283.618	1.28	140.627	1.28	465.813	1.28	567.766
					22	NA	NA	NA	NA	1.344	338.668	1.344	157.727	1.344	948.746	NA	NA	1.344	350.81	1.344	147.271	1.344	700.796	1.344	1305.79	1.344	293.625	1.344	138.389	1.344	557.223	1.344	170.497	1.344	275.901	1.344	134.55	1.344	230.044	1.344	555.693	1.344	349.593	1.344	147.165	1.344	520.22	1.344	369.023
					23	NA	NA	NA	NA	1.408	389.483	1.408	163.619	1.408	864.588	NA	NA	1.408	353.839	1.408	141.595	1.408	780.247	1.408	1231.36	1.408	285.815	1.408	152.172	1.408	514.071	1.408	117.575	1.408	276.413	1.408	142.845	1.408	265.519	1.408	394.294	1.408	426.977	1.408	147.331	1.408	475.978	1.408	224.666
					24	NA	NA	NA	NA	1.472	377.227	1.472	178.332	1.472	691.893	NA	NA	1.472	348.892	1.472	141.092	1.472	712.929	1.472	1211.59	1.472	280.191	1.472	158.794	1.472	486.458	1.472	83.807	1.472	269.005	1.472	144.746	1.472	303.217	1.472	246.941	1.472	416.207	1.472	137.148	1.472	458.685	1.472	122.991
					25	NA	NA	NA	NA	1.536	334.213	1.536	159.531	1.536	535.368	NA	NA	1.536	355.485	1.536	145.076	1.536	531.36	1.536	1192.75	1.536	263.318	1.536	154.989	1.536	432.461	NA	NA	1.536	262.321	1.536	152.037	1.536	303.475	1.536	141.602	1.536	348.605	1.536	140.826	1.536	460.985	1.536	61.478
					26	NA	NA	NA	NA	1.6	302.37	1.6	149.233	1.6	410.39	NA	NA	1.6	372.222	1.6	142.286	1.6	442.46	1.6	1021.97	1.6	225.209	1.6	145.951	1.6	402.675	NA	NA	1.6	285.393	1.6	154.114	1.6	294.221	1.6	94.34	1.6	262.545	1.6	137.343	1.6	446.231	1.6	39.173
					27	NA	NA	NA	NA	1.664	273.806	1.664	151.41	1.664	328.608	NA	NA	1.664	380.968	1.664	138.913	1.664	432.26	1.664	626.841	1.664	200.089	1.664	135.922	1.664	392.549	NA	NA	1.664	310.69	1.664	148.483	1.664	300.232	1.664	72.115	1.664	210.76	1.664	136.266	1.664	379.496	1.664	44.767
					28	NA	NA	NA	NA	1.728	257.511	1.728	151.878	1.728	301.451	NA	NA	1.728	388.637	1.728	138.107	1.728	407.46	NA	NA	1.728	215.259	1.728	143.262	1.728	405.697	NA	NA	1.728	321.87	1.728	148.87	1.728	301.101	1.728	60.111	1.728	215.46	1.728	144.043	1.728	339.5	1.728	58.651
					29	NA	NA	NA	NA	1.792	255.772	1.792	148.101	1.792	279.081	NA	NA	1.792	390.594	1.792	138.076	1.792	452.12	NA	NA	1.792	252.891	1.792	147.579	1.792	412.91	NA	NA	1.792	324.655	1.792	151.913	1.792	279.727	1.792	59.283	1.792	210	1.792	153.825	1.792	321.619	1.792	72.791
					30	NA	NA	NA	NA	1.856	226.581	1.856	146.753	NA	NA	NA	NA	1.856	374.3	1.856	139.484	1.856	557.341	NA	NA	1.856	282.411	1.856	134.785	1.856	384.583	NA	NA	1.856	363.22	1.856	147.698	1.856	270.312	NA	NA	1.856	212.2	1.856	157.976	1.856	322.151	1.856	78.398
					31	NA	NA	NA	NA	1.92	250.352	1.92	145.254	NA	NA	NA	NA	1.92	377.8	1.92	144.673	1.92	679.649	NA	NA	1.92	295.341	1.92	141.861	1.92	350.222	NA	NA	1.92	429.66	1.92	147.568	1.92	279.36	NA	NA	1.92	221.502	1.92	151.375	1.92	366.169	NA	NA
					32	NA	NA	NA	NA	1.984	263.185	1.984	145.383	NA	NA	NA	NA	1.984	365.9	1.984	146.901	1.984	668.443	NA	NA	1.984	288.273	1.984	148.614	1.984	318.26	NA	NA	1.984	532.92	1.984	145.629	1.984	295.36	NA	NA	1.984	229.193	1.984	143.296	1.984	434.415	NA	NA
					33	NA	NA	NA	NA	2.048	248.58	2.048	146.982	NA	NA	NA	NA	2.048	363.7	2.048	142.22	NA	NA	NA	NA	2.048	288.107	2.048	139.5	2.048	295.112	NA	NA	2.048	601.64	2.048	134.783	2.048	312.07	NA	NA	2.048	227.384	2.048	134.14	2.048	457.693	NA	NA
					34	NA	NA	NA	NA	2.112	215.76	2.112	154.864	NA	NA	NA	NA	2.112	356.8	2.112	138.379	NA	NA	NA	NA	2.112	299.599	2.112	143.408	2.112	293.7	NA	NA	2.112	574.58	2.112	142.908	2.112	312.74	NA	NA	2.112	231.681	2.112	131.977	2.112	414.92	NA	NA
					35	NA	NA	NA	NA	2.176	190.413	2.176	155.334	NA	NA	NA	NA	2.176	320.176	2.176	135.783	NA	NA	NA	NA	2.176	280.236	2.176	143.954	NA	NA	NA	NA	2.176	482.86	2.176	152.465	2.176	278.34	NA	NA	2.176	230.174	2.176	144.932	NA	NA	NA	NA
					36	NA	NA	NA	NA	2.24	179.182	2.24	156.613	NA	NA	NA	NA	2.24	299.779	2.24	131.365	NA	NA	NA	NA	2.24	252.575	2.24	141.704	NA	NA	NA	NA	2.24	378.1	2.24	158.228	2.24	249.38	NA	NA	2.24	224.17	2.24	146.774	NA	NA	NA	NA
					37	NA	NA	NA	NA	2.304	207.935	2.304	155.246	NA	NA	NA	NA	2.304	262.34	2.304	129.866	NA	NA	NA	NA	2.304	231.528	2.304	140.481	NA	NA	NA	NA	2.304	363.889	2.304	158.725	NA	NA	NA	NA	2.304	224.975	2.304	148.178	NA	NA	NA	NA
					38	NA	NA	NA	NA	2.368	263.052	2.368	146.3	NA	NA	NA	NA	2.368	222.324	2.368	124.948	NA	NA	NA	NA	2.368	229.344	2.368	141.5	NA	NA	NA	NA	2.368	348.044	2.368	147.467	NA	NA	NA	NA	2.368	227.891	2.368	153.517	NA	NA	NA	NA
					39	NA	NA	NA	NA	2.432	338.638	2.432	147.429	NA	NA	NA	NA	2.432	186.678	2.432	115.748	NA	NA	NA	NA	2.432	257.261	2.432	156.329	NA	NA	NA	NA	2.432	311.58	2.432	141.883	NA	NA	NA	NA	2.432	231.955	2.432	151.593	NA	NA	NA	NA
					40	NA	NA	NA	NA	2.496	395.247	2.496	150.905	NA	NA	NA	NA	2.496	167.978	2.496	108.164	NA	NA	NA	NA	2.496	300.5	2.496	141.129	NA	NA	NA	NA	2.496	338.513	2.496	160.941	NA	NA	NA	NA	2.496	236.782	2.496	141.573	NA	NA	NA	NA
					41	NA	NA	NA	NA	2.56	397.062	2.56	134.59	NA	NA	NA	NA	2.56	173.523	2.56	109.473	NA	NA	NA	NA	2.56	332.512	2.56	136.167	NA	NA	NA	NA	2.56	370.02	2.56	173.812	NA	NA	NA	NA	2.56	243.819	2.56	150.71	NA	NA	NA	NA
					42	NA	NA	NA	NA	NA	NA	2.624	118.632	NA	NA	NA	NA	2.624	183.109	2.624	122.684	NA	NA	NA	NA	2.624	324.141	2.624	148.881	NA	NA	NA	NA	2.624	381.77	2.624	162.861	NA	NA	NA	NA	2.624	227.13	2.624	168.109	NA	NA	NA	NA
					43	NA	NA	NA	NA	NA	NA	2.688	123.256	NA	NA	NA	NA	2.688	175.032	2.688	134.506	NA	NA	NA	NA	2.688	302.741	2.688	155.439	NA	NA	NA	NA	2.688	371.015	2.688	146.894	NA	NA	NA	NA	2.688	221.536	2.688	170.684	NA	NA	NA	NA
					44	NA	NA	NA	NA	NA	NA	2.752	140.86	NA	NA	NA	NA	2.752	161.488	2.752	137.265	NA	NA	NA	NA	2.752	310.633	2.752	150.227	NA	NA	NA	NA	2.752	409.553	2.752	142.006	NA	NA	NA	NA	2.752	216.789	2.752	158.121	NA	NA	NA	NA
					45	NA	NA	NA	NA	NA	NA	2.816	145.583	NA	NA	NA	NA	2.816	170.748	2.816	141.431	NA	NA	NA	NA	2.816	298.573	2.816	135.201	NA	NA	NA	NA	2.816	419.506	2.816	154.791	NA	NA	NA	NA	2.816	199.621	2.816	154.504	NA	NA	NA	NA
					46	NA	NA	NA	NA	NA	NA	2.88	141.628	NA	NA	NA	NA	2.88	186.556	2.88	147.146	NA	NA	NA	NA	2.88	290.034	2.88	132.426	NA	NA	NA	NA	2.88	405.628	2.88	157.176	NA	NA	NA	NA	2.88	196.405	2.88	160.978	NA	NA	NA	NA
					47	NA	NA	NA	NA	NA	NA	2.944	135.067	NA	NA	NA	NA	2.944	187.5	2.944	149.37	NA	NA	NA	NA	2.944	297.294	2.944	145.377	NA	NA	NA	NA	2.944	364.741	2.944	157.653	NA	NA	NA	NA	2.944	222.608	2.944	154.069	NA	NA	NA	NA
					48	NA	NA	NA	NA	NA	NA	3.008	126.709	NA	NA	NA	NA	3.008	176.25	3.008	143.522	NA	NA	NA	NA	3.008	254.545	3.008	152.685	NA	NA	NA	NA	3.008	356.489	3.008	150.755	NA	NA	NA	NA	3.008	253.139	3.008	145.116	NA	NA	NA	NA
					49	NA	NA	NA	NA	NA	NA	3.072	131.802	NA	NA	NA	NA	3.072	183.75	3.072	142.718	NA	NA	NA	NA	3.072	226.846	3.072	148.18	NA	NA	NA	NA	3.072	396.508	3.072	143.588	NA	NA	NA	NA	3.072	272.901	3.072	147.01	NA	NA	NA	NA
					50	NA	NA	NA	NA	NA	NA	3.136	150.264	NA	NA	NA	NA	3.136	221.25	3.136	137.18	NA	NA	NA	NA	3.136	264.452	3.136	155.822	NA	NA	NA	NA	3.136	423.329	3.136	148.208	NA	NA	NA	NA	3.136	274.34	3.136	150.47	NA	NA	NA	NA
					51	NA	NA	NA	NA	NA	NA	3.2	159.181	NA	NA	NA	NA	3.2	248	3.2	123.754	NA	NA	NA	NA	3.2	347.518	3.2	157.406	NA	NA	NA	NA	3.2	415.417	3.2	145.609	NA	NA	NA	NA	3.2	239.384	3.2	146.661	NA	NA	NA	NA
					52	NA	NA	NA	NA	NA	NA	3.264	151.751	NA	NA	NA	NA	3.264	250	3.264	110.868	NA	NA	NA	NA	3.264	399.447	3.264	142.945	NA	NA	NA	NA	3.264	383.087	3.264	139.209	NA	NA	NA	NA	3.264	197.306	3.264	136.877	NA	NA	NA	NA
					53	NA	NA	NA	NA	NA	NA	3.328	144.39	NA	NA	NA	NA	3.328	230.25	3.328	106.875	NA	NA	NA	NA	3.328	374.519	3.328	132.127	NA	NA	NA	NA	3.328	344.243	3.328	149.817	NA	NA	NA	NA	3.328	171.73	NA	NA	NA	NA	NA	NA
					54	NA	NA	NA	NA	NA	NA	3.392	148.255	NA	NA	NA	NA	3.392	215.652	3.392	111.852	NA	NA	NA	NA	3.392	329.713	3.392	142.562	NA	NA	NA	NA	3.392	316.544	3.392	155.943	NA	NA	NA	NA	NA	NA	NA	NA	NA	NA	NA	NA
					55	NA	NA	NA	NA	NA	NA	3.456	157.959	NA	NA	NA	NA	3.456	238.665	3.456	114.754	NA	NA	NA	NA	3.456	283.121	3.456	144.659	NA	NA	NA	NA	3.456	298.095	3.456	163.339	NA	NA	NA	NA	NA	NA	NA	NA	NA	NA	NA	NA
					56	NA	NA	NA	NA	NA	NA	3.52	156.883	NA	NA	NA	NA	3.52	229.166	3.52	118.747	NA	NA	NA	NA	3.52	244.788	3.52	130.167	NA	NA	NA	NA	3.52	283.74	3.52	161.868	NA	NA	NA	NA	NA	NA	NA	NA	NA	NA	NA	NA
					57	NA	NA	NA	NA	NA	NA	3.584	150.89	NA	NA	NA	NA	3.584	221.082	3.584	130.782	NA	NA	NA	NA	3.584	225.325	3.584	128.188	NA	NA	NA	NA	3.584	302.059	3.584	160.603	NA	NA	NA	NA	NA	NA	NA	NA	NA	NA	NA	NA
					58	NA	NA	NA	NA	NA	NA	3.648	155.206	NA	NA	NA	NA	3.648	202.395	3.648	139.107	NA	NA	NA	NA	3.648	207.99	3.648	138.117	NA	NA	NA	NA	3.648	325.72	3.648	157.94	NA	NA	NA	NA	NA	NA	NA	NA	NA	NA	NA	NA
					59	NA	NA	NA	NA	NA	NA	3.712	157.41	NA	NA	NA	NA	3.712	182.126	3.712	130.563	NA	NA	NA	NA	3.712	180.964	3.712	135.991	NA	NA	NA	NA	3.712	309.76	3.712	159.487	NA	NA	NA	NA	NA	NA	NA	NA	NA	NA	NA	NA
					60	NA	NA	NA	NA	NA	NA	3.776	149.27	NA	NA	NA	NA	3.776	182.301	3.776	124.217	NA	NA	NA	NA	3.776	168.104	3.776	138.521	NA	NA	NA	NA	3.776	293.6	3.776	161.475	NA	NA	NA	NA	NA	NA	NA	NA	NA	NA	NA	NA
					61	NA	NA	NA	NA	NA	NA	3.84	149.59	NA	NA	NA	NA	3.84	196.638	3.84	118.232	NA	NA	NA	NA	3.84	173.691	3.84	151.41	NA	NA	NA	NA	3.84	298.12	3.84	155.653	NA	NA	NA	NA	NA	NA	NA	NA	NA	NA	NA	NA
					62	NA	NA	NA	NA	NA	NA	3.904	147.243	NA	NA	NA	NA	3.904	213.95	3.904	109.327	NA	NA	NA	NA	3.904	175.839	3.904	146.266	NA	NA	NA	NA	3.904	327.72	NA	NA	NA	NA	NA	NA	NA	NA	NA	NA	NA	NA	NA	NA
					63	NA	NA	NA	NA	NA	NA	3.968	140.569	NA	NA	NA	NA	3.968	234.595	3.968	114.391	NA	NA	NA	NA	3.968	167.415	3.968	140.892	NA	NA	NA	NA	3.968	360.88	NA	NA	NA	NA	NA	NA	NA	NA	NA	NA	NA	NA	NA	NA
					64	NA	NA	NA	NA	NA	NA	4.032	135.156	NA	NA	NA	NA	4.032	265.838	4.032	127.795	NA	NA	NA	NA	4.032	173.612	4.032	142.419	NA	NA	NA	NA	NA	NA	NA	NA	NA	NA	NA	NA	NA	NA	NA	NA	NA	NA	NA	NA
					65	NA	NA	NA	NA	NA	NA	4.096	144.588	NA	NA	NA	NA	4.096	293.324	4.096	127.825	NA	NA	NA	NA	4.096	195.341	NA	NA	NA	NA	NA	NA	NA	NA	NA	NA	NA	NA	NA	NA	NA	NA	NA	NA	NA	NA	NA	NA
					66	NA	NA	NA	NA	NA	NA	4.16	160.203	NA	NA	NA	NA	4.16	321.799	4.16	126.546	NA	NA	NA	NA	4.16	229.936	NA	NA	NA	NA	NA	NA	NA	NA	NA	NA	NA	NA	NA	NA	NA	NA	NA	NA	NA	NA	NA	NA
					67	NA	NA	NA	NA	NA	NA	4.224	158.809	NA	NA	NA	NA	4.224	332.563	4.224	127.198	NA	NA	NA	NA	4.224	245.35	NA	NA	NA	NA	NA	NA	NA	NA	NA	NA	NA	NA	NA	NA	NA	NA	NA	NA	NA	NA	NA	NA
					68	NA	NA	NA	NA	NA	NA	4.288	153.136	NA	NA	NA	NA	4.288	306.655	4.288	134.074	NA	NA	NA	NA	NA	NA	NA	NA	NA	NA	NA	NA	NA	NA	NA	NA	NA	NA	NA	NA	NA	NA	NA	NA	NA	NA	NA	NA
					69	NA	NA	NA	NA	NA	NA	4.352	162.93	NA	NA	NA	NA	4.352	283.645	4.352	142.352	NA	NA	NA	NA	NA	NA	NA	NA	NA	NA	NA	NA	NA	NA	NA	NA	NA	NA	NA	NA	NA	NA	NA	NA	NA	NA	NA	NA
					70	NA	NA	NA	NA	NA	NA	4.416	165.279	NA	NA	NA	NA	4.416	276.517	4.416	140.906	NA	NA	NA	NA	NA	NA	NA	NA	NA	NA	NA	NA	NA	NA	NA	NA	NA	NA	NA	NA	NA	NA	NA	NA	NA	NA	NA	NA
					71	NA	NA	NA	NA	NA	NA	4.48	166.293	NA	NA	NA	NA	4.48	288.285	4.48	137.521	NA	NA	NA	NA	NA	NA	NA	NA	NA	NA	NA	NA	NA	NA	NA	NA	NA	NA	NA	NA	NA	NA	NA	NA	NA	NA	NA	NA
					72	NA	NA	NA	NA	NA	NA	4.544	159.179	NA	NA	NA	NA	4.544	324.422	4.544	140.607	NA	NA	NA	NA	NA	NA	NA	NA	NA	NA	NA	NA	NA	NA	NA	NA	NA	NA	NA	NA	NA	NA	NA	NA	NA	NA	NA	NA
					73	NA	NA	NA	NA	NA	NA	4.608	162.376	NA	NA	NA	NA	NA	NA	4.608	139.376	NA	NA	NA	NA	NA	NA	NA	NA	NA	NA	NA	NA	NA	NA	NA	NA	NA	NA	NA	NA	NA	NA	NA	NA	NA	NA	NA	NA
					74	NA	NA	NA	NA	NA	NA	4.672	163.185	NA	NA	NA	NA	NA	NA	4.672	134.313	NA	NA	NA	NA	NA	NA	NA	NA	NA	NA	NA	NA	NA	NA	NA	NA	NA	NA	NA	NA	NA	NA	NA	NA	NA	NA	NA	NA
					75	NA	NA	NA	NA	NA	NA	4.736	165.768	NA	NA	NA	NA	NA	NA	4.736	134.325	NA	NA	NA	NA	NA	NA	NA	NA	NA	NA	NA	NA	NA	NA	NA	NA	NA	NA	NA	NA	NA	NA	NA	NA	NA	NA	NA	NA
					76	NA	NA	NA	NA	NA	NA	NA	NA	NA	NA	NA	NA	NA	NA	4.8	144.799	NA	NA	NA	NA	NA	NA	NA	NA	NA	NA	NA	NA	NA	NA	NA	NA	NA	NA	NA	NA	NA	NA	NA	NA	NA	NA	NA	NA
					77	NA	NA	NA	NA	NA	NA	NA	NA	NA	NA	NA	NA	NA	NA	4.864	162.127	NA	NA	NA	NA	NA	NA	NA	NA	NA	NA	NA	NA	NA	NA	NA	NA	NA	NA	NA	NA	NA	NA	NA	NA	NA	NA	NA	NA
					78	NA	NA	NA	NA	NA	NA	NA	NA	NA	NA	NA	NA	NA	NA	4.928	158.478	NA	NA	NA	NA	NA	NA	NA	NA	NA	NA	NA	NA	NA	NA	NA	NA	NA	NA	NA	NA	NA	NA	NA	NA	NA	NA	NA	NA
					79	NA	NA	NA	NA	NA	NA	NA	NA	NA	NA	NA	NA	NA	NA	4.992	156.451	NA	NA	NA	NA	NA	NA	NA	NA	NA	NA	NA	NA	NA	NA	NA	NA	NA	NA	NA	NA	NA	NA	NA	NA	NA	NA	NA	NA
					80	NA	NA	NA	NA	NA	NA	NA	NA	NA	NA	NA	NA	NA	NA	5.056	156.892	NA	NA	NA	NA	NA	NA	NA	NA	NA	NA	NA	NA	NA	NA	NA	NA	NA	NA	NA	NA	NA	NA	NA	NA	NA	NA	NA	NA
					81	NA	NA	NA	NA	NA	NA	NA	NA	NA	NA	NA	NA	NA	NA	5.12	152.318	NA	NA	NA	NA	NA	NA	NA	NA	NA	NA	NA	NA	NA	NA	NA	NA	NA	NA	NA	NA	NA	NA	NA	NA	NA	NA	NA	NA
					82	NA	NA	NA	NA	NA	NA	NA	NA	NA	NA	NA	NA	NA	NA	5.184	136.583	NA	NA	NA	NA	NA	NA	NA	NA	NA	NA	NA	NA	NA	NA	NA	NA	NA	NA	NA	NA	NA	NA	NA	NA	NA	NA	NA	NA
					83	NA	NA	NA	NA	NA	NA	NA	NA	NA	NA	NA	NA	NA	NA	5.248	131.033	NA	NA	NA	NA	NA	NA	NA	NA	NA	NA	NA	NA	NA	NA	NA	NA	NA	NA	NA	NA	NA	NA	NA	NA	NA	NA	NA	NA
					84	NA	NA	NA	NA	NA	NA	NA	NA	NA	NA	NA	NA	NA	NA	5.312	128.254	NA	NA	NA	NA	NA	NA	NA	NA	NA	NA	NA	NA	NA	NA	NA	NA	NA	NA	NA	NA	NA	NA	NA	NA	NA	NA	NA	NA
					85	NA	NA	NA	NA	NA	NA	NA	NA	NA	NA	NA	NA	NA	NA	5.376	126.405	NA	NA	NA	NA	NA	NA	NA	NA	NA	NA	NA	NA	NA	NA	NA	NA	NA	NA	NA	NA	NA	NA	NA	NA	NA	NA	NA	NA
					86	NA	NA	NA	NA	NA	NA	NA	NA	NA	NA	NA	NA	NA	NA	5.44	143.438	NA	NA	NA	NA	NA	NA	NA	NA	NA	NA	NA	NA	NA	NA	NA	NA	NA	NA	NA	NA	NA	NA	NA	NA	NA	NA	NA	NA
					87	NA	NA	NA	NA	NA	NA	NA	NA	NA	NA	NA	NA	NA	NA	NA	NA	NA	NA	NA	NA	NA	NA	NA	NA	NA	NA	NA	NA	NA	NA	NA	NA	NA	NA	NA	NA	NA	NA	NA	NA	NA	NA	NA	NA
					88	NA	NA	NA	NA	NA	NA	NA	NA	NA	NA	NA	NA	NA	NA	NA	NA	NA	NA	NA	NA	NA	NA	NA	NA	NA	NA	NA	NA	NA	NA	NA	NA	NA	NA	NA	NA	NA	NA	NA	NA	NA	NA	NA	NA
					89	NA	NA	NA	NA	NA	NA	NA	NA	NA	NA	NA	NA	NA	NA	NA	NA	NA	NA	NA	NA	NA	NA	NA	NA	NA	NA	NA	NA	NA	NA	NA	NA	NA	NA	NA	NA	NA	NA	NA	NA	NA	NA	NA	NA
					90	NA	NA	NA	NA	NA	NA	NA	NA	NA	NA	NA	NA	NA	NA	NA	NA	NA	NA	NA	NA	NA	NA	NA	NA	NA	NA	NA	NA	NA	NA	NA	NA	NA	NA	NA	NA	NA	NA	NA	NA	NA	NA	NA	NA
					91	NA	NA	NA	NA	NA	NA	NA	NA	NA	NA	NA	NA	NA	NA	NA	NA	NA	NA	NA	NA	NA	NA	NA	NA	NA	NA	NA	NA	NA	NA	NA	NA	NA	NA	NA	NA	NA	NA	NA	NA	NA	NA	NA	NA
					92	NA	NA	NA	NA	NA	NA	NA	NA	NA	NA	NA	NA	NA	NA	NA	NA	NA	NA	NA	NA	NA	NA	NA	NA	NA	NA	NA	NA	NA	NA	NA	NA	NA	NA	NA	NA	NA	NA	NA	NA	NA	NA	NA	NA
					93	NA	NA	NA	NA	NA	NA	NA	NA	NA	NA	NA	NA	NA	NA	NA	NA	NA	NA	NA	NA	NA	NA	NA	NA	NA	NA	NA	NA	NA	NA	NA	NA	NA	NA	NA	NA	NA	NA	NA	NA	NA	NA	NA	NA
					94	NA	NA	NA	NA	NA	NA	NA	NA	NA	NA	NA	NA	NA	NA	NA	NA	NA	NA	NA	NA	NA	NA	NA	NA	NA	NA	NA	NA	NA	NA	NA	NA	NA	NA	NA	NA	NA	NA	NA	NA	NA	NA	NA	NA
					95	NA	NA	NA	NA	NA	NA	NA	NA	NA	NA	NA	NA	NA	NA	NA	NA	NA	NA	NA	NA	NA	NA	NA	NA	NA	NA	NA	NA	NA	NA	NA	NA	NA	NA	NA	NA	NA	NA	NA	NA	NA	NA	NA	NA
					96	NA	NA	NA	NA	NA	NA	NA	NA	NA	NA	NA	NA	NA	NA	NA	NA	NA	NA	NA	NA	NA	NA	NA	NA	NA	NA	NA	NA	NA	NA	NA	NA	NA	NA	NA	NA	NA	NA	NA	NA	NA	NA	NA	NA
					97	NA	NA	NA	NA	NA	NA	NA	NA	NA	NA	NA	NA	NA	NA	NA	NA	NA	NA	NA	NA	NA	NA	NA	NA	NA	NA	NA	NA	NA	NA	NA	NA	NA	NA	NA	NA	NA	NA	NA	NA	NA	NA	NA	NA
					98	NA	NA	NA	NA	NA	NA	NA	NA	NA	NA	NA	NA	NA	NA	NA	NA	NA	NA	NA	NA	NA	NA	NA	NA	NA	NA	NA	NA	NA	NA	NA	NA	NA	NA	NA	NA	NA	NA	NA	NA	NA	NA	NA	NA
					99	NA	NA	NA	NA	NA	NA	NA	NA	NA	NA	NA	NA	NA	NA	NA	NA	NA	NA	NA	NA	NA	NA	NA	NA	NA	NA	NA	NA	NA	NA	NA	NA	NA	NA	NA	NA	NA	NA	NA	NA	NA	NA	NA	NA
					100	NA	NA	NA	NA	NA	NA	NA	NA	NA	NA	NA	NA	NA	NA	NA	NA	NA	NA	NA	NA	NA	NA	NA	NA	NA	NA	NA	NA	NA	NA	NA	NA	NA	NA	NA	NA	NA	NA	NA	NA	NA	NA	NA	NA
					101	NA	NA	NA	NA	NA	NA	NA	NA	NA	NA	NA	NA	NA	NA	NA	NA	NA	NA	NA	NA	NA	NA	NA	NA	NA	NA	NA	NA	NA	NA	NA	NA	NA	NA	NA	NA	NA	NA	NA	NA	NA	NA	NA	NA
					102	NA	NA	NA	NA	NA	NA	NA	NA	NA	NA	NA	NA	NA	NA	NA	NA	NA	NA	NA	NA	NA	NA	NA	NA	NA	NA	NA	NA	NA	NA	NA	NA	NA	NA	NA	NA	NA	NA	NA	NA	NA	NA	NA	NA
					103	NA	NA	NA	NA	NA	NA	NA	NA	NA	NA	NA	NA	NA	NA	NA	NA	NA	NA	NA	NA	NA	NA	NA	NA	NA	NA	NA	NA	NA	NA	NA	NA	NA	NA	NA	NA	NA	NA	NA	NA	NA	NA	NA	NA
					104	NA	NA	NA	NA	NA	NA	NA	NA	NA	NA	NA	NA	NA	NA	NA	NA	NA	NA	NA	NA	NA	NA	NA	NA	NA	NA	NA	NA	NA	NA	NA	NA	NA	NA	NA	NA	NA	NA	NA	NA	NA	NA	NA	NA
					105	NA	NA	NA	NA	NA	NA	NA	NA	NA	NA	NA	NA	NA	NA	NA	NA	NA	NA	NA	NA	NA	NA	NA	NA	NA	NA	NA	NA	NA	NA	NA	NA	NA	NA	NA	NA	NA	NA	NA	NA	NA	NA	NA	NA
					106	NA	NA	NA	NA	NA	NA	NA	NA	NA	NA	NA	NA	NA	NA	NA	NA	NA	NA	NA	NA	NA	NA	NA	NA	NA	NA	NA	NA	NA	NA	NA	NA	NA	NA	NA	NA	NA	NA	NA	NA	NA	NA	NA	NA
					107	NA	NA	NA	NA	NA	NA	NA	NA	NA	NA	NA	NA	NA	NA	NA	NA	NA	NA	NA	NA	NA	NA	NA	NA	NA	NA	NA	NA	NA	NA	NA	NA	NA	NA	NA	NA	NA	NA	NA	NA	NA	NA	NA	NA
					108	NA	NA	NA	NA	NA	NA	NA	NA	NA	NA	NA	NA	NA	NA	NA	NA	NA	NA	NA	NA	NA	NA	NA	NA	NA	NA	NA	NA	NA	NA	NA	NA	NA	NA	NA	NA	NA	NA	NA	NA	NA	NA	NA	NA
					109	NA	NA	NA	NA	NA	NA	NA	NA	NA	NA	NA	NA	NA	NA	NA	NA	NA	NA	NA	NA	NA	NA	NA	NA	NA	NA	NA	NA	NA	NA	NA	NA	NA	NA	NA	NA	NA	NA	NA	NA	NA	NA	NA	NA
					110	NA	NA	NA	NA	NA	NA	NA	NA	NA	NA	NA	NA	NA	NA	NA	NA	NA	NA	NA	NA	NA	NA	NA	NA	NA	NA	NA	NA	NA	NA	NA	NA	NA	NA	NA	NA	NA	NA	NA	NA	NA	NA	NA	NA
					111	NA	NA	NA	NA	NA	NA	NA	NA	NA	NA	NA	NA	NA	NA	NA	NA	NA	NA	NA	NA	NA	NA	NA	NA	NA	NA	NA	NA	NA	NA	NA	NA	NA	NA	NA	NA	NA	NA	NA	NA	NA	NA	NA	NA
					112	NA	NA	NA	NA	NA	NA	NA	NA	NA	NA	NA	NA	NA	NA	NA	NA	NA	NA	NA	NA	NA	NA	NA	NA	NA	NA	NA	NA	NA	NA	NA	NA	NA	NA	NA	NA	NA	NA	NA	NA	NA	NA	NA	NA
					113	NA	NA	NA	NA	NA	NA	NA	NA	NA	NA	NA	NA	NA	NA	NA	NA	NA	NA	NA	NA	NA	NA	NA	NA	NA	NA	NA	NA	NA	NA	NA	NA	NA	NA	NA	NA	NA	NA	NA	NA	NA	NA	NA	NA
					114	NA	NA	NA	NA	NA	NA	NA	NA	NA	NA	NA	NA	NA	NA	NA	NA	NA	NA	NA	NA	NA	NA	NA	NA	NA	NA	NA	NA	NA	NA	NA	NA	NA	NA	NA	NA	NA	NA	NA	NA	NA	NA	NA	NA
					115	NA	NA	NA	NA	NA	NA	NA	NA	NA	NA	NA	NA	NA	NA	NA	NA	NA	NA	NA	NA	NA	NA	NA	NA	NA	NA	NA	NA	NA	NA	NA	NA	NA	NA	NA	NA	NA	NA	NA	NA	NA	NA	NA	NA
					116	NA	NA	NA	NA	NA	NA	NA	NA	NA	NA	NA	NA	NA	NA	NA	NA	NA	NA	NA	NA	NA	NA	NA	NA	NA	NA	NA	NA	NA	NA	NA	NA	NA	NA	NA	NA	NA	NA	NA	NA	NA	NA	NA	NA
					117	NA	NA	NA	NA	NA	NA	NA	NA	NA	NA	NA	NA	NA	NA	NA	NA	NA	NA	NA	NA	NA	NA	NA	NA	NA	NA	NA	NA	NA	NA	NA	NA	NA	NA	NA	NA	NA	NA	NA	NA	NA	NA	NA	NA
					118	NA	NA	NA	NA	NA	NA	NA	NA	NA	NA	NA	NA	NA	NA	NA	NA	NA	NA	NA	NA	NA	NA	NA	NA	NA	NA	NA	NA	NA	NA	NA	NA	NA	NA	NA	NA	NA	NA	NA	NA	NA	NA	NA	NA
					119	NA	NA	NA	NA	NA	NA	NA	NA	NA	NA	NA	NA	NA	NA	NA	NA	NA	NA	NA	NA	NA	NA	NA	NA	NA	NA	NA	NA	NA	NA	NA	NA	NA	NA	NA	NA	NA	NA	NA	NA	NA	NA	NA	NA
					120	NA	NA	NA	NA	NA	NA	NA	NA	NA	NA	NA	NA	NA	NA	NA	NA	NA	NA	NA	NA	NA	NA	NA	NA	NA	NA	NA	NA	NA	NA	NA	NA	NA	NA	NA	NA	NA	NA	NA	NA	NA	NA	NA	NA
					121	NA	NA	NA	NA	NA	NA	NA	NA	NA	NA	NA	NA	NA	NA	NA	NA	NA	NA	NA	NA	NA	NA	NA	NA	NA	NA	NA	NA	NA	NA	NA	NA	NA	NA	NA	NA	NA	NA	NA	NA	NA	NA	NA	NA
					122	NA	NA	NA	NA	NA	NA	NA	NA	NA	NA	NA	NA	NA	NA	NA	NA	NA	NA	NA	NA	NA	NA	NA	NA	NA	NA	NA	NA	NA	NA	NA	NA	NA	NA	NA	NA	NA	NA	NA	NA	NA	NA	NA	NA
					123	NA	NA	NA	NA	NA	NA	NA	NA	NA	NA	NA	NA	NA	NA	NA	NA	NA	NA	NA	NA	NA	NA	NA	NA	NA	NA	NA	NA	NA	NA	NA	NA	NA	NA	NA	NA	NA	NA	NA	NA	NA	NA	NA	NA
					124	NA	NA	NA	NA	NA	NA	NA	NA	NA	NA	NA	NA	NA	NA	NA	NA	NA	NA	NA	NA	NA	NA	NA	NA	NA	NA	NA	NA	NA	NA	NA	NA	NA	NA	NA	NA	NA	NA	NA	NA	NA	NA	NA	NA
					125	NA	NA	NA	NA	NA	NA	NA	NA	NA	NA	NA	NA	NA	NA	NA	NA	NA	NA	NA	NA	NA	NA	NA	NA	NA	NA	NA	NA	NA	NA	NA	NA	NA	NA	NA	NA	NA	NA	NA	NA	NA	NA	NA	NA
					126	NA	NA	NA	NA	NA	NA	NA	NA	NA	NA	NA	NA	NA	NA	NA	NA	NA	NA	NA	NA	NA	NA	NA	NA	NA	NA	NA	NA	NA	NA	NA	NA	NA	NA	NA	NA	NA	NA	NA	NA	NA	NA	NA	NA
					127	NA	NA	NA	NA	NA	NA	NA	NA	NA	NA	NA	NA	NA	NA	NA	NA	NA	NA	NA	NA	NA	NA	NA	NA	NA	NA	NA	NA	NA	NA	NA	NA	NA	NA	NA	NA	NA	NA	NA	NA	NA	NA	NA	NA
					128	NA	NA	NA	NA	NA	NA	NA	NA	NA	NA	NA	NA	NA	NA	NA	NA	NA	NA	NA	NA	NA	NA	NA	NA	NA	NA	NA	NA	NA	NA	NA	NA	NA	NA	NA	NA	NA	NA	NA	NA	NA	NA	NA	NA
					129	NA	NA	NA	NA	NA	NA	NA	NA	NA	NA	NA	NA	NA	NA	NA	NA	NA	NA	NA	NA	NA	NA	NA	NA	NA	NA	NA	NA	NA	NA	NA	NA	NA	NA	NA	NA	NA	NA	NA	NA	NA	NA	NA	NA
					130	NA	NA	NA	NA	NA	NA	NA	NA	NA	NA	NA	NA	NA	NA	NA	NA	NA	NA	NA	NA	NA	NA	NA	NA	NA	NA	NA	NA	NA	NA	NA	NA	NA	NA	NA	NA	NA	NA	NA	NA	NA	NA	NA	NA
					131	NA	NA	NA	NA	NA	NA	NA	NA	NA	NA	NA	NA	NA	NA	NA	NA	NA	NA	NA	NA	NA	NA	NA	NA	NA	NA	NA	NA	NA	NA	NA	NA	NA	NA	NA	NA	NA	NA	NA	NA	NA	NA	NA	NA
					132	NA	NA	NA	NA	NA	NA	NA	NA	NA	NA	NA	NA	NA	NA	NA	NA	NA	NA	NA	NA	NA	NA	NA	NA	NA	NA	NA	NA	NA	NA	NA	NA	NA	NA	NA	NA	NA	NA	NA	NA	NA	NA	NA	NA
					133	NA	NA	NA	NA	NA	NA	NA	NA	NA	NA	NA	NA	NA	NA	NA	NA	NA	NA	NA	NA	NA	NA	NA	NA	NA	NA	NA	NA	NA	NA	NA	NA	NA	NA	NA	NA	NA	NA	NA	NA	NA	NA	NA	NA
					134	NA	NA	NA	NA	NA	NA	NA	NA	NA	NA	NA	NA	NA	NA	NA	NA	NA	NA	NA	NA	NA	NA	NA	NA	NA	NA	NA	NA	NA	NA	NA	NA	NA	NA	NA	NA	NA	NA	NA	NA	NA	NA	NA	NA
					135	NA	NA	NA	NA	NA	NA	NA	NA	NA	NA	NA	NA	NA	NA	NA	NA	NA	NA	NA	NA	NA	NA	NA	NA	NA	NA	NA	NA	NA	NA	NA	NA	NA	NA	NA	NA	NA	NA	NA	NA	NA	NA	NA	NA
					136	NA	NA	NA	NA	NA	NA	NA	NA	NA	NA	NA	NA	NA	NA	NA	NA	NA	NA	NA	NA	NA	NA	NA	NA	NA	NA	NA	NA	NA	NA	NA	NA	NA	NA	NA	NA	NA	NA	NA	NA	NA	NA	NA	NA
					137	NA	NA	NA	NA	NA	NA	NA	NA	NA	NA	NA	NA	NA	NA	NA	NA	NA	NA	NA	NA	NA	NA	NA	NA	NA	NA	NA	NA	NA	NA	NA	NA	NA	NA	NA	NA	NA	NA	NA	NA	NA	NA	NA	NA
					138	NA	NA	NA	NA	NA	NA	NA	NA	NA	NA	NA	NA	NA	NA	NA	NA	NA	NA	NA	NA	NA	NA	NA	NA	NA	NA	NA	NA	NA	NA	NA	NA	NA	NA	NA	NA	NA	NA	NA	NA	NA	NA	NA	NA
					139	NA	NA	NA	NA	NA	NA	NA	NA	NA	NA	NA	NA	NA	NA	NA	NA	NA	NA	NA	NA	NA	NA	NA	NA	NA	NA	NA	NA	NA	NA	NA	NA	NA	NA	NA	NA	NA	NA	NA	NA	NA	NA	NA	NA
					140	NA	NA	NA	NA	NA	NA	NA	NA	NA	NA	NA	NA	NA	NA	NA	NA	NA	NA	NA	NA	NA	NA	NA	NA	NA	NA	NA	NA	NA	NA	NA	NA	NA	NA	NA	NA	NA	NA	NA	NA	NA	NA	NA	NA
					141	NA	NA	NA	NA	NA	NA	NA	NA	NA	NA	NA	NA	NA	NA	NA	NA	NA	NA	NA	NA	NA	NA	NA	NA	NA	NA	NA	NA	NA	NA	NA	NA	NA	NA	NA	NA	NA	NA	NA	NA	NA	NA	NA	NA
					142	NA	NA	NA	NA	NA	NA	NA	NA	NA	NA	NA	NA	NA	NA	NA	NA	NA	NA	NA	NA	NA	NA	NA	NA	NA	NA	NA	NA	NA	NA	NA	NA	NA	NA	NA	NA	NA	NA	NA	NA	NA	NA	NA	NA
					143	NA	NA	NA	NA	NA	NA	NA	NA	NA	NA	NA	NA	NA	NA	NA	NA	NA	NA	NA	NA	NA	NA	NA	NA	NA	NA	NA	NA	NA	NA	NA	NA	NA	NA	NA	NA	NA	NA	NA	NA	NA	NA	NA	NA
					144	NA	NA	NA	NA	NA	NA	NA	NA	NA	NA	NA	NA	NA	NA	NA	NA	NA	NA	NA	NA	NA	NA	NA	NA	NA	NA	NA	NA	NA	NA	NA	NA	NA	NA	NA	NA	NA	NA	NA	NA	NA	NA	NA	NA
					145	NA	NA	NA	NA	NA	NA	NA	NA	NA	NA	NA	NA	NA	NA	NA	NA	NA	NA	NA	NA	NA	NA	NA	NA	NA	NA	NA	NA	NA	NA	NA	NA	NA	NA	NA	NA	NA	NA	NA	NA	NA	NA	NA	NA
					146	NA	NA	NA	NA	NA	NA	NA	NA	NA	NA	NA	NA	NA	NA	NA	NA	NA	NA	NA	NA	NA	NA	NA	NA	NA	NA	NA	NA	NA	NA	NA	NA	NA	NA	NA	NA	NA	NA	NA	NA	NA	NA	NA	NA
					147	NA	NA	NA	NA	NA	NA	NA	NA	NA	NA	NA	NA	NA	NA	NA	NA	NA	NA	NA	NA	NA	NA	NA	NA	NA	NA	NA	NA	NA	NA	NA	NA	NA	NA	NA	NA	NA	NA	NA	NA	NA	NA	NA	NA
					148	NA	NA	NA	NA	NA	NA	NA	NA	NA	NA	NA	NA	NA	NA	NA	NA	NA	NA	NA	NA	NA	NA	NA	NA	NA	NA	NA	NA	NA	NA	NA	NA	NA	NA	NA	NA	NA	NA	NA	NA	NA	NA	NA	NA
					149	NA	NA	NA	NA	NA	NA	NA	NA	NA	NA	NA	NA	NA	NA	NA	NA	NA	NA	NA	NA	NA	NA	NA	NA	NA	NA	NA	NA	NA	NA	NA	NA	NA	NA	NA	NA	NA	NA	NA	NA	NA	NA	NA	NA
					150	NA	NA	NA	NA	NA	NA	NA	NA	NA	NA	NA	NA	NA	NA	NA	NA	NA	NA	NA	NA	NA	NA	NA	NA	NA	NA	NA	NA	NA	NA	NA	NA	NA	NA	NA	NA	NA	NA	NA	NA	NA	NA	NA	NA
					151	NA	NA	NA	NA	NA	NA	NA	NA	NA	NA	NA	NA	NA	NA	NA	NA	NA	NA	NA	NA	NA	NA	NA	NA	NA	NA	NA	NA	NA	NA	NA	NA	NA	NA	NA	NA	NA	NA	NA	NA	NA	NA	NA	NA
					152	NA	NA	NA	NA	NA	NA	NA	NA	NA	NA	NA	NA	NA	NA	NA	NA	NA	NA	NA	NA	NA	NA	NA	NA	NA	NA	NA	NA	NA	NA	NA	NA	NA	NA	NA	NA	NA	NA	NA	NA	NA	NA	NA	NA
					153	NA	NA	NA	NA	NA	NA	NA	NA	NA	NA	NA	NA	NA	NA	NA	NA	NA	NA	NA	NA	NA	NA	NA	NA	NA	NA	NA	NA	NA	NA	NA	NA	NA	NA	NA	NA	NA	NA	NA	NA	NA	NA	NA	NA
					154	NA	NA	NA	NA	NA	NA	NA	NA	NA	NA	NA	NA	NA	NA	NA	NA	NA	NA	NA	NA	NA	NA	NA	NA	NA	NA	NA	NA	NA	NA	NA	NA	NA	NA	NA	NA	NA	NA	NA	NA	NA	NA	NA	NA
					155	NA	NA	NA	NA	NA	NA	NA	NA	NA	NA	NA	NA	NA	NA	NA	NA	NA	NA	NA	NA	NA	NA	NA	NA	NA	NA	NA	NA	NA	NA	NA	NA	NA	NA	NA	NA	NA	NA	NA	NA	NA	NA	NA	NA
					156	NA	NA	NA	NA	NA	NA	NA	NA	NA	NA	NA	NA	NA	NA	NA	NA	NA	NA	NA	NA	NA	NA	NA	NA	NA	NA	NA	NA	NA	NA	NA	NA	NA	NA	NA	NA	NA	NA	NA	NA	NA	NA	NA	NA
					157	NA	NA	NA	NA	NA	NA	NA	NA	NA	NA	NA	NA	NA	NA	NA	NA	NA	NA	NA	NA	NA	NA	NA	NA	NA	NA	NA	NA	NA	NA	NA	NA	NA	NA	NA	NA	NA	NA	NA	NA	NA	NA	NA	NA
					158	NA	NA	NA	NA	NA	NA	NA	NA	NA	NA	NA	NA	NA	NA	NA	NA	NA	NA	NA	NA	NA	NA	NA	NA	NA	NA	NA	NA	NA	NA	NA	NA	NA	NA	NA	NA	NA	NA	NA	NA	NA	NA	NA	NA
					159	NA	NA	NA	NA	NA	NA	NA	NA	NA	NA	NA	NA	NA	NA	NA	NA	NA	NA	NA	NA	NA	NA	NA	NA	NA	NA	NA	NA	NA	NA	NA	NA	NA	NA	NA	NA	NA	NA	NA	NA	NA	NA	NA	NA
					160	NA	NA	NA	NA	NA	NA	NA	NA	NA	NA	NA	NA	NA	NA	NA	NA	NA	NA	NA	NA	NA	NA	NA	NA	NA	NA	NA	NA	NA	NA	NA	NA	NA	NA	NA	NA	NA	NA	NA	NA	NA	NA	NA	NA
					161	NA	NA	NA	NA	NA	NA	NA	NA	NA	NA	NA	NA	NA	NA	NA	NA	NA	NA	NA	NA	NA	NA	NA	NA	NA	NA	NA	NA	NA	NA	NA	NA	NA	NA	NA	NA	NA	NA	NA	NA	NA	NA	NA	NA
					162	NA	NA	NA	NA	NA	NA	NA	NA	NA	NA	NA	NA	NA	NA	NA	NA	NA	NA	NA	NA	NA	NA	NA	NA	NA	NA	NA	NA	NA	NA	NA	NA	NA	NA	NA	NA	NA	NA	NA	NA	NA	NA	NA	NA
					163	NA	NA	NA	NA	NA	NA	NA	NA	NA	NA	NA	NA	NA	NA	NA	NA	NA	NA	NA	NA	NA	NA	NA	NA	NA	NA	NA	NA	NA	NA	NA	NA	NA	NA	NA	NA	NA	NA	NA	NA	NA	NA	NA	NA
					164	NA	NA	NA	NA	NA	NA	NA	NA	NA	NA	NA	NA	NA	NA	NA	NA	NA	NA	NA	NA	NA	NA	NA	NA	NA	NA	NA	NA	NA	NA	NA	NA	NA	NA	NA	NA	NA	NA	NA	NA	NA	NA	NA	NA
					165	NA	NA	NA	NA	NA	NA	NA	NA	NA	NA	NA	NA	NA	NA	NA	NA	NA	NA	NA	NA	NA	NA	NA	NA	NA	NA	NA	NA	NA	NA	NA	NA	NA	NA	NA	NA	NA	NA	NA	NA	NA	NA	NA	NA
					166	NA	NA	NA	NA	NA	NA	NA	NA	NA	NA	NA	NA	NA	NA	NA	NA	NA	NA	NA	NA	NA	NA	NA	NA	NA	NA	NA	NA	NA	NA	NA	NA	NA	NA	NA	NA	NA	NA	NA	NA	NA	NA	NA	NA
					167	NA	NA	NA	NA	NA	NA	NA	NA	NA	NA	NA	NA	NA	NA	NA	NA	NA	NA	NA	NA	NA	NA	NA	NA	NA	NA	NA	NA	NA	NA	NA	NA	NA	NA	NA	NA	NA	NA	NA	NA	NA	NA	NA	NA
					168	NA	NA	NA	NA	NA	NA	NA	NA	NA	NA	NA	NA	NA	NA	NA	NA	NA	NA	NA	NA	NA	NA	NA	NA	NA	NA	NA	NA	NA	NA	NA	NA	NA	NA	NA	NA	NA	NA	NA	NA	NA	NA	NA	NA
					169	NA	NA	NA	NA	NA	NA	NA	NA	NA	NA	NA	NA	NA	NA	NA	NA	NA	NA	NA	NA	NA	NA	NA	NA	NA	NA	NA	NA	NA	NA	NA	NA	NA	NA	NA	NA	NA	NA	NA	NA	NA	NA	NA	NA
					170	NA	NA	NA	NA	NA	NA	NA	NA	NA	NA	NA	NA	NA	NA	NA	NA	NA	NA	NA	NA	NA	NA	NA	NA	NA	NA	NA	NA	NA	NA	NA	NA	NA	NA	NA	NA	NA	NA	NA	NA	NA	NA	NA	NA
					171	NA	NA	NA	NA	NA	NA	NA	NA	NA	NA	NA	NA	NA	NA	NA	NA	NA	NA	NA	NA	NA	NA	NA	NA	NA	NA	NA	NA	NA	NA	NA	NA	NA	NA	NA	NA	NA	NA	NA	NA	NA	NA	NA	NA
					172	NA	NA	NA	NA	NA	NA	NA	NA	NA	NA	NA	NA	NA	NA	NA	NA	NA	NA	NA	NA	NA	NA	NA	NA	NA	NA	NA	NA	NA	NA	NA	NA	NA	NA	NA	NA	NA	NA	NA	NA	NA	NA	NA	NA
					173	NA	NA	NA	NA	NA	NA	NA	NA	NA	NA	NA	NA	NA	NA	NA	NA	NA	NA	NA	NA	NA	NA	NA	NA	NA	NA	NA	NA	NA	NA	NA	NA	NA	NA	NA	NA	NA	NA	NA	NA	NA	NA	NA	NA
[truncated: 284 more columns]

## Sheet: Nup60_KR
Nup60-GFP						1								2								3								4								5								6
Nup60K467R						Ic				Ir		Ibg		Ic				Ir		Ibg		Ic				Ir		Ibg		Ic				Ir		Ibg		Ic				Ir		Ibg		Ic
							767.897				708.514		161.21		369.918				610.431		117.004		357.234				306.099		157.494		377.082				450.934		129.762		453.142				382.378		156.178		497.458
							606.687								252.914								199.74								247.32								296.964								367.893
	average	median	SEM	n		Relative accumulation (RA)					547.303			Relative accumulation (RA)					493.428			Relative accumulation (RA)					148.606			Relative accumulation (RA)					321.171			Relative accumulation (RA)					226.2			Relative accumulation (RA)
RA:	1.58351	1.34293	0.160889	36		1.1085								0.512565								1.3441								0.770056								1.31284								0.789153
	p-value
	0.00178909
						171122_TR81.2.1_Nup60KR_Nup60GFP_01_01Crop_1.tifGFP_x_lc	171122_TR81.2.1_Nup60KR_Nup60GFP_01_01Crop_1.tifGFP_y_lc	171122_TR81.2.1_Nup60KR_Nup60GFP_01_01Crop_1.tifmCh_x_cap	171122_TR81.2.1_Nup60KR_Nup60GFP_01_01Crop_1.tifmCh_y_cap	171122_TR81.2.1_Nup60KR_Nup60GFP_01_01Crop_1.tifGFP_x_lr	171122_TR81.2.1_Nup60KR_Nup60GFP_01_01Crop_1.tifGFP_y_lr	171122_TR81.2.1_Nup60KR_Nup60GFP_01_01Crop_1.tifGFP_x_bg	171122_TR81.2.1_Nup60KR_Nup60GFP_01_01Crop_1.tifGFP_y_bg	171122_TR81.2.1_Nup60KR_Nup60GFP_01_01Crop_2.tifGFP_x_lc	171122_TR81.2.1_Nup60KR_Nup60GFP_01_01Crop_2.tifGFP_y_lc	171122_TR81.2.1_Nup60KR_Nup60GFP_01_01Crop_2.tifmCh_x_cap	171122_TR81.2.1_Nup60KR_Nup60GFP_01_01Crop_2.tifmCh_y_cap	171122_TR81.2.1_Nup60KR_Nup60GFP_01_01Crop_2.tifGFP_x_lr	171122_TR81.2.1_Nup60KR_Nup60GFP_01_01Crop_2.tifGFP_y_lr	171122_TR81.2.1_Nup60KR_Nup60GFP_01_01Crop_2.tifGFP_x_bg	171122_TR81.2.1_Nup60KR_Nup60GFP_01_01Crop_2.tifGFP_y_bg	171122_TR81.2.1_Nup60KR_Nup60GFP_01_01Crop_3.tifGFP_x_lc	171122_TR81.2.1_Nup60KR_Nup60GFP_01_01Crop_3.tifGFP_y_lc	171122_TR81.2.1_Nup60KR_Nup60GFP_01_01Crop_3.tifmCh_x_cap	171122_TR81.2.1_Nup60KR_Nup60GFP_01_01Crop_3.tifmCh_y_cap	171122_TR81.2.1_Nup60KR_Nup60GFP_01_01Crop_3.tifGFP_x_lr	171122_TR81.2.1_Nup60KR_Nup60GFP_01_01Crop_3.tifGFP_y_lr	171122_TR81.2.1_Nup60KR_Nup60GFP_01_01Crop_3.tifGFP_x_bg	171122_TR81.2.1_Nup60KR_Nup60GFP_01_01Crop_3.tifGFP_y_bg	171122_TR81.2.1_Nup60KR_Nup60GFP_01_01Crop_4.tifGFP_x_lc	171122_TR81.2.1_Nup60KR_Nup60GFP_01_01Crop_4.tifGFP_y_lc	171122_TR81.2.1_Nup60KR_Nup60GFP_01_01Crop_4.tifmCh_x_cap	171122_TR81.2.1_Nup60KR_Nup60GFP_01_01Crop_4.tifmCh_y_cap	171122_TR81.2.1_Nup60KR_Nup60GFP_01_01Crop_4.tifGFP_x_lr	171122_TR81.2.1_Nup60KR_Nup60GFP_01_01Crop_4.tifGFP_y_lr	171122_TR81.2.1_Nup60KR_Nup60GFP_01_01Crop_4.tifGFP_x_bg	171122_TR81.2.1_Nup60KR_Nup60GFP_01_01Crop_4.tifGFP_y_bg	171122_TR81.2.1_Nup60KR_Nup60GFP_01_02Crop_1.tifGFP_x_lc	171122_TR81.2.1_Nup60KR_Nup60GFP_01_02Crop_1.tifGFP_y_lc	171122_TR81.2.1_Nup60KR_Nup60GFP_01_02Crop_1.tifmCh_x_cap	171122_TR81.2.1_Nup60KR_Nup60GFP_01_02Crop_1.tifmCh_y_cap	171122_TR81.2.1_Nup60KR_Nup60GFP_01_02Crop_1.tifGFP_x_lr	171122_TR81.2.1_Nup60KR_Nup60GFP_01_02Crop_1.tifGFP_y_lr	171122_TR81.2.1_Nup60KR_Nup60GFP_01_02Crop_1.tifGFP_x_bg	171122_TR81.2.1_Nup60KR_Nup60GFP_01_02Crop_1.tifGFP_y_bg	171122_TR81.2.1_Nup60KR_Nup60GFP_01_02Crop_3.tifGFP_x_lc	171122_TR81.2.1_Nup60KR_Nup60GFP_01_02Crop_3.tifGFP_y_lc	171122_TR81.2.1_Nup60KR_Nup60GFP_01_02Crop_3.tifmCh_x_cap	171122_TR81.2.1_Nup60KR_Nup60GFP_01_02Crop_3.tifmCh_y_cap
					1	0	541	0	375	0	379	0	151	0	834	0	117	0	735	0	121	0	415	0	232	0	216	0	147	0	440	0	77	0	541	0	122	0	456	0	913	0	311	0	159	0	500	0	71
					2	0.064	609.477	0.064	757.741	0.064	455.182	0.064	149.642	0.064	722.183	0.064	164.657	0.064	614.605	0.064	119.197	0.064	367.695	0.064	250.714	0.064	251.821	0.064	141.121	0.064	441.723	0.064	91.53	0.064	494	0.064	129.792	0.064	425.347	0.064	1054.08	0.064	318.536	0.064	153.061	0.064	449.366	0.064	66.201
					3	0.128	746.156	0.128	1244.27	0.128	451.425	0.128	157.044	0.128	595.414	0.128	238.985	0.128	579.493	0.128	115.061	0.128	314.751	0.128	327.502	0.128	306.631	0.128	158.837	0.128	440.87	0.128	118.728	0.128	398	0.128	124.817	0.128	378.928	0.128	1111.11	0.128	300.047	0.128	134.146	0.128	425.657	0.128	86.715
					4	0.192	895.701	0.192	1901.92	0.192	454.695	0.192	169.978	0.192	511.166	0.192	373.977	0.192	533.278	0.192	111.707	0.192	282.835	0.192	572.632	0.192	337.03	0.192	161.855	0.192	467.868	0.192	170.224	0.192	350	0.192	125.888	0.192	366.475	0.192	1241.36	0.192	264.313	0.192	132.528	0.192	396.926	0.192	158.287
					5	0.256	988.268	0.256	2718.36	0.256	446.607	0.256	163.938	0.256	408.308	0.256	597.155	0.256	466.245	0.256	112.184	0.256	273.786	0.256	1025.43	0.256	327.466	0.256	149.1	0.256	488.424	0.256	241.427	0.256	404	0.256	131.879	0.256	358.831	0.256	1411.23	0.256	266.75	0.256	141.927	0.256	434.429	0.256	326.96
					6	0.32	897.598	0.32	3602.46	0.32	489.608	0.32	153.346	0.32	299.947	0.32	869.971	0.32	400.515	0.32	109.602	0.32	275.636	0.32	1582.32	0.32	312.775	0.32	162.43	0.32	478.812	0.32	335.303	0.32	486	0.32	131.377	0.32	321.962	0.32	1535.59	0.32	267.584	0.32	164.47	0.32	452.538	0.32	644.386
					7	0.384	809.052	0.384	4211.87	0.384	619.675	0.384	159.098	0.384	251.728	0.384	1225.85	0.384	377.983	0.384	106.374	0.384	305.504	0.384	2155.4	0.384	297.163	0.384	171.201	0.384	401.18	0.384	479.122	0.384	502	0.384	124.04	0.384	301.39	0.384	1556.35	0.384	274.661	0.384	168.205	0.384	423.212	0.384	1064.57
					8	0.448	793.393	0.448	4479.44	0.448	736.731	0.448	170.044	0.448	262.385	0.448	1575.84	0.448	356.426	0.448	118.716	0.448	353.121	0.448	2564.23	0.448	296.096	0.448	157.577	0.448	351.327	0.448	614.55	0.448	513	0.448	120.243	0.448	279.946	0.448	1459.28	0.448	277.271	0.448	154.115	0.448	366.125	0.448	1489.84
					9	0.512	782.047	0.512	4326.63	0.512	854.258	0.512	160.159	0.512	268.284	0.512	2024.99	0.512	341.517	0.512	125.17	0.512	343.542	0.512	2721.84	0.512	310.029	0.512	153.636	0.512	330.94	0.512	734.152	0.512	490.548	0.512	125.047	0.512	304.03	0.512	1247.83	0.512	301.362	0.512	146.13	0.512	319.611	0.512	1975.61
					10	0.576	774.727	0.576	3868.34	0.576	989.566	0.576	144.144	0.576	238.089	0.576	2382.18	0.576	356.537	0.576	123.344	0.576	334.595	0.576	2311.94	0.576	344.597	0.576	164.956	0.576	339.534	0.576	882.251	0.576	408.459	0.576	131.764	0.576	406.694	0.576	1062.14	0.576	301.622	0.576	135.884	0.576	311.654	0.576	2256.99
					11	0.64	726.618	0.64	3703.32	0.64	1023.93	0.64	138.757	0.64	211.728	0.64	2391.25	0.64	362.723	0.64	120.932	0.64	340.35	0.64	1932.15	0.64	386.376	0.64	172.336	0.64	380.526	0.64	1020.17	0.64	325.02	0.64	137.264	0.64	649.276	0.64	984.98	0.64	301.669	0.64	143.671	0.64	321.255	0.64	2131.05
					12	0.704	699.698	0.704	3862.03	0.704	942.381	0.704	138.799	0.704	196.45	0.704	1927.79	0.704	397.379	0.704	127.11	0.704	359.664	0.704	1486.79	0.704	405.562	0.704	167.511	0.704	436.701	0.704	1018.04	0.704	313.553	0.704	136.471	0.704	870.295	0.704	925.71	0.704	294.257	0.704	167.428	0.704	334.766	0.704	1818.9
					13	0.768	780.537	0.768	4046.26	0.768	698.931	0.768	150.028	0.768	179.018	0.768	1317.15	0.768	456.46	0.768	129.609	0.768	381.756	0.768	1082.76	0.768	411.992	0.768	157.934	0.768	421.426	0.768	912.612	0.768	339.025	0.768	127.16	0.768	1123.43	0.768	826.51	0.768	324.427	0.768	171.6	0.768	380.344	0.768	1273.31
					14	0.832	970.4	0.832	4297.43	0.832	474.908	0.832	163.199	0.832	166	0.832	726.593	0.832	477.013	0.832	127.706	0.832	440.121	0.832	788.205	0.832	368.651	0.832	154.543	0.832	358.094	0.832	787.029	0.832	350.335	0.832	131.291	0.832	1096.49	0.832	651.631	0.832	389.445	0.832	155.781	0.832	407.838	0.832	713.761
					15	0.896	1150.68	0.896	4481.85	0.896	352.696	0.896	165.488	0.896	190.242	0.896	368.024	0.896	524.475	0.896	133.314	0.896	465.254	0.896	563.101	0.896	308.061	0.896	153.301	0.896	274.878	0.896	648.234	0.896	318.293	0.896	128.647	0.896	913.766	0.896	443.94	0.896	464.93	0.896	155.292	0.896	375.732	0.896	337.411
					16	0.96	1267.84	0.96	4386.34	0.96	301.26	0.96	163.031	0.96	252.557	0.96	239.468	0.96	526.054	0.96	128.8	0.96	437.289	0.96	404.724	0.96	262.886	0.96	159.226	0.96	221.368	0.96	461.531	0.96	289.078	0.96	123.695	0.96	670.037	NA	NA	0.96	486.416	0.96	156.374	0.96	353.597	NA	NA
					17	1.024	1174.28	1.024	4146.56	1.024	279.569	1.024	155.865	1.024	337.921	1.024	213.622	1.024	486.657	1.024	122.497	1.024	396.109	1.024	321.82	1.024	236.228	1.024	170.246	1.024	208.686	1.024	322.469	1.024	303.2	1.024	121.14	1.024	472.278	NA	NA	1.024	428.464	1.024	146.718	1.024	390.616	NA	NA
					18	1.088	873.194	1.088	3602.69	1.088	279.609	1.088	159.427	1.088	379.329	1.088	203.934	1.088	512.199	1.088	122.273	1.088	343.204	1.088	277.124	1.088	221.636	1.088	170.221	1.088	235.443	1.088	217.196	1.088	333.45	1.088	127.741	1.088	339.766	NA	NA	1.088	373.585	1.088	141.67	1.088	462.714	NA	NA
					19	1.152	639.921	1.152	2693.17	1.152	322.609	1.152	172.977	1.152	393.556	1.152	197.656	1.152	613.084	1.152	125.324	NA	NA	1.152	258.467	1.152	225.943	1.152	166.513	1.152	318.784	NA	NA	1.152	340.7	1.152	140.182	1.152	265.784	NA	NA	1.152	366.942	1.152	148.356	1.152	573.131	NA	NA
					20	1.216	488.236	1.216	1716.03	1.216	348.271	1.216	171.741	1.216	410.798	1.216	187.586	1.216	697.528	1.216	132.082	NA	NA	NA	NA	1.216	242.462	1.216	157.884	1.216	418.527	NA	NA	1.216	287.8	1.216	143.649	1.216	212.044	NA	NA	1.216	360.327	1.216	162.245	1.216	729.128	NA	NA
					21	1.28	396.845	1.28	866.82	1.28	361.796	1.28	174.337	1.28	434.931	NA	NA	1.28	755.814	1.28	133.646	NA	NA	NA	NA	1.28	280.364	1.28	147.582	1.28	463.611	NA	NA	1.28	322.29	1.28	142.404	1.28	178	NA	NA	1.28	364.825	1.28	161.847	1.28	781.938	NA	NA
					22	1.344	420.124	1.344	364.339	1.344	328.589	1.344	175.945	1.344	430.497	NA	NA	1.344	821.07	1.344	127.062	NA	NA	NA	NA	1.344	349.785	1.344	153.321	NA	NA	NA	NA	1.344	355.284	1.344	144.893	1.344	209.2	NA	NA	1.344	379.366	1.344	154.962	1.344	880.498	NA	NA
					23	1.408	521.362	1.408	150.025	1.408	306.015	1.408	192.769	1.408	424.409	NA	NA	1.408	835.03	1.408	118.283	NA	NA	NA	NA	1.408	401.64	1.408	171.394	NA	NA	NA	NA	1.408	436.494	1.408	147.318	1.408	266.1	NA	NA	1.408	370.785	1.408	141.242	1.408	915.961	NA	NA
					24	1.472	569.927	1.472	64.178	1.472	307.956	1.472	195.417	1.472	440.883	NA	NA	1.472	770.69	1.472	115.12	NA	NA	NA	NA	1.472	385.44	1.472	174.647	NA	NA	NA	NA	1.472	495.356	1.472	151.994	1.472	310.7	NA	NA	1.472	365.003	1.472	143.419	1.472	803.79	NA	NA
					25	1.536	644.149	1.536	60	1.536	331.665	1.536	165.737	1.536	408.116	NA	NA	1.536	665.21	1.536	114.144	NA	NA	NA	NA	1.536	336.97	1.536	152.299	NA	NA	NA	NA	1.536	553.606	1.536	136.711	1.536	354.6	NA	NA	1.536	380.733	1.536	155.366	1.536	627.247	NA	NA
					26	1.6	713.428	NA	NA	1.6	310.508	1.6	163.47	NA	NA	NA	NA	1.6	516.83	1.6	111.312	NA	NA	NA	NA	1.6	286.09	1.6	139.36	NA	NA	NA	NA	1.6	595.515	1.6	125.144	1.6	467	NA	NA	1.6	445.054	1.6	158.318	1.6	515.835	NA	NA
					27	1.664	766.438	NA	NA	1.664	312.853	1.664	169.063	NA	NA	NA	NA	1.664	412.05	1.664	103.133	NA	NA	NA	NA	1.664	254.24	1.664	148.995	NA	NA	NA	NA	1.664	623.637	1.664	120.722	1.664	596.9	NA	NA	1.664	514.117	1.664	164.782	NA	NA	NA	NA
					28	1.728	813.037	NA	NA	1.728	360.28	1.728	176.689	NA	NA	NA	NA	1.728	434.88	1.728	105.354	NA	NA	NA	NA	1.728	250	1.728	149.202	NA	NA	NA	NA	1.728	695.5	1.728	124.945	1.728	622.6	NA	NA	1.728	566.453	1.728	162.959	NA	NA	NA	NA
					29	1.792	814.878	NA	NA	1.792	431.146	1.792	193.939	NA	NA	NA	NA	1.792	569.693	1.792	120.427	NA	NA	NA	NA	1.792	249.06	1.792	151.68	NA	NA	NA	NA	1.792	713.5	1.792	133.177	1.792	546.6	NA	NA	1.792	599.869	1.792	165.661	NA	NA	NA	NA
					30	NA	NA	NA	NA	1.856	542.942	1.856	195.183	NA	NA	NA	NA	1.856	796.433	1.856	124.442	NA	NA	NA	NA	1.856	258.235	1.856	162.341	NA	NA	NA	NA	1.856	633.94	1.856	139.388	1.856	433.565	NA	NA	1.856	625.154	1.856	172.842	NA	NA	NA	NA
					31	NA	NA	NA	NA	1.92	583.787	1.92	185.546	NA	NA	NA	NA	1.92	1036.94	1.92	123.701	NA	NA	NA	NA	1.92	277.192	1.92	150.322	NA	NA	NA	NA	1.92	542.38	1.92	138.569	1.92	392.416	NA	NA	1.92	595.943	1.92	191.668	NA	NA	NA	NA
					32	NA	NA	NA	NA	1.984	638.408	1.984	169.693	NA	NA	NA	NA	1.984	1075.21	1.984	124.101	NA	NA	NA	NA	1.984	311.447	1.984	146.9	NA	NA	NA	NA	1.984	610.832	1.984	129.718	1.984	357.6	NA	NA	1.984	502.997	1.984	203.572	NA	NA	NA	NA
					33	NA	NA	NA	NA	2.048	770.548	2.048	159.178	NA	NA	NA	NA	2.048	940.254	2.048	117.134	NA	NA	NA	NA	2.048	360.773	2.048	153.367	NA	NA	NA	NA	2.048	758.694	2.048	121.594	2.048	326.715	NA	NA	2.048	437.168	2.048	186.057	NA	NA	NA	NA
					34	NA	NA	NA	NA	2.112	830.942	2.112	151.971	NA	NA	NA	NA	2.112	834.974	2.112	114.526	NA	NA	NA	NA	2.112	386.623	2.112	158.843	NA	NA	NA	NA	2.112	774.169	2.112	120.553	2.112	369.514	NA	NA	2.112	358.429	2.112	178.649	NA	NA	NA	NA
					35	NA	NA	NA	NA	2.176	784.858	2.176	155.703	NA	NA	NA	NA	2.176	825.732	2.176	118.743	NA	NA	NA	NA	2.176	372	2.176	172.234	NA	NA	NA	NA	2.176	645.272	2.176	121.535	2.176	406.827	NA	NA	2.176	288.265	2.176	160.565	NA	NA	NA	NA
					36	NA	NA	NA	NA	2.24	742.379	2.24	167.929	NA	NA	NA	NA	2.24	931.543	2.24	118.685	NA	NA	NA	NA	2.24	369.6	2.24	162.495	NA	NA	NA	NA	2.24	476.015	2.24	126.727	2.24	451.818	NA	NA	2.24	263.687	2.24	152.251	NA	NA	NA	NA
					37	NA	NA	NA	NA	2.304	766.168	2.304	169.246	NA	NA	NA	NA	2.304	993.331	2.304	114.848	NA	NA	NA	NA	2.304	371.8	2.304	158.862	NA	NA	NA	NA	2.304	375.217	2.304	128.634	2.304	475.374	NA	NA	2.304	246.015	2.304	150.814	NA	NA	NA	NA
					38	NA	NA	NA	NA	2.368	865.116	2.368	155	NA	NA	NA	NA	2.368	1038.52	2.368	117.233	NA	NA	NA	NA	2.368	391.2	2.368	156.677	NA	NA	NA	NA	2.368	335.8	2.368	122.629	2.368	435.389	NA	NA	2.368	232.805	2.368	161.037	NA	NA	NA	NA
					39	NA	NA	NA	NA	2.432	864.826	2.432	154.589	NA	NA	NA	NA	2.432	1002.69	2.432	122.164	NA	NA	NA	NA	2.432	375.1	2.432	153.451	NA	NA	NA	NA	2.432	347.797	2.432	115.74	2.432	390.34	NA	NA	2.432	276.106	2.432	166.753	NA	NA	NA	NA
					40	NA	NA	NA	NA	2.496	715.961	2.496	180.621	NA	NA	NA	NA	2.496	892.929	2.496	123.957	NA	NA	NA	NA	2.496	316.9	2.496	170.41	NA	NA	NA	NA	2.496	379.023	2.496	118.572	2.496	321.667	NA	NA	2.496	356.836	2.496	160.335	NA	NA	NA	NA
					41	NA	NA	NA	NA	2.56	661.004	2.56	196.876	NA	NA	NA	NA	2.56	718.946	2.56	124.455	NA	NA	NA	NA	2.56	269.3	2.56	185.192	NA	NA	NA	NA	2.56	392.441	2.56	123.881	NA	NA	NA	NA	2.56	447.833	2.56	159.924	NA	NA	NA	NA
					42	NA	NA	NA	NA	2.624	759.557	2.624	188.414	NA	NA	NA	NA	2.624	599.168	2.624	117.131	NA	NA	NA	NA	2.624	225.1	2.624	171.992	NA	NA	NA	NA	2.624	353.85	2.624	125.687	NA	NA	NA	NA	2.624	589.411	2.624	158.279	NA	NA	NA	NA
					43	NA	NA	NA	NA	2.688	962.939	2.688	174.264	NA	NA	NA	NA	2.688	592.074	2.688	119.331	NA	NA	NA	NA	2.688	200.2	2.688	149.211	NA	NA	NA	NA	2.688	297.121	2.688	135.395	NA	NA	NA	NA	2.688	607.252	2.688	166.33	NA	NA	NA	NA
					44	NA	NA	NA	NA	2.752	1138.3	2.752	171.723	NA	NA	NA	NA	2.752	628.991	2.752	125.311	NA	NA	NA	NA	2.752	203.8	2.752	150.824	NA	NA	NA	NA	2.752	265.912	2.752	138.849	NA	NA	NA	NA	2.752	562.067	2.752	167.165	NA	NA	NA	NA
					45	NA	NA	NA	NA	2.816	1090.69	2.816	163.468	NA	NA	NA	NA	2.816	666.167	2.816	128.587	NA	NA	NA	NA	2.816	240	2.816	152.532	NA	NA	NA	NA	2.816	269.138	2.816	137.347	NA	NA	NA	NA	2.816	508.084	2.816	153.865	NA	NA	NA	NA
					46	NA	NA	NA	NA	2.88	882.525	2.88	165.725	NA	NA	NA	NA	2.88	676.787	2.88	124.495	NA	NA	NA	NA	2.88	288.3	2.88	153.775	NA	NA	NA	NA	2.88	317.561	2.88	129.183	NA	NA	NA	NA	2.88	497.07	2.88	145.188	NA	NA	NA	NA
					47	NA	NA	NA	NA	2.944	760.711	2.944	178.226	NA	NA	NA	NA	2.944	704.112	2.944	121.56	NA	NA	NA	NA	NA	NA	2.944	150.302	NA	NA	NA	NA	2.944	428.863	2.944	129.071	NA	NA	NA	NA	2.944	516.932	2.944	150.523	NA	NA	NA	NA
					48	NA	NA	NA	NA	3.008	698.163	3.008	170.208	NA	NA	NA	NA	3.008	718.919	3.008	109.525	NA	NA	NA	NA	NA	NA	3.008	151.055	NA	NA	NA	NA	3.008	615.538	3.008	126.599	NA	NA	NA	NA	3.008	516.617	3.008	157.125	NA	NA	NA	NA
					49	NA	NA	NA	NA	3.072	723.363	3.072	147.076	NA	NA	NA	NA	3.072	722.265	3.072	94.908	NA	NA	NA	NA	NA	NA	3.072	152.829	NA	NA	NA	NA	3.072	733.517	3.072	117.285	NA	NA	NA	NA	3.072	504.645	3.072	146.839	NA	NA	NA	NA
					50	NA	NA	NA	NA	3.136	780.481	3.136	136.858	NA	NA	NA	NA	3.136	740.721	3.136	100.903	NA	NA	NA	NA	NA	NA	3.136	153.405	NA	NA	NA	NA	3.136	705.25	NA	NA	NA	NA	NA	NA	3.136	498.464	3.136	134.032	NA	NA	NA	NA
					51	NA	NA	NA	NA	3.2	767.209	3.2	157.754	NA	NA	NA	NA	3.2	700.267	3.2	111.971	NA	NA	NA	NA	NA	NA	3.2	150.552	NA	NA	NA	NA	3.2	609.636	NA	NA	NA	NA	NA	NA	3.2	486.448	3.2	140.826	NA	NA	NA	NA
					52	NA	NA	NA	NA	3.264	674.926	3.264	143.171	NA	NA	NA	NA	3.264	571.844	3.264	107.853	NA	NA	NA	NA	NA	NA	3.264	145.288	NA	NA	NA	NA	3.264	479.973	NA	NA	NA	NA	NA	NA	3.264	452.14	3.264	140.694	NA	NA	NA	NA
					53	NA	NA	NA	NA	3.328	576.998	3.328	131.426	NA	NA	NA	NA	3.328	402.87	3.328	101.068	NA	NA	NA	NA	NA	NA	3.328	141.342	NA	NA	NA	NA	3.328	374.087	NA	NA	NA	NA	NA	NA	3.328	409.609	3.328	131.729	NA	NA	NA	NA
					54	NA	NA	NA	NA	3.392	640.671	3.392	137.292	NA	NA	NA	NA	3.392	265.655	3.392	102.685	NA	NA	NA	NA	NA	NA	3.392	145.298	NA	NA	NA	NA	3.392	286.515	NA	NA	NA	NA	NA	NA	3.392	376.411	3.392	144.382	NA	NA	NA	NA
					55	NA	NA	NA	NA	3.456	726.655	3.456	127.443	NA	NA	NA	NA	3.456	187.251	3.456	101.491	NA	NA	NA	NA	NA	NA	3.456	142.619	NA	NA	NA	NA	3.456	214.16	NA	NA	NA	NA	NA	NA	3.456	335.71	3.456	155.644	NA	NA	NA	NA
					56	NA	NA	NA	NA	3.52	760.858	3.52	123.164	NA	NA	NA	NA	3.52	171.207	3.52	100.856	NA	NA	NA	NA	NA	NA	3.52	157.002	NA	NA	NA	NA	NA	NA	NA	NA	NA	NA	NA	NA	3.52	338.031	3.52	165.289	NA	NA	NA	NA
					57	NA	NA	NA	NA	3.584	852.99	3.584	127.72	NA	NA	NA	NA	3.584	198.089	3.584	102.698	NA	NA	NA	NA	NA	NA	3.584	177.252	NA	NA	NA	NA	NA	NA	NA	NA	NA	NA	NA	NA	3.584	343.034	3.584	166.457	NA	NA	NA	NA
					58	NA	NA	NA	NA	3.648	844.85	3.648	130.873	NA	NA	NA	NA	3.648	256.093	3.648	110	NA	NA	NA	NA	NA	NA	3.648	165.369	NA	NA	NA	NA	NA	NA	NA	NA	NA	NA	NA	NA	3.648	302.634	3.648	161.686	NA	NA	NA	NA
					59	NA	NA	NA	NA	3.712	696.28	3.712	130.001	NA	NA	NA	NA	3.712	326.318	3.712	106.879	NA	NA	NA	NA	NA	NA	3.712	156.367	NA	NA	NA	NA	NA	NA	NA	NA	NA	NA	NA	NA	3.712	259.161	3.712	150.663	NA	NA	NA	NA
					60	NA	NA	NA	NA	3.776	530.689	NA	NA	NA	NA	NA	NA	3.776	422.735	3.776	101	NA	NA	NA	NA	NA	NA	3.776	148.833	NA	NA	NA	NA	NA	NA	NA	NA	NA	NA	NA	NA	3.776	226.26	3.776	145.421	NA	NA	NA	NA
					61	NA	NA	NA	NA	3.84	523.961	NA	NA	NA	NA	NA	NA	3.84	540.049	3.84	125.124	NA	NA	NA	NA	NA	NA	3.84	148.541	NA	NA	NA	NA	NA	NA	NA	NA	NA	NA	NA	NA	3.84	197.218	3.84	153.407	NA	NA	NA	NA
					62	NA	NA	NA	NA	3.904	535.893	NA	NA	NA	NA	NA	NA	3.904	703.732	3.904	121.618	NA	NA	NA	NA	NA	NA	3.904	156.505	NA	NA	NA	NA	NA	NA	NA	NA	NA	NA	NA	NA	3.904	184.46	3.904	156.95	NA	NA	NA	NA
					63	NA	NA	NA	NA	3.968	576.016	NA	NA	NA	NA	NA	NA	3.968	707.327	3.968	106.333	NA	NA	NA	NA	NA	NA	3.968	160.949	NA	NA	NA	NA	NA	NA	NA	NA	NA	NA	NA	NA	3.968	196.861	3.968	158.603	NA	NA	NA	NA
					64	NA	NA	NA	NA	4.032	752.255	NA	NA	NA	NA	NA	NA	4.032	645.791	4.032	106.595	NA	NA	NA	NA	NA	NA	4.032	160.945	NA	NA	NA	NA	NA	NA	NA	NA	NA	NA	NA	NA	4.032	240.54	4.032	172.499	NA	NA	NA	NA
					65	NA	NA	NA	NA	4.096	951.512	NA	NA	NA	NA	NA	NA	4.096	645.397	4.096	112.445	NA	NA	NA	NA	NA	NA	4.096	156.789	NA	NA	NA	NA	NA	NA	NA	NA	NA	NA	NA	NA	4.096	300.924	4.096	162.451	NA	NA	NA	NA
					66	NA	NA	NA	NA	4.16	1146.68	NA	NA	NA	NA	NA	NA	4.16	684.461	4.16	113.041	NA	NA	NA	NA	NA	NA	4.16	156.722	NA	NA	NA	NA	NA	NA	NA	NA	NA	NA	NA	NA	4.16	356.672	4.16	148.1	NA	NA	NA	NA
					67	NA	NA	NA	NA	4.224	1461.16	NA	NA	NA	NA	NA	NA	4.224	736.679	4.224	115.477	NA	NA	NA	NA	NA	NA	4.224	159.137	NA	NA	NA	NA	NA	NA	NA	NA	NA	NA	NA	NA	4.224	391.322	4.224	140.665	NA	NA	NA	NA
					68	NA	NA	NA	NA	4.288	1765.36	NA	NA	NA	NA	NA	NA	NA	NA	4.288	117.176	NA	NA	NA	NA	NA	NA	4.288	160.714	NA	NA	NA	NA	NA	NA	NA	NA	NA	NA	NA	NA	4.288	419.327	4.288	138.438	NA	NA	NA	NA
					69	NA	NA	NA	NA	4.352	1907.52	NA	NA	NA	NA	NA	NA	NA	NA	4.352	122.49	NA	NA	NA	NA	NA	NA	4.352	168.376	NA	NA	NA	NA	NA	NA	NA	NA	NA	NA	NA	NA	4.352	400.077	4.352	139.341	NA	NA	NA	NA
					70	NA	NA	NA	NA	4.416	1598.24	NA	NA	NA	NA	NA	NA	NA	NA	4.416	122.932	NA	NA	NA	NA	NA	NA	4.416	163.041	NA	NA	NA	NA	NA	NA	NA	NA	NA	NA	NA	NA	4.416	419.169	4.416	142.019	NA	NA	NA	NA
					71	NA	NA	NA	NA	4.48	1255.4	NA	NA	NA	NA	NA	NA	NA	NA	4.48	121.651	NA	NA	NA	NA	NA	NA	4.48	159.548	NA	NA	NA	NA	NA	NA	NA	NA	NA	NA	NA	NA	4.48	422.339	4.48	145.645	NA	NA	NA	NA
					72	NA	NA	NA	NA	4.544	951.48	NA	NA	NA	NA	NA	NA	NA	NA	4.544	121.172	NA	NA	NA	NA	NA	NA	4.544	155.361	NA	NA	NA	NA	NA	NA	NA	NA	NA	NA	NA	NA	4.544	378.427	4.544	146.544	NA	NA	NA	NA
					73	NA	NA	NA	NA	NA	NA	NA	NA	NA	NA	NA	NA	NA	NA	4.608	122.481	NA	NA	NA	NA	NA	NA	4.608	153.379	NA	NA	NA	NA	NA	NA	NA	NA	NA	NA	NA	NA	4.608	357.791	4.608	144.516	NA	NA	NA	NA
					74	NA	NA	NA	NA	NA	NA	NA	NA	NA	NA	NA	NA	NA	NA	NA	NA	NA	NA	NA	NA	NA	NA	4.672	154.943	NA	NA	NA	NA	NA	NA	NA	NA	NA	NA	NA	NA	4.672	355.379	4.672	147.905	NA	NA	NA	NA
					75	NA	NA	NA	NA	NA	NA	NA	NA	NA	NA	NA	NA	NA	NA	NA	NA	NA	NA	NA	NA	NA	NA	4.736	159.312	NA	NA	NA	NA	NA	NA	NA	NA	NA	NA	NA	NA	4.736	405.83	4.736	158.679	NA	NA	NA	NA
					76	NA	NA	NA	NA	NA	NA	NA	NA	NA	NA	NA	NA	NA	NA	NA	NA	NA	NA	NA	NA	NA	NA	4.8	162.395	NA	NA	NA	NA	NA	NA	NA	NA	NA	NA	NA	NA	4.8	444.426	4.8	184.465	NA	NA	NA	NA
					77	NA	NA	NA	NA	NA	NA	NA	NA	NA	NA	NA	NA	NA	NA	NA	NA	NA	NA	NA	NA	NA	NA	NA	NA	NA	NA	NA	NA	NA	NA	NA	NA	NA	NA	NA	NA	4.864	433.68	4.864	182.177	NA	NA	NA	NA
					78	NA	NA	NA	NA	NA	NA	NA	NA	NA	NA	NA	NA	NA	NA	NA	NA	NA	NA	NA	NA	NA	NA	NA	NA	NA	NA	NA	NA	NA	NA	NA	NA	NA	NA	NA	NA	4.928	397.64	4.928	166.579	NA	NA	NA	NA
					79	NA	NA	NA	NA	NA	NA	NA	NA	NA	NA	NA	NA	NA	NA	NA	NA	NA	NA	NA	NA	NA	NA	NA	NA	NA	NA	NA	NA	NA	NA	NA	NA	NA	NA	NA	NA	4.992	382.2	4.992	175.335	NA	NA	NA	NA
					80	NA	NA	NA	NA	NA	NA	NA	NA	NA	NA	NA	NA	NA	NA	NA	NA	NA	NA	NA	NA	NA	NA	NA	NA	NA	NA	NA	NA	NA	NA	NA	NA	NA	NA	NA	NA	5.056	352.84	NA	NA	NA	NA	NA	NA
					81	NA	NA	NA	NA	NA	NA	NA	NA	NA	NA	NA	NA	NA	NA	NA	NA	NA	NA	NA	NA	NA	NA	NA	NA	NA	NA	NA	NA	NA	NA	NA	NA	NA	NA	NA	NA	5.12	314.48	NA	NA	NA	NA	NA	NA
																																														NA	NA	NA	NA
																																														NA	NA	NA	NA
																																														NA	NA	NA	NA
																																														NA	NA	NA	NA
																																														NA	NA	NA	NA
																																														NA	NA	NA	NA
																																														NA	NA	NA	NA
																																														NA	NA	NA	NA
																																														NA	NA	NA	NA
																																														NA	NA	NA	NA
																																														NA	NA	NA	NA
																																														NA	NA	NA	NA
																																														NA	NA	NA	NA
																																														NA	NA	NA	NA
																																														NA	NA	NA	NA
																																														NA	NA	NA	NA
																																														NA	NA	NA	NA
																																														NA	NA	NA	NA
																																														NA	NA	NA	NA
																																														NA	NA	NA	NA
																																														NA	NA	NA	NA
																																														NA	NA	NA	NA
																																														NA	NA	NA	NA
																																														NA	NA	NA	NA
																																														NA	NA	NA	NA
[truncated: 244 more columns]

## Sheet: Mlp1_KR
Mlp1-GFP						1								2								3								4								5								6
Nup60K467R						Ic				Ir		Ibg		Ic				Ir		Ibg		Ic				Ir		Ibg		Ic				Ir		Ibg		Ic				Ir		Ibg		Ic
							478.429				819.47		152.028		295.813				706.802		162.461		406.659				480.426		156.223		397.441				549.395		139.825		207.8				451.548		147.688		635.683
							326.4								133.352								250.436								257.616								60.1119								493.19
	average	median	SEM	n		Relative accumulation (RA)					667.442			Relative accumulation (RA)					544.341			Relative accumulation (RA)					324.203			Relative accumulation (RA)					409.57			Relative accumulation (RA)					303.86			Relative accumulation (RA)
RA:	0.44956	0.414382	0.0336955	53		0.489032								0.244979								0.772466								0.62899								0.197827								1.3752
	p-value
	5.93279e-17
						171122_TR81.3.1_Nup60KR_Mlp1GFP_03_01Crop_1.tifGFP_x_lc	171122_TR81.3.1_Nup60KR_Mlp1GFP_03_01Crop_1.tifGFP_y_lc	171122_TR81.3.1_Nup60KR_Mlp1GFP_03_01Crop_1.tifmCh_x_cap	171122_TR81.3.1_Nup60KR_Mlp1GFP_03_01Crop_1.tifmCh_y_cap	171122_TR81.3.1_Nup60KR_Mlp1GFP_03_01Crop_1.tifGFP_x_lr	171122_TR81.3.1_Nup60KR_Mlp1GFP_03_01Crop_1.tifGFP_y_lr	171122_TR81.3.1_Nup60KR_Mlp1GFP_03_01Crop_1.tifGFP_x_bg	171122_TR81.3.1_Nup60KR_Mlp1GFP_03_01Crop_1.tifGFP_y_bg	171122_TR81.3.1_Nup60KR_Mlp1GFP_03_01Crop_2.tifGFP_x_lc	171122_TR81.3.1_Nup60KR_Mlp1GFP_03_01Crop_2.tifGFP_y_lc	171122_TR81.3.1_Nup60KR_Mlp1GFP_03_01Crop_2.tifmCh_x_cap	171122_TR81.3.1_Nup60KR_Mlp1GFP_03_01Crop_2.tifmCh_y_cap	171122_TR81.3.1_Nup60KR_Mlp1GFP_03_01Crop_2.tifGFP_x_lr	171122_TR81.3.1_Nup60KR_Mlp1GFP_03_01Crop_2.tifGFP_y_lr	171122_TR81.3.1_Nup60KR_Mlp1GFP_03_01Crop_2.tifGFP_x_bg	171122_TR81.3.1_Nup60KR_Mlp1GFP_03_01Crop_2.tifGFP_y_bg	171122_TR81.3.1_Nup60KR_Mlp1GFP_03_01Crop_3.tifGFP_x_lc	171122_TR81.3.1_Nup60KR_Mlp1GFP_03_01Crop_3.tifGFP_y_lc	171122_TR81.3.1_Nup60KR_Mlp1GFP_03_01Crop_3.tifmCh_x_cap	171122_TR81.3.1_Nup60KR_Mlp1GFP_03_01Crop_3.tifmCh_y_cap	171122_TR81.3.1_Nup60KR_Mlp1GFP_03_01Crop_3.tifGFP_x_lr	171122_TR81.3.1_Nup60KR_Mlp1GFP_03_01Crop_3.tifGFP_y_lr	171122_TR81.3.1_Nup60KR_Mlp1GFP_03_01Crop_3.tifGFP_x_bg	171122_TR81.3.1_Nup60KR_Mlp1GFP_03_01Crop_3.tifGFP_y_bg	171122_TR81.3.1_Nup60KR_Mlp1GFP_03_02Crop_1.tifGFP_x_lc	171122_TR81.3.1_Nup60KR_Mlp1GFP_03_02Crop_1.tifGFP_y_lc	171122_TR81.3.1_Nup60KR_Mlp1GFP_03_02Crop_1.tifmCh_x_cap	171122_TR81.3.1_Nup60KR_Mlp1GFP_03_02Crop_1.tifmCh_y_cap	171122_TR81.3.1_Nup60KR_Mlp1GFP_03_02Crop_1.tifGFP_x_lr	171122_TR81.3.1_Nup60KR_Mlp1GFP_03_02Crop_1.tifGFP_y_lr	171122_TR81.3.1_Nup60KR_Mlp1GFP_03_02Crop_1.tifGFP_x_bg	171122_TR81.3.1_Nup60KR_Mlp1GFP_03_02Crop_1.tifGFP_y_bg	171122_TR81.3.1_Nup60KR_Mlp1GFP_03_02Crop_2.tifGFP_x_lc	171122_TR81.3.1_Nup60KR_Mlp1GFP_03_02Crop_2.tifGFP_y_lc	171122_TR81.3.1_Nup60KR_Mlp1GFP_03_02Crop_2.tifmCh_x_cap	171122_TR81.3.1_Nup60KR_Mlp1GFP_03_02Crop_2.tifmCh_y_cap	171122_TR81.3.1_Nup60KR_Mlp1GFP_03_02Crop_2.tifGFP_x_lr	171122_TR81.3.1_Nup60KR_Mlp1GFP_03_02Crop_2.tifGFP_y_lr	171122_TR81.3.1_Nup60KR_Mlp1GFP_03_02Crop_2.tifGFP_x_bg	171122_TR81.3.1_Nup60KR_Mlp1GFP_03_02Crop_2.tifGFP_y_bg	171122_TR81.3.1_Nup60KR_Mlp1GFP_03_04Crop_1.tifGFP_x_lc	171122_TR81.3.1_Nup60KR_Mlp1GFP_03_04Crop_1.tifGFP_y_lc	171122_TR81.3.1_Nup60KR_Mlp1GFP_03_04Crop_1.tifmCh_x_cap	171122_TR81.3.1_Nup60KR_Mlp1GFP_03_04Crop_1.tifmCh_y_cap
					1	0	202	0	46	0	1225	0	163	0	340	0	3227	0	687	0	129	0	543	0	99	0	789	0	183	0	534	0	172	0	474	0	149	0	129	0	183	0	555	0	136	0	480	0	745
					2	0.064	225.627	0.064	154.742	0.064	953.486	0.064	169.818	0.064	273	0.064	3563	0.064	770.48	0.064	146.499	0.064	568.265	0.064	180.611	0.064	691.85	0.064	164.304	0.064	390.144	0.064	240.706	0.064	591.053	0.064	146.653	0.064	134.036	0.064	238.054	0.064	638	0.064	138.571	0.064	463.234	0.064	921.784
					3	0.128	266.87	0.128	392.021	0.128	808.608	0.128	169.502	0.128	196	0.128	3522	0.128	873.72	0.128	157.896	0.128	466.563	0.128	365.504	0.128	553.805	0.128	155.696	0.128	303.709	0.128	355.56	0.128	587.484	0.128	152.91	0.128	143.016	0.128	259.059	0.128	688	0.128	149.132	0.128	515.472	0.128	1014.49
					4	0.192	334.809	0.192	776.45	0.192	654.782	0.192	170.101	0.192	166	0.192	3268	0.192	765.68	0.192	151.499	0.192	339.602	0.192	653.98	0.192	404.414	0.192	156.311	0.192	258.107	0.192	622.917	0.192	534.437	0.192	160.882	0.192	157.99	0.192	269.543	0.192	729	0.192	155.857	0.192	539.078	0.192	1159.02
					5	0.256	403.078	0.256	1262.38	0.256	533.545	0.256	171.509	0.256	156	0.256	2995	0.256	623.44	0.256	138.889	0.256	232.757	0.256	929.608	0.256	336.838	0.256	148.732	0.256	221.476	0.256	1125.65	0.256	493.588	0.256	160.3	0.256	170.329	0.256	308.036	0.256	649	0.256	145.838	0.256	552.444	0.256	1299.57
					6	0.32	398.408	0.32	1739.58	0.32	501.786	0.32	160.731	0.32	164.207	0.32	3076.59	0.32	405	0.32	139.112	0.32	182.902	0.32	1053.63	0.32	378.872	0.32	151.791	0.32	218.19	0.32	1764.32	0.32	567.939	0.32	155.477	0.32	175.43	0.32	405.754	0.32	548	0.32	142.237	0.32	604.073	0.32	1546.3
					7	0.384	389.008	0.384	2177.98	0.384	599.248	0.384	163.86	0.384	199.627	0.384	3232.87	0.384	261.881	0.384	145.198	0.384	148.899	0.384	1111.75	0.384	465.354	0.384	159.664	0.384	266.539	0.384	2492.55	0.384	776.568	0.384	154.758	0.384	186.313	0.384	553.523	0.384	507	0.384	143.218	0.384	688.315	0.384	1964.66
					8	0.448	374.676	0.448	2508.2	0.448	850.62	0.448	150.313	0.448	265.933	0.448	3423.22	0.448	212.944	0.448	140.092	0.448	150.219	0.448	1127.87	0.448	548.263	0.448	150.538	0.448	378.129	0.448	3178.03	0.448	1052.68	0.448	147.621	0.448	208.246	0.448	776.349	0.448	482	0.448	145.472	0.448	711.307	0.448	2386.3
					9	0.512	300.973	0.512	2833.81	0.512	1222.26	0.512	151.224	0.512	381.852	0.512	3392.85	0.512	269.79	0.512	154.625	0.512	152.11	0.512	1212.38	0.512	604	0.512	147.002	0.512	593.725	0.512	3474.6	0.512	1339.1	0.512	144.03	0.512	233.292	0.512	1106.82	0.512	438.323	0.512	138.826	0.512	637.803	0.512	2476.23
					10	0.576	242.961	0.576	3462.88	0.576	1548.16	0.576	161.259	0.576	475.058	0.576	2889.62	0.576	421.65	0.576	157.324	0.576	170.205	0.576	1326.87	0.576	535.476	0.576	147.656	0.576	810.391	0.576	3864.08	0.576	1385.21	0.576	143.005	0.576	241.625	0.576	1319.46	0.576	398.014	0.576	137.907	0.576	532.383	0.576	2286.73
					11	0.64	247.785	0.64	4033.49	0.64	1431.23	0.64	173.015	0.64	636.265	0.64	2195.38	0.64	598.575	0.64	158.469	0.64	183.256	0.64	1374.01	0.64	460.601	0.64	151.778	NA	NA	0.64	3357.55	0.64	1348.72	0.64	140.536	0.64	261.881	0.64	1242.72	0.64	344.22	0.64	141.253	0.64	496.985	0.64	2149.47
					12	0.704	314.29	0.704	4503.57	0.704	1022.92	0.704	174.392	NA	NA	NA	NA	0.704	678.249	0.704	150.384	0.704	165.716	0.704	1394.81	0.704	411.989	0.704	147.242	NA	NA	0.704	2080.96	0.704	1152.38	0.704	136.721	0.704	301.583	0.704	1054.7	0.704	305.376	0.704	142.897	0.704	567.3	0.704	1934.87
					13	0.768	442.847	0.768	4828.9	0.768	664.988	0.768	174.673	NA	NA	NA	NA	0.768	675.145	0.768	142.38	0.768	141.067	0.768	1525.91	0.768	406.113	0.768	147.626	NA	NA	0.768	959	0.768	836.863	0.768	139.254	0.768	358.654	0.768	867.685	0.768	296.912	0.768	141.453	0.768	706.4	0.768	1838.55
					14	0.832	622.615	0.832	4901.55	0.832	449.299	0.832	165.416	NA	NA	NA	NA	0.832	567.663	0.832	155.632	0.832	125.918	0.832	1755.76	0.832	422.421	0.832	149.372	NA	NA	0.832	351.31	0.832	547.355	0.832	144.608	NA	NA	NA	NA	0.832	296.202	0.832	143.408	0.832	849.4	0.832	1777.91
					15	0.896	685.489	0.896	4712.88	0.896	360.805	0.896	162.758	NA	NA	NA	NA	0.896	439.782	0.896	161.364	0.896	116.768	0.896	1941.63	0.896	437.51	0.896	145.326	NA	NA	NA	NA	0.896	405.708	0.896	150.278	NA	NA	NA	NA	0.896	274.958	0.896	147.856	0.896	903.4	0.896	1480.61
					16	0.96	596.175	0.96	4310.52	0.96	365.898	0.96	159.876	NA	NA	NA	NA	0.96	320.13	0.96	168.636	0.96	118.04	0.96	2023.86	0.96	440.759	0.96	151.984	NA	NA	NA	NA	0.96	332.383	0.96	148.273	NA	NA	NA	NA	0.96	265.899	0.96	153.253	0.96	816.919	0.96	1014.01
					17	1.024	422.601	1.024	3842.14	1.024	449.224	1.024	168.671	NA	NA	NA	NA	1.024	294.642	1.024	151.191	1.024	129.19	1.024	2079.87	1.024	451.761	1.024	156.835	NA	NA	NA	NA	1.024	262.332	1.024	138.739	NA	NA	NA	NA	1.024	279.859	1.024	158.414	1.024	741.615	1.024	606.795
					18	1.088	211.779	1.088	3447.39	1.088	568.082	1.088	165.825	NA	NA	NA	NA	1.088	362.369	1.088	141.5	1.088	161.09	1.088	2087.45	1.088	450.705	1.088	151.42	NA	NA	NA	NA	1.088	208.161	1.088	138.03	NA	NA	NA	NA	1.088	270.657	1.088	154.482	1.088	636.164	NA	NA
					19	1.152	133.231	1.152	3130.93	1.152	670.692	1.152	150.679	NA	NA	NA	NA	1.152	479.64	1.152	143.386	1.152	217.95	1.152	2035.94	1.152	450.038	1.152	156.156	NA	NA	NA	NA	1.152	181.457	1.152	146.171	NA	NA	NA	NA	1.152	284.725	1.152	149.899	NA	NA	NA	NA
					20	1.216	142.065	1.216	2876.78	1.216	731.953	1.216	144.79	NA	NA	NA	NA	1.216	537.86	1.216	148.269	1.216	316.97	1.216	2093.79	1.216	365.905	1.216	176.674	NA	NA	NA	NA	1.216	186.486	1.216	146.67	NA	NA	NA	NA	1.216	339.159	1.216	150.966	NA	NA	NA	NA
					21	1.28	174.772	1.28	2606.23	1.28	706.364	1.28	165.516	NA	NA	NA	NA	1.28	515.339	1.28	151.417	1.28	445.42	1.28	2014.03	1.28	280.154	1.28	188.404	NA	NA	NA	NA	1.28	220.533	1.28	150.427	NA	NA	NA	NA	1.28	419.869	1.28	163.036	NA	NA	NA	NA
					22	1.344	211.549	1.344	2521.03	1.344	729.704	1.344	181.446	NA	NA	NA	NA	1.344	388.774	1.344	140.951	1.344	518.94	1.344	1744.26	1.344	222.577	1.344	183.645	NA	NA	NA	NA	1.344	271.903	1.344	148.368	NA	NA	NA	NA	1.344	479.08	1.344	174.49	NA	NA	NA	NA
					23	1.408	242.432	1.408	2392.51	1.408	760.303	1.408	186.853	NA	NA	NA	NA	1.408	286.309	1.408	146.763	1.408	486.38	1.408	1274.09	1.408	182.646	1.408	172.491	NA	NA	NA	NA	1.408	305.907	1.408	136.358	NA	NA	NA	NA	1.408	484.317	1.408	173.435	NA	NA	NA	NA
					24	1.472	302.866	1.472	2018.81	1.472	687.821	1.472	184.033	NA	NA	NA	NA	1.472	260.165	1.472	153.111	1.472	448.032	1.472	728.748	1.472	199.868	1.472	153.302	NA	NA	NA	NA	1.472	308.791	1.472	131.834	NA	NA	NA	NA	1.472	478.675	1.472	170.898	NA	NA	NA	NA
					25	1.536	413.235	1.536	1511.21	1.536	570.592	1.536	183.451	NA	NA	NA	NA	1.536	234.111	1.536	148.669	1.536	432.109	1.536	321.646	1.536	267.178	1.536	147.938	NA	NA	NA	NA	1.536	302.004	1.536	136.755	NA	NA	NA	NA	1.536	435.305	1.536	168.498	NA	NA	NA	NA
					26	1.6	663.245	1.6	904.214	1.6	496.32	1.6	168.416	NA	NA	NA	NA	1.6	229.963	1.6	144.75	1.6	451.858	1.6	300.652	1.6	318.747	1.6	149.536	NA	NA	NA	NA	1.6	304.69	1.6	151.111	NA	NA	NA	NA	1.6	402.213	1.6	159.567	NA	NA	NA	NA
					27	1.664	1044.38	1.664	389.701	1.664	557.791	1.664	159.561	NA	NA	NA	NA	1.664	261.248	1.664	151.704	1.664	515.889	1.664	339.741	1.664	328.11	1.664	149.331	NA	NA	NA	NA	1.664	336.48	1.664	145.741	NA	NA	NA	NA	1.664	388.063	1.664	150.679	NA	NA	NA	NA
					28	1.728	1357.47	1.728	128.03	1.728	697.12	1.728	147.485	NA	NA	NA	NA	1.728	302.936	1.728	171.18	1.728	617.06	1.728	397.233	1.728	306.047	1.728	144.377	NA	NA	NA	NA	1.728	418.67	1.728	136.097	NA	NA	NA	NA	1.728	427.205	1.728	142.416	NA	NA	NA	NA
					29	1.792	1320.08	1.792	54.249	1.792	827.601	1.792	146.231	NA	NA	NA	NA	1.792	440.681	1.792	190.536	1.792	655.17	1.792	439.729	1.792	297.143	1.792	135.045	NA	NA	NA	NA	1.792	529.72	1.792	139.019	NA	NA	NA	NA	1.792	464.439	1.792	141.067	NA	NA	NA	NA
					30	1.856	1082.86	1.856	68.547	1.856	853.745	1.856	155.272	NA	NA	NA	NA	1.856	687.375	1.856	186.567	1.856	581.07	1.856	511.229	1.856	333.409	1.856	138.524	NA	NA	NA	NA	1.856	632.99	1.856	143.1	NA	NA	NA	NA	1.856	401.62	1.856	154	NA	NA	NA	NA
					31	1.92	842.665	1.92	137.921	1.92	814.674	1.92	155.291	NA	NA	NA	NA	1.92	900.558	1.92	167.828	1.92	461.06	1.92	547.668	1.92	377.111	1.92	151.951	NA	NA	NA	NA	1.92	687.569	1.92	136.195	NA	NA	NA	NA	1.92	294.116	1.92	167.21	NA	NA	NA	NA
					32	1.984	696.876	1.984	209.483	1.984	922.989	1.984	150.299	NA	NA	NA	NA	1.984	819.818	1.984	159.894	1.984	368.8	1.984	656.262	1.984	426.438	1.984	156.052	NA	NA	NA	NA	1.984	726.008	1.984	128.244	NA	NA	NA	NA	1.984	229.782	1.984	172.866	NA	NA	NA	NA
					33	NA	NA	2.048	198.703	2.048	1098.21	2.048	145.005	NA	NA	NA	NA	2.048	633.793	2.048	185.343	2.048	350.25	2.048	726.796	2.048	517.26	2.048	152.932	NA	NA	NA	NA	2.048	644.732	2.048	128.299	NA	NA	NA	NA	2.048	196.863	2.048	165.914	NA	NA	NA	NA
					34	NA	NA	2.112	143.209	2.112	1194.69	2.112	150.689	NA	NA	NA	NA	2.112	508.431	2.112	204.095	2.112	430.808	2.112	698.135	2.112	625.72	2.112	152.709	NA	NA	NA	NA	2.112	592.434	2.112	129.796	NA	NA	NA	NA	2.112	202.133	2.112	145.572	NA	NA	NA	NA
					35	NA	NA	NA	NA	2.176	1182.26	2.176	147.225	NA	NA	NA	NA	2.176	434.964	2.176	186.892	2.176	652.924	2.176	659.919	2.176	709.38	2.176	165.232	NA	NA	NA	NA	2.176	643.113	2.176	142.399	NA	NA	NA	NA	2.176	240.462	2.176	136.852	NA	NA	NA	NA
					36	NA	NA	NA	NA	2.24	1020.28	2.24	134.502	NA	NA	NA	NA	2.24	386.397	2.24	167.813	2.24	852.794	2.24	628.402	2.24	719.4	2.24	166.279	NA	NA	NA	NA	2.24	735.505	2.24	142.564	NA	NA	NA	NA	2.24	317.452	2.24	138.918	NA	NA	NA	NA
					37	NA	NA	NA	NA	2.304	983.127	2.304	121.734	NA	NA	NA	NA	2.304	367.629	2.304	180.723	2.304	795.166	2.304	690.656	2.304	669.483	2.304	162.435	NA	NA	NA	NA	2.304	597.825	2.304	138.48	NA	NA	NA	NA	2.304	444.547	2.304	137.572	NA	NA	NA	NA
					38	NA	NA	NA	NA	2.368	1024.9	2.368	115.122	NA	NA	NA	NA	2.368	431.211	2.368	187.375	2.368	887.276	2.368	841.99	2.368	620.625	2.368	152.707	NA	NA	NA	NA	2.368	409.979	2.368	149.452	NA	NA	NA	NA	2.368	608.58	2.368	136.486	NA	NA	NA	NA
					39	NA	NA	NA	NA	2.432	1044.06	2.432	126.945	NA	NA	NA	NA	2.432	535.765	2.432	171.553	2.432	894.32	2.432	1069.34	2.432	609.367	2.432	151.495	NA	NA	NA	NA	2.432	257.784	2.432	155.207	NA	NA	NA	NA	2.432	658.24	2.432	148.8	NA	NA	NA	NA
					40	NA	NA	NA	NA	2.496	1025.18	2.496	143.652	NA	NA	NA	NA	2.496	716.081	2.496	165.725	2.496	701.67	2.496	1085.21	2.496	709.052	2.496	148.469	NA	NA	NA	NA	2.496	187.299	2.496	147.786	NA	NA	NA	NA	2.496	585.66	2.496	147.981	NA	NA	NA	NA
					41	NA	NA	NA	NA	2.56	1057.82	2.56	152.835	NA	NA	NA	NA	2.56	983.41	2.56	163.736	2.56	495.531	2.56	844.868	2.56	879.425	2.56	144.821	NA	NA	NA	NA	2.56	171.171	2.56	141.792	NA	NA	NA	NA	2.56	413.372	2.56	131.136	NA	NA	NA	NA
					42	NA	NA	NA	NA	2.624	1031.8	2.624	149.69	NA	NA	NA	NA	2.624	1252.09	2.624	169.123	NA	NA	NA	NA	2.624	973.086	2.624	154.895	NA	NA	NA	NA	2.624	197.668	2.624	146.43	NA	NA	NA	NA	2.624	266.58	2.624	129.728	NA	NA	NA	NA
					43	NA	NA	NA	NA	2.688	934.665	2.688	149.018	NA	NA	NA	NA	2.688	1463.44	2.688	159.328	NA	NA	NA	NA	NA	NA	2.688	171.685	NA	NA	NA	NA	2.688	241.749	2.688	149.02	NA	NA	NA	NA	2.688	213.754	2.688	139.075	NA	NA	NA	NA
					44	NA	NA	NA	NA	2.752	923.797	2.752	155.663	NA	NA	NA	NA	2.752	1373.15	2.752	155.636	NA	NA	NA	NA	NA	NA	2.752	175.185	NA	NA	NA	NA	2.752	305.74	2.752	139.67	NA	NA	NA	NA	2.752	218.669	2.752	136.456	NA	NA	NA	NA
					45	NA	NA	NA	NA	2.816	811.024	2.816	164.63	NA	NA	NA	NA	2.816	1042.81	2.816	157.567	NA	NA	NA	NA	NA	NA	2.816	169.725	NA	NA	NA	NA	2.816	413.659	2.816	131.98	NA	NA	NA	NA	2.816	269.581	2.816	132.291	NA	NA	NA	NA
					46	NA	NA	NA	NA	2.88	741.357	2.88	177.518	NA	NA	NA	NA	2.88	825.207	2.88	161.168	NA	NA	NA	NA	NA	NA	2.88	162.224	NA	NA	NA	NA	2.88	526.436	2.88	140.35	NA	NA	NA	NA	2.88	338.178	2.88	131.624	NA	NA	NA	NA
					47	NA	NA	NA	NA	2.944	716.006	2.944	186.114	NA	NA	NA	NA	2.944	612.496	2.944	173.156	NA	NA	NA	NA	NA	NA	2.944	150.266	NA	NA	NA	NA	2.944	641.976	2.944	152.41	NA	NA	NA	NA	2.944	392.616	2.944	138.205	NA	NA	NA	NA
					48	NA	NA	NA	NA	3.008	718.625	3.008	177.77	NA	NA	NA	NA	3.008	582.285	3.008	170.699	NA	NA	NA	NA	NA	NA	3.008	158.118	NA	NA	NA	NA	3.008	768.674	3.008	149.65	NA	NA	NA	NA	3.008	395.866	3.008	137.3	NA	NA	NA	NA
					49	NA	NA	NA	NA	3.072	680.584	3.072	162.568	NA	NA	NA	NA	3.072	617.309	3.072	161.142	NA	NA	NA	NA	NA	NA	3.072	145.308	NA	NA	NA	NA	3.072	925.61	3.072	136.12	NA	NA	NA	NA	3.072	352.455	NA	NA	NA	NA	NA	NA
					50	NA	NA	NA	NA	3.136	547.511	3.136	154.251	NA	NA	NA	NA	3.136	673.982	3.136	163.958	NA	NA	NA	NA	NA	NA	3.136	137.371	NA	NA	NA	NA	3.136	984.441	3.136	132.45	NA	NA	NA	NA	3.136	298.679	NA	NA	NA	NA	NA	NA
					51	NA	NA	NA	NA	NA	NA	3.2	152.448	NA	NA	NA	NA	3.2	759.074	3.2	172.325	NA	NA	NA	NA	NA	NA	3.2	149.962	NA	NA	NA	NA	3.2	890.61	3.2	140.88	NA	NA	NA	NA	3.2	240.544	NA	NA	NA	NA	NA	NA
					52	NA	NA	NA	NA	NA	NA	3.264	137.917	NA	NA	NA	NA	3.264	803.087	3.264	160.655	NA	NA	NA	NA	NA	NA	3.264	167.04	NA	NA	NA	NA	3.264	629.482	3.264	149.94	NA	NA	NA	NA	3.264	201.457	NA	NA	NA	NA	NA	NA
					53	NA	NA	NA	NA	NA	NA	3.328	153.275	NA	NA	NA	NA	3.328	873.85	3.328	154.781	NA	NA	NA	NA	NA	NA	3.328	168.644	NA	NA	NA	NA	3.328	415.16	3.328	147.61	NA	NA	NA	NA	3.328	217.873	NA	NA	NA	NA	NA	NA
					54	NA	NA	NA	NA	NA	NA	3.392	169.379	NA	NA	NA	NA	3.392	952.18	3.392	168.466	NA	NA	NA	NA	NA	NA	3.392	150.368	NA	NA	NA	NA	3.392	380.9	3.392	139.06	NA	NA	NA	NA	3.392	254.483	NA	NA	NA	NA	NA	NA
					55	NA	NA	NA	NA	NA	NA	3.456	170.718	NA	NA	NA	NA	3.456	860.12	3.456	186.421	NA	NA	NA	NA	NA	NA	3.456	141.097	NA	NA	NA	NA	3.456	345.64	3.456	132.57	NA	NA	NA	NA	3.456	324.012	NA	NA	NA	NA	NA	NA
					56	NA	NA	NA	NA	NA	NA	3.52	149.504	NA	NA	NA	NA	3.52	717.24	3.52	193.597	NA	NA	NA	NA	NA	NA	3.52	138.446	NA	NA	NA	NA	NA	NA	3.52	129.49	NA	NA	NA	NA	3.52	432.153	NA	NA	NA	NA	NA	NA
					57	NA	NA	NA	NA	NA	NA	3.584	137.682	NA	NA	NA	NA	3.584	629.58	3.584	184.267	NA	NA	NA	NA	NA	NA	3.584	136.722	NA	NA	NA	NA	NA	NA	3.584	130.49	NA	NA	NA	NA	3.584	487.704	NA	NA	NA	NA	NA	NA
					58	NA	NA	NA	NA	NA	NA	3.648	134.383	NA	NA	NA	NA	3.648	649.39	3.648	173.033	NA	NA	NA	NA	NA	NA	3.648	150.354	NA	NA	NA	NA	NA	NA	3.648	132.47	NA	NA	NA	NA	3.648	427.795	NA	NA	NA	NA	NA	NA
					59	NA	NA	NA	NA	NA	NA	3.712	138.922	NA	NA	NA	NA	3.712	892.14	3.712	174.364	NA	NA	NA	NA	NA	NA	3.712	179.133	NA	NA	NA	NA	NA	NA	3.712	138.41	NA	NA	NA	NA	3.712	424.892	NA	NA	NA	NA	NA	NA
					60	NA	NA	NA	NA	NA	NA	3.776	134.39	NA	NA	NA	NA	3.776	1395.29	3.776	178.956	NA	NA	NA	NA	NA	NA	3.776	183.159	NA	NA	NA	NA	NA	NA	3.776	143.49	NA	NA	NA	NA	3.776	463.487	NA	NA	NA	NA	NA	NA
					61	NA	NA	NA	NA	NA	NA	3.84	121.204	NA	NA	NA	NA	3.84	1801.93	3.84	165.401	NA	NA	NA	NA	NA	NA	3.84	186.663	NA	NA	NA	NA	NA	NA	3.84	138.12	NA	NA	NA	NA	3.84	534.953	NA	NA	NA	NA	NA	NA
					62	NA	NA	NA	NA	NA	NA	3.904	117.453	NA	NA	NA	NA	3.904	1816.68	3.904	152.152	NA	NA	NA	NA	NA	NA	3.904	171.799	NA	NA	NA	NA	NA	NA	3.904	133.47	NA	NA	NA	NA	3.904	603.367	NA	NA	NA	NA	NA	NA
					63	NA	NA	NA	NA	NA	NA	3.968	121.711	NA	NA	NA	NA	3.968	1748.83	3.968	162.487	NA	NA	NA	NA	NA	NA	3.968	147.904	NA	NA	NA	NA	NA	NA	3.968	132.06	NA	NA	NA	NA	3.968	687.409	NA	NA	NA	NA	NA	NA
					64	NA	NA	NA	NA	NA	NA	4.032	124.241	NA	NA	NA	NA	4.032	1465.03	4.032	161.191	NA	NA	NA	NA	NA	NA	4.032	135.407	NA	NA	NA	NA	NA	NA	4.032	127.53	NA	NA	NA	NA	4.032	736.917	NA	NA	NA	NA	NA	NA
					65	NA	NA	NA	NA	NA	NA	4.096	127.832	NA	NA	NA	NA	4.096	1145.79	4.096	152.99	NA	NA	NA	NA	NA	NA	NA	NA	NA	NA	NA	NA	NA	NA	4.096	128.45	NA	NA	NA	NA	4.096	834.389	NA	NA	NA	NA	NA	NA
					66	NA	NA	NA	NA	NA	NA	4.16	117.241	NA	NA	NA	NA	4.16	991.454	4.16	167.112	NA	NA	NA	NA	NA	NA	NA	NA	NA	NA	NA	NA	NA	NA	4.16	129.53	NA	NA	NA	NA	4.16	986.348	NA	NA	NA	NA	NA	NA
					67	NA	NA	NA	NA	NA	NA	4.224	108.172	NA	NA	NA	NA	4.224	840.676	4.224	182.972	NA	NA	NA	NA	NA	NA	NA	NA	NA	NA	NA	NA	NA	NA	4.224	128.98	NA	NA	NA	NA	4.224	984.68	NA	NA	NA	NA	NA	NA
					68	NA	NA	NA	NA	NA	NA	4.288	106.26	NA	NA	NA	NA	NA	NA	4.288	181.707	NA	NA	NA	NA	NA	NA	NA	NA	NA	NA	NA	NA	NA	NA	4.288	134.9	NA	NA	NA	NA	4.288	771.98	NA	NA	NA	NA	NA	NA
					69	NA	NA	NA	NA	NA	NA	4.352	97.024	NA	NA	NA	NA	NA	NA	4.352	179.723	NA	NA	NA	NA	NA	NA	NA	NA	NA	NA	NA	NA	NA	NA	4.352	136.57	NA	NA	NA	NA	4.352	499.33	NA	NA	NA	NA	NA	NA
					70	NA	NA	NA	NA	NA	NA	NA	NA	NA	NA	NA	NA	NA	NA	4.416	166.143	NA	NA	NA	NA	NA	NA	NA	NA	NA	NA	NA	NA	NA	NA	4.416	132.51	NA	NA	NA	NA	4.416	351.55	NA	NA	NA	NA	NA	NA
					71	NA	NA	NA	NA	NA	NA	NA	NA	NA	NA	NA	NA	NA	NA	4.48	149.512	NA	NA	NA	NA	NA	NA	NA	NA	NA	NA	NA	NA	NA	NA	4.48	132	NA	NA	NA	NA	4.48	451.09	NA	NA	NA	NA	NA	NA
					72	NA	NA	NA	NA	NA	NA	NA	NA	NA	NA	NA	NA	NA	NA	4.544	150.565	NA	NA	NA	NA	NA	NA	NA	NA	NA	NA	NA	NA	NA	NA	4.544	134.45	NA	NA	NA	NA	4.544	755.05	NA	NA	NA	NA	NA	NA
					73	NA	NA	NA	NA	NA	NA	NA	NA	NA	NA	NA	NA	NA	NA	4.608	161.07	NA	NA	NA	NA	NA	NA	NA	NA	NA	NA	NA	NA	NA	NA	4.608	140.92	NA	NA	NA	NA	4.608	941.07	NA	NA	NA	NA	NA	NA
					74	NA	NA	NA	NA	NA	NA	NA	NA	NA	NA	NA	NA	NA	NA	NA	NA	NA	NA	NA	NA	NA	NA	NA	NA	NA	NA	NA	NA	NA	NA	4.672	136.056	NA	NA	NA	NA	4.672	893.35	NA	NA	NA	NA	NA	NA
					75	NA	NA	NA	NA	NA	NA	NA	NA	NA	NA	NA	NA	NA	NA	NA	NA	NA	NA	NA	NA	NA	NA	NA	NA	NA	NA	NA	NA	NA	NA	4.736	133.008	NA	NA	NA	NA	NA	NA	NA	NA	NA	NA	NA	NA
					76	NA	NA	NA	NA	NA	NA	NA	NA	NA	NA	NA	NA	NA	NA	NA	NA	NA	NA	NA	NA	NA	NA	NA	NA	NA	NA	NA	NA	NA	NA	4.8	134.839	NA	NA	NA	NA	NA	NA	NA	NA	NA	NA	NA	NA
					77	NA	NA	NA	NA	NA	NA	NA	NA	NA	NA	NA	NA	NA	NA	NA	NA	NA	NA	NA	NA	NA	NA	NA	NA	NA	NA	NA	NA	NA	NA	4.864	141.748	NA	NA	NA	NA	NA	NA	NA	NA	NA	NA	NA	NA
					78	NA	NA	NA	NA	NA	NA	NA	NA	NA	NA	NA	NA	NA	NA	NA	NA	NA	NA	NA	NA	NA	NA	NA	NA	NA	NA	NA	NA	NA	NA	4.928	138.69	NA	NA	NA	NA	NA	NA	NA	NA	NA	NA	NA	NA
					79	NA	NA	NA	NA	NA	NA	NA	NA	NA	NA	NA	NA	NA	NA	NA	NA	NA	NA	NA	NA	NA	NA	NA	NA	NA	NA	NA	NA	NA	NA	4.992	125.641	NA	NA	NA	NA	NA	NA	NA	NA	NA	NA	NA	NA
					80	NA	NA	NA	NA	NA	NA	NA	NA	NA	NA	NA	NA	NA	NA	NA	NA	NA	NA	NA	NA	NA	NA	NA	NA	NA	NA	NA	NA	NA	NA	5.056	130.864	NA	NA	NA	NA	NA	NA	NA	NA	NA	NA	NA	NA
					81	NA	NA	NA	NA	NA	NA	NA	NA	NA	NA	NA	NA	NA	NA	NA	NA	NA	NA	NA	NA	NA	NA	NA	NA	NA	NA	NA	NA	NA	NA	5.12	141.041	NA	NA	NA	NA	NA	NA	NA	NA	NA	NA	NA	NA
					82	NA	NA	NA	NA	NA	NA	NA	NA	NA	NA	NA	NA	NA	NA	NA	NA	NA	NA	NA	NA	NA	NA	NA	NA	NA	NA	NA	NA	NA	NA	5.184	144.016	NA	NA	NA	NA	NA	NA	NA	NA	NA	NA	NA	NA
					83	NA	NA	NA	NA	NA	NA	NA	NA	NA	NA	NA	NA	NA	NA	NA	NA	NA	NA	NA	NA	NA	NA	NA	NA	NA	NA	NA	NA	NA	NA	5.248	137.786	NA	NA	NA	NA	NA	NA	NA	NA	NA	NA	NA	NA
					84	NA	NA	NA	NA	NA	NA	NA	NA	NA	NA	NA	NA	NA	NA	NA	NA	NA	NA	NA	NA	NA	NA	NA	NA	NA	NA	NA	NA	NA	NA	5.312	125.66	NA	NA	NA	NA	NA	NA	NA	NA	NA	NA	NA	NA
					85	NA	NA	NA	NA	NA	NA	NA	NA	NA	NA	NA	NA	NA	NA	NA	NA	NA	NA	NA	NA	NA	NA	NA	NA	NA	NA	NA	NA	NA	NA	5.376	133.536	NA	NA	NA	NA	NA	NA	NA	NA	NA	NA	NA	NA
					86	NA	NA	NA	NA	NA	NA	NA	NA	NA	NA	NA	NA	NA	NA	NA	NA	NA	NA	NA	NA	NA	NA	NA	NA	NA	NA	NA	NA	NA	NA	5.44	149.896	NA	NA	NA	NA	NA	NA	NA	NA	NA	NA	NA	NA
					87	NA	NA	NA	NA	NA	NA	NA	NA	NA	NA	NA	NA	NA	NA	NA	NA	NA	NA	NA	NA	NA	NA	NA	NA	NA	NA	NA	NA	NA	NA	5.504	141.428	NA	NA	NA	NA	NA	NA	NA	NA	NA	NA	NA	NA
					88	NA	NA	NA	NA	NA	NA	NA	NA	NA	NA	NA	NA	NA	NA	NA	NA	NA	NA	NA	NA	NA	NA	NA	NA	NA	NA	NA	NA	NA	NA	5.568	132.536	NA	NA	NA	NA	NA	NA	NA	NA	NA	NA	NA	NA
					89	NA	NA	NA	NA	NA	NA	NA	NA	NA	NA	NA	NA	NA	NA	NA	NA	NA	NA	NA	NA	NA	NA	NA	NA	NA	NA	NA	NA	NA	NA	5.632	125.424	NA	NA	NA	NA	NA	NA	NA	NA	NA	NA	NA	NA
					90	NA	NA	NA	NA	NA	NA	NA	NA	NA	NA	NA	NA	NA	NA	NA	NA	NA	NA	NA	NA	NA	NA	NA	NA	NA	NA	NA	NA	NA	NA	5.696	117.188	NA	NA	NA	NA	NA	NA	NA	NA	NA	NA	NA	NA
					91	NA	NA	NA	NA	NA	NA	NA	NA	NA	NA	NA	NA	NA	NA	NA	NA	NA	NA	NA	NA	NA	NA	NA	NA	NA	NA	NA	NA	NA	NA	5.76	127.471	NA	NA	NA	NA	NA	NA	NA	NA	NA	NA	NA	NA
					92	NA	NA	NA	NA	NA	NA	NA	NA	NA	NA	NA	NA	NA	NA	NA	NA	NA	NA	NA	NA	NA	NA	NA	NA	NA	NA	NA	NA	NA	NA	5.824	140.53	NA	NA	NA	NA	NA	NA	NA	NA	NA	NA	NA	NA
					93	NA	NA	NA	NA	NA	NA	NA	NA	NA	NA	NA	NA	NA	NA	NA	NA	NA	NA	NA	NA	NA	NA	NA	NA	NA	NA	NA	NA	NA	NA	5.888	139.387	NA	NA	NA	NA	NA	NA	NA	NA	NA	NA	NA	NA
					94	NA	NA	NA	NA	NA	NA	NA	NA	NA	NA	NA	NA	NA	NA	NA	NA	NA	NA	NA	NA	NA	NA	NA	NA	NA	NA	NA	NA	NA	NA	5.952	140.029	NA	NA	NA	NA	NA	NA	NA	NA	NA	NA	NA	NA
					95	NA	NA	NA	NA	NA	NA	NA	NA	NA	NA	NA	NA	NA	NA	NA	NA	NA	NA	NA	NA	NA	NA	NA	NA	NA	NA	NA	NA	NA	NA	6.016	146.789	NA	NA	NA	NA	NA	NA	NA	NA	NA	NA	NA	NA
					96	NA	NA	NA	NA	NA	NA	NA	NA	NA	NA	NA	NA	NA	NA	NA	NA	NA	NA	NA	NA	NA	NA	NA	NA	NA	NA	NA	NA	NA	NA	6.08	146.863	NA	NA	NA	NA	NA	NA	NA	NA	NA	NA	NA	NA
					97	NA	NA	NA	NA	NA	NA	NA	NA	NA	NA	NA	NA	NA	NA	NA	NA	NA	NA	NA	NA	NA	NA	NA	NA	NA	NA	NA	NA	NA	NA	6.144	138.946	NA	NA	NA	NA	NA	NA	NA	NA	NA	NA	NA	NA
					98	NA	NA	NA	NA	NA	NA	NA	NA	NA	NA	NA	NA	NA	NA	NA	NA	NA	NA	NA	NA	NA	NA	NA	NA	NA	NA	NA	NA	NA	NA	6.208	138.053	NA	NA	NA	NA	NA	NA	NA	NA	NA	NA	NA	NA
					99	NA	NA	NA	NA	NA	NA	NA	NA	NA	NA	NA	NA	NA	NA	NA	NA	NA	NA	NA	NA	NA	NA	NA	NA	NA	NA	NA	NA	NA	NA	6.272	136.281	NA	NA	NA	NA	NA	NA	NA	NA	NA	NA	NA	NA
					100	NA	NA	NA	NA	NA	NA	NA	NA	NA	NA	NA	NA	NA	NA	NA	NA	NA	NA	NA	NA	NA	NA	NA	NA	NA	NA	NA	NA	NA	NA	6.336	134.976	NA	NA	NA	NA	NA	NA	NA	NA	NA	NA	NA	NA
					101	NA	NA	NA	NA	NA	NA	NA	NA	NA	NA	NA	NA	NA	NA	NA	NA	NA	NA	NA	NA	NA	NA	NA	NA	NA	NA	NA	NA	NA	NA	6.4	136.395	NA	NA	NA	NA	NA	NA	NA	NA	NA	NA	NA	NA
					102	NA	NA	NA	NA	NA	NA	NA	NA	NA	NA	NA	NA	NA	NA	NA	NA	NA	NA	NA	NA	NA	NA	NA	NA	NA	NA	NA	NA	NA	NA	6.464	144.148	NA	NA	NA	NA	NA	NA	NA	NA	NA	NA	NA	NA
					103	NA	NA	NA	NA	NA	NA	NA	NA	NA	NA	NA	NA	NA	NA	NA	NA	NA	NA	NA	NA	NA	NA	NA	NA	NA	NA	NA	NA	NA	NA	6.528	147.873	NA	NA	NA	NA	NA	NA	NA	NA	NA	NA	NA	NA
[truncated: 380 more columns]

## Sheet: Gle1_KR
Gle1-GFP						1								2								3								4								5								6
Nup60K467R						Ic				Ir		Ibg		Ic				Ir		Ibg		Ic				Ir		Ibg		Ic				Ir		Ibg		Ic				Ir		Ibg		Ic
							324.469				353.132		172.354		261.885				214.799		173.442		258.829				251.028		157.894		289.703				237.702		168.189		265.095				246.406		156.275		258.291
							152.115								88.4432								100.935								121.514								108.819								101.472
	average	median	SEM	n		Relative accumulation (RA)					180.778			Relative accumulation (RA)					41.3571			Relative accumulation (RA)					93.134			Relative accumulation (RA)					69.513			Relative accumulation (RA)					90.1306			Relative accumulation (RA)
RA:	1.92378	1.57589	0.341724	10		0.841446								2.13853								1.08376								1.74808								1.20735								1.46871
	p-value
	0.0106896
						181126_VisSt_Gle1-GFP_TRNM92.2.1_01_01_Crop_1GFP_x_lc	181126_VisSt_Gle1-GFP_TRNM92.2.1_01_01_Crop_1GFP_y_lc	181126_VisSt_Gle1-GFP_TRNM92.2.1_01_01_Crop_1mCh_x_cap	181126_VisSt_Gle1-GFP_TRNM92.2.1_01_01_Crop_1mCh_y_cap	181126_VisSt_Gle1-GFP_TRNM92.2.1_01_01_Crop_1GFP_x_lr	181126_VisSt_Gle1-GFP_TRNM92.2.1_01_01_Crop_1GFP_y_lr	181126_VisSt_Gle1-GFP_TRNM92.2.1_01_01_Crop_1GFP_x_bg	181126_VisSt_Gle1-GFP_TRNM92.2.1_01_01_Crop_1GFP_y_bg	181126_VisSt_Gle1-GFP_TRNM92.2.1_01_01_Crop_2GFP_x_lc	181126_VisSt_Gle1-GFP_TRNM92.2.1_01_01_Crop_2GFP_y_lc	181126_VisSt_Gle1-GFP_TRNM92.2.1_01_01_Crop_2mCh_x_cap	181126_VisSt_Gle1-GFP_TRNM92.2.1_01_01_Crop_2mCh_y_cap	181126_VisSt_Gle1-GFP_TRNM92.2.1_01_01_Crop_2GFP_x_lr	181126_VisSt_Gle1-GFP_TRNM92.2.1_01_01_Crop_2GFP_y_lr	181126_VisSt_Gle1-GFP_TRNM92.2.1_01_01_Crop_2GFP_x_bg	181126_VisSt_Gle1-GFP_TRNM92.2.1_01_01_Crop_2GFP_y_bg	181126_VisSt_Gle1-GFP_TRNM92.2.1_01_10_Crop_1GFP_x_lc	181126_VisSt_Gle1-GFP_TRNM92.2.1_01_10_Crop_1GFP_y_lc	181126_VisSt_Gle1-GFP_TRNM92.2.1_01_10_Crop_1mCh_x_cap	181126_VisSt_Gle1-GFP_TRNM92.2.1_01_10_Crop_1mCh_y_cap	181126_VisSt_Gle1-GFP_TRNM92.2.1_01_10_Crop_1GFP_x_lr	181126_VisSt_Gle1-GFP_TRNM92.2.1_01_10_Crop_1GFP_y_lr	181126_VisSt_Gle1-GFP_TRNM92.2.1_01_10_Crop_1GFP_x_bg	181126_VisSt_Gle1-GFP_TRNM92.2.1_01_10_Crop_1GFP_y_bg	181126_VisSt_Gle1-GFP_TRNM92.2.1_01_10_Crop_2GFP_x_lc	181126_VisSt_Gle1-GFP_TRNM92.2.1_01_10_Crop_2GFP_y_lc	181126_VisSt_Gle1-GFP_TRNM92.2.1_01_10_Crop_2mCh_x_cap	181126_VisSt_Gle1-GFP_TRNM92.2.1_01_10_Crop_2mCh_y_cap	181126_VisSt_Gle1-GFP_TRNM92.2.1_01_10_Crop_2GFP_x_lr	181126_VisSt_Gle1-GFP_TRNM92.2.1_01_10_Crop_2GFP_y_lr	181126_VisSt_Gle1-GFP_TRNM92.2.1_01_10_Crop_2GFP_x_bg	181126_VisSt_Gle1-GFP_TRNM92.2.1_01_10_Crop_2GFP_y_bg	181126_VisSt_Gle1-GFP_TRNM92.2.1_01_10_Crop_3GFP_x_lc	181126_VisSt_Gle1-GFP_TRNM92.2.1_01_10_Crop_3GFP_y_lc	181126_VisSt_Gle1-GFP_TRNM92.2.1_01_10_Crop_3mCh_x_cap	181126_VisSt_Gle1-GFP_TRNM92.2.1_01_10_Crop_3mCh_y_cap	181126_VisSt_Gle1-GFP_TRNM92.2.1_01_10_Crop_3GFP_x_lr	181126_VisSt_Gle1-GFP_TRNM92.2.1_01_10_Crop_3GFP_y_lr	181126_VisSt_Gle1-GFP_TRNM92.2.1_01_10_Crop_3GFP_x_bg	181126_VisSt_Gle1-GFP_TRNM92.2.1_01_10_Crop_3GFP_y_bg	181126_VisSt_Gle1-GFP_TRNM92.2.1_01_10_Crop_4GFP_x_lc	181126_VisSt_Gle1-GFP_TRNM92.2.1_01_10_Crop_4GFP_y_lc	181126_VisSt_Gle1-GFP_TRNM92.2.1_01_10_Crop_4mCh_x_cap	181126_VisSt_Gle1-GFP_TRNM92.2.1_01_10_Crop_4mCh_y_cap
					1	0	357	0	108	0	367	0	182	0	300	0	102	0	244	0	161	0	235	0	184	0	289	0	154	0	353	0	90	0	286	0	151	0	358	0	142	0	358	0	140	0	186	0	130
					2	0.064	346.537	0.064	127.962	0.064	351.531	0.064	183.833	0.064	289.548	0.064	102.047	0.064	243.509	0.064	163.989	0.064	234.389	0.064	272.253	0.064	301.854	0.064	163.123	0.064	310.123	0.064	92.964	0.064	282.492	0.064	165.763	0.064	323.833	0.064	221.588	0.064	341.837	0.064	147.446	0.064	202.346	0.064	142.244
					3	0.128	331.904	0.128	163.901	0.128	328.871	0.128	168.407	0.128	273.346	0.128	97.933	0.128	226.424	0.128	171.221	0.128	237.69	0.128	338.831	0.128	302.32	0.128	165.508	0.128	280.639	0.128	100.055	0.128	287.037	0.128	174.915	0.128	261.642	0.128	317.536	0.128	301.814	0.128	174.309	0.128	241.759	0.128	150.589
					4	0.192	295.523	0.192	208.766	0.192	275.18	0.192	192.24	0.192	256.402	0.192	95.425	0.192	221.47	0.192	161.646	0.192	244.92	0.192	361.243	0.192	294.242	0.192	157.625	0.192	253.406	0.192	104.909	0.192	283.6	0.192	173.582	0.192	228.563	0.192	413.872	0.192	268.99	0.192	173.097	0.192	290.032	0.192	183.578
					5	0.256	230.209	0.256	256.801	0.256	263.799	0.256	206.086	0.256	248.591	0.256	96.277	0.256	231.957	0.256	165.095	0.256	264.45	0.256	365.56	0.256	296.624	0.256	148.603	0.256	246.189	0.256	99.669	0.256	270.967	0.256	167.236	0.256	224.687	0.256	466.596	0.256	288.32	0.256	154.623	0.256	335.361	0.256	227.319
					6	0.32	170.149	0.32	316.899	0.32	326.811	0.32	183.808	0.32	242.459	0.32	102.034	0.32	252.529	0.32	171.714	0.32	269.086	0.32	348.857	0.32	271.129	0.32	153.207	0.32	242.263	0.32	100.214	0.32	268.306	0.32	170.972	0.32	239.213	0.32	449.288	0.32	318.688	0.32	148.438	0.32	370.895	0.32	237.397
					7	0.384	133.209	0.384	403.395	0.384	336.354	0.384	177.134	0.384	247.018	0.384	109.618	0.384	240.363	0.384	177.763	0.384	282.773	0.384	313.801	0.384	239.552	0.384	155.173	0.384	245.176	0.384	103.6	0.384	272.304	0.384	164.89	0.384	258.92	0.384	385.78	0.384	334.26	0.384	135.986	0.384	382.237	0.384	221.232
					8	0.448	133.651	0.448	474.95	0.448	319.573	0.448	178.779	0.448	251.668	0.448	118.686	0.448	209.624	0.448	168.446	0.448	279.831	0.448	271.398	0.448	255.591	0.448	144.878	0.448	273.52	0.448	105.631	0.448	254.715	0.448	158.168	0.448	287.211	0.448	302.497	0.448	289.78	0.448	130.765	0.448	324.428	0.448	219.093
					9	0.512	184.016	0.512	492.871	0.512	353.129	0.512	178.485	0.512	262.046	0.512	124.291	0.512	197.209	0.512	157.661	0.512	274.325	0.512	221.173	0.512	269.719	0.512	137.165	0.512	307.051	0.512	114.708	0.512	227.872	0.512	161.337	0.512	300.08	0.512	197.615	0.512	254.24	0.512	147.135	0.512	280.831	0.512	234.605
					10	0.576	306.464	0.576	461.156	0.576	382.529	0.576	183.765	0.576	275.333	0.576	128.159	0.576	184.346	0.576	156.377	0.576	288.784	0.576	331.23	0.576	277.502	0.576	153.87	0.576	312.509	0.576	113.821	0.576	205.414	0.576	163.063	0.576	300.489	0.576	155.508	0.576	232.96	0.576	151.86	0.576	242.601	0.576	234.039
					11	0.64	412.62	0.64	410.532	0.64	400.455	0.64	184.633	0.64	237.828	0.64	145.926	0.64	193.055	0.64	160.219	0.64	307.592	0.64	382.926	0.64	296.285	0.64	167.849	0.64	320.149	0.64	116.754	0.64	180.754	0.64	163.241	0.64	279.652	0.64	163.192	0.64	227.68	0.64	159.008	0.64	211.28	0.64	263.902
					12	0.704	530.641	0.704	385.014	0.704	408.996	0.704	179.18	0.704	219.345	0.704	135.709	0.704	208.405	0.704	163.678	0.704	311.034	0.704	471.213	0.704	289.97	0.704	168.66	0.704	337.668	0.704	114.712	0.704	179.669	0.704	169.023	0.704	255.56	0.704	175.647	0.704	230	0.704	159.992	0.704	230.328	0.704	283.031
					13	0.768	605.607	0.768	328.177	0.768	387.5	0.768	180.599	0.768	232.335	0.768	126.108	0.768	220.35	0.768	171.833	0.768	304.196	0.768	493.204	0.768	270.245	0.768	158.458	0.768	321.907	0.768	112.058	0.768	190.844	0.768	180.364	0.768	245.952	0.768	188.727	0.768	237.56	0.768	168.093	0.768	293.131	0.768	252.911
					14	0.832	647.03	0.832	302.68	0.832	347.56	0.832	196.522	0.832	245.287	0.832	117.175	0.832	210.739	0.832	182.67	0.832	299.037	0.832	482.105	0.832	269.002	0.832	144.042	0.832	273.789	0.832	116.02	0.832	225.011	0.832	186.801	0.832	248.656	0.832	215.747	0.832	275.72	0.832	163.298	0.832	320.481	0.832	209.508
					15	0.896	627.798	0.896	321.24	0.896	334.28	0.896	202.746	0.896	280.192	0.896	145.357	0.896	188.471	0.896	179.038	0.896	298.046	0.896	428.184	0.896	265.716	0.896	137.074	0.896	265.207	0.896	119.95	0.896	248.109	0.896	184.621	0.896	265.111	0.896	214.287	0.896	348.44	0.896	145.627	0.896	281.997	0.896	156.428
					16	0.96	528.659	0.96	354.28	0.96	324.6	0.96	184.402	0.96	325.287	0.96	205.092	0.96	174.041	0.96	168.807	0.96	292.596	0.96	333.494	0.96	242.364	0.96	133.336	0.96	274.988	0.96	118.3	0.96	264.941	0.96	171.93	0.96	262.371	0.96	239.991	0.96	419.1	0.96	143.9	0.96	247.389	0.96	118.303
					17	1.024	466.437	1.024	403.92	1.024	315.44	1.024	175.143	1.024	356.405	1.024	302.201	1.024	173.85	1.024	164.239	1.024	266.085	1.024	301.246	1.024	221.625	1.024	142.728	1.024	294.346	1.024	124.737	1.024	277.865	1.024	155.169	1.024	261.38	1.024	257.24	1.024	431.972	1.024	141.125	1.024	235.96	1.024	113.084
					18	1.088	423.652	1.088	464.12	1.088	284.6	1.088	178.613	1.088	367.34	1.088	406.233	1.088	193.946	1.088	162.761	1.088	243.754	1.088	267.488	1.088	228.415	1.088	155.343	1.088	286.348	1.088	120.365	1.088	265.735	1.088	156.312	1.088	265.66	1.088	340.52	1.088	409.848	1.088	170.998	1.088	206.045	1.088	102.771
					19	1.152	366.422	1.152	502.12	1.152	252.96	1.152	172.524	1.152	328.331	1.152	455.534	1.152	192.536	1.152	161.742	1.152	224.458	1.152	461.497	1.152	224.384	1.152	163.534	1.152	262.092	1.152	105.612	1.152	238.726	1.152	163.64	1.152	259.22	1.152	399.14	1.152	348.955	1.152	177.797	1.152	184.359	1.152	92.555
					20	1.216	319.374	1.216	543.64	1.216	233.72	1.216	160.503	1.216	300.292	1.216	459.582	1.216	190.81	1.216	164.959	1.216	218.634	1.216	660.148	1.216	207.139	1.216	159.468	1.216	252.11	1.216	103.406	1.216	224.615	1.216	172.508	1.216	239.84	1.216	402.12	1.216	288.695	1.216	165.364	1.216	182.536	1.216	86.051
					21	1.28	290.543	1.28	524.92	1.28	238.56	1.28	159.037	1.28	269.361	1.28	372.532	1.28	181.028	1.28	180.286	1.28	265.108	1.28	863.991	1.28	198.268	1.28	160.345	1.28	273.699	1.28	113.845	1.28	228.009	1.28	173.481	1.28	229.44	1.28	359.92	1.28	245.385	1.28	157.25	1.28	174.113	1.28	86.629
					22	1.344	269.976	1.344	532.2	1.344	270.24	1.344	158.763	1.344	233.686	1.344	254.539	1.344	189.988	1.344	190.905	1.344	309.92	1.344	898.471	1.344	187.874	1.344	153.347	1.344	311.714	1.344	125.607	1.344	236.9	1.344	166.309	1.344	236.6	1.344	292.14	1.344	224.869	1.344	152.27	NA	NA	NA	NA
					23	1.408	268.258	1.408	558.76	1.408	311.28	1.408	157.503	1.408	202.635	1.408	157.955	1.408	214.998	1.408	193.313	1.408	308.705	1.408	822.559	1.408	182.608	1.408	151.414	1.408	334.785	1.408	127.572	1.408	243.451	1.408	160.717	NA	NA	NA	NA	1.408	219.581	1.408	147.119	NA	NA	NA	NA
					24	1.472	282.335	1.472	485.56	1.472	379.32	1.472	163.992	1.472	186.801	1.472	118.456	1.472	208.947	1.472	195.211	1.472	302.416	1.472	665.431	1.472	192.247	1.472	164.024	1.472	334.606	1.472	124.461	1.472	256.136	1.472	161.683	NA	NA	NA	NA	1.472	228.225	1.472	148.811	NA	NA	NA	NA
					25	1.536	310.928	1.536	404.088	1.536	403.6	1.536	164.353	1.536	194.115	1.536	115.417	1.536	201.991	1.536	190.959	1.536	281.155	1.536	752.679	1.536	200.038	1.536	169.092	1.536	329.385	1.536	120.696	1.536	255.746	1.536	168.686	NA	NA	NA	NA	1.536	218.672	1.536	140.913	NA	NA	NA	NA
					26	1.6	367.401	1.6	341.293	1.6	379.12	1.6	151.681	1.6	183.355	1.6	115.307	1.6	198.111	1.6	181.675	1.6	270.647	1.6	743.6	1.6	200.263	1.6	165.469	1.6	307.413	1.6	114.561	1.6	249.998	1.6	161.3	NA	NA	NA	NA	1.6	217.635	1.6	154.609	NA	NA	NA	NA
					27	1.664	402.873	1.664	244.464	1.664	310.322	1.664	145.076	NA	NA	NA	NA	1.664	197.385	1.664	174.615	1.664	261.37	1.664	698.413	1.664	211.256	1.664	155.072	1.664	286.068	1.664	117.848	1.664	275.034	1.664	154.419	NA	NA	NA	NA	1.664	248.751	1.664	166.771	NA	NA	NA	NA
					28	1.728	381.748	1.728	185.941	1.728	253.428	1.728	143.631	NA	NA	NA	NA	1.728	194.006	1.728	177.722	1.728	225.254	1.728	604.576	1.728	228.181	1.728	148.799	1.728	289.988	1.728	120.816	1.728	295.858	1.728	163.925	NA	NA	NA	NA	1.728	289.825	1.728	175.597	NA	NA	NA	NA
					29	1.792	339.815	1.792	168	1.792	236.83	1.792	157.774	NA	NA	NA	NA	1.792	186.428	1.792	176.64	1.792	192.19	1.792	510.312	1.792	231.806	1.792	144.747	1.792	310.228	1.792	110.651	1.792	274.995	1.792	162.074	NA	NA	NA	NA	1.792	301.519	1.792	168.979	NA	NA	NA	NA
					30	1.856	313.403	1.856	134.442	1.856	240.597	1.856	184.529	NA	NA	NA	NA	1.856	186.146	1.856	169.141	1.856	178.239	1.856	432.33	1.856	241.742	1.856	153.294	1.856	313.885	1.856	101.296	1.856	249.386	1.856	162.869	NA	NA	NA	NA	1.856	277.013	1.856	145.463	NA	NA	NA	NA
					31	1.92	281.796	1.92	108.671	1.92	249.329	1.92	195.427	NA	NA	NA	NA	1.92	179.14	1.92	165.331	1.92	178.766	1.92	372.843	1.92	237.125	1.92	167.464	1.92	296.461	1.92	104.297	1.92	247.814	1.92	164.155	NA	NA	NA	NA	1.92	240.718	1.92	136.121	NA	NA	NA	NA
					32	1.984	236.975	1.984	105.349	1.984	257.137	1.984	176.878	NA	NA	NA	NA	1.984	183.726	1.984	168.122	1.984	183.509	1.984	281.268	1.984	230.668	1.984	163.423	1.984	288.822	1.984	108.457	1.984	242.448	1.984	161.025	NA	NA	NA	NA	1.984	220.769	1.984	140.833	NA	NA	NA	NA
					33	2.048	182.603	2.048	104.346	2.048	232.124	2.048	160.584	NA	NA	NA	NA	2.048	202.684	2.048	172.987	2.048	207.402	2.048	191.117	2.048	244.69	2.048	157.762	2.048	257.851	2.048	113.264	2.048	235.064	2.048	163.876	NA	NA	NA	NA	2.048	208.224	2.048	146.518	NA	NA	NA	NA
					34	2.112	165.116	2.112	110.108	2.112	222.938	2.112	156.399	NA	NA	NA	NA	2.112	209.43	2.112	176.487	NA	NA	NA	NA	2.112	261.163	2.112	153.366	2.112	228.473	2.112	110.138	2.112	241.096	2.112	170.842	NA	NA	NA	NA	2.112	202.158	2.112	148.752	NA	NA	NA	NA
					35	2.176	168.183	NA	NA	2.176	264.54	2.176	175.878	NA	NA	NA	NA	2.176	214.365	2.176	183.266	NA	NA	NA	NA	2.176	277.259	2.176	153.005	2.176	199.697	2.176	100.812	2.176	249.188	2.176	164.566	NA	NA	NA	NA	2.176	206.703	2.176	150.319	NA	NA	NA	NA
					36	2.24	183.393	NA	NA	2.24	277.388	2.24	194.916	NA	NA	NA	NA	2.24	237.31	2.24	189.883	NA	NA	NA	NA	2.24	288.282	2.24	156.559	2.24	197.655	2.24	91.094	2.24	240.081	2.24	153.581	NA	NA	NA	NA	2.24	210.96	2.24	150.594	NA	NA	NA	NA
					37	2.304	190.791	NA	NA	2.304	241.658	2.304	189.022	NA	NA	NA	NA	2.304	265.16	2.304	190.758	NA	NA	NA	NA	2.304	298.545	2.304	157.314	2.304	229.485	2.304	94.465	2.304	225.64	2.304	157.609	NA	NA	NA	NA	2.304	207.237	2.304	144.388	NA	NA	NA	NA
					38	2.368	211.531	NA	NA	2.368	229.314	2.368	189.412	NA	NA	NA	NA	2.368	273.76	2.368	184.663	NA	NA	NA	NA	2.368	304.649	2.368	160.739	2.368	267.705	2.368	101.891	2.368	220.009	2.368	159.747	NA	NA	NA	NA	2.368	211.562	2.368	138.242	NA	NA	NA	NA
					39	2.432	234.48	NA	NA	2.432	232.081	2.432	178.829	NA	NA	NA	NA	2.432	285.64	2.432	174.81	NA	NA	NA	NA	2.432	303.511	2.432	170.653	2.432	295	2.432	105	2.432	224.448	2.432	158.266	NA	NA	NA	NA	2.432	217.267	2.432	158.164	NA	NA	NA	NA
					40	2.496	245.015	NA	NA	2.496	259.852	2.496	161.048	NA	NA	NA	NA	2.496	285.403	2.496	169.645	NA	NA	NA	NA	2.496	292.19	2.496	169.755	2.496	317.48	2.496	119.896	2.496	211.697	2.496	168.102	NA	NA	NA	NA	2.496	219.003	2.496	174.138	NA	NA	NA	NA
					41	2.56	252.656	NA	NA	2.56	258.314	2.56	154.957	NA	NA	NA	NA	2.56	272.621	2.56	169.831	NA	NA	NA	NA	2.56	287.344	2.56	153.402	2.56	300.963	2.56	125.755	2.56	205.983	2.56	163.777	NA	NA	NA	NA	2.56	226.76	2.56	175.427	NA	NA	NA	NA
					42	2.624	333.533	NA	NA	2.624	218.3	2.624	155.676	NA	NA	NA	NA	2.624	260.784	NA	NA	NA	NA	NA	NA	2.624	294.176	2.624	150.515	2.624	279.152	2.624	129.346	2.624	195.166	2.624	156.523	NA	NA	NA	NA	2.624	249.856	2.624	171.077	NA	NA	NA	NA
					43	2.688	430.878	NA	NA	2.688	212.86	2.688	174.364	NA	NA	NA	NA	2.688	259.424	NA	NA	NA	NA	NA	NA	2.688	303	2.688	159.717	2.688	276.117	2.688	137.639	2.688	193.554	2.688	168.121	NA	NA	NA	NA	2.688	264.561	2.688	157.681	NA	NA	NA	NA
					44	2.752	437.765	NA	NA	2.752	223.32	2.752	176.819	NA	NA	NA	NA	2.752	258.452	NA	NA	NA	NA	NA	NA	2.752	315.44	2.752	164.368	2.752	307.029	2.752	136.362	2.752	208.336	2.752	179.115	NA	NA	NA	NA	2.752	280.474	2.752	156.599	NA	NA	NA	NA
					45	2.816	402.196	NA	NA	2.816	230.16	2.816	154.459	NA	NA	NA	NA	2.816	247.857	NA	NA	NA	NA	NA	NA	2.816	311.44	2.816	168.493	2.816	342.366	2.816	137.568	2.816	237.534	2.816	166.268	NA	NA	NA	NA	2.816	302.495	2.816	152.736	NA	NA	NA	NA
					46	NA	NA	NA	NA	2.88	230.14	2.88	156.409	NA	NA	NA	NA	2.88	234.144	NA	NA	NA	NA	NA	NA	2.88	317.97	2.88	166.22	2.88	364.739	2.88	131.828	2.88	257.372	2.88	154.413	NA	NA	NA	NA	2.88	327.893	2.88	158.452	NA	NA	NA	NA
					47	NA	NA	NA	NA	2.944	216.24	2.944	163.699	NA	NA	NA	NA	2.944	233.022	NA	NA	NA	NA	NA	NA	2.944	333.56	2.944	162.637	2.944	362.792	2.944	128.049	2.944	254.491	2.944	160.876	NA	NA	NA	NA	2.944	335.775	2.944	158.717	NA	NA	NA	NA
					48	NA	NA	NA	NA	3.008	226.04	3.008	162.138	NA	NA	NA	NA	3.008	220.564	NA	NA	NA	NA	NA	NA	3.008	316.11	3.008	165.913	NA	NA	NA	NA	3.008	225.936	3.008	177.073	NA	NA	NA	NA	3.008	299.558	3.008	161.991	NA	NA	NA	NA
					49	NA	NA	NA	NA	3.072	238.32	3.072	165.439	NA	NA	NA	NA	3.072	200.675	NA	NA	NA	NA	NA	NA	3.072	267.45	3.072	166.835	NA	NA	NA	NA	3.072	192.997	3.072	190.448	NA	NA	NA	NA	3.072	259.532	3.072	153.433	NA	NA	NA	NA
					50	NA	NA	NA	NA	3.136	237.42	3.136	167.002	NA	NA	NA	NA	3.136	192.903	NA	NA	NA	NA	NA	NA	3.136	234.54	3.136	166.95	NA	NA	NA	NA	3.136	176.619	3.136	196.048	NA	NA	NA	NA	3.136	233.389	3.136	157.698	NA	NA	NA	NA
					51	NA	NA	NA	NA	3.2	281.72	3.2	168.909	NA	NA	NA	NA	3.2	201.212	NA	NA	NA	NA	NA	NA	3.2	226.78	3.2	177.788	NA	NA	NA	NA	3.2	177.827	3.2	194.778	NA	NA	NA	NA	3.2	219.358	3.2	180.908	NA	NA	NA	NA
					52	NA	NA	NA	NA	3.264	332.86	3.264	173.974	NA	NA	NA	NA	3.264	203.65	NA	NA	NA	NA	NA	NA	3.264	231.9	3.264	172.068	NA	NA	NA	NA	3.264	195.598	3.264	185.214	NA	NA	NA	NA	3.264	213.43	3.264	179.377	NA	NA	NA	NA
					53	NA	NA	NA	NA	3.328	334.84	3.328	178.141	NA	NA	NA	NA	3.328	198.012	NA	NA	NA	NA	NA	NA	3.328	252.43	3.328	164.497	NA	NA	NA	NA	3.328	224.566	3.328	171.747	NA	NA	NA	NA	3.328	205.943	3.328	165.252	NA	NA	NA	NA
					54	NA	NA	NA	NA	3.392	398.5	3.392	179.199	NA	NA	NA	NA	3.392	207.86	NA	NA	NA	NA	NA	NA	3.392	275.78	3.392	164.125	NA	NA	NA	NA	3.392	253.474	3.392	166.044	NA	NA	NA	NA	3.392	215.535	3.392	155.648	NA	NA	NA	NA
					55	NA	NA	NA	NA	3.456	426.2	3.456	175.199	NA	NA	NA	NA	3.456	214.04	NA	NA	NA	NA	NA	NA	3.456	275.357	3.456	163.137	NA	NA	NA	NA	3.456	262.758	3.456	174.058	NA	NA	NA	NA	3.456	209.595	3.456	150.698	NA	NA	NA	NA
					56	NA	NA	NA	NA	3.52	404.92	3.52	175.515	NA	NA	NA	NA	3.52	201.76	NA	NA	NA	NA	NA	NA	3.52	270.668	3.52	149.538	NA	NA	NA	NA	3.52	252.997	3.52	176.668	NA	NA	NA	NA	3.52	203.585	3.52	154.814	NA	NA	NA	NA
					57	NA	NA	NA	NA	3.584	386.656	3.584	185.393	NA	NA	NA	NA	3.584	213.5	NA	NA	NA	NA	NA	NA	3.584	241.279	3.584	147.542	NA	NA	NA	NA	3.584	221.04	3.584	172.656	NA	NA	NA	NA	3.584	207.279	3.584	157.244	NA	NA	NA	NA
					58	NA	NA	NA	NA	3.648	414.409	3.648	184.153	NA	NA	NA	NA	3.648	229.26	NA	NA	NA	NA	NA	NA	3.648	207.287	3.648	152.818	NA	NA	NA	NA	3.648	212.48	3.648	170.898	NA	NA	NA	NA	3.648	226.925	3.648	165.21	NA	NA	NA	NA
					59	NA	NA	NA	NA	3.712	389.013	3.712	173.761	NA	NA	NA	NA	3.712	210.162	NA	NA	NA	NA	NA	NA	3.712	202.345	3.712	149.263	NA	NA	NA	NA	NA	NA	3.712	175.766	NA	NA	NA	NA	3.712	269.357	3.712	165.915	NA	NA	NA	NA
					60	NA	NA	NA	NA	3.776	334.586	3.776	169.247	NA	NA	NA	NA	3.776	191.868	NA	NA	NA	NA	NA	NA	3.776	226.2	3.776	158.801	NA	NA	NA	NA	NA	NA	3.776	180.155	NA	NA	NA	NA	3.776	290.191	3.776	161.011	NA	NA	NA	NA
					61	NA	NA	NA	NA	3.84	290.809	3.84	168.875	NA	NA	NA	NA	3.84	189.054	NA	NA	NA	NA	NA	NA	3.84	230.121	3.84	166.361	NA	NA	NA	NA	NA	NA	3.84	172.688	NA	NA	NA	NA	3.84	263.965	3.84	160.47	NA	NA	NA	NA
					62	NA	NA	NA	NA	3.904	263.84	3.904	164.873	NA	NA	NA	NA	3.904	183.416	NA	NA	NA	NA	NA	NA	3.904	237.207	3.904	159.151	NA	NA	NA	NA	NA	NA	3.904	167.527	NA	NA	NA	NA	3.904	232.976	3.904	152.115	NA	NA	NA	NA
					63	NA	NA	NA	NA	3.968	269.458	3.968	160.981	NA	NA	NA	NA	NA	NA	NA	NA	NA	NA	NA	NA	3.968	251.607	NA	NA	NA	NA	NA	NA	NA	NA	3.968	165.135	NA	NA	NA	NA	3.968	244.425	3.968	149.221	NA	NA	NA	NA
					64	NA	NA	NA	NA	4.032	329.278	4.032	158.355	NA	NA	NA	NA	NA	NA	NA	NA	NA	NA	NA	NA	4.032	259.604	NA	NA	NA	NA	NA	NA	NA	NA	4.032	166.317	NA	NA	NA	NA	4.032	198.75	4.032	152.503	NA	NA	NA	NA
					65	NA	NA	NA	NA	4.096	439.703	4.096	151.145	NA	NA	NA	NA	NA	NA	NA	NA	NA	NA	NA	NA	4.096	268.995	NA	NA	NA	NA	NA	NA	NA	NA	NA	NA	NA	NA	NA	NA	4.096	160.944	4.096	158.99	NA	NA	NA	NA
					66	NA	NA	NA	NA	4.16	495.062	4.16	157.571	NA	NA	NA	NA	NA	NA	NA	NA	NA	NA	NA	NA	4.16	264.346	NA	NA	NA	NA	NA	NA	NA	NA	NA	NA	NA	NA	NA	NA	4.16	140.212	NA	NA	NA	NA	NA	NA
					67	NA	NA	NA	NA	4.224	554.979	4.224	159.833	NA	NA	NA	NA	NA	NA	NA	NA	NA	NA	NA	NA	4.224	229.776	NA	NA	NA	NA	NA	NA	NA	NA	NA	NA	NA	NA	NA	NA	4.224	144.606	NA	NA	NA	NA	NA	NA
					68	NA	NA	NA	NA	4.288	636.566	4.288	158.023	NA	NA	NA	NA	NA	NA	NA	NA	NA	NA	NA	NA	4.288	195.128	NA	NA	NA	NA	NA	NA	NA	NA	NA	NA	NA	NA	NA	NA	4.288	156.529	NA	NA	NA	NA	NA	NA
					69	NA	NA	NA	NA	4.352	644.125	4.352	160.666	NA	NA	NA	NA	NA	NA	NA	NA	NA	NA	NA	NA	4.352	175.837	NA	NA	NA	NA	NA	NA	NA	NA	NA	NA	NA	NA	NA	NA	4.352	178.289	NA	NA	NA	NA	NA	NA
					70	NA	NA	NA	NA	4.416	604.781	4.416	166.231	NA	NA	NA	NA	NA	NA	NA	NA	NA	NA	NA	NA	4.416	166.782	NA	NA	NA	NA	NA	NA	NA	NA	NA	NA	NA	NA	NA	NA	4.416	194.72	NA	NA	NA	NA	NA	NA
					71	NA	NA	NA	NA	4.48	611.49	4.48	177.616	NA	NA	NA	NA	NA	NA	NA	NA	NA	NA	NA	NA	4.48	156.888	NA	NA	NA	NA	NA	NA	NA	NA	NA	NA	NA	NA	NA	NA	4.48	196.817	NA	NA	NA	NA	NA	NA
					72	NA	NA	NA	NA	4.544	596.655	4.544	169.91	NA	NA	NA	NA	NA	NA	NA	NA	NA	NA	NA	NA	4.544	160.432	NA	NA	NA	NA	NA	NA	NA	NA	NA	NA	NA	NA	NA	NA	4.544	226.508	NA	NA	NA	NA	NA	NA
					73	NA	NA	NA	NA	4.608	595.793	4.608	157.013	NA	NA	NA	NA	NA	NA	NA	NA	NA	NA	NA	NA	4.608	189.781	NA	NA	NA	NA	NA	NA	NA	NA	NA	NA	NA	NA	NA	NA	4.608	264.263	NA	NA	NA	NA	NA	NA
					74	NA	NA	NA	NA	4.672	574.601	4.672	156.926	NA	NA	NA	NA	NA	NA	NA	NA	NA	NA	NA	NA	4.672	233.955	NA	NA	NA	NA	NA	NA	NA	NA	NA	NA	NA	NA	NA	NA	4.672	266.976	NA	NA	NA	NA	NA	NA
					75	NA	NA	NA	NA	4.736	527.674	4.736	172.154	NA	NA	NA	NA	NA	NA	NA	NA	NA	NA	NA	NA	4.736	272.474	NA	NA	NA	NA	NA	NA	NA	NA	NA	NA	NA	NA	NA	NA	4.736	228.32	NA	NA	NA	NA	NA	NA
					76	NA	NA	NA	NA	4.8	459.828	4.8	171.658	NA	NA	NA	NA	NA	NA	NA	NA	NA	NA	NA	NA	4.8	263.822	NA	NA	NA	NA	NA	NA	NA	NA	NA	NA	NA	NA	NA	NA	4.8	192.032	NA	NA	NA	NA	NA	NA
					77	NA	NA	NA	NA	4.864	370.044	4.864	176.144	NA	NA	NA	NA	NA	NA	NA	NA	NA	NA	NA	NA	4.864	261	NA	NA	NA	NA	NA	NA	NA	NA	NA	NA	NA	NA	NA	NA	4.864	171.766	NA	NA	NA	NA	NA	NA
					78	NA	NA	NA	NA	4.928	292.961	4.928	176.477	NA	NA	NA	NA	NA	NA	NA	NA	NA	NA	NA	NA	4.928	258.78	NA	NA	NA	NA	NA	NA	NA	NA	NA	NA	NA	NA	NA	NA	4.928	160.713	NA	NA	NA	NA	NA	NA
					79	NA	NA	NA	NA	4.992	273.702	4.992	180.05	NA	NA	NA	NA	NA	NA	NA	NA	NA	NA	NA	NA	4.992	243.94	NA	NA	NA	NA	NA	NA	NA	NA	NA	NA	NA	NA	NA	NA	4.992	160.85	NA	NA	NA	NA	NA	NA
					80	NA	NA	NA	NA	5.056	293.47	5.056	171.455	NA	NA	NA	NA	NA	NA	NA	NA	NA	NA	NA	NA	5.056	245.66	NA	NA	NA	NA	NA	NA	NA	NA	NA	NA	NA	NA	NA	NA	5.056	166.99	NA	NA	NA	NA	NA	NA
					81	NA	NA	NA	NA	5.12	305.21	5.12	174.593	NA	NA	NA	NA	NA	NA	NA	NA	NA	NA	NA	NA	NA	NA	NA	NA	NA	NA	NA	NA	NA	NA	NA	NA	NA	NA	NA	NA	5.12	181.4	NA	NA	NA	NA	NA	NA
					82	NA	NA	NA	NA	5.184	381.693	5.184	179.644	NA	NA	NA	NA	NA	NA	NA	NA	NA	NA	NA	NA	NA	NA	NA	NA	NA	NA	NA	NA	NA	NA	NA	NA	NA	NA	NA	NA	5.184	208.81	NA	NA	NA	NA	NA	NA
					83	NA	NA	NA	NA	5.248	501.356	5.248	187.036	NA	NA	NA	NA	NA	NA	NA	NA	NA	NA	NA	NA	NA	NA	NA	NA	NA	NA	NA	NA	NA	NA	NA	NA	NA	NA	NA	NA	NA	NA	NA	NA	NA	NA	NA	NA
					84	NA	NA	NA	NA	5.312	555.89	5.312	189.389	NA	NA	NA	NA	NA	NA	NA	NA	NA	NA	NA	NA	NA	NA	NA	NA	NA	NA	NA	NA	NA	NA	NA	NA	NA	NA	NA	NA	NA	NA	NA	NA	NA	NA	NA	NA
					85	NA	NA	NA	NA	5.376	517.959	5.376	194.859	NA	NA	NA	NA	NA	NA	NA	NA	NA	NA	NA	NA	NA	NA	NA	NA	NA	NA	NA	NA	NA	NA	NA	NA	NA	NA	NA	NA	NA	NA	NA	NA	NA	NA	NA	NA
					86	NA	NA	NA	NA	5.44	467.033	NA	NA	NA	NA	NA	NA	NA	NA	NA	NA	NA	NA	NA	NA	NA	NA	NA	NA	NA	NA	NA	NA	NA	NA	NA	NA	NA	NA	NA	NA	NA	NA	NA	NA	NA	NA	NA	NA
					87	NA	NA	NA	NA	5.504	428.044	NA	NA	NA	NA	NA	NA	NA	NA	NA	NA	NA	NA	NA	NA	NA	NA	NA	NA	NA	NA	NA	NA	NA	NA	NA	NA	NA	NA	NA	NA	NA	NA	NA	NA	NA	NA	NA	NA
					88	NA	NA	NA	NA	5.568	391.275	NA	NA	NA	NA	NA	NA	NA	NA	NA	NA	NA	NA	NA	NA	NA	NA	NA	NA	NA	NA	NA	NA	NA	NA	NA	NA	NA	NA	NA	NA	NA	NA	NA	NA	NA	NA	NA	NA
					89	NA	NA	NA	NA	5.632	403.498	NA	NA	NA	NA	NA	NA	NA	NA	NA	NA	NA	NA	NA	NA	NA	NA	NA	NA	NA	NA	NA	NA	NA	NA	NA	NA	NA	NA	NA	NA	NA	NA	NA	NA	NA	NA	NA	NA
					90	NA	NA	NA	NA	5.696	476.413	NA	NA	NA	NA	NA	NA	NA	NA	NA	NA	NA	NA	NA	NA	NA	NA	NA	NA	NA	NA	NA	NA	NA	NA	NA	NA	NA	NA	NA	NA	NA	NA	NA	NA	NA	NA	NA	NA
					91	NA	NA	NA	NA	5.76	502.44	NA	NA	NA	NA	NA	NA	NA	NA	NA	NA	NA	NA	NA	NA	NA	NA	NA	NA	NA	NA	NA	NA	NA	NA	NA	NA	NA	NA	NA	NA	NA	NA	NA	NA	NA	NA	NA	NA
					92	NA	NA	NA	NA	NA	NA	NA	NA	NA	NA	NA	NA	NA	NA	NA	NA	NA	NA	NA	NA	NA	NA	NA	NA	NA	NA	NA	NA	NA	NA	NA	NA	NA	NA	NA	NA	NA	NA	NA	NA	NA	NA	NA	NA
					93	NA	NA	NA	NA	NA	NA	NA	NA	NA	NA	NA	NA	NA	NA	NA	NA	NA	NA	NA	NA	NA	NA	NA	NA	NA	NA	NA	NA	NA	NA	NA	NA	NA	NA	NA	NA	NA	NA	NA	NA	NA	NA	NA	NA
					94	NA	NA	NA	NA	NA	NA	NA	NA	NA	NA	NA	NA	NA	NA	NA	NA	NA	NA	NA	NA	NA	NA	NA	NA	NA	NA	NA	NA	NA	NA	NA	NA	NA	NA	NA	NA	NA	NA	NA	NA	NA	NA	NA	NA
					95	NA	NA	NA	NA	NA	NA	NA	NA	NA	NA	NA	NA	NA	NA	NA	NA	NA	NA	NA	NA	NA	NA	NA	NA	NA	NA	NA	NA	NA	NA	NA	NA	NA	NA	NA	NA	NA	NA	NA	NA	NA	NA	NA	NA
					96	NA	NA	NA	NA	NA	NA	NA	NA	NA	NA	NA	NA	NA	NA	NA	NA	NA	NA	NA	NA	NA	NA	NA	NA	NA	NA	NA	NA	NA	NA	NA	NA	NA	NA	NA	NA	NA	NA	NA	NA	NA	NA	NA	NA
					97	NA	NA	NA	NA	NA	NA	NA	NA	NA	NA	NA	NA	NA	NA	NA	NA	NA	NA	NA	NA	NA	NA	NA	NA	NA	NA	NA	NA	NA	NA	NA	NA	NA	NA	NA	NA	NA	NA	NA	NA	NA	NA	NA	NA
					98	NA	NA	NA	NA	NA	NA	NA	NA	NA	NA	NA	NA	NA	NA	NA	NA	NA	NA	NA	NA	NA	NA	NA	NA	NA	NA	NA	NA	NA	NA	NA	NA	NA	NA	NA	NA	NA	NA	NA	NA	NA	NA	NA	NA
					99	NA	NA	NA	NA	NA	NA	NA	NA	NA	NA	NA	NA	NA	NA	NA	NA	NA	NA	NA	NA	NA	NA	NA	NA	NA	NA	NA	NA	NA	NA	NA	NA	NA	NA	NA	NA	NA	NA	NA	NA	NA	NA	NA	NA
[truncated: 36 more columns]

## Sheet: Nup42_KR
Nup42-GFP						1								2								3								4								5								6
Nup60K467R						Ic				Ir		Ibg		Ic				Ir		Ibg		Ic				Ir		Ibg		Ic				Ir		Ibg		Ic				Ir		Ibg		Ic
							240.984				191.724		144.613		215.307				183.653		145.69		198.853				178.186		143.659		221.19				165.745		132.264		247.719				218.615		144.965		190.062
							96.3718								69.6167								55.1939								88.9264								102.754								58.743
	average	median	SEM	n		Relative accumulation (RA)					47.1115			Relative accumulation (RA)					37.9633			Relative accumulation (RA)					34.5271			Relative accumulation (RA)					33.4808			Relative accumulation (RA)					73.6501			Relative accumulation (RA)
RA:	2.95993	2.0895	0.573997	20		2.04561								1.83379								1.59857								2.65604								1.39516								2.6563
	p-value
	1.60066e-06
						190117_15786_Nup42-GFP01_01_Crop_1GFP_x_lc	190117_15786_Nup42-GFP01_01_Crop_1GFP_y_lc	190117_15786_Nup42-GFP01_01_Crop_1mCh_x_cap	190117_15786_Nup42-GFP01_01_Crop_1mCh_y_cap	190117_15786_Nup42-GFP01_01_Crop_1GFP_x_lr	190117_15786_Nup42-GFP01_01_Crop_1GFP_y_lr	190117_15786_Nup42-GFP01_01_Crop_1GFP_x_bg	190117_15786_Nup42-GFP01_01_Crop_1GFP_y_bg	190117_15786_Nup42-GFP01_05_Crop_1GFP_x_lc	190117_15786_Nup42-GFP01_05_Crop_1GFP_y_lc	190117_15786_Nup42-GFP01_05_Crop_1mCh_x_cap	190117_15786_Nup42-GFP01_05_Crop_1mCh_y_cap	190117_15786_Nup42-GFP01_05_Crop_1GFP_x_lr	190117_15786_Nup42-GFP01_05_Crop_1GFP_y_lr	190117_15786_Nup42-GFP01_05_Crop_1GFP_x_bg	190117_15786_Nup42-GFP01_05_Crop_1GFP_y_bg	190117_15786_Nup42-GFP01_06_Crop_1GFP_x_lc	190117_15786_Nup42-GFP01_06_Crop_1GFP_y_lc	190117_15786_Nup42-GFP01_06_Crop_1mCh_x_cap	190117_15786_Nup42-GFP01_06_Crop_1mCh_y_cap	190117_15786_Nup42-GFP01_06_Crop_1GFP_x_lr	190117_15786_Nup42-GFP01_06_Crop_1GFP_y_lr	190117_15786_Nup42-GFP01_06_Crop_1GFP_x_bg	190117_15786_Nup42-GFP01_06_Crop_1GFP_y_bg	190117_15786_Nup42-GFP01_07_Crop_1GFP_x_lc	190117_15786_Nup42-GFP01_07_Crop_1GFP_y_lc	190117_15786_Nup42-GFP01_07_Crop_1mCh_x_cap	190117_15786_Nup42-GFP01_07_Crop_1mCh_y_cap	190117_15786_Nup42-GFP01_07_Crop_1GFP_x_lr	190117_15786_Nup42-GFP01_07_Crop_1GFP_y_lr	190117_15786_Nup42-GFP01_07_Crop_1GFP_x_bg	190117_15786_Nup42-GFP01_07_Crop_1GFP_y_bg	190117_15786_Nup42-GFP01_07_Crop_2GFP_x_lc	190117_15786_Nup42-GFP01_07_Crop_2GFP_y_lc	190117_15786_Nup42-GFP01_07_Crop_2mCh_x_cap	190117_15786_Nup42-GFP01_07_Crop_2mCh_y_cap	190117_15786_Nup42-GFP01_07_Crop_2GFP_x_lr	190117_15786_Nup42-GFP01_07_Crop_2GFP_y_lr	190117_15786_Nup42-GFP01_07_Crop_2GFP_x_bg	190117_15786_Nup42-GFP01_07_Crop_2GFP_y_bg	190117_15786_Nup42-GFP01_07_Crop_3GFP_x_lc	190117_15786_Nup42-GFP01_07_Crop_3GFP_y_lc	190117_15786_Nup42-GFP01_07_Crop_3mCh_x_cap	190117_15786_Nup42-GFP01_07_Crop_3mCh_y_cap
					1	0	250	0	135	0	153	0	151	0	176	0	12	0	190	0	150	0	193	0	86	0	158	0	144	0	222	0	230	0	152	0	121	0	187	0	34	0	215	0	162	0	178	0	173
					2	0.064	260	0.064	151	0.064	150.549	0.064	145.592	0.064	231.935	0.064	13.577	0.064	186.903	0.064	155.552	0.064	212.809	0.064	79.424	0.064	168.717	0.064	148.416	0.064	216.601	0.064	252.805	0.064	146.445	0.064	121.982	0.064	197.471	0.064	51.406	0.064	215.55	0.064	177.938	0.064	209.401	0.064	169.222
					3	0.128	249	0.128	174	0.128	161.394	0.128	151.313	0.128	234.301	0.128	18.643	0.128	175.343	0.128	130.59	0.128	220.189	0.128	77.336	0.128	179.551	0.128	154.212	0.128	217.775	0.128	283.257	0.128	146.706	0.128	127.563	0.128	198.527	0.128	57.309	0.128	207.787	0.128	178.705	0.128	213.258	0.128	178.752
					4	0.192	230	0.192	223	0.192	169.093	0.192	151.944	0.192	220.298	0.192	29.867	0.192	158.159	0.192	119.023	0.192	230.913	0.192	72.393	0.192	200.988	0.192	157.296	0.192	230.769	0.192	302.26	0.192	152.717	0.192	137.359	0.192	195.511	0.192	52.952	0.192	188.059	0.192	161.839	0.192	197.253	0.192	188.851
					5	0.256	216	0.256	297	0.256	175.609	0.256	150.537	0.256	228.229	0.256	40.902	0.256	153.142	0.256	131.338	0.256	258.616	0.256	73.724	0.256	191.874	0.256	147.535	0.256	241.691	0.256	315.347	0.256	161.809	0.256	142.774	0.256	211.348	0.256	50.269	0.256	183.745	0.256	146.558	0.256	189.203	0.256	186.256
					6	0.32	191	0.32	343	0.32	165.176	0.32	146.809	0.32	242.025	0.32	51.095	0.32	158.95	0.32	147.647	0.32	289.739	0.32	74.656	0.32	177.843	0.32	139.089	0.32	226.949	0.32	317.292	0.32	156.462	0.32	137.782	0.32	223.371	0.32	45.122	0.32	174.701	0.32	130.211	0.32	170.74	0.32	167.954
					7	0.384	199	0.384	416	0.384	166.197	0.384	136.074	0.384	263.064	0.384	84.121	0.384	155.889	0.384	145.785	0.384	301.823	0.384	71.108	0.384	180.204	0.384	145.169	0.384	205.104	0.384	322.674	0.384	156.144	0.384	130.913	0.384	215.596	0.384	37.36	0.384	168.779	0.384	118.466	0.384	149.475	0.384	152.945
					8	0.448	201	0.448	407	0.448	181.634	0.448	121.75	0.448	255.089	0.448	125.495	0.448	153.282	0.448	138.444	0.448	280.741	0.448	110.581	0.448	192.616	0.448	149.328	0.448	187.455	0.448	330.286	0.448	166.801	0.448	133.012	0.448	201.862	0.448	31.919	0.448	186.075	0.448	125.469	0.448	138.035	0.448	132.143
					9	0.512	184	0.512	360	0.512	195.404	0.512	128.225	0.512	232.19	0.512	192.555	0.512	160.104	0.512	145.662	0.512	257.19	0.512	189.582	0.512	182.701	0.512	149.347	0.512	195.088	0.512	303.699	0.512	162.732	0.512	131.15	0.512	204.284	0.512	36.558	0.512	218.39	0.512	118.673	0.512	142.189	0.512	113.68
					10	0.576	185.676	0.576	304.525	0.576	215.046	0.576	144.069	0.576	219.649	0.576	268.189	0.576	162.956	0.576	151.294	0.576	220.545	0.576	323.338	0.576	172.637	0.576	151.693	0.576	196.56	0.576	237.906	0.576	156.794	0.576	127.325	0.576	210.334	0.576	40.524	0.576	215.282	0.576	116.619	0.576	154.972	0.576	100.952
					11	0.64	184.694	0.64	242.68	0.64	229.92	0.64	150.779	0.64	220.603	0.64	297.22	0.64	160.293	0.64	135.445	0.64	211.477	0.64	477.657	0.64	168.303	0.64	157.469	0.64	198.38	0.64	164.26	0.64	171.415	0.64	123.577	0.64	215.65	0.64	40.082	0.64	210.44	0.64	127.16	0.64	161.985	0.64	111.445
					12	0.704	189.803	0.704	186.107	0.704	231.315	0.704	143.523	0.704	190.769	0.704	374.16	0.704	175.786	0.704	125.818	0.704	199.425	0.704	592.335	0.704	168.623	0.704	158.096	0.704	222.82	0.704	166	0.704	188.817	0.704	128.255	0.704	212.715	0.704	34.29	0.704	215.748	0.704	138.171	0.704	171.896	0.704	135.499
					13	0.768	235.218	0.768	168.691	0.768	228.191	0.768	149.387	0.768	168.145	0.768	375.74	0.768	197.912	0.768	135.254	0.768	185.8	0.768	756.536	0.768	162.62	0.768	152.69	0.768	237.86	0.768	166.13	0.768	191.281	0.768	133.677	0.768	206.524	0.768	30.396	0.768	238.56	0.768	138.559	0.768	184.653	0.768	154.672
					14	0.832	284.24	0.832	219.8	0.832	210.126	0.832	148.26	0.832	159.393	0.832	346.799	0.832	199.202	0.832	142.818	0.832	176.785	0.832	795.187	0.832	158.828	0.832	146.76	0.832	258.43	0.832	164.14	0.832	189.58	0.832	138.302	0.832	223.271	0.832	35.23	0.832	224.085	0.832	136.077	0.832	206.436	0.832	159.867
					15	0.896	295.6	0.896	282.48	0.896	181.688	0.896	137.54	0.896	160.029	0.896	313.764	0.896	198.064	0.896	139.994	0.896	172.032	0.896	738.385	0.896	167.034	0.896	142.75	0.896	268.78	0.896	140.97	0.896	180.09	0.896	132.999	0.896	274.621	0.896	46.534	0.896	190.474	0.896	141.744	0.896	238.897	0.896	154.125
					16	0.96	308.48	0.96	309	0.96	173.12	0.96	152.971	0.96	169.949	0.96	246.243	0.96	213.351	0.96	152.974	0.96	167.835	0.96	606.536	0.96	160.989	0.96	137.392	0.96	272.57	0.96	110.36	0.96	169.044	0.96	128.88	0.96	311.715	0.96	56.213	0.96	191.938	0.96	143.639	0.96	265.012	0.96	159.707
					17	1.024	345.48	1.024	341.68	1.024	180.01	1.024	151.844	1.024	184.864	1.024	163.633	1.024	232.31	1.024	147.212	1.024	162.856	1.024	521.558	1.024	160.239	1.024	140.007	1.024	266.44	1.024	94.009	1.024	160.777	1.024	129.855	1.024	337.859	1.024	57.299	1.024	216.622	1.024	142.648	1.024	285.383	1.024	165.745
					18	1.088	318.2	1.088	370.84	1.088	193.142	1.088	136.944	1.088	193.228	1.088	107.285	1.088	226.318	1.088	140.231	1.088	161.835	1.088	498.607	1.088	170.82	1.088	146.271	1.088	273.18	1.088	115.67	1.088	165.034	1.088	138.344	1.088	360.421	1.088	51.241	1.088	223.849	1.088	137.6	1.088	289.487	1.088	167.837
					19	1.152	286.28	1.152	348	1.152	192.491	1.152	136.44	1.152	201.159	1.152	80.538	1.152	217.43	1.152	137.695	1.152	163.385	1.152	521.395	1.152	172.105	1.152	141.892	1.152	256.747	1.152	137.031	1.152	170.331	1.152	136.124	1.152	383.824	1.152	41.019	1.152	213.267	1.152	144.529	1.152	279.629	1.152	169.163
					20	1.216	260.04	1.216	323	1.216	184.652	1.216	146.65	1.216	199.126	1.216	70.56	1.216	228.696	1.216	135.148	1.216	159.462	1.216	605.619	1.216	165.5	1.216	145.559	1.216	240.463	1.216	149.461	1.216	185.305	1.216	138.59	1.216	379.792	1.216	62.387	1.216	205.781	1.216	159.077	1.216	253.923	1.216	189.098
					21	1.28	239.975	1.28	326.485	1.28	209.414	1.28	148.169	1.28	199.503	1.28	63.095	1.28	231.44	1.28	154.332	1.28	152.413	1.28	667.812	1.28	157.923	1.28	147.899	1.28	226.13	1.28	141.145	1.28	212.161	1.28	137.922	1.28	350.908	1.28	88.813	1.28	206.041	1.28	157.091	1.28	215.453	1.28	203.679
					22	1.344	229.325	1.344	289.098	1.344	231.678	1.344	146.508	1.344	215.595	1.344	54.547	1.344	219.115	1.344	163.43	1.344	153.5	1.344	629.314	1.344	159.461	1.344	146.792	1.344	222.267	1.344	121.491	1.344	229.793	1.344	133.107	1.344	297.262	1.344	128.665	1.344	205.677	1.344	153.542	1.344	185.333	1.344	177.962
					23	1.408	235.397	1.408	244.459	1.408	256.581	1.408	148.869	1.408	221.351	1.408	53.825	1.408	196.472	1.408	162.887	1.408	154.026	1.408	487.069	1.408	165.747	1.408	145.838	1.408	214.455	1.408	107.941	1.408	241.085	1.408	134.09	1.408	259.217	1.408	165.605	1.408	198.084	1.408	146.661	1.408	167.06	1.408	164.346
					24	1.472	228.43	1.472	179.705	1.472	265.848	1.472	145.039	1.472	199.639	1.472	62.827	1.472	178.992	1.472	147.718	1.472	156.028	1.472	416.131	1.472	184.253	1.472	138.773	1.472	199	1.472	91	1.472	244.606	1.472	131.737	1.472	229.033	1.472	205.84	1.472	201.577	1.472	141.699	1.472	147.299	1.472	154.992
					25	1.536	217.774	1.536	150.041	1.536	281.32	1.536	150.066	1.536	177.37	1.536	73.456	1.536	184.15	1.536	135.1	1.536	163.111	1.536	359.167	1.536	200.789	1.536	133.849	1.536	193	1.536	117	1.536	239.466	1.536	128.163	1.536	199.221	1.536	195.276	1.536	212.016	1.536	143.361	1.536	133.926	1.536	140.204
					26	NA	NA	NA	NA	1.6	247.69	1.6	138.911	1.6	163.595	1.6	87.229	1.6	175.051	1.6	136.897	1.6	164.631	1.6	283.233	1.6	207.959	1.6	134.595	1.6	191	1.6	128	1.6	218.394	1.6	130.191	1.6	192.241	1.6	154.824	1.6	224.423	1.6	142.291	1.6	127.688	1.6	117.373
					27	NA	NA	NA	NA	1.664	215.407	1.664	133.522	1.664	159.442	1.664	107.656	1.664	176.62	1.664	134.682	NA	NA	NA	NA	1.664	203.584	1.664	129.176	1.664	191	1.664	122	1.664	196.435	1.664	126.98	1.664	208.83	1.664	112.515	1.664	244.615	1.664	142.666	1.664	130.197	1.664	101.125
					28	NA	NA	NA	NA	1.728	200.853	1.728	136.901	1.728	173.519	1.728	127.636	1.728	171.84	1.728	140.878	NA	NA	NA	NA	1.728	194.05	1.728	128.791	1.728	181	1.728	105	1.728	174.019	1.728	122.541	NA	NA	NA	NA	1.728	288.511	1.728	141.506	1.728	134.945	1.728	89.286
					29	NA	NA	NA	NA	1.792	187.456	1.792	142.949	1.792	192.307	1.792	132.73	1.792	173.85	1.792	152.825	NA	NA	NA	NA	1.792	192.668	1.792	140.774	1.792	161	1.792	87	1.792	160.65	1.792	131.232	NA	NA	NA	NA	1.792	300.668	1.792	142.949	NA	NA	NA	NA
					30	NA	NA	NA	NA	1.856	189.519	1.856	136.212	1.856	204.14	1.856	127.534	1.856	182.7	1.856	155.017	NA	NA	NA	NA	1.856	194.165	1.856	146.104	NA	NA	NA	NA	1.856	152.873	1.856	135.678	NA	NA	NA	NA	1.856	280.881	1.856	145.861	NA	NA	NA	NA
					31	NA	NA	NA	NA	1.92	194.867	1.92	136.509	1.92	222.479	1.92	120.464	1.92	171.14	1.92	148.195	NA	NA	NA	NA	1.92	192.262	1.92	152.596	NA	NA	NA	NA	1.92	152.764	1.92	136.088	NA	NA	NA	NA	1.92	271.531	1.92	135.551	NA	NA	NA	NA
					32	NA	NA	NA	NA	1.984	193.446	1.984	146.84	1.984	240.379	1.984	120.033	1.984	161.943	1.984	141.437	NA	NA	NA	NA	1.984	186.435	1.984	150.112	NA	NA	NA	NA	1.984	153.245	1.984	135.546	NA	NA	NA	NA	1.984	256.801	1.984	132.092	NA	NA	NA	NA
					33	NA	NA	NA	NA	2.048	170.783	2.048	144.88	2.048	251.093	2.048	126.843	2.048	166.15	2.048	134.229	NA	NA	NA	NA	2.048	184.535	2.048	152.439	NA	NA	NA	NA	2.048	153.274	2.048	134.328	NA	NA	NA	NA	2.048	233.267	2.048	146.611	NA	NA	NA	NA
					34	NA	NA	NA	NA	2.112	159.258	2.112	144.72	2.112	271.924	2.112	127.25	2.112	177.589	2.112	130.754	NA	NA	NA	NA	2.112	191.608	2.112	154.932	NA	NA	NA	NA	2.112	157.759	2.112	138.043	NA	NA	NA	NA	2.112	218.683	2.112	160.25	NA	NA	NA	NA
					35	NA	NA	NA	NA	2.176	151.702	2.176	154.16	2.176	290.908	2.176	138.634	2.176	188.894	2.176	140.231	NA	NA	NA	NA	2.176	191.587	2.176	145.328	NA	NA	NA	NA	2.176	158.556	2.176	134.535	NA	NA	NA	NA	2.176	201.252	2.176	155.593	NA	NA	NA	NA
					36	NA	NA	NA	NA	2.24	143.373	2.24	148.48	2.24	310.34	2.24	152.2	2.24	201.689	2.24	145.155	NA	NA	NA	NA	2.24	180.44	2.24	132.817	NA	NA	NA	NA	2.24	145.552	2.24	130.826	NA	NA	NA	NA	2.24	221.772	2.24	145.228	NA	NA	NA	NA
					37	NA	NA	NA	NA	2.304	137.619	2.304	143.32	2.304	327.911	2.304	166.576	2.304	194.476	2.304	159.64	NA	NA	NA	NA	2.304	168.021	2.304	123.627	NA	NA	NA	NA	2.304	139.571	2.304	133.994	NA	NA	NA	NA	2.304	254.268	2.304	150.082	NA	NA	NA	NA
					38	NA	NA	NA	NA	2.368	154.165	2.368	148.016	2.368	318.676	2.368	175.987	2.368	177.797	2.368	161.68	NA	NA	NA	NA	2.368	168.111	2.368	129.333	NA	NA	NA	NA	2.368	144.211	2.368	134.012	NA	NA	NA	NA	2.368	249.404	2.368	150.136	NA	NA	NA	NA
					39	NA	NA	NA	NA	2.432	175.241	2.432	145.753	2.432	291.735	2.432	169.997	2.432	183.807	2.432	166.358	NA	NA	NA	NA	2.432	181.799	2.432	143.846	NA	NA	NA	NA	2.432	139.653	2.432	122.864	NA	NA	NA	NA	2.432	226.39	2.432	139.512	NA	NA	NA	NA
					40	NA	NA	NA	NA	2.496	177.318	2.496	145.868	2.496	269.019	2.496	146.988	2.496	184.884	2.496	162.379	NA	NA	NA	NA	2.496	184.802	2.496	148.781	NA	NA	NA	NA	2.496	134.861	2.496	120.366	NA	NA	NA	NA	2.496	250.501	2.496	135.961	NA	NA	NA	NA
					41	NA	NA	NA	NA	2.56	163.877	2.56	148.895	2.56	241.333	2.56	167.731	2.56	204.345	2.56	152.759	NA	NA	NA	NA	2.56	171.959	2.56	141.92	NA	NA	NA	NA	2.56	133.295	2.56	128.782	NA	NA	NA	NA	2.56	312.714	2.56	144.379	NA	NA	NA	NA
					42	NA	NA	NA	NA	2.624	164.301	2.624	145.033	2.624	209.379	2.624	195.307	2.624	213.844	2.624	152.044	NA	NA	NA	NA	2.624	177.676	2.624	135.064	NA	NA	NA	NA	2.624	134.663	2.624	138.837	NA	NA	NA	NA	2.624	339.689	2.624	163.406	NA	NA	NA	NA
					43	NA	NA	NA	NA	2.688	171.859	2.688	135.227	2.688	183.303	2.688	207.597	2.688	215.867	2.688	136.683	NA	NA	NA	NA	2.688	192.216	2.688	140.474	NA	NA	NA	NA	2.688	133.914	2.688	139.649	NA	NA	NA	NA	2.688	319.33	2.688	183.259	NA	NA	NA	NA
					44	NA	NA	NA	NA	2.752	187.3	2.752	130.623	2.752	147.964	2.752	191.084	2.752	221.689	2.752	124.052	NA	NA	NA	NA	2.752	200.99	2.752	141.484	NA	NA	NA	NA	2.752	126.984	2.752	138.22	NA	NA	NA	NA	2.752	330.735	2.752	178.328	NA	NA	NA	NA
					45	NA	NA	NA	NA	2.816	188.42	2.816	137.124	2.816	138.369	2.816	188.298	2.816	223.649	2.816	121.944	NA	NA	NA	NA	2.816	204.52	2.816	139.621	NA	NA	NA	NA	2.816	122.292	2.816	134.585	NA	NA	NA	NA	2.816	303.321	2.816	159.619	NA	NA	NA	NA
					46	NA	NA	NA	NA	2.88	198.7	2.88	153.919	2.88	132.783	2.88	178.795	2.88	203.583	2.88	123.767	NA	NA	NA	NA	2.88	191.3	2.88	138.072	NA	NA	NA	NA	2.88	123.815	2.88	129.944	NA	NA	NA	NA	2.88	255.522	2.88	141.115	NA	NA	NA	NA
					47	NA	NA	NA	NA	2.944	184.929	2.944	169.193	NA	NA	NA	NA	2.944	180.452	2.944	129.896	NA	NA	NA	NA	2.944	180.4	2.944	135.441	NA	NA	NA	NA	2.944	135.82	2.944	125.653	NA	NA	NA	NA	2.944	237.828	2.944	134.261	NA	NA	NA	NA
					48	NA	NA	NA	NA	3.008	175.727	3.008	170.347	NA	NA	NA	NA	3.008	179.483	3.008	134.062	NA	NA	NA	NA	3.008	185.1	3.008	142.166	NA	NA	NA	NA	NA	NA	3.008	127.484	NA	NA	NA	NA	3.008	251.198	3.008	140.176	NA	NA	NA	NA
					49	NA	NA	NA	NA	3.072	186.631	3.072	159.99	NA	NA	NA	NA	3.072	190.8	3.072	155.627	NA	NA	NA	NA	3.072	180.315	NA	NA	NA	NA	NA	NA	NA	NA	3.072	125.267	NA	NA	NA	NA	3.072	274.54	3.072	143.243	NA	NA	NA	NA
					50	NA	NA	NA	NA	3.136	202.101	3.136	140.061	NA	NA	NA	NA	3.136	202.15	3.136	167.735	NA	NA	NA	NA	3.136	166.046	NA	NA	NA	NA	NA	NA	NA	NA	3.136	124.216	NA	NA	NA	NA	3.136	275.945	3.136	132.43	NA	NA	NA	NA
					51	NA	NA	NA	NA	3.2	235.68	3.2	141.941	NA	NA	NA	NA	3.2	208.6	3.2	154.414	NA	NA	NA	NA	3.2	149.336	NA	NA	NA	NA	NA	NA	NA	NA	3.2	131.075	NA	NA	NA	NA	3.2	246.423	3.2	130.901	NA	NA	NA	NA
					52	NA	NA	NA	NA	3.264	224.76	3.264	158.345	NA	NA	NA	NA	3.264	193.1	3.264	138.142	NA	NA	NA	NA	3.264	149.684	NA	NA	NA	NA	NA	NA	NA	NA	3.264	134.664	NA	NA	NA	NA	3.264	231.596	3.264	136.483	NA	NA	NA	NA
					53	NA	NA	NA	NA	3.328	195.8	3.328	163.652	NA	NA	NA	NA	3.328	167.75	3.328	123.52	NA	NA	NA	NA	3.328	156.45	NA	NA	NA	NA	NA	NA	NA	NA	3.328	133.865	NA	NA	NA	NA	3.328	217.105	3.328	141.231	NA	NA	NA	NA
					54	NA	NA	NA	NA	NA	NA	3.392	150.712	NA	NA	NA	NA	3.392	164.85	3.392	126.843	NA	NA	NA	NA	3.392	168.154	NA	NA	NA	NA	NA	NA	NA	NA	3.392	139.072	NA	NA	NA	NA	3.392	183.964	NA	NA	NA	NA	NA	NA
					55	NA	NA	NA	NA	NA	NA	3.456	138.903	NA	NA	NA	NA	3.456	177.1	3.456	153.267	NA	NA	NA	NA	3.456	178.681	NA	NA	NA	NA	NA	NA	NA	NA	3.456	145.934	NA	NA	NA	NA	3.456	167.494	NA	NA	NA	NA	NA	NA
					56	NA	NA	NA	NA	NA	NA	3.52	142.685	NA	NA	NA	NA	3.52	185.25	3.52	166.381	NA	NA	NA	NA	3.52	178.305	NA	NA	NA	NA	NA	NA	NA	NA	3.52	137.816	NA	NA	NA	NA	3.52	170.465	NA	NA	NA	NA	NA	NA
					57	NA	NA	NA	NA	NA	NA	3.584	155.602	NA	NA	NA	NA	3.584	177.25	3.584	177.162	NA	NA	NA	NA	3.584	177.074	NA	NA	NA	NA	NA	NA	NA	NA	NA	NA	NA	NA	NA	NA	3.584	187.199	NA	NA	NA	NA	NA	NA
					58	NA	NA	NA	NA	NA	NA	3.648	144.473	NA	NA	NA	NA	3.648	157.7	3.648	180.309	NA	NA	NA	NA	3.648	193.42	NA	NA	NA	NA	NA	NA	NA	NA	NA	NA	NA	NA	NA	NA	3.648	206.51	NA	NA	NA	NA	NA	NA
					59	NA	NA	NA	NA	NA	NA	3.712	126.814	NA	NA	NA	NA	3.712	150	3.712	179.351	NA	NA	NA	NA	3.712	213.103	NA	NA	NA	NA	NA	NA	NA	NA	NA	NA	NA	NA	NA	NA	3.712	205.638	NA	NA	NA	NA	NA	NA
					60	NA	NA	NA	NA	NA	NA	3.776	121.388	NA	NA	NA	NA	3.776	151.3	3.776	168.631	NA	NA	NA	NA	3.776	211.949	NA	NA	NA	NA	NA	NA	NA	NA	NA	NA	NA	NA	NA	NA	3.776	183.491	NA	NA	NA	NA	NA	NA
					61	NA	NA	NA	NA	NA	NA	3.84	129.82	NA	NA	NA	NA	3.84	144.2	3.84	163.734	NA	NA	NA	NA	3.84	188.456	NA	NA	NA	NA	NA	NA	NA	NA	NA	NA	NA	NA	NA	NA	3.84	162.472	NA	NA	NA	NA	NA	NA
					62	NA	NA	NA	NA	NA	NA	3.904	133.895	NA	NA	NA	NA	3.904	138.7	3.904	154.512	NA	NA	NA	NA	3.904	174.547	NA	NA	NA	NA	NA	NA	NA	NA	NA	NA	NA	NA	NA	NA	3.904	162.63	NA	NA	NA	NA	NA	NA
					63	NA	NA	NA	NA	NA	NA	NA	NA	NA	NA	NA	NA	3.968	147.75	3.968	140.39	NA	NA	NA	NA	3.968	179.005	NA	NA	NA	NA	NA	NA	NA	NA	NA	NA	NA	NA	NA	NA	3.968	179.3	NA	NA	NA	NA	NA	NA
					64	NA	NA	NA	NA	NA	NA	NA	NA	NA	NA	NA	NA	4.032	151.7	4.032	138.785	NA	NA	NA	NA	4.032	201.058	NA	NA	NA	NA	NA	NA	NA	NA	NA	NA	NA	NA	NA	NA	4.032	165	NA	NA	NA	NA	NA	NA
					65	NA	NA	NA	NA	NA	NA	NA	NA	NA	NA	NA	NA	NA	NA	4.096	145.432	NA	NA	NA	NA	4.096	202	NA	NA	NA	NA	NA	NA	NA	NA	NA	NA	NA	NA	NA	NA	4.096	137.35	NA	NA	NA	NA	NA	NA
					66	NA	NA	NA	NA	NA	NA	NA	NA	NA	NA	NA	NA	NA	NA	4.16	144.492	NA	NA	NA	NA	4.16	211.665	NA	NA	NA	NA	NA	NA	NA	NA	NA	NA	NA	NA	NA	NA	4.16	128.75	NA	NA	NA	NA	NA	NA
					67	NA	NA	NA	NA	NA	NA	NA	NA	NA	NA	NA	NA	NA	NA	4.224	150.098	NA	NA	NA	NA	4.224	192.273	NA	NA	NA	NA	NA	NA	NA	NA	NA	NA	NA	NA	NA	NA	4.224	124.6	NA	NA	NA	NA	NA	NA
					68	NA	NA	NA	NA	NA	NA	NA	NA	NA	NA	NA	NA	NA	NA	4.288	157.293	NA	NA	NA	NA	4.288	163.615	NA	NA	NA	NA	NA	NA	NA	NA	NA	NA	NA	NA	NA	NA	4.288	131.65	NA	NA	NA	NA	NA	NA
					69	NA	NA	NA	NA	NA	NA	NA	NA	NA	NA	NA	NA	NA	NA	4.352	141.88	NA	NA	NA	NA	4.352	150.983	NA	NA	NA	NA	NA	NA	NA	NA	NA	NA	NA	NA	NA	NA	4.352	141.5	NA	NA	NA	NA	NA	NA
					70	NA	NA	NA	NA	NA	NA	NA	NA	NA	NA	NA	NA	NA	NA	4.416	129.462	NA	NA	NA	NA	4.416	145.2	NA	NA	NA	NA	NA	NA	NA	NA	NA	NA	NA	NA	NA	NA	NA	NA	NA	NA	NA	NA	NA	NA
					71	NA	NA	NA	NA	NA	NA	NA	NA	NA	NA	NA	NA	NA	NA	4.48	136.029	NA	NA	NA	NA	4.48	138.308	NA	NA	NA	NA	NA	NA	NA	NA	NA	NA	NA	NA	NA	NA	NA	NA	NA	NA	NA	NA	NA	NA
					72	NA	NA	NA	NA	NA	NA	NA	NA	NA	NA	NA	NA	NA	NA	4.544	145.516	NA	NA	NA	NA	4.544	138.17	NA	NA	NA	NA	NA	NA	NA	NA	NA	NA	NA	NA	NA	NA	NA	NA	NA	NA	NA	NA	NA	NA
					73	NA	NA	NA	NA	NA	NA	NA	NA	NA	NA	NA	NA	NA	NA	4.608	139.402	NA	NA	NA	NA	4.608	153.53	NA	NA	NA	NA	NA	NA	NA	NA	NA	NA	NA	NA	NA	NA	NA	NA	NA	NA	NA	NA	NA	NA
					74	NA	NA	NA	NA	NA	NA	NA	NA	NA	NA	NA	NA	NA	NA	NA	NA	NA	NA	NA	NA	4.672	171.175	NA	NA	NA	NA	NA	NA	NA	NA	NA	NA	NA	NA	NA	NA	NA	NA	NA	NA	NA	NA	NA	NA
					75	NA	NA	NA	NA	NA	NA	NA	NA	NA	NA	NA	NA	NA	NA	NA	NA	NA	NA	NA	NA	4.736	176.879	NA	NA	NA	NA	NA	NA	NA	NA	NA	NA	NA	NA	NA	NA	NA	NA	NA	NA	NA	NA	NA	NA
					76	NA	NA	NA	NA	NA	NA	NA	NA	NA	NA	NA	NA	NA	NA	NA	NA	NA	NA	NA	NA	NA	NA	NA	NA	NA	NA	NA	NA	NA	NA	NA	NA	NA	NA	NA	NA	NA	NA	NA	NA	NA	NA	NA	NA
					77	NA	NA	NA	NA	NA	NA	NA	NA	NA	NA	NA	NA	NA	NA	NA	NA	NA	NA	NA	NA	NA	NA	NA	NA	NA	NA	NA	NA	NA	NA	NA	NA	NA	NA	NA	NA	NA	NA	NA	NA	NA	NA	NA	NA
					78	NA	NA	NA	NA	NA	NA	NA	NA	NA	NA	NA	NA	NA	NA	NA	NA	NA	NA	NA	NA	NA	NA	NA	NA	NA	NA	NA	NA	NA	NA	NA	NA	NA	NA	NA	NA	NA	NA	NA	NA	NA	NA	NA	NA
					79	NA	NA	NA	NA	NA	NA	NA	NA	NA	NA	NA	NA	NA	NA	NA	NA	NA	NA	NA	NA	NA	NA	NA	NA	NA	NA	NA	NA	NA	NA	NA	NA	NA	NA	NA	NA	NA	NA	NA	NA	NA	NA	NA	NA
					80	NA	NA	NA	NA	NA	NA	NA	NA	NA	NA	NA	NA	NA	NA	NA	NA	NA	NA	NA	NA	NA	NA	NA	NA	NA	NA	NA	NA	NA	NA	NA	NA	NA	NA	NA	NA	NA	NA	NA	NA	NA	NA	NA	NA
					81	NA	NA	NA	NA	NA	NA	NA	NA	NA	NA	NA	NA	NA	NA	NA	NA	NA	NA	NA	NA	NA	NA	NA	NA	NA	NA	NA	NA	NA	NA	NA	NA	NA	NA	NA	NA	NA	NA	NA	NA	NA	NA	NA	NA
					82	NA	NA	NA	NA	NA	NA	NA	NA	NA	NA	NA	NA	NA	NA	NA	NA	NA	NA	NA	NA	NA	NA	NA	NA	NA	NA	NA	NA	NA	NA	NA	NA	NA	NA	NA	NA	NA	NA	NA	NA	NA	NA	NA	NA
					83	NA	NA	NA	NA	NA	NA	NA	NA	NA	NA	NA	NA	NA	NA	NA	NA	NA	NA	NA	NA	NA	NA	NA	NA	NA	NA	NA	NA	NA	NA	NA	NA	NA	NA	NA	NA	NA	NA	NA	NA	NA	NA	NA	NA
					84	NA	NA	NA	NA	NA	NA	NA	NA	NA	NA	NA	NA	NA	NA	NA	NA	NA	NA	NA	NA	NA	NA	NA	NA	NA	NA	NA	NA	NA	NA	NA	NA	NA	NA	NA	NA	NA	NA	NA	NA	NA	NA	NA	NA
					85	NA	NA	NA	NA	NA	NA	NA	NA	NA	NA	NA	NA	NA	NA	NA	NA	NA	NA	NA	NA	NA	NA	NA	NA	NA	NA	NA	NA	NA	NA	NA	NA	NA	NA	NA	NA	NA	NA	NA	NA	NA	NA	NA	NA
					86	NA	NA	NA	NA	NA	NA	NA	NA	NA	NA	NA	NA	NA	NA	NA	NA	NA	NA	NA	NA	NA	NA	NA	NA	NA	NA	NA	NA	NA	NA	NA	NA	NA	NA	NA	NA	NA	NA	NA	NA	NA	NA	NA	NA
					87	NA	NA	NA	NA	NA	NA	NA	NA	NA	NA	NA	NA	NA	NA	NA	NA	NA	NA	NA	NA	NA	NA	NA	NA	NA	NA	NA	NA	NA	NA	NA	NA	NA	NA	NA	NA	NA	NA	NA	NA	NA	NA	NA	NA
					88	NA	NA	NA	NA	NA	NA	NA	NA	NA	NA	NA	NA	NA	NA	NA	NA	NA	NA	NA	NA	NA	NA	NA	NA	NA	NA	NA	NA	NA	NA	NA	NA	NA	NA	NA	NA	NA	NA	NA	NA	NA	NA	NA	NA
					89	NA	NA	NA	NA	NA	NA	NA	NA	NA	NA	NA	NA	NA	NA	NA	NA	NA	NA	NA	NA	NA	NA	NA	NA	NA	NA	NA	NA	NA	NA	NA	NA	NA	NA	NA	NA	NA	NA	NA	NA	NA	NA	NA	NA
					90	NA	NA	NA	NA	NA	NA	NA	NA	NA	NA	NA	NA	NA	NA	NA	NA	NA	NA	NA	NA	NA	NA	NA	NA	NA	NA	NA	NA	NA	NA	NA	NA	NA	NA	NA	NA	NA	NA	NA	NA	NA	NA	NA	NA
					91	NA	NA	NA	NA	NA	NA	NA	NA	NA	NA	NA	NA	NA	NA	NA	NA	NA	NA	NA	NA	NA	NA	NA	NA	NA	NA	NA	NA	NA	NA	NA	NA	NA	NA	NA	NA	NA	NA	NA	NA	NA	NA	NA	NA
					92	NA	NA	NA	NA	NA	NA	NA	NA	NA	NA	NA	NA	NA	NA	NA	NA	NA	NA	NA	NA	NA	NA	NA	NA	NA	NA	NA	NA	NA	NA	NA	NA	NA	NA	NA	NA	NA	NA	NA	NA	NA	NA	NA	NA
					93	NA	NA	NA	NA	NA	NA	NA	NA	NA	NA	NA	NA	NA	NA	NA	NA	NA	NA	NA	NA	NA	NA	NA	NA	NA	NA	NA	NA	NA	NA	NA	NA	NA	NA	NA	NA	NA	NA	NA	NA	NA	NA	NA	NA
					94	NA	NA	NA	NA	NA	NA	NA	NA	NA	NA	NA	NA	NA	NA	NA	NA	NA	NA	NA	NA	NA	NA	NA	NA	NA	NA	NA	NA	NA	NA	NA	NA	NA	NA	NA	NA	NA	NA	NA	NA	NA	NA	NA	NA
					95	NA	NA	NA	NA	NA	NA	NA	NA	NA	NA	NA	NA	NA	NA	NA	NA	NA	NA	NA	NA	NA	NA	NA	NA	NA	NA	NA	NA	NA	NA	NA	NA	NA	NA	NA	NA	NA	NA	NA	NA	NA	NA	NA	NA
					96	NA	NA	NA	NA	NA	NA	NA	NA	NA	NA	NA	NA	NA	NA	NA	NA	NA	NA	NA	NA	NA	NA	NA	NA	NA	NA	NA	NA	NA	NA	NA	NA	NA	NA	NA	NA	NA	NA	NA	NA	NA	NA	NA	NA
					97	NA	NA	NA	NA	NA	NA	NA	NA	NA	NA	NA	NA	NA	NA	NA	NA	NA	NA	NA	NA	NA	NA	NA	NA	NA	NA	NA	NA	NA	NA	NA	NA	NA	NA	NA	NA	NA	NA	NA	NA	NA	NA	NA	NA
					98	NA	NA	NA	NA	NA	NA	NA	NA	NA	NA	NA	NA	NA	NA	NA	NA	NA	NA	NA	NA	NA	NA	NA	NA	NA	NA	NA	NA	NA	NA	NA	NA	NA	NA	NA	NA	NA	NA	NA	NA	NA	NA	NA	NA
					99	NA	NA	NA	NA	NA	NA	NA	NA	NA	NA	NA	NA	NA	NA	NA	NA	NA	NA	NA	NA	NA	NA	NA	NA	NA	NA	NA	NA	NA	NA	NA	NA	NA	NA	NA	NA	NA	NA	NA	NA	NA	NA	NA	NA
					100	NA	NA	NA	NA	NA	NA	NA	NA	NA	NA	NA	NA	NA	NA	NA	NA	NA	NA	NA	NA	NA	NA	NA	NA	NA	NA	NA	NA	NA	NA	NA	NA	NA	NA	NA	NA	NA	NA	NA	NA	NA	NA	NA	NA
					101	NA	NA	NA	NA	NA	NA	NA	NA	NA	NA	NA	NA	NA	NA	NA	NA	NA	NA	NA	NA	NA	NA	NA	NA	NA	NA	NA	NA	NA	NA	NA	NA	NA	NA	NA	NA	NA	NA	NA	NA	NA	NA	NA	NA
					102	NA	NA	NA	NA	NA	NA	NA	NA	NA	NA	NA	NA	NA	NA	NA	NA	NA	NA	NA	NA	NA	NA	NA	NA	NA	NA	NA	NA	NA	NA	NA	NA	NA	NA	NA	NA	NA	NA	NA	NA	NA	NA	NA	NA
					103	NA	NA	NA	NA	NA	NA	NA	NA	NA	NA	NA	NA	NA	NA	NA	NA	NA	NA	NA	NA	NA	NA	NA	NA	NA	NA	NA	NA	NA	NA	NA	NA	NA	NA	NA	NA	NA	NA	NA	NA	NA	NA	NA	NA
					104	NA	NA	NA	NA	NA	NA	NA	NA	NA	NA	NA	NA	NA	NA	NA	NA	NA	NA	NA	NA	NA	NA	NA	NA	NA	NA	NA	NA	NA	NA	NA	NA	NA	NA	NA	NA	NA	NA	NA	NA	NA	NA	NA	NA
					105	NA	NA	NA	NA	NA	NA	NA	NA	NA	NA	NA	NA	NA	NA	NA	NA	NA	NA	NA	NA	NA	NA	NA	NA	NA	NA	NA	NA	NA	NA	NA	NA	NA	NA	NA	NA	NA	NA	NA	NA	NA	NA	NA	NA
					106	NA	NA	NA	NA	NA	NA	NA	NA	NA	NA	NA	NA	NA	NA	NA	NA	NA	NA	NA	NA	NA	NA	NA	NA	NA	NA	NA	NA	NA	NA	NA	NA	NA	NA	NA	NA	NA	NA	NA	NA	NA	NA	NA	NA
					107	NA	NA	NA	NA	NA	NA	NA	NA	NA	NA	NA	NA	NA	NA	NA	NA	NA	NA	NA	NA	NA	NA	NA	NA	NA	NA	NA	NA	NA	NA	NA	NA	NA	NA	NA	NA	NA	NA	NA	NA	NA	NA	NA	NA
					108	NA	NA	NA	NA	NA	NA	NA	NA	NA	NA	NA	NA	NA	NA	NA	NA	NA	NA	NA	NA	NA	NA	NA	NA	NA	NA	NA	NA	NA	NA	NA	NA	NA	NA	NA	NA	NA	NA	NA	NA	NA	NA	NA	NA
					109	NA	NA	NA	NA	NA	NA	NA	NA	NA	NA	NA	NA	NA	NA	NA	NA	NA	NA	NA	NA	NA	NA	NA	NA	NA	NA	NA	NA	NA	NA	NA	NA	NA	NA	NA	NA	NA	NA	NA	NA	NA	NA	NA	NA
					110	NA	NA	NA	NA	NA	NA	NA	NA	NA	NA	NA	NA	NA	NA	NA	NA	NA	NA	NA	NA	NA	NA	NA	NA	NA	NA	NA	NA	NA	NA	NA	NA	NA	NA	NA	NA	NA	NA	NA	NA	NA	NA	NA	NA
					111	NA	NA	NA	NA	NA	NA	NA	NA	NA	NA	NA	NA	NA	NA	NA	NA	NA	NA	NA	NA	NA	NA	NA	NA	NA	NA	NA	NA	NA	NA	NA	NA	NA	NA	NA	NA	NA	NA	NA	NA	NA	NA	NA	NA
					112	NA	NA	NA	NA	NA	NA	NA	NA	NA	NA	NA	NA	NA	NA	NA	NA	NA	NA	NA	NA	NA	NA	NA	NA	NA	NA	NA	NA	NA	NA	NA	NA	NA	NA	NA	NA	NA	NA	NA	NA	NA	NA	NA	NA
					113	NA	NA	NA	NA	NA	NA	NA	NA	NA	NA	NA	NA	NA	NA	NA	NA	NA	NA	NA	NA	NA	NA	NA	NA	NA	NA	NA	NA	NA	NA	NA	NA	NA	NA	NA	NA	NA	NA	NA	NA	NA	NA	NA	NA
					114	NA	NA	NA	NA	NA	NA	NA	NA	NA	NA	NA	NA	NA	NA	NA	NA	NA	NA	NA	NA	NA	NA	NA	NA	NA	NA	NA	NA	NA	NA	NA	NA	NA	NA	NA	NA	NA	NA	NA	NA	NA	NA	NA	NA
					115	NA	NA	NA	NA	NA	NA	NA	NA	NA	NA	NA	NA	NA	NA	NA	NA	NA	NA	NA	NA	NA	NA	NA	NA	NA	NA	NA	NA	NA	NA	NA	NA	NA	NA	NA	NA	NA	NA	NA	NA	NA	NA	NA	NA
					116	NA	NA	NA	NA	NA	NA	NA	NA	NA	NA	NA	NA	NA	NA	NA	NA	NA	NA	NA	NA	NA	NA	NA	NA	NA	NA	NA	NA	NA	NA	NA	NA	NA	NA	NA	NA	NA	NA	NA	NA	NA	NA	NA	NA
					117	NA	NA	NA	NA	NA	NA	NA	NA	NA	NA	NA	NA	NA	NA	NA	NA	NA	NA	NA	NA	NA	NA	NA	NA	NA	NA	NA	NA	NA	NA	NA	NA	NA	NA	NA	NA	NA	NA	NA	NA	NA	NA	NA	NA
					118	NA	NA	NA	NA	NA	NA	NA	NA	NA	NA	NA	NA	NA	NA	NA	NA	NA	NA	NA	NA	NA	NA	NA	NA	NA	NA	NA	NA	NA	NA	NA	NA	NA	NA	NA	NA	NA	NA	NA	NA	NA	NA	NA	NA
					119	NA	NA	NA	NA	NA	NA	NA	NA	NA	NA	NA	NA	NA	NA	NA	NA	NA	NA	NA	NA	NA	NA	NA	NA	NA	NA	NA	NA	NA	NA	NA	NA	NA	NA	NA	NA	NA	NA	NA	NA	NA	NA	NA	NA
					120	NA	NA	NA	NA	NA	NA	NA	NA	NA	NA	NA	NA	NA	NA	NA	NA	NA	NA	NA	NA	NA	NA	NA	NA	NA	NA	NA	NA	NA	NA	NA	NA	NA	NA	NA	NA	NA	NA	NA	NA	NA	NA	NA	NA
					121	NA	NA	NA	NA	NA	NA	NA	NA	NA	NA	NA	NA	NA	NA	NA	NA	NA	NA	NA	NA	NA	NA	NA	NA	NA	NA	NA	NA	NA	NA	NA	NA	NA	NA	NA	NA	NA	NA	NA	NA	NA	NA	NA	NA
					122	NA	NA	NA	NA	NA	NA	NA	NA	NA	NA	NA	NA	NA	NA	NA	NA	NA	NA	NA	NA	NA	NA	NA	NA	NA	NA	NA	NA	NA	NA	NA	NA	NA	NA	NA	NA	NA	NA	NA	NA	NA	NA	NA	NA
					123	NA	NA	NA	NA	NA	NA	NA	NA	NA	NA	NA	NA	NA	NA	NA	NA	NA	NA	NA	NA	NA	NA	NA	NA	NA	NA	NA	NA	NA	NA	NA	NA	NA	NA	NA	NA	NA	NA	NA	NA	NA	NA	NA	NA
					124	NA	NA	NA	NA	NA	NA	NA	NA	NA	NA	NA	NA	NA	NA	NA	NA	NA	NA	NA	NA	NA	NA	NA	NA	NA	NA	NA	NA	NA	NA	NA	NA	NA	NA	NA	NA	NA	NA	NA	NA	NA	NA	NA	NA
					125	NA	NA	NA	NA	NA	NA	NA	NA	NA	NA	NA	NA	NA	NA	NA	NA	NA	NA	NA	NA	NA	NA	NA	NA	NA	NA	NA	NA	NA	NA	NA	NA	NA	NA	NA	NA	NA	NA	NA	NA	NA	NA	NA	NA
					126	NA	NA	NA	NA	NA	NA	NA	NA	NA	NA	NA	NA	NA	NA	NA	NA	NA	NA	NA	NA	NA	NA	NA	NA	NA	NA	NA	NA	NA	NA	NA	NA	NA	NA	NA	NA	NA	NA	NA	NA	NA	NA	NA	NA
					127	NA	NA	NA	NA	NA	NA	NA	NA	NA	NA	NA	NA	NA	NA	NA	NA	NA	NA	NA	NA	NA	NA	NA	NA	NA	NA	NA	NA	NA	NA	NA	NA	NA	NA	NA	NA	NA	NA	NA	NA	NA	NA	NA	NA
					128	NA	NA	NA	NA	NA	NA	NA	NA	NA	NA	NA	NA	NA	NA	NA	NA	NA	NA	NA	NA	NA	NA	NA	NA	NA	NA	NA	NA	NA	NA	NA	NA	NA	NA	NA	NA	NA	NA	NA	NA	NA	NA	NA	NA
					129	NA	NA	NA	NA	NA	NA	NA	NA	NA	NA	NA	NA	NA	NA	NA	NA	NA	NA	NA	NA	NA	NA	NA	NA	NA	NA	NA	NA	NA	NA	NA	NA	NA	NA	NA	NA	NA	NA	NA	NA	NA	NA	NA	NA
					130	NA	NA	NA	NA	NA	NA	NA	NA	NA	NA	NA	NA	NA	NA	NA	NA	NA	NA	NA	NA	NA	NA	NA	NA	NA	NA	NA	NA	NA	NA	NA	NA	NA	NA	NA	NA	NA	NA	NA	NA	NA	NA	NA	NA
[truncated: 116 more columns]

## Sheet: Gle2_KR
Gle2-GFP						1								2								3								4								5								6
Nup60K467R						Ic				Ir		Ibg		Ic				Ir		Ibg		Ic				Ir		Ibg		Ic				Ir		Ibg		Ic				Ir		Ibg		Ic
							330.618				196.359		145.865		313.797				243.843		155.544		300.293				209.879		150.106		222.054				209.454		152.551		343.646				222.054		142.88		322.064
							184.752								158.252								150.187								69.5038								200.766								183.833
	average	median	SEM	n		Relative accumulation (RA)					50.4932			Relative accumulation (RA)					88.299			Relative accumulation (RA)					59.7736			Relative accumulation (RA)					56.9032			Relative accumulation (RA)					79.1738			Relative accumulation (RA)
RA:	2.14437	2.44182	0.356176	7		3.65895								1.79223								2.5126								1.22144								2.53576								2.44182
	p-value
	0.00159886
						181126_VisSt_Gle2-GFP_TRNM92.3.1_01_01_Crop_1GFP_x_lc	181126_VisSt_Gle2-GFP_TRNM92.3.1_01_01_Crop_1GFP_y_lc	181126_VisSt_Gle2-GFP_TRNM92.3.1_01_01_Crop_1mCh_x_cap	181126_VisSt_Gle2-GFP_TRNM92.3.1_01_01_Crop_1mCh_y_cap	181126_VisSt_Gle2-GFP_TRNM92.3.1_01_01_Crop_1GFP_x_lr	181126_VisSt_Gle2-GFP_TRNM92.3.1_01_01_Crop_1GFP_y_lr	181126_VisSt_Gle2-GFP_TRNM92.3.1_01_01_Crop_1GFP_x_bg	181126_VisSt_Gle2-GFP_TRNM92.3.1_01_01_Crop_1GFP_y_bg	181126_VisSt_Gle2-GFP_TRNM92.3.1_01_03_Crop_1GFP_x_lc	181126_VisSt_Gle2-GFP_TRNM92.3.1_01_03_Crop_1GFP_y_lc	181126_VisSt_Gle2-GFP_TRNM92.3.1_01_03_Crop_1mCh_x_cap	181126_VisSt_Gle2-GFP_TRNM92.3.1_01_03_Crop_1mCh_y_cap	181126_VisSt_Gle2-GFP_TRNM92.3.1_01_03_Crop_1GFP_x_lr	181126_VisSt_Gle2-GFP_TRNM92.3.1_01_03_Crop_1GFP_y_lr	181126_VisSt_Gle2-GFP_TRNM92.3.1_01_03_Crop_1GFP_x_bg	181126_VisSt_Gle2-GFP_TRNM92.3.1_01_03_Crop_1GFP_y_bg	181126_VisSt_Gle2-GFP_TRNM92.3.1_01_06_Crop_1GFP_x_lc	181126_VisSt_Gle2-GFP_TRNM92.3.1_01_06_Crop_1GFP_y_lc	181126_VisSt_Gle2-GFP_TRNM92.3.1_01_06_Crop_1mCh_x_cap	181126_VisSt_Gle2-GFP_TRNM92.3.1_01_06_Crop_1mCh_y_cap	181126_VisSt_Gle2-GFP_TRNM92.3.1_01_06_Crop_1GFP_x_lr	181126_VisSt_Gle2-GFP_TRNM92.3.1_01_06_Crop_1GFP_y_lr	181126_VisSt_Gle2-GFP_TRNM92.3.1_01_06_Crop_1GFP_x_bg	181126_VisSt_Gle2-GFP_TRNM92.3.1_01_06_Crop_1GFP_y_bg	181126_VisSt_Gle2-GFP_TRNM92.3.1_01_06_Crop_2GFP_x_lc	181126_VisSt_Gle2-GFP_TRNM92.3.1_01_06_Crop_2GFP_y_lc	181126_VisSt_Gle2-GFP_TRNM92.3.1_01_06_Crop_2mCh_x_cap	181126_VisSt_Gle2-GFP_TRNM92.3.1_01_06_Crop_2mCh_y_cap	181126_VisSt_Gle2-GFP_TRNM92.3.1_01_06_Crop_2GFP_x_lr	181126_VisSt_Gle2-GFP_TRNM92.3.1_01_06_Crop_2GFP_y_lr	181126_VisSt_Gle2-GFP_TRNM92.3.1_01_06_Crop_2GFP_x_bg	181126_VisSt_Gle2-GFP_TRNM92.3.1_01_06_Crop_2GFP_y_bg	181126_VisSt_Gle2-GFP_TRNM92.3.1_01_06_Crop_3GFP_x_lc	181126_VisSt_Gle2-GFP_TRNM92.3.1_01_06_Crop_3GFP_y_lc	181126_VisSt_Gle2-GFP_TRNM92.3.1_01_06_Crop_3mCh_x_cap	181126_VisSt_Gle2-GFP_TRNM92.3.1_01_06_Crop_3mCh_y_cap	181126_VisSt_Gle2-GFP_TRNM92.3.1_01_06_Crop_3GFP_x_lr	181126_VisSt_Gle2-GFP_TRNM92.3.1_01_06_Crop_3GFP_y_lr	181126_VisSt_Gle2-GFP_TRNM92.3.1_01_06_Crop_3GFP_x_bg	181126_VisSt_Gle2-GFP_TRNM92.3.1_01_06_Crop_3GFP_y_bg	181126_VisSt_Gle2-GFP_TRNM92.3.1_01_06_Crop_4GFP_x_lc	181126_VisSt_Gle2-GFP_TRNM92.3.1_01_06_Crop_4GFP_y_lc	181126_VisSt_Gle2-GFP_TRNM92.3.1_01_06_Crop_4mCh_x_cap	181126_VisSt_Gle2-GFP_TRNM92.3.1_01_06_Crop_4mCh_y_cap
					1	0	534	0	106	0	138	0	147	0	222	0	238	0	199	0	173	0	264	0	105	0	132	0	144	0	256	0	110	0	254	0	164	0	297	0	214	0	330	0	134	0	296	0	312
					2	0.064	531.275	0.064	156.63	0.064	137.883	0.064	146.813	0.064	218.536	0.064	227.175	0.064	195.045	0.064	160	0.064	273.536	0.064	106.995	0.064	135.225	0.064	151.192	0.064	238.555	0.064	123.641	0.064	244.121	0.064	158.397	0.064	284.531	0.064	234.913	0.064	314.074	0.064	133.278	0.064	306.529	0.064	253.038
					3	0.128	461.35	0.128	241.775	0.128	129.8	0.128	165.179	0.128	260.288	0.128	202.5	0.128	175.444	0.128	168.72	0.128	283.61	0.128	94.951	0.128	146.772	0.128	155.141	0.128	222.338	0.128	143.12	0.128	224.597	0.128	152.439	0.128	258.234	0.128	261.929	0.128	263.83	0.128	135.688	0.128	328.076	0.128	203.586
					4	0.192	391.595	0.192	354.909	0.192	125.275	0.192	174.261	0.192	283.75	0.192	180.748	0.192	171.65	0.192	166.483	0.192	300.2	0.192	85.697	0.192	161.166	0.192	157.676	0.192	199.163	0.192	155.351	0.192	227.413	0.192	151.916	0.192	233.703	0.192	326.018	0.192	229.516	0.192	138.437	0.192	344.706	0.192	165.177
					5	0.256	376.508	0.256	513.264	0.256	141.055	0.256	147.458	0.256	290.635	0.256	157.117	0.256	172.003	0.256	147.593	0.256	301.23	0.256	84.965	0.256	181.501	0.256	155.725	0.256	173.537	0.256	162.343	0.256	235.123	0.256	145.395	0.256	239.75	0.256	390.275	0.256	212.547	0.256	149.937	0.256	362.942	0.256	145.236
					6	0.32	393.947	0.32	670.031	0.32	185.505	0.32	137.779	0.32	298.52	0.32	200.34	0.32	172.178	0.32	133.997	0.32	317.879	0.32	86.026	0.32	213.276	0.32	150.057	0.32	184.313	0.32	164.053	0.32	221.665	0.32	135.75	0.32	265.556	0.32	445.44	0.32	186.965	0.32	163.498	0.32	352.043	0.32	137.462
					7	0.384	428.8	0.384	671.123	0.384	236.69	0.384	145.787	0.384	316.18	0.384	342.23	0.384	163.217	0.384	136.658	0.384	341.476	0.384	90.766	0.384	242.418	0.384	141.668	0.384	195.284	0.384	148.285	0.384	203.796	0.384	143.171	0.384	324.714	0.384	406.456	0.384	163.217	0.384	165.737	0.384	318.848	0.384	127.471
					8	0.448	461.589	0.448	536.1	0.448	267.919	0.448	141.265	0.448	336.8	0.448	612.04	0.448	158.977	0.448	151.49	0.448	344.897	0.448	87.919	0.448	254.284	0.448	146.049	0.448	194.447	0.448	125.952	0.448	190.365	0.448	150.398	0.448	454.798	0.448	334.693	0.448	158.047	0.448	160.23	0.448	307.156	0.448	114.716
					9	0.512	409.846	0.512	394.235	0.512	266.502	0.512	130.667	0.512	369.91	0.512	1007.39	0.512	172.922	0.512	157.203	0.512	356.871	0.512	82.408	0.512	243.586	0.512	151.628	0.512	191.661	0.512	135.152	0.512	189.494	0.512	153.266	0.512	595.28	0.512	220.186	0.512	150.893	0.512	161.523	0.512	341.326	0.512	101.108
					10	0.576	290.557	0.576	228.557	0.576	235.993	0.576	139.149	0.576	418.57	0.576	1372.15	0.576	207.432	0.576	158.231	0.576	366.024	0.576	81.418	0.576	243.422	0.576	145.761	0.576	194.076	0.576	150.111	0.576	194.242	0.576	143.895	0.576	620.184	0.576	326.191	0.576	152.188	0.576	162.984	0.576	366.331	0.576	84.233
					11	0.64	199.133	0.64	168.514	0.64	176.017	0.64	143.42	0.64	456.936	0.64	1654.51	0.64	250.798	0.64	161.407	0.64	362.613	0.64	89.241	0.64	266.739	0.64	138.496	0.64	190.127	0.64	150.161	0.64	187.535	0.64	146.902	0.64	580.191	0.64	411.887	0.64	172.078	0.64	158.855	0.64	376.924	0.64	76.315
					12	0.704	165.613	0.704	125.155	0.704	157.485	0.704	144.905	0.704	447.501	0.704	1756.9	0.704	296.624	0.704	161.657	0.704	364.895	0.704	99.844	0.704	261.724	0.704	142.773	0.704	191.665	0.704	140.678	0.704	178.053	0.704	153.896	0.704	530.096	0.704	437.922	0.704	187.777	0.704	150.072	0.704	390.577	0.704	87.379
					13	0.768	194.034	0.768	103.272	0.768	151.359	0.768	142.07	0.768	398.973	0.768	1526.99	0.768	307.351	0.768	144.579	0.768	352.446	0.768	102.536	0.768	271.063	0.768	152.873	0.768	197.502	0.768	137.222	0.768	164.335	0.768	150.619	0.768	534.279	0.768	448.518	0.768	187.291	0.768	146.076	0.768	382.271	0.768	106.169
					14	0.832	277.246	0.832	89.422	0.832	142.962	0.832	145.655	0.832	333.747	0.832	1079.23	0.832	291.189	0.832	131.576	0.832	338.617	0.832	99.599	0.832	286.245	0.832	158.819	0.832	201.106	0.832	126.201	0.832	146.096	0.832	144.617	0.832	493.332	0.832	388.106	0.832	190.682	0.832	145.219	0.832	321.136	0.832	128.16
					15	0.896	413.664	0.896	76.6	0.896	134.58	0.896	155.344	0.896	280.824	0.896	951.231	0.896	266.666	0.896	141.857	0.896	342.474	0.896	94.021	0.896	321.371	0.896	149.321	0.896	206.061	0.896	112.295	0.896	131.197	0.896	143.389	0.896	448.692	0.896	322.15	0.896	203.485	0.896	150.244	0.896	268.865	0.896	166.457
					16	0.96	550.223	0.96	66.106	0.96	132.074	0.96	138.458	0.96	269.819	0.96	887.676	0.96	276.519	0.96	147.364	0.96	323.801	0.96	99.501	0.96	359.212	0.96	139.4	0.96	208.268	0.96	114.854	0.96	138.626	0.96	141.344	0.96	421.342	0.96	304.59	0.96	205.389	0.96	155.75	0.96	259.31	0.96	212.501
					17	1.024	605.598	1.024	59.28	1.024	153.317	1.024	125.399	1.024	230.453	1.024	706.288	1.024	282.373	1.024	145.062	1.024	301.336	1.024	110.432	1.024	350.489	1.024	132.378	1.024	204.719	1.024	127.683	1.024	144.489	1.024	146.253	1.024	376.781	1.024	248.939	1.024	219.842	1.024	155.97	1.024	289.693	1.024	248.982
					18	1.088	521.303	1.088	54.796	1.088	160.249	1.088	133.531	1.088	214.895	1.088	472.26	1.088	267.402	1.088	136.523	1.088	258.186	1.088	124.644	1.088	332.178	1.088	138.74	1.088	205.539	1.088	131.042	1.088	149.25	1.088	160.255	1.088	297.598	1.088	181.211	1.088	235.755	1.088	147.446	1.088	312.617	1.088	255.847
					19	1.152	360.603	1.152	53.267	1.152	162.325	1.152	129.549	NA	NA	NA	NA	1.152	260.168	1.152	163.043	1.152	231.12	1.152	140.31	1.152	313.399	1.152	149.441	1.152	214.984	1.152	129.332	1.152	150.979	1.152	161.796	1.152	228.921	1.152	126.34	1.152	245.283	1.152	136.954	1.152	311.121	1.152	213.178
					20	1.216	303.136	1.216	57.911	1.216	182.158	1.216	135.566	NA	NA	NA	NA	1.216	274.576	1.216	192.121	1.216	216.67	1.216	149.51	1.216	246.311	1.216	149.062	1.216	230.227	1.216	129.817	1.216	151.788	1.216	155.174	1.216	215.204	1.216	92.549	1.216	258.646	1.216	129.912	1.216	286.696	1.216	149.978
					21	1.28	270.266	1.28	67.323	1.28	195.973	1.28	143.79	NA	NA	NA	NA	1.28	249.37	1.28	173.758	1.28	196.24	1.28	150.96	1.28	224.963	1.28	150.519	1.28	236.001	1.28	124.573	1.28	151.28	1.28	153.684	1.28	211.262	1.28	80.161	1.28	238.606	1.28	131.996	1.28	259.751	1.28	157.936
					22	1.344	214.454	1.344	82.833	1.344	205.914	1.344	142.477	NA	NA	NA	NA	1.344	218.02	1.344	166.818	1.344	168.32	1.344	159.37	1.344	224.529	1.344	155.087	1.344	217.455	1.344	119.772	1.344	152.56	1.344	150.058	1.344	207.611	1.344	69.241	1.344	237.43	1.344	133.911	1.344	271.373	1.344	140.72
					23	1.408	180.228	1.408	101.113	1.408	224.915	1.408	138.791	NA	NA	NA	NA	1.408	230.922	1.408	158.807	NA	NA	NA	NA	1.408	191.568	1.408	156.613	1.408	194.184	1.408	122.531	1.408	160.28	1.408	145.206	1.408	227.274	1.408	57.537	1.408	239.627	1.408	142.347	1.408	287.771	1.408	118.931
					24	1.472	151.577	1.472	117.182	1.472	233.581	1.472	134.204	NA	NA	NA	NA	1.472	253.313	1.472	152.379	NA	NA	NA	NA	1.472	169.655	1.472	148.687	1.472	185.299	1.472	127.057	1.472	176.76	1.472	151.123	1.472	241.604	1.472	58.615	1.472	241.114	1.472	155.307	1.472	313	1.472	103
					25	1.536	137.399	1.536	153.658	1.536	225.26	1.536	129.918	NA	NA	NA	NA	1.536	244.098	1.536	157.162	NA	NA	NA	NA	1.536	168.733	1.536	153.105	1.536	200.715	1.536	133.084	1.536	197.88	1.536	154.544	1.536	248.808	1.536	63.31	1.536	238.149	1.536	150.919	1.536	358.146	1.536	106.791
					26	1.6	133.925	1.6	172.043	1.6	230.127	1.6	130.93	NA	NA	NA	NA	1.6	248.861	1.6	157.181	NA	NA	NA	NA	1.6	173.907	1.6	160.897	1.6	211.529	1.6	131.357	1.6	206.32	1.6	156.155	1.6	253.613	1.6	62.816	1.6	237.674	1.6	140.276	1.6	360.462	1.6	100.172
					27	1.664	147.73	1.664	218.805	1.664	244.411	1.664	140.676	NA	NA	NA	NA	1.664	268.084	1.664	149.355	NA	NA	NA	NA	1.664	172.384	1.664	157.191	1.664	202.349	1.664	123.585	1.664	186.76	1.664	156.395	1.664	265.008	1.664	60.789	1.664	265.499	1.664	140.795	NA	NA	NA	NA
					28	1.728	157.692	1.728	211.884	1.728	248.296	1.728	150.875	NA	NA	NA	NA	1.728	293.168	1.728	151.4	NA	NA	NA	NA	1.728	175.729	1.728	156.177	1.728	205.814	1.728	112.292	1.728	184	1.728	155.435	1.728	266.722	1.728	61.952	1.728	294.551	1.728	139.409	NA	NA	NA	NA
					29	1.792	156.413	1.792	191.95	1.792	229.859	1.792	151.498	NA	NA	NA	NA	1.792	320.291	1.792	153.403	NA	NA	NA	NA	1.792	173.984	1.792	161.87	1.792	211.7	1.792	109.15	1.792	183.44	1.792	162.395	NA	NA	NA	NA	1.792	296.949	1.792	137.371	NA	NA	NA	NA
					30	1.856	140.819	1.856	167.688	1.856	204.407	1.856	144.436	NA	NA	NA	NA	1.856	306.883	1.856	154.251	NA	NA	NA	NA	1.856	163.399	1.856	157.779	1.856	223.4	1.856	92.85	1.856	176.92	1.856	152.289	NA	NA	NA	NA	1.856	273.091	1.856	139.372	NA	NA	NA	NA
					31	1.92	119.513	1.92	120.531	1.92	183.959	1.92	140.982	NA	NA	NA	NA	1.92	331.742	1.92	158.953	NA	NA	NA	NA	1.92	167.443	1.92	147.878	1.92	258.2	1.92	79.65	1.92	175.52	1.92	142.296	NA	NA	NA	NA	1.92	263.351	1.92	152.092	NA	NA	NA	NA
					32	1.984	116.734	1.984	77.961	1.984	188.842	1.984	137.813	NA	NA	NA	NA	1.984	376.711	1.984	171.049	NA	NA	NA	NA	1.984	172.04	1.984	145	1.984	268.55	1.984	79.95	1.984	168.516	1.984	139.686	NA	NA	NA	NA	1.984	275.35	1.984	151.038	NA	NA	NA	NA
					33	2.048	119.223	2.048	57.333	2.048	237.693	2.048	129.712	NA	NA	NA	NA	2.048	381.114	2.048	170.212	NA	NA	NA	NA	2.048	172.854	2.048	152.385	2.048	236.7	2.048	80	2.048	167.977	2.048	144.577	NA	NA	NA	NA	2.048	292.442	2.048	142.239	NA	NA	NA	NA
					34	2.112	118.219	2.112	49.582	2.112	279.182	2.112	128.342	NA	NA	NA	NA	2.112	351.963	2.112	158.251	NA	NA	NA	NA	2.112	172.401	2.112	157.756	2.112	229.927	2.112	77.563	2.112	169.912	2.112	148.187	NA	NA	NA	NA	2.112	318.727	2.112	137.825	NA	NA	NA	NA
					35	2.176	116.304	2.176	48.503	2.176	280.956	2.176	135.04	NA	NA	NA	NA	2.176	334.741	2.176	156.716	NA	NA	NA	NA	2.176	170.194	2.176	154.781	2.176	218.79	2.176	83.872	2.176	167.301	2.176	137.694	NA	NA	NA	NA	2.176	328.6	2.176	136.114	NA	NA	NA	NA
					36	2.24	107.179	2.24	55.118	2.24	254.588	2.24	141.157	NA	NA	NA	NA	2.24	338.994	2.24	159.33	NA	NA	NA	NA	2.24	170.551	2.24	155.636	2.24	222.843	2.24	116.672	2.24	173.12	2.24	128.511	NA	NA	NA	NA	2.24	298.325	2.24	135.683	NA	NA	NA	NA
					37	2.304	112.33	2.304	70.927	2.304	238.003	2.304	147.479	NA	NA	NA	NA	2.304	324.768	2.304	163.826	NA	NA	NA	NA	2.304	173.515	2.304	158.586	2.304	255.339	2.304	199.717	2.304	187.334	2.304	136.1	NA	NA	NA	NA	2.304	272.168	2.304	136.973	NA	NA	NA	NA
					38	2.368	164.612	2.368	102.016	2.368	235.762	2.368	166.251	NA	NA	NA	NA	2.368	299.351	2.368	161.628	NA	NA	NA	NA	2.368	169.189	2.368	158.255	2.368	287.837	2.368	331.474	2.368	207.418	2.368	151.412	NA	NA	NA	NA	2.368	266.024	2.368	137.219	NA	NA	NA	NA
					39	2.432	269.904	2.432	148.895	2.432	220.636	2.432	171.152	NA	NA	NA	NA	2.432	269.573	2.432	158.675	NA	NA	NA	NA	2.432	169.116	2.432	146.351	2.432	288.481	2.432	509.747	2.432	232.869	2.432	165.259	NA	NA	NA	NA	2.432	281.649	2.432	136.762	NA	NA	NA	NA
					40	2.496	479.795	2.496	227.162	2.496	187.071	2.496	148.227	NA	NA	NA	NA	2.496	241.503	2.496	163.452	NA	NA	NA	NA	2.496	175.392	2.496	132.662	2.496	289.794	2.496	650.555	2.496	257.491	2.496	170.177	NA	NA	NA	NA	2.496	297.439	2.496	137.077	NA	NA	NA	NA
					41	2.56	723.521	2.56	309.615	2.56	184.447	2.56	146.944	NA	NA	NA	NA	2.56	245.813	2.56	163.337	NA	NA	NA	NA	2.56	167.589	2.56	136.921	2.56	297.675	2.56	704.158	2.56	271.563	2.56	172.496	NA	NA	NA	NA	2.56	311.877	2.56	149.06	NA	NA	NA	NA
					42	2.624	745.99	2.624	343.603	2.624	209.876	2.624	158.456	NA	NA	NA	NA	2.624	256.844	2.624	159.182	NA	NA	NA	NA	2.624	166.046	NA	NA	2.624	281.633	2.624	676.309	2.624	307.249	2.624	162.83	NA	NA	NA	NA	2.624	291.169	2.624	147.976	NA	NA	NA	NA
					43	2.688	663.401	2.688	291.262	2.688	214.357	2.688	158.985	NA	NA	NA	NA	2.688	253.507	2.688	158.296	NA	NA	NA	NA	2.688	177.696	NA	NA	2.688	249.65	2.688	571.7	2.688	349.171	2.688	156.736	NA	NA	NA	NA	2.688	281.594	2.688	140.023	NA	NA	NA	NA
					44	2.752	561.828	2.752	213.854	2.752	198.723	2.752	155.053	NA	NA	NA	NA	2.752	257.55	2.752	161.46	NA	NA	NA	NA	2.752	178.537	NA	NA	2.752	208.877	2.752	447.003	2.752	323.242	2.752	157.334	NA	NA	NA	NA	2.752	261.856	2.752	141.802	NA	NA	NA	NA
					45	2.816	489.74	2.816	165.319	2.816	176.607	2.816	150.991	NA	NA	NA	NA	2.816	260.246	2.816	153.209	NA	NA	NA	NA	2.816	174.105	NA	NA	2.816	186.231	2.816	345.167	2.816	274.273	2.816	155.227	NA	NA	NA	NA	2.816	250.068	2.816	150.299	NA	NA	NA	NA
					46	2.88	443.4	2.88	133.146	2.88	169.001	2.88	150.085	NA	NA	NA	NA	2.88	247.098	2.88	134.691	NA	NA	NA	NA	2.88	184.606	NA	NA	2.88	189.217	2.88	234.231	2.88	268.444	2.88	151.585	NA	NA	NA	NA	2.88	240.632	2.88	143.653	NA	NA	NA	NA
					47	2.944	465.239	2.944	110.511	2.944	163.521	2.944	163.465	NA	NA	NA	NA	2.944	229.983	2.944	125.997	NA	NA	NA	NA	2.944	211.288	NA	NA	2.944	216.645	2.944	166.319	2.944	266.229	2.944	152.582	NA	NA	NA	NA	2.944	225.042	2.944	134.498	NA	NA	NA	NA
					48	3.008	492.189	3.008	100.616	3.008	158.12	3.008	168.747	NA	NA	NA	NA	3.008	227.234	3.008	122.108	NA	NA	NA	NA	3.008	205.792	NA	NA	3.008	240.502	3.008	133.329	3.008	256.86	3.008	149.997	NA	NA	NA	NA	3.008	195.957	3.008	130.942	NA	NA	NA	NA
					49	NA	NA	NA	NA	3.072	171.518	3.072	146.912	NA	NA	NA	NA	3.072	239.523	3.072	137.731	NA	NA	NA	NA	3.072	215.839	NA	NA	3.072	249.247	3.072	122.867	3.072	254.438	3.072	147.116	NA	NA	NA	NA	3.072	170.787	3.072	129.637	NA	NA	NA	NA
					50	NA	NA	NA	NA	3.136	199.911	3.136	135.429	NA	NA	NA	NA	3.136	241.904	3.136	174.34	NA	NA	NA	NA	3.136	256.827	NA	NA	3.136	238.557	3.136	114.655	3.136	268.896	3.136	152.432	NA	NA	NA	NA	3.136	168.999	3.136	131.307	NA	NA	NA	NA
					51	NA	NA	NA	NA	3.2	202.5	3.2	147.753	NA	NA	NA	NA	3.2	215.82	3.2	177.768	NA	NA	NA	NA	3.2	279.832	NA	NA	NA	NA	NA	NA	3.2	286.762	3.2	159.762	NA	NA	NA	NA	3.2	176.352	3.2	133.006	NA	NA	NA	NA
					52	NA	NA	NA	NA	3.264	206.444	3.264	158.458	NA	NA	NA	NA	3.264	166.75	3.264	159.384	NA	NA	NA	NA	3.264	275.037	NA	NA	NA	NA	NA	NA	3.264	260.562	3.264	163.139	NA	NA	NA	NA	3.264	184.265	3.264	133.963	NA	NA	NA	NA
					53	NA	NA	NA	NA	3.328	200.827	3.328	154.926	NA	NA	NA	NA	3.328	146.51	3.328	151.184	NA	NA	NA	NA	3.328	207.84	NA	NA	NA	NA	NA	NA	3.328	232.017	3.328	165.399	NA	NA	NA	NA	3.328	193.865	3.328	132.718	NA	NA	NA	NA
					54	NA	NA	NA	NA	3.392	180.935	3.392	147.319	NA	NA	NA	NA	3.392	151.72	3.392	148.533	NA	NA	NA	NA	3.392	176.183	NA	NA	NA	NA	NA	NA	3.392	222.973	3.392	156.015	NA	NA	NA	NA	3.392	198.853	3.392	127.046	NA	NA	NA	NA
					55	NA	NA	NA	NA	NA	NA	3.456	144.608	NA	NA	NA	NA	3.456	169.76	3.456	152.54	NA	NA	NA	NA	3.456	166.028	NA	NA	NA	NA	NA	NA	3.456	226.805	3.456	141.547	NA	NA	NA	NA	3.456	196.789	3.456	136.647	NA	NA	NA	NA
					56	NA	NA	NA	NA	NA	NA	3.52	147.348	NA	NA	NA	NA	3.52	193.51	NA	NA	NA	NA	NA	NA	3.52	159.536	NA	NA	NA	NA	NA	NA	3.52	225.582	3.52	141.648	NA	NA	NA	NA	3.52	187.882	3.52	149.866	NA	NA	NA	NA
					57	NA	NA	NA	NA	NA	NA	3.584	155.848	NA	NA	NA	NA	3.584	193.79	NA	NA	NA	NA	NA	NA	3.584	171.239	NA	NA	NA	NA	NA	NA	3.584	232.971	3.584	155.124	NA	NA	NA	NA	3.584	176.457	3.584	153.234	NA	NA	NA	NA
					58	NA	NA	NA	NA	NA	NA	NA	NA	NA	NA	NA	NA	3.648	183.794	NA	NA	NA	NA	NA	NA	3.648	209.363	NA	NA	NA	NA	NA	NA	NA	NA	3.648	161.731	NA	NA	NA	NA	3.648	164.463	3.648	143.146	NA	NA	NA	NA
					59	NA	NA	NA	NA	NA	NA	NA	NA	NA	NA	NA	NA	3.712	190.28	NA	NA	NA	NA	NA	NA	3.712	253.52	NA	NA	NA	NA	NA	NA	NA	NA	3.712	160.497	NA	NA	NA	NA	3.712	165.18	3.712	139.2	NA	NA	NA	NA
					60	NA	NA	NA	NA	NA	NA	NA	NA	NA	NA	NA	NA	3.776	210.29	NA	NA	NA	NA	NA	NA	3.776	255.859	NA	NA	NA	NA	NA	NA	NA	NA	3.776	165.351	NA	NA	NA	NA	3.776	174.091	3.776	146.438	NA	NA	NA	NA
					61	NA	NA	NA	NA	NA	NA	NA	NA	NA	NA	NA	NA	3.84	217.411	NA	NA	NA	NA	NA	NA	3.84	231.06	NA	NA	NA	NA	NA	NA	NA	NA	3.84	171.804	NA	NA	NA	NA	3.84	176.349	3.84	148.533	NA	NA	NA	NA
					62	NA	NA	NA	NA	NA	NA	NA	NA	NA	NA	NA	NA	3.904	210.415	NA	NA	NA	NA	NA	NA	3.904	215.74	NA	NA	NA	NA	NA	NA	NA	NA	3.904	165.962	NA	NA	NA	NA	3.904	185.607	3.904	142.218	NA	NA	NA	NA
					63	NA	NA	NA	NA	NA	NA	NA	NA	NA	NA	NA	NA	3.968	220.777	NA	NA	NA	NA	NA	NA	3.968	189.92	NA	NA	NA	NA	NA	NA	NA	NA	3.968	143.537	NA	NA	NA	NA	3.968	207.553	3.968	136.935	NA	NA	NA	NA
					64	NA	NA	NA	NA	NA	NA	NA	NA	NA	NA	NA	NA	4.032	243.903	NA	NA	NA	NA	NA	NA	4.032	182.06	NA	NA	NA	NA	NA	NA	NA	NA	4.032	134.929	NA	NA	NA	NA	4.032	219.976	4.032	145.296	NA	NA	NA	NA
					65	NA	NA	NA	NA	NA	NA	NA	NA	NA	NA	NA	NA	4.096	262.358	NA	NA	NA	NA	NA	NA	4.096	187.92	NA	NA	NA	NA	NA	NA	NA	NA	4.096	144.583	NA	NA	NA	NA	4.096	223.389	4.096	148.762	NA	NA	NA	NA
					66	NA	NA	NA	NA	NA	NA	NA	NA	NA	NA	NA	NA	4.16	259.102	NA	NA	NA	NA	NA	NA	4.16	179.94	NA	NA	NA	NA	NA	NA	NA	NA	4.16	153.275	NA	NA	NA	NA	4.16	212.182	4.16	140.667	NA	NA	NA	NA
					67	NA	NA	NA	NA	NA	NA	NA	NA	NA	NA	NA	NA	4.224	236.297	NA	NA	NA	NA	NA	NA	4.224	174.22	NA	NA	NA	NA	NA	NA	NA	NA	4.224	164.537	NA	NA	NA	NA	4.224	195.031	4.224	136.265	NA	NA	NA	NA
					68	NA	NA	NA	NA	NA	NA	NA	NA	NA	NA	NA	NA	4.288	204.143	NA	NA	NA	NA	NA	NA	4.288	196.24	NA	NA	NA	NA	NA	NA	NA	NA	4.288	158.562	NA	NA	NA	NA	4.288	174.263	4.288	137.86	NA	NA	NA	NA
					69	NA	NA	NA	NA	NA	NA	NA	NA	NA	NA	NA	NA	NA	NA	NA	NA	NA	NA	NA	NA	4.352	220.12	NA	NA	NA	NA	NA	NA	NA	NA	4.352	156.193	NA	NA	NA	NA	4.352	154.583	4.352	137.71	NA	NA	NA	NA
					70	NA	NA	NA	NA	NA	NA	NA	NA	NA	NA	NA	NA	NA	NA	NA	NA	NA	NA	NA	NA	4.416	232.15	NA	NA	NA	NA	NA	NA	NA	NA	NA	NA	NA	NA	NA	NA	4.416	145.811	4.416	136.364	NA	NA	NA	NA
					71	NA	NA	NA	NA	NA	NA	NA	NA	NA	NA	NA	NA	NA	NA	NA	NA	NA	NA	NA	NA	4.48	247	NA	NA	NA	NA	NA	NA	NA	NA	NA	NA	NA	NA	NA	NA	4.48	158.81	NA	NA	NA	NA	NA	NA
					72	NA	NA	NA	NA	NA	NA	NA	NA	NA	NA	NA	NA	NA	NA	NA	NA	NA	NA	NA	NA	4.544	246.94	NA	NA	NA	NA	NA	NA	NA	NA	NA	NA	NA	NA	NA	NA	4.544	169.543	NA	NA	NA	NA	NA	NA
					73	NA	NA	NA	NA	NA	NA	NA	NA	NA	NA	NA	NA	NA	NA	NA	NA	NA	NA	NA	NA	4.608	244.836	NA	NA	NA	NA	NA	NA	NA	NA	NA	NA	NA	NA	NA	NA	4.608	168.512	NA	NA	NA	NA	NA	NA
					74	NA	NA	NA	NA	NA	NA	NA	NA	NA	NA	NA	NA	NA	NA	NA	NA	NA	NA	NA	NA	4.672	226.59	NA	NA	NA	NA	NA	NA	NA	NA	NA	NA	NA	NA	NA	NA	4.672	162.832	NA	NA	NA	NA	NA	NA
					75	NA	NA	NA	NA	NA	NA	NA	NA	NA	NA	NA	NA	NA	NA	NA	NA	NA	NA	NA	NA	4.736	202.877	NA	NA	NA	NA	NA	NA	NA	NA	NA	NA	NA	NA	NA	NA	4.736	163.012	NA	NA	NA	NA	NA	NA
					76	NA	NA	NA	NA	NA	NA	NA	NA	NA	NA	NA	NA	NA	NA	NA	NA	NA	NA	NA	NA	4.8	192.474	NA	NA	NA	NA	NA	NA	NA	NA	NA	NA	NA	NA	NA	NA	4.8	174.509	NA	NA	NA	NA	NA	NA
					77	NA	NA	NA	NA	NA	NA	NA	NA	NA	NA	NA	NA	NA	NA	NA	NA	NA	NA	NA	NA	4.864	186.073	NA	NA	NA	NA	NA	NA	NA	NA	NA	NA	NA	NA	NA	NA	4.864	182.561	NA	NA	NA	NA	NA	NA
					78	NA	NA	NA	NA	NA	NA	NA	NA	NA	NA	NA	NA	NA	NA	NA	NA	NA	NA	NA	NA	4.928	184.412	NA	NA	NA	NA	NA	NA	NA	NA	NA	NA	NA	NA	NA	NA	4.928	199.985	NA	NA	NA	NA	NA	NA
					79	NA	NA	NA	NA	NA	NA	NA	NA	NA	NA	NA	NA	NA	NA	NA	NA	NA	NA	NA	NA	4.992	185.951	NA	NA	NA	NA	NA	NA	NA	NA	NA	NA	NA	NA	NA	NA	4.992	208.097	NA	NA	NA	NA	NA	NA
					80	NA	NA	NA	NA	NA	NA	NA	NA	NA	NA	NA	NA	NA	NA	NA	NA	NA	NA	NA	NA	5.056	195.693	NA	NA	NA	NA	NA	NA	NA	NA	NA	NA	NA	NA	NA	NA	5.056	229.825	NA	NA	NA	NA	NA	NA
					81	NA	NA	NA	NA	NA	NA	NA	NA	NA	NA	NA	NA	NA	NA	NA	NA	NA	NA	NA	NA	5.12	205.725	NA	NA	NA	NA	NA	NA	NA	NA	NA	NA	NA	NA	NA	NA	5.12	248.532	NA	NA	NA	NA	NA	NA
					82	NA	NA	NA	NA	NA	NA	NA	NA	NA	NA	NA	NA	NA	NA	NA	NA	NA	NA	NA	NA	5.184	214.743	NA	NA	NA	NA	NA	NA	NA	NA	NA	NA	NA	NA	NA	NA	5.184	254.015	NA	NA	NA	NA	NA	NA
					83	NA	NA	NA	NA	NA	NA	NA	NA	NA	NA	NA	NA	NA	NA	NA	NA	NA	NA	NA	NA	5.248	195.895	NA	NA	NA	NA	NA	NA	NA	NA	NA	NA	NA	NA	NA	NA	5.248	241.785	NA	NA	NA	NA	NA	NA
					84	NA	NA	NA	NA	NA	NA	NA	NA	NA	NA	NA	NA	NA	NA	NA	NA	NA	NA	NA	NA	5.312	201.77	NA	NA	NA	NA	NA	NA	NA	NA	NA	NA	NA	NA	NA	NA	5.312	255.315	NA	NA	NA	NA	NA	NA
					85	NA	NA	NA	NA	NA	NA	NA	NA	NA	NA	NA	NA	NA	NA	NA	NA	NA	NA	NA	NA	5.376	221.666	NA	NA	NA	NA	NA	NA	NA	NA	NA	NA	NA	NA	NA	NA	NA	NA	NA	NA	NA	NA	NA	NA
					86	NA	NA	NA	NA	NA	NA	NA	NA	NA	NA	NA	NA	NA	NA	NA	NA	NA	NA	NA	NA	5.44	225.285	NA	NA	NA	NA	NA	NA	NA	NA	NA	NA	NA	NA	NA	NA	NA	NA	NA	NA	NA	NA	NA	NA
					87	NA	NA	NA	NA	NA	NA	NA	NA	NA	NA	NA	NA	NA	NA	NA	NA	NA	NA	NA	NA	5.504	237.299	NA	NA	NA	NA	NA	NA	NA	NA	NA	NA	NA	NA	NA	NA	NA	NA	NA	NA	NA	NA	NA	NA
					88	NA	NA	NA	NA	NA	NA	NA	NA	NA	NA	NA	NA	NA	NA	NA	NA	NA	NA	NA	NA	5.568	250.242	NA	NA	NA	NA	NA	NA	NA	NA	NA	NA	NA	NA	NA	NA	NA	NA	NA	NA	NA	NA	NA	NA
					89	NA	NA	NA	NA	NA	NA	NA	NA	NA	NA	NA	NA	NA	NA	NA	NA	NA	NA	NA	NA	5.632	260.008	NA	NA	NA	NA	NA	NA	NA	NA	NA	NA	NA	NA	NA	NA	NA	NA	NA	NA	NA	NA	NA	NA
					90	NA	NA	NA	NA	NA	NA	NA	NA	NA	NA	NA	NA	NA	NA	NA	NA	NA	NA	NA	NA	5.696	236.861	NA	NA	NA	NA	NA	NA	NA	NA	NA	NA	NA	NA	NA	NA	NA	NA	NA	NA	NA	NA	NA	NA
					91	NA	NA	NA	NA	NA	NA	NA	NA	NA	NA	NA	NA	NA	NA	NA	NA	NA	NA	NA	NA	5.76	201.99	NA	NA	NA	NA	NA	NA	NA	NA	NA	NA	NA	NA	NA	NA	NA	NA	NA	NA	NA	NA	NA	NA
					92	NA	NA	NA	NA	NA	NA	NA	NA	NA	NA	NA	NA	NA	NA	NA	NA	NA	NA	NA	NA	5.824	182.345	NA	NA	NA	NA	NA	NA	NA	NA	NA	NA	NA	NA	NA	NA	NA	NA	NA	NA	NA	NA	NA	NA
					93	NA	NA	NA	NA	NA	NA	NA	NA	NA	NA	NA	NA	NA	NA	NA	NA	NA	NA	NA	NA	5.888	180.988	NA	NA	NA	NA	NA	NA	NA	NA	NA	NA	NA	NA	NA	NA	NA	NA	NA	NA	NA	NA	NA	NA
					94	NA	NA	NA	NA	NA	NA	NA	NA	NA	NA	NA	NA	NA	NA	NA	NA	NA	NA	NA	NA	5.952	184.938	NA	NA	NA	NA	NA	NA	NA	NA	NA	NA	NA	NA	NA	NA	NA	NA	NA	NA	NA	NA	NA	NA
[truncated: 12 more columns]

## Sheet: Nup116_KR
Nup116-GFP						1								2								3								4								5								6
Nup60K467R						Ic				Ir		Ibg		Ic				Ir		Ibg		Ic				Ir		Ibg		Ic				Ir		Ibg		Ic				Ir		Ibg		Ic
							586.939				374.316		140.685		370.746				233.604		146.828		619.54				442.017		147.294		1120.38				351.579		140.073		628.237				440.38		154.378		641.213
							446.254								223.918								472.246								980.308								473.86								493.987
	average	median	SEM	n		Relative accumulation (RA)					233.63			Relative accumulation (RA)					86.7758			Relative accumulation (RA)					294.723			Relative accumulation (RA)					211.507			Relative accumulation (RA)					286.002			Relative accumulation (RA)
RA:	2.37133	2.09377	0.264004	19		1.91009								2.58042								1.60234								4.63488								1.65684								3.01049
	p-value
	2.50727e-05
						181128_VisSt_Nup116-GFP_TRNM92.4.1_01_06_Crop_1GFP_x_lc	181128_VisSt_Nup116-GFP_TRNM92.4.1_01_06_Crop_1GFP_y_lc	181128_VisSt_Nup116-GFP_TRNM92.4.1_01_06_Crop_1mCh_x_cap	181128_VisSt_Nup116-GFP_TRNM92.4.1_01_06_Crop_1mCh_y_cap	181128_VisSt_Nup116-GFP_TRNM92.4.1_01_06_Crop_1GFP_x_lr	181128_VisSt_Nup116-GFP_TRNM92.4.1_01_06_Crop_1GFP_y_lr	181128_VisSt_Nup116-GFP_TRNM92.4.1_01_06_Crop_1GFP_x_bg	181128_VisSt_Nup116-GFP_TRNM92.4.1_01_06_Crop_1GFP_y_bg	181128_VisSt_Nup116-GFP_TRNM92.4.1_01_07_Crop_1GFP_x_lc	181128_VisSt_Nup116-GFP_TRNM92.4.1_01_07_Crop_1GFP_y_lc	181128_VisSt_Nup116-GFP_TRNM92.4.1_01_07_Crop_1mCh_x_cap	181128_VisSt_Nup116-GFP_TRNM92.4.1_01_07_Crop_1mCh_y_cap	181128_VisSt_Nup116-GFP_TRNM92.4.1_01_07_Crop_1GFP_x_lr	181128_VisSt_Nup116-GFP_TRNM92.4.1_01_07_Crop_1GFP_y_lr	181128_VisSt_Nup116-GFP_TRNM92.4.1_01_07_Crop_1GFP_x_bg	181128_VisSt_Nup116-GFP_TRNM92.4.1_01_07_Crop_1GFP_y_bg	181128_VisSt_Nup116-GFP_TRNM92.4.1_01_10_Crop_1GFP_x_lc	181128_VisSt_Nup116-GFP_TRNM92.4.1_01_10_Crop_1GFP_y_lc	181128_VisSt_Nup116-GFP_TRNM92.4.1_01_10_Crop_1mCh_x_cap	181128_VisSt_Nup116-GFP_TRNM92.4.1_01_10_Crop_1mCh_y_cap	181128_VisSt_Nup116-GFP_TRNM92.4.1_01_10_Crop_1GFP_x_lr	181128_VisSt_Nup116-GFP_TRNM92.4.1_01_10_Crop_1GFP_y_lr	181128_VisSt_Nup116-GFP_TRNM92.4.1_01_10_Crop_1GFP_x_bg	181128_VisSt_Nup116-GFP_TRNM92.4.1_01_10_Crop_1GFP_y_bg	181128_VisSt_Nup116-GFP_TRNM92.4.1_01_10_Crop_2GFP_x_lc	181128_VisSt_Nup116-GFP_TRNM92.4.1_01_10_Crop_2GFP_y_lc	181128_VisSt_Nup116-GFP_TRNM92.4.1_01_10_Crop_2mCh_x_cap	181128_VisSt_Nup116-GFP_TRNM92.4.1_01_10_Crop_2mCh_y_cap	181128_VisSt_Nup116-GFP_TRNM92.4.1_01_10_Crop_2GFP_x_lr	181128_VisSt_Nup116-GFP_TRNM92.4.1_01_10_Crop_2GFP_y_lr	181128_VisSt_Nup116-GFP_TRNM92.4.1_01_10_Crop_2GFP_x_bg	181128_VisSt_Nup116-GFP_TRNM92.4.1_01_10_Crop_2GFP_y_bg	181128_VisSt_Nup116-GFP_TRNM92.4.1_01_10_Crop_3GFP_x_lc	181128_VisSt_Nup116-GFP_TRNM92.4.1_01_10_Crop_3GFP_y_lc	181128_VisSt_Nup116-GFP_TRNM92.4.1_01_10_Crop_3mCh_x_cap	181128_VisSt_Nup116-GFP_TRNM92.4.1_01_10_Crop_3mCh_y_cap	181128_VisSt_Nup116-GFP_TRNM92.4.1_01_10_Crop_3GFP_x_lr	181128_VisSt_Nup116-GFP_TRNM92.4.1_01_10_Crop_3GFP_y_lr	181128_VisSt_Nup116-GFP_TRNM92.4.1_01_10_Crop_3GFP_x_bg	181128_VisSt_Nup116-GFP_TRNM92.4.1_01_10_Crop_3GFP_y_bg	181128_VisSt_Nup116-GFP_TRNM92.4.1_01_10_Crop_4GFP_x_lc	181128_VisSt_Nup116-GFP_TRNM92.4.1_01_10_Crop_4GFP_y_lc	181128_VisSt_Nup116-GFP_TRNM92.4.1_01_10_Crop_4mCh_x_cap	181128_VisSt_Nup116-GFP_TRNM92.4.1_01_10_Crop_4mCh_y_cap
					1	0	464	0	80	0	1109	0	119	0	182	0	109	0	287	0	148	0	171	0	67	0	198	0	154	0	885	0	118	0	252	0	160	0	586	0	123	0	1023	0	160	0	607	0	247
					2	0.064	489.046	0.064	90.388	0.064	950.492	0.064	129.043	0.064	231.615	0.064	117.066	0.064	266.374	0.064	159.055	0.064	242.643	0.064	70.884	0.064	185.62	0.064	163.79	0.064	1024.56	0.064	116.833	0.064	218.796	0.064	148.793	0.064	722.528	0.064	168.497	0.064	802.503	0.064	150.863	0.064	669.92	0.064	214.505
					3	0.128	485.794	0.128	109.602	0.128	642.297	0.128	141.733	0.128	303.502	0.128	134.045	0.128	265.681	0.128	157.069	0.128	401.996	0.128	90.367	0.128	189.161	0.128	171.529	0.128	1236.96	0.128	111.104	0.128	195.585	0.128	140.559	0.128	849.789	0.128	242.831	0.128	632.491	0.128	152.355	0.128	674.127	0.128	173.448
					4	0.192	432.428	0.192	154.784	0.192	380.864	0.192	139.475	0.192	362.156	0.192	173.854	0.192	283.332	0.192	153.263	0.192	621.605	0.192	126.277	0.192	200.705	0.192	168.52	0.192	1457.25	0.192	95.169	0.192	175.585	0.192	136.004	0.192	855.694	0.192	325.063	0.192	545.566	0.192	149.149	0.192	590.853	0.192	131.085
					5	0.256	352.967	0.256	242.556	0.256	319.54	0.256	137.038	0.256	417.155	0.256	238.482	0.256	303.992	0.256	155.846	0.256	814.702	0.256	182.908	0.256	224.857	0.256	147.814	0.256	1520.7	0.256	98.107	0.256	172.374	0.256	152.672	0.256	854.424	0.256	420.041	0.256	483.013	0.256	140.022	0.256	550.521	0.256	87.744
					6	0.32	318.435	0.32	372.272	0.32	384.933	0.32	138.736	0.32	475.029	0.32	371.47	0.32	301.567	0.32	158.933	0.32	909.206	0.32	287.756	0.32	270.103	0.32	128.281	0.32	1363.74	0.32	111.777	0.32	174.852	0.32	163.024	0.32	817.934	0.32	530.041	0.32	405.787	0.32	137.722	0.32	568.403	0.32	60.736
					7	0.384	355.155	0.384	569.078	0.384	482.026	0.384	143.508	0.384	487.268	0.384	489.621	0.384	296.081	0.384	147.576	0.384	906.847	0.384	509.741	0.384	284.018	0.384	121.06	0.384	1182.2	0.384	117.256	0.384	218.413	0.384	159.961	0.384	700.769	0.384	647.467	0.384	406.374	0.384	146.182	0.384	636.831	0.384	38.943
					8	0.448	492.621	0.448	760.843	0.448	454.501	0.448	153.068	0.448	478.543	0.448	512.817	0.448	298.672	0.448	133.322	0.448	860.187	0.448	853.036	0.448	278.84	0.448	121.816	0.448	1112.12	0.448	130.5	0.448	313.467	0.448	152.86	0.448	653.312	0.448	732.113	0.448	432.794	0.448	155.457	0.448	639.448	0.448	39.683
					9	0.512	731.554	0.512	824.799	0.512	326.301	0.512	148	0.512	510.705	0.512	488.391	0.512	298.491	0.512	129.056	0.512	858.61	0.512	1261.38	0.512	255.554	0.512	134.344	0.512	1177.95	0.512	139.999	0.512	448.323	0.512	162.122	0.512	589.505	0.512	775.057	0.512	442.827	0.512	142.213	0.512	588.977	0.512	40.283
					10	0.576	947.933	0.576	636.282	0.576	237.326	0.576	141.544	0.576	520.286	0.576	483.576	0.576	312.877	0.576	130.248	0.576	918.648	0.576	1608.18	0.576	228.7	0.576	147.9	0.576	1219.92	0.576	131.283	0.576	568.091	0.576	165.188	0.576	473.274	0.576	825.356	0.576	359.397	0.576	123.002	0.576	530.052	0.576	43.141
					11	0.64	1100.64	0.64	415.62	0.64	241.244	0.64	131.138	0.64	518.335	0.64	424.26	0.64	309.011	0.64	136.259	0.64	1017.08	0.64	1735.82	0.64	217.83	0.64	140.858	0.64	1112.35	0.64	144.013	0.64	556.759	0.64	162.431	0.64	422.914	0.64	835.497	0.64	287.712	0.64	132.369	0.64	497.668	0.64	41.328
					12	0.704	1137.56	0.704	242.4	0.704	306.97	0.704	132.564	0.704	468.231	0.704	318.522	0.704	303.655	0.704	149.284	0.704	1071.09	0.704	1814.76	0.704	235.256	0.704	142.037	0.704	1095.87	0.704	161.093	0.704	504.813	0.704	156.451	0.704	404.963	0.704	795.447	0.704	255.433	0.704	153.71	0.704	543.778	0.704	36.484
					13	0.768	1086.01	0.768	144.865	0.768	373.971	0.768	140.024	0.768	384.311	0.768	221.034	0.768	319.492	0.768	149.827	0.768	1014.18	0.768	1885.02	0.768	266.162	0.768	151.63	0.768	1134.12	0.768	171.735	0.768	449.577	0.768	152.254	0.768	420.113	0.768	739.019	0.768	269.614	0.768	152.579	0.768	620.579	0.768	27.848
					14	0.832	856.226	0.832	115.613	0.832	367.181	0.832	146.268	0.832	293.155	0.832	153.834	0.832	318.343	0.832	149.894	0.832	960.33	0.832	1918.78	0.832	361.83	0.832	153.761	0.832	1116.68	0.832	175.26	0.832	400.187	0.832	153.98	0.832	384.008	0.832	663.808	0.832	292.968	0.832	156.392	0.832	654.569	0.832	20.495
					15	0.896	591.939	0.896	115.427	0.896	310.566	0.896	148.357	0.896	248.017	0.896	108.647	0.896	291.005	0.896	149.357	0.896	837.261	0.896	1907.11	0.896	513.857	0.896	154.434	0.896	1035.1	0.896	180.263	0.896	358.082	0.896	145.541	0.896	375.148	0.896	602.046	0.896	315.235	0.896	174.834	0.896	602.77	0.896	14.825
					16	0.96	424.481	0.96	112.493	0.96	263.502	0.96	146.099	0.96	253.786	0.96	98.058	0.96	266.918	0.96	152.781	0.96	738.864	0.96	1835.15	0.96	713.679	0.96	156.225	0.96	967.563	0.96	201.133	0.96	351.118	0.96	136.748	0.96	401.095	0.96	588.057	0.96	307.603	0.96	161.28	0.96	581.309	0.96	9.883
					17	1.024	332.473	1.024	102.815	1.024	234.513	1.024	144.317	1.024	269.967	1.024	99.114	1.024	253.582	1.024	154.504	1.024	723.668	1.024	1715.09	1.024	603.76	1.024	148.259	1.024	958.133	1.024	216.364	1.024	387.649	1.024	135.346	1.024	481.856	1.024	596.608	1.024	290.572	1.024	135.971	1.024	656.431	1.024	11.253
					18	1.088	311.758	1.088	95.427	1.088	219.278	1.088	140.193	1.088	269.371	1.088	99.119	1.088	266.528	1.088	148.006	1.088	751.656	1.088	1522.88	1.088	494.185	1.088	139.343	1.088	1031.26	1.088	212.882	1.088	435.718	1.088	139.828	1.088	632.583	1.088	650.9	1.088	277.247	1.088	130.766	1.088	845.495	1.088	20.315
					19	1.152	355.768	1.152	96.544	1.152	211.892	1.152	136.294	NA	NA	NA	NA	1.152	290.966	1.152	145.607	1.152	833.5	1.152	1293.17	1.152	412.689	1.152	141.43	1.152	1173.12	1.152	204.262	1.152	434.985	1.152	135.089	1.152	723.871	1.152	656.263	1.152	262.212	1.152	145.616	1.152	1037.28	1.152	34.598
					20	1.216	433.615	1.216	109.161	1.216	217.094	1.216	140.6	NA	NA	NA	NA	1.216	288.702	1.216	142.538	1.216	833.814	1.216	1088.24	1.216	319.997	1.216	140.545	1.216	1320.08	1.216	184.91	1.216	478.49	1.216	130.87	1.216	678.149	1.216	587.829	1.216	239.922	1.216	157.436	1.216	1215.4	1.216	50.877
					21	1.28	508.086	1.28	113.142	1.28	234.861	1.28	144.071	NA	NA	NA	NA	1.28	261.03	1.28	141.512	1.28	724.454	1.28	859.008	1.28	264.87	1.28	145.116	1.28	1365.06	1.28	162.34	1.28	505.416	1.28	135.461	1.28	689.75	1.28	511.128	1.28	219.358	1.28	156.727	1.28	1358.62	1.28	64.549
					22	1.344	565.311	1.344	107.092	1.344	283.26	1.344	148.058	NA	NA	NA	NA	1.344	230.486	1.344	140.03	1.344	577.728	1.344	605.246	1.344	261.36	1.344	153.107	1.344	1464.19	1.344	166.337	1.344	467.263	1.344	132.028	1.344	788.86	1.344	397.109	1.344	214.142	1.344	143.672	1.344	1380.29	1.344	67.434
					23	1.408	637.281	1.408	99.562	1.408	332.772	1.408	147.477	NA	NA	NA	NA	1.408	195.701	1.408	136.978	1.408	511.409	1.408	402.854	1.408	276.54	1.408	153.544	1.408	1497.63	1.408	168.924	1.408	407.425	1.408	122.12	1.408	931.06	1.408	272.21	1.408	222.69	1.408	158.001	1.408	1110.08	1.408	92.152
					24	1.472	675.459	1.472	96.226	1.472	309.943	1.472	137.623	NA	NA	NA	NA	1.472	179.944	1.472	128.569	1.472	500.408	1.472	266.565	1.472	308.85	1.472	141.729	1.472	1260.25	1.472	170.177	1.472	383.703	1.472	113.085	1.472	987.548	1.472	196.417	1.472	242.721	1.472	162.275	1.472	812.763	1.472	108.53
					25	NA	NA	NA	NA	1.536	257.622	1.536	137.34	NA	NA	NA	NA	1.536	168.193	1.536	124.947	1.536	471.542	1.536	167.437	1.536	377.745	1.536	140.989	1.536	1140.42	1.536	165.555	1.536	440.079	1.536	111.183	1.536	900.512	1.536	155.694	1.536	269.065	1.536	161.448	1.536	548.366	1.536	108.501
					26	NA	NA	NA	NA	1.6	239.467	1.6	144.671	NA	NA	NA	NA	1.6	157.84	1.6	130.42	1.6	430.002	1.6	119.16	1.6	561.193	1.6	139.652	1.6	1013.06	1.6	157.789	1.6	478.178	1.6	123.746	1.6	752.439	NA	NA	1.6	301.346	1.6	164.021	1.6	475.879	1.6	109.034
					27	NA	NA	NA	NA	1.664	263.863	1.664	145.277	NA	NA	NA	NA	1.664	158.196	1.664	141.513	1.664	359.134	1.664	96.767	1.664	873.463	1.664	132.713	1.664	983.985	1.664	147.694	1.664	462.853	1.664	134.885	1.664	664.092	NA	NA	1.664	377.872	1.664	157.536	1.664	511.87	1.664	85.754
					28	NA	NA	NA	NA	1.728	307.56	1.728	137.487	NA	NA	NA	NA	1.728	166.087	1.728	149.668	1.728	300.771	1.728	89.082	1.728	1176.37	1.728	141.514	1.728	1175.64	1.728	160.949	1.728	388.136	1.728	131.677	1.728	575.435	NA	NA	1.728	461.997	1.728	161.185	1.728	616.301	1.728	53.894
					29	NA	NA	NA	NA	1.792	341.969	1.792	128.658	NA	NA	NA	NA	1.792	176.876	1.792	150.74	1.792	289.512	1.792	114.975	1.792	1167.06	1.792	140.978	1.792	1292.73	1.792	170.369	1.792	313.316	1.792	131.476	1.792	551.409	NA	NA	1.792	548.6	1.792	173.765	1.792	680.231	1.792	41.831
					30	NA	NA	NA	NA	1.856	349.848	1.856	132.966	NA	NA	NA	NA	1.856	193.065	1.856	151.062	1.856	301.6	1.856	108.688	1.856	948.622	1.856	139.774	1.856	1440.52	1.856	185.707	1.856	256.648	1.856	135.382	1.856	526.606	NA	NA	1.856	592.621	1.856	160.265	1.856	611.86	1.856	35.811
					31	NA	NA	NA	NA	1.92	336.938	1.92	142.999	NA	NA	NA	NA	1.92	200.9	1.92	156.55	1.92	333.304	1.92	112.651	1.92	705.286	1.92	143.587	1.92	1657.32	1.92	191.135	1.92	255.426	1.92	136.023	1.92	498.975	NA	NA	1.92	540.05	1.92	158.52	1.92	523.6	1.92	35.46
					32	NA	NA	NA	NA	1.984	312.825	1.984	146.489	NA	NA	NA	NA	1.984	212.165	1.984	156.109	1.984	396.697	1.984	107.2	1.984	491.543	1.984	146.918	1.984	1738.4	1.984	162.116	1.984	280.099	1.984	128.602	1.984	511.169	NA	NA	1.984	501.189	1.984	155.091	1.984	551.02	1.984	56.16
					33	NA	NA	NA	NA	2.048	313.953	2.048	147.155	NA	NA	NA	NA	2.048	263.174	2.048	168.254	2.048	455.904	2.048	108.471	2.048	363.632	2.048	147.049	2.048	1554.92	2.048	136.601	2.048	308.085	2.048	122.036	2.048	566.261	NA	NA	2.048	464.846	2.048	157.759	2.048	539.06	2.048	84.58
					34	NA	NA	NA	NA	2.112	368.248	2.112	153.404	NA	NA	NA	NA	2.112	334.144	2.112	166.057	2.112	507.063	2.112	112.371	2.112	332.726	2.112	152.371	2.112	1210.49	2.112	126.72	2.112	325.405	2.112	123.753	2.112	632.59	NA	NA	2.112	413.802	2.112	170.631	2.112	471.54	2.112	121.92
					35	NA	NA	NA	NA	2.176	429.159	2.176	170.298	NA	NA	NA	NA	2.176	387.777	2.176	153.548	2.176	732.745	2.176	107.265	2.176	310.398	2.176	156.118	2.176	832.029	2.176	121.292	2.176	318.648	2.176	125.436	2.176	818.178	NA	NA	2.176	387.097	2.176	166.517	2.176	360.7	2.176	157.2
					36	NA	NA	NA	NA	2.24	450.23	2.24	156.908	NA	NA	NA	NA	2.24	405.372	2.24	141.445	2.24	719.22	2.24	112.722	2.24	285.525	2.24	152.162	2.24	695.328	2.24	123.01	2.24	303.866	2.24	131.609	2.24	817.297	NA	NA	2.24	374.927	2.24	151.488	2.24	290.52	2.24	183.8
					37	NA	NA	NA	NA	2.304	436.616	2.304	142.107	NA	NA	NA	NA	2.304	344.454	2.304	140.663	2.304	721.232	2.304	117.12	2.304	289.588	2.304	149.596	2.304	649.994	2.304	114.74	2.304	283.068	2.304	144.623	2.304	744.558	NA	NA	2.304	427.01	2.304	158.524	2.304	281.78	2.304	191.22
					38	NA	NA	NA	NA	2.368	430.849	2.368	137.57	NA	NA	NA	NA	2.368	272.833	2.368	155.176	2.368	789.934	2.368	123.366	2.368	302.397	2.368	151.547	2.368	680.216	2.368	96.467	2.368	294.267	2.368	147.114	2.368	702.209	NA	NA	2.368	551.445	2.368	173.933	2.368	292.32	2.368	171.84
					39	NA	NA	NA	NA	2.432	431.164	2.432	134.649	NA	NA	NA	NA	2.432	216.019	2.432	155.584	2.432	671.919	2.432	147.113	2.432	307.337	2.432	164.554	2.432	721.279	2.432	97.3	2.432	284.582	2.432	142.608	2.432	675.249	NA	NA	2.432	600.968	2.432	170.885	2.432	279.1	2.432	143.42
					40	NA	NA	NA	NA	2.496	414.903	2.496	134.008	NA	NA	NA	NA	2.496	176.312	2.496	145.453	2.496	449.925	2.496	154.869	2.496	298.68	2.496	166.406	2.496	742.959	2.496	102.321	2.496	253.091	2.496	138.816	2.496	688.861	NA	NA	2.496	551.098	2.496	168.441	NA	NA	NA	NA
					41	NA	NA	NA	NA	2.56	381.681	2.56	134.137	NA	NA	NA	NA	2.56	154.131	2.56	135.257	2.56	339.991	2.56	181.309	2.56	281.5	2.56	164.523	2.56	705.254	2.56	110.739	2.56	232.404	2.56	148.935	2.56	672.872	NA	NA	2.56	482.422	2.56	182.291	NA	NA	NA	NA
					42	NA	NA	NA	NA	2.624	397.802	2.624	136.362	NA	NA	NA	NA	2.624	146.836	NA	NA	2.624	282.086	2.624	204.097	2.624	264.06	2.624	156.429	2.624	643.37	2.624	118.773	2.624	223.114	2.624	155.091	2.624	529.971	NA	NA	2.624	433.575	2.624	159.421	NA	NA	NA	NA
					43	NA	NA	NA	NA	2.688	438.907	2.688	134.209	NA	NA	NA	NA	2.688	168.574	NA	NA	2.688	325.165	2.688	195.09	2.688	262.78	2.688	159.4	2.688	586.623	2.688	122.003	2.688	228.015	2.688	156.736	2.688	400.026	NA	NA	2.688	422.13	2.688	161.205	NA	NA	NA	NA
					44	NA	NA	NA	NA	2.752	446.449	2.752	130.637	NA	NA	NA	NA	2.752	205.486	NA	NA	2.752	440.067	2.752	200.212	2.752	273.56	2.752	154.4	NA	NA	NA	NA	2.752	245.918	2.752	157.05	2.752	324.999	NA	NA	2.752	409.38	2.752	161.367	NA	NA	NA	NA
					45	NA	NA	NA	NA	2.816	432.42	2.816	129.285	NA	NA	NA	NA	2.816	237.545	NA	NA	2.816	550.489	2.816	175.93	2.816	293.5	2.816	143	NA	NA	NA	NA	2.816	264.754	2.816	150.111	2.816	268.116	NA	NA	2.816	400.694	2.816	165.76	NA	NA	NA	NA
					46	NA	NA	NA	NA	2.88	397.892	NA	NA	NA	NA	NA	NA	2.88	249.621	NA	NA	2.88	670.712	2.88	156.937	2.88	336.32	2.88	136.8	NA	NA	NA	NA	2.88	271.132	2.88	135.707	2.88	292.216	NA	NA	2.88	422.727	2.88	162.216	NA	NA	NA	NA
					47	NA	NA	NA	NA	2.944	374.203	NA	NA	NA	NA	NA	NA	2.944	233.399	NA	NA	2.944	663.667	2.944	141.616	2.944	399.139	2.944	127.8	NA	NA	NA	NA	2.944	271.814	2.944	137.907	2.944	401.953	NA	NA	2.944	441.222	2.944	152.688	NA	NA	NA	NA
					48	NA	NA	NA	NA	3.008	370.838	NA	NA	NA	NA	NA	NA	3.008	201.413	NA	NA	3.008	661.25	3.008	142.893	3.008	445.46	3.008	129.6	NA	NA	NA	NA	3.008	275.841	3.008	136.388	3.008	519.079	NA	NA	3.008	459.785	3.008	150.108	NA	NA	NA	NA
					49	NA	NA	NA	NA	3.072	366.149	NA	NA	NA	NA	NA	NA	3.072	177.113	NA	NA	3.072	667.983	3.072	151.433	3.072	501.749	3.072	144.6	NA	NA	NA	NA	3.072	277.334	3.072	132.955	3.072	652.17	NA	NA	3.072	460.434	3.072	146.202	NA	NA	NA	NA
					50	NA	NA	NA	NA	3.136	374.303	NA	NA	NA	NA	NA	NA	3.136	184.088	NA	NA	3.136	641.736	3.136	149.605	3.136	559.41	3.136	163.2	NA	NA	NA	NA	3.136	263.136	3.136	140.89	3.136	712.019	NA	NA	3.136	468.681	3.136	131.589	NA	NA	NA	NA
					51	NA	NA	NA	NA	3.2	389.458	NA	NA	NA	NA	NA	NA	3.2	176.774	NA	NA	3.2	643.815	3.2	135.51	3.2	604.475	3.2	162.8	NA	NA	NA	NA	3.2	238.489	3.2	145.206	3.2	697.752	NA	NA	3.2	554.511	3.2	139.273	NA	NA	NA	NA
					52	NA	NA	NA	NA	3.264	367.556	NA	NA	NA	NA	NA	NA	3.264	168.425	NA	NA	3.264	667.297	3.264	117.468	3.264	700.302	3.264	157	NA	NA	NA	NA	3.264	236.333	3.264	135.79	3.264	683.332	NA	NA	3.264	596.899	3.264	148.913	NA	NA	NA	NA
					53	NA	NA	NA	NA	3.328	341.746	NA	NA	NA	NA	NA	NA	3.328	166.594	NA	NA	3.328	628.021	3.328	93.13	3.328	786.081	3.328	152.2	NA	NA	NA	NA	3.328	258.344	3.328	136.131	3.328	666.305	NA	NA	3.328	586.447	3.328	164.321	NA	NA	NA	NA
					54	NA	NA	NA	NA	3.392	333.202	NA	NA	NA	NA	NA	NA	3.392	164.335	NA	NA	3.392	541.502	3.392	72.097	3.392	766.057	3.392	150.8	NA	NA	NA	NA	3.392	284.848	3.392	141.775	3.392	659.356	NA	NA	3.392	524.551	3.392	173.683	NA	NA	NA	NA
					55	NA	NA	NA	NA	3.456	337.521	NA	NA	NA	NA	NA	NA	3.456	153.499	NA	NA	NA	NA	NA	NA	3.456	704.956	3.456	158	NA	NA	NA	NA	3.456	297.97	3.456	145.429	3.456	728.419	NA	NA	3.456	430.696	3.456	166.109	NA	NA	NA	NA
					56	NA	NA	NA	NA	3.52	343.068	NA	NA	NA	NA	NA	NA	3.52	143.905	NA	NA	NA	NA	NA	NA	3.52	711.903	3.52	158.2	NA	NA	NA	NA	3.52	323.399	3.52	136.211	3.52	809.878	NA	NA	3.52	358.701	3.52	138.768	NA	NA	NA	NA
					57	NA	NA	NA	NA	3.584	352.488	NA	NA	NA	NA	NA	NA	3.584	147.963	NA	NA	NA	NA	NA	NA	3.584	698.406	3.584	158.4	NA	NA	NA	NA	3.584	656.567	3.584	126.644	3.584	749.146	NA	NA	3.584	319.835	3.584	125.239	NA	NA	NA	NA
					58	NA	NA	NA	NA	3.648	362.231	NA	NA	NA	NA	NA	NA	3.648	168	NA	NA	NA	NA	NA	NA	3.648	685.904	3.648	137.02	NA	NA	NA	NA	3.648	647.289	3.648	122.01	3.648	619.156	NA	NA	3.648	310.396	3.648	126.977	NA	NA	NA	NA
					59	NA	NA	NA	NA	3.712	369.102	NA	NA	NA	NA	NA	NA	3.712	205.152	NA	NA	NA	NA	NA	NA	3.712	693.703	3.712	128.15	NA	NA	NA	NA	3.712	614.895	3.712	121.711	NA	NA	NA	NA	3.712	280.143	3.712	139.553	NA	NA	NA	NA
					60	NA	NA	NA	NA	3.776	377.903	NA	NA	NA	NA	NA	NA	3.776	236.435	NA	NA	NA	NA	NA	NA	3.776	642.164	3.776	133.41	NA	NA	NA	NA	3.776	613.3	3.776	129.282	NA	NA	NA	NA	3.776	280.071	3.776	150.764	NA	NA	NA	NA
					61	NA	NA	NA	NA	3.84	398.791	NA	NA	NA	NA	NA	NA	3.84	242.454	NA	NA	NA	NA	NA	NA	3.84	612.201	3.84	144.7	NA	NA	NA	NA	3.84	593.88	3.84	130.101	NA	NA	NA	NA	3.84	366.503	3.84	149.144	NA	NA	NA	NA
					62	NA	NA	NA	NA	NA	NA	NA	NA	NA	NA	NA	NA	3.904	248.757	NA	NA	NA	NA	NA	NA	3.904	545.527	3.904	151.28	NA	NA	NA	NA	3.904	515.02	3.904	133.575	NA	NA	NA	NA	3.904	570.896	3.904	141.041	NA	NA	NA	NA
					63	NA	NA	NA	NA	NA	NA	NA	NA	NA	NA	NA	NA	3.968	276.484	NA	NA	NA	NA	NA	NA	3.968	433.712	3.968	154.71	NA	NA	NA	NA	3.968	390.9	3.968	135.403	NA	NA	NA	NA	3.968	762.754	3.968	157.081	NA	NA	NA	NA
					64	NA	NA	NA	NA	NA	NA	NA	NA	NA	NA	NA	NA	4.032	288.14	NA	NA	NA	NA	NA	NA	4.032	341.226	4.032	150.87	NA	NA	NA	NA	4.032	292.2	4.032	133.844	NA	NA	NA	NA	4.032	743.651	4.032	161.373	NA	NA	NA	NA
					65	NA	NA	NA	NA	NA	NA	NA	NA	NA	NA	NA	NA	4.096	266.538	NA	NA	NA	NA	NA	NA	4.096	287.192	4.096	139.59	NA	NA	NA	NA	4.096	231.34	4.096	137.99	NA	NA	NA	NA	4.096	717.058	4.096	169.192	NA	NA	NA	NA
					66	NA	NA	NA	NA	NA	NA	NA	NA	NA	NA	NA	NA	4.16	237.935	NA	NA	NA	NA	NA	NA	4.16	271.118	4.16	134	NA	NA	NA	NA	NA	NA	4.16	138.413	NA	NA	NA	NA	4.16	665.782	4.16	172.614	NA	NA	NA	NA
					67	NA	NA	NA	NA	NA	NA	NA	NA	NA	NA	NA	NA	4.224	235.21	NA	NA	NA	NA	NA	NA	4.224	287.067	4.224	136.85	NA	NA	NA	NA	NA	NA	4.224	138.319	NA	NA	NA	NA	NA	NA	4.224	173.276	NA	NA	NA	NA
					68	NA	NA	NA	NA	NA	NA	NA	NA	NA	NA	NA	NA	4.288	253.281	NA	NA	NA	NA	NA	NA	4.288	309.713	4.288	141.28	NA	NA	NA	NA	NA	NA	4.288	143.108	NA	NA	NA	NA	NA	NA	4.288	161.681	NA	NA	NA	NA
					69	NA	NA	NA	NA	NA	NA	NA	NA	NA	NA	NA	NA	4.352	265.037	NA	NA	NA	NA	NA	NA	NA	NA	NA	NA	NA	NA	NA	NA	NA	NA	4.352	139.38	NA	NA	NA	NA	NA	NA	4.352	145.078	NA	NA	NA	NA
					70	NA	NA	NA	NA	NA	NA	NA	NA	NA	NA	NA	NA	4.416	270.455	NA	NA	NA	NA	NA	NA	NA	NA	NA	NA	NA	NA	NA	NA	NA	NA	4.416	143.036	NA	NA	NA	NA	NA	NA	4.416	134.281	NA	NA	NA	NA
					71	NA	NA	NA	NA	NA	NA	NA	NA	NA	NA	NA	NA	4.48	275.399	NA	NA	NA	NA	NA	NA	NA	NA	NA	NA	NA	NA	NA	NA	NA	NA	4.48	147.923	NA	NA	NA	NA	NA	NA	4.48	126.501	NA	NA	NA	NA
					72	NA	NA	NA	NA	NA	NA	NA	NA	NA	NA	NA	NA	4.544	267.878	NA	NA	NA	NA	NA	NA	NA	NA	NA	NA	NA	NA	NA	NA	NA	NA	4.544	145.49	NA	NA	NA	NA	NA	NA	4.544	143.406	NA	NA	NA	NA
					73	NA	NA	NA	NA	NA	NA	NA	NA	NA	NA	NA	NA	4.608	265.473	NA	NA	NA	NA	NA	NA	NA	NA	NA	NA	NA	NA	NA	NA	NA	NA	4.608	145.202	NA	NA	NA	NA	NA	NA	4.608	162.396	NA	NA	NA	NA
					74	NA	NA	NA	NA	NA	NA	NA	NA	NA	NA	NA	NA	4.672	272.455	NA	NA	NA	NA	NA	NA	NA	NA	NA	NA	NA	NA	NA	NA	NA	NA	4.672	146.681	NA	NA	NA	NA	NA	NA	4.672	177.033	NA	NA	NA	NA
					75	NA	NA	NA	NA	NA	NA	NA	NA	NA	NA	NA	NA	4.736	281.677	NA	NA	NA	NA	NA	NA	NA	NA	NA	NA	NA	NA	NA	NA	NA	NA	4.736	146.998	NA	NA	NA	NA	NA	NA	4.736	173.654	NA	NA	NA	NA
					76	NA	NA	NA	NA	NA	NA	NA	NA	NA	NA	NA	NA	4.8	271.068	NA	NA	NA	NA	NA	NA	NA	NA	NA	NA	NA	NA	NA	NA	NA	NA	4.8	146.718	NA	NA	NA	NA	NA	NA	4.8	156.526	NA	NA	NA	NA
					77	NA	NA	NA	NA	NA	NA	NA	NA	NA	NA	NA	NA	4.864	249.59	NA	NA	NA	NA	NA	NA	NA	NA	NA	NA	NA	NA	NA	NA	NA	NA	NA	NA	NA	NA	NA	NA	NA	NA	4.864	153.242	NA	NA	NA	NA
					78	NA	NA	NA	NA	NA	NA	NA	NA	NA	NA	NA	NA	4.928	213.981	NA	NA	NA	NA	NA	NA	NA	NA	NA	NA	NA	NA	NA	NA	NA	NA	NA	NA	NA	NA	NA	NA	NA	NA	4.928	148.878	NA	NA	NA	NA
					79	NA	NA	NA	NA	NA	NA	NA	NA	NA	NA	NA	NA	4.992	195.576	NA	NA	NA	NA	NA	NA	NA	NA	NA	NA	NA	NA	NA	NA	NA	NA	NA	NA	NA	NA	NA	NA	NA	NA	NA	NA	NA	NA	NA	NA
					80	NA	NA	NA	NA	NA	NA	NA	NA	NA	NA	NA	NA	5.056	162.473	NA	NA	NA	NA	NA	NA	NA	NA	NA	NA	NA	NA	NA	NA	NA	NA	NA	NA	NA	NA	NA	NA	NA	NA	NA	NA	NA	NA	NA	NA
					81	NA	NA	NA	NA	NA	NA	NA	NA	NA	NA	NA	NA	5.12	143.541	NA	NA	NA	NA	NA	NA	NA	NA	NA	NA	NA	NA	NA	NA	NA	NA	NA	NA	NA	NA	NA	NA	NA	NA	NA	NA	NA	NA	NA	NA
					82	NA	NA	NA	NA	NA	NA	NA	NA	NA	NA	NA	NA	5.184	148.292	NA	NA	NA	NA	NA	NA	NA	NA	NA	NA	NA	NA	NA	NA	NA	NA	NA	NA	NA	NA	NA	NA	NA	NA	NA	NA	NA	NA	NA	NA
					83	NA	NA	NA	NA	NA	NA	NA	NA	NA	NA	NA	NA	5.248	154.995	NA	NA	NA	NA	NA	NA	NA	NA	NA	NA	NA	NA	NA	NA	NA	NA	NA	NA	NA	NA	NA	NA	NA	NA	NA	NA	NA	NA	NA	NA
					84	NA	NA	NA	NA	NA	NA	NA	NA	NA	NA	NA	NA	5.312	155.446	NA	NA	NA	NA	NA	NA	NA	NA	NA	NA	NA	NA	NA	NA	NA	NA	NA	NA	NA	NA	NA	NA	NA	NA	NA	NA	NA	NA	NA	NA
					85	NA	NA	NA	NA	NA	NA	NA	NA	NA	NA	NA	NA	5.376	184.359	NA	NA	NA	NA	NA	NA	NA	NA	NA	NA	NA	NA	NA	NA	NA	NA	NA	NA	NA	NA	NA	NA	NA	NA	NA	NA	NA	NA	NA	NA
					86	NA	NA	NA	NA	NA	NA	NA	NA	NA	NA	NA	NA	5.44	230.623	NA	NA	NA	NA	NA	NA	NA	NA	NA	NA	NA	NA	NA	NA	NA	NA	NA	NA	NA	NA	NA	NA	NA	NA	NA	NA	NA	NA	NA	NA
					87	NA	NA	NA	NA	NA	NA	NA	NA	NA	NA	NA	NA	5.504	265.744	NA	NA	NA	NA	NA	NA	NA	NA	NA	NA	NA	NA	NA	NA	NA	NA	NA	NA	NA	NA	NA	NA	NA	NA	NA	NA	NA	NA	NA	NA
					88	NA	NA	NA	NA	NA	NA	NA	NA	NA	NA	NA	NA	5.568	268.735	NA	NA	NA	NA	NA	NA	NA	NA	NA	NA	NA	NA	NA	NA	NA	NA	NA	NA	NA	NA	NA	NA	NA	NA	NA	NA	NA	NA	NA	NA
					89	NA	NA	NA	NA	NA	NA	NA	NA	NA	NA	NA	NA	5.632	239.802	NA	NA	NA	NA	NA	NA	NA	NA	NA	NA	NA	NA	NA	NA	NA	NA	NA	NA	NA	NA	NA	NA	NA	NA	NA	NA	NA	NA	NA	NA
					90	NA	NA	NA	NA	NA	NA	NA	NA	NA	NA	NA	NA	5.696	219.624	NA	NA	NA	NA	NA	NA	NA	NA	NA	NA	NA	NA	NA	NA	NA	NA	NA	NA	NA	NA	NA	NA	NA	NA	NA	NA	NA	NA	NA	NA
					91	NA	NA	NA	NA	NA	NA	NA	NA	NA	NA	NA	NA	5.76	198.945	NA	NA	NA	NA	NA	NA	NA	NA	NA	NA	NA	NA	NA	NA	NA	NA	NA	NA	NA	NA	NA	NA	NA	NA	NA	NA	NA	NA	NA	NA
					92	NA	NA	NA	NA	NA	NA	NA	NA	NA	NA	NA	NA	5.824	190.085	NA	NA	NA	NA	NA	NA	NA	NA	NA	NA	NA	NA	NA	NA	NA	NA	NA	NA	NA	NA	NA	NA	NA	NA	NA	NA	NA	NA	NA	NA
					93	NA	NA	NA	NA	NA	NA	NA	NA	NA	NA	NA	NA	5.888	195.338	NA	NA	NA	NA	NA	NA	NA	NA	NA	NA	NA	NA	NA	NA	NA	NA	NA	NA	NA	NA	NA	NA	NA	NA	NA	NA	NA	NA	NA	NA
					94	NA	NA	NA	NA	NA	NA	NA	NA	NA	NA	NA	NA	5.952	208.169	NA	NA	NA	NA	NA	NA	NA	NA	NA	NA	NA	NA	NA	NA	NA	NA	NA	NA	NA	NA	NA	NA	NA	NA	NA	NA	NA	NA	NA	NA
					95	NA	NA	NA	NA	NA	NA	NA	NA	NA	NA	NA	NA	6.016	198.551	NA	NA	NA	NA	NA	NA	NA	NA	NA	NA	NA	NA	NA	NA	NA	NA	NA	NA	NA	NA	NA	NA	NA	NA	NA	NA	NA	NA	NA	NA
					96	NA	NA	NA	NA	NA	NA	NA	NA	NA	NA	NA	NA	6.08	195.025	NA	NA	NA	NA	NA	NA	NA	NA	NA	NA	NA	NA	NA	NA	NA	NA	NA	NA	NA	NA	NA	NA	NA	NA	NA	NA	NA	NA	NA	NA
					97	NA	NA	NA	NA	NA	NA	NA	NA	NA	NA	NA	NA	6.144	207.256	NA	NA	NA	NA	NA	NA	NA	NA	NA	NA	NA	NA	NA	NA	NA	NA	NA	NA	NA	NA	NA	NA	NA	NA	NA	NA	NA	NA	NA	NA
					98	NA	NA	NA	NA	NA	NA	NA	NA	NA	NA	NA	NA	6.208	224.825	NA	NA	NA	NA	NA	NA	NA	NA	NA	NA	NA	NA	NA	NA	NA	NA	NA	NA	NA	NA	NA	NA	NA	NA	NA	NA	NA	NA	NA	NA
					99	NA	NA	NA	NA	NA	NA	NA	NA	NA	NA	NA	NA	6.272	244.273	NA	NA	NA	NA	NA	NA	NA	NA	NA	NA	NA	NA	NA	NA	NA	NA	NA	NA	NA	NA	NA	NA	NA	NA	NA	NA	NA	NA	NA	NA
					100	NA	NA	NA	NA	NA	NA	NA	NA	NA	NA	NA	NA	6.336	238.681	NA	NA	NA	NA	NA	NA	NA	NA	NA	NA	NA	NA	NA	NA	NA	NA	NA	NA	NA	NA	NA	NA	NA	NA	NA	NA	NA	NA	NA	NA
					101	NA	NA	NA	NA	NA	NA	NA	NA	NA	NA	NA	NA	6.4	229.715	NA	NA	NA	NA	NA	NA	NA	NA	NA	NA	NA	NA	NA	NA	NA	NA	NA	NA	NA	NA	NA	NA	NA	NA	NA	NA	NA	NA	NA	NA
[truncated: 108 more columns]
