# Supplementary material for: DNA circles promote yeast ageing in part through stimulating the reorganization of nuclear pore complexes
Source: eLife. 2022 Apr 4;11:e71196. doi: 10.7554/eLife.71196 (PMC9020822; doi:10.7554/eLife.71196)
Supplement: Figure 8—source data 1. [file elife-71196-fig8-data1.xlsx]

## Sheet: wt
Life span curve
wt
		Total count	83								Life span curve
		median	18
											Age		Count	Percentage	Half
	File	Cell	Age	Status	Strain	Leave		Age	Status	Strain	>0	0	83	100
	200219_LS_GC_run4_wt_Nam7_Lea1_Br_2_MMStack_Pos1.ome.tif	A3	22	d	wt						>1	1	83	100	50
		A4	34	d	wt						>2	2	83	100	50
		A5	13	d	wt						>3	3	83	100	50
		A6	11	d	wt						>4	4	83	100	50
		B1	24	d	wt						>5	5	83	100	50
		B2	15	d	wt						>6	6	83	100	50
		B3	6	d	wt						>7	7	82	98.7952	50
		B5	16	d	wt						>8	8	81	97.5904	50
		B6	21	d	wt						>9	9	78	93.9759	50
		C1	18	d	wt						>10	10	76	91.5663	50
		c2	12	d	wt						>11	11	74	89.1566	50
		c3	18	d	wt						>12	12	71	85.5422	50
		c4	9	d	wt						>13	13	67	80.7229	50
		d2	24	d	wt						>14	14	60	72.2892	50
		d1	12	d	wt						>15	15	57	68.6747	50
		d3	7	d	wt						>16	16	54	65.0602	50
		e1	13	d	wt						>17	17	49	59.0361	50
		g1	32	d	wt						>18	18	42	50.6024	50
		h1	18	d	wt						>19	19	36	43.3735	50
	200219_LS_GC_run4_wt_Nam7_Lea1_Br_2_MMStack_Pos4.ome.tif	b7	9	d	wt						>20	20	33	39.759	50
		b1	21	d	wt						>21	21	28	33.7349	50
		b2	18	d	wt						>22	22	21	25.3012	50
		b3	24	d	wt						>23	23	18	21.6867	50
		b4	21	d	wt						>24	24	16	19.2771	50
		b5	20	d	wt						>25	25	9	10.8434	50
		b6	21	d	wt						>26	26	8	9.63855	50
		a3	18	d	wt						>27	27	6	7.22892	50
		c1	23	d	wt						>28	28	4	4.81928	50
		c3	12	d	wt						>29	29	4	4.81928	50
		c5	13	d	wt						>30	30	3	3.61446	50
		d1	14	d	wt						>31	31	2	2.40964	50
		d2	11	d	wt						>32	32	2	2.40964	50
		d3	17	d	wt						>33	33	1	1.20482	50
		d4	27	d	wt						>34	34	1	1.20482	50
		e1	20	d	wt						>35	35	0	0	50
		f1	19	d	wt						>36	36	0	0	50
		g1	16	d	wt						>37	37	0	0	50
		h1	15	d	wt						>38	38	0	0	50
	200219_LS_GC_run4_wt_Nam7_Lea1_Br_2_MMStack_Pos7.ome.tif	a2	24	d	wt						>39	39	0	0	50
		a4	8	d	wt						>40	40	0	0	50
		a5	13	d	wt						>41	41	0	0	50
		a7	21	d	wt						>42	42	0	0	50
		b1	27	d	wt						>43	43	0	0	50
		b2	19	d	wt						>44	44	0	0	50
		b4	26	d	wt						>45	45	0	0	50
		b5	20	d	wt						>46	46	0	0	50
		c1	15	d	wt						>47	47	0	0	50
	200219_LS_GC_run4_wt_Nam7_Lea1_Br_2_MMStack_Pos6.ome.tif	i2	17	d	wt						>48	48	0	0	50
		h1	22	d	wt						>49	49	0	0	50
		g1	8	d	wt						>50	50	0	0	50
		f1	17	d	wt
		e1	13	d	wt
		f4	26	d	wt
	200219_LS_GC_run4_wt_Nam7_Lea1_Br_2_MMStack_Pos8.ome.tif	c3	19	d	wt
		c4	16	d	wt
		c5	24	d	wt
		c6	11	d	wt
		d1	29	d	wt
		i1	12	d	wt
		j2	24	d	wt
		j3	18	d	wt
		j7	16	d	wt
		d7	21	d	wt
		d6	10	d	wt
		e7	20	d	wt
		e6	21	d	wt
		e5	13	d	wt
		e3	17	d	wt
	200219_LS_GC_run4_wt_Nam7_Lea1_Br_2_MMStack_Pos9.ome.tif	a1	20	d	wt
		b6	17	d	wt
		b5	25	d	wt
		b4	14	d	wt
		c3	30	d	wt
		c1	16	d	wt
		c6	14	d	wt
		c7	17	d	wt
		d1	17	d	wt
		d2	8	d	wt
		d3	10	d	wt
		d5	13	d	wt
		d7	24	d	wt
		e3	23	d	wt
		e4	22	d	wt

## Sheet: Nup60del
Life span curve
Nup60Del
		Total count	103								Life span curve
		median	13
											Age		Count	Percentage	Half
	File	Cell	Age	Status	Strain	Leave		Age	Status	Strain	>0	0	103	100
	200930_R28_LS_Nup60_Ist3_Swt21_1_MMStack_Pos20.ome.tif	b1	14	d	Nup60						>1	1	88	85.4369	50
		c1	13	d	Nup60						>2	2	85	82.5243	50
		a2	12	d	Nup60						>3	3	84	81.5534	50
		b2	17	d	Nup60						>4	4	82	79.6117	50
		c2	13	d	Nup60						>5	5	81	78.6408	50
		d2	19	d	Nup60						>6	6	77	74.7573	50
		e2	14	d	Nup60						>7	7	74	71.8447	50
		f3	19	d	Nup60						>8	8	72	69.9029	50
		i3	5	d	Nup60						>9	9	68	66.0194	50
		b4	1	d	Nup60						>10	10	64	62.1359	50
		a4	7	d	Nup60						>11	11	63	61.165	50
		e4	9	d	Nup60						>12	12	58	56.3107	50
		f4	20	d	Nup60						>13	13	52	50.4854	50
		h4	17	d	Nup60						>14	14	44	42.7184	50
		i4	12	d	Nup60						>15	15	39	37.8641	50
		a5	21	d	Nup60						>16	16	36	34.9515	50
	200930_R28_LS_Nup60_Ist3_Swt21_1_MMStack_Pos23.ome.tif	d1	1	d	Nup60						>17	17	31	30.0971	50
		c1	28	d	Nup60						>18	18	24	23.301	50
		b2	8	d	Nup60						>19	19	23	22.3301	50
		c2	16	d	Nup60						>20	20	20	19.4175	50
		d2	16	d	Nup60						>21	21	17	16.5049	50
		g2	5	d	Nup60						>22	22	16	15.534	50
		i2	24	d	Nup60						>23	23	13	12.6214	50
		b3	15	d	Nup60						>24	24	11	10.6796	50
		c3	11	d	Nup60						>25	25	7	6.79612	50
		d3	9	d	Nup60						>26	26	7	6.79612	50
		f3	13	d	Nup60						>27	27	6	5.82524	50
		g3	27	d	Nup60						>28	28	4	3.8835	50
		b4	11	d	Nup60						>29	29	2	1.94175	50
		f4	12	d	Nup60						>30	30	1	0.970874	50
		g4	16	d	Nup60						>31	31	0	0	50
		h4	13	d	Nup60						>32	32	0	0	50
		i4	22	d	Nup60						>33	33	0	0	50
		b5	11	d	Nup60						>34	34	0	0	50
		c5	23	d	Nup60						>35	35	0	0	50
	200930_R28_LS_Nup60_Ist3_Swt21_1_MMStack_Pos24.ome.tif	b1	20	d	Nup60						>36	36	0	0	50
		c1	24	d	Nup60						>37	37	0	0	50
		b2	9	d	Nup60						>38	38	0	0	50
		c2	30	d	Nup60						>39	39	0	0	50
		d2	24	d	Nup60						>40	40	0	0	50
		c7	4	d	Nup60						>41	41	0	0	50
		g7	13	d	Nup60						>42	42	0	0	50
		h7	19	d	Nup60						>43	43	0	0	50
		b6	17	d	Nup60						>44	44	0	0	50
		d6	3	d	Nup60						>45	45	0	0	50
		f6	5	d	Nup60						>46	46	0	0	50
		h6	11	d	Nup60						>47	47	0	0	50
		i6	15	d	Nup60						>48	48	0	0	50
		j6	16	d	Nup60						>49	49	0	0	50
	201021_R29_LS_Nup60_Snu66_Swt21_1_MMStack_Pos14.ome.tif	f2	8	d	Nup60						>50	50	0	0	50
		c2	27	d	Nup60
		b2	22	d	Nup60
		a3	8	d	Nup60
		c3	6	d	Nup60
		d3	9	d	Nup60
		e3	13	d	Nup60
		f3	12	d	Nup60
		a4	29	d	Nup60
		d4	18	d	Nup60
		g4	14	d	Nup60
		a5	14	d	Nup60
		b5	28	d	Nup60
		c5	2	d	Nup60
		d5	24	d	Nup60
		e5	23	d	Nup60
		g5	22	d	Nup60
		c6	17	d	Nup60
		b7	10	d	Nup60
		d7	26	d	Nup60
		e7	5	d	Nup60
		b8	11	d	Nup60
		a8	13	d	Nup60
		d8	17	d	Nup60
		e8	16	d	Nup60
		e10	17	d	Nup60
		d9	8	d	Nup60
		d10	15	d	Nup60
	201021_R29_LS_Nup60_Snu66_Swt21_1_MMStack_Pos15.ome.tif	a2	1	d	Nup60
		b1	6	d	Nup60
		c1	13	d	Nup60
		b2	20	d	Nup60
		d2	12	d	Nup60
		c2	6	d	Nup60
		e2	7	d	Nup60
		a3	14	d	Nup60
		b6	12	d	Nup60
		e6	3	d	Nup60
		d7	17	d	Nup60
		e7	20	d	Nup60
		f7	13	d	Nup60
		g7	7	d	Nup60
		b8	16	d	Nup60
		b9	8	d	Nup60
		d8	12	d	Nup60
		g8	10	d	Nup60
		f8	11	d	Nup60
		e8	18	d	Nup60
		c9	6	d	Nup60
		d9	13	d	Nup60
		g9	22	d	Nup60
		c11	23	d	Nup60
		d11	24	d	Nup60
		h11	8	d	Nup60

## Sheet: Nup60KR
Life span curve
Nup60KR
		Total count	101								Life span curve
		median	20
											Age		Count	Percentage	Half
	File	Cell	Age	Status	Strain	Leave		Age	Status	Strain	>0	0	101	100
	200219_LS_GC_run4_wt_Nam7_Lea1_Br_2_MMStack_Pos36.ome.tif	B2	14	d	Nup60KR						>1	1	101	100	50
		B1	23	d	Nup60KR						>2	2	101	100	50
		B3	28	c	Nup60KR						>3	3	101	100	50
	200225_LS_GC_Run5_Intronless_N60KR_Br_1_MMStack_Pos40.ome.tif	A2	11	d	Nup60KR						>4	4	101	100	50
		A3	8	d	Nup60KR						>5	5	101	100	50
		A4	24	d	Nup60KR						>6	6	101	100	50
		B1	16	d	Nup60KR						>7	7	101	100	50
		B2	20	d	Nup60KR						>8	8	101	100	50
		B3	23	d	Nup60KR						>9	9	100	99.0099	50
		b4	22	d	Nup60KR						>10	10	100	99.0099	50
		b5	31	d	Nup60KR						>11	11	99	98.0198	50
		b7	19	d	Nup60KR						>12	12	96	95.0495	50
		c1	25	d	Nup60KR						>13	13	94	93.0693	50
		c2	11	d	Nup60KR						>14	14	89	88.1188	50
		c3	15	d	Nup60KR						>15	15	82	81.1881	50
		c4	13	d	Nup60KR						>16	16	76	75.2475	50
		d1	25	d	Nup60KR						>17	17	73	72.2772	50
		d2	19	d	Nup60KR						>18	18	68	67.3267	50
		d3	28	d	Nup60KR						>19	19	62	61.3861	50
		d4	30	d	Nup60KR						>20	20	53	52.4752	50
		d5	20	d	Nup60KR						>21	21	40	39.604	50
		e1	18	d	Nup60KR						>22	22	39	38.6139	50
		e2	15	d	Nup60KR						>23	23	33	32.6733	50
		f1	19	d	Nup60KR						>24	24	29	28.7129	50
		f2	18	d	Nup60KR						>25	25	22	21.7822	50
		b1	22	d	Nup60KR						>26	26	19	18.8119	50
	200225_LS_GC_Run5_Intronless_N60KR_Br_1_MMStack_Pos41.ome.tif	a1	18	d	Nup60KR						>27	27	14	13.8614	50
		a2	20	d	Nup60KR						>28	28	12	11.8812	50
		b2	17	d	Nup60KR						>29	29	10	9.90099	50
		b3	26	d	Nup60KR						>30	30	8	7.92079	50
		b4	15	d	Nup60KR						>31	31	7	6.93069	50
		b6	13	d	Nup60KR						>32	32	6	5.94059	50
		c3	14	d	Nup60KR						>33	33	6	5.94059	50
		d1	19	d	Nup60KR						>34	34	5	4.9505	50
		e1	14	d	Nup60KR						>35	35	2	1.9802	50
		f1	22	d	Nup60KR						>36	36	1	0.990099	50
		g1	20	d	Nup60KR						>37	37	1	0.990099	50
		g2	21	d	Nup60KR						>38	38	1	0.990099	50
		i1	10	d	Nup60KR						>39	39	0	0	50
		h1	29	d	Nup60KR						>40	40	0	0	50
		i2	15	d	Nup60KR						>41	41	0	0	50
		f2	29	d	Nup60KR						>42	42	0	0	50
		d2	18	d	Nup60KR						>43	43	0	0	50
		d3	20	d	Nup60KR						>44	44	0	0	50
		d4	16	d	Nup60KR						>45	45	0	0	50
		e7	17	d	Nup60KR						>46	46	0	0	50
	200225_LS_GC_Run5_Intronless_N60KR_Br_1_MMStack_Pos42.ome.tif	a2	35	d	Nup60KR						>47	47	0	0	50
		a3	34	d	Nup60KR						>48	48	0	0	50
		a4	19	d	Nup60KR						>49	49	0	0	50
		a5	27	d	Nup60KR						>50	50	0	0	50
		a7	13	d	Nup60KR
		b2	19	d	Nup60KR
		b3	22	d	Nup60KR
		b4	17	d	Nup60KR
		b5	18	d	Nup60KR
		b7	24	d	Nup60KR
		c1	20	d	Nup60KR
		c2	19	d	Nup60KR
		c3	33	d	Nup60KR
		c6	20	d	Nup60KR
		d3	13	d	Nup60KR
		d4	24	d	Nup60KR
		d5	17	d	Nup60KR
		e2	27	d	Nup60KR
		e3	24	d	Nup60KR
		e4	14	d	Nup60KR
		e5	20	d	Nup60KR
		e6	15	d	Nup60KR
		f2	34	d	Nup60KR
		f3	14	d	Nup60KR
		f4	12	d	Nup60KR
		f6	26	d	Nup60KR
		f7	20	d	Nup60KR
		g1	22	d	Nup60KR
		g2	23	d	Nup60KR
		g3	38	d	Nup60KR
		h1	19	d	Nup60KR
		h4	17	d	Nup60KR
		h5	24	d	Nup60KR
		h6	23	d	Nup60KR
		i2	24	d	Nup60KR
		i3	22	d	Nup60KR
	200225_LS_GC_Run5_Intronless_N60KR_Br_1_MMStack_Pos43.ome.tif	a1	26	d	Nup60KR
		b1	18	d	Nup60KR
		c1	14	d	Nup60KR
		d1	26	d	Nup60KR
		a2	20	d	Nup60KR
		a3	11	d	Nup60KR
		b2	19	d	Nup60KR
		b3	24	d	Nup60KR
		c3	34	d	Nup60KR
		d2	20	d	Nup60KR
		e3	20	d	Nup60KR
		e2	26	d	Nup60KR
		f2	12	d	Nup60KR
		f3	20	d	Nup60KR
		g2	25	d	Nup60KR
		h2	13	d	Nup60KR
		i2	14	d	Nup60KR
		a4	15	d	Nup60KR
		b4	16	d	Nup60KR
