# Supplementary material for: DNA circles promote yeast ageing in part through stimulating the reorganization of nuclear pore complexes
Source: eLife. 2022 Apr 4;11:e71196. doi: 10.7554/eLife.71196 (PMC9020822; doi:10.7554/eLife.71196)
Supplement: Supplementary file 1. [file elife-71196-supp1.xlsx]

## Sheet: S1_Strains and plasmids
Strain list:
yeast strains:
Lab ID	Name	mating type	genotype
yYB5552	NLS-3xGFP	a	his3∆1 ura3∆0 leu2∆0 met15∆0 pURA3:NLS-3GFP:URA3
yYB6271	Circle visualization strain Nup82-GFP	a	his3::HIS3 pGAL-Rec TetR-mCherry:Kan Gal4-EBD:Trp ura3-52 ade2-101 Nup82-GFP:hphNT1; pPCM14
yYB6272	Circle visualization strain	a	his3::HIS3 pGAL-Rec TetR-mCherry:Kan Gal4-EBD:Trp ura3-52 ade2-101; pPCM14
yYB7657, yYB7658, yYB7659	wt, BY4741	a	his3Δ1 leu2Δ0 met15Δ0 ura3Δ0
yYB9039	Circle visualization strain Nup170-GFP	a	his3::HIS3 pGAL-Rec TetR-mCherry:Kan Gal4-EBD:Trp ura3-52 ade2-101 Nup170-GFP:hphNT1; pPCM14
yYB9485	Circle visualization strain Nup1-GFP	a	his3::HIS3 pGAL-Rec TetR-mCherry:Kan Gal4-EBD:Trp ura3-52 ade2-101 Nup1-GFP:hphNT1; pPCM14
yYB9514	Circle visualization strain Nup2-GFP	a	his3::HIS3 pGAL-Rec TetR-mCherry:Kan Gal4-EBD:Trp ura3-52 ade2-101 Nup2-GFP:hphNT1; pPCM14
yYB9517; yYB9518	Circle visualization strain Nup60-GFP	a	his3::HIS3 pGAL-Rec TetR-mCherry:Kan Gal4-EBD:Trp ura3-52 ade2-101 Nup60-GFP:hphNT1; pPCM14
yYB10885	Nup170-mCherry-sfGFP	a	Nup170-mCherry-sfGFP:kanMX ura3-52 leu2Δ1 his3Δ200 trp1Δ63
yYB11477	Circle visualization strain Nup95-GFP	a	his3::HIS3 pGAL-Rec TetR-mCherry:Kan Gal4-EBD:Trp ura3-52 ade2-101 Nup95-GFP:hphNT1; pPCM14
yYB11497	Circle visualization strain Mlp2-GFP	a	his3::HIS3 pGAL-Rec TetR-mCherry:Kan Gal4-EBD:Trp ura3-52 ade2-101 Mlp2-GFP:hphNT1; pPCM14
yYB11499	Circle visualization strain Ulp1-GFP	a	his3::HIS3 pGAL-Rec TetR-mCherry:Kan Gal4-EBD:Trp ura3-52 ade2-101 Ulp1-GFP:hphNT1; pPCM14
yYB11500	Circle visualization strain Mex67-GFP	a	his3::HIS3 pGAL-Rec TetR-mCherry:Kan Gal4-EBD:Trp ura3-52 ade2-101 Mex67-GFP:hphNT1; pPCM14
yYB11501	Circle visualization strain Nup133-GFP	a	his3::HIS3 pGAL-Rec TetR-mCherry:Kan Gal4-EBD:Trp ura3-52 ade2-101 Nup133-GFP:hphNT1; pPCM14
yYB11789	Circle visualization strain Mlp1-GFP	a	his3::HIS3 pGAL-Rec TetR-mCherry:Kan Gal4-EBD:Trp ura3-52 ade2-101 Mlp1-GFP:hphNT1; pPCM14
yYB12413	Circle visualization strain Nic96-GFP	a	his3::HIS3 pGAL-Rec TetR-mCherry:Kan Gal4-EBD:Trp ura3-52 ade2-101 Nic96-GFP:hphNT1; pPCM14
yYB12414	Circle visualization strain Nup84-GFP	a	his3::HIS3 pGAL-Rec TetR-mCherry:Kan Gal4-EBD:Trp ura3-52 ade2-101 Nup84-GFP:hphNT1; pPCM14
yYB13284, yYB13285	Circle visualization strain Esc1-GFP	a	his3::HIS3 pGAL-Rec TetR-mCherry:Kan Gal4-EBD:Trp ura3-52 ade2-101 Esc1-GFP:hphNT1; pPCM14
yYB14751; yYB14752	Nup60K467R	a	his3Δ1 leu2Δ0 met15Δ0 ura3Δ0 Nup60K467R
yYB14797; yYB14798	Circle visualization strain Nup60K467R	a	his3::HIS3 pGAL-Rec TetR-mCherry:Kan Gal4-EBD:Trp ura3-52 ade2-101 Nup60K467R; pPCM14
yYB14797; yYB14798	Circle visualization strain Nup60K467R	a	his3::HIS3 pGAL-Rec TetR-mCherry:Kan Gal4-EBD:Trp ura3-52 ade2-101 Nup60K467R; pPCM14
yYB14974	Circle visualization strain Nup60K467R Nup170-GFP	a	his3::HIS3 pGAL-Rec TetR-mCherry:Kan Gal4-EBD:Trp ura3-52 ade2-101 Nup60K467R, Nup170-GFP:HygR; pPCM14
yYB14975	Circle visualization strain Nup60K467R Nup60-GFP	a	his3::HIS3 pGAL-Rec TetR-mCherry:Kan Gal4-EBD:Trp ura3-52 ade2-101 Nup60K467R, Nup60-GFP:HygR; pPCM14
yYB14977	Circle visualization strain Nup60K467R Mlp1-GFP	a	his3::HIS3 pGAL-Rec TetR-mCherry:Kan Gal4-EBD:Trp ura3-52 ade2-101 Nup60K467R, Mlp1-GFP:HygR; pPCM14
yYB15118	Circle visualization strain Nup116-GFP	a	his3::HIS3 pGAL-Rec TetR-mCherry:Kan Gal4-EBD:Trp ura3-52 ade2-101 Nup116-GFP:hphNT1; pPCM14
yYB15119	Circle visualization strain Nup53-GFP	a	his3::HIS3 pGAL-Rec TetR-mCherry:Kan Gal4-EBD:Trp ura3-52 ade2-101 Nup53-GFP:hphNT1; pPCM14
yYB15120	Circle visualization strain Chm7-GFP	a	his3::HIS3 pGAL-Rec TetR-mCherry:Kan Gal4-EBD:Trp ura3-52 ade2-101 Chm7-GFP:hphNT1; pPCM14
yYB15344	Mlp1-GFP Nup84-mCh	a	his3Δ1 leu2Δ0 met15Δ0 ura3Δ0 Mlp1-GFP:HIS3 Nup84-mCh:KanMX
yYB15345	Nup170-GFP Nup84-mCh	a	his3Δ1 leu2Δ0 met15Δ0 ura3Δ0 Nup170-GFP:HIS3 Nup84-mCh:KanMX
yYB15365	Circle visualization strain Mtr2-GFP	a	his3::HIS3 pGAL-Rec TetR-mCherry:Kan Gal4-EBD:Trp ura3-52 ade2-101 Mtr2-GFP:hphNT1; pPCM14
yYB15366	Circle visualization strain Nup42-GFP	a	his3::HIS3 pGAL-Rec TetR-mCherry:Kan Gal4-EBD:Trp ura3-52 ade2-101 Nup42-GFP:hphNT1; pPCM14
yYB15367	Circle visualization strain Gle1-GFP	a	his3::HIS3 pGAL-Rec TetR-mCherry:Kan Gal4-EBD:Trp ura3-52 ade2-101 Gle1-GFP:hphNT1; pPCM14
yYB15368	Circle visualization strain Gle2-GFP	a	his3::HIS3 pGAL-Rec TetR-mCherry:Kan Gal4-EBD:Trp ura3-52 ade2-101 Gle2-GFP:hphNT1; pPCM14
yYB15369	Circle visualization strain Dbp5-GFP	a	his3::HIS3 pGAL-Rec TetR-mCherry:Kan Gal4-EBD:Trp ura3-52 ade2-101 Dbp5-GFP:hphNT1; pPCM14
yYB15370	Circle visualization strain Msn5-GFP	a	his3::HIS3 pGAL-Rec TetR-mCherry:Kan Gal4-EBD:Trp ura3-52 ade2-101 Msn5-GFP:hphNT1; pPCM14
yYB15371	Circle visualization strain Los1-GFP	a	his3::HIS3 pGAL-Rec TetR-mCherry:Kan Gal4-EBD:Trp ura3-52 ade2-101 Los1-GFP:hphNT1; pPCM14
yYB15372	Circle visualization strain Crm1-GFP	a	his3::HIS3 pGAL-Rec TetR-mCherry:Kan Gal4-EBD:Trp ura3-52 ade2-101 Crm1-GFP:hphNT1; pPCM14
yYB15632	Circle visualization strain Nup59-GFP	a	his3::HIS3 pGAL-Rec TetR-mCherry:Kan Gal4-EBD:Trp ura3-52 ade2-101 Nup59-GFP:hphNT1; pPCM14
yYB15633	Circle visualization strain Nup159-GFP	a	his3::HIS3 pGAL-Rec TetR-mCherry:Kan Gal4-EBD:Trp ura3-52 ade2-101 Nup159-GFP:hphNT1; pPCM14
yYB15634	Circle visualization strain Kap60-GFP	a	his3::HIS3 pGAL-Rec TetR-mCherry:Kan Gal4-EBD:Trp ura3-52 ade2-101 Kap60-GFP:hphNT1; pPCM14
yYB15635	Circle visualization strain Sxm1-GFP	a	his3::HIS3 pGAL-Rec TetR-mCherry:Kan Gal4-EBD:Trp ura3-52 ade2-101 Sxm1-GFP:hphNT1; pPCM14
yYB15636	Circle visualization strain Cse1-GFP	a	his3::HIS3 pGAL-Rec TetR-mCherry:Kan Gal4-EBD:Trp ura3-52 ade2-101 Cse1-GFP:hphNT1; pPCM14
yYB15637	Circle visualization strain Mtr10-GFP	a	his3::HIS3 pGAL-Rec TetR-mCherry:Kan Gal4-EBD:Trp ura3-52 ade2-101 Mtr10-GFP:hphNT1; pPCM14
yYB15639	Circle visualization strain Kap120-GFP	a	his3::HIS3 pGAL-Rec TetR-mCherry:Kan Gal4-EBD:Trp ura3-52 ade2-101 Kap120-GFP:hphNT1; pPCM14
yYB15640	Circle visualization strain Kap122-GFP	a	his3::HIS3 pGAL-Rec TetR-mCherry:Kan Gal4-EBD:Trp ura3-52 ade2-101 Kap122-GFP:hphNT1; pPCM14
yYB15641	Circle visualization strain Kap123-GFP	a	his3::HIS3 pGAL-Rec TetR-mCherry:Kan Gal4-EBD:Trp ura3-52 ade2-101 Kap123-GFP:hphNT1; pPCM14
yYB15674	Nup60-GFP Nup159-mCh	a	his3Δ1 leu2Δ0 met15Δ0 ura3Δ0 Nup60-GFP:HIS3 Nup159-mCh:KanMX
yYB15675	Mlp1-GFP Nup159-mCh	a	his3Δ1 leu2Δ0 met15Δ0 ura3Δ0 Mlp1-GFP:HIS3 Nup159-mCh:KanMX
yYB15676	Nup170-GFP Nup159-mCh	a	his3Δ1 leu2Δ0 met15Δ0 ura3Δ0 Nup170-GFP:HIS3 Nup159-mCh:KanMX
yYB15756	Circle visualization strain Nab2-GFP	a	his3::HIS3 pGAL-Rec TetR-mCherry:Kan Gal4-EBD:Trp ura3-52 ade2-101 Nab2-GFP:hphNT1; pPCM14
yYB15758	Circle visualization strain Kap104-GFP	a	his3::HIS3 pGAL-Rec TetR-mCherry:Kan Gal4-EBD:Trp ura3-52 ade2-101 Kap104-GFP:hphNT1; pPCM14
yYB15760	Circle visualization strain Pse1-GFP	a	his3::HIS3 pGAL-Rec TetR-mCherry:Kan Gal4-EBD:Trp ura3-52 ade2-101 Pse1-GFP:hphNT1; pPCM14
yYB15780	Gle1-GFP Nup159-mCh	a	his3Δ1 leu2Δ0 met15Δ0 ura3Δ0 Gle1-GFP:HIS3 Nup159-mCh:KanMX
yYB15782	Circle visualization strain Nup60K467R Gle1-GFP	a	his3::HIS3 pGAL-Rec TetR-mCherry:Kan Gal4-EBD:Trp ura3-52 ade2-101 Nup60K467R, Gle1-GFP:HygR; pPCM14
yYB15783	Circle visualization strain Nup60K467R Gle2-GFP	a	his3::HIS3 pGAL-Rec TetR-mCherry:Kan Gal4-EBD:Trp ura3-52 ade2-101 Nup60K467R, Gle2-GFP:HygR; pPCM14
yYB15784	Circle visualization strain Nup60K467R Nup116-GFP	a	his3::HIS3 pGAL-Rec TetR-mCherry:Kan Gal4-EBD:Trp ura3-52 ade2-101 Nup60K467R, Nup116-GFP:HygR; pPCM14
yYB15918; yYB16009	Nup60-GFP Nup159-mCh Fob1Del	a	his3Δ1 leu2Δ0 met15Δ0 ura3Δ0 Nup60-GFP:HIS3 Nup159-mCh:KanMX Fob1::KanMX
yYB16042	Nup60-GFP Nup159-mCh SGF73Del	a	his3Δ1 leu2Δ0 met15Δ0 ura3Δ0 Nup60-GFP:HIS3 Nup159-mCh:KanMX Sgf73::HphNT1
yYB16043	Nup170-GFP Nup159-mCh SGF73Del	a	his3Δ1 leu2Δ0 met15Δ0 ura3Δ0 Nup170-GFP:HIS3 Nup159-mCh:KanMX Sgf73::HphNT1
yYB16050	Nup170-GFP Nup159-mCh Fob1Del	a	his3Δ1 leu2Δ0 met15Δ0 ura3Δ0 Nup170-GFP:HIS3 Nup159-mCh:KanMX Fob1::KanMX
yYB16109	Mlp1-GFP Nup159-mCh Sgf73Del	a	his3Δ1 leu2Δ0 met15Δ0 ura3Δ0 Mlp1-GFP:HIS3 Nup159-mCh:KanMX Sgf73::HygR
yYB16726	Nup60Del	a	his3Δ1 leu2Δ0 met15Δ0 ura3Δ0 Nup60::NatMX
yYB16788	Mlp1-GFP Nup159-mCh Fob1Del	a	his3Δ1 leu2Δ0 met15Δ0 ura3Δ0 Mlp1-GFP:HIS3 Nup159-mCh:KanMX Fob1::KanMX
yYB17311	Net1-mCherry Vps4-GFP	a	his3Δ1 leu2Δ0 met15Δ0 ura3Δ0 Vps4-GFP:HIS3 Net1- mCherry:hphNT1
yYB17312	Net1-mCherry Snf7-GFP	a	his3Δ1 leu2Δ0 met15Δ0 ura3Δ0 Snf7-GFP:HIS3 Net1- mCherry:hphNT1
yYB17374	Circle visualization strain Vps4-GFP	a	his3::HIS3 pGAL-Rec TetR-mCherry:Kan Gal4-EBD:Trp ura3-52 ade2-101 VPS4-GFP:hphNT1; pPCM14
yYB17375	Circle visualization strain Sac3-GFP	a	his3::HIS3 pGAL-Rec TetR-mCherry:Kan Gal4-EBD:Trp ura3-52 ade2-101 SAC3-GFP:hphNT; pPCM14
yYB17438	Circle visualization strain Snf7-GFP	a	his3::HIS3 pGAL-Rec TetR-mCherry:Kan Gal4-EBD:Trp ura3-52 ade2-101 SNF7-GFP:hphNT1; pPCM14
bacterial stocks
Plasmid number	description
2318	pML104_Cas9_HygR_Nup60
