# Supplementary figures and images for: DNA circles promote yeast ageing in part through stimulating the reorganization of nuclear pore complexes
Source: eLife journal article supplement (doi:10.7554/elife.71196), 2022-04-04

**A**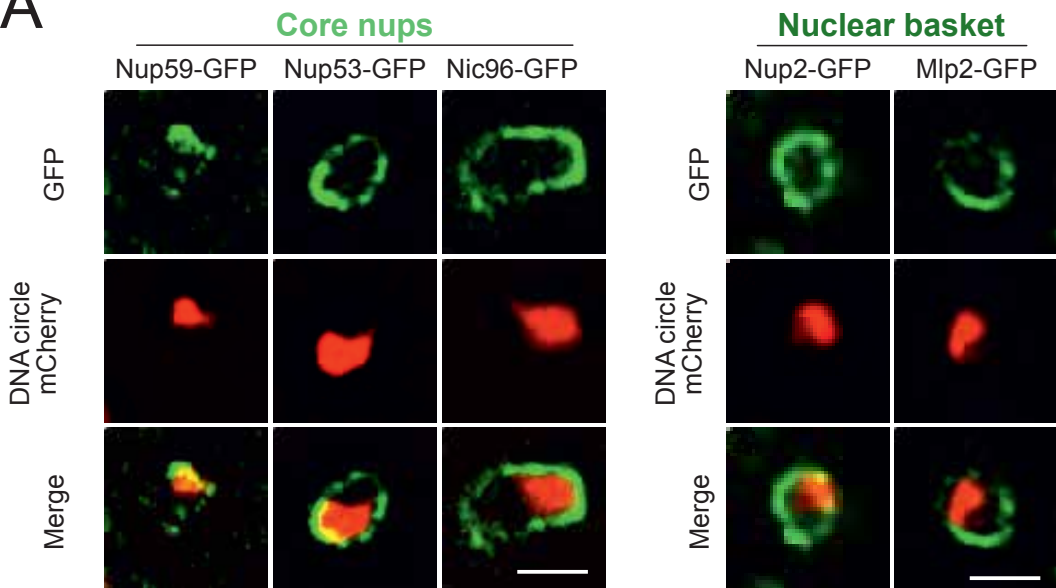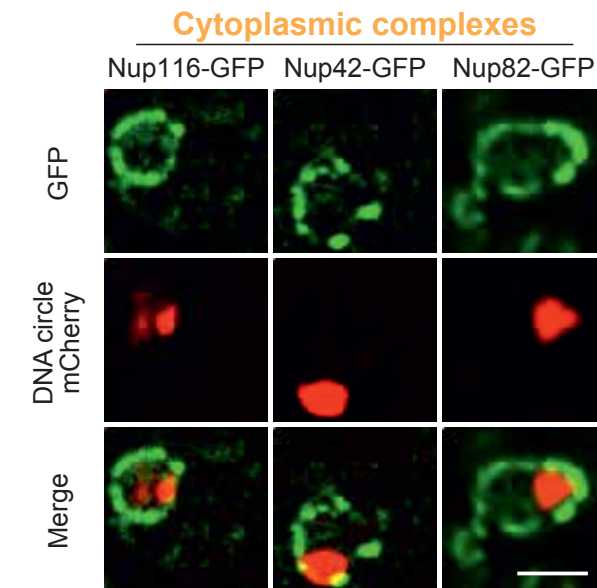**B**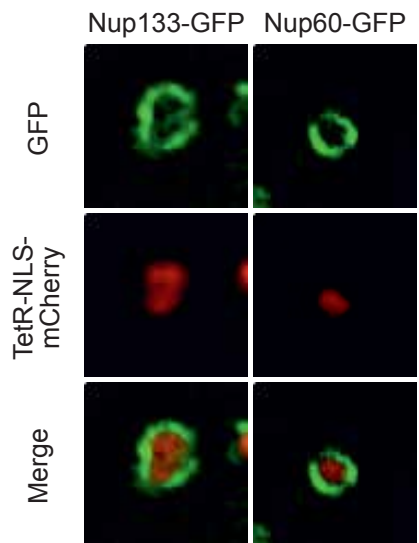

Supplement: supp [file elife-71196-supp-v1.zip]

A

Chm7-GFP

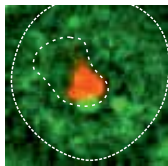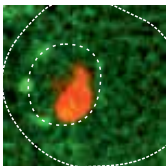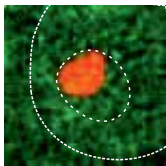DNA circle  
mCherry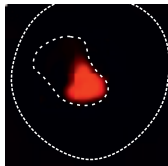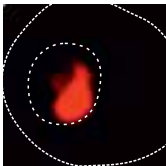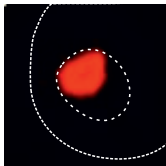

Merge

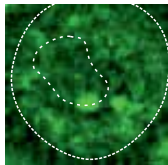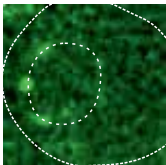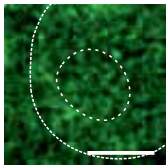

1:  $36 \pm 4\%$     2:  $23 \pm 3\%$     3:  $41 \pm 4\%$

Supplement: supp [file elife-71196-supp-v1.zip]
